# Supplementary material for: Proteomic and metabolomic signatures of rectal tumor discriminate patients with different responses to preoperative radiotherapy
Source: Frontiers journal article supplement (doi:10.3389/fonc.2024.1323961), 2024-02-12

A) ALL IDENTIFIED PROTEINS

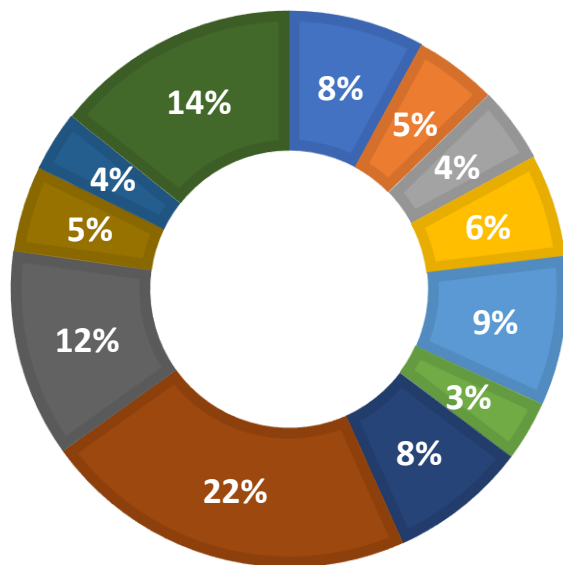

C) DIFFERENTIALLY ACUMULATED PROTEINS

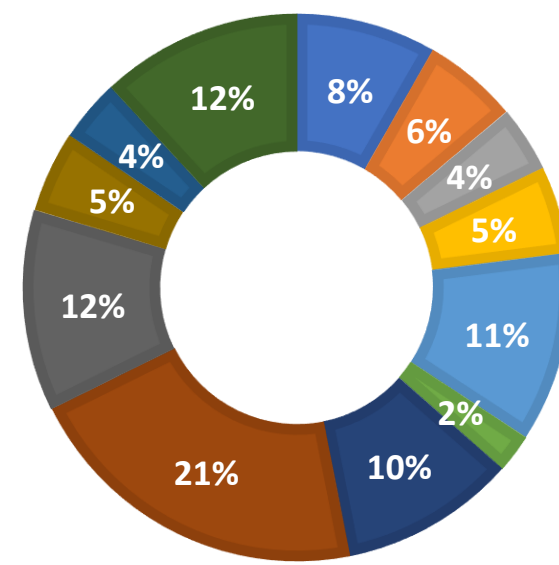

B) ALL ANNOTATED METABOLITES

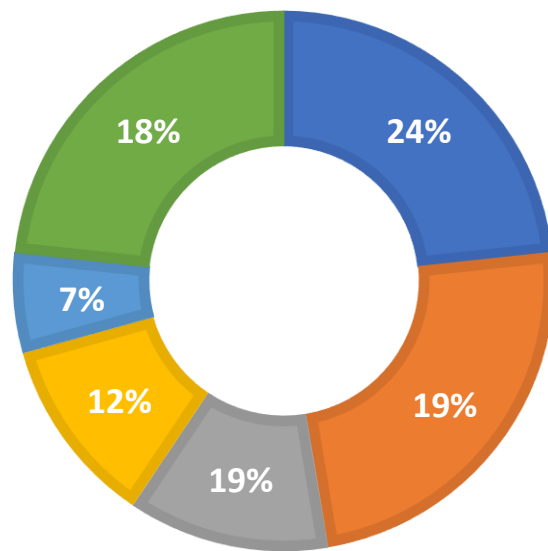

D) DIFFERENTIALLY ACUMULATED METABOLITES

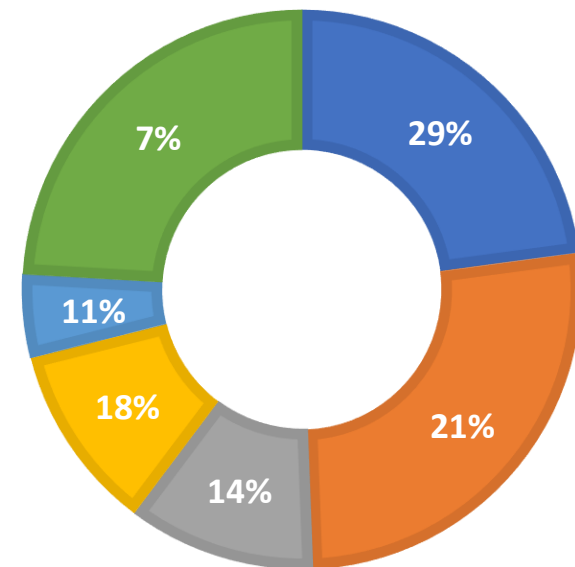

Supplement: Image_1.PDF [file Image_1.PDF]
