# Supplementary material for: Proteomic and metabolomic signatures of rectal tumor discriminate patients with different responses to preoperative radiotherapy
Source: Frontiers journal article supplement (doi:10.3389/fonc.2024.1323961), 2024-02-12

- A)
- Antigen processing and presentation of endogenous peptide antigen via MHC class I
- Antigen Presentation: Folding, assembly and peptide loading of class I MHC
- Antigen processing and presentation of exogenous peptide antigen via mhc class I, tap-dependent
- Antigen processing and presentation of peptide antigen via MHC class I
- Interleukin-1-mediated signaling pathway
- Interleukin-12-mediated signaling pathway
- MHC class II antigen presentation
- T cell receptor signaling pathway
- Neutrophil degranulation
- Leukocyte degranulation
- Leukocyte mediated immunity
- Leukocyte activation involved in immune response

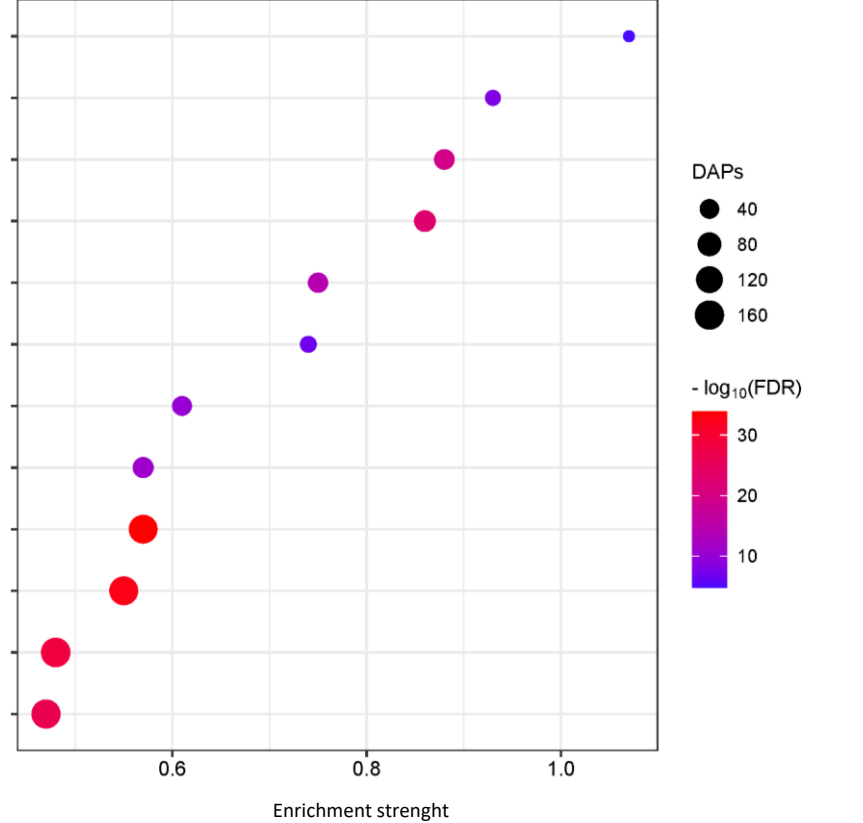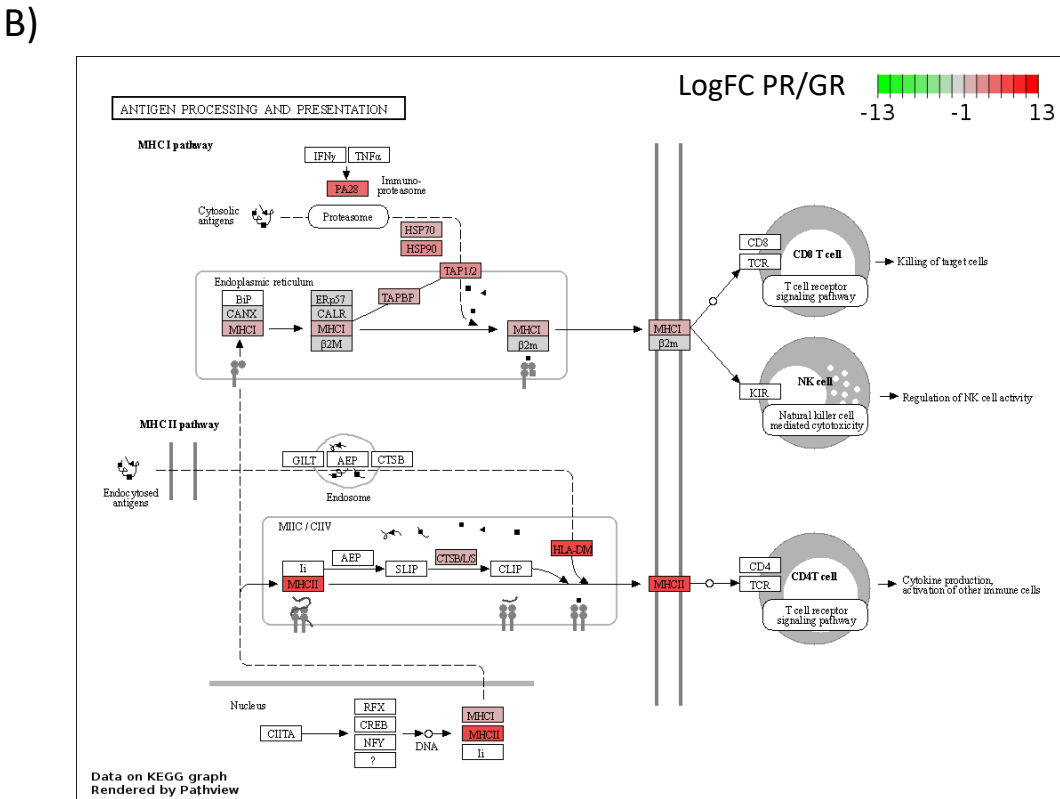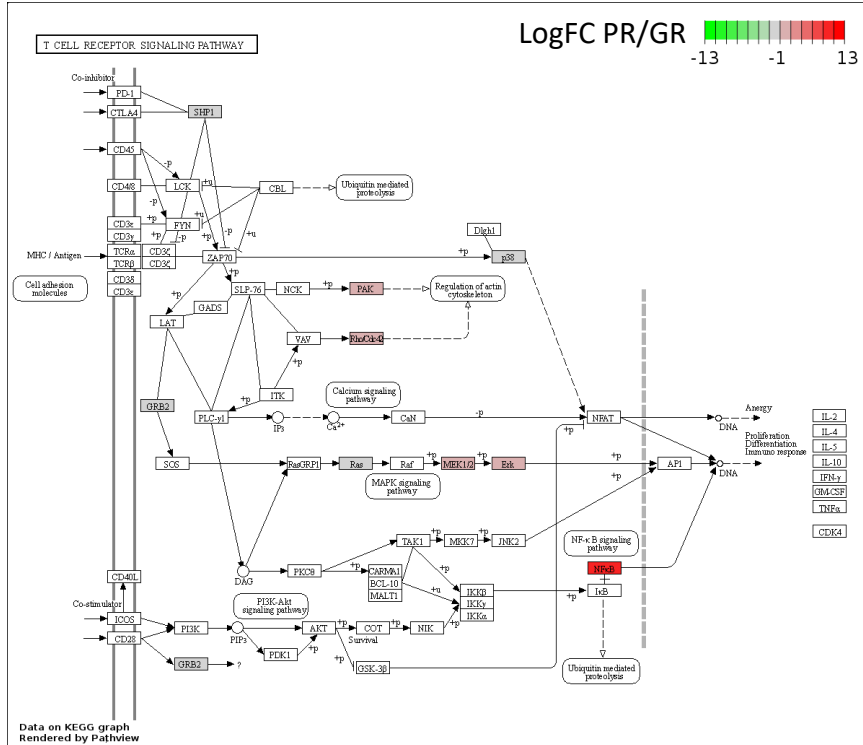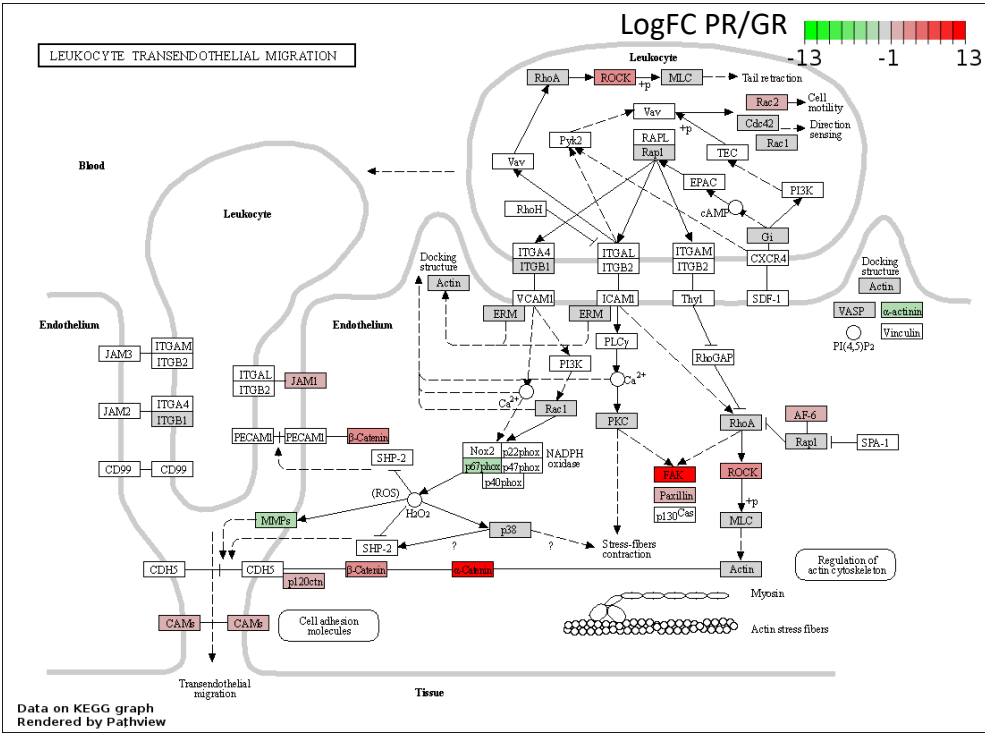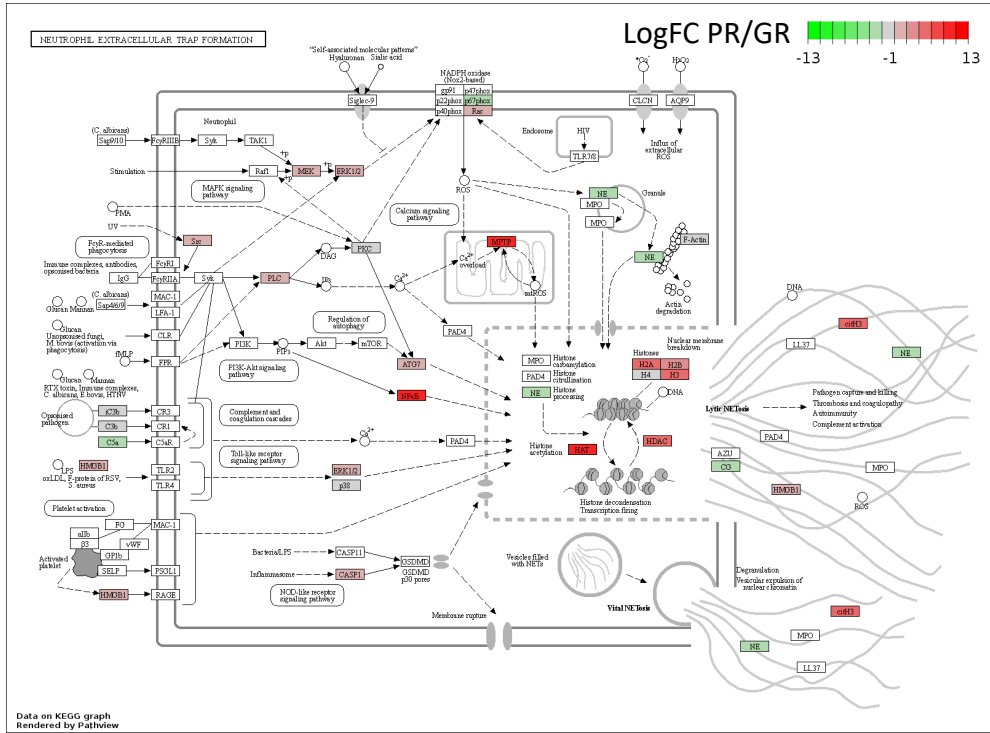

Supplement: Image_4.PDF [file Image_4.PDF]
