# Supplementary material for: Proteomic and metabolomic signatures of rectal tumor discriminate patients with different responses to preoperative radiotherapy
Source: Front Oncol. 2024 Feb 12;14:1323961. doi: 10.3389/fonc.2024.1323961 (PMC10896604; doi:10.3389/fonc.2024.1323961)
Supplement: Supplementary file 11 [file Table_1.xlsx]

## Sheet: A
Table S1. Proteins identified in the rectal cancer tissue.
A. All proteins detected.
No	Accession number	Gene name	Protein name	Coverage [%]	# Peptides	# PSMs	# Unique Peptides	p-value (T-testT/WelchW/U-Mann-WhitneyU/X2)		FDR (Benjamini-Hochberg)	FC GR/PR (Fold changeF/Hodges-LehmannH)		Effect size GR/PR (Hedges'gH/RBCCR)
2532	Q9P0J1	PDP1	[Pyruvate dehydrogenase [acetyl-transferring]]-phosphatase 1, mitochondrial					0.00102874	U	0.00339629	0.000757483	H	-0.86	R
2340	Q9BV57	ADI1	1,2-dihydroxy-3-keto-5-methylthiopentene dioxygenase					0.00908243	U	0.0179029	0.338791	H	-0.7	R
1623	Q04446	GBE1	1,4-alpha-glucan-branching enzyme					0.222554	T	0.280376	0.696692	FC	-0.565024	H
1444	P61604	HSPE1	10 kDa heat shock protein, mitochondrial					0.000343326	T	0.00151918	0.191394	FC	-1.96899	H
1835	Q15029	EFTUD2	116 kDa U5 small nuclear ribonucleoprotein component					0.00344147	T	0.00858982	0.572079	FC	-1.50529	H
2477	Q9NRX4	PHPT1	14 kDa phosphohistidine phosphatase					0.361852	T	0.424287	0.857999	FC	-0.418423	H
1039	P31946	YWHAB	14-3-3 protein beta/alpha					0.000327851	T	0.00146946	0.412402	FC	-1.97832	H
1465	P62258	YWHAE	14-3-3 protein epsilon					1.33275e-05	T	0.000271707	0.477931	FC	-2.64676	H
1628	Q04917	YWHAH	14-3-3 protein eta					0.623176	U	0.677777	0.915937	H	-0.14	R
1455	P61981	YWHAG	14-3-3 protein gamma					0.00126112	T	0.00389635	0.459012	FC	-1.70726	H
1040	P31947	SFN	14-3-3 protein sigma					0.000182672	U	0.00187244	0.156039	H	-1	R
949	P27348	YWHAQ	14-3-3 protein theta					0.0565126	T	0.0866299	0.765168	FC	-0.911455	H
1514	P63104	YWHAZ	14-3-3 protein zeta/delta					7.35772e-05	T	0.00058381	0.440362	FC	-2.28424	H
2379	Q9C0C2	TNKS1BP1	182 kDa tankyrase-1-binding protein					0.000122106	T	0.000800565	0.195445	FC	-2.17961	H
1599	Q01970	PLCB3	1-phosphatidylinositol 4,5-bisphosphate phosphodiesterase beta-3					0.0136609	U	0.0256088	0.135885	H	-0.66	R
787	P16885	PLCG2	1-phosphatidylinositol 4,5-bisphosphate phosphodiesterase gamma-2					0.0640221	U	0.0931807	0.389619	H	-0.5	R
613	P09543	CNP	2',3'-cyclic-nucleotide 3'-phosphodiesterase					0.00832489	T	0.0176414	0.614086	FC	-1.32518	H
1919	Q16698	DECR1	2,4-dienoyl-CoA reductase, mitochondrial					0.000527178	T	0.00202254	0.294283	FC	-1.88247	H
1987	Q6L8Q7	PDE12	2',5'-phosphodiesterase 12					0.00115158	T	0.00360982	0.17983	FC	-1.72549	H
2739	Q9Y6K5	OAS3	2'-5'-oligoadenylate synthase 3					0.962221	T	0.979404	0.984706	FC	-0.0214798	H
2283	Q99460	PSMD1	26S proteasome non-ATPase regulatory subunit 1					7.22589e-05	T	0.000581611	0.347473	FC	-2.288	H
253	O75832	PSMD10	26S proteasome non-ATPase regulatory subunit 10					7.8609e-06	T	0.000228703	0.415991	FC	-2.76239	H
36	O00231	PSMD11	26S proteasome non-ATPase regulatory subunit 11					0.000115531	T	0.000771954	0.450649	FC	-2.19099	H
37	O00232	PSMD12	26S proteasome non-ATPase regulatory subunit 12					0.000329839	U	0.00187244	0.235724	H	-0.96	R
2636	Q9UNM6	PSMD13	26S proteasome non-ATPase regulatory subunit 13					0.00105226	T	0.00338201	0.35201	FC	-1.74359	H
53	O00487	PSMD14	26S proteasome non-ATPase regulatory subunit 14					0.00716246	T	0.0156043	0.364329	FC	-1.35612	H
1709	Q13200	PSMD2	26S proteasome non-ATPase regulatory subunit 2					0.00069089	T	0.00247392	0.486628	FC	-1.82807	H
129	O43242	PSMD3	26S proteasome non-ATPase regulatory subunit 3					0.000717867	T	0.00254765	0.465504	FC	-1.82037	H
1360	P55036	PSMD4	26S proteasome non-ATPase regulatory subunit 4					0.00574526	T	0.0131099	0.595744	FC	-1.40124	H
1904	Q16401	PSMD5	26S proteasome non-ATPase regulatory subunit 5					0.0173487	T	0.0322671	0.567439	FC	-1.17176	H
1832	Q15008	PSMD6	26S proteasome non-ATPase regulatory subunit 6					4.0499e-06	T	0.000173179	0.307778	FC	-2.91047	H
1302	P51665	PSMD7	26S proteasome non-ATPase regulatory subunit 7					0.0123559	T	0.0242176	0.591634	FC	-1.24323	H
1219	P48556	PSMD8	26S proteasome non-ATPase regulatory subunit 8					0.000364989	T	0.00158049	0.310727	FC	-1.95663	H
38	O00233	PSMD9	26S proteasome non-ATPase regulatory subunit 9					0.000612093	T	0.00226734	1.84279	FC	1.85242	H
1477	P62333	PSMC6	26S proteasome regulatory subunit 10B					0.000136149	T	0.000846915	0.467433	FC	-2.15726	H
1460	P62191	PSMC1	26S proteasome regulatory subunit 4					0.000392928	T	0.00165278	0.412624	FC	-1.94173	H
807	P17980	PSMC3	26S proteasome regulatory subunit 6A					0.000160742	T	0.000945163	0.267801	FC	-2.12325	H
1176	P43686	PSMC4	26S proteasome regulatory subunit 6B					0.000101334	T	0.000712927	0.372925	FC	-2.218	H
1092	P35998	PSMC2	26S proteasome regulatory subunit 7					0.000369651	T	0.00159278	0.393369	FC	-1.95406	H
1461	P62195	PSMC5	26S proteasome regulatory subunit 8					0.000879541	T	0.00295615	0.366802	FC	-1.77958	H
1730	Q13442	PDAP1	28 kDa heat- and acid-stable phosphoprotein	41	4	38	4	0.0147823	W	0.0295645	0.639232	FC	-1.30565	H
1556	P82650	MRPS22	28S ribosomal protein S22, mitochondrial					0.00859422	U	0.0175594	0.12546	H	-0.7	R
2154	Q92552	MRPS27	28S ribosomal protein S27, mitochondrial					0.00247475	T	0.00667755	0.326644	FC	-1.57181	H
1289	P51398	DAP3	28S ribosomal protein S29, mitochondrial					0.000172654	U	0.00187244	0.0789076	H	-1	R
1559	P82930	MRPS34	28S ribosomal protein S34, mitochondrial					0.0507393	T	0.0788619	0.509205	FC	-0.936209	H
1557	P82673	MRPS35	28S ribosomal protein S35, mitochondrial					0.000121165	U	0.00187244	0.000992421	H	-0.98	R
1558	P82909	MRPS36	28S ribosomal protein S36, mitochondrial					0.0451546	U	0.0682819	1.27339	H	0.54	R
1560	P82932	MRPS6	28S ribosomal protein S6, mitochondrial					0.0187472	U	0.0329728	0.00221076	H	-0.54	R
2664	Q9Y2R9	MRPS7	28S ribosomal protein S7, mitochondrial					0.00100548	U	0.00333564	0.000518278	H	-0.84	R
1561	P82933	MRPS9	28S ribosomal protein S9, mitochondrial					0.00105993	T	0.00339493	0.276096	FC	-1.74213	H
145	O43598	DNPH1	2'-deoxynucleoside 5'-phosphate N-hydrolase 1					0.96985	U	0.986091	1.06607	H	0.02	R
1319	P52758	RIDA	2-iminobutanoate/2-iminopropanoate deaminase					0.000243759	U	0.00187244	0.000437986	H	-0.96	R
1961	Q5HYK3	COQ5	2-methoxy-6-polyprenyl-1,4-benzoquinol methylase, mitochondrial					0.0201729	U	0.035369	0.0281718	H	-0.62	R
1602	Q02218	OGDH	2-oxoglutarate dehydrogenase, mitochondrial					0.352223	T	0.414214	0.851526	FC	-0.427094	H
327	O95861	BPNT1	3'(2'),5'-bisphosphate nucleotidase 1					0.0034765	T	0.00866178	0.17475	FC	-1.50324	H
2368	Q9BYD6	MRPL1	39S ribosomal protein L1, mitochondrial					0.00908626	T	0.0188543	0.0369927	FC	-1.30712	H
1323	P52815	MRPL12	39S ribosomal protein L12, mitochondrial					2.55544e-06	T	0.000164534	0.150082	FC	-3.01527	H
2366	Q9BYD1	MRPL13	39S ribosomal protein L13, mitochondrial					0.253793	T	0.312508	0.54365	FC	-0.527213	H
1236	P49406	MRPL19	39S ribosomal protein L19, mitochondrial					0.00126041	U	0.00397472	0.115963	H	-0.86	R
2198	Q96A35	MRPL24	39S ribosomal protein L24, mitochondrial					0.00100548	U	0.00333564	0.000432108	H	-0.84	R
2370	Q9BZE1	MRPL37	39S ribosomal protein L37, mitochondrial					0.014719	U	0.0268343	0.000786211	H	-0.56	R
2512	Q9NYK5	MRPL39	39S ribosomal protein L39, mitochondrial					0.001444	U	0.00435069	0.00132916	H	-0.78	R
2367	Q9BYD3	MRPL4	39S ribosomal protein L4, mitochondrial					0.00123464	U	0.00397472	0.000781898	H	-0.81	R
2430	Q9H9J2	MRPL44	39S ribosomal protein L44, mitochondrial					0.00102814	T	0.00332324	0.137437	FC	-1.74824	H
2320	Q9BRJ2	MRPL45	39S ribosomal protein L45, mitochondrial					0.0033629	U	0.00834154	0.022521	H	-0.78	R
1723	Q13405	MRPL49	39S ribosomal protein L49, mitochondrial					0.000853272	T	0.00288962	0.230654	FC	-1.78567	H
2231	Q96EL3	MRPL53	39S ribosomal protein L53, mitochondrial					0.0685825	T	0.102488	2.79301	FC	0.866319	H
2294	Q99714	HSD17B10	3-hydroxyacyl-CoA dehydrogenase type-2					0.000468866	T	0.00186545	0.497235	FC	-1.90608	H
2339	Q9BUT1	BDH2	3-hydroxybutyrate dehydrogenase type 2					0.427355	U	0.490186	0.844182	H	-0.22	R
1034	P31937	HIBADH	3-hydroxyisobutyrate dehydrogenase, mitochondrial					2.65691e-05	T	0.000368469	0.29856	FC	-2.49837	H
1990	Q6NVY1	HIBCH	3-hydroxyisobutyryl-CoA hydrolase, mitochondrial					0.00938679	T	0.0193343	0.549845	FC	-1.30039	H
1163	P42765	ACAA2	3-ketoacyl-CoA thiolase, mitochondrial					0.000470676	T	0.00186998	0.423109	FC	-1.90531	H
597	P09110	ACAA1	3-ketoacyl-CoA thiolase, peroxisomal					0.009909	T	0.0201866	0.446728	FC	-1.28917	H
921	P25325	MPST	3-mercaptopyruvate sulfurtransferase					0.0100413	T	0.0203967	0.0835253	FC	-1.28642	H
1197	P46783	RPS10	40S ribosomal protein S10					0.580199	T	0.637205	0.856272	FC	-0.251903	H
1470	P62280	RPS11	40S ribosomal protein S11					0.000597002	T	0.00222028	0.456802	FC	-1.85744	H
922	P25398	RPS12	40S ribosomal protein S12					0.000124206	T	0.000808464	0.38384	FC	-2.1761	H
1469	P62277	RPS13	40S ribosomal protein S13					0.000286116	T	0.00134759	0.408402	FC	-2.0059	H
1466	P62263	RPS14	40S ribosomal protein S14					3.56772e-05	T	0.000403427	0.377286	FC	-2.43584	H
1492	P62841	RPS15	40S ribosomal protein S15					0.364769	T	0.42699	0.807424	FC	-0.415827	H
1463	P62244	RPS15A	40S ribosomal protein S15a					0.000453251	T	0.0018273	0.4346	FC	-1.91291	H
1464	P62249	RPS16	40S ribosomal protein S16	37	13	168	13	0.000234243	W	0.00183775	0.374252	FC	-2.253	H
589	P08708	RPS17	40S ribosomal protein S17					0.00022218	T	0.00115129	0.22502	FC	-2.05725	H
1468	P62269	RPS18	40S ribosomal protein S18					0.000547484	T	0.00207761	0.269918	FC	-1.87486	H
1122	P39019	RPS19	40S ribosomal protein S19					0.000178761	T	0.000996564	0.4625	FC	-2.10155	H
766	P15880	RPS2	40S ribosomal protein S2					0.000459035	T	0.00184472	0.400529	FC	-1.91036	H
1407	P60866	RPS20	40S ribosomal protein S20					5.93394e-05	T	0.000540983	0.384795	FC	-2.32901	H
1519	P63220	RPS21	40S ribosomal protein S21					0.00058284	U	0.00242604	0.209086	H	-0.92	R
1467	P62266	RPS23	40S ribosomal protein S23					0.000698145	T	0.00249135	0.410256	FC	-1.82597	H
1493	P62847	RPS24	40S ribosomal protein S24					0.000762429	T	0.00266516	0.316953	FC	-1.80827	H
1494	P62851	RPS25	40S ribosomal protein S25					0.000258706	T	0.00126989	0.30915	FC	-2.02632	H
1495	P62854	RPS26	40S ribosomal protein S26					0.00161452	T	0.00478193	0.364343	FC	-1.65767	H
1161	P42677	RPS27	40S ribosomal protein S27					6.01615e-05	T	0.000540983	0.287154	FC	-2.32614	H
2021	Q71UM5	RPS27L	40S ribosomal protein S27-like					0.160542	T	0.212006	0.484649	FC	-0.654552	H
1496	P62857	RPS28	40S ribosomal protein S28					9.53354e-05	T	0.000695227	0.345815	FC	-2.23059	H
900	P23396	RPS3	40S ribosomal protein S3					0.000110088	T	0.000753617	0.356952	FC	-2.20092	H
1433	P61247	RPS3A	40S ribosomal protein S3a					0.246659	T	0.305372	0.769325	FC	-0.53552	H
1481	P62701	RPS4X	40S ribosomal protein S4, X isoform					0.000146564	T	0.000886047	0.375896	FC	-2.14215	H
875	P22090	RPS4Y1	40S ribosomal protein S4, Y isoform 1					0.0851901	T	0.123475	0.381276	FC	-0.814608	H
1196	P46782	RPS5	40S ribosomal protein S5					0.000654975	T	0.00237577	0.429603	FC	-1.8388	H
1485	P62753	RPS6	40S ribosomal protein S6					0.00173541	T	0.00506478	0.389442	FC	-1.64317	H
1457	P62081	RPS7	40S ribosomal protein S7					0.000385944	T	0.0016407	0.342584	FC	-1.94535	H
1462	P62241	RPS8	40S ribosomal protein S8					0.000588823	T	0.00220158	0.405051	FC	-1.86021	H
1195	P46781	RPS9	40S ribosomal protein S9					0.00147686	T	0.00445451	0.422559	FC	-1.67556	H
593	P08865	RPSA	40S ribosomal protein SA					3.82876e-05	T	0.000419361	0.392619	FC	-2.42093	H
1553	P80404	ABAT	4-aminobutyrate aminotransferase, mitochondrial					0.316433	T	0.377046	0.625468	FC	-0.460845	H
563	P08195	SLC3A2	4F2 cell-surface antigen heavy chain					0.0031469	T	0.0080488	0.238188	FC	-1.52337	H
1229	P49189	ALDH9A1	4-trimethylaminobutyraldehyde dehydrogenase					3.45507e-05	T	0.000395493	0.654196	FC	-2.44263	H
2117	Q8TCD5	NT5C	5'(3')-deoxyribonucleotidase, cytosolic type					0.00259064	T	0.00693071	0.289835	FC	-1.56259	H
2389	Q9H0D6	XRN2	5'-3' exoribonuclease 2					0.00106323	T	0.00339887	0.313921	FC	-1.74151	H
1699	Q13131	PRKAA1	5'-AMP-activated protein kinase catalytic subunit alpha-1					0.000729982	T	0.0025782	0.178269	FC	-1.81701	H
1348	P54619	PRKAG1	5'-AMP-activated protein kinase subunit gamma-1					0.017799	T	0.0328352	0.289395	FC	-1.16631	H
864	P21589	NT5E	5'-nucleotidase					0.137808	T	0.186211	1.59633	FC	0.694561	H
84	O14841	OPLAH	5-oxoprolinase					0.00459001	U	0.0104738	0.0129983	H	-0.75	R
659	P10809	HSPD1	60 kDa heat shock protein, mitochondrial					7.9571e-05	T	0.000622526	0.180577	FC	-2.26799	H
644	P10155	RO60	60 kDa SS-A/Ro ribonucleoprotein					5.56954e-05	T	0.000523762	0.46548	FC	-2.34225	H
495	P05388	RPLP0	60S acidic ribosomal protein P0					0.000274766	T	0.00131569	0.339416	FC	-2.0141	H
494	P05387	RPLP2	60S acidic ribosomal protein P2					0.000124468	T	0.000808464	0.450204	FC	-2.17567	H
953	P27635	RPL10	60S ribosomal protein L10					0.000387022	T	0.00164278	0.330085	FC	-1.94479	H
1501	P62906	RPL10A	60S ribosomal protein L10a	57	22	210	22	0.00142263	W	0.00512697	0.421931	FC	-1.83297	H
1503	P62913	RPL11	60S ribosomal protein L11					0.000392302	T	0.00165264	0.418444	FC	-1.94205	H
998	P30050	RPL12	60S ribosomal protein L12					6.08579e-05	T	0.000540983	0.39042	FC	-2.32374	H
935	P26373	RPL13	60S ribosomal protein L13					0.000399226	T	0.00166922	0.301536	FC	-1.93852	H
1135	P40429	RPL13A	60S ribosomal protein L13a					0.791337	U	0.831529	1.28674	H	0.08	R
1280	P50914	RPL14	60S ribosomal protein L14					5.65393e-06	T	0.000189158	0.297105	FC	-2.83556	H
1436	P61313	RPL15	60S ribosomal protein L15					0.00131523	T	0.00404988	0.421733	FC	-1.69882	H
816	P18621	RPL17	60S ribosomal protein L17					0.0344093	T	0.0567327	0.558182	FC	-1.02351	H
1645	Q07020	RPL18	60S ribosomal protein L18					0.00106971	T	0.00340673	0.385552	FC	-1.74029	H
1605	Q02543	RPL18A	60S ribosomal protein L18a					0.000593068	T	0.00221027	0.372137	FC	-1.85877	H
1569	P84098	RPL19	60S ribosomal protein L19					0.0214225	T	0.0381103	0.556015	FC	-1.12674	H
1193	P46778	RPL21	60S ribosomal protein L21					2.95947e-05	T	0.000374453	0.187575	FC	-2.47544	H
1070	P35268	RPL22	60S ribosomal protein L22					0.000156684	T	0.000928305	0.355619	FC	-2.12848	H
1490	P62829	RPL23	60S ribosomal protein L23					9.63943e-06	T	0.000234217	0.289163	FC	-2.71749	H
1484	P62750	RPL23A	60S ribosomal protein L23a					0.00876778	T	0.0183709	0.502927	FC	-1.31449	H
1564	P83731	RPL24	60S ribosomal protein L24					0.00205798	T	0.00582365	0.334955	FC	-1.60891	H
1434	P61254	RPL26	60S ribosomal protein L26					0.00290827	T	0.00760503	0.472603	FC	-1.53928	H
1438	P61353	RPL27	60S ribosomal protein L27					0.000209046	T	0.00110581	0.376833	FC	-2.06965	H
1191	P46776	RPL27A	60S ribosomal protein L27a					0.0110077	T	0.0219134	0.427524	FC	-1.26733	H
1194	P46779	RPL28	60S ribosomal protein L28					0.00106934	T	0.00340673	0.393771	FC	-1.74036	H
1123	P39023	RPL3	60S ribosomal protein L3					0.000381157	T	0.00162495	0.395981	FC	-1.94787	H
1499	P62888	RPL30	60S ribosomal protein L30					7.28252e-05	T	0.000582226	0.42705	FC	-2.28638	H
1500	P62899	RPL31	60S ribosomal protein L31					0.00082308	T	0.00280692	0.328128	FC	-1.7929	H
1502	P62910	RPL32	60S ribosomal protein L32					0.00215456	T	0.00602975	0.355313	FC	-1.59969	H
1230	P49207	RPL34	60S ribosomal protein L34					0.00163336	T	0.00481849	0.42301	FC	-1.65534	H
1164	P42766	RPL35	60S ribosomal protein L35					0.00762042	T	0.0163974	0.380113	FC	-1.34339	H
810	P18077	RPL35A	60S ribosomal protein L35a					0.00165762	T	0.00486828	0.458241	FC	-1.65238	H
2192	Q969Q0	RPL36AL	60S ribosomal protein L36a-like					0.000218276	T	0.0011374	0.298275	FC	-2.06085	H
1441	P61513	RPL37A	60S ribosomal protein L37a					0.024934	T	0.043471	0.47936	FC	-1.09401	H
1517	P63173	RPL38	60S ribosomal protein L38					0.00151817	T	0.00453018	0.39301	FC	-1.67002	H
1100	P36578	RPL4	60S ribosomal protein L4					0.002184	T	0.0060756	0.478754	FC	-1.59696	H
1192	P46777	RPL5	60S ribosomal protein L5					0.000305756	T	0.00141011	0.427972	FC	-1.99245	H
1611	Q02878	RPL6	60S ribosomal protein L6					0.00279798	T	0.00738636	0.445529	FC	-1.54708	H
812	P18124	RPL7	60S ribosomal protein L7					0.000540545	T	0.00205968	0.315846	FC	-1.87743	H
1478	P62424	RPL7A	60S ribosomal protein L7a					0.00032198	T	0.00145281	0.377202	FC	-1.98198	H
1504	P62917	RPL8	60S ribosomal protein L8					0.00181184	T	0.005244	0.465388	FC	-1.63451	H
1051	P32969	RPL9	60S ribosomal protein L9	19	5	42	5	0.00138472	W	0.00504241	0.413593	FC	-1.84136	H
200	O60825	PFKFB2	6-phosphofructo-2-kinase/fructose-2,6-bisphosphatase 2					0.241457	T	0.299862	0.626795	FC	-0.541694	H
1310	P52209	PGD	6-phosphogluconate dehydrogenase, decarboxylating					0.0592631	T	0.0904492	0.708349	FC	-0.900456	H
299	O95336	PGLS	6-phosphogluconolactonase					1.54723e-05	T	0.000290154	0.49569	FC	-2.61441	H
570	P08253	MMP2	72 kDa type IV collagenase					0.00234998	T	0.00645859	4.05055	FC	1.58222	H
2072	Q8IZP0	ABI1	Abl interactor 1					0.0376353	U	0.0590205	0.548218	H	-0.56	R
13	A1L0T0	ILVBL	Acetolactate synthase-like protein					0.000329839	U	0.00187244	0.34784	H	-0.96	R
2348	Q9BWD1	ACAT2	Acetyl-CoA acetyltransferase, cytosolic					0.000180584	T	0.00100472	0.286261	FC	-2.09948	H
914	P24752	ACAT1	Acetyl-CoA acetyltransferase, mitochondrial					0.000139294	T	0.000856932	0.501152	FC	-2.15258	H
2488	Q9NUB1	ACSS1	Acetyl-coenzyme A synthetase 2-like, mitochondrial					0.00138143	T	0.00420297	0.202201	FC	-1.68897	H
2467	Q9NR19	ACSS2	Acetyl-coenzyme A synthetase, cytoplasmic					0.000700291	U	0.00282438	0.0684419	H	-0.9	R
1737	Q13510	ASAH1	Acid ceramidase					0.0141795	T	0.027107	0.521841	FC	-1.21437	H
1127	P39687	ANP32A	Acidic leucine-rich nuclear phosphoprotein 32 family member A					0.000269357	T	0.00129934	0.374608	FC	-2.01813	H
2164	Q92688	ANP32B	Acidic leucine-rich nuclear phosphoprotein 32 family member B					9.08767e-06	T	0.000234217	0.174599	FC	-2.73044	H
2331	Q9BTT0	ANP32E	Acidic leucine-rich nuclear phosphoprotein 32 family member E					1.80796e-05	T	0.00029469	0.277767	FC	-2.58081	H
2299	Q99798	ACO2	Aconitate hydratase, mitochondrial					0.000558283	T	0.00210146	0.604163	FC	-1.87093	H
1532	P68133	ACTA1	Actin, alpha skeletal muscle					0.00706621	T	0.0154549	2.07507	FC	1.3589	H
1522	P63261	ACTG1	Actin, cytoplasmic 2					0.00884683	T	0.0184811	1.23449	FC	1.31264	H
1523	P63267	ACTG2	Actin, gamma-enteric smooth muscle					0.00502044	T	0.0117635	2.30072	FC	1.42872	H
335	O96019	ACTL6A	Actin-like protein 6A					0.212294	U	0.267089	0.368582	H	-0.34	R
1426	P61160	ACTR2	Actin-related protein 2					0.00482087	T	0.0113626	0.637299	FC	-1.43697	H
2166	Q92747	ARPC1A	Actin-related protein 2/3 complex subunit 1A					0.00681292	T	0.0150423	0.404982	FC	-1.36638	H
104	O15143	ARPC1B	Actin-related protein 2/3 complex subunit 1B					0.681781	T	0.732954	1.12579	FC	0.186381	H
105	O15144	ARPC2	Actin-related protein 2/3 complex subunit 2					0.459796	T	0.522887	0.842447	FC	-0.337813	H
106	O15145	ARPC3	Actin-related protein 2/3 complex subunit 3					0.0103591	T	0.0209053	0.610862	FC	-1.27996	H
1399	P59998	ARPC4	Actin-related protein 2/3 complex subunit 4					0.0178754	T	0.0329545	0.669886	FC	-1.1654	H
121	O15511	ARPC5	Actin-related protein 2/3 complex subunit 5					0.00148391	T	0.00446773	0.561097	FC	-1.67461	H
1425	P61158	ACTR3	Actin-related protein 3					0.00686784	T	0.0151157	0.70398	FC	-1.36473	H
1342	P53999	SUB1	Activated RNA polymerase II transcriptional coactivator p15					0.00579536	U	0.0125088	0.467497	H	-0.74	R
306	O95433	AHSA1	Activator of 90 kDa heat shock protein ATPase homolog 1					5.74158e-06	T	0.000189158	0.242487	FC	-2.83213	H
71	O14561	NDUFAB1	Acyl carrier protein, mitochondrial					0.000246128	U	0.00187244	0.376217	H	-0.98	R
730	P13798	APEH	Acylamino-acid-releasing enzyme					1.0006e-06	T	0.000127031	0.385172	FC	-3.23413	H
2423	Q9H845	ACAD9	Acyl-CoA dehydrogenase family member 9, mitochondrial					0.00706651	U	0.0149711	0.138463	H	-0.72	R
2216	Q96CM8	ACSF2	Acyl-CoA synthetase family member 2, mitochondrial					0.00318399	U	0.00790478	0.000606436	H	-0.78	R
526	P07108	DBI	Acyl-CoA-binding protein					0.00125094	T	0.00387779	0.366804	FC	-1.70888	H
1949	Q53FZ2	ACSM3	Acyl-coenzyme A synthetase ACSM3, mitochondrial					0.00032348	X	0.0564675	only in B		0
1250	P49753	ACOT2	Acyl-coenzyme A thioesterase 2, mitochondrial					0.161972	U	0.211892	0.522547	H	-0.38	R
2673	Q9Y305	ACOT9	Acyl-coenzyme A thioesterase 9, mitochondrial					0.00246771	T	0.00667213	0.436983	FC	-1.57238	H
1953	Q53H12	AGK	Acylglycerol kinase, mitochondrial					0.308869	T	0.370087	0.631521	FC	-0.468319	H
243	O75608	LYPLA1	Acyl-protein thioesterase 1					0.00765557	T	0.0164529	0.384028	FC	-1.34244	H
302	O95372	LYPLA2	Acyl-protein thioesterase 2					0.345439	T	0.40675	0.799643	FC	-0.433302	H
1999	Q6P587	FAHD1	Acylpyruvase FAHD1, mitochondrial	26	3	184	1	0.00359708	W	0.0100521	0.136167	FC	-1.73292	H
1185	P46108	CRK	Adapter molecule crk					0.00179249	T	0.00519879	0.485594	FC	-1.63667	H
2502	Q9NVZ3	NECAP2	Adaptin ear-binding coat-associated protein 2					0.389099	T	0.451873	0.776345	FC	-0.394701	H
547	P07741	APRT	Adenine phosphoribosyltransferase					0.000131228	T	0.000830434	0.414711	FC	-2.16481	H
1372	P55263	ADK	Adenosine kinase					0.00375846	T	0.0092815	0.319021	FC	-1.48747	H
902	P23526	AHCY	Adenosylhomocysteinase					0.000319519	T	0.00144748	0.191209	FC	-1.98353	H
1353	P54819	AK2	Adenylate kinase 2, mitochondrial					0.000286053	T	0.00134759	0.319276	FC	-2.00594	H
945	P27144	AK4	Adenylate kinase 4, mitochondrial					0.313533	T	0.37439	0.789161	FC	-0.463695	H
352	P00568	AK1	Adenylate kinase isoenzyme 1					0.0177098	T	0.0327232	0.658299	FC	-1.16738	H
1019	P30566	ADSL	Adenylosuccinate lyase					9.8946e-08	T	4.06714e-05	0.381082	FC	-3.80993	H
1017	P30520	ADSS2	Adenylosuccinate synthetase isozyme 2					0.00089587	T	0.0030002	0.212876	FC	-1.77589	H
1594	Q01518	CAP1	Adenylyl cyclase-associated protein 1					0.00235173	T	0.00645859	0.683365	FC	-1.58207	H
1130	P40123	CAP2	Adenylyl cyclase-associated protein 2					0.272802	T	0.331999	1.31732	FC	0.505905	H
2060	Q8IUX7	AEBP1	Adipocyte enhancer-binding protein 1					0.0937436	T	0.133516	1.6007	FC	0.79136	H
2453	Q9HDC9	APMAP	Adipocyte plasma membrane-associated protein					0.262759	T	0.321598	0.708442	FC	-0.517019	H
1894	Q15847	ADIRF	Adipogenesis regulatory factor					0.0836435	T	0.121577	0.609181	FC	-0.819029	H
695	P12235	SLC25A4	ADP/ATP translocase 1					9.85282e-05	T	0.000707428	0.451827	FC	-2.22379	H
483	P05141	SLC25A5	ADP/ATP translocase 2					1.01236e-05	T	0.000239621	0.338953	FC	-2.70674	H
696	P12236	SLC25A6	ADP/ATP translocase 3					0.0107961	T	0.0216309	0.543377	FC	-1.27137	H
2322	Q9BRR6	ADPGK	ADP-dependent glucokinase					0.0184873	U	0.0325568	0.00207384	H	-0.62	R
2505	Q9NX46	ADPRS	ADP-ribose glycohydrolase ARH3					0.00262432	U	0.0068502	0.136542	H	-0.8	R
976	P28907	CD38	ADP-ribosyl cyclase/cyclic ADP-ribose hydrolase 1					0.0451546	U	0.0682819	0.588665	H	-0.54	R
1674	Q10588	BST1	ADP-ribosyl cyclase/cyclic ADP-ribose hydrolase 2					0.134365	T	0.182056	2.21241	FC	0.701092	H
1429	P61204	ARF3	ADP-ribosylation factor 3					4.88325e-05	T	0.000480771	0.434505	FC	-2.36978	H
811	P18085	ARF4	ADP-ribosylation factor 4					0.000506557	T	0.00196879	0.518672	FC	-1.89051	H
1566	P84085	ARF5	ADP-ribosylation factor 5					0.0694553	T	0.103737	0.66284	FC	-0.863339	H
1476	P62330	ARF6	ADP-ribosylation factor 6					0.000161188	T	0.000945287	0.46483	FC	-2.12269	H
2087	Q8N6T3	ARFGAP1	ADP-ribosylation factor GTPase-activating protein 1					0.634095	T	0.688848	1.27712	FC	0.216533	H
2086	Q8N6H7	ARFGAP2	ADP-ribosylation factor GTPase-activating protein 2					0.0229729	T	0.0404052	0.332988	FC	-1.11171	H
1136	P40616	ARL1	ADP-ribosylation factor-like protein 1					1.18579e-05	T	0.000258744	0.288813	FC	-2.67219	H
1095	P36405	ARL3	ADP-ribosylation factor-like protein 3					2.76238e-06	T	0.000164534	0.330354	FC	-2.99743	H
1836	Q15041	ARL6IP1	ADP-ribosylation factor-like protein 6-interacting protein 1					0.0363926	T	0.0595108	0.578258	FC	-1.01108	H
2207	Q96BM9	ARL8A	ADP-ribosylation factor-like protein 8A					0.208424	T	0.265086	0.546912	FC	-0.583488	H
2499	Q9NVJ2	ARL8B	ADP-ribosylation factor-like protein 8B					0.156371	T	0.207578	0.804176	FC	-0.661526	H
2611	Q9UKK9	NUDT5	ADP-sugar pyrophosphatase					0.000550258	T	0.00208462	0.271652	FC	-1.87384	H
1369	P55196	AFDN	Afadin					0.000305753	T	0.00141011	0.231918	FC	-1.99245	H
1175	P43652	AFM	Afamin					0.319388	T	0.380243	1.25892	FC	0.45796	H
2701	Q9Y4W6	AFG3L2	AFG3-like protein 2					0.140465	U	0.186908	0.525188	H	-0.4	R
138	O43488	AKR7A2	Aflatoxin B1 aldehyde reductase member 2					0.121076	T	0.16642	0.753854	FC	-0.727698	H
287	O95154	AKR7A3	Aflatoxin B1 aldehyde reductase member 3					6.986e-05	T	0.000577275	0.176255	FC	-2.29501	H
2326	Q9BSE5	AGMAT	Agmatinase, mitochondrial	53	5	293	3	0.00191507	W	0.00627869	0.0716509	FC	-1.92467	H
30	O00170	AIP	AH receptor-interacting protein					0.10398	U	0.143524	0.454698	H	-0.44	R
1613	Q02952	AKAP12	A-kinase anchor protein 12					0.39681	T	0.45911	1.23944	FC	0.388189	H
1242	P49588	AARS1	Alanine--tRNA ligase, cytoplasmic					0.00109003	T	0.0034675	0.465921	FC	-1.73651	H
337	P00325	ADH1B	Alcohol dehydrogenase 1B					0.811145	T	0.847243	0.923711	FC	-0.108443	H
338	P00326	ADH1C	Alcohol dehydrogenase 1C					0.011299	U	0.0214389	0.11191	H	-0.68	R
686	P11766	ADH5	Alcohol dehydrogenase class-3					0.689855	T	0.739357	0.948228	FC	-0.181367	H
1207	P47895	ALDH1A3	Aldehyde dehydrogenase family 1 member A3					0.216048	T	0.273165	0.457061	FC	-0.573408	H
2071	Q8IZ83	ALDH16A1	Aldehyde dehydrogenase family 16 member A1					0.250081	T	0.309197	0.728476	FC	-0.531514	H
1023	P30837	ALDH1B1	Aldehyde dehydrogenase X, mitochondrial					0.0440739	T	0.0700616	0.629739	FC	-0.968194	H
478	P05091	ALDH2	Aldehyde dehydrogenase, mitochondrial					4.28965e-05	T	0.000442103	0.381869	FC	-2.39699	H
740	P14550	AKR1A1	Aldo-keto reductase family 1 member A1					0.0492848	T	0.0769008	0.703745	FC	-0.942847	H
757	P15121	AKR1B1	Aldo-keto reductase family 1 member B1					0.65244	T	0.705757	1.08689	FC	0.204819	H
173	O60218	AKR1B10	Aldo-keto reductase family 1 member B10					0.0146468	U	0.0267201	0.00204685	H	-0.6	R
1626	Q04828	AKR1C1	Aldo-keto reductase family 1 member C1					0.814753	U	0.855813	1	H	-0.07	R
1158	P42330	AKR1C3	Aldo-keto reductase family 1 member C3					0.000700738	T	0.00249638	0.492487	FC	-1.82523	H
2212	Q96C23	GALM	Aldose 1-epimerase					0.47089	T	0.534198	1.2201	FC	0.329393	H
23	O00116	AGPS	Alkyldihydroxyacetonephosphate synthase, peroxisomal					0.000312839	T	0.00142909	0.222573	FC	-1.98781	H
1357	P55008	AIF1	Allograft inflammatory factor 1					0.376205	T	0.43909	1.28914	FC	0.405783	H
426	P02763	ORM1	Alpha-1-acid glycoprotein 1					0.520523	U	0.578981	1.19002	H	0.18	R
829	P19652	ORM2	Alpha-1-acid glycoprotein 2					0.850107	U	0.883643	1.05599	H	0.06	R
366	P01011	SERPINA3	Alpha-1-antichymotrypsin					0.266459	T	0.325698	1.33929	FC	0.512888	H
365	P01009	SERPINA1	Alpha-1-antitrypsin					0.208849	T	0.265505	1.27662	FC	0.582919	H
455	P04217	A1BG	Alpha-1B-glycoprotein					0.273036	U	0.331417	1.31733	H	0.3	R
588	P08697	SERPINF2	Alpha-2-antiplasmin					0.00928807	T	0.0191592	1.67824	FC	1.30258	H
427	P02765	AHSG	Alpha-2-HS-glycoprotein					0.00480387	T	0.0113321	1.80554	FC	1.43769	H
368	P01023	A2M	Alpha-2-macroglobulin					0.0717256	T	0.106786	1.50668	FC	0.855738	H
1018	P30533	LRPAP1	Alpha-2-macroglobulin receptor-associated protein					0.0906524	T	0.129975	0.614973	FC	-0.799539	H
703	P12814	ACTN1	Alpha-actinin-1					0.000334281	T	0.0014867	2.18466	FC	1.97439	H
153	O43707	ACTN4	Alpha-actinin-4					0.738485	T	0.78336	0.968309	FC	-0.151634	H
1083	P35611	ADD1	Alpha-adducin					0.000277187	T	0.00131758	0.38931	FC	-2.01232	H
1239	P49419	ALDH7A1	Alpha-aminoadipic semialdehyde dehydrogenase					6.72545e-05	T	0.000565789	0.365083	FC	-2.30292	H
1427	P61163	ACTR1A	Alpha-centractin					1.83244e-05	T	0.00029469	0.446623	FC	-2.57791	H
402	P02511	CRYAB	Alpha-crystallin B chain					0.0198546	T	0.0359623	2.09975	FC	1.14302	H
158	O43768	ENSA	Alpha-endosulfine					0.00906028	T	0.0188424	0.385018	FC	-1.30771	H
517	P06733	ENO1	Alpha-enolase					0.00847832	T	0.0178717	0.726868	FC	-1.32142	H
504	P06280	GLA	Alpha-galactosidase A					0.0514869	T	0.0797576	0.512696	FC	-0.932863	H
2520	Q9NZD4	AHSP	Alpha-hemoglobin-stabilizing protein					0.505995	T	0.568481	0.760476	FC	-0.303499	H
1902	Q16352	INA	Alpha-internexin					0.00032348	X	0.0564675	only in A		0
1920	Q16706	MAN2A1	Alpha-mannosidase 2					0.0926568	T	0.132294	0.393636	FC	-0.794208	H
2585	Q9UHK6	AMACR	Alpha-methylacyl-CoA racemase					0.000510047	U	0.00242604	0.000338683	H	-0.9	R
791	P17050	NAGA	Alpha-N-acetylgalactosaminidase					0.114447	T	0.158243	1.67055	FC	0.741908	H
2496	Q9NVD7	PARVA	Alpha-parvin					0.0724654	T	0.107417	1.31743	FC	0.853308	H
1356	P54920	NAPA	Alpha-soluble NSF attachment protein					0.000203206	T	0.00108935	0.561241	FC	-2.07542	H
1115	P37840	SNCA	Alpha-synuclein					0.18831	T	0.242485	1.28337	FC	0.611554	H
831	P19801	AOC1	Amiloride-sensitive amine oxidase [copper-containing]					0.118102	T	0.162573	0.374323	FC	-0.733988	H
862	P21397	MAOA	Amine oxidase [flavin-containing] A					0.222549	T	0.280376	1.60215	FC	0.56503	H
948	P27338	MAOB	Amine oxidase [flavin-containing] B					0.159897	T	0.211498	0.695483	FC	-0.655621	H
1686	Q12904	AIMP1	Aminoacyl tRNA synthase complex-interacting multifunctional protein 1					0.0154747	T	0.0292626	0.531565	FC	-1.19595	H
1704	Q13155	AIMP2	Aminoacyl tRNA synthase complex-interacting multifunctional protein 2					0.000727556	T	0.00257549	0.456159	FC	-1.81768	H
1617	Q03154	ACY1	Aminoacylase-1					0.574978	T	0.632	1.19474	FC	0.255415	H
2413	Q9H4A4	RNPEP	Aminopeptidase B					1.80836e-05	T	0.00029469	0.459116	FC	-2.58076	H
758	P15144	ANPEP	Aminopeptidase N					0.49618	T	0.558577	0.804393	FC	-0.310631	H
1592	Q01432	AMPD3	AMP deaminase 3					0.556585	T	0.615173	1.21547	FC	0.267917	H
476	P05067	APP	Amyloid-beta precursor protein					0.000202827	U	0.00187244	0.00080838	H	-0.98	R
1984	Q6FI81	CIAPIN1	Anamorsin					0.0487411	T	0.0762227	0.505698	FC	-0.945375	H
1759	Q13685	AAMP	Angio-associated migratory cell protein					0.00469996	U	0.0107159	0.000865117	H	-0.71	R
367	P01019	AGT	Angiotensinogen					0.260428	T	0.319585	1.24977	FC	0.519645	H
774	P16157	ANK1	Ankyrin-1					0.715863	T	0.761756	1.0995	FC	0.165369	H
448	P04083	ANXA1	Annexin A1					0.335563	T	0.396291	1.15453	FC	0.442491	H
1283	P50995	ANXA11	Annexin A11					9.02866e-08	T	4.06714e-05	0.478049	FC	-3.83388	H
947	P27216	ANXA13	Annexin A13					0.532105	U	0.591628	0.87357	H	-0.17	R
534	P07355	ANXA2	Annexin A2					0.00217096	T	0.00605822	0.677692	FC	-1.59817	H
700	P12429	ANXA3	Annexin A3					0.128537	T	0.175038	0.573092	FC	-0.712474	H
612	P09525	ANXA4	Annexin A4					4.88861e-05	T	0.000480771	0.386899	FC	-2.36955	H
592	P08758	ANXA5	Annexin A5					0.0964969	T	0.136949	1.19468	FC	0.784269	H
560	P08133	ANXA6	Annexin A6					0.240879	T	0.299411	1.12815	FC	0.542386	H
840	P20073	ANXA7	Annexin A7					0.0130261	T	0.0252002	0.628153	FC	-1.23218	H
733	P13928	ANXA8L1	Annexin A8					0.670405	U	0.727162	1	H	0.08	R
331	O95994	AGR2	Anterior gradient protein 2 homolog					0.00869795	T	0.0182465	0.220743	FC	-1.31614	H
2121	Q8TD06	AGR3	Anterior gradient protein 3					0.0034187	T	0.0085636	0.358433	FC	-1.50663	H
1619	Q03518	TAP1	Antigen peptide transporter 1					0.000439639	U	0.00215423	0.183263	H	-0.94	R
1620	Q03519	TAP2	Antigen peptide transporter 2					0.000487149	T	0.00191635	0.225852	FC	-1.89838	H
364	P01008	SERPINC1	Antithrombin-III					0.7863	T	0.824685	1.02742	FC	0.123071	H
1672	Q10567	AP1B1	AP-1 complex subunit beta-1					9.38111e-06	T	0.000234217	0.388672	FC	-2.72345	H
155	O43747	AP1G1	AP-1 complex subunit gamma-1					0.00288224	T	0.00757301	0.450391	FC	-1.54109	H
2359	Q9BXS5	AP1M1	AP-1 complex subunit mu-1					0.249978	T	0.309197	0.727045	FC	-0.531633	H
2742	Q9Y6Q5	AP1M2	AP-1 complex subunit mu-2					0.0279269	T	0.047474	0.222279	FC	-1.06937	H
320	O95782	AP2A1	AP-2 complex subunit alpha-1					0.0779434	T	0.114216	0.782677	FC	-0.835967	H
285	O94973	AP2A2	AP-2 complex subunit alpha-2					0.00157049	T	0.0046614	0.498248	FC	-1.66322	H
1512	P63010	AP2B1	AP-2 complex subunit beta					0.000514263	T	0.00198389	0.491335	FC	-1.88746	H
2221	Q96CW1	AP2M1	AP-2 complex subunit mu					0.000287754	T	0.00135154	0.468156	FC	-2.00474	H
34	O00203	AP3B1	AP-3 complex subunit beta-1					0.103285	T	0.145396	0.700061	FC	-0.767509	H
73	O14617	AP3D1	AP-3 complex subunit delta-1					0.00553712	T	0.0127706	0.540122	FC	-1.40877	H
2667	Q9Y2T2	AP3M1	AP-3 complex subunit mu-1					0.782278	T	0.821701	1.12947	FC	0.125452	H
406	P02647	APOA1	Apolipoprotein A-I					0.00522981	T	0.0121521	1.69253	FC	1.4204	H
408	P02652	APOA2	Apolipoprotein A-II					0.000538869	T	0.00205609	1.77	FC	1.87805	H
514	P06727	APOA4	Apolipoprotein A-IV					0.861027	T	0.889425	1.03544	FC	0.0794213	H
1669	Q0VD83	APOBR	Apolipoprotein B receptor					0.937843	T	0.959837	0.975236	FC	-0.035365	H
449	P04114	APOB	Apolipoprotein B-100					0.05762	T	0.0882306	1.54963	FC	0.90697	H
409	P02654	APOC1	Apolipoprotein C-I					0.0370905	T	0.060475	1.99242	FC	1.00686	H
410	P02655	APOC2	Apolipoprotein C-II					0.782661	T	0.821794	1.1042	FC	0.125225	H
411	P02656	APOC3	Apolipoprotein C-III					0.00802291	T	0.0171577	2.17497	FC	1.3328	H
477	P05090	APOD	Apolipoprotein D					0.342863	T	0.403887	1.21042	FC	0.435681	H
407	P02649	APOE	Apolipoprotein E					0.0310671	T	0.0520518	1.50221	FC	1.04605	H
81	O14791	APOL1	Apolipoprotein L1					0.373774	T	0.436617	1.49881	FC	0.4079	H
2313	Q9BQE5	APOL2	Apolipoprotein L2					0.472676	U	0.534055	0.736493	H	-0.2	R
2376	Q9BZZ5	API5	Apoptosis inhibitor 5					0.000231334	T	0.00117904	0.18055	FC	-2.04904	H
1650	Q07812	BAX	Apoptosis regulator BAX					0.886365	T	0.912165	1.02973	FC	0.0648216	H
2623	Q9ULZ3	PYCARD	Apoptosis-associated speck-like protein containing a CARD					0.000511199	T	0.00197753	0.32733	FC	-1.88867	H
325	O95831	AIFM1	Apoptosis-inducing factor 1, mitochondrial					0.000271836	T	0.00130903	0.50333	FC	-2.01628	H
2613	Q9UKV3	ACIN1	Apoptotic chromatin condensation inducer in the nucleus					0.000440986	U	0.00215705	0.000514159	H	-0.92	R
769	P16050	ALOX15	Arachidonate 15-lipoxygenase					0.0890538	T	0.127946	0.529309	FC	-0.803865	H
623	P09917	ALOX5	Arachidonate 5-lipoxygenase					0.553508	T	0.612742	1.327	FC	0.270029	H
1784	Q14161	GIT2	ARF GTPase-activating protein GIT2					0.0168402	U	0.0304678	0.244077	H	-0.64	R
1331	P53367	ARFIP1	Arfaptin-1					0.000314399	T	0.00143249	0.190113	FC	-1.9868	H
1344	P54136	RARS1	Arginine--tRNA ligase, cytoplasmic					0.180964	T	0.234431	1.82089	FC	0.622402	H
461	P04424	ASL	Argininosuccinate lyase					0.0756616	U	0.10826	0.355328	H	-0.48	R
363	P00966	ASS1	Argininosuccinate synthase					0.0021669	T	0.0060582	0.37158	FC	-1.59854	H
2577	Q9UH62	ARMCX3	Armadillo repeat-containing X-linked protein 3					0.00681491	U	0.0146079	0.00128687	H	-0.68	R
160	O43776	NARS1	Asparagine--tRNA ligase, cytoplasmic					0.00289167	T	0.00758351	0.469372	FC	-1.54044	H
793	P17174	GOT1	Aspartate aminotransferase, cytoplasmic					0.201646	T	0.257285	0.799526	FC	-0.592696	H
350	P00505	GOT2	Aspartate aminotransferase, mitochondrial	32	16	393	16	5.7209e-05	W	0.00115786	0.270325	FC	-2.99217	H
749	P14868	DARS1	Aspartate--tRNA ligase, cytoplasmic					8.8336e-05	T	0.000666504	0.335043	FC	-2.24635	H
2003	Q6PI48	DARS2	Aspartate--tRNA ligase, mitochondrial					0.000220636	U	0.00187244	0.0078947	H	-0.98	R
2618	Q9ULA0	DNPEP	Aspartyl aminopeptidase					1.50486e-05	T	0.000289132	0.46633	FC	-2.62042	H
1679	Q12797	ASPH	Aspartyl/asparaginyl beta-hydroxylase					0.0648763	T	0.097524	0.640089	FC	-0.879366	H
2356	Q9BXN1	ASPN	Asporin					0.239186	T	0.297704	1.4316	FC	0.544421	H
1849	Q15121	PEA15	Astrocytic phosphoprotein PEA-15					0.209201	T	0.265711	0.861931	FC	-0.582448	H
2545	Q9UBB4	ATXN10	Ataxin-10					0.00113006	T	0.00355834	0.301841	FC	-1.72928	H
2139	Q8WWM7	ATXN2L	Ataxin-2-like protein					0.030621	T	0.0514278	0.322735	FC	-1.04922	H
1982	Q6DD88	ATL3	Atlastin-3					0.0723358	T	0.107351	1.282	FC	0.853732	H
911	P24539	ATP5PB	ATP synthase F(0) complex subunit B1, mitochondrial					0.0230288	T	0.040427	0.70622	FC	-1.11119	H
924	P25705	ATP5F1A	ATP synthase subunit alpha, mitochondrial					0.000113456	T	0.00076727	0.491144	FC	-2.19472	H
510	P06576	ATP5F1B	ATP synthase subunit beta, mitochondrial					7.14475e-05	T	0.000581551	0.514001	FC	-2.29034	H
262	O75947	ATP5PD	ATP synthase subunit d, mitochondrial					8.40219e-05	T	0.000643366	0.544901	FC	-2.25672	H
997	P30049	ATP5F1D	ATP synthase subunit delta, mitochondrial					0.00100798	U	0.00333564	0.402823	H	-0.88	R
264	O75964	ATP5MG	ATP synthase subunit g, mitochondrial					0.000143959	T	0.000879447	0.485453	FC	-2.14582	H
1097	P36542	ATP5F1C	ATP synthase subunit gamma, mitochondrial					5.75728e-05	T	0.000536003	0.460178	FC	-2.33532	H
1211	P48047	ATP5PO	ATP synthase subunit O, mitochondrial					2.40369e-06	T	0.000163732	0.277646	FC	-3.02933	H
821	P18859	ATP5PF	ATP synthase-coupling factor 6, mitochondrial					2.46854e-05	T	0.000355393	0.503365	FC	-2.51405	H
150	O43681	GET3	ATPase ASNA1					0.00980534	T	0.0200339	0.680216	FC	-1.29135	H
2498	Q9NVI7	ATAD3A	ATPase family AAA domain-containing protein 3A					2.70597e-05	T	0.000369199	0.161785	FC	-2.49448	H
1974	Q5T9A4	ATAD3B	ATPase family AAA domain-containing protein 3B					0.00491056	X	0.249367	only in B		0
2596	Q9UII2	ATP5IF1	ATPase inhibitor, mitochondrial					0.156955	T	0.208155	0.649895	FC	-0.66054	H
968	P28288	ABCD3	ATP-binding cassette sub-family D member 3					0.0116813	T	0.0231554	0.312301	FC	-1.25496	H
1430	P61221	ABCE1	ATP-binding cassette sub-family E member 1					0.003196	T	0.008152	0.383475	FC	-1.52024	H
2104	Q8NE71	ABCF1	ATP-binding cassette sub-family F member 1					0.00220222	U	0.00582462	0.269493	H	-0.82	R
2572	Q9UG63	ABCF2	ATP-binding cassette sub-family F member 2					0.00200522	T	0.0057132	0.348309	FC	-1.61413	H
1333	P53396	ACLY	ATP-citrate synthase					9.74327e-05	T	0.000702473	0.365041	FC	-2.2261	H
804	P17858	PFKL	ATP-dependent 6-phosphofructokinase, liver type					1.99741e-06	T	0.00015809	0.398752	FC	-3.07205	H
566	P08237	PFKM	ATP-dependent 6-phosphofructokinase, muscle type					0.0725872	T	0.107495	0.654208	FC	-0.85291	H
1597	Q01813	PFKP	ATP-dependent 6-phosphofructokinase, platelet type					0.892743	T	0.91839	0.976545	FC	-0.0611587	H
1922	Q16740	CLPP	ATP-dependent Clp protease proteolytic subunit, mitochondrial					0.00131495	U	0.00397472	0.116416	H	-0.86	R
1183	P46063	RECQL	ATP-dependent DNA helicase Q1					0.00870189	T	0.0182465	0.515325	FC	-1.31605	H
1656	Q08211	DHX9	ATP-dependent RNA helicase A	12	5	98	4	0.00030147	W	0.00207902	0.268922	FC	-2.39248	H
2146	Q92499	DDX1	ATP-dependent RNA helicase DDX1					0.00170625	U	0.00484797	0.424332	H	-0.84	R
2500	Q9NVP1	DDX18	ATP-dependent RNA helicase DDX18					0.000110671	U	0.00187244	0.000307193	H	-1	R
2493	Q9NUU7	DDX19A	ATP-dependent RNA helicase DDX19A					0.0395737	T	0.0637792	1.73256	FC	0.992397	H
2627	Q9UMR2	DDX19B	ATP-dependent RNA helicase DDX19B					0.000972242	T	0.00319843	0.482508	FC	-1.75946	H
24	O00148	DDX39A	ATP-dependent RNA helicase DDX39A					0.850107	U	0.883643	0.926672	H	-0.06	R
60	O00571	DDX3X	ATP-dependent RNA helicase DDX3X					8.06324e-06	T	0.000230565	0.517938	FC	-2.75678	H
2056	Q86XP3	DDX42	ATP-dependent RNA helicase DDX42					0.285667	T	0.345248	0.539923	FC	-0.492103	H
2111	Q8NI60	COQ8A	Atypical kinase COQ8A, mitochondrial					0.518947	U	0.578981	0.645623	H	-0.18	R
841	P20160	AZU1	Azurocidin					0.57075	U	0.627107	0.628116	H	-0.16	R
794	P17213	BPI	Bactericidal permeability-increasing protein					0.857349	T	0.88688	0.920111	FC	-0.0815476	H
323	O95816	BAG2	BAG family molecular chaperone regulator 2					0.00709583	T	0.0154954	3.94554	FC	1.35804	H
324	O95817	BAG3	BAG family molecular chaperone regulator 3					0.00682199	T	0.0150504	2.45446	FC	1.36611	H
415	P02730	SLC4A1	Band 3 anion transport protein					0.52383	T	0.585222	1.09373	FC	0.29074	H
2414	Q9H4G0	EPB41L1	Band 4.1-like protein 1					0.421178	U	0.486899	1.36504	H	0.22	R
140	O43491	EPB41L2	Band 4.1-like protein 2					3.82006e-05	T	0.000419361	0.330845	FC	-2.42141	H
2659	Q9Y2J2	EPB41L3	Band 4.1-like protein 3					0.0131722	T	0.0254416	2.09841	FC	1.22984	H
238	O75531	BANF1	Barrier-to-autointegration factor					0.000439639	U	0.00215423	0.396909	H	-0.94	R
1278	P50895	BCAM	Basal cell adhesion molecule					0.0182147	T	0.0334695	0.326856	FC	-1.1614	H
1573	P98160	HSPG2	Basement membrane-specific heparan sulfate proteoglycan core protein					0.00289752	T	0.00759171	1.75819	FC	1.54003	H
2025	Q7L1Q6	BZW1	Basic leucine zipper and W2 domain-containing protein 1					6.07726e-05	T	0.000540983	0.410903	FC	-2.32403	H
2734	Q9Y6E2	BZW2	Basic leucine zipper and W2 domain-containing protein 2					0.000178614	U	0.00187244	0.100861	H	-1	R
1084	P35613	BSG	Basigin					0.00170625	U	0.00484797	0.427962	H	-0.84	R
1295	P51572	BCAP31	B-cell receptor-associated protein 31					0.00223706	T	0.00619121	0.61648	FC	-1.59213	H
2511	Q9NYF8	BCLAF1	Bcl-2-associated transcription factor 1					6.08185e-05	T	0.000540983	0.241677	FC	-2.32388	H
1765	Q13884	SNTB1	Beta-1-syntrophin					0.0869993	T	0.125369	0.551002	FC	-0.809526	H
421	P02749	APOH	Beta-2-glycoprotein 1					0.190226	T	0.244501	1.27521	FC	0.60878	H
1448	P61769	B2M	Beta-2-microglobulin					0.0198786	T	0.0359686	0.604207	FC	-1.14276	H
1727	Q13425	SNTB2	Beta-2-syntrophin					0.0756616	U	0.10826	2.02369	H	0.48	R
1956	Q562R1	ACTBL2	Beta-actin-like protein 2					0.443631	U	0.508229	0.653588	H	-0.21	R
918	P25098	GRK2	Beta-adrenergic receptor kinase 1					0.536213	T	0.597404	0.819433	FC	-0.282022	H
1237	P49407	ARRB1	Beta-arrestin-1					0.166939	T	0.219005	0.600384	FC	-0.644139	H
2145	Q8WYA6	CTNNBL1	Beta-catenin-like protein 1					0.00628452	T	0.0141326	0.309532	FC	-1.38291	H
1151	P42025	ACTR1B	Beta-centractin					0.10375	T	0.145809	0.487533	FC	-0.766397	H
776	P16278	GLB1	Beta-galactosidase					0.0274253	T	0.0469355	0.399544	FC	-1.07333	H
565	P08236	GUSB	Beta-glucuronidase					0.143462	T	0.192917	0.696808	FC	-0.684127	H
523	P06865	HEXA	Beta-hexosaminidase subunit alpha					0.0383791	T	0.062249	0.56373	FC	-0.999246	H
543	P07686	HEXB	Beta-hexosaminidase subunit beta					0.00370961	T	0.0091771	0.523898	FC	-1.49012	H
1383	P55957	BID	BH3-interacting domain death agonist					0.000489457	T	0.00192272	0.307076	FC	-1.89742	H
130	O43252	PAPSS1	Bifunctional 3'-phosphoadenosine 5'-phosphosulfate synthase 1					0.0222111	T	0.0392879	0.336701	FC	-1.11897	H
300	O95340	PAPSS2	Bifunctional 3'-phosphoadenosine 5'-phosphosulfate synthase 2					0.0263043	T	0.0453225	0.343629	FC	-1.08241	H
1695	Q13057	COASY	Bifunctional coenzyme A synthase					0.000951316	T	0.00313698	0.299765	FC	-1.76383	H
1062	P34913	EPHX2	Bifunctional epoxide hydrolase 2					0.167859	T	0.220108	0.489614	FC	-0.642669	H
548	P07814	EPRS1	Bifunctional glutamate/proline--tRNA ligase					3.06489e-05	T	0.000375043	0.357343	FC	-2.46801	H
1035	P31939	ATIC	Bifunctional purine biosynthesis protein PURH					8.75901e-06	T	0.000234217	0.264397	FC	-2.73854	H
2645	Q9Y223	GNE	Bifunctional UDP-N-acetylglucosamine 2-epimerase/N-acetylmannosamine kinase					0.485759	T	0.548393	0.706886	FC	-0.318292	H
867	P21810	BGN	Biglycan					0.0109462	T	0.0218533	2.25212	FC	1.2685	H
1328	P53004	BLVRA	Biliverdin reductase A					0.488675	T	0.55124	0.899879	FC	-0.316139	H
1276	P50583	NUDT2	Bis(5'-nucleosyl)-tetraphosphatase [asymmetrical]					0.000754541	U	0.00282438	0.0955965	H	-0.9	R
546	P07738	BPGM	Bisphosphoglycerate mutase					0.241322	U	0.298103	1.30839	H	0.32	R
1764	Q13867	BLMH	Bleomycin hydrolase					0.0602217	T	0.0917617	0.616659	FC	-0.896731	H
2403	Q9H3K6	BOLA2	BolA-like protein 2					9.56759e-06	T	0.000234217	0.20068	FC	-2.71913	H
723	P13727	PRG2	Bone marrow proteoglycan					0.272314	U	0.331417	2.03141	H	0.3	R
1555	P80723	BASP1	Brain acid soluble protein 1					0.40877	T	0.470996	1.23303	FC	0.378252	H
117	O15382	BCAT2	Branched-chain-amino-acid aminotransferase, mitochondrial					0.0132876	T	0.0256301	0.398663	FC	-1.22801	H
223	O75363	BCAS1	Breast carcinoma-amplified sequence 1					0.9737	T	0.987847	1.01028	FC	0.0149503	H
2732	Q9Y6D6	ARFGEF1	Brefeldin A-inhibited guanine nucleotide-exchange protein 1					0.0305764	U	0.0503834	0.125314	H	-0.58	R
1975	Q5VW32	BROX	BRO1 domain-containing protein BROX					0.00685289	T	0.0150947	0.332113	FC	-1.36518	H
2222	Q96CX2	KCTD12	BTB/POZ domain-containing protein KCTD12					0.151539	T	0.202221	1.22977	FC	0.669798	H
2308	Q9BQ13	KCTD14	BTB/POZ domain-containing protein KCTD14					0.300986	U	0.36446	1	H	-0.26	R
149	O43670	ZNF207	BUB3-interacting and GLEBS motif-containing protein ZNF207	23	3	47	3	0.00142083	W	0.00512697	0.162792	FC	-1.99599	H
1767	Q13895	BYSL	Bystin					0.00793165	U	0.0162651	0.00126565	H	-0.68	R
683	P11586	MTHFD1	C-1-tetrahydrofolate synthase, cytoplasmic					8.85591e-07	T	0.000123673	0.318966	FC	-3.2632	H
441	P04003	C4BPA	C4b-binding protein alpha chain					0.148315	T	0.198297	1.50466	FC	0.67544	H
254	O75844	ZMPSTE24	CAAX prenyl protease 1 homolog					0.000192407	T	0.00104755	0.321814	FC	-2.08654	H
957	P27708	CAD	CAD protein					0.000132013	T	0.000830434	0.231952	FC	-2.16359	H
704	P12830	CDH1	Cadherin-1					0.000125407	T	0.000812283	0.127244	FC	-2.17413	H
1375	P55290	CDH13	Cadherin-13					0.054025	T	0.0833197	1.71811	FC	0.921826	H
1683	Q12864	CDH17	Cadherin-17					0.00199657	T	0.00570374	0.15584	FC	-1.615	H
1513	P63098	PPP3R1	Calcineurin subunit B type 1					0.754406	T	0.797221	1.10787	FC	0.142057	H
2066	Q8IWX8	CHERP	Calcium homeostasis endoplasmic reticulum protein					0.000202827	U	0.00187244	0.000408912	H	-0.98	R
2624	Q9UM00	TMCO1	Calcium load-activated calcium channel					0.00211793	T	0.00594511	0.371735	FC	-1.60314	H
2105	Q8NE86	MCU	Calcium uniporter protein, mitochondrial					0.00013173	U	0.00187244	0.000313035	H	-1	R
1741	Q13557	CAMK2D	Calcium/calmodulin-dependent protein kinase type II subunit delta					0.0756616	U	0.10826	0.580019	H	-0.48	R
1740	Q13555	CAMK2G	Calcium/calmodulin-dependent protein kinase type II subunit gamma					0.212294	U	0.267089	1.9658	H	0.34	R
19	A8K7I4	CLCA1	Calcium-activated chloride channel regulator 1					0.0376353	U	0.0590205	0.349444	H	-0.56	R
248	O75746	SLC25A12	Calcium-binding mitochondrial carrier protein Aralar1					0.0312315	T	0.0522645	0.546918	FC	-1.04489	H
2600	Q9UJS0	SLC25A13	Calcium-binding mitochondrial carrier protein Aralar2					0.00282725	T	0.00744953	0.465526	FC	-1.54498	H
1988	Q6NUK1	SLC25A24	Calcium-binding mitochondrial carrier protein SCaMC-1					3.73714e-05	T	0.000415069	0.363019	FC	-2.42604	H
2678	Q9Y376	CAB39	Calcium-binding protein 39					0.000166991	T	0.00095575	0.507351	FC	-2.11546	H
2432	Q9H9S4	CAB39L	Calcium-binding protein 39-like					0.18004	U	0.234211	3.38688	H	0.36	R
2669	Q9Y2V2	CARHSP1	Calcium-regulated heat-stable protein 1					0.00167518	T	0.00490975	0.367921	FC	-1.65026	H
2441	Q9HB71	CACYBP	Calcyclin-binding protein					5.05142e-05	T	0.000493308	0.261772	FC	-2.36268	H
1635	Q05682	CALD1	Caldesmon					0.000912779	T	0.00304223	2.18289	FC	1.77213	H
642	P0DP25	CALM2	Calmodulin-3					5.81314e-07	T	0.000101476	0.610393	FC	-3.36449	H
951	P27482	CALML3	Calmodulin-like protein 3					1	U	1	1	H	-0.01	R
960	P27824	CANX	Calnexin					0.00213139	T	0.00597688	0.546323	FC	-1.60187	H
466	P04632	CAPNS1	Calpain small subunit 1					0.000201145	T	0.00108247	0.547312	FC	-2.07749	H
538	P07384	CAPN1	Calpain-1 catalytic subunit					0.000547241	T	0.00207761	0.55677	FC	-1.87495	H
800	P17655	CAPN2	Calpain-2 catalytic subunit					0.251554	T	0.310332	0.851417	FC	-0.529801	H
851	P20810	CAST	Calpastatin					0.186618	T	0.240639	0.78106	FC	-0.614022	H
1307	P51911	CNN1	Calponin-1					0.0198838	T	0.0359686	2.57781	FC	1.1427	H
2280	Q99439	CNN2	Calponin-2					0.164253	T	0.21609	0.731921	FC	-0.648472	H
1870	Q15417	CNN3	Calponin-3					0.142505	T	0.191722	1.37135	FC	0.685869	H
958	P27797	CALR	Calreticulin					0.0207988	T	0.0371664	0.649942	FC	-1.13308	H
168	O43852	CALU	Calumenin					0.0462286	T	0.0728237	1.57903	FC	0.957398	H
799	P17612	PRKACA	cAMP-dependent protein kinase catalytic subunit alpha					0.559501	T	0.617537	0.900627	FC	-0.26592	H
887	P22694	PRKACB	cAMP-dependent protein kinase catalytic subunit beta					0.0542659	T	0.083645	1.59793	FC	0.920803	H
656	P10644	PRKAR1A	cAMP-dependent protein kinase type I-alpha regulatory subunit					0.499388	T	0.561736	1.10115	FC	0.308291	H
732	P13861	PRKAR2A	cAMP-dependent protein kinase type II-alpha regulatory subunit					0.401761	T	0.463493	1.36474	FC	0.384053	H
1030	P31323	PRKAR2B	cAMP-dependent protein kinase type II-beta regulatory subunit					0.088973	U	0.124687	0.711846	H	-0.46	R
1802	Q14444	CAPRIN1	Caprin-1					0.000294063	T	0.00137115	0.363323	FC	-2.00035	H
361	P00915	CA1	Carbonic anhydrase 1					0.0756616	U	0.10826	1.34593	H	0.48	R
362	P00918	CA2	Carbonic anhydrase 2					0.867761	T	0.894338	0.96592	FC	-0.0755332	H
773	P16152	CBR1	Carbonyl reductase [NADPH] 1					0.631306	T	0.686619	1.0969	FC	0.218328	H
252	O75828	CBR3	Carbonyl reductase [NADPH] 3					0.956883	U	0.983287	1	H	-0.02	R
2083	Q8N4T8	CBR4	Carbonyl reductase family member 4					0.0127834	U	0.0241243	0.00169182	H	-0.66	R
2226	Q96DG6	CMBL	Carboxymethylenebutenolidase homolog					0.333002	T	0.393599	0.811143	FC	-0.444904	H
752	P15085	CPA1	Carboxypeptidase A1					0.0398056	T	0.064079	0.476986	FC	-0.991089	H
753	P15086	CPB1	Carboxypeptidase B					0.0443481	U	0.0682819	0.0570063	H	-0.54	R
2250	Q96IY4	CPB2	Carboxypeptidase B2					0.0890106	T	0.127946	2.11346	FC	0.803983	H
720	P13688	CEACAM1	Carcinoembryonic antigen-related cell adhesion molecule 1					0.0133068	U	0.0250275	0.0264526	H	-0.66	R
516	P06731	CEACAM5	Carcinoembryonic antigen-related cell adhesion molecule 5	26	4	237	3	0.0035935	W	0.0100521	0.057928	FC	-1.7433	H
1131	P40199	CEACAM6	Carcinoembryonic antigen-related cell adhesion molecule 6					0.0317349	U	0.0513234	0.031264	H	-0.56	R
1043	P31997	CEACAM8	Carcinoembryonic antigen-related cell adhesion molecule 8	41	25	516	25	0.114959	W	0.160219	2.12714	FC	0.763471	H
1268	P50416	CPT1A	Carnitine O-palmitoyltransferase 1, liver isoform					0.00558022	T	0.0128382	0.346901	FC	-1.40719	H
906	P23786	CPT2	Carnitine O-palmitoyltransferase 2, mitochondrial					0.00726293	T	0.0157495	0.538173	FC	-1.35326	H
1248	P49747	COMP	Cartilage oligomeric matrix protein					0.821957	T	0.856294	1.12779	FC	0.102116	H
247	O75718	CRTAP	Cartilage-associated protein					0.00963921	T	0.0197668	2.68737	FC	1.29489	H
1224	P48729	CSNK1A1	Casein kinase I isoform alpha					0.00131495	U	0.00397472	0.180773	H	-0.86	R
1535	P68400	CSNK2A1	Casein kinase II subunit alpha					0.00728456	U	0.0149711	0.263583	H	-0.72	R
830	P19784	CSNK2A2	Casein kinase II subunit alpha'					0.128295	T	0.174835	1.99882	FC	0.712955	H
1528	P67870	CSNK2B	Casein kinase II subunit beta					5.99567e-05	T	0.000540983	0.27182	FC	-2.32685	H
2387	Q9H078	CLPB	Caseinolytic peptidase B protein homolog					0.00262432	U	0.0068502	0.0811106	H	-0.8	R
983	P29466	CASP1	Caspase-1					0.0113297	U	0.0214389	0.444904	H	-0.68	R
1038	P31944	CASP14	Caspase-14					1	U	1	1	H	0.01	R
1160	P42574	CASP3	Caspase-3					0.509802	T	0.572068	1.30792	FC	0.300755	H
1371	P55212	CASP6	Caspase-6					0.000240866	U	0.00187244	0.0676941	H	-0.98	R
443	P04040	CAT	Catalase					0.367824	T	0.430386	0.888479	FC	-0.413123	H
870	P21964	COMT	Catechol O-methyltransferase					0.000601325	T	0.00223041	0.263727	FC	-1.85599	H
1065	P35221	CTNNA1	Catenin alpha-1					0.00220222	U	0.00582462	0.392757	H	-0.82	R
933	P26232	CTNNA2	Catenin alpha-2					0.00817018	U	0.0167175	0.00122366	H	-0.63	R
1066	P35222	CTNNB1	Catenin beta-1					8.11709e-06	T	0.000230565	0.103291	FC	-2.75531	H
194	O60716	CTNND1	Catenin delta-1					2.96949e-05	T	0.000374453	0.244844	FC	-2.47472	H
1258	P49913	CAMP	Cathelicidin antimicrobial peptide					0.677585	U	0.727883	1.26828	H	0.12	R
549	P07858	CTSB	Cathepsin B					0.43023	T	0.493054	0.81404	FC	-0.360879	H
533	P07339	CTSD	Cathepsin D					0.000369908	T	0.00159278	0.527153	FC	-1.95392	H
573	P08311	CTSG	Cathepsin G					0.0451906	T	0.0715518	2.16381	FC	0.96254	H
544	P07711	CTSL	Cathepsin L1					0.426507	T	0.489615	1.39545	FC	0.363853	H
925	P25774	CTSS	Cathepsin S					0.00203873	T	0.00578089	0.379869	FC	-1.6108	H
2557	Q9UBR2	CTSZ	Cathepsin Z					0.0644759	T	0.0970788	0.700774	FC	-0.880815	H
847	P20645	M6PR	Cation-dependent mannose-6-phosphate receptor					0.0295447	T	0.0497999	0.592425	FC	-1.05707	H
685	P11717	IGF2R	Cation-independent mannose-6-phosphate receptor					0.316685	T	0.377186	0.767459	FC	-0.460598	H
1992	Q6NZI2	CAVIN1	Caveolae-associated protein 1					0.00528198	T	0.012253	1.71512	FC	1.41838	H
322	O95810	CAVIN2	Caveolae-associated protein 2					0.850107	U	0.883643	1.06761	H	0.06	R
2190	Q969G5	CAVIN3	Caveolae-associated protein 3					0.0382496	T	0.062075	1.55083	FC	1	H
1616	Q03135	CAV1	Caveolin-1					0.0205324	T	0.0368318	2.06641	FC	1.13584	H
15	A5YKK6	CNOT1	CCR4-NOT transcription complex subunit 1					0.00120739	U	0.00396733	0.0207839	H	-0.86	R
2015	Q6YHK3	CD109	CD109 antigen					0.0519465	T	0.0803797	1.71947	FC	0.930829	H
1218	P48509	CD151	CD151 antigen					0.155477	T	0.206784	1.29828	FC	0.66304	H
2711	Q9Y5K6	CD2AP	CD2-associated protein					0.0194162	T	0.0353747	0.490947	FC	-1.14779	H
770	P16070	CD44	CD44 antigen					7.20973e-05	T	0.000581611	3.15831	FC	2.28846	H
170	O43866	CD5L	CD5 antigen-like					0.00334608	T	0.00842706	2.45527	FC	1.51097	H
734	P13987	CD59	CD59 glycoprotein					0.724762	T	0.769681	1.03263	FC	0.159947	H
1400	P60033	CD81	CD81 antigen					0.783494	T	0.822359	1.03189	FC	0.124732	H
956	P27701	CD82	CD82 antigen					0.633092	T	0.688293	1.18353	FC	0.217178	H
869	P21926	CD9	CD9 antigen					0.0767901	T	0.112822	0.694361	FC	-0.839526	H
1227	P48960	ADGRE5	CD97 antigen					0.000100025	T	0.000712927	0.223885	FC	-2.22068	H
2518	Q9NZ45	CISD1	CDGSH iron-sulfur domain-containing protein 1					0.543113	T	0.603315	0.906098	FC	-0.277213	H
2084	Q8N5K1	CISD2	CDGSH iron-sulfur domain-containing protein 2					0.0162366	T	0.0304968	0.467874	FC	-1.1858	H
2253	Q96JB5	CDK5RAP3	CDK5 regulatory subunit-associated protein 3					0.0235478	T	0.0412603	0.560491	FC	-1.10638	H
75	O14735	CDIPT	CDP-diacylglycerol--inositol 3-phosphatidyltransferase					0.0277727	U	0.0458718	0.431616	H	-0.59	R
2074	Q8N163	CCAR2	Cell cycle and apoptosis regulator protein 2					1.78453e-05	T	0.00029469	0.350482	FC	-2.58362	H
1411	P60953	CDC42	Cell division control protein 42 homolog					0.0368027	T	0.060111	0.800766	FC	-1.00859	H
2282	Q99459	CDC5L	Cell division cycle 5-like protein					0.000371932	T	0.00159816	0.258087	FC	-1.95282	H
2067	Q8IX12	CCAR1	Cell division cycle and apoptosis regulator protein 1					0.000267805	T	0.00129595	0.329491	FC	-2.01931	H
2298	Q99795	GPA33	Cell surface A33 antigen					0.000232599	T	0.00118333	0.212078	FC	-2.04793	H
1167	P43121	MCAM	Cell surface glycoprotein MUC18					0.00728456	U	0.0149711	1.87604	H	0.72	R
1480	P62633	CNBP	Cellular nucleic acid-binding protein					0.00132992	T	0.00407265	0.456307	FC	-1.6966	H
346	P00450	CP	Ceruloplasmin					0.0548083	T	0.0843414	1.59868	FC	0.918514	H
2450	Q9HD42	CHMP1A	Charged multivesicular body protein 1a					0.00104292	T	0.00335583	0.455861	FC	-1.74538	H
2363	Q9BY43	CHMP4A	Charged multivesicular body protein 4a					0.0493806	T	0.0769643	0.250193	FC	-0.942404	H
2410	Q9H444	CHMP4B	Charged multivesicular body protein 4b					0.637867	T	0.692138	0.875846	FC	-0.214112	H
2352	Q9BWS9	CHID1	Chitinase domain-containing protein 1					0.0116999	T	0.0231758	0.492971	FC	-1.25462	H
1093	P36222	CHI3L1	Chitinase-3-like protein 1					0.510472	T	0.57259	1.41282	FC	0.300273	H
2329	Q9BT22	ALG1	Chitobiosyldiphosphodolichol beta-mannosyltransferase					0.000202827	U	0.00187244	0.000397851	H	-0.98	R
42	O00299	CLIC1	Chloride intracellular channel protein 1					3.60659e-06	T	0.000170732	0.377987	FC	-2.93669	H
2727	Q9Y696	CLIC4	Chloride intracellular channel protein 4					0.027239	T	0.0466453	1.48092	FC	1.07481	H
2103	Q8NE62	CHDH	Choline dehydrogenase, mitochondrial					0.0177148	T	0.0327232	0.192481	FC	-1.16732	H
2138	Q8WWI5	SLC44A1	Choline transporter-like protein 1					0.623442	T	0.679123	1.13581	FC	0.223407	H
1241	P49585	PCYT1A	Choline-phosphate cytidylyltransferase A					0.00025925	T	0.00127033	0.327897	FC	-2.02589	H
2008	Q6UVK1	CSPG4	Chondroitin sulfate proteoglycan 4					0.0130287	T	0.0252002	4.03974	FC	1.23214	H
1565	P83916	CBX1	Chromobox protein homolog 1					0.241322	U	0.298103	0.511963	H	-0.32	R
1708	Q13185	CBX3	Chromobox protein homolog 3	3	6	9	6	0.000784626	W	0.00357814	0.239606	FC	-2.17327	H
1180	P45973	CBX5	Chromobox protein homolog 5					0.000357398	T	0.00155971	0.287692	FC	-1.96087	H
1823	Q14839	CHD4	Chromodomain-helicase-DNA-binding protein 4					0.000734565	T	0.00259045	0.111304	FC	-1.81575	H
657	P10645	CHGA	Chromogranin-A					0.185877	U	0.237708	0.578067	H	-0.36	R
908	P23946	CMA1	Chymase					0.0324224	T	0.0539344	1.88789	FC	1.03665	H
564	P08217	CELA2A	Chymotrypsin-like elastase family member 2A					0.567825	U	0.627107	0.589244	H	-0.16	R
595	P09093	CELA3A	Chymotrypsin-like elastase family member 3A					0.0788775	U	0.112343	20.5977	H	0.46	R
227	O75390	CS	Citrate synthase, mitochondrial					2.91456e-05	T	0.000374453	0.323853	FC	-2.47869	H
179	O60271	SPAG9	C-Jun-amino-terminal kinase-interacting protein 4					0.229258	T	0.287098	1.39366	FC	0.556581	H
1582	Q00610	CLTC	Clathrin heavy chain 1					0.000141819	T	0.00087055	0.547635	FC	-2.14889	H
1812	Q14677	CLINT1	Clathrin interactor 1					0.0317456	T	0.0529346	0.592713	FC	-1.04129	H
610	P09496	CLTA	Clathrin light chain A					0.769568	T	0.810484	0.961274	FC	-0.133	H
611	P09497	CLTB	Clathrin light chain B					0.00664215	T	0.0148014	0.598053	FC	-1.37158	H
123	O15551	CLDN3	Claudin-3					0.000178614	U	0.00187244	0.161439	H	-1	R
1673	Q10570	CPSF1	Cleavage and polyadenylation specificity factor subunit 1					0.00032348	X	0.0564675	only in B		0
2608	Q9UKF6	CPSF3	Cleavage and polyadenylation specificity factor subunit 3					0.0432856	U	0.0676912	0.000956504	H	-0.52	R
162	O43809	NUDT21	Cleavage and polyadenylation specificity factor subunit 5					0.0128116	T	0.0248664	0.612521	FC	-1.23565	H
1914	Q16630	CPSF6	Cleavage and polyadenylation specificity factor subunit 6					0.031209	U	0.0505022	0.229952	H	-0.58	R
2085	Q8N684	CPSF7	Cleavage and polyadenylation specificity factor subunit 7					0.000166351	T	0.000955074	0.191958	FC	-2.11624	H
1629	Q05048	CSTF1	Cleavage stimulation factor subunit 1					0.00299961	U	0.0074603	0.00195085	H	-0.77	R
1054	P33240	CSTF2	Cleavage stimulation factor subunit 2	51	30	663	30	0.000380106	W	0.00236735	0.137861	FC	-2.2396	H
333	O96005	CLPTM1	Cleft lip and palate transmembrane protein 1					0.468396	T	0.532233	0.739615	FC	-0.331276	H
212	O75153	CLUH	Clustered mitochondria protein homolog					0.163696	T	0.21556	0.572208	FC	-0.649376	H
660	P10909	CLU	Clusterin					0.170629	T	0.223112	1.25874	FC	0.63828	H
2277	Q99417	MYCBP	c-Myc-binding protein					3.27884e-05	T	0.000393038	0.208845	FC	-2.45371	H
1772	Q14019	COTL1	Coactosin-like protein					0.0341672	T	0.0565003	0.727529	FC	-1.02508	H
359	P00748	F12	Coagulation factor XII					0.262245	T	0.32111	1.43234	FC	0.517596	H
347	P00488	F13A1	Coagulation factor XIII A chain					0.663428	T	0.716811	1.11357	FC	0.197873	H
486	P05160	F13B	Coagulation factor XIII B chain					0.171707	U	0.223788	4.34298	H	0.36	R
1337	P53621	COPA	Coatomer subunit alpha					0.00252153	T	0.00677829	0.524468	FC	-1.56804	H
1336	P53618	COPB1	Coatomer subunit beta					0.00994576	T	0.0202467	0.562841	FC	-1.28841	H
1082	P35606	COPB2	Coatomer subunit beta'					0.00782422	T	0.0167713	0.630298	FC	-1.33796	H
1216	P48444	ARCN1	Coatomer subunit delta					0.00535638	T	0.0124093	0.562903	FC	-1.41553	H
72	O14579	COPE	Coatomer subunit epsilon					0.609257	T	0.665489	0.86347	FC	-0.232645	H
2725	Q9Y678	COPG1	Coatomer subunit gamma-1					0.00161818	T	0.00478768	0.503952	FC	-1.65722	H
2550	Q9UBF2	COPG2	Coatomer subunit gamma-2					0.00113064	U	0.00372391	0.00268336	H	-0.86	R
1451	P61923	COPZ1	Coatomer subunit zeta-1					0.000150081	T	0.000903395	0.41942	FC	-2.1373	H
65	O00748	CES2	Cocaine esterase					0.194469	T	0.249267	0.723174	FC	-0.602716	H
903	P23528	CFL1	Cofilin-1					0.000277052	T	0.00131758	0.575586	FC	-2.01242	H
2654	Q9Y281	CFL2	Cofilin-2					0.0770093	T	0.113034	1.70139	FC	0.838846	H
2082	Q8N3U4	STAG2	Cohesin subunit SA-2					0.73373	U	0.779501	0.95334	H	-0.1	R
2219	Q96CT7	CCDC124	Coiled-coil domain-containing protein 124					0.00691589	T	0.0152095	0.14524	FC	-1.36331	H
2197	Q96A33	CCDC47	Coiled-coil domain-containing protein 47					0.000789802	T	0.00273009	0.294564	FC	-1.80119	H
1899	Q16204	CCDC6	Coiled-coil domain-containing protein 6					0.0214652	T	0.0381619	0.571767	FC	-1.12631	H
2737	Q9Y6H1	CHCHD2	Coiled-coil-helix-coiled-coil-helix domain-containing protein 2	79	64	2885	64	0.000470803	W	0.00263188	0.116236	FC	-2.32464	H
240	O75534	CSDE1	Cold shock domain-containing protein E1					0.00719771	T	0.0156402	0.200129	FC	-1.35511	H
1771	Q14011	CIRBP	Cold-inducible RNA-binding protein					0.220701	T	0.278544	0.647321	FC	-0.567392	H
399	P02452	COL1A1	Collagen alpha-1(I) chain					0.105876	T	0.148152	1.83624	FC	0.761362	H
400	P02461	COL3A1	Collagen alpha-1(III) chain					0.0184967	T	0.0338318	3.57524	FC	1.15813	H
401	P02462	COL4A1	Collagen alpha-1(IV) chain	37	3	110	2	0.0384107	W	0.0636936	0.402857	FC	-1.0705	H
852	P20908	COL5A1	Collagen alpha-1(V) chain					0.0724961	T	0.107417	2.04596	FC	0.853208	H
692	P12109	COL6A1	Collagen alpha-1(VI) chain					0.0970111	T	0.137539	1.44264	FC	0.782964	H
2295	Q99715	COL12A1	Collagen alpha-1(XII) chain					0.61052	T	0.666607	1.19617	FC	0.231818	H
1636	Q05707	COL14A1	Collagen alpha-1(XIV) chain					0.00269023	T	0.00715602	2.03402	FC	1.55499	H
1124	P39059	COL15A1	Collagen alpha-1(XV) chain					0.000530852	T	0.00203128	2.21781	FC	1.88107	H
1125	P39060	COL18A1	Collagen alpha-1(XVIII) chain					0.68301	T	0.733429	1.05255	FC	0.185616	H
559	P08123	COL1A2	Collagen alpha-2(I) chain					0.226667	T	0.284403	1.72961	FC	0.559821	H
580	P08572	COL4A2	Collagen alpha-2(IV) chain					0.327319	T	0.388526	0.776395	FC	-0.450308	H
693	P12110	COL6A2	Collagen alpha-2(VI) chain					0.171735	T	0.224453	1.38875	FC	0.636544	H
694	P12111	COL6A3	Collagen alpha-3(VI) chain					0.00341202	T	0.00855456	2.33336	FC	1.50703	H
2215	Q96CG8	CTHRC1	Collagen triple helix repeat-containing protein 1					0.121225	U	0.164439	2.61206	H	0.42	R
418	P02746	C1QB	Complement C1q subcomponent subunit B					0.495264	T	0.557772	1.16623	FC	0.3113	H
419	P02747	C1QC	Complement C1q subcomponent subunit C					0.00591899	T	0.0134623	1.88604	FC	1.39516	H
354	P00736	C1R	Complement C1r subcomponent					0.0849288	T	0.12316	1.80815	FC	0.81535	H
2526	Q9NZP8	C1RL	Complement C1r subcomponent-like protein					0.000449095	T	0.00181786	0.237776	FC	-1.91477	H
621	P09871	C1S	Complement C1s subcomponent					0.0433746	T	0.0691468	1.7812	FC	0.971802	H
511	P06681	C2	Complement C2					0.188818	T	0.243027	0.801753	FC	-0.610817	H
369	P01024	C3	Complement C3					0.042521	T	0.0679023	1.51455	FC	0.976278	H
627	P0C0L4	C4A	Complement C4-A					0.0807108	T	0.117839	1.51534	FC	0.827612	H
628	P0C0L5	C4B_2	Complement C4-B					0.0255642	T	0.0442659	1.53305	FC	1.0886	H
370	P01031	C5	Complement C5					0.0118596	T	0.0234588	2.31064	FC	1.2518	H
1646	Q07021	C1QBP	Complement component 1 Q subcomponent-binding protein, mitochondrial					2.03309e-05	T	0.000310296	0.218966	FC	-2.55558	H
718	P13671	C6	Complement component C6					0.16895	T	0.221331	1.52041	FC	0.640933	H
655	P10643	C7	Complement component C7					0.00114856	T	0.0036044	2.14675	FC	1.72602	H
535	P07357	C8A	Complement component C8 alpha chain					0.0184598	T	0.0337865	2.30529	FC	1.15856	H
536	P07358	C8B	Complement component C8 beta chain					0.17633	T	0.229706	1.71292	FC	0.629429	H
537	P07360	C8G	Complement component C8 gamma chain					0.00458639	U	0.0104738	3.22647	H	0.76	R
420	P02748	C9	Complement component C9					0.571663	T	0.628851	1.14092	FC	0.257652	H
360	P00751	CFB	Complement factor B					0.0659378	T	0.0989066	1.36724	FC	0.875563	H
357	P00746	CFD	Complement factor D					0.0202636	T	0.0364901	2.04134	FC	1.13866	H
584	P08603	CFH	Complement factor H					0.0131697	T	0.0254416	1.72537	FC	1.22988	H
1621	Q03591	CFHR1	Complement factor H-related protein 1					0.212294	U	0.267089	1.40623	H	0.34	R
1109	P36980	CFHR2	Complement factor H-related protein 2					0.100906	T	0.142411	2.17068	FC	0.773272	H
2358	Q9BXR6	CFHR5	Complement factor H-related protein 5					0.0295786	U	0.048768	6.56246	H	0.52	R
485	P05156	CFI	Complement factor I					0.0145968	T	0.0278666	1.9864	FC	1.20827	H
2006	Q6PUV4	CPLX2	Complexin-2					0.00632814	U	0.0135853	0.000660263	H	-0.65	R
2252	Q96JB2	COG3	Conserved oligomeric Golgi complex subunit 3					0.000756497	U	0.00282438	0.00264198	H	-0.86	R
2519	Q9NZB2	FAM120A	Constitutive coactivator of PPAR-gamma-like protein 1					0.000276359	T	0.00131758	0.299925	FC	-2.01293	H
1697	Q13098	GPS1	COP9 signalosome complex subunit 1					0.0276357	T	0.0471369	0.648717	FC	-1.07166	H
1428	P61201	COPS2	COP9 signalosome complex subunit 2					0.00650925	T	0.0145326	0.479985	FC	-1.37572	H
2637	Q9UNS2	COPS3	COP9 signalosome complex subunit 3					0.00122397	T	0.0038026	0.373173	FC	-1.71326	H
2330	Q9BT78	COPS4	COP9 signalosome complex subunit 4					6.83424e-05	T	0.000568096	0.298325	FC	-2.29958	H
2178	Q92905	COPS5	COP9 signalosome complex subunit 5					0.0392158	T	0.0634219	0.706334	FC	-0.994428	H
2028	Q7L5N1	COPS6	COP9 signalosome complex subunit 6					0.000182221	T	0.00101182	0.339141	FC	-2.09764	H
2431	Q9H9Q2	COPS7B	COP9 signalosome complex subunit 7b					0.00817018	U	0.0167175	0.0123665	H	-0.63	R
2293	Q99627	COPS8	COP9 signalosome complex subunit 8					0.0388671	X	0.728563	only in B		0
2302	Q99829	CPNE1	Copine-1					0.12616	T	0.172558	0.632203	FC	-0.717242	H
211	O75131	CPNE3	Copine-3					0.00154321	T	0.00459998	0.344074	FC	-1.66674	H
224	O75367	MACROH2A1	Core histone macro-H2A.1					0.0121671	T	0.0239315	0.436285	FC	-1.24645	H
2534	Q9P0M6	MACROH2A2	Core histone macro-H2A.2					0.513252	T	0.575246	0.846513	FC	-0.298278	H
1072	P35321	SPRR1A	Cornifin-A					0.0432856	U	0.0676912	267.977	H	0.52	R
883	P22528	SPRR1B	Cornifin-B					0.670405	U	0.727162	1	H	0.08	R
2552	Q9UBG3	CRNN	Cornulin					1	U	1	1	H	-0.01	R
1026	P31146	CORO1A	Coronin-1A					0.379178	T	0.44219	0.818596	FC	-0.403206	H
2316	Q9BR76	CORO1B	Coronin-1B					0.00100798	U	0.00333564	0.64615	H	-0.88	R
2622	Q9ULV4	CORO1C	Coronin-1C					0.00375303	T	0.0092763	1.8016	FC	1.48776	H
1392	P57737	CORO7	Coronin-7					0.00102417	T	0.00331844	0.295218	FC	-1.74902	H
975	P28845	HSD11B1	Corticosteroid 11-beta-dehydrogenase isozyme 1					0.176491	U	0.229702	0.00253161	H	-0.36	R
1552	P80365	HSD11B2	Corticosteroid 11-beta-dehydrogenase isozyme 2					0.000700291	U	0.00282438	0.0228236	H	-0.9	R
562	P08185	SERPINA6	Corticosteroid-binding globulin					0.762282	U	0.808297	0.81316	H	-0.09	R
2568	Q9UEE9	CFDP1	Craniofacial development protein 1					0.0213401	U	0.0362328	0.00141059	H	-0.58	R
416	P02741	CRP	C-reactive protein					0.0209404	U	0.0359264	0.160681	H	-0.62	R
699	P12277	CKB	Creatine kinase B-type					0.599593	T	0.656425	1.20134	FC	0.238998	H
798	P17540	CKMT2	Creatine kinase S-type, mitochondrial					0.0146974	X	0.466476	only in B		0
701	P12532	CKMT1B	Creatine kinase U-type, mitochondrial					0.000286072	T	0.00134759	0.517172	FC	-2.00593	H
1186	P46109	CRKL	Crk-like protein					0.000146373	T	0.000886047	0.352596	FC	-2.14242	H
1721	Q13363	CTBP1	C-terminal-binding protein 1					4.05403e-06	T	0.000173179	0.161927	FC	-2.91024	H
1388	P56545	CTBP2	C-terminal-binding protein 2					0.00313622	T	0.00803621	0.303499	FC	-1.52405	H
802	P17812	CTPS1	CTP synthase 1					0.22548	T	0.283295	0.682796	FC	-0.561315	H
2551	Q9UBG0	MRC2	C-type mannose receptor 2					0.788303	T	0.825855	1.09545	FC	0.121887	H
298	O95319	CELF2	CUGBP Elav-like family member 2					0.000528985	U	0.00242604	0.0344448	H	-0.92	R
1749	Q13616	CUL1	Cullin-1					0.125082	T	0.171252	0.549012	FC	-0.719428	H
1750	Q13617	CUL2	Cullin-2					0.0544531	T	0.0838409	0.626757	FC	-0.920011	H
1751	Q13618	CUL3	Cullin-3					0.472009	U	0.534055	0.478683	H	-0.2	R
1752	Q13619	CUL4A	Cullin-4A					0.190534	T	0.244784	0.699925	FC	-0.608337	H
1753	Q13620	CUL4B	Cullin-4B					0.62566	U	0.680214	1	H	-0.12	R
2052	Q86VP6	CAND1	Cullin-associated NEDD8-dissociated protein 1					2.52689e-07	T	7.50961e-05	0.374162	FC	-3.57003	H
2503	Q9NWV4	CZIB	CXXC motif containing zinc binding protein					0.0870356	T	0.125369	0.700712	FC	-0.809425	H
509	P06493	CDK1	Cyclin-dependent kinase 1					0.00377945	T	0.00931686	0.254508	FC	-1.48634	H
855	P21127	CDK11B	Cyclin-dependent kinase 11B					0.00636132	T	0.0142594	0.310125	FC	-1.38043	H
1580	Q00535	CDK5	Cyclin-dependent-like kinase 5					0.00117802	T	0.00368031	0.216252	FC	-1.72094	H
94	O14976	GAK	Cyclin-G-associated kinase					0.0356128	T	0.058441	0.376384	FC	-1.01589	H
447	P04080	CSTB	Cystatin-B					0.000257147	T	0.00126873	0.482994	FC	-2.02755	H
372	P01034	CST3	Cystatin-C					0.0360431	T	0.0590484	0.496936	FC	-1.01323	H
860	P21291	CSRP1	Cysteine and glycine-rich protein 1					0.00320495	T	0.00815992	2.96016	FC	1.51968	H
1905	Q16527	CSRP2	Cysteine and glycine-rich protein 2					0.331543	T	0.392539	0.775762	FC	-0.446286	H
2581	Q9UHD1	CHORDC1	Cysteine and histidine-rich domain-containing protein 1					7.02518e-05	T	0.0005788	0.151762	FC	-2.29385	H
1326	P52943	CRIP2	Cysteine-rich protein 2					0.510874	T	0.57281	1.16971	FC	0.299984	H
2013	Q6UXH1	CRELD2	Cysteine-rich with EGF-like domain protein 2					0.177247	T	0.23047	1.37611	FC	0.628026	H
1243	P49589	CARS1	Cysteine--tRNA ligase, cytoplasmic					0.00427054	T	0.0102913	0.567122	FC	-1.46159	H
1046	P32320	CDA	Cytidine deaminase					0.245959	T	0.304776	1.33238	FC	0.536345	H
469	P04839	CYBB	Cytochrome b-245 heavy chain					0.469642	T	0.533216	1.20812	FC	0.330334	H
713	P13498	CYBA	Cytochrome b-245 light chain					0.529292	T	0.590853	0.840047	FC	-0.286881	H
336	P00167	CYB5A	Cytochrome b5					0.00576624	T	0.013147	0.67312	FC	-1.4005	H
125	O43169	CYB5B	Cytochrome b5 type B					0.000510818	T	0.00197753	0.231182	FC	-1.88882	H
1033	P31930	UQCRC1	Cytochrome b-c1 complex subunit 1, mitochondrial					0.00304511	T	0.00783871	0.512179	FC	-1.53001	H
888	P22695	UQCRC2	Cytochrome b-c1 complex subunit 2, mitochondrial					0.108173	T	0.150912	0.714827	FC	-0.756021	H
552	P07919	UQCRH	Cytochrome b-c1 complex subunit 6, mitochondrial					0.000466374	T	0.00186157	0.402969	FC	-1.90716	H
751	P14927	UQCRB	Cytochrome b-c1 complex subunit 7					2.79574e-05	T	0.000373612	0.164301	FC	-2.48753	H
90	O14949	UQCRQ	Cytochrome b-c1 complex subunit 8					0.73373	U	0.779501	1.17361	H	0.1	R
1210	P47985	UQCRFS1	Cytochrome b-c1 complex subunit Rieske, mitochondrial					0.213185	T	0.26979	0.766525	FC	-0.57716	H
1575	P99999	CYCS	Cytochrome c					0.00047805	T	0.00188587	0.320312	FC	-1.90217	H
2663	Q9Y2R0	COA3	Cytochrome c oxidase assembly factor 3 homolog, mitochondrial					0.000730167	T	0.0025782	0.304501	FC	-1.81696	H
1965	Q5JTJ3	COA6	Cytochrome c oxidase assembly factor 6 homolog					1.61114e-05	T	0.000294111	0.266276	FC	-2.60566	H
344	P00403	COX2	Cytochrome c oxidase subunit 2					0.00403579	T	0.00979318	0.402658	FC	-1.47305	H
709	P13073	COX4I1	Cytochrome c oxidase subunit 4 isoform 1, mitochondrial					0.000507422	T	0.00196879	0.422038	FC	-1.89016	H
848	P20674	COX5A	Cytochrome c oxidase subunit 5A, mitochondrial					0.232841	T	0.291104	0.794675	FC	-0.552146	H
652	P10606	COX5B	Cytochrome c oxidase subunit 5B, mitochondrial					0.57017	U	0.627107	0.570521	H	-0.16	R
747	P14854	COX6B1	Cytochrome c oxidase subunit 6B1	52	3	86	3	0.000367497	W	0.0023624	0.192766	FC	-2.39705	H
620	P09669	COX6C	Cytochrome c oxidase subunit 6C					0.00361051	U	0.0085969	0.211012	H	-0.78	R
52	O00483	NDUFA4	Cytochrome c oxidase subunit NDUFA4					0.28617	T	0.345706	0.788674	FC	-0.491573	H
581	P08574	CYC1	Cytochrome c1, heme protein, mitochondrial	57	17	1766	1	0.000226607	W	0.00182206	0.280046	FC	-2.49697	H
2272	Q96SQ9	CYP2S1	Cytochrome P450 2S1					0.00013173	U	0.00187244	0.000194871	H	-1	R
863	P21399	ACO1	Cytoplasmic aconitate hydratase					0.0453143	T	0.0717069	0.722739	FC	-0.961922	H
1790	Q14204	DYNC1H1	Cytoplasmic dynein 1 heavy chain 1					0.212286	T	0.268896	0.906655	FC	-0.578346	H
1724	Q13409	DYNC1I2	Cytoplasmic dynein 1 intermediate chain 2					0.245751	T	0.304653	1.27471	FC	0.536591	H
2736	Q9Y6G9	DYNC1LI1	Cytoplasmic dynein 1 light intermediate chain 1					0.0403315	U	0.0632131	0.732605	H	-0.45	R
128	O43237	DYNC1LI2	Cytoplasmic dynein 1 light intermediate chain 2					2.91275e-06	T	0.000166027	0.550415	FC	-2.98531	H
2027	Q7L576	CYFIP1	Cytoplasmic FMR1-interacting protein 1					0.0756616	U	0.10826	0.473235	H	-0.48	R
2235	Q96F07	CYFIP2	Cytoplasmic FMR1-interacting protein 2					0.196253	U	0.250747	0.531121	H	-0.33	R
1647	Q07065	CKAP4	Cytoskeleton-associated protein 4					0.621295	T	0.677578	1.12195	FC	0.224798	H
1770	Q14008	CKAP5	Cytoskeleton-associated protein 5					0.00458639	U	0.0104738	0.31284	H	-0.76	R
974	P28838	LAP3	Cytosol aminopeptidase					0.000768539	U	0.00282438	0.372163	H	-0.9	R
26	O00154	ACOT7	Cytosolic acyl coenzyme A thioester hydrolase					0.344704	U	0.405714	0.664732	H	-0.26	R
1332	P53384	NUBP1	Cytosolic Fe-S cluster assembly factor NUBP1					3.32632e-06	T	0.000170732	0.20763	FC	-2.95506	H
2255	Q96KP4	CNDP2	Cytosolic non-specific dipeptidase					0.000206363	T	0.00110205	0.422454	FC	-2.07228	H
1256	P49902	NT5C2	Cytosolic purine 5'-nucleotidase					0.000433109	T	0.0017608	0.267174	FC	-1.92208	H
127	O43175	PHGDH	D-3-phosphoglycerate dehydrogenase					0.000211657	T	0.00111539	0.268993	FC	-2.06712	H
2232	Q96EP5	DAZAP1	DAZ-associated protein 1					9.10749e-06	T	0.000234217	0.189499	FC	-2.72996	H
1604	Q02338	BDH1	D-beta-hydroxybutyrate dehydrogenase, mitochondrial	41	12	264	12	9.32627e-05	W	0.00134269	0.0716426	FC	-2.91809	H
1959	Q5BKZ1	ZNF326	DBIRD complex subunit ZNF326					0.145991	U	0.194076	0.207777	H	-0.37	R
2609	Q9UKG1	APPL1	DCC-interacting protein 13-alpha					0.0133068	U	0.0250275	0.257791	H	-0.66	R
2420	Q9H773	DCTPP1	dCTP pyrophosphatase 1					0.000178614	U	0.00187244	0.0545013	H	-1	R
995	P30046	DDT	D-dopachrome decarboxylase					0.00170625	U	0.00484797	0.35614	H	-0.84	R
2245	Q96HY6	DDRGK1	DDRGK domain-containing protein 1					0.0104692	T	0.021097	0.404989	FC	-1.27776	H
2055	Q86X76	NIT1	Deaminated glutathione amidase					0.223103	T	0.28094	0.821236	FC	-0.564325	H
541	P07585	DCN	Decorin					0.000467994	T	0.00186463	2.63504	FC	1.90646	H
2159	Q92608	DOCK2	Dedicator of cytokinesis protein 2					0.490528	U	0.553778	1.29316	H	0.19	R
1595	Q01524	DEFA6	Defensin-6					0.297091	U	0.359989	0.549435	H	-0.28	R
2680	Q9Y394	DHRS7	Dehydrogenase/reductase SDR family member 7					0.57075	U	0.627107	0.963462	H	-0.16	R
2574	Q9UGM3	DMBT1	Deleted in malignant brain tumors 1 protein					0.00728456	U	0.0149711	0.166362	H	-0.72	R
1819	Q14739	LBR	Delta(14)-sterol reductase					0.0139092	T	0.0266815	0.623094	FC	-1.21842	H
1692	Q13011	ECH1	Delta(3,5)-Delta(2,4)-dienoyl-CoA isomerase, mitochondrial					0.00458639	U	0.0104738	0.632692	H	-0.76	R
990	P30038	ALDH4A1	Delta-1-pyrroline-5-carboxylate dehydrogenase, mitochondrial					0.00058284	U	0.00242604	0.206458	H	-0.92	R
1355	P54886	ALDH18A1	Delta-1-pyrroline-5-carboxylate synthase					0.000260185	T	0.00127045	0.305381	FC	-2.02516	H
722	P13716	ALAD	Delta-aminolevulinic acid dehydratase					0.479376	T	0.542723	0.896839	FC	-0.323033	H
2163	Q92629	SGCD	Delta-sarcoglycan					0.554873	T	0.613766	1.16019	FC	0.269092	H
143	O43583	DENR	Density-regulated protein					0.0834095	T	0.121335	0.564063	FC	-0.819704	H
1047	P32321	DCTD	Deoxycytidylate deaminase					0.00953173	T	0.0195895	0.425817	FC	-1.29722	H
2694	Q9Y3Z3	SAMHD1	Deoxynucleoside triphosphate triphosphohydrolase SAMHD1					0.0147778	T	0.0281352	0.624879	FC	-1.20567	H
22	O00115	DNASE2	Deoxyribonuclease-2-alpha					0.0770155	T	0.113034	0.61515	FC	-0.838827	H
2674	Q9Y315	DERA	Deoxyribose-phosphate aldolase					0.00100798	U	0.00333564	0.353736	H	-0.88	R
1056	P33316	DUT	Deoxyuridine 5'-triphosphate nucleotidohydrolase, mitochondrial					5.29921e-05	T	0.000505353	0.21176	FC	-2.35265	H
801	P17661	DES	Desmin					0.00120651	T	0.00375674	4.1047	FC	1.71614	H
1777	Q14126	DSG2	Desmoglein-2					0.00131495	U	0.00397472	0.267203	H	-0.86	R
767	P15924	DSP	Desmoplakin					0.00220222	U	0.00582462	0.229835	H	-0.82	R
1412	P60981	DSTN	Destrin					0.190174	T	0.244501	0.659433	FC	-0.608855	H
2656	Q9Y295	DRG1	Developmentally-regulated GTP-binding protein 1					0.000407353	T	0.00168804	0.273197	FC	-1.93445	H
1361	P55039	DRG2	Developmentally-regulated GTP-binding protein 2					1.78463e-05	T	0.00029469	0.249551	FC	-2.5836	H
2468	Q9NR28	DIABLO	Diablo homolog, mitochondrial					0.000156878	T	0.000928305	0.0967038	FC	-2.12823	H
256	O75907	DGAT1	Diacylglycerol O-acyltransferase 1					0.0123731	T	0.0242343	0.168683	FC	-1.24294	H
616	P09622	DLD	Dihydrolipoyl dehydrogenase, mitochondrial					4.36228e-05	T	0.000444666	0.495207	FC	-2.39346	H
650	P10515	DLAT	Dihydrolipoyllysine-residue acetyltransferase component of pyruvate dehydrogenase complex, mitochondrial	10	3	9	3	0.000229633	W	0.00182206	0.317488	FC	-2.47776	H
1107	P36957	DLST	Dihydrolipoyllysine-residue succinyltransferase component of 2-oxoglutarate dehydrogenase complex, mitochondrial					0.273036	U	0.331417	0.79071	H	-0.3	R
602	P09417	QDPR	Dihydropteridine reductase					0.00579536	U	0.0125088	0.569928	H	-0.74	R
1909	Q16555	DPYSL2	Dihydropyrimidinase-related protein 2					0.306065	T	0.367514	1.10047	FC	0.471124	H
1788	Q14195	DPYSL3	Dihydropyrimidinase-related protein 3					0.0103293	T	0.0208724	1.46354	FC	1.28055	H
783	P16444	DPEP1	Dipeptidase 1					0.00058284	U	0.00242604	0.0579911	H	-0.92	R
1338	P53634	CTSC	Dipeptidyl peptidase 1					0.0362652	T	0.0593372	0.624388	FC	-1.01186	H
2586	Q9UHL4	DPP7	Dipeptidyl peptidase 2					0.628869	T	0.684234	1.1236	FC	0.219898	H
2510	Q9NY33	DPP3	Dipeptidyl peptidase 3					0.000101312	T	0.000712927	0.259717	FC	-2.21804	H
952	P27487	DPP4	Dipeptidyl peptidase 4					0.176512	T	0.229836	0.71421	FC	-0.62915	H
2521	Q9NZJ9	NUDT4	Diphosphoinositol polyphosphate phosphohydrolase 2					6.7699e-05	T	0.000566117	0.134136	FC	-2.30155	H
74	O14672	ADAM10	Disintegrin and metalloproteinase domain-containing protein 10					0.063214	U	0.0931807	0.126016	H	-0.47	R
1906	Q16531	DDB1	DNA damage-binding protein 1					0.000310629	T	0.00142461	0.476437	FC	-1.98925	H
41	O00273	DFFA	DNA fragmentation factor subunit alpha					0.0091129	T	0.0188815	0.226985	FC	-1.30651	H
820	P18858	LIG1	DNA ligase 1					0.00032348	X	0.0564675	only in B		0
1169	P43246	MSH2	DNA mismatch repair protein Msh2					0.0139975	T	0.0267957	0.392064	FC	-1.21709	H
1318	P52701	MSH6	DNA mismatch repair protein Msh6					0.000296925	U	0.00187244	0.0164408	H	-0.96	R
2172	Q92878	RAD50	DNA repair protein RAD50					9.73795e-06	T	0.000234375	0.195527	FC	-2.71526	H
1247	P49736	MCM2	DNA replication licensing factor MCM2					0.00343247	T	0.0085827	0.0282585	FC	-1.50582	H
919	P25205	MCM3	DNA replication licensing factor MCM3					0.0912858	T	0.130615	0.592969	FC	-0.797844	H
1057	P33991	MCM4	DNA replication licensing factor MCM4					0.00149497	T	0.00448009	0.177492	FC	-1.67312	H
1058	P33992	MCM5	DNA replication licensing factor MCM5					0.116309	U	0.159946	0.255718	H	-0.42	R
1807	Q14566	MCM6	DNA replication licensing factor MCM6					0.000439639	U	0.00215423	0.320196	H	-0.94	R
1059	P33993	MCM7	DNA replication licensing factor MCM7					0.0395113	T	0.0637153	0.442313	FC	-0.99275	H
679	P11387	TOP1	DNA topoisomerase 1					0.000599005	T	0.00222476	0.214078	FC	-1.85676	H
680	P11388	TOP2A	DNA topoisomerase 2-alpha					0.017141	T	0.0320233	0.206621	FC	-1.17431	H
1612	Q02880	TOP2B	DNA topoisomerase 2-beta					0.000138316	T	0.000856561	0.173204	FC	-2.15402	H
955	P27695	APEX1	DNA-(apurinic or apyrimidinic site) lyase					1.18197e-05	T	0.000258744	0.439212	FC	-2.67289	H
2641	Q9UPW6	SATB2	DNA-binding protein SATB2	51	29	988	28	0.0974697	W	0.139623	0.490887	FC	-0.81883	H
1547	P78527	PRKDC	DNA-dependent protein kinase catalytic subunit					0.000224846	T	0.0011608	0.247745	FC	-2.05482	H
917	P24928	POLR2A	DNA-directed RNA polymerase II subunit RPB1					0.0121492	T	0.0239132	0.204154	FC	-1.24676	H
1024	P30876	POLR2B	DNA-directed RNA polymerase II subunit RPB2					0.00468568	T	0.0110881	0.358511	FC	-1.44275	H
1314	P52434	POLR2H	DNA-directed RNA polymerases I, II, and III subunit RPABC3					5.24466e-05	T	0.000505233	0.0773773	FC	-2.35482	H
1032	P31689	DNAJA1	DnaJ homolog subfamily A member 1					0.000618635	T	0.00228551	0.267579	FC	-1.85028	H
205	O60884	DNAJA2	DnaJ homolog subfamily A member 2					0.000499731	T	0.0019521	0.353422	FC	-1.89324	H
2233	Q96EY1	DNAJA3	DnaJ homolog subfamily A member 3, mitochondrial	35	6	281	4	0.0028168	W	0.0083252	0.0546404	FC	-1.80969	H
923	P25685	DNAJB1	DnaJ homolog subfamily B member 1					2.53583e-05	T	0.000357783	0.186189	FC	-2.50831	H
2558	Q9UBS4	DNAJB11	DnaJ homolog subfamily B member 11					0.182281	T	0.236002	0.734073	FC	-0.620432	H
2567	Q9UDY4	DNAJB4	DnaJ homolog subfamily B member 4					0.51494	U	0.578981	0.336498	H	-0.18	R
2497	Q9NVH1	DNAJC11	DnaJ homolog subfamily C member 11					0.0836967	U	0.118904	0.630121	H	-0.4	R
213	O75165	DNAJC13	DnaJ homolog subfamily C member 13					0.0256741	T	0.0443462	0.474138	FC	-1.08767	H
1710	Q13217	DNAJC3	DnaJ homolog subfamily C member 3					0.000328763	T	0.00146946	0.345986	FC	-1.97776	H
2409	Q9H3Z4	DNAJC5	DnaJ homolog subfamily C member 5					0.00623931	T	0.0140422	0.320129	FC	-1.38439	H
261	O75937	DNAJC8	DnaJ homolog subfamily C member 8					3.32624e-05	T	0.00039406	0.259264	FC	-2.45067	H
196	O60762	DPM1	Dolichol-phosphate mannosyltransferase subunit 1					0.000996468	T	0.00326847	0.313933	FC	-1.75452	H
1126	P39656	DDOST	Dolichyl-diphosphooligosaccharide--protein glycosyltransferase 48 kDa subunit					0.112529	T	0.156288	0.67831	FC	-0.74615	H
470	P04843	RPN1	Dolichyl-diphosphooligosaccharide--protein glycosyltransferase subunit 1					0.00355868	T	0.00885076	0.567376	FC	-1.49852	H
471	P04844	RPN2	Dolichyl-diphosphooligosaccharide--protein glycosyltransferase subunit 2					0.0194999	T	0.0354809	0.601587	FC	-1.14687	H
1449	P61803	DAD1	Dolichyl-diphosphooligosaccharide--protein glycosyltransferase subunit DAD1					0.51713	T	0.578896	1.19357	FC	0.295504	H
1203	P46977	STT3A	Dolichyl-diphosphooligosaccharide--protein glycosyltransferase subunit STT3A					0.116248	T	0.160416	0.7234	FC	-0.737979	H
2118	Q8TCJ2	STT3B	Dolichyl-diphosphooligosaccharide--protein glycosyltransferase subunit STT3B					0.0107033	T	0.0214758	0.52395	FC	-1.27316	H
1260	P49959	MRE11	Double-strand break repair protein MRE11					0.00489314	T	0.0114845	0.250355	FC	-1.43395	H
172	O60216	RAD21	Double-strand-break repair protein rad21 homolog					0.0336638	T	0.0558001	0.504459	FC	-1.02836	H
321	O95793	STAU1	Double-stranded RNA-binding protein Staufen homolog 1					0.00163894	T	0.00481849	0.311777	FC	-1.65466	H
1373	P55265	ADAR	Double-stranded RNA-specific adenosine deaminase					0.000144213	T	0.000879447	0.247388	FC	-2.14546	H
1915	Q16643	DBN1	Drebrin					0.0279758	T	0.047504	2.30805	FC	1.06899	H
2601	Q9UJU6	DBNL	Drebrin-like protein					8.20249e-05	T	0.000634614	0.576382	FC	-2.2617	H
1606	Q02750	MAP2K1	Dual specificity mitogen-activated protein kinase kinase 1					0.000329839	U	0.00187244	0.345005	H	-0.96	R
1096	P36507	MAP2K2	Dual specificity mitogen-activated protein kinase kinase 2					0.823933	T	0.858033	1.06348	FC	0.100962	H
1189	P46734	MAP2K3	Dual specificity mitogen-activated protein kinase kinase 3					4.8317e-05	T	0.000478544	0.323491	FC	-2.372	H
1290	P51452	DUSP3	Dual specificity protein phosphatase 3					0.452313	T	0.514796	1.20963	FC	0.343563	H
1789	Q14203	DCTN1	Dynactin subunit 1					0.000398227	T	0.00166754	0.443956	FC	-1.93902	H
1742	Q13561	DCTN2	Dynactin subunit 2					0.000463023	T	0.00185541	0.594699	FC	-1.90861	H
260	O75935	DCTN3	Dynactin subunit 3					0.312493	T	0.373396	1.28472	FC	0.464722	H
1630	Q05193	DNM1	Dynamin-1					0.503631	U	0.567881	1	H	0.12	R
48	O00429	DNM1L	Dynamin-1-like protein					0.0024724	T	0.00667755	0.39967	FC	-1.572	H
1274	P50570	DNM2	Dynamin-2					4.40219e-06	T	0.000175647	0.325162	FC	-2.89166	H
180	O60313	OPA1	Dynamin-like 120 kDa protein, mitochondrial					0.212294	U	0.267089	0.539527	H	-0.34	R
1516	P63167	DYNLL1	Dynein light chain 1, cytoplasmic					0.00111896	T	0.0035379	0.658707	FC	-1.73126	H
2236	Q96FJ2	DYNLL2	Dynein light chain 2, cytoplasmic					0.000230678	T	0.00117785	0.301243	FC	-2.04961	H
258	O75923	DYSF	Dysferlin					0.670405	U	0.727162	1	H	0.08	R
1776	Q14118	DAG1	Dystroglycan					0.956301	T	0.974443	0.988297	FC	-0.0248491	H
682	P11532	DMD	Dystrophin					0.0251378	T	0.0437172	1.35689	FC	1.09225	H
1254	P49792	RANBP2	E3 SUMO-protein ligase RanBP2					0.00364286	T	0.00902796	0.506695	FC	-1.49379	H
1797	Q14258	TRIM25	E3 ubiquitin/ISG15 ligase TRIM25					2.84411e-05	T	0.000374453	0.281551	FC	-2.48389	H
2702	Q9Y4X5	ARIH1	E3 ubiquitin-protein ligase ARIH1					0.584779	U	0.642016	1	H	0.12	R
2122	Q8TDB6	DTX3L	E3 ubiquitin-protein ligase DTX3L					0.00203396	T	0.00577323	0.142696	FC	-1.61127	H
2042	Q7Z6Z7	HUWE1	E3 ubiquitin-protein ligase HUWE1					6.30362e-05	T	0.000548474	0.301262	FC	-2.31641	H
2704	Q9Y508	RNF114	E3 ubiquitin-protein ligase RNF114					0.00045647	T	0.00183706	0.0570473	FC	-1.91149	H
1978	Q63HN8	RNF213	E3 ubiquitin-protein ligase RNF213					0.000246128	U	0.00187244	0.442224	H	-0.98	R
826	P19474	TRIM21	E3 ubiquitin-protein ligase TRIM21					0.00299961	U	0.0074603	0.000899065	H	-0.77	R
1971	Q5T4S7	UBR4	E3 ubiquitin-protein ligase UBR4					0.0323807	T	0.0538971	0.415802	FC	-1.03693	H
278	O94874	UFL1	E3 UFM1-protein ligase 1					0.0016994	U	0.00484797	0.255337	H	-0.84	R
1844	Q15075	EEA1	Early endosome antigen 1					0.0369633	T	0.0603028	0.543708	FC	-1.00762	H
47	O00423	EML1	Echinoderm microtubule-associated protein-like 1					0.150508	T	0.200941	1.73879	FC	0.671592	H
326	O95834	EML2	Echinoderm microtubule-associated protein-like 2					0.166262	T	0.218321	1.35605	FC	0.645226	H
2444	Q9HC35	EML4	Echinoderm microtubule-associated protein-like 4					0.000875751	T	0.00295051	0.38346	FC	-1.78044	H
1261	P49961	ENTPD1	Ectonucleoside triphosphate diphosphohydrolase 1					0.399454	T	0.461786	0.791991	FC	-0.385976	H
2211	Q96C19	EFHD2	EF-hand domain-containing protein D2					2.73928e-05	T	0.000369604	0.399115	FC	-2.49188	H
1680	Q12805	EFEMP1	EGF-containing fibulin-like extracellular matrix protein 1					0.768735	T	0.810136	1.08637	FC	0.133496	H
330	O95967	EFEMP2	EGF-containing fibulin-like extracellular matrix protein 2					0.164969	T	0.21693	1.61279	FC	0.647311	H
2416	Q9H4M9	EHD1	EH domain-containing protein 1					0.933544	T	0.956839	0.992548	FC	-0.0378169	H
2525	Q9NZN4	EHD2	EH domain-containing protein 2					0.0122261	T	0.0240137	1.69826	FC	1.24544	H
2396	Q9H223	EHD4	EH domain-containing protein 4					0.00140521	T	0.0042614	0.501105	FC	-1.68554	H
2160	Q92616	GCN1	eIF-2-alpha kinase activator GCN1					2.88113e-05	T	0.000374453	0.230834	FC	-2.48114	H
1885	Q15717	ELAVL1	ELAV-like protein 1					0.0434699	T	0.0692592	0.484613	FC	-0.971307	H
731	P13804	ETFA	Electron transfer flavoprotein subunit alpha, mitochondrial					2.82766e-06	T	0.000164534	0.328837	FC	-2.99208	H
1116	P38117	ETFB	Electron transfer flavoprotein subunit beta					0.000216118	T	0.00113249	0.523804	FC	-2.06287	H
1531	P68104	EEF1A1	Elongation factor 1-alpha 1					0.000254473	T	0.00126018	0.533459	FC	-2.02967	H
1634	Q05639	EEF1A2	Elongation factor 1-alpha 2					1	U	1	1	H	-0.01	R
910	P24534	EEF1B2	Elongation factor 1-beta					0.00612354	T	0.0138151	0.538815	FC	-1.38822	H
987	P29692	EEF1D	Elongation factor 1-delta					0.679301	T	0.731414	1.15176	FC	0.187926	H
942	P26641	EEF1G	Elongation factor 1-gamma					0.00329234	T	0.00832173	0.51851	FC	-1.51424	H
716	P13639	EEF2	Elongation factor 2					0.00235133	T	0.00645859	0.543725	FC	-1.58211	H
2267	Q96RP9	GFM1	Elongation factor G, mitochondrial					5.7e-05	X	0.0564675	only in B		0
1177	P43897	TSFM	Elongation factor Ts, mitochondrial					0.00125943	T	0.00389546	0.370667	FC	-1.70752	H
1238	P49411	TUFM	Elongation factor Tu, mitochondrial					1.6895e-05	T	0.00029469	0.250056	FC	-2.59541	H
1866	Q15370	ELOB	Elongin-B					0.000162916	T	0.000945287	0.431783	FC	-2.12051	H
1865	Q15369	ELOC	Elongin-C					0.0117636	T	0.0232854	0.381957	FC	-1.25349	H
1267	P50402	EMD	Emerin					0.844234	T	0.875319	0.963306	FC	-0.0891461	H
2730	Q9Y6C2	EMILIN1	EMILIN-1					0.0102476	T	0.0207402	1.69197	FC	1.2822	H
2591	Q9UI08	EVL	Ena/VASP-like protein					0.185877	U	0.237708	0.517496	H	-0.36	R
2306	Q99961	SH3GL1	Endophilin-A2					0.000765644	T	0.00266785	0.401509	FC	-1.80743	H
2677	Q9Y371	SH3GLB1	Endophilin-B1					0.0211339	U	0.0359264	0.450466	H	-0.62	R
2472	Q9NR46	SH3GLB2	Endophilin-B2					0.599406	T	0.656425	1.1252	FC	0.239122	H
2517	Q9NZ08	ERAP1	Endoplasmic reticulum aminopeptidase 1					0.000647701	T	0.00236474	0.322605	FC	-1.84105	H
1993	Q6P179	ERAP2	Endoplasmic reticulum aminopeptidase 2					0.0125778	U	0.0237525	0.12783	H	-0.67	R
661	P11021	HSPA5	Endoplasmic reticulum chaperone BiP					0.690926	T	0.740179	0.943509	FC	-0.180703	H
2032	Q7Z2K6	ERMP1	Endoplasmic reticulum metallopeptidase 1					0.0257481	U	0.0426792	0.685561	H	-0.6	R
991	P30040	ERP29	Endoplasmic reticulum resident protein 29					0.00218072	T	0.00607253	0.594411	FC	-1.59726	H
2324	Q9BS26	ERP44	Endoplasmic reticulum resident protein 44					0.00392027	T	0.00957944	0.588047	FC	-1.47893	H
2194	Q969X5	ERGIC1	Endoplasmic reticulum-Golgi intermediate compartment protein 1					0.0706883	T	0.10541	0.599208	FC	-0.859184	H
743	P14625	HSP90B1	Endoplasmin					0.00728456	U	0.0149711	0.564036	H	-0.72	R
1954	Q53H82	LACTB2	Endoribonuclease LACTB2					0.00602291	T	0.0136653	0.186112	FC	-1.3916	H
204	O60869	EDF1	Endothelial differentiation-related factor 1					0.000266895	T	0.00129416	0.369597	FC	-2.02	H
1996	Q6P2E9	EDC4	Enhancer of mRNA-decapping protein 4					0.00013173	U	0.00187244	0.000479667	H	-1	R
1567	P84090	ERH	Enhancer of rudimentary homolog					6.16332e-05	T	0.000543033	0.389766	FC	-2.3211	H
2590	Q9UHY7	ENOPH1	Enolase-phosphatase E1					7.39038e-05	T	0.00058474	0.19225	FC	-2.28332	H
1152	P42126	ECI1	Enoyl-CoA delta isomerase 1, mitochondrial					0.0023986	T	0.00654866	0.564415	FC	-1.5781	H
999	P30084	ECHS1	Enoyl-CoA hydratase, mitochondrial	39	14	243	14	1.8572e-05	W	0.000773063	0.337467	FC	-3.15015	H
1793	Q14244	MAP7	Ensconsin					0.00031307	U	0.00187244	0.00984123	H	-0.96	R
702	P12724	RNASE3	Eosinophil cationic protein					0.440555	T	0.503259	0.74575	FC	-0.352715	H
684	P11678	EPX	Eosinophil peroxidase					0.73373	U	0.779501	0.853092	H	-0.1	R
980	P29323	EPHB2	Ephrin type-B receptor 2					0.129457	T	0.176205	0.467291	FC	-0.710649	H
2418	Q9H6S3	EPS8L2	Epidermal growth factor receptor kinase substrate 8-like protein 2					0.0340124	T	0.0562776	0.240229	FC	-1.02608	H
2123	Q8TE67	EPS8L3	Epidermal growth factor receptor kinase substrate 8-like protein 3					0.0211339	U	0.0359264	0.369848	H	-0.62	R
1159	P42566	EPS15	Epidermal growth factor receptor substrate 15					0.0539026	U	0.0801223	0.3396	H	-0.52	R
2546	Q9UBC2	EPS15L1	Epidermal growth factor receptor substrate 15-like 1					0.0305538	T	0.0513459	0.528498	FC	-1.0497	H
1395	P58107	EPPK1	Epiplakin					0.00907577	T	0.0188466	0.458779	FC	-1.30736	H
781	P16422	EPCAM	Epithelial cell adhesion molecule					9.53613e-06	T	0.000234217	0.0642662	FC	-2.71985	H
1991	Q6NXG1	ESRP1	Epithelial splicing regulatory protein 1					0.000650869	T	0.00236875	0.29505	FC	-1.84006	H
525	P07099	EPHX1	Epoxide hydrolase 1					0.113818	T	0.157608	0.825733	FC	-0.743292	H
2738	Q9Y6I3	EPN1	Epsin-1					0.364171	T	0.426607	1.25702	FC	0.416357	H
2088	Q8N766	EMC1	ER membrane protein complex subunit 1					0.000352483	T	0.0015455	0.201195	FC	-1.96367	H
1831	Q15006	EMC2	ER membrane protein complex subunit 2					0.0806495	T	0.117811	0.520289	FC	-0.827794	H
234	O75477	ERLIN1	Erlin-1					2.1552e-05	T	0.000323628	0.170556	FC	-2.54308	H
282	O94905	ERLIN2	Erlin-2					3.00777e-05	T	0.000375043	0.320348	FC	-2.472	H
2243	Q96HE7	ERO1A	ERO1-like protein alpha					0.00058284	U	0.00242604	0.200632	H	-0.92	R
944	P27105	STOM	Erythrocyte band 7 integral membrane protein					0.0199272	T	0.0360238	1.76782	FC	1.14224	H
784	P16452	EPB42	Erythrocyte membrane protein band 4.2					0.178628	T	0.231835	0.717578	FC	-0.625925	H
2394	Q9H0W9	C11orf54	Ester hydrolase C11orf54					0.00100013	T	0.00327091	0.383359	FC	-1.75379	H
2095	Q8NBQ5	HSD17B11	Estradiol 17-beta-dehydrogenase 11					0.000329839	U	0.00187244	0.330383	H	-0.96	R
2147	Q92506	HSD17B8	Estradiol 17-beta-dehydrogenase 8					0.391189	T	0.454111	1.47137	FC	0.392928	H
2486	Q9NTX5	ECHDC1	Ethylmalonyl-CoA decarboxylase					0.00930486	T	0.0191797	0.190164	FC	-1.3022	H
1406	P60842	EIF4A1	Eukaryotic initiation factor 4A-I					5.17459e-05	T	0.000501828	0.386966	FC	-2.35763	H
1792	Q14240	EIF4A2	Eukaryotic initiation factor 4A-II					0.073948	T	0.109279	0.649674	FC	-0.848503	H
1121	P38919	EIF4A3	Eukaryotic initiation factor 4A-III					0.000208571	T	0.00110581	0.262553	FC	-2.07011	H
760	P15170	GSPT1	Eukaryotic peptide chain release factor GTP-binding subunit ERF3A					6.32912e-05	T	0.000548982	0.302924	FC	-2.31557	H
1479	P62495	ETF1	Eukaryotic peptide chain release factor subunit 1					9.64373e-06	T	0.000234217	0.315055	FC	-2.71739	H
133	O43324	EEF1E1	Eukaryotic translation elongation factor 1 epsilon-1					0.000281645	U	0.00187244	0.00128464	H	-0.94	R
1150	P41567	EIF1	Eukaryotic translation initiation factor 1					0.031209	U	0.0505022	0.510572	H	-0.58	R
1206	P47813	EIF1AX	Eukaryotic translation initiation factor 1A, X-chromosomal					0.000111877	T	0.000762942	0.297538	FC	-2.1976	H
492	P05198	EIF2S1	Eukaryotic translation initiation factor 2 subunit 1					0.000166531	T	0.000955074	0.367525	FC	-2.11602	H
839	P20042	EIF2S2	Eukaryotic translation initiation factor 2 subunit 2					0.000362636	T	0.00157621	0.412224	FC	-1.95793	H
1141	P41091	EIF2S3	Eukaryotic translation initiation factor 2 subunit 3					0.00218797	T	0.00608059	0.459619	FC	-1.5966	H
2364	Q9BY44	EIF2A	Eukaryotic translation initiation factor 2A	32	4	191	2	0.00384598	W	0.0105106	0.114567	FC	-1.7166	H
1781	Q14152	EIF3A	Eukaryotic translation initiation factor 3 subunit A					0.00361051	U	0.0085969	0.543283	H	-0.78	R
1382	P55884	EIF3B	Eukaryotic translation initiation factor 3 subunit B	49	3	240	1	0.000285302	W	0.00202246	0.183688	FC	-2.46547	H
2291	Q99613	EIF3C	Eukaryotic translation initiation factor 3 subunit C					0.000168596	T	0.000956679	0.307623	FC	-2.1135	H
115	O15371	EIF3D	Eukaryotic translation initiation factor 3 subunit D					0.000696598	T	0.00249116	0.408097	FC	-1.82642	H
1402	P60228	EIF3E	Eukaryotic translation initiation factor 3 subunit E					0.000108273	T	0.000746685	0.34953	FC	-2.20434	H
43	O00303	EIF3F	Eukaryotic translation initiation factor 3 subunit F					4.20069e-05	T	0.000436153	0.262446	FC	-2.4014	H
250	O75821	EIF3G	Eukaryotic translation initiation factor 3 subunit G					0.00445923	T	0.0106767	0.208615	FC	-1.45281	H
116	O15372	EIF3H	Eukaryotic translation initiation factor 3 subunit H					1.5509e-05	T	0.000290154	0.313733	FC	-2.6139	H
1720	Q13347	EIF3I	Eukaryotic translation initiation factor 3 subunit I					0.000459822	T	0.00184524	0.272456	FC	-1.91001	H
251	O75822	EIF3J	Eukaryotic translation initiation factor 3 subunit J					8.77586e-06	T	0.000234217	0.178837	FC	-2.73812	H
2555	Q9UBQ5	EIF3K	Eukaryotic translation initiation factor 3 subunit K					0.000114363	T	0.000769297	0.317919	FC	-2.19308	H
2649	Q9Y262	EIF3L	Eukaryotic translation initiation factor 3 subunit L					0.00170625	U	0.00484797	0.330526	H	-0.84	R
2026	Q7L2H7	EIF3M	Eukaryotic translation initiation factor 3 subunit M					0.000236155	T	0.00119489	0.300037	FC	-2.04484	H
1624	Q04637	EIF4G1	Eukaryotic translation initiation factor 4 gamma 1	13	5	80	4	0.00140998	W	0.00510562	0.228611	FC	-1.97151	H
1542	P78344	EIF4G2	Eukaryotic translation initiation factor 4 gamma 2					0.000427041	T	0.00174344	0.365972	FC	-1.92493	H
904	P23588	EIF4B	Eukaryotic translation initiation factor 4B					0.00100906	T	0.00329242	0.421329	FC	-1.752	H
515	P06730	EIF4E	Eukaryotic translation initiation factor 4E					0.998205	T	1	0.999309	FC	-0.00101999	H
1840	Q15056	EIF4H	Eukaryotic translation initiation factor 4H					1.60775e-06	T	0.000140326	0.324859	FC	-3.12249	H
1358	P55010	EIF5	Eukaryotic translation initiation factor 5					0.000272397	T	0.00130947	0.336474	FC	-2.01586	H
1520	P63241	EIF5A	Eukaryotic translation initiation factor 5A-1					0.000174852	T	0.000982621	0.492978	FC	-2.10606	H
202	O60841	EIF5B	Eukaryotic translation initiation factor 5B					0.00387539	T	0.00951977	0.3564	FC	-1.48127	H
1387	P56537	EIF6	Eukaryotic translation initiation factor 6					0.00391958	T	0.00957944	0.127225	FC	-1.47897	H
1969	Q5RKV6	EXOSC6	Exosome complex component MTR3					0.0836967	U	0.118904	0.79404	H	-0.4	R
2661	Q9Y2L1	DIS3	Exosome complex exonuclease RRP44					0.00051456	U	0.00242604	0.000527481	H	-0.87	R
1157	P42285	MTREX	Exosome RNA helicase MTR4					0.00203602	U	0.00576151	0.000593324	H	-0.8	R
96	O14980	XPO1	Exportin-1					0.000257642	T	0.00126873	0.354848	FC	-2.02716	H
1363	P55060	CSE1L	Exportin-2					0.000828155	T	0.00281391	0.351781	FC	-1.79167	H
2437	Q9HAV4	XPO5	Exportin-5					0.00359789	U	0.0085969	0.168463	H	-0.78	R
2595	Q9UIA9	XPO7	Exportin-7					0.0311456	U	0.0505022	0.294771	H	-0.58	R
144	O43592	XPOT	Exportin-T					0.00216852	U	0.00582462	0.130414	H	-0.82	R
2328	Q9BSJ8	ESYT1	Extended synaptotagmin-1					0.0153136	T	0.0290169	0.596034	FC	-1.19816	H
10	A0FGR8	ESYT2	Extended synaptotagmin-2					0.307834	T	0.369005	0.708619	FC	-0.469352	H
1912	Q16610	ECM1	Extracellular matrix protein 1	50	4	244	2	0.0394513	W	0.065086	3.51563	FC	1.05302	H
572	P08294	SOD3	Extracellular superoxide dismutase [Cu-Zn]					0.00836236	T	0.0176806	2.11651	FC	1.32426	H
761	P15311	EZR	Ezrin					1.10985e-05	T	0.000254082	0.446363	FC	-2.68663	H
2708	Q9Y5B9	SUPT16H	FACT complex subunit SPT16					1.0819e-05	T	0.000249798	0.341987	FC	-2.6922	H
1663	Q08945	SSRP1	FACT complex subunit SSRP1					5.5288e-06	T	0.000189158	0.20052	FC	-2.84056	H
1325	P52907	CAPZA1	F-actin-capping protein subunit alpha-1					0.00100798	U	0.00333564	0.375151	H	-0.88	R
1204	P47755	CAPZA2	F-actin-capping protein subunit alpha-2					0.0640692	T	0.0966227	0.830455	FC	-0.882295	H
1205	P47756	CAPZB	F-actin-capping protein subunit beta					0.0148462	T	0.0282462	0.801146	FC	-1.2047	H
2202	Q96AE4	FUBP1	Far upstream element-binding protein 1					0.000207315	T	0.00110502	0.370951	FC	-2.07134	H
2181	Q92945	KHSRP	Far upstream element-binding protein 2					9.15321e-09	T	1.27825e-05	0.213026	FC	-4.465	H
2246	Q96I24	FUBP3	Far upstream element-binding protein 3					4.97721e-07	T	9.92954e-05	0.167206	FC	-3.40227	H
738	P14324	FDPS	Farnesyl pyrophosphate synthase					0.00245821	T	0.00665934	0.323054	FC	-1.57316	H
1705	Q13158	FADD	FAS-associated death domain protein					0.12582	U	0.170507	0.445649	H	-0.38	R
2218	Q96CS3	FAF2	FAS-associated factor 2					0.0127358	T	0.0247709	0.355591	FC	-1.2369	H
1917	Q16658	FSCN1	Fascin					0.327188	T	0.388526	0.841617	FC	-0.450433	H
2195	Q969Z0	TBRG4	FAST kinase domain-containing protein 4					0.000243759	U	0.00187244	0.000700776	H	-0.96	R
1233	P49327	FASN	Fatty acid synthase					0.361492	T	0.424132	0.752018	FC	-0.418744	H
1593	Q01469	FABP5	Fatty acid-binding protein 5					0.031209	U	0.0505022	0.366088	H	-0.58	R
755	P15090	FABP4	Fatty acid-binding protein, adipocyte					0.623176	U	0.677777	0.708801	H	-0.14	R
496	P05413	FABP3	Fatty acid-binding protein, heart					0.179787	T	0.233231	1.44634	FC	0.624172	H
691	P12104	FABP2	Fatty acid-binding protein, intestinal					0.442552	U	0.507409	1	H	-0.19	R
527	P07148	FABP1	Fatty acid-binding protein, liver					0.00977242	T	0.0199959	0.194141	FC	-1.29205	H
1300	P51648	ALDH3A2	Fatty aldehyde dehydrogenase					0.139868	U	0.186908	0.398474	H	-0.4	R
2373	Q9BZK7	TBL1XR1	F-box-like/WD repeat-containing protein TBL1XR1					0.00178425	U	0.00505416	0.000552392	H	-0.81	R
2697	Q9Y4F1	FARP1	FERM, ARHGEF and pleckstrin domain-containing protein 1					0.591784	U	0.64945	1.12936	H	0.15	R
2315	Q9BQL6	FERMT1	Fermitin family homolog 1					0.0219171	T	0.0388417	0.298329	FC	-1.12184	H
2201	Q96AC1	FERMT2	Fermitin family homolog 2					0.00827304	T	0.0175582	1.76729	FC	1.32647	H
2049	Q86UX7	FERMT3	Fermitin family homolog 3					0.0170027	T	0.0317862	0.563705	FC	-1.17603	H
437	P02794	FTH1	Ferritin heavy chain					0.0756616	U	0.10826	1.65852	H	0.48	R
436	P02792	FTL	Ferritin light chain					0.0376353	U	0.0590205	3.09686	H	0.56	R
1078	P35555	FBN1	Fibrillin-1					0.32251	T	0.383306	0.747656	FC	-0.454932	H
412	P02671	FGA	Fibrinogen alpha chain					0.0907923	T	0.130043	1.74612	FC	0.799164	H
413	P02675	FGB	Fibrinogen beta chain					0.394936	T	0.45713	1.24127	FC	0.389765	H
414	P02679	FGG	Fibrinogen gamma chain					0.414522	T	0.476641	1.20603	FC	0.373539	H
1798	Q14314	FGL2	Fibroleukin					0.705105	T	0.752238	0.872144	FC	-0.171958	H
1643	Q06828	FMOD	Fibromodulin					0.040473	T	0.0650408	3.05165	FC	0.987365	H
423	P02751	FN1	Fibronectin					0.0071878	T	0.0156351	3.08107	FC	1.35539	H
892	P23142	FBLN1	Fibulin-1					0.00941236	T	0.0193584	2.16123	FC	1.29982	H
1572	P98095	FBLN2	Fibulin-2					0.0360464	T	0.0590484	3.51331	FC	1.01321	H
2563	Q9UBX5	FBLN5	Fibulin-5					0.707007	T	0.753979	1.09951	FC	0.17079	H
62	O00602	FCN1	Ficolin-1					0.552248	U	0.61378	1	H	-0.16	R
861	P21333	FLNA	Filamin-A					0.00325139	T	0.00824787	2.50292	FC	1.51677	H
226	O75369	FLNB	Filamin-B					4.13453e-05	T	0.000435502	0.37161	FC	-2.40474	H
2130	Q8WUP2	FBLIM1	Filamin-binding LIM protein 1					0.786908	U	0.831529	1	H	-0.08	R
1799	Q14315	FLNC	Filamin-C					0.00731144	T	0.0158301	3.08786	FC	1.35189	H
1128	P39748	FEN1	Flap endonuclease 1					0.00100798	U	0.00333564	0.159093	H	-0.88	R
993	P30043	BLVRB	Flavin reductase (NADPH)					0.967806	T	0.983654	0.995717	FC	-0.0183023	H
263	O75955	FLOT1	Flotillin-1					0.00155711	T	0.00463154	0.494595	FC	-1.66494	H
1795	Q14254	FLOT2	Flotillin-2					0.0581605	T	0.0889121	0.600203	FC	-0.904809	H
1632	Q05397	PTK2	Focal adhesion kinase 1					0.0388671	X	0.728563	only in B		0
307	O95466	FMNL1	Formin-like protein 1					0.341312	U	0.405714	1	H	0.24	R
1756	Q13642	FHL1	Four and a half LIM domains protein 1					0.0176637	T	0.0326937	2.73479	FC	1.16793	H
1787	Q14192	FHL2	Four and a half LIM domains protein 2					0.0194531	T	0.0354188	0.530937	FC	-1.14738	H
1757	Q13643	FHL3	Four and a half LIM domains protein 3					0.0717672	T	0.10679	0.634996	FC	-0.855601	H
1284	P51114	FXR1	Fragile X mental retardation syndrome-related protein 1					0.00612193	T	0.0138151	0.286177	FC	-1.38827	H
2411	Q9H479	FN3K	Fructosamine-3-kinase					0.435947	T	0.498403	0.870722	FC	-0.356344	H
605	P09467	FBP1	Fructose-1,6-bisphosphatase 1					0.000197576	T	0.00106737	0.270402	FC	-2.08114	H
2459	Q9NQ88	TIGAR	Fructose-2,6-bisphosphatase TIGAR					0.00607441	T	0.0137676	0.439526	FC	-1.38986	H
446	P04075	ALDOA	Fructose-bisphosphate aldolase A					0.0718639	T	0.106877	0.835285	FC	-0.855283	H
626	P09972	ALDOC	Fructose-bisphosphate aldolase C					0.0172575	U	0.0304678	0.557773	H	-0.64	R
557	P07954	FH	Fumarate hydratase, mitochondrial					3.54598e-06	T	0.000170732	0.337478	FC	-2.94054	H
788	P16930	FAH	Fumarylacetoacetase					0.00282727	U	0.00705051	0.251332	H	-0.8	R
1293	P51570	GALK1	Galactokinase					0.560852	T	0.61842	0.853037	FC	-0.264998	H
856	P21217	FUT3	Galactoside 3(4)-L-fucosyltransferase					0.0017452	U	0.00495359	0.00135038	H	-0.8	R
601	P09382	LGALS1	Galectin-1					5.09632e-05	T	0.000495959	1.60592	FC	2.36083	H
1631	Q05315	CLC	Galectin-10					0.445539	T	0.50833	0.797714	FC	-0.348817	H
488	P05162	LGALS2	Galectin-2					0.443631	U	0.508229	0.799743	H	-0.21	R
806	P17931	LGALS3	Galectin-3					0.000117054	T	0.000778408	0.397457	FC	-2.18829	H
1659	Q08380	LGALS3BP	Galectin-3-binding protein					0.0103961	T	0.0209648	0.594871	FC	-1.27922	H
1386	P56470	LGALS4	Galectin-4					0.136066	T	0.184035	0.634079	FC	-0.697849	H
1209	P47929	LGALS7	Galectin-7					1	U	1	0.948423	H	0	R
32	O00182	LGALS9	Galectin-9					4.13409e-06	T	0.000173179	0.143188	FC	-2.90583	H
2570	Q9UEY8	ADD3	Gamma-adducin					0.0278682	T	0.0474319	0.528959	FC	-1.06983	H
1404	P60520	GABARAPL2	Gamma-aminobutyric acid receptor-associated protein-like 2					0.0276426	T	0.0471369	0.626471	FC	-1.0716	H
596	P09104	ENO2	Gamma-enolase					0.134407	T	0.182056	1.2928	FC	0.701011	H
2170	Q92820	GGH	Gamma-glutamyl hydrolase					0.0244895	T	0.0427495	0.312192	FC	-1.09791	H
215	O75223	GGCT	Gamma-glutamylcyclotransferase					0.00262046	T	0.00699707	0.2539	FC	-1.56029	H
1918	Q16666	IFI16	Gamma-interferon-inducible protein 16					0.00245815	T	0.00665934	0.384947	FC	-1.57317	H
269	O76070	SNCG	Gamma-synuclein					0.149711	U	0.198737	1	H	0.3	R
805	P17900	GM2A	Ganglioside GM2 activator					0.503303	T	0.565911	0.790948	FC	-0.305448	H
2114	Q8TAX9	GSDMB	Gasdermin-B					0.00579536	U	0.0125088	0.117905	H	-0.74	R
1394	P57764	GSDMD	Gasdermin-D					0.103333	T	0.145396	0.640011	FC	-0.767393	H
308	O95479	H6PD	GDH/6PGL endoplasmic bifunctional protein					0.531129	T	0.59243	0.848861	FC	-0.285588	H
2412	Q9H488	POFUT1	GDP-fucose protein O-fucosyltransferase 1					7.06909e-07	T	0.000116141	0.120387	FC	-3.31722	H
1754	Q13630	GFUS	GDP-L-fucose synthase					7.16268e-05	T	0.000581551	0.237215	FC	-2.28982	H
187	O60547	GMDS	GDP-mannose 4,6 dehydratase					4.19562e-05	T	0.000436153	0.251114	FC	-2.40166	H
507	P06396	GSN	Gelsolin					0.000788392	T	0.0027286	1.58771	FC	1.80155	H
1543	P78347	GTF2I	General transcription factor II-I					0.00325426	T	0.00824787	0.105846	FC	-1.51659	H
197	O60763	USO1	General vesicular transport factor p115					0.637827	T	0.692138	0.889149	FC	-0.214138	H
1413	P60983	GMFB	Glia maturation factor beta					3.09287e-05	T	0.000375043	0.304431	FC	-2.46608	H
174	O60234	GMFG	Glia maturation factor gamma					0.201269	T	0.256923	0.744252	FC	-0.593215	H
524	P07093	SERPINE2	Glia-derived nexin					0.0847672	U	0.120363	4.56694	H	0.46	R
375	P01275	GCG	Glucagon					0.273036	U	0.331417	0.536705	H	-0.3	R
2230	Q96EK6	GNPNAT1	Glucosamine 6-phosphate N-acetyltransferase					0.000100357	T	0.000712927	0.27629	FC	-2.22	H
1199	P46926	GNPDA1	Glucosamine-6-phosphate isomerase 1					0.00394341	T	0.00961917	0.383367	FC	-1.47774	H
2002	Q6PCE3	PGM2L1	Glucose 1,6-bisphosphate synthase					0.139099	T	0.187683	1.74371	FC	0.692148	H
681	P11413	G6PD	Glucose-6-phosphate 1-dehydrogenase					0.180883	T	0.234431	0.765554	FC	-0.622523	H
519	P06744	GPI	Glucose-6-phosphate isomerase					0.00990615	T	0.0201866	0.727042	FC	-1.28923	H
736	P14314	PRKCSH	Glucosidase 2 subunit beta					0.00506048	T	0.0118447	0.592913	FC	-1.4271	H
341	P00367	GLUD1	Glutamate dehydrogenase 1, mitochondrial					0.000325595	T	0.00146401	0.497733	FC	-1.97972	H
1217	P48506	GCLC	Glutamate--cysteine ligase catalytic subunit					0.00210776	T	0.0059225	0.353936	FC	-1.60411	H
2310	Q9BQ67	GRWD1	Glutamate-rich WD repeat-containing protein 1					0.00904166	T	0.0188177	0.165803	FC	-1.30814	H
284	O94925	GLS	Glutaminase kidney isoform, mitochondrial					0.000182672	U	0.00187244	0.258849	H	-1	R
3	A0A0B4J2D5	GATD3	Glutamine amidotransferase-like class 1 domain-containing protein 3B, mitochondrial					0.023388	T	0.041006	0.683121	FC	-1.10785	H
756	P15104	GLUL	Glutamine synthetase					0.979176	T	0.992682	1.00974	FC	0.0118364	H
1640	Q06210	GFPT1	Glutamine--fructose-6-phosphate aminotransferase [isomerizing] 1					1.55829e-05	T	0.000290154	0.286254	FC	-2.61287	H
1208	P47897	QARS1	Glutamine--tRNA ligase					6.56335e-05	T	0.000558886	0.347151	FC	-2.308	H
1088	P35754	GLRX	Glutaredoxin-1					0.290472	T	0.350147	0.773062	FC	-0.487065	H
265	O76003	GLRX3	Glutaredoxin-3					9.7383e-05	T	0.000702473	0.346371	FC	-2.2262	H
1094	P36269	GGT5	Glutathione hydrolase 5 proenzyme					0.329731	T	0.391057	0.738393	FC	-0.448006	H
529	P07203	GPX1	Glutathione peroxidase 1					0.9541	T	0.972555	0.990029	FC	-0.0261022	H
814	P18283	GPX2	Glutathione peroxidase 2					2.29172e-05	T	0.000336883	0.108614	FC	-2.52993	H
881	P22352	GPX3	Glutathione peroxidase 3					0.520523	U	0.578981	1.38496	H	0.18	R
343	P00390	GSR	Glutathione reductase, mitochondrial					6.17159e-06	T	0.000191525	0.497784	FC	-2.81603	H
2662	Q9Y2Q3	GSTK1	Glutathione S-transferase kappa 1					5.80815e-06	T	0.000189158	0.30215	FC	-2.82956	H
163	O43813	LANCL1	Glutathione S-transferase LANCL1					0.328404	T	0.389649	1.1626	FC	0.449271	H
608	P09488	GSTM1	Glutathione S-transferase Mu 1					0.344704	U	0.405714	1.44997	H	0.26	R
967	P28161	GSTM2	Glutathione S-transferase Mu 2					0.470569	T	0.534051	1.17209	FC	0.329635	H
857	P21266	GSTM3	Glutathione S-transferase Mu 3					0.0670987	T	0.10054	1.59583	FC	0.871465	H
1615	Q03013	GSTM4	Glutathione S-transferase Mu 4					0.387013	U	0.447774	1	H	0.17	R
1546	P78417	GSTO1	Glutathione S-transferase omega-1					0.0136115	T	0.0261644	0.686356	FC	-1.22296	H
599	P09211	GSTP1	Glutathione S-transferase P					0.000960668	T	0.00316409	0.397399	FC	-1.76187	H
1021	P30711	GSTT1	Glutathione S-transferase theta-1					0.682935	T	0.733429	1.21975	FC	0.185663	H
1221	P48637	GSS	Glutathione synthetase					2.34762e-05	T	0.000341506	0.289577	FC	-2.52478	H
460	P04406	GAPDH	Glyceraldehyde-3-phosphate dehydrogenase					0.000100388	T	0.000712927	0.617055	FC	-2.21993	H
1045	P32189	GK	Glycerol kinase					1	U	1	1	H	0.01	R
865	P21695	GPD1	Glycerol-3-phosphate dehydrogenase [NAD(+)], cytoplasmic					0.472676	U	0.534055	0.627593	H	-0.2	R
2080	Q8N335	GPD1L	Glycerol-3-phosphate dehydrogenase 1-like protein					2.25907e-05	T	0.00033384	0.494301	FC	-2.533	H
1170	P43304	GPD2	Glycerol-3-phosphate dehydrogenase, mitochondrial					4.58584e-05	T	0.000460728	0.315384	FC	-2.38296	H
1148	P41250	GARS1	Glycine--tRNA ligase					0.000106649	T	0.000739135	0.282891	FC	-2.20746	H
1079	P35573	AGL	Glycogen debranching enzyme					0.126395	T	0.172795	0.364188	FC	-0.716768	H
672	P11216	PYGB	Glycogen phosphorylase, brain form					0.273036	U	0.331417	0.762359	H	-0.3	R
518	P06737	PYGL	Glycogen phosphorylase, liver form					0.795428	T	0.832072	1.0656	FC	0.117681	H
673	P11217	PYGM	Glycogen phosphorylase, muscle form					0.0824702	U	0.11734	3.5808	H	0.44	R
1202	P46976	GYG1	Glycogenin-1					0.811642	T	0.847445	1.05611	FC	0.108152	H
1006	P30419	NMT1	Glycylpeptide N-tetradecanoyltransferase 1					0.00282727	U	0.00705051	0.278409	H	-0.8	R
2445	Q9HC38	GLOD4	Glyoxalase domain-containing protein 4					7.30585e-05	T	0.000582226	0.584885	FC	-2.28571	H
2556	Q9UBQ7	GRHPR	Glyoxylate reductase/hydroxypyruvate reductase					0.000403448	T	0.00167933	0.553418	FC	-1.93639	H
2723	Q9Y625	GPC6	Glypican-6					0.865041	T	0.89282	0.957499	FC	-0.0771031	H
1259	P49915	GMPS	GMP synthase [glutamine-hydrolyzing]					0.0157455	T	0.0297143	0.465524	FC	-1.19229	H
2176	Q92896	GLG1	Golgi apparatus protein 1					0.321682	T	0.382648	0.818984	FC	-0.455732	H
50	O00461	GOLIM4	Golgi integral membrane protein 4					0.0216321	T	0.0383853	0.474879	FC	-1.12465	H
2091	Q8NBJ4	GOLM1	Golgi membrane protein 1					0.306761	U	0.367173	1.77606	H	0.28	R
2425	Q9H8Y8	GORASP2	Golgi reassembly-stacking protein 2					0.00201143	T	0.00572091	0.236093	FC	-1.61351	H
2405	Q9H3P7	ACBD3	Golgi resident protein GCP60					0.00291077	T	0.00760503	0.317603	FC	-1.53911	H
294	O95249	GOSR1	Golgi SNAP receptor complex member 1					0.00269926	T	0.0071732	0.203247	FC	-1.55432	H
2415	Q9H4G4	GLIPR2	Golgi-associated plant pathogenesis-related protein 1					0.0277028	T	0.0472081	1.59511	FC	1.07113	H
1658	Q08379	GOLGA2	Golgin subfamily A member 2	24	5	77	5	0.000162675	W	0.0016064	0.103974	FC	-2.63397	H
2151	Q92538	GBF1	Golgi-specific brefeldin A-resistance guanine nucleotide exchange factor 1					0.449427	T	0.512138	0.751809	FC	-0.345795	H
972	P28676	GCA	Grancalcin					0.185877	U	0.237708	0.605508	H	-0.36	R
188	O60565	GREM1	Gremlin-1					0.666346	T	0.719406	0.829562	FC	-0.196038	H
1682	Q12849	GRSF1	G-rich sequence factor 1					0.423849	U	0.489785	0.443585	H	-0.22	R
1509	P62993	GRB2	Growth factor receptor-bound protein 2					0.00210433	T	0.0059225	0.548771	FC	-1.60443	H
2402	Q9H3K2	GHITM	Growth hormone-inducible transmembrane protein					2.63269e-06	T	0.000164534	0.133659	FC	-3.00844	H
2438	Q9HAV7	GRPEL1	GrpE protein homolog 1, mitochondrial					0.000149393	U	0.00187244	0.000431706	H	-1	R
2597	Q9UIJ7	AK3	GTP:AMP phosphotransferase AK3, mitochondrial					0.00399421	T	0.0097261	0.539285	FC	-1.47515	H
2494	Q9NUV9	GIMAP4	GTPase IMAP family member 4					0.00323648	T	0.00822518	0.531225	FC	-1.5177	H
374	P01116	KRAS	GTPase KRas					0.0100888	T	0.0204783	0.664998	FC	-1.28544	H
1489	P62826	RAN	GTP-binding nuclear protein Ran					0.000109449	T	0.000751085	0.413335	FC	-2.20212	H
31	O00178	GTPBP1	GTP-binding protein 1					0.00219376	U	0.00582462	0.106699	H	-0.82	R
2470	Q9NR31	SAR1A	GTP-binding protein SAR1a					0.124795	T	0.170943	0.694095	FC	-0.720013	H
2729	Q9Y6B6	SAR1B	GTP-binding protein SAR1b					9.26578e-05	T	0.000686454	2.71454	FC	2.23648	H
2668	Q9Y2T3	GDA	Guanine deaminase					0.0605337	U	0.0898356	0.260856	H	-0.5	R
472	P04899	GNAI2	Guanine nucleotide-binding protein G(i) subunit alpha-2					0.241322	U	0.298103	0.838282	H	-0.32	R
2553	Q9UBI6	GNG12	Guanine nucleotide-binding protein G(I)/G(S)/G(O) subunit gamma-12					0.232049	T	0.290243	1.31285	FC	0.553122	H
1497	P62873	GNB1	Guanine nucleotide-binding protein G(I)/G(S)/G(T) subunit beta-1					0.000916327	T	0.00304679	0.685053	FC	-1.77135	H
1498	P62879	GNB2	Guanine nucleotide-binding protein G(I)/G(S)/G(T) subunit beta-2					0.126603	T	0.172996	0.832933	FC	-0.716347	H
591	P08754	GNAI3	Guanine nucleotide-binding protein G(k) subunit alpha					0.00102922	T	0.00332324	0.522984	FC	-1.74803	H
606	P09471	GNAO1	Guanine nucleotide-binding protein G(o) subunit alpha					0.039303	T	0.0634706	1.63308	FC	0.993931	H
1263	P50148	GNAQ	Guanine nucleotide-binding protein G(q) subunit alpha					0.178604	T	0.231835	0.756366	FC	-0.625963	H
1967	Q5JWF2	GNAS	Guanine nucleotide-binding protein G(s) subunit alpha isoforms XLas					0.0182521	T	0.0334941	0.658675	FC	-1.16097	H
989	P29992	GNA11	Guanine nucleotide-binding protein subunit alpha-11					0.175131	T	0.228373	0.7788	FC	-0.631271	H
1800	Q14344	GNA13	Guanine nucleotide-binding protein subunit alpha-13					0.736273	T	0.78131	1.07567	FC	0.152971	H
2436	Q9HAV0	GNB4	Guanine nucleotide-binding protein subunit beta-4					0.294087	T	0.354045	1.20406	FC	0.483315	H
1104	P36915	GNL1	Guanine nucleotide-binding protein-like 1					0.364289	T	0.426607	0.774686	FC	-0.416253	H
2345	Q9BVP2	GNL3	Guanine nucleotide-binding protein-like 3					0.195491	T	0.250232	0.605577	FC	-0.601273	H
1601	Q02108	GUCY1A1	Guanylate cyclase soluble subunit alpha-1					0.533354	T	0.594674	0.800739	FC	-0.284025	H
1924	Q16774	GUK1	Guanylate kinase					0.458121	U	0.524184	0.560537	H	-0.2	R
1049	P32455	GBP1	Guanylate-binding protein 1					0.368463	T	0.430953	0.749831	FC	-0.41256	H
1050	P32456	GBP2	Guanylate-binding protein 2					0.520683	T	0.582173	0.84635	FC	-0.292973	H
2261	Q96PP8	GBP5	Guanylate-binding protein 5					0.0695154	U	0.100893	0.00568471	H	-0.48	R
201	O60832	DKC1	H/ACA ribonucleoprotein complex subunit DKC1	25	3	30	1	0.000160922	W	0.0016064	0.162558	FC	-2.62243	H
2360	Q9BXW7	HDHD5	Haloacid dehalogenase-like hydrolase domain-containing 5					1.82192e-05	T	0.00029469	0.10736	FC	-2.57915	H
2327	Q9BSH5	HDHD3	Haloacid dehalogenase-like hydrolase domain-containing protein 3					0.000990375	U	0.00333564	0.103869	H	-0.88	R
355	P00738	HP	Haptoglobin					0.140465	U	0.186908	1.48884	H	0.4	R
356	P00739	HPR	Haptoglobin-related protein					0.273036	U	0.331417	2.38147	H	0.3	R
2417	Q9H583	HEATR1	HEAT repeat-containing protein 1					0.00148854	T	0.00446773	0.142177	FC	-1.67398	H
633	P0DMV9	HSPA1A	Heat shock 70 kDa protein 1B					0.670214	T	0.72248	0.959092	FC	-0.193609	H
1063	P34932	HSPA4	Heat shock 70 kDa protein 4					4.17749e-05	T	0.000436153	0.292036	FC	-2.40257	H
664	P11142	HSPA8	Heat shock cognate 71 kDa protein					0.000128613	T	0.000824164	0.509461	FC	-2.16894	H
237	O75506	HSBP1	Heat shock factor-binding protein 1					0.0166221	T	0.0311581	0.271	FC	-1.18083	H
2157	Q92598	HSPH1	Heat shock protein 105 kDa					0.00174446	T	0.00508588	0.169267	FC	-1.64213	H
1690	Q12931	TRAP1	Heat shock protein 75 kDa, mitochondrial					0.00579536	U	0.0125088	0.30022	H	-0.74	R
468	P04792	HSPB1	Heat shock protein beta-1					0.0961266	T	0.136493	1.68969	FC	0.785212	H
70	O14558	HSPB6	Heat shock protein beta-6					0.00668913	T	0.0148748	3.67871	FC	1.37014	H
2564	Q9UBY9	HSPB7	Heat shock protein beta-7					0.00800355	T	0.0171294	4.19698	FC	1.33329	H
2602	Q9UJY1	HSPB8	Heat shock protein beta-8					0.00731771	T	0.0158314	1.94808	FC	1.35172	H
550	P07900	HSP90AA1	Heat shock protein HSP 90-alpha					6.25111e-05	T	0.000547315	0.514001	FC	-2.31815	H
567	P08238	HSP90AB1	Heat shock protein HSP 90-beta					8.5148e-05	T	0.000649777	0.236027	FC	-2.25396	H
1349	P54652	HSPA2	Heat shock-related 70 kDa protein 2					0.427328	T	0.490356	1.28507	FC	0.363195	H
737	P14317	HCLS1	Hematopoietic lineage cell-specific protein					0.041359	T	0.0663884	0.682668	FC	-0.982506	H
614	P09601	HMOX1	Heme oxygenase 1					0.129122	U	0.174897	0.303846	H	-0.41	R
1016	P30519	HMOX2	Heme oxygenase 2					0.00401976	T	0.00976814	0.317211	FC	-1.47386	H
2476	Q9NRV9	HEBP1	Heme-binding protein 1					0.00583472	T	0.0132923	0.638784	FC	-1.39809	H
2720	Q9Y5Z4	HEBP2	Heme-binding protein 2					0.523191	T	0.584742	0.884109	FC	-0.291193	H
1541	P69905	HBA2	Hemoglobin subunit alpha					0.998828	T	1	1.00025	FC	0.000666119	H
1538	P68871	HBB	Hemoglobin subunit beta					0.721559	T	0.767154	1.05596	FC	0.161896	H
396	P02042	HBD	Hemoglobin subunit delta					0.238572	T	0.297072	1.2924	FC	0.545162	H
397	P02100	HBE1	Hemoglobin subunit epsilon					0.025075	T	0.0436352	2.36569	FC	1.09279	H
1539	P69891	HBG1	Hemoglobin subunit gamma-1					0.307489	U	0.367173	0.820492	H	-0.28	R
1540	P69892	HBG2	Hemoglobin subunit gamma-2					0.139868	U	0.186908	2.65737	H	0.4	R
435	P02790	HPX	Hemopexin					0.0842732	T	0.122336	1.4927	FC	0.81722	H
501	P05546	SERPIND1	Heparin cofactor 2					0.0172575	U	0.0304678	1.29041	H	0.64	R
92	O14964	HGS	Hepatocyte growth factor-regulated tyrosine kinase substrate					1.01933e-07	T	4.06714e-05	0.173093	FC	-3.80217	H
1304	P51858	HDGF	Hepatoma-derived growth factor					8.85331e-05	T	0.000666504	0.353462	FC	-2.24589	H
2039	Q7Z4V5	HDGFL2	Hepatoma-derived growth factor-related protein 2					0.000134661	T	0.000840128	0.267794	FC	-2.15951	H
2688	Q9Y3E1	HDGFL3	Hepatoma-derived growth factor-related protein 3					0.362081	U	0.425808	1.01812	H	0.24	R
1970	Q5SSJ5	HP1BP3	Heterochromatin protein 1-binding protein 3					0.00050044	T	0.00195214	0.552363	FC	-1.89295	H
2296	Q99729	HNRNPAB	Heterogeneous nuclear ribonucleoprotein A/B	28	4	551	1	0.000194205	W	0.00170256	0.20814	FC	-2.55437	H
1702	Q13151	HNRNPA0	Heterogeneous nuclear ribonucleoprotein A0					5.89214e-06	T	0.000189158	0.192409	FC	-2.82636	H
617	P09651	HNRNPA1	Heterogeneous nuclear ribonucleoprotein A1					0.000167698	T	0.000956679	0.371326	FC	-2.1146	H
1309	P51991	HNRNPA3	Heterogeneous nuclear ribonucleoprotein A3					0.00011675	T	0.000778242	0.35885	FC	-2.18883	H
1773	Q14103	HNRNPD	Heterogeneous nuclear ribonucleoprotein D0					5.26398e-05	T	0.000505233	0.327895	FC	-2.35405	H
95	O14979	HNRNPDL	Heterogeneous nuclear ribonucleoprotein D-like					0.000101336	T	0.000712927	0.197925	FC	-2.21799	H
1317	P52597	HNRNPF	Heterogeneous nuclear ribonucleoprotein F	59	19	546	19	0.000146944	W	0.0015897	0.302599	FC	-2.57685	H
1037	P31943	HNRNPH1	Heterogeneous nuclear ribonucleoprotein H					1.7855e-05	T	0.00029469	0.302111	FC	-2.5835	H
1380	P55795	HNRNPH2	Heterogeneous nuclear ribonucleoprotein H2					1.79467e-05	T	0.00029469	0.254533	FC	-2.5824	H
1036	P31942	HNRNPH3	Heterogeneous nuclear ribonucleoprotein H3					6.39295e-05	T	0.00055043	0.370184	FC	-2.31348	H
1454	P61978	HNRNPK	Heterogeneous nuclear ribonucleoprotein K					1.47088e-05	T	0.000289132	0.313498	FC	-2.62537	H
748	P14866	HNRNPL	Heterogeneous nuclear ribonucleoprotein L					5.86541e-05	T	0.000540983	0.30811	FC	-2.33144	H
1311	P52272	HNRNPM	Heterogeneous nuclear ribonucleoprotein M					3.44135e-05	T	0.000395493	0.406733	FC	-2.44347	H
186	O60506	SYNCRIP	Heterogeneous nuclear ribonucleoprotein Q					3.06365e-05	T	0.000375043	0.356502	FC	-2.46809	H
134	O43390	HNRNPR	Heterogeneous nuclear ribonucleoprotein R					3.71418e-07	T	8.64476e-05	0.251482	FC	-3.47415	H
1586	Q00839	HNRNPU	Heterogeneous nuclear ribonucleoprotein U	14	6	16	6	0.000287198	W	0.00202372	0.244703	FC	-2.40411	H
2337	Q9BUJ2	HNRNPUL1	Heterogeneous nuclear ribonucleoprotein U-like protein 1					0.000144957	T	0.000881283	0.333963	FC	-2.14441	H
1934	Q1KMD3	HNRNPUL2	Heterogeneous nuclear ribonucleoprotein U-like protein 2					0.00040015	T	0.00167058	0.447482	FC	-1.93805	H
886	P22626	HNRNPA2B1	Heterogeneous nuclear ribonucleoproteins A2/B1					9.09125e-05	T	0.000679449	0.344814	FC	-2.24041	H
551	P07910	HNRNPC	Heterogeneous nuclear ribonucleoproteins C1/C2					1.08219e-05	T	0.000249798	0.295231	FC	-2.69215	H
824	P19367	HK1	Hexokinase-1					0.38452	T	0.447302	1.15991	FC	0.398608	H
1321	P52789	HK2	Hexokinase-2	15	6	54	6	0.000402333	W	0.00240906	0.167606	FC	-2.29796	H
1322	P52790	HK3	Hexokinase-3					0.538402	T	0.599584	1.18193	FC	0.280493	H
1004	P30273	FCER1G	High affinity immunoglobulin epsilon receptor subunit gamma					0.0521035	U	0.0786622	0.398937	H	-0.52	R
603	P09429	HMGB1	High mobility group protein B1					0.000255613	T	0.00126359	0.334566	FC	-2.02876	H
938	P26583	HMGB2	High mobility group protein B2					0.0302777	T	0.0509125	0.56696	FC	-1.0517	H
113	O15347	HMGB3	High mobility group protein B3					0.000328789	U	0.00187244	0.000526856	H	-0.94	R
792	P17096	HMGA1	High mobility group protein HMG-I/HMG-Y					0.0534633	T	0.0824988	0.473947	FC	-0.924228	H
1112	P37235	HPCAL1	Hippocalcin-like protein 1					0.00728456	U	0.0149711	0.409905	H	-0.72	R
1262	P50135	HNMT	Histamine N-methyltransferase					0.118697	T	0.163311	0.642435	FC	-0.732719	H
1253	P49773	HINT1	Histidine triad nucleotide-binding protein 1	21	9	37	9	0.00354946	W	0.00997349	0.576104	FC	-1.69981	H
2354	Q9BX68	HINT2	Histidine triad nucleotide-binding protein 2, mitochondrial					5.70711e-06	T	0.000189158	0.295428	FC	-2.83347	H
453	P04196	HRG	Histidine-rich glycoprotein					0.00766389	T	0.0164529	1.65459	FC	1.34222	H
690	P12081	HARS1	Histidine--tRNA ligase, cytoplasmic					0.0195213	T	0.0354968	0.511944	FC	-1.14664	H
87	O14929	HAT1	Histone acetyltransferase type B catalytic subunit					0.0104783	U	0.0205374	0.00124009	H	-0.61	R
1739	Q13547	HDAC1	Histone deacetylase 1					2.31256e-05	T	0.000338166	0.185629	FC	-2.528	H
2167	Q92769	HDAC2	Histone deacetylase 2					0.00982206	T	0.0200387	0.0730075	FC	-1.291	H
46	O00422	SAP18	Histone deacetylase complex subunit SAP18					0.0175568	U	0.0309766	0.0767801	H	-0.63	R
532	P07305	H1-0	Histone H1.0					0.203154	T	0.258972	1.36439	FC	0.590627	H
780	P16403	H1-2	Histone H1.2					0.00324808	T	0.00824717	0.495309	FC	-1.51698	H
779	P16402	H1-3	Histone H1.3					0.241322	U	0.298103	0.598393	H	-0.32	R
649	P10412	H1-4	Histone H1.4					0.0257481	U	0.0426792	4.62404	H	0.6	R
778	P16401	H1-5	Histone H1.5					0.000870829	T	0.00294427	0.320454	FC	-1.78158	H
2149	Q92522	H1-10	Histone H1x					0.0471353	T	0.0740015	0.690142	FC	-0.952992	H
473	P04908	H2AC4	Histone H2A type 1-B/E					0.00288912	T	0.00758351	0.485049	FC	-1.54061	H
1983	Q6FI13	H2AC18	Histone H2A type 2-A					0.031209	U	0.0505022	0.35886	H	-0.58	R
2059	Q8IUE6	H2AC21	Histone H2A type 2-B					0.00330944	T	0.00835738	0.409458	FC	-1.5132	H
629	P0C0S5	H2AZ1	Histone H2A.Z					0.00300679	T	0.0077687	0.535843	FC	-1.53256	H
771	P16104	H2AX	Histone H2AX					0.850107	U	0.883643	0.86989	H	-0.06	R
199	O60814	H2BC12	Histone H2B type 1-K					0.005427	T	0.0125477	0.494145	FC	-1.41286	H
2078	Q8N257	H2BC26	Histone H2B type 3-B					0.00446471	T	0.0106767	0.219772	FC	-1.45256	H
1537	P68431	H3C1	Histone H3.1					0.0139953	T	0.0267957	0.566406	FC	-1.21712	H
2019	Q71DI3	H3C13	Histone H3.2					0.0133068	U	0.0250275	0.0349812	H	-0.66	R
1571	P84243	H3-3B	Histone H3.3					0.344704	U	0.405714	0.494909	H	-0.26	R
1487	P62805	H4C8	Histone H4					0.0213707	T	0.0380423	0.513031	FC	-1.12726	H
2054	Q86X55	CARM1	Histone-arginine methyltransferase CARM1					0.00180796	T	0.00523822	0.2307	FC	-1.63494	H
1666	Q09028	RBBP4	Histone-binding protein RBBP4					0.00284255	T	0.0074828	0.383855	FC	-1.54389	H
1911	Q16576	RBBP7	Histone-binding protein RBBP7					0.000120993	T	0.0007989	0.472678	FC	-2.18149	H
154	O43719	HTATSF1	HIV Tat-specific factor 1					0.00491056	X	0.249367	only in B		0
1007	P30443	HLA-A	HLA class I histocompatibility antigen, A-1 alpha chain					0.279559	U	0.339187	1	H	-0.21	R
724	P13746	HLA-A	HLA class I histocompatibility antigen, A-11 alpha chain					0.842942	U	0.883643	1	H	0.06	R
500	P05534	HLA-A	HLA class I histocompatibility antigen, A-24 alpha chain					0.0977702	U	0.13681	0.124609	H	-0.42	R
464	P04439	HLA-A	HLA class I histocompatibility antigen, A-3 alpha chain					4.33713e-05	T	0.000443722	0.452217	FC	-2.39468	H
1008	P30453	HLA-A	HLA class I histocompatibility antigen, A-34 alpha chain					0.10411	U	0.143524	0.540457	H	-0.44	R
392	P01891	HLA-A	HLA class I histocompatibility antigen, A-68 alpha chain					1	U	1	1	H	-0.01	R
647	P10316	HLA-A	HLA class I histocompatibility antigen, A-69 alpha chain					0.0091085	U	0.0179029	0.165932	H	-0.7	R
1009	P30461	HLA-B-13	HLA class I histocompatibility antigen, B-13 alpha chain					0.977792	T	0.991638	0.989206	FC	-0.0126236	H
1010	P30466	HLA-B	HLA class I histocompatibility antigen, B-18 alpha chain					0.909038	U	0.935858	1	H	-0.04	R
1011	P30479	HLA-B-41	HLA class I histocompatibility antigen, B-41 alpha chain					0.0290636	T	0.0490778	0.502609	FC	-1.06066	H
1012	P30481	HLA-B	HLA class I histocompatibility antigen, B-44 alpha chain					0.026531	U	0.0438988	716.702	H	0.53	R
1013	P30486	HLA-B	HLA class I histocompatibility antigen, B-48 alpha chain					0.608242	U	0.666727	1	H	0.12	R
648	P10319	HLA-B	HLA class I histocompatibility antigen, B-58 alpha chain					0.00220222	U	0.00582462	0.142284	H	-0.82	R
391	P01889	HLA-B	HLA class I histocompatibility antigen, B-7 alpha chain					0.715961	T	0.761756	1.14498	FC	0.16531	H
1015	P30510	HLA-C	HLA class I histocompatibility antigen, Cw-14 alpha chain					0.153041	U	0.202868	0.371953	H	-0.38	R
1014	P30504	HLA-C	HLA class I histocompatibility antigen, Cw-4 alpha chain					0.00100798	U	0.00333564	0.406379	H	-0.88	R
457	P04233	CD74	HLA class II histocompatibility antigen gamma chain					0.130798	T	0.177857	0.602745	FC	-0.708008	H
837	P20036	HLA-DPA1	HLA class II histocompatibility antigen, DP alpha 1 chain					0.0642434	T	0.0967809	0.616098	FC	-0.88166	H
465	P04440	HLA-DPB1	HLA class II histocompatibility antigen, DP beta 1 chain					0.000296925	U	0.00187244	0.00827199	H	-0.96	R
395	P01920	HLA-DQB1	HLA class II histocompatibility antigen, DQ beta 1 chain					0.837614	T	0.870981	0.919245	FC	-0.0929917	H
393	P01903	HLA-DRA	HLA class II histocompatibility antigen, DR alpha chain					0.0172496	T	0.032164	0.521698	FC	-1.17297	H
1549	P79483	HLA-DRB3	HLA class II histocompatibility antigen, DR beta 3 chain					0.786908	U	0.831529	1	H	0.08	R
727	P13762	HLA-DRB4	HLA class II histocompatibility antigen, DR beta 4 chain					0.38494	U	0.445561	1	H	0.22	R
456	P04229	HLA-DRB1	HLA class II histocompatibility antigen, DRB1-1 beta chain					0.894155	U	0.927703	1	H	-0.04	R
838	P20039	HLA-DRB1	HLA class II histocompatibility antigen, DRB1-11 beta chain					0.0628972	T	0.0952152	0.409162	FC	-0.886608	H
2188	Q95IE3	HLA-DRB1	HLA class II histocompatibility antigen, DRB1-12 beta chain					0.026531	U	0.0438988	0.00173605	H	-0.53	R
1977	Q5Y7A7	HLA-DRB1	HLA class II histocompatibility antigen, DRB1-13 beta chain					0.197072	U	0.251679	0.279918	H	-0.35	R
394	P01911	HLA-DRB1	HLA class II histocompatibility antigen, DRB1-15 beta chain					0.114464	U	0.157487	0.655594	H	-0.38	R
725	P13760	HLA-DRB1	HLA class II histocompatibility antigen, DRB1-4 beta chain					0.0539026	U	0.0801223	0.592958	H	-0.52	R
726	P13761	HLA-DRB1	HLA class II histocompatibility antigen, DRB1-7 beta chain					0.584588	U	0.642016	0.978588	H	-0.15	R
2544	Q9TQE0	HLA-DRB1	HLA class II histocompatibility antigen, DRB1-9 beta chain					0.654826	U	0.711368	1	H	0.1	R
1299	P51610	HCFC1	Host cell factor 1					0.00116666	T	0.00364893	0.402068	FC	-1.72288	H
1272	P50502	ST13	Hsc70-interacting protein					9.26236e-05	T	0.000686454	0.671738	FC	-2.23655	H
2522	Q9NZL4	HSPBP1	Hsp70-binding protein 1					0.0638933	T	0.0964094	0.515814	FC	-0.882938	H
1908	Q16543	CDC37	Hsp90 co-chaperone Cdc37					0.114076	T	0.157808	0.699154	FC	-0.742724	H
2506	Q9NX55	HYPK	Huntingtin-interacting protein K					0.00022316	T	0.00115424	0.250942	FC	-2.05635	H
1928	Q16836	HADH	Hydroxyacyl-coenzyme A dehydrogenase, mitochondrial					0.000392156	T	0.00165264	0.232453	FC	-1.94212	H
1925	Q16775	HAGH	Hydroxyacylglutathione hydrolase, mitochondrial					0.0451546	U	0.0682819	5.83338	H	0.54	R
1091	P35914	HMGCL	Hydroxymethylglutaryl-CoA lyase, mitochondrial					0.0022292	T	0.00617675	0.139194	FC	-1.59284	H
1354	P54868	HMGCS2	Hydroxymethylglutaryl-CoA synthase, mitochondrial					0.0172575	U	0.0304678	0.409732	H	-0.64	R
2016	Q6YN16	HSDL2	Hydroxysteroid dehydrogenase-like protein 2					0.00302238	T	0.00778738	0.248399	FC	-1.53152	H
349	P00492	HPRT1	Hypoxanthine-guanine phosphoribosyltransferase					7.19438e-05	T	0.000581611	0.341117	FC	-2.28891	H
2699	Q9Y4L1	HYOU1	Hypoxia up-regulated protein 1					0.00281461	T	0.00742323	0.424672	FC	-1.54588	H
2743	Q9Y6R7	FCGBP	IgGFc-binding protein					0.230647	T	0.288619	0.63188	FC	-0.554855	H
634	P0DOX2		Immunoglobulin alpha-2 heavy chain					0.344704	U	0.405714	0.814733	H	-0.26	R
635	P0DOX3		Immunoglobulin delta heavy chain					0.145991	U	0.194076	17.0471	H	0.37	R
636	P0DOX5		Immunoglobulin gamma-1 heavy chain					0.0268646	T	0.046105	1.63013	FC	1.07782	H
390	P01876	IGHA1	Immunoglobulin heavy constant alpha 1					0.697089	T	0.745395	0.918217	FC	-0.176893	H
386	P01859	IGHG2	Immunoglobulin heavy constant gamma 2					0.00672269	T	0.0149138	1.80076	FC	1.36911	H
387	P01860	IGHG3	Immunoglobulin heavy constant gamma 3					0.00924403	T	0.0190966	1.83398	FC	1.30356	H
388	P01861	IGHG4	Immunoglobulin heavy constant gamma 4					0.0151879	T	0.0288179	2.71641	FC	1.1999	H
389	P01871	IGHM	Immunoglobulin heavy constant mu					0.0121032	T	0.0238393	1.80129	FC	1.24755	H
641	P0DP03	IGHV3-30-5	Immunoglobulin heavy variable 3-30-5					0.0451546	U	0.0682819	1.79172	H	0.54	R
1	A0A0A0MS15	IGHV3-49	Immunoglobulin heavy variable 3-49					0.000902676	U	0.00330429	1164.02	H	0.86	R
382	P01780	IGHV3-7	Immunoglobulin heavy variable 3-7					0.608506	T	0.665007	1.10945	FC	0.233137	H
2	A0A0B4J1X5	IGHV3-74	Immunoglobulin heavy variable 3-74					0.240605	T	0.299203	1.36834	FC	0.542715	H
383	P01782	IGHV3-9	Immunoglobulin heavy variable 3-9					0.860998	T	0.889425	0.939153	FC	-0.0794383	H
506	P06331	IGHV4-34	Immunoglobulin heavy variable 4-34					0.219395	T	0.277021	1.38111	FC	0.56907	H
7	A0A0J9YXX1	IGHV5-10-1	Immunoglobulin heavy variable 5-10-1					0.10411	U	0.143524	2.49875	H	0.44	R
5	A0A0C4DH38	IGHV5-51	Immunoglobulin heavy variable 5-51					0.0947352	T	0.134791	1.8518	FC	0.788785	H
377	P01591	JCHAIN	Immunoglobulin J chain					0.266038	T	0.325326	0.726317	FC	-0.513356	H
385	P01834	IGKC	Immunoglobulin kappa constant					3.40369e-05	T	0.000395493	2.68142	FC	2.44579	H
638	P0DOX7		Immunoglobulin kappa light chain					0.00585857	T	0.0133358	1.60233	FC	1.39725	H
378	P01599	IGKV1-17	Immunoglobulin kappa variable 1-17					0.0642338	T	0.0967809	2.71518	FC	0.881695	H
379	P01602	IGKV1-5	Immunoglobulin kappa variable 1-5					0.234266	U	0.293938	1	H	0.23	R
6	A0A0C4DH67	IGKV1-8	Immunoglobulin kappa variable 1-8					0.0344025	T	0.0567327	1.52367	FC	1.02356	H
462	P04432	IGKV1D-39	Immunoglobulin kappa variable 1D-39					0.00908243	U	0.0179029	2.17083	H	0.7	R
463	P04433	IGKV3-11	Immunoglobulin kappa variable 3-11					0.0755516	U	0.10826	5.35969	H	0.48	R
380	P01619	IGKV3-20	Immunoglobulin kappa variable 3-20					0.96985	U	0.986091	1.00859	H	0.02	R
4	A0A0C4DH25	IGKV3D-20	Immunoglobulin kappa variable 3D-20					0.0334474	T	0.0554742	1.5802	FC	1.02978	H
505	P06312	IGKV4-1	Immunoglobulin kappa variable 4-1					0.00755972	T	0.0162919	2.02147	FC	1.34503	H
640	P0DOY2	IGLC2	Immunoglobulin lambda constant 2					0.0186331	T	0.0340479	1.6351	FC	1.15657	H
11	A0M8Q6	IGLC7	Immunoglobulin lambda constant 7					0.472676	U	0.534055	0.735937	H	-0.2	R
381	P01721	IGLV6-57	Immunoglobulin lambda variable 6-57					0.212294	U	0.267089	1.24839	H	0.34	R
639	P0DOX8		Immunoglobulin lambda-1 light chain					0.0381869	T	0.0620093	1.46535	FC	1.00037	H
637	P0DOX6		Immunoglobulin mu heavy chain					0.0358671	T	0.0588237	2.2402	FC	1.01431	H
69	O14498	ISLR	Immunoglobulin superfamily containing leucine-rich repeat protein					0.969195	U	0.986091	1	H	-0.02	R
1312	P52292	KPNA2	Importin subunit alpha-1					0.0538124	U	0.0801223	0.449753	H	-0.52	R
63	O00629	KPNA4	Importin subunit alpha-3					0.000186953	T	0.00102787	0.388802	FC	-2.09241	H
55	O00505	KPNA3	Importin subunit alpha-4					0.00629298	T	0.0141399	0.382366	FC	-1.38263	H
192	O60684	KPNA6	Importin subunit alpha-7					0.000794377	T	0.00273913	0.225061	FC	-1.80003	H
1826	Q14974	KPNB1	Importin subunit beta-1					0.000648607	T	0.00236496	0.450061	FC	-1.84076	H
2125	Q8TEX9	IPO4	Importin-4					0.0250154	T	0.0435858	0.424752	FC	-1.09331	H
45	O00410	IPO5	Importin-5					9.66322e-05	T	0.000702473	0.31513	FC	-2.2278	H
303	O95373	IPO7	Importin-7					0.0114588	T	0.0227466	0.06678	FC	-1.25897	H
2258	Q96P70	IPO9	Importin-9					0.00301771	T	0.00778738	0.244636	FC	-1.53183	H
2093	Q8NBJ7	SUMF2	Inactive C-alpha-formylglycine-generating enzyme 2					0.0211339	U	0.0359264	0.323552	H	-0.62	R
1718	Q13308	PTK7	Inactive tyrosine-protein kinase 7					0.267355	U	0.329533	1	H	-0.27	R
2018	Q70UQ0	IKBIP	Inhibitor of nuclear factor kappa-B kinase-interacting protein					0.236986	T	0.295229	1.53308	FC	0.547081	H
1854	Q15181	PPA1	Inorganic pyrophosphatase					0.000300652	T	0.00139488	0.283047	FC	-1.99586	H
2399	Q9H2U2	PPA2	Inorganic pyrophosphatase 2, mitochondrial					0.000397111	T	0.00166536	0.43577	FC	-1.93959	H
2361	Q9BY32	ITPA	Inosine triphosphate pyrophosphatase					0.00220222	U	0.00582462	0.181244	H	-0.82	R
697	P12268	IMPDH2	Inosine-5'-monophosphate dehydrogenase 2					0.00111165	T	0.00352024	0.462902	FC	-1.73257	H
1808	Q14571	ITPR2	Inositol 1,4,5-trisphosphate receptor type 2					0.161341	U	0.211892	0.51071	H	-0.38	R
1809	Q14573	ITPR3	Inositol 1,4,5-trisphosphate receptor type 3					0.899125	T	0.924275	0.942891	FC	-0.0574976	H
979	P29218	IMPA1	Inositol monophosphatase 1					0.00131495	U	0.00397472	0.525483	H	-0.86	R
2457	Q9NPH2	ISYNA1	Inositol-3-phosphate synthase 1					0.212294	U	0.267089	1.38063	H	0.34	R
745	P14735	IDE	Insulin-degrading enzyme					0.0016994	U	0.00484797	0.115439	H	-0.84	R
2740	Q9Y6M1	IGF2BP2	Insulin-like growth factor 2 mRNA-binding protein 2					0.00824891	T	0.0175542	0.082694	FC	-1.32707	H
1901	Q16270	IGFBP7	Insulin-like growth factor-binding protein 7					0.691417	T	0.740179	0.878986	FC	-0.180399	H
1385	P56199	ITGA1	Integrin alpha-1					0.429984	T	0.492999	1.18129	FC	0.361074	H
796	P17301	ITGA2	Integrin alpha-2					0.00200668	T	0.0057132	0.418072	FC	-1.61399	H
586	P08648	ITGA5	Integrin alpha-5					0.000192368	T	0.00104755	2.91984	FC	2.08658	H
895	P23229	ITGA6	Integrin alpha-6					0.00270369	T	0.00717815	0.104833	FC	-1.55399	H
1758	Q13683	ITGA7	Integrin alpha-7					0.00195002	T	0.0055918	3.17445	FC	1.61974	H
576	P08514	ITGA2B	Integrin alpha-IIb					0.244033	U	0.30132	1	H	0.26	R
671	P11215	ITGAM	Integrin alpha-M					0.96985	U	0.986091	0.98458	H	-0.02	R
522	P06756	ITGAV	Integrin alpha-V					0.0309861	T	0.0519472	1.29286	FC	1.04662	H
502	P05556	ITGB1	Integrin beta-1					0.0201935	T	0.0364109	1.31673	FC	1.1394	H
480	P05107	ITGB2	Integrin beta-2					0.550992	T	0.61044	0.830808	FC	-0.271762	H
479	P05106	ITGB3	Integrin beta-3					0.0974913	T	0.13801	1.84628	FC	0.781751	H
772	P16144	ITGB4	Integrin beta-4					0.00220222	U	0.00582462	0.192363	H	-0.82	R
1725	Q13418	ILK	Integrin-linked protein kinase					0.0118968	T	0.023484	1.52059	FC	1.25114	H
2136	Q8WWA0	ITLN1	Intelectin-1					0.161972	U	0.211892	0.470469	H	-0.38	R
833	P19827	ITIH1	Inter-alpha-trypsin inhibitor heavy chain H1					0.0106583	T	0.0214163	1.92585	FC	1.27404	H
832	P19823	ITIH2	Inter-alpha-trypsin inhibitor heavy chain H2					0.00122072	T	0.00379675	2.20814	FC	1.71379	H
1637	Q06033	ITIH3	Inter-alpha-trypsin inhibitor heavy chain H3					0.0211339	U	0.0359264	2.12888	H	0.62	R
1810	Q14624	ITIH4	Inter-alpha-trypsin inhibitor heavy chain H4					0.755842	T	0.798437	1.07103	FC	0.141197	H
493	P05362	ICAM1	Intercellular adhesion molecule 1					0.476416	T	0.539809	0.787704	FC	-0.325244	H
2041	Q7Z5L9	IRF2BP2	Interferon regulatory factor 2-binding protein 2					0.00390324	T	0.00957133	0.129019	FC	-1.47982	H
845	P20591	MX1	Interferon-induced GTP-binding protein Mx1					0.384673	U	0.445436	0.659354	H	-0.24	R
710	P13164	IFITM1	Interferon-induced transmembrane protein 1					0.000149393	U	0.00187244	0.000310138	H	-1	R
1596	Q01628	IFITM3	Interferon-induced transmembrane protein 3					0.0279786	T	0.047504	0.182157	FC	-1.06897	H
827	P19525	EIF2AK2	Interferon-induced, double-stranded RNA-activated protein kinase					0.344704	U	0.405714	0.654408	H	-0.26	R
241	O75569	PRKRA	Interferon-inducible double-stranded RNA-dependent protein kinase activator A					0.00196316	T	0.00562369	0.282919	FC	-1.6184	H
1687	Q12905	ILF2	Interleukin enhancer-binding factor 2					2.18296e-05	T	0.000324309	0.27296	FC	-2.54034	H
1688	Q12906	ILF3	Interleukin enhancer-binding factor 3					0.000355081	T	0.00155445	0.339803	FC	-1.96219	H
1935	Q27J81	INF2	Inverted formin-2					0.00402197	T	0.00976814	0.338732	FC	-1.47375	H
540	P07476	IVL	Involucrin					0.00032348	X	0.0564675	only in B		0
1937	Q2TAA2	IAH1	Isoamyl acetate-hydrolyzing esterase 1 homolog					0.0557124	T	0.0855912	0.574576	FC	-0.914745	H
2217	Q96CN7	ISOC1	Isochorismatase domain-containing protein 1					0.00105582	T	0.00338564	0.369781	FC	-1.74291	H
2200	Q96AB3	ISOC2	Isochorismatase domain-containing protein 2					0.000898015	T	0.00300378	0.327306	FC	-1.7754	H
1264	P50213	IDH3A	Isocitrate dehydrogenase [NAD] subunit alpha, mitochondrial					0.000162885	T	0.000945287	0.560073	FC	-2.12055	H
166	O43837	IDH3B	Isocitrate dehydrogenase [NAD] subunit beta, mitochondrial					3.47738e-05	T	0.000396422	0.155791	FC	-2.44126	H
1292	P51553	IDH3G	Isocitrate dehydrogenase [NAD] subunit gamma, mitochondrial					0.000217944	T	0.0011374	0.255925	FC	-2.06116	H
255	O75874	IDH1	Isocitrate dehydrogenase [NADP] cytoplasmic					6.00144e-06	T	0.000189193	0.540447	FC	-2.82226	H
1225	P48735	IDH2	Isocitrate dehydrogenase [NADP], mitochondrial					0.000209041	T	0.00110581	0.536489	FC	-2.06965	H
1149	P41252	IARS1	Isoleucine--tRNA ligase, cytoplasmic					4.4138e-05	T	0.000446657	0.236795	FC	-2.39099	H
2480	Q9NSE4	IARS2	Isoleucine--tRNA ligase, mitochondrial					0.000208571	T	0.00110581	0.300047	FC	-2.07011	H
1768	Q13907	IDI1	Isopentenyl-diphosphate Delta-isomerase 1					0.0021052	T	0.0059225	0.226212	FC	-1.60435	H
936	P26440	IVD	Isovaleryl-CoA dehydrogenase, mitochondrial					5.50571e-05	T	0.000521269	0.441271	FC	-2.34466	H
1340	P53990	IST1	IST1 homolog					8.63762e-05	T	0.000653791	0.460333	FC	-2.25099	H
750	P14923	JUP	Junction plakoglobin					0.000281942	W	0.00200884	0.132917	FC	-2.46926	H
2722	Q9Y624	F11R	Junctional adhesion molecule A					0.00220222	U	0.00582462	0.139458	H	-0.82	R
2606	Q9UK76	JPT1	Jupiter microtubule associated homolog 1	59	9	201	9	0.000551099	W	0.00286633	0.0565633	FC	-2.31245	H
2426	Q9H910	JPT2	Jupiter microtubule associated homolog 2					0.000321258	T	0.0014519	0.249022	FC	-1.98243	H
2433	Q9HA64	FN3KRP	Ketosamine-3-kinase					0.00110783	T	0.00351609	0.499299	FC	-1.73326	H
1649	Q07666	KHDRBS1	KH domain-containing, RNA-binding, signal transduction-associated protein 1					2.97632e-05	T	0.000374453	0.262083	FC	-2.47423	H
2048	Q86UP2	KTN1	Kinectin					0.00637497	T	0.0142785	0.67141	FC	-1.37999	H
1651	Q07866	KLC1	Kinesin light chain 1					0.00834455	T	0.0176563	0.517603	FC	-1.3247	H
2481	Q9NSK0	KLC4	Kinesin light chain 4					0.000281645	U	0.00187244	0.00106327	H	-0.94	R
1053	P33176	KIF5B	Kinesin-1 heavy chain					0.000662817	T	0.00239596	0.43395	FC	-1.83641	H
2463	Q9NQT8	KIF13B	Kinesin-like protein KIF13B					0.00577698	U	0.0125088	0.445351	H	-0.74	R
373	P01042	KNG1	Kininogen-1					0.00995346	T	0.0202477	1.80505	FC	1.28825	H
1979	Q63ZY3	KANK2	KN motif and ankyrin repeat domain-containing protein 2					0.490493	T	0.553067	1.29676	FC	0.3148	H
434	P02788	LTF	Lactotransferrin					0.96985	U	0.986091	1.00704	H	0.02	R
1625	Q04760	GLO1	Lactoylglutathione lyase					0.000743875	T	0.00261668	0.564625	FC	-1.81322	H
56	O00515	LAD1	Ladinin-1					0.000149393	U	0.00187244	0.000387823	H	-1	R
2665	Q9Y2S2	CRYL1	Lambda-crystallin homolog					0.0756616	U	0.10826	0.623873	H	-0.48	R
1153	P42166	TMPO	Lamina-associated polypeptide 2, isoform alpha					0.680964	T	0.73264	0.838117	FC	-0.18689	H
1154	P42167	TMPO	Lamina-associated polypeptide 2, isoforms beta/gamma					1.54156e-05	T	0.000290154	0.26972	FC	-2.61521	H
849	P20700	LMNB1	Lamin-B1					0.000550824	T	0.00208462	0.353695	FC	-1.87364	H
1618	Q03252	LMNB2	Lamin-B2					0.472676	U	0.534055	1.11083	H	0.2	R
1903	Q16363	LAMA4	Laminin subunit alpha-4					3.49803e-05	T	0.000397154	2.38717	FC	2.44001	H
109	O15230	LAMA5	Laminin subunit alpha-5					0.103409	T	0.145428	1.4789	FC	0.767213	H
553	P07942	LAMB1	Laminin subunit beta-1					0.0091085	U	0.0179029	2.83531	H	0.7	R
1374	P55268	LAMB2	Laminin subunit beta-2					0.0282486	T	0.0478461	1.52981	FC	1.06687	H
662	P11047	LAMC1	Laminin subunit gamma-1					0.00266875	T	0.00710564	1.79405	FC	1.55661	H
1929	Q16850	CYP51A1	Lanosterol 14-alpha demethylase					0.00381917	U	0.00908598	0.00166175	H	-0.74	R
2005	Q6PKG0	LARP1	La-related protein 1					0.00378547	T	0.00932347	0.390615	FC	-1.48602	H
1187	P46379	BAG6	Large proline-rich protein BAG6					0.000753825	T	0.0026417	0.27069	FC	-1.81055	H
1821	Q14766	LTBP1	Latent-transforming growth factor beta-binding protein 1					0.303825	U	0.367173	0.29217	H	-0.28	R
1822	Q14767	LTBP2	Latent-transforming growth factor beta-binding protein 2					0.0657066	T	0.0986659	0.460593	FC	-0.876386	H
2325	Q9BS40	LXN	Latexin					0.0848929	T	0.12316	0.692812	FC	-0.815453	H
2287	Q99538	LGMN	Legumain					0.195817	T	0.250534	0.679052	FC	-0.600813	H
985	P29536	LMOD1	Leiomodin-1					0.00738948	T	0.0159743	2.80539	FC	1.34971	H
2099	Q8NC56	LEMD2	LEM domain-containing protein 2					0.763755	T	0.806185	1.09589	FC	0.136466	H
1994	Q6P1M3	LLGL2	Lethal(2) giant larvae protein homolog 2					0.000565815	U	0.00242604	0.000527171	H	-0.88	R
422	P02750	LRG1	Leucine-rich alpha-2-glycoprotein					0.384673	U	0.445436	0.687873	H	-0.24	R
1162	P42704	LRPPRC	Leucine-rich PPR motif-containing protein, mitochondrial					3.80839e-05	T	0.000419361	0.16856	FC	-2.42206	H
1939	Q32MZ4	LRRFIP1	Leucine-rich repeat flightless-interacting protein 1					0.173078	T	0.226102	1.23009	FC	0.634449	H
2077	Q8N1G4	LRRC47	Leucine-rich repeat-containing protein 47					0.000197513	T	0.00106737	0.300533	FC	-2.08121	H
2203	Q96AG4	LRRC59	Leucine-rich repeat-containing protein 59					0.000351811	T	0.00154498	0.271416	FC	-1.96406	H
2541	Q9P2J5	LARS1	Leucine--tRNA ligase, cytoplasmic					0.562589	T	0.620091	0.88758	FC	-0.263813	H
2598	Q9UIQ6	LNPEP	Leucyl-cystinyl aminopeptidase					0.558138	T	0.616645	1.24516	FC	0.266853	H
1022	P30740	SERPINB1	Leukocyte elastase inhibitor					0.00455383	T	0.0108254	0.506898	FC	-1.44855	H
1661	Q08722	CD47	Leukocyte surface antigen CD47					0.0186392	T	0.0340479	0.676515	FC	-1.1565	H
625	P09960	LTA4H	Leukotriene A-4 hydrolase					0.00294634	T	0.00766928	0.589089	FC	-1.53666	H
2528	Q9NZU5	LMCD1	LIM and cysteine-rich domains protein 1					0.73373	U	0.779501	1.35851	H	0.1	R
1212	P48059	LIMS1	LIM and senescent cell antigen-like-containing domain protein 1					0.0638018	T	0.0964053	1.53782	FC	0.883273	H
2038	Q7Z4I7	LIMS2	LIM and senescent cell antigen-like-containing domain protein 2					0.0229495	T	0.0404052	2.81988	FC	1.11193	H
1824	Q14847	LASP1	LIM and SH3 domain protein 1					0.00013876	T	0.000856561	0.458574	FC	-2.15336	H
2579	Q9UHB6	LIMA1	LIM domain and actin-binding protein 1					0.00664554	T	0.0148014	0.594861	FC	-1.37148	H
2137	Q8WWI1	LMO7	LIM domain only protein 7					0.40753	T	0.469761	1.40279	FC	0.379273	H
209	O75112	LDB3	LIM domain-binding protein 3					0.206323	T	0.262533	1.60509	FC	0.586317	H
1973	Q5T7N2	L1TD1	LINE-1 type transposase domain-containing protein 1					0.784586	U	0.831316	1	H	0.08	R
670	P11182	DBT	Lipoamide acyltransferase component of branched-chain alpha-keto acid dehydrogenase complex, mitochondrial					0.0244761	T	0.0427495	0.434653	FC	-1.09802	H
2053	Q86X29	LSR	Lipolysis-stimulated lipoprotein receptor					0.00685195	U	0.0146648	0.0417753	H	-0.72	R
2185	Q93052	LPP	Lipoma-preferred partner					0.000802589	T	0.00276063	2.08641	FC	1.79796	H
815	P18428	LBP	Lipopolysaccharide-binding protein					0.791337	U	0.831529	1.16921	H	0.08	R
1277	P50851	LRBA	Lipopolysaccharide-responsive and beige-like anchor protein					0.0398945	T	0.0641851	0.452408	FC	-0.990589	H
1700	Q13136	PPFIA1	Liprin-alpha-1					0.0434643	U	0.0679327	0.239971	H	-0.51	R
497	P05451	REG1A	Lithostathine-1-alpha					0.0640221	U	0.0931807	0.443987	H	-0.5	R
891	P23141	CES1	Liver carboxylesterase 1					0.520523	U	0.578981	0.803503	H	-0.18	R
339	P00338	LDHA	L-lactate dehydrogenase A chain					0.00343002	T	0.0085827	0.640809	FC	-1.50597	H
528	P07195	LDHB	L-lactate dehydrogenase B chain					0.00315493	T	0.00806195	0.554414	FC	-1.52285	H
1101	P36776	LONP1	Lon protease homolog, mitochondrial					0.00058284	U	0.00242604	0.3385	H	-0.92	R
1052	P33121	ACSL1	Long-chain-fatty-acid--CoA ligase 1					0.856092	T	0.885908	1.05056	FC	0.0822746	H
313	O95573	ACSL3	Long-chain-fatty-acid--CoA ligase 3					0.000151974	U	0.00187244	0.000464953	H	-0.98	R
183	O60488	ACSL4	Long-chain-fatty-acid--CoA ligase 4					0.472676	U	0.534055	0.73119	H	-0.2	R
2621	Q9ULC5	ACSL5	Long-chain-fatty-acid--CoA ligase 5					0.00100798	U	0.00333564	0.122863	H	-0.88	R
913	P24666	ACP1	Low molecular weight phosphotyrosine protein phosphatase					0.000226121	T	0.00116276	0.417099	FC	-2.05367	H
1816	Q14696	MESD	LRP chaperone MESD					0.088973	U	0.124687	0.538063	H	-0.46	R
293	O95232	LUC7L3	Luc7-like protein 3					0.000172389	T	0.000972693	0.198685	FC	-2.10896	H
1305	P51884	LUM	Lumican					1.29306e-05	T	0.000269515	2.81734	FC	2.65333	H
499	P05455	SSB	Lupus La protein					0.000318005	T	0.00144421	0.291827	FC	-1.98449	H
2040	Q7Z4W1	DCXR	L-xylulose reductase					0.00112226	T	0.0035379	0.212792	FC	-1.73067	H
1696	Q13094	LCP2	Lymphocyte cytosolic protein 2					0.130564	T	0.177626	2.03845	FC	0.708467	H
1055	P33241	LSP1	Lymphocyte-specific protein 1					0.24638	T	0.305162	0.714813	FC	-0.535849	H
1190	P46736	BRCC3	Lys-63-specific deubiquitinase BRCC36	15	4	31	4	0.00520368	W	0.0132367	0.30183	FC	-1.53505	H
1838	Q15046	KARS1	Lysine--tRNA ligase					0.00109167	T	0.00346875	0.346202	FC	-1.73621	H
2029	Q7L5N7	LPCAT2	Lysophosphatidylcholine acyltransferase 2					0.00318961	T	0.00814311	0.186748	FC	-1.52065	H
444	P04062	GBA1	Lysosomal acid glucosylceramidase					0.431209	T	0.493795	0.71916	FC	-0.360099	H
1118	P38571	LIPA	Lysosomal acid lipase/cholesteryl ester hydrolase					0.255825	T	0.314489	0.740852	FC	-0.52488	H
663	P11117	ACP2	Lysosomal acid phosphatase					0.730294	U	0.779501	1.04558	H	0.1	R
645	P10253	GAA	Lysosomal alpha-glucosidase					0.170492	T	0.223037	0.693296	FC	-0.638497	H
66	O00754	MAN2B1	Lysosomal alpha-mannosidase					0.0072626	U	0.0149711	0.245745	H	-0.72	R
653	P10619	CTSA	Lysosomal protective protein					0.0072325	T	0.0156957	0.355742	FC	-1.35412	H
1165	P42785	PRCP	Lysosomal Pro-X carboxypeptidase					0.341521	T	0.402646	1.21659	FC	0.436925	H
1774	Q14108	SCARB2	Lysosome membrane protein 2					0.927287	T	0.950775	0.978052	FC	-0.0413877	H
677	P11279	LAMP1	Lysosome-associated membrane glycoprotein 1					0.0151732	T	0.0288094	0.198339	FC	-1.20011	H
711	P13473	LAMP2	Lysosome-associated membrane glycoprotein 2					0.0376353	U	0.0590205	0.4785	H	-0.56	R
1446	P61626	LYZ	Lysozyme C					0.749747	T	0.793198	1.11398	FC	0.144853	H
2214	Q96C86	DCPS	m7GpppX diphosphatase					2.63937e-05	T	0.000368469	0.29293	FC	-2.49979	H
890	P22897	MRC1	Macrophage mannose receptor 1					0.0250441	T	0.0436085	0.450794	FC	-1.09306	H
735	P14174	MIF	Macrophage migration inhibitory factor					0.000768539	U	0.00282438	0.466513	H	-0.9	R
1129	P40121	CAPG	Macrophage-capping protein					0.000219287	T	0.00114054	0.430822	FC	-2.05991	H
2392	Q9H0U3	MAGT1	Magnesium transporter protein 1					0.00677706	T	0.0149916	0.463599	FC	-1.36746	H
450	P04156	PRNP	Major prion protein	39	4	153	2	0.17484	W	0.229262	1.58005	FC	0.650835	H
1820	Q14764	MVP	Major vault protein					0.000182866	T	0.00101338	0.391986	FC	-2.09692	H
1138	P40925	MDH1	Malate dehydrogenase, cytoplasmic					0.867761	T	0.894338	0.983567	FC	-0.0755334	H
1139	P40926	MDH2	Malate dehydrogenase, mitochondrial					1.24203e-05	T	0.000264808	0.322467	FC	-2.66209	H
1785	Q14165	MLEC	Malectin					0.0342813	T	0.056622	0.633175	FC	-1.02434	H
2620	Q9ULC4	MCTS1	Malignant T-cell-amplified sequence 1	56	37	2567	37	0.0314968	W	0.0541269	0.514132	FC	-1.10244	H
2248	Q96IJ6	GMPPA	Mannose-1-phosphate guanyltransferase alpha					0.669645	T	0.72248	1.15479	FC	0.193965	H
2715	Q9Y5P6	GMPPB	Mannose-1-phosphate guanyltransferase beta					0.00908243	U	0.0179029	0.166412	H	-0.7	R
1064	P34949	MPI	Mannose-6-phosphate isomerase					0.234266	U	0.293938	1	H	-0.23	R
222	O75352	MPDU1	Mannose-P-dolichol utilization defect 1 protein					0.0098143	T	0.0200375	0.564641	FC	-1.29116	H
1760	Q13724	MOGS	Mannosyl-oligosaccharide glucosidase					0.00018373	T	0.00101615	0.428828	FC	-2.09595	H
2126	Q8WU39	MZB1	Marginal zone B- and B1-cell-specific protein					0.185877	U	0.237708	0.588878	H	-0.36	R
2204	Q96AM1	MRGPRF	Mas-related G-protein coupled receptor member F	21	3	232	3	0.00250758	W	0.00764593	9.3309	FC	1.81525	H
754	P15088	CPA3	Mast cell carboxypeptidase A					0.909722	U	0.935858	1.05156	H	0.04	R
1168	P43243	MATR3	Matrin-3					9.0375e-05	T	0.000678541	0.291916	FC	-2.24163	H
746	P14780	MMP9	Matrix metalloproteinase-9					0.791337	U	0.831529	0.735121	H	-0.08	R
2474	Q9NR99	MXRA5	Matrix-remodeling-associated protein 5					0.112118	T	0.155871	1.58823	FC	0.747068	H
678	P11310	ACADM	Medium-chain specific acyl-CoA dehydrogenase, mitochondrial					0.0885959	T	0.127485	0.74729	FC	-0.805117	H
1931	Q16853	AOC3	Membrane primary amine oxidase					0.00886311	T	0.0185013	1.98397	FC	1.31226	H
39	O00264	PGRMC1	Membrane-associated progesterone receptor component 1					0.000152379	T	0.000911338	0.393749	FC	-2.13418	H
107	O15173	PGRMC2	Membrane-associated progesterone receptor component 2					0.00220222	U	0.00582462	0.485641	H	-0.82	R
1367	P55145	MANF	Mesencephalic astrocyte-derived neurotrophic factor					0.754067	T	0.797165	0.904293	FC	-0.14226	H
371	P01033	TIMP1	Metalloproteinase inhibitor 1					0.122311	T	0.16787	1.73666	FC	0.725124	H
438	P02795	MT2A	Metallothionein-2					0.185295	T	0.239314	1.67388	FC	0.615964	H
1735	Q13505	MTX1	Metaxin-1					0.00100548	U	0.00333564	0.00077595	H	-0.84	R
230	O75431	MTX2	Metaxin-2					0.0125661	T	0.0245435	0.450625	FC	-1.2397	H
1711	Q13228	SELENBP1	Methanethiol oxidase					0.00561201	T	0.0128901	0.415694	FC	-1.40603	H
2523	Q9NZL9	MAT2B	Methionine adenosyltransferase 2 subunit beta					2.46214e-06	T	0.000163732	0.264726	FC	-3.02381	H
1334	P53582	METAP1	Methionine aminopeptidase 1	6	3	3	3	0.00775506	W	0.0178271	0.225626	FC	-1.45788	H
1275	P50579	METAP2	Methionine aminopeptidase 2					5.6633e-05	T	0.000530792	0.240592	FC	-2.33876	H
1384	P56192	MARS1	Methionine--tRNA ligase, cytoplasmic					0.00131495	U	0.00397472	0.122216	H	-0.86	R
785	P16455	MGMT	Methylated-DNA--protein-cysteine methyltransferase					0.316009	T	0.376702	0.706103	FC	-0.46126	H
1298	P51608	MECP2	Methyl-CpG-binding protein 2					0.332727	T	0.393441	1.26377	FC	0.445165	H
2447	Q9HCC0	MCCC2	Methylcrotonoyl-CoA carboxylase beta chain, mitochondrial					0.0024503	T	0.0066508	0.11823	FC	-1.57381	H
2268	Q96RQ3	MCCC1	Methylcrotonoyl-CoA carboxylase subunit alpha, mitochondrial					0.000149393	U	0.00187244	0.000564115	H	-1	R
1603	Q02252	ALDH6A1	Methylmalonate-semialdehyde dehydrogenase [acylating], mitochondrial					4.33115e-05	T	0.000443722	0.329407	FC	-2.39497	H
2311	Q9BQA1	WDR77	Methylosome protein 50					0.000590201	T	0.00220379	0.235292	FC	-1.85974	H
1343	P54105	CLNS1A	Methylosome subunit pICln					0.000784306	U	0.00287476	0.00055301	H	-0.87	R
2424	Q9H8H3	METTL7A	Methyltransferase-like protein 7A					0.0638909	T	0.0964094	0.681278	FC	-0.882947	H
2507	Q9NX63	CHCHD3	MICOS complex subunit MIC19					3.22911e-05	T	0.000388746	0.355494	FC	-2.45694	H
1933	Q16891	IMMT	MICOS complex subunit MIC60					0.07356	T	0.108763	0.737981	FC	-0.849752	H
1365	P55083	MFAP4	Microfibril-associated glycoprotein 4					0.795278	T	0.832072	0.899891	FC	-0.11777	H
654	P10620	MGST1	Microsomal glutathione S-transferase 1					0.000442358	T	0.00179319	0.339438	FC	-1.91782	H
85	O14880	MGST3	Microsomal glutathione S-transferase 3					0.00253759	T	0.00681489	0.586023	FC	-1.56676	H
2640	Q9UPN3	MACF1	Microtubule-actin cross-linking factor 1, isoforms 1/2/3/5					0.871151	U	0.90518	1	H	-0.04	R
1548	P78559	MAP1A	Microtubule-associated protein 1A					0.00162821	T	0.00481227	2.14489	FC	1.65597	H
1198	P46821	MAP1B	Microtubule-associated protein 1B					0.000641887	T	0.00235584	2.77151	FC	1.84286	H
959	P27816	MAP4	Microtubule-associated protein 4					0.00434059	T	0.0104331	0.747097	FC	-1.45829	H
1884	Q15691	MAPRE1	Microtubule-associated protein RP/EB family member 1					0.000340601	T	0.00151	0.403924	FC	-1.97061	H
1877	Q15555	MAPRE2	Microtubule-associated protein RP/EB family member 2					0.0430612	T	0.0687257	0.570034	FC	-0.973436	H
850	P20774	OGN	Mimecan					0.0751783	T	0.110681	1.68292	FC	0.84458	H
2120	Q8TCT9	HM13	Minor histocompatibility antigen H13					0.0011223	T	0.0035379	0.306189	FC	-1.73066	H
1942	Q3SY69	ALDH1L2	Mitochondrial 10-formyltetrahydrofolate dehydrogenase					0.57017	U	0.627107	0.640928	H	-0.16	R
1614	Q02978	SLC25A11	Mitochondrial 2-oxoglutarate/malate carrier protein					0.00358166	T	0.00889997	0.665816	FC	-1.49722	H
2036	Q7Z434	MAVS	Mitochondrial antiviral-signaling protein					0.701606	T	0.749077	0.924239	FC	-0.17411	H
159	O43772	SLC25A20	Mitochondrial carnitine/acylcarnitine carrier protein					0.0174463	T	0.0324086	0.381499	FC	-1.17057	H
2731	Q9Y6C9	MTCH2	Mitochondrial carrier homolog 2					0.00478903	T	0.0113066	0.429475	FC	-1.43832	H
2562	Q9UBX3	SLC25A10	Mitochondrial dicarboxylate carrier					0.000298443	T	0.00138925	0.0796812	FC	-1.99735	H
2686	Q9Y3D6	FIS1	Mitochondrial fission 1 protein					0.000876981	T	0.00295109	0.551278	FC	-1.78016	H
2427	Q9H936	SLC25A22	Mitochondrial glutamate carrier 1					0.0762896	T	0.112205	0.504531	FC	-0.841085	H
2713	Q9Y5L4	TIMM13	Mitochondrial import inner membrane translocase subunit Tim13					0.000263821	T	0.00128593	0.17274	FC	-2.02235	H
146	O43615	TIMM44	Mitochondrial import inner membrane translocase subunit TIM44					0.000422844	T	0.00173422	0.226595	FC	-1.92692	H
1943	Q3ZCQ8	TIMM50	Mitochondrial import inner membrane translocase subunit TIM50					0.000493894	T	0.00193743	0.180745	FC	-1.89561	H
2709	Q9Y5J7	TIMM9	Mitochondrial import inner membrane translocase subunit Tim9					0.00328964	T	0.00832173	0.194713	FC	-1.51441	H
2478	Q9NS69	TOMM22	Mitochondrial import receptor subunit TOM22 homolog	40	9	191	9	0.000684097	W	0.00328861	0.115452	FC	-2.20564	H
1889	Q15785	TOMM34	Mitochondrial import receptor subunit TOM34					0.00546201	T	0.0126182	0.223289	FC	-1.41155	H
334	O96008	TOMM40	Mitochondrial import receptor subunit TOM40 homolog					0.00282727	U	0.00705051	0.113156	H	-0.8	R
275	O94826	TOMM70	Mitochondrial import receptor subunit TOM70	33	5	30	5	5.81895e-05	W	0.00116111	0.281953	FC	-3.03849	H		enzymy zwiazane z glikolizą, wszystkie up w PR
291	O95202	LETM1	Mitochondrial proton/calcium exchanger protein					1.84711e-05	T	0.00029469	0.142405	FC	-2.5762	H
311	O95563	MPC2	Mitochondrial pyruvate carrier 2					1.98741e-05	T	0.000306676	0.301675	FC	-2.56046	H
1675	Q10713	PMPCA	Mitochondrial-processing peptidase subunit alpha					0.000177928	T	0.000993907	0.167979	FC	-2.1025	H
232	O75439	PMPCB	Mitochondrial-processing peptidase subunit beta					0.000217988	T	0.0011374	0.123275	FC	-2.06112	H
971	P28482	MAPK1	Mitogen-activated protein kinase 1					6.11215e-05	T	0.000540983	0.644226	FC	-2.32284	H
1907	Q16539	MAPK14	Mitogen-activated protein kinase 14					0.0451546	U	0.0682819	0.535295	H	-0.54	R
950	P27361	MAPK3	Mitogen-activated protein kinase 3					0.0280491	T	0.0475659	0.403628	FC	-1.06842	H
151	O43684	BUB3	Mitotic checkpoint protein BUB3					0.000213238	T	0.00112161	0.253098	FC	-2.0656	H
2063	Q8IVT2	MISP	Mitotic interactor and substrate of PLK1					0.100702	T	0.142286	0.614751	FC	-0.773771	H
2030	Q7L9L4	MOB1B	MOB kinase activator 1B					0.00468852	T	0.0110881	0.563872	FC	-1.44263	H
931	P26038	MSN	Moesin					0.0227554	T	0.040149	1.24207	FC	1.11376	H
2079	Q8N2K0	ABHD12	Monoacylglycerol lipase ABHD12					0.00132858	U	0.00401158	0.00196756	H	-0.82	R
579	P08571	CD14	Monocyte differentiation antigen CD14					0.612733	T	0.668763	1.10479	FC	0.230371	H
2007	Q6UB35	MTHFD1L	Monofunctional C1-tetrahydrofolate synthase, mitochondrial					0.00486867	U	0.0110915	0.00101696	H	-0.67	R
1545	P78406	RAE1	mRNA export factor					0.0238182	T	0.0416558	0.391593	FC	-1.10391	H
2607	Q9UKD2	MRTO4	mRNA turnover protein 4 homolog					0.182346	T	0.236002	0.70674	FC	-0.620335	H
2421	Q9H7C9	AAMDC	Mth938 domain-containing protein					1	U	1	0.990818	H	0	R
2406	Q9H3R2	MUC13	Mucin-13					6.51818e-05	T	0.000556736	0.0230683	FC	-2.30944	H
1609	Q02817	MUC2	Mucin-2					0.147443	T	0.197321	0.561442	FC	-0.676983	H
2594	Q9UI30	TRMT112	Multifunctional methyltransferase subunit TRM112-like protein					0.00285675	T	0.00751309	0.342377	FC	-1.54289	H
189	O60568	PLOD3	Multifunctional procollagen lysine hydroxylase and glycosyltransferase LH3					0.00359789	U	0.0085969	0.222273	H	-0.78	R
878	P22234	PAICS	Multifunctional protein ADE2					0.000182672	U	0.00187244	0.285229	H	-1	R
2108	Q8NI22	MCFD2	Multiple coagulation factor deficiency protein 2					0.161145	T	0.212602	0.441628	FC	-0.653555	H
2473	Q9NR56	MBNL1	Muscleblind-like protein 1					0.00323063	T	0.00821781	0.503487	FC	-1.51807	H
2314	Q9BQG0	MYBBP1A	Myb-binding protein 1A					0.00717764	T	0.0156252	0.371805	FC	-1.35568	H
54	O00499	BIN1	Myc box-dependent-interacting protein 1					0.293007	T	0.352897	0.748567	FC	-0.484432	H
2489	Q9NUJ1	ABHD10	Mycophenolic acid acyl-glucuronide esterase, mitochondrial					0.0803556	T	0.117566	0.481892	FC	-0.82867	H
909	P24158	PRTN3	Myeloblastin					0.57075	U	0.627107	0.753909	H	-0.16	R
1142	P41218	MNDA	Myeloid cell nuclear differentiation antigen					0.384673	U	0.445436	0.65786	H	-0.24	R
2270	Q96S97	MYADM	Myeloid-associated differentiation marker					0.55951	T	0.617537	0.792675	FC	-0.265914	H
2191	Q969H8	MYDGF	Myeloid-derived growth factor					0.110849	T	0.154184	0.65654	FC	-0.749918	H
489	P05164	MPO	Myeloperoxidase					0.909722	U	0.935858	0.955993	H	-0.04	R
2524	Q9NZM1	MYOF	Myoferlin					0.775229	T	0.815523	0.944194	FC	-0.129634	H
398	P02144	MB	Myoglobin					0.0625413	U	0.0926673	0.00211695	H	-0.48	R
1887	Q15746	MYLK	Myosin light chain kinase, smooth muscle					0.00466326	T	0.0110471	2.87667	FC	1.44373	H
1405	P60660	MYL6	Myosin light polypeptide 6					0.00448685	T	0.0107018	2.0917	FC	1.45156	H
91	O14950	MYL12B	Myosin regulatory light chain 12B					0.0049819	T	0.011683	0.712986	FC	-1.43029	H
916	P24844	MYL9	Myosin regulatory light polypeptide 9					0.0101748	T	0.0206229	2.21109	FC	1.28368	H
1081	P35580	MYH10	Myosin-10					0.260889	T	0.32001	0.743931	FC	-0.519124	H
1087	P35749	MYH11	Myosin-11					0.0183421	T	0.0336372	3.05258	FC	1.15992	H
2035	Q7Z406	MYH14	Myosin-14					0.000534227	T	0.00204117	0.325964	FC	-1.8798	H
1080	P35579	MYH9	Myosin-9					0.00609301	T	0.0137796	0.601732	FC	-1.38924	H
1396	P58546	MTPN	Myotrophin					0.475859	T	0.539397	0.875654	FC	-0.325661	H
988	P29966	MARCKS	Myristoylated alanine-rich C-kinase substrate					0.699226	T	0.747107	1.05432	FC	0.175576	H
853	P20933	AGA	N(4)-(beta-N-acetylglucosaminyl)-L-asparaginase					0.0201729	U	0.035369	0.0414394	H	-0.62	R
272	O94760	DDAH1	N(G),N(G)-dimethylarginine dimethylaminohydrolase 1	18	7	86	7	4.81956e-05	W	0.00113135	0.29706	FC	-2.94235	H
328	O95865	DDAH2	N(G),N(G)-dimethylarginine dimethylaminohydrolase 2					0.330961	T	0.392016	0.827555	FC	-0.446838	H
78	O14745	SLC9A3R1	Na(+)/H(+) exchange regulatory cofactor NHE-RF1					0.00446571	T	0.0106767	0.559678	FC	-1.45252	H
2599	Q9UJ70	NAGK	N-acetyl-D-glucosamine kinase					0.741034	T	0.785468	0.957236	FC	-0.150096	H
2045	Q86SF2	GALNT7	N-acetylgalactosaminyltransferase 7					0.00032348	X	0.0564675	only in B		0
765	P15586	GNS	N-acetylglucosamine-6-sulfatase					0.197523	U	0.25214	0.308702	H	-0.34	R
2259	Q96PD5	PGLYRP2	N-acetylmuramoyl-L-alanine amidase					0.30653	T	0.367757	1.28606	FC	0.470657	H
1297	P51606	RENBP	N-acylglucosamine 2-epimerase					0.520523	U	0.578981	1.25811	H	0.18	R
2107	Q8NFW8	CMAS	N-acylneuraminate cytidylyltransferase					1.74466e-05	T	0.00029469	0.201823	FC	-2.58848	H
1726	Q13423	NNT	NAD(P) transhydrogenase, mitochondrial					0.12148	T	0.166893	0.578389	FC	-0.726855	H
764	P15559	NQO1	NAD(P)H dehydrogenase [quinone] 1	46	22	335	22	0.00655446	W	0.0157004	0.222861	FC	-1.5153	H
2101	Q8NCW5	NAXE	NAD(P)H-hydrate epimerase					0.0453785	T	0.071768	2.37598	FC	0.961601	H
898	P23368	ME2	NAD-dependent malic enzyme, mitochondrial					0.000312149	T	0.00142909	0.38092	FC	-1.98826	H
2075	Q8N183	NDUFAF2	NADH dehydrogenase [ubiquinone] 1 alpha subcomplex assembly factor 2					0.0123256	T	0.0241751	0.145373	FC	-1.24374	H
296	O95299	NDUFA10	NADH dehydrogenase [ubiquinone] 1 alpha subcomplex subunit 10, mitochondrial					0.000109049	T	0.00075018	0.412448	FC	-2.20287	H
2057	Q86Y39	NDUFA11	NADH dehydrogenase [ubiquinone] 1 alpha subcomplex subunit 11	45	5	89	3	0.00838227	W	0.0190339	0.205525	FC	-1.43973	H
2592	Q9UI09	NDUFA12	NADH dehydrogenase [ubiquinone] 1 alpha subcomplex subunit 12					0.00254908	T	0.0068326	0.239423	FC	-1.56585	H
2531	Q9P0J0	NDUFA13	NADH dehydrogenase [ubiquinone] 1 alpha subcomplex subunit 13					0.0131808	T	0.0254416	0.320325	FC	-1.2297	H
1921	Q16718	NDUFA5	NADH dehydrogenase [ubiquinone] 1 alpha subcomplex subunit 5					0.000346895	T	0.00153061	0.332531	FC	-1.9669	H
1308	P51970	NDUFA8	NADH dehydrogenase [ubiquinone] 1 alpha subcomplex subunit 8					3.35992e-05	T	0.000395493	0.343088	FC	-2.44853	H
1926	Q16795	NDUFA9	NADH dehydrogenase [ubiquinone] 1 alpha subcomplex subunit 9, mitochondrial					0.580397	T	0.637205	0.833096	FC	-0.25177	H
332	O96000	NDUFB10	NADH dehydrogenase [ubiquinone] 1 beta subcomplex subunit 10					5.10093e-06	T	0.000189158	0.258493	FC	-2.85858	H
288	O95168	NDUFB4	NADH dehydrogenase [ubiquinone] 1 beta subcomplex subunit 4					9.14039e-06	T	0.000234217	0.362962	FC	-2.72916	H
289	O95169	NDUFB8	NADH dehydrogenase [ubiquinone] 1 beta subcomplex subunit 8, mitochondrial					5.88208e-05	T	0.000540983	0.187869	FC	-2.33084	H
1255	P49821	NDUFV1	NADH dehydrogenase [ubiquinone] flavoprotein 1, mitochondrial					0.00213586	T	0.0059834	0.46316	FC	-1.60144	H
825	P19404	NDUFV2	NADH dehydrogenase [ubiquinone] flavoprotein 2, mitochondrial					0.00579536	U	0.0125088	0.582862	H	-0.74	R
216	O75306	NDUFS2	NADH dehydrogenase [ubiquinone] iron-sulfur protein 2, mitochondrial					0.064989	T	0.0976409	0.551933	FC	-0.87896	H
235	O75489	NDUFS3	NADH dehydrogenase [ubiquinone] iron-sulfur protein 3, mitochondrial					0.000227163	T	0.00116276	0.500319	FC	-2.05273	H
171	O43920	NDUFS5	NADH dehydrogenase [ubiquinone] iron-sulfur protein 5					0.00239092	T	0.00653907	0.438735	FC	-1.57875	H
35	O00217	NDUFS8	NADH dehydrogenase [ubiquinone] iron-sulfur protein 8, mitochondrial					0.00828758	T	0.0175757	0.413941	FC	-1.32611	H
2587	Q9UHQ9	CYB5R1	NADH-cytochrome b5 reductase 1					0.0126651	T	0.024685	0.508736	FC	-1.23806	H
342	P00387	CYB5R3	NADH-cytochrome b5 reductase 3					0.712547	T	0.759018	1.03272	FC	0.167396	H
970	P28331	NDUFS1	NADH-ubiquinone oxidoreductase 75 kDa subunit, mitochondrial					0.003667	T	0.00907973	0.556426	FC	-1.49245	H
439	P03905	ND4	NADH-ubiquinone oxidoreductase chain 4					0.00491056	X	0.249367	only in B		0
1214	P48163	ME1	NADP-dependent malic enzyme					0.0678979	T	0.101683	0.448534	FC	-0.868681	H
2716	Q9Y5S8	NOX1	NADPH oxidase 1					0.00491056	X	0.249367	only in B		0
885	P22570	FDXR	NADPH:adrenodoxin oxidoreductase, mitochondrial					0.4852	T	0.547984	0.843823	FC	-0.318706	H
782	P16435	POR	NADPH--cytochrome P450 reductase					0.000665256	T	0.00239715	0.185261	FC	-1.83567	H
1145	P41227	NAA10	N-alpha-acetyltransferase 10					0.000168702	T	0.000956679	0.154571	FC	-2.11338	H
2355	Q9BXJ9	NAA15	N-alpha-acetyltransferase 15, NatA auxiliary subunit					0.0091085	U	0.0179029	0.291022	H	-0.7	R
167	O43847	NRDC	Nardilysin					0.103799	T	0.145809	0.504129	FC	-0.766278	H
21	E9PAV3	NACA	Nascent polypeptide-associated complex subunit alpha, muscle-specific form					1.21487e-05	T	0.000261009	0.290616	FC	-2.66691	H
2657	Q9Y2A7	NCKAP1	Nck-associated protein 1					0.259541	T	0.318776	0.771682	FC	-0.520648	H
1368	P55160	NCKAP1L	Nck-associated protein 1-like					0.26837	T	0.327174	0.594956	FC	-0.510772	H
1893	Q15843	NEDD8	NEDD8					0.545508	T	0.605325	1.11977	FC	0.275552	H
2115	Q8TBC4	UBA3	NEDD8-activating enzyme E1 catalytic subunit					0.00163783	T	0.00481849	0.304789	FC	-1.65479	H
1743	Q13564	NAE1	NEDD8-activating enzyme E1 regulatory subunit					0.273036	U	0.331417	0.789263	H	-0.3	R
1421	P61081	UBE2M	NEDD8-conjugating enzyme Ubc12					0.00826444	T	0.0175582	0.590221	FC	-1.32669	H
2142	Q8WX92	NELFB	Negative elongation factor B					0.0740345	T	0.109291	0.531084	FC	-0.848225	H
575	P08473	MME	Neprilysin					0.87167	U	0.905383	1	H	0.05	R
1223	P48681	NES	Nestin					0.211662	T	0.268227	0.77728	FC	-0.579173	H
714	P13591	NCAM1	Neural cell adhesion molecule 1					0.472676	U	0.534055	0.604587	H	-0.2	R
1668	Q09666	AHNAK	Neuroblast differentiation-associated protein AHNAK					0.101659	T	0.143328	1.17328	FC	0.771436	H
1443	P61601	NCALD	Neurocalcin-delta					0.45151	U	0.51683	0.925565	H	-0.2	R
2369	Q9BYT8	NLN	Neurolysin, mitochondrial					0.0584521	U	0.0867925	0.00165963	H	-0.5	R
2034	Q7Z3B1	NEGR1	Neuronal growth regulator 1					0.0040687	U	0.00966317	799.624	H	0.76	R
2724	Q9Y639	NPTN	Neuroplastin					0.0865588	T	0.124875	1.52099	FC	0.810755	H
1817	Q14697	GANAB	Neutral alpha-glucosidase AB					0.104069	T	0.146062	0.735614	FC	-0.765636	H
1888	Q15758	SLC1A5	Neutral amino acid transporter B(0)					0.00282727	U	0.00705051	0.269622	H	-0.8	R
2004	Q6PIU2	NCEH1	Neutral cholesterol ester hydrolase 1					2.55557e-05	T	0.000358679	0.225262	FC	-2.50666	H
889	P22894	MMP8	Neutrophil collagenase					0.762282	U	0.808297	0.483115	H	-0.09	R
835	P19878	NCF2	Neutrophil cytosol factor 2					0.00282727	U	0.00705051	2.20476	H	0.8	R
1845	Q15080	NCF4	Neutrophil cytosol factor 4					0.237762	U	0.298056	0.382056	H	-0.32	R
1397	P59665	DEFA1B	Neutrophil defensin 1					1	U	1	1.02031	H	0	R
1398	P59666	DEFA3	Neutrophil defensin 3					1	U	1	1	H	0	R
569	P08246	ELANE	Neutrophil elastase					0.00207897	T	0.00587115	2.3093	FC	1.60687	H
1550	P80188	LCN2	Neutrophil gelatinase-associated lipocalin					0.140465	U	0.186908	0.424126	H	-0.4	R
1670	Q0ZGT2	NEXN	Nexilin					0.753182	T	0.796531	0.91478	FC	-0.142791	H
2090	Q8NBF2	NHLRC2	NHL repeat-containing protein 2					0.307308	U	0.367173	1.86228	H	0.28	R
1378	P55769	SNU13	NHP2-like protein 1					0.00275274	T	0.00728477	0.218576	FC	-1.55036	H
2276	Q96TA1	NIBAN2	Niban-like protein 1					5.5127e-06	T	0.000189158	0.297219	FC	-2.84121	H
2193	Q969V3	NCLN	Nicalin					0.0126428	T	0.0246588	0.616212	FC	-1.23843	H
2152	Q92542	NCSTN	Nicastrin					0.0325868	T	0.0541756	0.466423	FC	-1.03553	H
1133	P40261	NNMT	Nicotinamide N-methyltransferase					0.809912	T	0.846272	0.925129	FC	-0.109166	H
1174	P43490	NAMPT	Nicotinamide phosphoribosyltransferase					0.73373	U	0.779501	0.88951	H	-0.1	R
2014	Q6XQN6	NAPRT	Nicotinate phosphoribosyltransferase					0.000651342	T	0.00236875	0.291286	FC	-1.83992	H
1858	Q15274	QPRT	Nicotinate-nucleotide pyrophosphorylase [carboxylating]					0.0113297	U	0.0214389	0.391812	H	-0.68	R
739	P14543	NID1	Nidogen-1					0.00508864	T	0.0118659	1.95044	FC	1.42598	H
1775	Q14112	NID2	Nidogen-2					0.000121324	T	0.000799191	4.47807	FC	2.18093	H
1962	Q5JPE7	NOMO2	Nodal modulator 2					0.0440109	T	0.0700014	2.60397	FC	0.968517	H
482	P05114	HMGN1	Non-histone chromosomal protein HMG-14					0.145627	T	0.195358	0.661899	FC	-0.680222	H
1856	Q15233	NONO	Non-POU domain-containing octamer-binding protein					0.000512981	T	0.00198168	0.365917	FC	-1.88797	H
643	P10153	RNASE2	Non-secretory ribonuclease					0.960659	T	0.978171	0.984123	FC	-0.0223684	H
879	P22307	SCP2	Non-specific lipid-transfer protein					1.05468e-06	T	0.000128075	0.219457	FC	-3.22164	H
2377	Q9C002	C15orf48	Normal mucosa of esophagus-specific gene 1 protein					0.00255878	T	0.00685205	0.184759	FC	-1.56509	H
1450	P61916	NPC2	NPC intracellular cholesterol transporter 2					0.387016	T	0.44964	0.852467	FC	-0.396475	H
2639	Q9UNZ2	NSFL1C	NSFL1 cofactor p47					0.000247714	T	0.00124185	0.427109	FC	-2.03514	H
901	P23497	SP100	Nuclear autoantigen Sp-100					0.669904	T	0.72248	0.853267	FC	-0.193803	H
1232	P49321	NASP	Nuclear autoantigenic sperm protein					0.00100798	U	0.00333564	0.129298	H	-0.88	R
1667	Q09161	NCBP1	Nuclear cap-binding protein subunit 1					9.32421e-05	T	0.000687138	0.143956	FC	-2.23518	H
834	P19838	NFKB1	Nuclear factor NF-kappa-B p105 subunit					0.000273846	U	0.00187244	0.00136561	H	-0.96	R
1691	Q12972	PPP1R8	Nuclear inhibitor of protein phosphatase 1					0.0203918	T	0.0366265	0.290223	FC	-1.13731	H
2652	Q9Y266	NUDC	Nuclear migration protein nudC					0.00246595	T	0.00667213	0.519825	FC	-1.57253	H
1828	Q14980	NUMA1	Nuclear mitotic apparatus protein 1					0.00172407	T	0.00504127	0.427804	FC	-1.64449	H
1393	P57740	NUP107	Nuclear pore complex protein Nup107					0.42337	T	0.486214	0.774122	FC	-0.36637	H
2128	Q8WUM0	NUP133	Nuclear pore complex protein Nup133					0.000420701	U	0.00215423	0.00238323	H	-0.9	R
246	O75694	NUP155	Nuclear pore complex protein Nup155					0.0628182	T	0.0951987	0.539479	FC	-0.886902	H
1677	Q12769	NUP160	Nuclear pore complex protein Nup160					0.00129295	U	0.00397472	0.0679804	H	-0.86	R
2161	Q92621	NUP205	Nuclear pore complex protein Nup205					0.000235327	T	0.00119287	0.107213	FC	-2.04556	H
2346	Q9BW27	NUP85	Nuclear pore complex protein Nup85					0.0133068	U	0.0250275	0.139174	H	-0.66	R
2076	Q8N1F7	NUP93	Nuclear pore complex protein Nup93					0.00262319	T	0.00699767	0.39301	FC	-1.56008	H
1327	P52948	NUP98	Nuclear pore complex protein Nup98-Nup96					0.062026	U	0.0919525	0.262333	H	-0.5	R
1111	P37198	NUP62	Nuclear pore glycoprotein p62	50	37	972	37	0.000384606	W	0.00238073	0.149074	FC	-2.28625	H
2124	Q8TEM1	NUP210	Nuclear pore membrane glycoprotein 210					0.000328789	U	0.00187244	0.00094498	H	-0.94	R
2113	Q8TAT6	NPLOC4	Nuclear protein localization protein 4 homolog					0.000764504	T	0.00266785	0.259053	FC	-1.80773	H
1453	P61970	NUTF2	Nuclear transport factor 2					0.00335636	T	0.00844532	0.443551	FC	-1.51035	H
1526	P67809	YBX1	Nuclease-sensitive element-binding protein 1					0.000152008	T	0.000911069	0.261016	FC	-2.13468	H
1610	Q02818	NUCB1	Nucleobindin-1					0.613804	T	0.66967	1.10208	FC	0.229672	H
1551	P80303	NUCB2	Nucleobindin-2					0.0949579	T	0.134971	0.68151	FC	-0.78821	H
1827	Q14978	NOLC1	Nucleolar and coiled-body phosphoprotein 1					0.00819095	T	0.0174636	0.419566	FC	-1.32853	H
2693	Q9Y3T9	NOC2L	Nucleolar complex protein 2 homolog					0.000151974	U	0.00187244	0.000836329	H	-0.98	R
2371	Q9BZE4	GTPBP	Nucleolar GTP-binding protein 1					0.00032348	X	0.0564675	only in B		0
59	O00567	NOP56	Nucleolar protein 56	26	3	156	1	0.000843816	W	0.0037345	0.217686	FC	-2.09254	H
2671	Q9Y2X3	NOP58	Nucleolar protein 58					0.000555262	T	0.00209574	0.387994	FC	-1.87202	H
2469	Q9NR30	DDX21	Nucleolar RNA helicase 2					0.000356993	T	0.00155971	0.178427	FC	-1.9611	H
797	P17480	UBTF	Nucleolar transcription factor 1					0.0374472	T	0.06095	0.58901	FC	-1.00473	H
823	P19338	NCL	Nucleolin					5.55209e-05	T	0.000523762	0.199227	FC	-2.3429	H
1589	Q01085	TIAL1	Nucleolysin TIAR					0.00125459	T	0.00388478	0.271102	FC	-1.7083	H
520	P06748	NPM1	Nucleophosmin					3.97376e-05	T	0.000425238	0.27846	FC	-2.4131	H
2229	Q96EE3	SEH1L	Nucleoporin SEH1					0.905371	U	0.935858	1	H	0.04	R
698	P12270	TPR	Nucleoprotein TPR					2.27985e-06	T	0.000163228	0.204142	FC	-3.04151	H
1712	Q13232	NME3	Nucleoside diphosphate kinase 3					0.000543389	T	0.00206769	0.279141	FC	-1.87637	H
763	P15531	NME1	Nucleoside diphosphate kinase A					0.00131447	T	0.00404988	0.320243	FC	-1.69894	H
882	P22392	NME2	Nucleoside diphosphate kinase B					0.000201958	T	0.00108475	0.412456	FC	-2.07667	H
1370	P55209	NAP1L1	Nucleosome assembly protein 1-like 1					0.0013222	T	0.00405813	0.233429	FC	-1.69776	H
2297	Q99733	NAP1L4	Nucleosome assembly protein 1-like 4					2.52827e-05	T	0.000357783	0.310123	FC	-2.50895	H
2269	Q96RS6	NUDCD1	NudC domain-containing protein 1					0.000151974	U	0.00187244	0.000406825	H	-0.98	R
2485	Q9NTK5	OLA1	Obg-like ATPase 1					0.00197618	T	0.00565521	0.456514	FC	-1.61707	H
2504	Q9NX40	OCIAD1	OCIA domain-containing protein 1					6.22206e-05	T	0.000546485	0.29407	FC	-2.31912	H
1957	Q56VL3	OCIAD2	OCIA domain-containing protein 2	44	4	159	2	0.00339023	W	0.00962886	0.136503	FC	-1.75048	H
2012	Q6UX06	OLFM4	Olfactomedin-4					0.0344834	T	0.0568213	0.0964752	FC	-1.02304	H
2011	Q6UWY5	OLFML1	Olfactomedin-like protein 1					0.569936	T	0.627385	1.15842	FC	0.258821	H
2475	Q9NRN5	OLFML3	Olfactomedin-like protein 3					0.0237084	U	0.040205	704.207	H	0.52	R
2684	Q9Y3B8	REXO2	Oligoribonuclease, mitochondrial					0.786882	T	0.824985	1.08137	FC	0.122727	H
2462	Q9NQR4	NIT2	Omega-amidase NIT2	59	17	698	17	7.5723e-05	W	0.00127261	0.31099	FC	-2.95961	H
2527	Q9NZT2	OGFR	Opioid growth factor receptor					0.00247812	U	0.00651731	0.00101689	H	-0.8	R
2220	Q96CV9	OPTN	Optineurin					0.0210855	U	0.0359264	0.669635	H	-0.62	R
452	P04181	OAT	Ornithine aminotransferase, mitochondrial					0.00320106	T	0.00815744	0.374897	FC	-1.51992	H
2173	Q92882	OSTF1	Osteoclast-stimulating factor 1					8.40776e-05	T	0.000643366	0.371212	FC	-2.25658	H
1099	P36551	CPOX	Oxygen-dependent coproporphyrinogen-III oxidase, mitochondrial					0.000296925	U	0.00187244	0.0188651	H	-0.96	R
872	P22059	OSBP	Oxysterol-binding protein 1					0.0369614	T	0.0603028	4.94015	FC	1.00763	H
2372	Q9BZF1	OSBPL8	Oxysterol-binding protein-related protein 8					0.010775	T	0.0216042	0.396123	FC	-1.27178	H
2273	Q96ST3	SIN3A	Paired amphipathic helix protein Sin3a					0.000927898	U	0.00333564	0.00143502	H	-0.83	R
2143	Q8WX93	PALLD	Palladin					0.000308484	T	0.0014171	2.74207	FC	1.99065	H
1279	P50897	PPT1	Palmitoyl-protein thioesterase 1					3.40333e-06	T	0.000170732	0.183787	FC	-2.94986	H
467	P04746	AMY2A	Pancreatic alpha-amylase					0.0204705	T	0.0367443	3.74341	FC	1.13648	H
2144	Q8WXF1	PSPC1	Paraspeckle component 1					1.30395e-07	T	4.55243e-05	0.139119	FC	-3.73832	H
854	P20962	PTMS	Parathymosin					0.0617901	T	0.0939465	0.776346	FC	-0.890749	H
2321	Q9BRP8	PYM1	Partner of Y14 and mago					0.056651	T	0.0867944	0.709519	FC	-0.91089	H
1228	P49023	PXN	Paxillin					0.00250491	T	0.00674057	0.439343	FC	-1.56937	H
233	O75475	PSIP1	PC4 and SFRS1-interacting protein					4.0315e-06	T	0.000173179	0.183313	FC	-2.9115	H
25	O00151	PDLIM1	PDZ and LIM domain protein 1					3.94606e-05	T	0.000423898	0.375178	FC	-2.41457	H
1950	Q53GG5	PDLIM3	PDZ and LIM domain protein 3					0.00482954	T	0.0113734	2.23338	FC	1.43661	H
1271	P50479	PDLIM4	PDZ and LIM domain protein 4					0.00047315	T	0.00187714	2.63756	FC	1.90425	H
2242	Q96HC4	PDLIM5	PDZ and LIM domain protein 5					0.18603	T	0.239991	0.781647	FC	-0.614884	H
2465	Q9NR12	PDLIM7	PDZ and LIM domain protein 7					0.00184825	T	0.00534387	2.96465	FC	1.63051	H
86	O14908	GIPC1	PDZ domain-containing protein GIPC1					9.45002e-06	T	0.000234217	0.180881	FC	-2.72185	H
2561	Q9UBV8	PEF1	Peflin					0.0257481	U	0.0426792	0.535143	H	-0.6	R
2234	Q96EY7	PTCD3	Pentatricopeptide repeat domain-containing protein 3, mitochondrial					0.000273846	U	0.00187244	0.0012525	H	-0.96	R
242	O75594	PGLYRP1	Peptidoglycan recognition protein 1					0.518947	U	0.578981	0.275065	H	-0.18	R
1505	P62937	PPIA	Peptidyl-prolyl cis-trans isomerase A					4.29132e-06	T	0.000175647	0.413526	FC	-2.89741	H
897	P23284	PPIB	Peptidyl-prolyl cis-trans isomerase B					0.623117	T	0.679035	0.918724	FC	-0.223617	H
1662	Q08752	PPID	Peptidyl-prolyl cis-trans isomerase D					0.000323056	U	0.00187244	0.096136	H	-0.96	R
1005	P30405	PPIF	Peptidyl-prolyl cis-trans isomerase F, mitochondrial					1.36336e-05	T	0.000275932	0.178452	FC	-2.64183	H
2206	Q96AY3	FKBP10	Peptidyl-prolyl cis-trans isomerase FKBP10					0.381195	T	0.444171	1.3586	FC	0.401464	H
2513	Q9NYL4	FKBP11	Peptidyl-prolyl cis-trans isomerase FKBP11					0.935831	T	0.958129	0.970711	FC	-0.0365122	H
1506	P62942	FKBP1A	Peptidyl-prolyl cis-trans isomerase FKBP1A					0.00597401	T	0.0135654	0.619864	FC	-1.39327	H
943	P26885	FKBP2	Peptidyl-prolyl cis-trans isomerase FKBP2					0.841098	T	0.873436	0.961327	FC	-0.0909666	H
1583	Q00688	FKBP3	Peptidyl-prolyl cis-trans isomerase FKBP3					8.64448e-06	T	0.000234217	0.324752	FC	-2.74144	H
1607	Q02790	FKBP4	Peptidyl-prolyl cis-trans isomerase FKBP4					6.12068e-05	T	0.000540983	0.238058	FC	-2.32255	H
1731	Q13451	FKBP5	Peptidyl-prolyl cis-trans isomerase FKBP5					0.00907352	T	0.0188466	0.382788	FC	-1.30741	H
2726	Q9Y680	FKBP7	Peptidyl-prolyl cis-trans isomerase FKBP7					0.96985	U	0.986091	1.03745	H	0.02	R
297	O95302	FKBP9	Peptidyl-prolyl cis-trans isomerase FKBP9					0.113365	T	0.157213	0.695708	FC	-0.744295	H
137	O43447	PPIH	Peptidyl-prolyl cis-trans isomerase H					6.71609e-08	T	4.06714e-05	0.245607	FC	-3.91191	H
2648	Q9Y237	PIN4	Peptidyl-prolyl cis-trans isomerase NIMA-interacting 4					0.00011254	T	0.000762942	0.160002	FC	-2.19639	H
176	O60240	PLIN1	Perilipin-1					0.0235199	U	0.0399095	0.00169839	H	-0.59	R
2288	Q99541	PLIN2	Perilipin-2					0.169731	U	0.221419	2.92714	H	0.35	R
191	O60664	PLIN3	Perilipin-3					0.392188	T	0.454892	0.860531	FC	-0.392083	H
2263	Q96Q06	PLIN4	Perilipin-4					0.00682835	T	0.0150526	3.26395	FC	1.36592	H
1842	Q15063	POSTN	Periostin					0.185877	U	0.237708	1.63701	H	0.36	R
89	O14936	CASK	Peripheral plasma membrane protein CASK					0.00058058	T	0.00217367	0.155667	FC	-1.86305	H
1143	P41219	PRPH	Peripherin					0.00939718	T	0.0193414	1.72283	FC	1.30016	H
182	O60437	PPL	Periplakin					0.520366	U	0.578981	0.681251	H	-0.18	R
2162	Q92626	PXDN	Peroxidasin homolog					0.241322	U	0.298103	1.73242	H	0.32	R
1644	Q06830	PRDX1	Peroxiredoxin-1					0.000793627	T	0.00273913	0.557295	FC	-1.80022	H
1044	P32119	PRDX2	Peroxiredoxin-2					0.680704	T	0.73264	0.962298	FC	-0.187052	H
1706	Q13162	PRDX4	Peroxiredoxin-4					0.128325	T	0.174835	0.675908	FC	-0.712896	H
994	P30044	PRDX5	Peroxiredoxin-5, mitochondrial					0.000404235	T	0.0016801	0.196717	FC	-1.936	H
992	P30041	PRDX6	Peroxiredoxin-6					0.000303881	T	0.00140753	0.726614	FC	-1.99369	H
2323	Q9BRX8	PRXL2A	Peroxiredoxin-like 2A					3.44316e-05	T	0.000395493	0.204071	FC	-2.44336	H
1843	Q15067	ACOX1	Peroxisomal acyl-coenzyme A oxidase 1					0.000189458	T	0.0010396	0.134	FC	-2.08969	H
1301	P51659	HSD17B4	Peroxisomal multifunctional enzyme type 2					2.48847e-05	T	0.000356426	0.277732	FC	-2.51234	H
312	O95571	ETHE1	Persulfide dioxygenase ETHE1, mitochondrial					0.000915692	T	0.00304679	0.347878	FC	-1.77149	H
58	O00541	PES1	Pescadillo homolog					0.0493512	T	0.0769615	0.394099	FC	-0.94254	H
2135	Q8WW12	PCNP	PEST proteolytic signal-containing nuclear protein					0.000194608	T	0.00105542	0.275379	FC	-2.08422	H
2031	Q7RTV0	PHF5A	PHD finger-like domain-containing protein 5A					0.00209903	T	0.0059218	0.24752	FC	-1.60494	H
2655	Q9Y285	FARSA	Phenylalanine--tRNA ligase alpha subunit					0.000872846	T	0.00294427	0.34626	FC	-1.78111	H
2479	Q9NSD9	FARSB	Phenylalanine--tRNA ligase beta subunit					2.67601e-06	T	0.000164534	0.24846	FC	-3.0047	H
1578	Q00325	SLC25A3	Phosphate carrier protein, mitochondrial					7.09811e-05	T	0.000579679	0.403163	FC	-2.2917	H
315	O95674	CDS2	Phosphatidate cytidylyltransferase 2					0.483776	T	0.546818	1.48306	FC	0.319761	H
1001	P30086	PEBP1	Phosphatidylethanolamine-binding protein 1					0.00857881	T	0.0180562	0.691912	FC	-1.31899	H
2484	Q9NTJ5	SACM1L	Phosphatidylinositide phosphatase SAC1					0.000159851	T	0.000941909	0.300447	FC	-2.12439	H
1215	P48426	PIP4K2A	Phosphatidylinositol 5-phosphate 4-kinase type-2 alpha					0.0855364	T	0.123784	0.55456	FC	-0.813628	H
1577	Q00169	PITPNA	Phosphatidylinositol transfer protein alpha isoform					0.70438	T	0.751751	1.15597	FC	0.172404	H
1226	P48739	PITPNB	Phosphatidylinositol transfer protein beta isoform					0.0361087	T	0.0591159	0.648137	FC	-1.01282	H
1733	Q13492	PICALM	Phosphatidylinositol-binding clathrin assembly protein					0.518313	T	0.579987	0.875256	FC	-0.294661	H
304	O95394	PGM3	Phosphoacetylglucosamine mutase					0.00058284	U	0.00242604	0.531487	H	-0.92	R
1927	Q16822	PCK2	Phosphoenolpyruvate carboxykinase [GTP], mitochondrial					5.44316e-07	T	0.000101352	0.236977	FC	-3.38047	H
1102	P36871	PGM1	Phosphoglucomutase-1					0.377664	T	0.440608	0.904316	FC	-0.404516	H
2240	Q96G03	PGM2	Phosphoglucomutase-2					0.000100063	T	0.000712927	0.519213	FC	-2.2206	H
1850	Q15124	PGM5	Phosphoglucomutase-like protein 5					0.0020633	T	0.00583279	3.06865	FC	1.60839	H
351	P00558	PGK1	Phosphoglycerate kinase 1					0.000128656	T	0.000824164	0.499563	FC	-2.16887	H
817	P18669	PGAM1	Phosphoglycerate mutase 1					0.77164	T	0.81236	1.04047	FC	0.131767	H
741	P14555	PLA2G2A	Phospholipase A2, membrane associated					0.721363	U	0.77372	1	H	0.1	R
2650	Q9Y263	PLAA	Phospholipase A-2-activating protein					0.0257481	U	0.0426792	0.244805	H	-0.6	R
1998	Q6P4A8	PLBD1	Phospholipase B-like 1					0.0120757	T	0.0238021	0.297893	FC	-1.24802	H
2061	Q8IV08	PLD3	Phospholipase D3					0.0114155	T	0.0226768	0.498781	FC	-1.25975	H
1108	P36969	GPX4	Phospholipid hydroperoxide glutathione peroxidase					0.655857	T	0.709178	0.900494	FC	-0.202654	H
1362	P55058	PLTP	Phospholipid transfer protein					0.615642	U	0.674573	1.12059	H	0.14	R
2385	Q9H008	LHPP	Phospholysine phosphohistidine inorganic pyrophosphate phosphatase					0.037976	T	0.0617387	0.313564	FC	-1.0016	H
112	O15305	PMM2	Phosphomannomutase 2					0.0859973	T	0.124236	0.517764	FC	-0.812329	H
1851	Q15126	PMVK	Phosphomevalonate kinase					0.65232	T	0.705757	0.910147	FC	-0.204896	H
2434	Q9HAB8	PPCS	Phosphopantothenate--cysteine ligase	51	18	277	18	0.000195066	W	0.00170256	0.109838	FC	-2.58435	H
1806	Q14558	PRPSAP1	Phosphoribosyl pyrophosphate synthase-associated protein 1					0.063214	U	0.0931807	0.242106	H	-0.47	R
177	O60256	PRPSAP2	Phosphoribosyl pyrophosphate synthase-associated protein 2					0.000296925	U	0.00187244	0.0326417	H	-0.96	R
102	O15067	PFAS	Phosphoribosylformylglycinamidine synthase					2.03768e-06	T	0.00015809	0.132152	FC	-3.06743	H
2721	Q9Y617	PSAT1	Phosphoserine aminotransferase					0.00728456	U	0.0149711	0.321164	H	-0.72	R
2209	Q96BW5	PTER	Phosphotriesterase-related protein					0.000615742	T	0.00227784	0.126473	FC	-1.85122	H
1106	P36955	SERPINF1	Pigment epithelium-derived factor					0.0134778	T	0.0259431	1.76811	FC	1.22503	H
2400	Q9H307	PNN	Pinin					8.74e-05	U	0.00187244	0.000760972	H	-1	R
2381	Q9GZP4	PITHD1	PITH domain-containing protein 1					0.0888529	U	0.124687	0.359352	H	-0.46	R
1762	Q13835	PKP1	Plakophilin-1					0.119824	U	0.164439	0.49407	H	-0.42	R
2305	Q99959	PKP2	Plakophilin-2					0.00282727	U	0.00705051	0.214018	H	-0.8	R
2695	Q9Y446	PKP3	Plakophilin-3					0.140465	U	0.186908	0.156925	H	-0.4	R
440	P03952	KLKB1	Plasma kallikrein					0.209563	T	0.26605	0.636962	FC	-0.581964	H
905	P23634	ATP2B4	Plasma membrane calcium-transporting ATPase 4					0.00364011	T	0.00902796	2.12897	FC	1.49394	H
484	P05155	SERPING1	Plasma protease C1 inhibitor					0.775752	T	0.815766	1.07631	FC	0.129323	H
358	P00747	PLG	Plasminogen					0.00567523	T	0.0129819	2.12738	FC	1.40374	H
2098	Q8NC51	SERBP1	Plasminogen activator inhibitor 1 RNA-binding protein					4.15431e-06	T	0.000173179	0.21638	FC	-2.90472	H
1811	Q14651	PLS1	Plastin-1					0.000280977	T	0.00133237	0.227556	FC	-2.00957	H
728	P13796	LCP1	Plastin-2					0.280015	T	0.33974	0.783292	FC	-0.498109	H
729	P13797	PLS3	Plastin-3					0.0082708	T	0.0175582	0.537831	FC	-1.32653	H
430	P02775	PPBP	Platelet basic protein					0.307489	U	0.367173	1.22154	H	0.28	R
777	P16284	PECAM1	Platelet endothelial cell adhesion molecule					0.704396	U	0.755811	1.25481	H	0.11	R
431	P02776	PF4	Platelet factor 4					0.514154	T	0.576026	1.17978	FC	0.297631	H
1166	P43034	PAFAH1B1	Platelet-activating factor acetylhydrolase IB subunit alpha					0.00151516	T	0.00452604	0.562168	FC	-1.67042	H
1536	P68402	PAFAH1B2	Platelet-activating factor acetylhydrolase IB subunit beta					0.00101283	T	0.00329483	0.479792	FC	-1.75125	H
1847	Q15102	PAFAH1B3	Platelet-activating factor acetylhydrolase IB subunit gamma					0.00425433	T	0.0102611	0.233921	FC	-1.46236	H
615	P09619	PDGFRB	Platelet-derived growth factor receptor beta					0.9978	T	1	1.00142	FC	0.00125021	H
578	P08567	PLEK	Pleckstrin					0.300779	T	0.361634	0.684524	FC	-0.47646	H
1852	Q15149	PLEC	Plectin					0.00332699	T	0.00838655	1.5209	FC	1.51213	H
148	O43660	PLRG1	Pleiotropic regulator 1					0.00134917	U	0.00406935	0.00130312	H	-0.84	R
99	O15031	PLXNB2	Plexin-B2					0.79126	U	0.831529	0.890134	H	-0.08	R
622	P09874	PARP1	Poly [ADP-ribose] polymerase 1					0.000820681	T	0.00280659	0.250486	FC	-1.79349	H
1863	Q15365	PCBP1	Poly(rC)-binding protein 1					4.97074e-06	T	0.000189158	0.368844	FC	-2.86437	H
1864	Q15366	PCBP2	Poly(rC)-binding protein 2					9.35842e-05	T	0.000687844	0.365066	FC	-2.23442	H
1390	P57721	PCBP3	Poly(rC)-binding protein 3					0.000149393	U	0.00187244	0.000415122	H	-1	R
2589	Q9UHX1	PUF60	Poly(U)-binding-splicing factor PUF60					0.000388603	T	0.00164699	0.194837	FC	-1.94396	H
688	P11940	PABPC1	Polyadenylate-binding protein 1					8.17256e-06	T	0.000230565	0.252473	FC	-2.75381	H
2046	Q86U42	PABPN1	Polyadenylate-binding protein 2					0.141279	T	0.190165	0.727595	FC	-0.688114	H
1719	Q13310	PABPC4	Polyadenylate-binding protein 4					0.00356016	U	0.0085969	0.170597	H	-0.78	R
2386	Q9H074	PAIP1	Polyadenylate-binding protein-interacting protein 1					0.0113297	U	0.0214389	0.455151	H	-0.68	R
2666	Q9Y2S7	POLDIP2	Polymerase delta-interacting protein 2					3.08657e-05	T	0.000375043	0.170588	FC	-2.46651	H
384	P01833	PIGR	Polymeric immunoglobulin receptor					0.00058284	U	0.00242604	0.133419	H	-0.92	R
1671	Q10471	GALNT2	Polypeptide N-acetylgalactosaminyltransferase 2					0.0215981	T	0.0383494	0.384166	FC	-1.12499	H
939	P26599	PTBP1	Polypyrimidine tract-binding protein 1					8.8111e-06	T	0.000234217	0.252304	FC	-2.73723	H
318	O95758	PTBP3	Polypyrimidine tract-binding protein 3					0.00238934	T	0.00653907	0.125911	FC	-1.57888	H
2119	Q8TCS8	PNPT1	Polyribonucleotide nucleotidyltransferase 1, mitochondrial					0.000110671	U	0.00187244	0.000322382	H	-1	R
574	P08397	HMBS	Porphobilinogen deaminase					0.144617	T	0.194284	0.577815	FC	-0.682037	H
630	P0CG39	POTEJ	POTE ankyrin domain family member J					0.0309387	T	0.051899	1.99635	FC	1.04696	H
257	O75915	ARL6IP5	PRA1 family protein 3	35	10	114	10	0.00493719	W	0.0127234	0.176362	FC	-1.65025	H
207	O60925	PFDN1	Prefoldin subunit 1					0.00154628	T	0.00460422	0.254404	FC	-1.66634	H
2588	Q9UHV9	PFDN2	Prefoldin subunit 2					3.66551e-05	T	0.00041197	0.412269	FC	-2.43013	H
1447	P61758	VBP1	Prefoldin subunit 3					0.00297086	T	0.00770437	0.460949	FC	-1.53499	H
2284	Q99471	PFDN5	Prefoldin subunit 5					0.000475066	T	0.00187945	0.293462	FC	-1.90344	H
108	O15212	PFDN6	Prefoldin subunit 6					2.71174e-05	T	0.000369199	0.25792	FC	-2.49403	H
404	P02545	LMNA	Prelamin-A/C					0.0265381	T	0.0456129	1.32942	FC	1.08048	H
2628	Q9UMS4	PRPF19	Pre-mRNA-processing factor 19					0.000781915	T	0.00271291	0.449457	FC	-1.8032	H
229	O75400	PRPF40A	Pre-mRNA-processing factor 40 homolog A					0.73373	U	0.779501	0.70085	H	-0.1	R
283	O94906	PRPF6	Pre-mRNA-processing factor 6					0.00711723	T	0.01553	0.248543	FC	-1.35742	H
1997	Q6P2Q9	PRPF8	Pre-mRNA-processing-splicing factor 8					0.000572149	T	0.00214498	0.358369	FC	-1.86599	H
124	O43143	DHX15	Pre-mRNA-splicing factor ATP-dependent RNA helicase DHX15	35	4	91	1	0.919829	W	0.943475	0.974736	FC	-0.0460814	H
259	O75934	BCAS2	Pre-mRNA-splicing factor SPF27					0.03367	U	0.0543901	0.0773307	H	-0.56	R
2584	Q9UHG3	PCYOX1	Prenylcysteine oxidase 1					0.041999	T	0.067184	0.716527	FC	-0.979056	H
1963	Q5JRX3	PITRM1	Presequence protease, mitochondrial					0.00176343	T	0.00512513	0.0966769	FC	-1.63995	H
2251	Q96IZ0	PAWR	PRKC apoptosis WT1 regulator protein					0.0116603	T	0.0231302	2.05448	FC	1.25533	H
1184	P46087	NOP2	Probable 28S rRNA (cytosine(4447)-C(5))-methyltransferase					0.000498747	T	0.00195098	0.109664	FC	-1.89364	H
2102	Q8NDH3	NPEPL1	Probable aminopeptidase NPEPL1					0.0369185	U	0.0590205	0.208265	H	-0.56	R
2171	Q92841	DDX17	Probable ATP-dependent RNA helicase DDX17					1.17719e-05	T	0.000258744	0.261575	FC	-2.67377	H
2241	Q96GQ7	DDX27	Probable ATP-dependent RNA helicase DDX27					0.0184873	U	0.0325568	0.00180685	H	-0.62	R
2023	Q7L014	DDX46	Probable ATP-dependent RNA helicase DDX46					0.00013173	U	0.00187244	0.000455253	H	-1	R
2391	Q9H0S4	DDX47	Probable ATP-dependent RNA helicase DDX47					0.492376	U	0.555639	1	H	-0.18	R
803	P17844	DDX5	Probable ATP-dependent RNA helicase DDX5					0.0529838	T	0.0818495	0.57644	FC	-0.926296	H
932	P26196	DDX6	Probable ATP-dependent RNA helicase DDX6					0.000268192	T	0.00129595	0.32462	FC	-2.01901	H
314	O95671	ASMTL	Probable bifunctional dTTP/UTP pyrophosphatase/methyltransferase protein					0.842486	T	0.874196	0.913787	FC	-0.090161	H
270	O76071	CIAO1	Probable cytosolic iron-sulfur protein assembly protein CIAO1					0.240613	U	0.298103	0.639968	H	-0.32	R
2073	Q8N0Y7	PGAM4	Probable phosphoglycerate mutase 4					0.0802767	U	0.114278	0.468079	H	-0.42	R
2401	Q9H3G5	CPVL	Probable serine carboxypeptidase CPVL					0.996646	T	1	1.00135	FC	0.00190619	H
2183	Q93008	USP9X	Probable ubiquitin carboxyl-terminal hydrolase FAF-X					0.00178354	T	0.00517819	0.197556	FC	-1.63768	H
619	P09668	CTSH	Pro-cathepsin H					0.000243518	T	0.00122963	0.305215	FC	-2.03861	H
1848	Q15113	PCOLCE	Procollagen C-endopeptidase enhancer 1					0.00881798	T	0.0184346	2.56419	FC	1.31331	H
2092	Q8NBJ5	COLGALT1	Procollagen galactosyltransferase 1					0.105249	T	0.147496	0.782771	FC	-0.762839	H
1608	Q02809	PLOD1	Procollagen-lysine,2-oxoglutarate 5-dioxygenase 1					0.520523	U	0.578981	0.742388	H	-0.18	R
51	O00469	PLOD2	Procollagen-lysine,2-oxoglutarate 5-dioxygenase 2					0.397182	T	0.459349	1.43401	FC	0.387878	H
545	P07737	PFN1	Profilin-1					0.0658706	T	0.0988591	0.862151	FC	-0.875802	H
2129	Q8WUM4	PDCD6IP	Programmed cell death 6-interacting protein					1.36356e-06	T	0.000140326	0.46308	FC	-3.16104	H
2338	Q9BUL8	PDCD10	Programmed cell death protein 10					3.03492e-06	T	0.000169531	0.250973	FC	-2.97593	H
1947	Q53EL6	PDCD4	Programmed cell death protein 4	35	3	6	3	0.000191537	W	0.00170256	0.099316	FC	-2.65509	H
76	O14737	PDCD5	Programmed cell death protein 5					0.0160608	T	0.030248	0.589178	FC	-1.1881	H
218	O75340	PDCD6	Programmed cell death protein 6					1.77265e-05	T	0.00029469	0.432113	FC	-2.58506	H
973	P28799	GRN	Progranulin					0.223818	T	0.281588	0.707807	FC	-0.563416	H
1067	P35232	PHB1	Prohibitin					9.12986e-06	T	0.000234217	0.354285	FC	-2.72942	H
2292	Q99623	PHB2	Prohibitin-2					3.91686e-05	T	0.000423838	0.377333	FC	-2.41614	H
1769	Q14005	IL16	Pro-interleukin-16					0.0357297	U	0.0574184	0.219643	H	-0.53	R
1306	P51888	PRELP	Prolargin					0.0276346	T	0.0471369	2.0003	FC	1.07167	H
689	P12004	PCNA	Proliferating cell nuclear antigen					5.48376e-05	T	0.000520957	0.185344	FC	-2.34549	H
2643	Q9UQ80	PA2G4	Proliferation-associated protein 2G4					0.000348435	T	0.00153498	0.408699	FC	-1.96601	H
1652	Q07954	LRP1	Prolow-density lipoprotein receptor-related protein 1					0.140235	T	0.188941	1.50733	FC	0.69004	H
1940	Q32P28	P3H1	Prolyl 3-hydroxylase 1					0.139859	T	0.188526	1.76921	FC	0.690736	H
719	P13674	P4HA1	Prolyl 4-hydroxylase subunit alpha-1					0.40114	T	0.463493	1.2888	FC	0.384569	H
119	O15460	P4HA2	Prolyl 4-hydroxylase subunit alpha-2					0.015253	T	0.0289217	3.23987	FC	1.199	H
1213	P48147	PREP	Prolyl endopeptidase					0.745953	T	0.789783	0.933963	FC	-0.147133	H
1685	Q12884	FAP	Prolyl endopeptidase FAP					0.850107	U	0.883643	0.93989	H	-0.06	R
139	O43490	PROM1	Prominin-1					0.00139807	X	0.122026	only in B		0
490	P05165	PCCA	Propionyl-CoA carboxylase alpha chain, mitochondrial					0.00630453	T	0.0141434	0.281608	FC	-1.38226	H
491	P05166	PCCB	Propionyl-CoA carboxylase beta chain, mitochondrial	36	5	174	4	0.000824674	W	0.00367804	0.236899	FC	-2.02518	H
542	P07602	PSAP	Prosaposin					0.913775	T	0.93761	1.01456	FC	0.0491083	H
1916	Q16647	PTGIS	Prostacyclin synthase					0.0113297	U	0.0214389	2.25891	H	0.68	R
2422	Q9H7Z7	PTGES2	Prostaglandin E synthase 2					8.40973e-07	T	0.000123673	0.243343	FC	-3.27555	H
1855	Q15185	PTGES3	Prostaglandin E synthase 3					0.108078	T	0.150856	0.65396	FC	-0.756239	H
2539	Q9P2B2	PTGFRN	Prostaglandin F2 receptor negative regulator					0.000521304	T	0.00200275	0.327395	FC	-1.88473	H
894	P23219	PTGS1	Prostaglandin G/H synthase 1					0.000273296	T	0.00131154	3.4505	FC	2.01519	H
1073	P35354	PTGS2	Prostaglandin G/H synthase 2					0.623176	U	0.677777	1.33304	H	0.14	R
1825	Q14914	PTGR1	Prostaglandin reductase 1					0.311051	T	0.372062	0.820768	FC	-0.46615	H
1898	Q16186	ADRM1	Proteasomal ubiquitin receptor ADRM1					0.00250509	T	0.00674057	0.286014	FC	-1.56936	H
1641	Q06323	PSME1	Proteasome activator complex subunit 1					3.74016e-05	T	0.000415069	0.426534	FC	-2.42587	H
2617	Q9UL46	PSME2	Proteasome activator complex subunit 2					0.000333647	T	0.00148624	0.42258	FC	-1.97478	H
1435	P61289	PSME3	Proteasome activator complex subunit 3	27	8	63	8	0.000838993	W	0.00371954	0.100247	FC	-2.16307	H
1976	Q5VYK3	ECPAS	Proteasome adapter and scaffold protein ECM29					0.0106976	T	0.0214758	0.368711	FC	-1.27327	H
2150	Q92530	PSMF1	Proteasome inhibitor PI31 subunit					0.00728456	U	0.0149711	0.400815	H	-0.72	R
926	P25786	PSMA1	Proteasome subunit alpha type-1					0.590071	T	0.647062	0.91037	FC	-0.245308	H
927	P25787	PSMA2	Proteasome subunit alpha type-2					0.000933023	T	0.0030876	0.502135	FC	-1.76773	H
928	P25788	PSMA3	Proteasome subunit alpha type-3					0.000133612	T	0.000836722	0.534053	FC	-2.16112	H
929	P25789	PSMA4	Proteasome subunit alpha type-4					0.000121969	T	0.000800565	0.436826	FC	-2.17984	H
963	P28066	PSMA5	Proteasome subunit alpha type-5					1.55896e-06	T	0.000140326	0.374938	FC	-3.12968	H
1409	P60900	PSMA6	Proteasome subunit alpha type-6					3.08596e-05	T	0.000375043	0.350082	FC	-2.46656	H
82	O14818	PSMA7	Proteasome subunit alpha type-7					0.000101758	T	0.000714094	0.378076	FC	-2.21714	H
846	P20618	PSMB1	Proteasome subunit beta type-1					1.5114e-05	T	0.000289132	0.327928	FC	-2.61948	H
1134	P40306	PSMB10	Proteasome subunit beta type-10					0.00170625	U	0.00484797	0.292957	H	-0.84	R
1246	P49721	PSMB2	Proteasome subunit beta type-2					6.58817e-05	T	0.000559294	0.347505	FC	-2.30721	H
1245	P49720	PSMB3	Proteasome subunit beta type-3					3.86118e-05	T	0.000419622	0.381061	FC	-2.41916	H
964	P28070	PSMB4	Proteasome subunit beta type-4					6.42368e-05	T	0.00055043	0.285346	FC	-2.31248	H
966	P28074	PSMB5	Proteasome subunit beta type-5					0.0129154	T	0.0250506	0.550074	FC	-1.23396	H
965	P28072	PSMB6	Proteasome subunit beta type-6					0.0662895	T	0.0993809	0.674616	FC	-0.874314	H
2279	Q99436	PSMB7	Proteasome subunit beta type-7					0.0376353	U	0.0590205	0.519564	H	-0.56	R
961	P28062	PSMB8	Proteasome subunit beta type-8					0.000131853	T	0.000830434	0.363271	FC	-2.16384	H
962	P28065	PSMB9	Proteasome subunit beta type-9					0.00781665	T	0.016768	0.502312	FC	-1.33816	H
667	P11171	EPB41	Protein 4.1					0.0275633	T	0.047114	0.562539	FC	-1.07223	H
2106	Q8NFV4	ABHD11	Protein ABHD11					0.00039682	T	0.00166536	0.1536	FC	-1.93974	H
2249	Q96IU4	ABHD14B	Protein ABHD14B					4.98523e-05	T	0.000488552	0.4677	FC	-2.36544	H
2062	Q8IVF2	AHNAK2	Protein AHNAK2					0.117004	T	0.161312	1.88256	FC	0.736346	H
425	P02760	AMBP	Protein AMBP					0.0339581	T	0.056221	1.47105	FC	1.02643	H
2304	Q99873	PRMT1	Protein arginine N-methyltransferase 1					0.000784083	T	0.00271705	0.347962	FC	-1.80265	H
77	O14744	PRMT5	Protein arginine N-methyltransferase 5					3.453e-05	T	0.000395493	0.256189	FC	-2.44275	H
2614	Q9UKV8	AGO2	Protein argonaute-2					0.0151406	T	0.0287671	0.381882	FC	-1.20056	H
1144	P41223	BUD31	Protein BUD31 homolog					0.0388671	X	0.728563	only in B		0
2658	Q9Y2B0	CNPY2	Protein canopy homolog 2					0.0183829	T	0.0336899	0.59587	FC	-1.15945	H
2615	Q9UKY7	CDV3	Protein CDV3 homolog					0.00453527	T	0.0107988	0.610143	FC	-1.44938	H
206	O60888	CUTA	Protein CutA					0.998174	T	1	0.999395	FC	-0.00103768	H
1086	P35659	DEK	Protein DEK					0.0264085	T	0.045446	0.368912	FC	-1.08155	H
190	O60610	DIAPH1	Protein diaphanous homolog 1					0.000840971	T	0.00285399	0.147903	FC	-1.78858	H
531	P07237	P4HB	Protein disulfide-isomerase					0.352015	T	0.414144	0.811229	FC	-0.427283	H
1002	P30101	PDIA3	Protein disulfide-isomerase A3					0.000507529	T	0.00196879	0.547072	FC	-1.89012	H
717	P13667	PDIA4	Protein disulfide-isomerase A4					0.0146244	T	0.0279003	0.529603	FC	-1.20787	H
1805	Q14554	PDIA5	Protein disulfide-isomerase A5					0.841226	T	0.873436	0.948414	FC	-0.0908927	H
1846	Q15084	PDIA6	Protein disulfide-isomerase A6					0.157489	T	0.208765	0.753634	FC	-0.659641	H
2089	Q8N8S7	ENAH	Protein enabled homolog					0.00346706	T	0.00864597	1.69567	FC	1.50379	H
1231	P49257	LMAN1	Protein ERGIC-53					0.161972	U	0.211892	0.572598	H	-0.38	R
2210	Q96C01	FAM136A	Protein FAM136A					0.543362	T	0.603315	1.21044	FC	0.27704	H
2196	Q96A26	FAM162A	Protein FAM162A					1.48495e-05	T	0.000289132	0.313967	FC	-2.6233	H
2148	Q92520	FAM3C	Protein FAM3C					0.00566534	T	0.0129699	0.461525	FC	-1.4041	H
2208	Q96BQ1	FAM3D	Protein FAM3D					0.0601536	T	0.091708	0.539606	FC	-0.896994	H
2492	Q9NUQ9	CYRIB	Protein FAM49B					0.0106562	T	0.0214163	0.569136	FC	-1.27408	H
2100	Q8NCA5	FAM98A	Protein FAM98A					0.326447	T	0.387821	1.6981	FC	0.451142	H
1946	Q52LJ0	FAM98B	Protein FAM98B					0.00217124	T	0.00605822	0.233674	FC	-1.59814	H
1234	P49354	FNTA	Protein farnesyltransferase/geranylgeranyltransferase type-1 subunit alpha					0.00233922	T	0.00644807	0.484908	FC	-1.58315	H
1694	Q13045	FLII	Protein flightless-1 homolog					0.0103353	T	0.0208724	0.617808	FC	-1.28043	H
795	P17252	PRKCA	Protein kinase C alpha type					0.0109769	T	0.0218677	1.88457	FC	1.26791	H
2634	Q9UNF0	PACSIN2	Protein kinase C and casein kinase substrate in neurons protein 2					9.27595e-06	T	0.000234217	0.498067	FC	-2.72593	H
2490	Q9NUP9	LIN7C	Protein lin-7 homolog C					4.63786e-05	T	0.000464285	0.299906	FC	-2.38059	H
2047	Q86UE4	MTDH	Protein LYRIC					0.0101037	T	0.0204936	0.371515	FC	-1.28514	H
1437	P61326	MAGOH	Protein mago nashi homolog					1.85698e-05	T	0.00029469	0.242669	FC	-2.57505	H
1944	Q460N5	PARP14	Protein mono-ADP-ribosyltransferase PARP14					0.00228308	T	0.00630727	0.302076	FC	-1.58804	H
2610	Q9UKK3	PARP4	Protein mono-ADP-ribosyltransferase PARP4					0.0103118	T	0.020855	0.335702	FC	-1.28091	H
2068	Q8IXQ6	PARP9	Protein mono-ADP-ribosyltransferase PARP9					0.140465	U	0.186908	0.355939	H	-0.4	R
[truncated: 744 more rows]

## Sheet: B
Table S1. Proteins identified in the rectal cancer tissue.
B. Performance of univariate classification models based on specific proteins.
Preotein name	Accession	TPR	TNR	PPV	NPV	ACC	F1	ROC_AUC
Nascent polypeptide-associated complex subunit alpha, muscle-specific form OS=Homo sapiens OX=9606 GN=NACA PE=1 SV=1	E9PAV3	1	1	1	1	1	1	1
PDZ and LIM domain protein 1 OS=Homo sapiens OX=9606 GN=PDLIM1 PE=1 SV=4	O00151	0.9	1	1	0.909091	0.95	0.947368	1
Galectin-9 OS=Homo sapiens OX=9606 GN=LGALS9 PE=1 SV=2	O00182	0.8	1	1	0.833333	0.9	0.888889	1
Chloride intracellular channel protein 1 OS=Homo sapiens OX=9606 GN=CLIC1 PE=1 SV=4	O00299	0.8	1	1	0.833333	0.9	0.888889	1
Ladinin-1 OS=Homo sapiens OX=9606 GN=LAD1 PE=1 SV=2	O00515	0.8	1	1	0.833333	0.9	0.888889	1
PDZ domain-containing protein GIPC1 OS=Homo sapiens OX=9606 GN=GIPC1 PE=1 SV=2	O14908	0.8	1	1	0.833333	0.9	0.888889	1
Hepatocyte growth factor-regulated tyrosine kinase substrate OS=Homo sapiens OX=9606 GN=HGS PE=1 SV=1	O14964	1	1	1	1	1	1	1
Heterogeneous nuclear ribonucleoprotein D-like OS=Homo sapiens OX=9606 GN=HNRNPDL PE=1 SV=3	O14979	0.9	1	1	0.909091	0.95	0.947368	1
Phosphoribosylformylglycinamidine synthase OS=Homo sapiens OX=9606 GN=PFAS PE=1 SV=4	O15067	0.8	1	1	0.833333	0.9	0.888889	1
Protein phosphatase 1G OS=Homo sapiens OX=9606 GN=PPM1G PE=1 SV=1	O15355	0.8	1	1	0.833333	0.9	0.888889	1
Eukaryotic translation initiation factor 3 subunit H OS=Homo sapiens OX=9606 GN=EIF3H PE=1 SV=1	O15372	1	1	1	1	1	1	1
Claudin-3 OS=Homo sapiens OX=9606 GN=CLDN3 PE=1 SV=1	O15551	0.9	1	1	0.909091	0.95	0.947368	1
Cytochrome b5 type B OS=Homo sapiens OX=9606 GN=CYB5B PE=1 SV=2	O43169	1	0.9	0.909091	1	0.95	0.952381	1
Peptidyl-prolyl cis-trans isomerase H OS=Homo sapiens OX=9606 GN=PPIH PE=1 SV=1	O43447	0.9	1	1	0.909091	0.95	0.947368	1
Band 4.1-like protein 2 OS=Homo sapiens OX=9606 GN=EPB41L2 PE=1 SV=1	O43491	0.8	1	1	0.833333	0.9	0.888889	1
BUB3-interacting and GLEBS motif-containing protein ZNF207 OS=Homo sapiens OX=9606 GN=ZNF207 PE=1 SV=1	O43670	1	1	1	1	1	1	1
Synaptogyrin-2 OS=Homo sapiens OX=9606 GN=SYNGR2 PE=1 SV=1	O43760	1	1	1	1	1	1	1
Isocitrate dehydrogenase [NAD] subunit beta, mitochondrial OS=Homo sapiens OX=9606 GN=IDH3B PE=1 SV=2	O43837	0.9	1	1	0.909091	0.95	0.947368	1
GDP-mannose 4,6 dehydratase OS=Homo sapiens OX=9606 GN=GMDS PE=1 SV=1	O60547	0.9	1	1	0.909091	0.95	0.947368	1
H/ACA ribonucleoprotein complex subunit DKC1 OS=Homo sapiens OX=9606 GN=DKC1 PE=1 SV=3	O60832	1	1	1	1	1	1	1
Rho-associated protein kinase 2 OS=Homo sapiens OX=9606 GN=ROCK2 PE=1 SV=4	O75116	1	1	1	1	1	1	1
Vacuolar protein sorting-associated protein 4B OS=Homo sapiens OX=9606 GN=VPS4B PE=1 SV=2	O75351	0.8	1	1	0.833333	0.9	0.888889	1
Citrate synthase, mitochondrial OS=Homo sapiens OX=9606 GN=CS PE=1 SV=2	O75390	0.9	0.9	0.9	0.9	0.9	0.9	1
Vacuolar protein sorting-associated protein 26A OS=Homo sapiens OX=9606 GN=VPS26A PE=1 SV=2	O75436	0.9	1	1	0.909091	0.95	0.947368	1
Mitochondrial-processing peptidase subunit beta OS=Homo sapiens OX=9606 GN=PMPCB PE=1 SV=2	O75439	0.9	1	1	0.909091	0.95	0.947368	1
26S proteasome non-ATPase regulatory subunit 10 OS=Homo sapiens OX=9606 GN=PSMD10 PE=1 SV=1	O75832	1	1	1	1	1	1	1
N(G),N(G)-dimethylarginine dimethylaminohydrolase 1 OS=Homo sapiens OX=9606 GN=DDAH1 PE=1 SV=3	O94760	1	1	1	1	1	1	1
Mitochondrial import receptor subunit TOM70 OS=Homo sapiens OX=9606 GN=TOMM70 PE=1 SV=1	O94826	1	1	1	1	1	1	1
Glutaminase kidney isoform, mitochondrial OS=Homo sapiens OX=9606 GN=GLS PE=1 SV=1	O94925	0.9	1	1	0.909091	0.95	0.947368	1
NADH dehydrogenase [ubiquinone] 1 beta subcomplex subunit 4 OS=Homo sapiens OX=9606 GN=NDUFB4 PE=1 SV=3	O95168	0.9	1	1	0.909091	0.95	0.947368	1
Mitochondrial proton/calcium exchanger protein OS=Homo sapiens OX=9606 GN=LETM1 PE=1 SV=1	O95202	1	1	1	1	1	1	1
NADH dehydrogenase [ubiquinone] 1 alpha subcomplex subunit 10, mitochondrial OS=Homo sapiens OX=9606 GN=NDUFA10 PE=1 SV=1	O95299	0.7	1	1	0.769231	0.85	0.823529	1
Importin-7 OS=Homo sapiens OX=9606 GN=IPO7 PE=1 SV=1	O95373	0.9	0.9	0.9	0.9	0.9	0.9	1
Supervillin OS=Homo sapiens OX=9606 GN=SVIL PE=1 SV=2	O95425	1	1	1	1	1	1	1
NADH dehydrogenase [ubiquinone] 1 beta subcomplex subunit 10 OS=Homo sapiens OX=9606 GN=NDUFB10 PE=1 SV=3	O96000	0.9	1	1	0.909091	0.95	0.947368	1
Hypoxanthine-guanine phosphoribosyltransferase OS=Homo sapiens OX=9606 GN=HPRT1 PE=1 SV=2	P00492	0.9	0.9	0.9	0.9	0.9	0.9	1
Aspartate aminotransferase, mitochondrial OS=Homo sapiens OX=9606 GN=GOT2 PE=1 SV=3	P00505	1	1	1	1	1	1	1
Immunoglobulin kappa constant OS=Homo sapiens OX=9606 GN=IGKC PE=1 SV=2	P01834	0.9	0.9	0.9	0.9	0.9	0.9	1
Sodium/potassium-transporting ATPase subunit alpha-1 OS=Homo sapiens OX=9606 GN=ATP1A1 PE=1 SV=1	P05023	1	0.9	0.909091	1	0.95	0.952381	1
Aldehyde dehydrogenase, mitochondrial OS=Homo sapiens OX=9606 GN=ALDH2 PE=1 SV=2	P05091	1	0.9	0.909091	1	0.95	0.952381	1
ADP/ATP translocase 2 OS=Homo sapiens OX=9606 GN=SLC25A5 PE=1 SV=7	P05141	1	1	1	1	1	1	1
Lupus La protein OS=Homo sapiens OX=9606 GN=SSB PE=1 SV=2	P05455	1	0.9	0.909091	1	0.95	0.952381	1
Carcinoembryonic antigen-related cell adhesion molecule 5 OS=Homo sapiens OX=9606 GN=CEACAM5 PE=1 SV=3	P06731	1	0.9	0.909091	1	0.95	0.952381	1
Fumarate hydratase, mitochondrial OS=Homo sapiens OX=9606 GN=FH PE=1 SV=3	P07954	0.9	1	1	0.909091	0.95	0.947368	1
Heat shock protein HSP 90-beta OS=Homo sapiens OX=9606 GN=HSP90AB1 PE=1 SV=4	P08238	1	0.9	0.909091	1	0.95	0.952381	1
U2 small nuclear ribonucleoprotein B'' OS=Homo sapiens OX=9606 GN=SNRPB2 PE=1 SV=1	P08579	0.8	1	1	0.833333	0.9	0.888889	1
Annexin A4 OS=Homo sapiens OX=9606 GN=ANXA4 PE=1 SV=4	P09525	1	1	1	1	1	1	1
Dihydrolipoyl dehydrogenase, mitochondrial OS=Homo sapiens OX=9606 GN=DLD PE=1 SV=2	P09622	1	0.9	0.909091	1	0.95	0.952381	1
U2 small nuclear ribonucleoprotein A' OS=Homo sapiens OX=9606 GN=SNRPA1 PE=1 SV=2	P09661	0.9	1	1	0.909091	0.95	0.947368	1
Dihydrolipoyllysine-residue acetyltransferase component of pyruvate dehydrogenase complex, mitochondrial OS=Homo sapiens OX=9606 GN=DLAT PE=1 SV=3	P10515	0.9	0.8	0.818182	0.888889	0.85	0.857143	1
Thioredoxin OS=Homo sapiens OX=9606 GN=TXN PE=1 SV=3	P10599	1	1	1	1	1	1	1
60 kDa heat shock protein, mitochondrial OS=Homo sapiens OX=9606 GN=HSPD1 PE=1 SV=2	P10809	1	1	1	1	1	1	1
Uridine 5'-monophosphate synthase OS=Homo sapiens OX=9606 GN=UMPS PE=1 SV=1	P11172	0.9	0.9	0.9	0.9	0.9	0.9	1
Ras-related protein Ral-A OS=Homo sapiens OX=9606 GN=RALA PE=1 SV=1	P11233	1	1	1	1	1	1	1
C-1-tetrahydrofolate synthase, cytoplasmic OS=Homo sapiens OX=9606 GN=MTHFD1 PE=1 SV=3	P11586	1	0.9	0.909091	1	0.95	0.952381	1
Ribose-phosphate pyrophosphokinase 2 OS=Homo sapiens OX=9606 GN=PRPS2 PE=1 SV=2	P11908	0.9	1	1	0.909091	0.95	0.947368	1
Proliferating cell nuclear antigen OS=Homo sapiens OX=9606 GN=PCNA PE=1 SV=1	P12004	1	0.9	0.909091	1	0.95	0.952381	1
ADP/ATP translocase 1 OS=Homo sapiens OX=9606 GN=SLC25A4 PE=1 SV=4	P12235	1	0.8	0.833333	1	0.9	0.909091	1
Nucleoprotein TPR OS=Homo sapiens OX=9606 GN=TPR PE=1 SV=3	P12270	0.9	1	1	0.909091	0.95	0.947368	1
Cadherin-1 OS=Homo sapiens OX=9606 GN=CDH1 PE=1 SV=3	P12830	0.8	1	1	0.833333	0.9	0.888889	1
X-ray repair cross-complementing protein 6 OS=Homo sapiens OX=9606 GN=XRCC6 PE=1 SV=2	P12956	1	1	1	1	1	1	1
X-ray repair cross-complementing protein 5 OS=Homo sapiens OX=9606 GN=XRCC5 PE=1 SV=3	P13010	0.8	1	1	0.833333	0.9	0.888889	1
Interferon-induced transmembrane protein 1 OS=Homo sapiens OX=9606 GN=IFITM1 PE=1 SV=3	P13164	0.9	1	1	0.909091	0.95	0.947368	1
Acylamino-acid-releasing enzyme OS=Homo sapiens OX=9606 GN=APEH PE=1 SV=4	P13798	0.8	1	1	0.833333	0.9	0.888889	1
Electron transfer flavoprotein subunit alpha, mitochondrial OS=Homo sapiens OX=9606 GN=ETFA PE=1 SV=1	P13804	1	1	1	1	1	1	1
Cytochrome c oxidase subunit 6B1 OS=Homo sapiens OX=9606 GN=COX6B1 PE=1 SV=2	P14854	1	0.8	0.833333	1	0.9	0.909091	1
Heterogeneous nuclear ribonucleoprotein L OS=Homo sapiens OX=9606 GN=HNRNPL PE=1 SV=2	P14866	0.9	1	1	0.909091	0.95	0.947368	1
Junction plakoglobin OS=Homo sapiens OX=9606 GN=JUP PE=1 SV=3	P14923	0.9	1	1	0.909091	0.95	0.947368	1
Cytochrome b-c1 complex subunit 7 OS=Homo sapiens OX=9606 GN=UQCRB PE=1 SV=2	P14927	1	1	1	1	1	1	1
Ezrin OS=Homo sapiens OX=9606 GN=EZR PE=1 SV=4	P15311	0.9	1	1	0.909091	0.95	0.947368	1
Epithelial cell adhesion molecule OS=Homo sapiens OX=9606 GN=EPCAM PE=1 SV=2	P16422	1	1	1	1	1	1	1
NADPH--cytochrome P450 reductase OS=Homo sapiens OX=9606 GN=POR PE=1 SV=2	P16435	1	0.8	0.833333	1	0.9	0.909091	1
ATP-dependent 6-phosphofructokinase, liver type OS=Homo sapiens OX=9606 GN=PFKL PE=1 SV=6	P17858	0.8	1	1	0.833333	0.9	0.888889	1
T-complex protein 1 subunit alpha OS=Homo sapiens OX=9606 GN=TCP1 PE=1 SV=1	P17987	0.8	1	1	0.833333	0.9	0.888889	1
Glutathione peroxidase 2 OS=Homo sapiens OX=9606 GN=GPX2 PE=1 SV=3	P18283	0.9	1	1	0.909091	0.95	0.947368	1
Nucleolin OS=Homo sapiens OX=9606 GN=NCL PE=1 SV=3	P19338	0.9	1	1	0.909091	0.95	0.947368	1
Voltage-dependent anion-selective channel protein 1 OS=Homo sapiens OX=9606 GN=VDAC1 PE=1 SV=2	P21796	0.9	0.9	0.9	0.9	0.9	0.9	1
Multifunctional protein ADE2 OS=Homo sapiens OX=9606 GN=PAICS PE=1 SV=3	P22234	1	0.9	0.909091	1	0.95	0.952381	1
Non-specific lipid-transfer protein OS=Homo sapiens OX=9606 GN=SCP2 PE=1 SV=2	P22307	0.8	1	1	0.833333	0.9	0.888889	1
Heterogeneous nuclear ribonucleoproteins A2/B1 OS=Homo sapiens OX=9606 GN=HNRNPA2B1 PE=1 SV=2	P22626	0.9	1	1	0.909091	0.95	0.947368	1
Adenosylhomocysteinase OS=Homo sapiens OX=9606 GN=AHCY PE=1 SV=4	P23526	1	0.9	0.909091	1	0.95	0.952381	1
3-mercaptopyruvate sulfurtransferase OS=Homo sapiens OX=9606 GN=MPST PE=1 SV=3	P25325	1	0.8	0.833333	1	0.9	0.909091	1
DnaJ homolog subfamily B member 1 OS=Homo sapiens OX=9606 GN=DNAJB1 PE=1 SV=4	P25685	1	1	1	1	1	1	1
Probable ATP-dependent RNA helicase DDX6 OS=Homo sapiens OX=9606 GN=DDX6 PE=1 SV=2	P26196	0.9	0.8	0.818182	0.888889	0.85	0.857143	1
CAD protein OS=Homo sapiens OX=9606 GN=CAD PE=1 SV=3	P27708	0.9	1	1	0.909091	0.95	0.947368	1
Proteasome subunit alpha type-5 OS=Homo sapiens OX=9606 GN=PSMA5 PE=1 SV=3	P28066	1	1	1	1	1	1	1
Proteasome subunit beta type-4 OS=Homo sapiens OX=9606 GN=PSMB4 PE=1 SV=4	P28070	0.6	1	1	0.714286	0.8	0.75	1
Enoyl-CoA hydratase, mitochondrial OS=Homo sapiens OX=9606 GN=ECHS1 PE=1 SV=4	P30084	0.9	1	1	0.909091	0.95	0.947368	1
Adenylosuccinate lyase OS=Homo sapiens OX=9606 GN=ADSL PE=1 SV=2	P30566	0.9	1	1	0.909091	0.95	0.947368	1
Sorcin OS=Homo sapiens OX=9606 GN=SRI PE=1 SV=1	P30626	1	0.8	0.833333	1	0.9	0.909091	1
Succinate dehydrogenase [ubiquinone] flavoprotein subunit, mitochondrial OS=Homo sapiens OX=9606 GN=SDHA PE=1 SV=2	P31040	0.9	0.9	0.9	0.9	0.9	0.9	1
Bifunctional purine biosynthesis protein PURH OS=Homo sapiens OX=9606 GN=ATIC PE=1 SV=3	P31939	1	1	1	1	1	1	1
Heterogeneous nuclear ribonucleoprotein H OS=Homo sapiens OX=9606 GN=HNRNPH1 PE=1 SV=4	P31943	0.8	1	1	0.833333	0.9	0.888889	1
14-3-3 protein sigma OS=Homo sapiens OX=9606 GN=SFN PE=1 SV=1	P31947	0.9	1	1	0.909091	0.95	0.947368	1
DNA replication licensing factor MCM4 OS=Homo sapiens OX=9606 GN=MCM4 PE=1 SV=5	P33991	0.9	0.9	0.9	0.9	0.9	0.9	1
Serine hydroxymethyltransferase, mitochondrial OS=Homo sapiens OX=9606 GN=SHMT2 PE=1 SV=3	P34897	0.9	1	1	0.909091	0.95	0.947368	1
Catenin beta-1 OS=Homo sapiens OX=9606 GN=CTNNB1 PE=1 SV=1	P35222	1	1	1	1	1	1	1
Prohibitin OS=Homo sapiens OX=9606 GN=PHB PE=1 SV=1	P35232	1	1	1	1	1	1	1
Sepiapterin reductase OS=Homo sapiens OX=9606 GN=SPR PE=1 SV=1	P35270	1	1	1	1	1	1	1
RNA-binding protein FUS OS=Homo sapiens OX=9606 GN=FUS PE=1 SV=1	P35637	0.9	1	1	0.909091	0.95	0.947368	1
RNA-binding motif protein, X chromosome OS=Homo sapiens OX=9606 GN=RBMX PE=1 SV=3	P38159	0.8	1	1	0.833333	0.9	0.888889	1
Eukaryotic initiation factor 4A-III OS=Homo sapiens OX=9606 GN=EIF4A3 PE=1 SV=4	P38919	0.8	0.9	0.888889	0.818182	0.85	0.842105	1
Malate dehydrogenase, mitochondrial OS=Homo sapiens OX=9606 GN=MDH2 PE=1 SV=3	P40926	0.9	0.9	0.9	0.9	0.9	0.9	1
Lamina-associated polypeptide 2, isoforms beta/gamma OS=Homo sapiens OX=9606 GN=TMPO PE=1 SV=2	P42167	0.9	1	1	0.909091	0.95	0.947368	1
Leucine-rich PPR motif-containing protein, mitochondrial OS=Homo sapiens OX=9606 GN=LRPPRC PE=1 SV=3	P42704	0.9	0.9	0.9	0.9	0.9	0.9	1
Ran-specific GTPase-activating protein OS=Homo sapiens OX=9606 GN=RANBP1 PE=1 SV=1	P43487	0.9	1	1	0.909091	0.95	0.947368	1
60S ribosomal protein L21 OS=Homo sapiens OX=9606 GN=RPL21 PE=1 SV=2	P46778	0.7	1	1	0.769231	0.85	0.823529	1
ATP synthase subunit O, mitochondrial OS=Homo sapiens OX=9606 GN=ATP5PO PE=1 SV=1	P48047	0.8	1	1	0.833333	0.9	0.888889	1
Glutathione synthetase OS=Homo sapiens OX=9606 GN=GSS PE=1 SV=1	P48637	1	1	1	1	1	1	1
T-complex protein 1 subunit gamma OS=Homo sapiens OX=9606 GN=CCT3 PE=1 SV=4	P49368	1	1	1	1	1	1	1
Elongation factor Tu, mitochondrial OS=Homo sapiens OX=9606 GN=TUFM PE=1 SV=2	P49411	0.9	1	1	0.909091	0.95	0.947368	1
Alpha-aminoadipic semialdehyde dehydrogenase OS=Homo sapiens OX=9606 GN=ALDH7A1 PE=1 SV=5	P49419	0.9	1	1	0.909091	0.95	0.947368	1
Choline-phosphate cytidylyltransferase A OS=Homo sapiens OX=9606 GN=PCYT1A PE=1 SV=2	P49585	0.9	1	1	0.909091	0.95	0.947368	1
DNA replication licensing factor MCM2 OS=Homo sapiens OX=9606 GN=MCM2 PE=1 SV=4	P49736	1	1	1	1	1	1	1
Dynamin-2 OS=Homo sapiens OX=9606 GN=DNM2 PE=1 SV=2	P50570	0.9	1	1	0.909091	0.95	0.947368	1
Methionine aminopeptidase 2 OS=Homo sapiens OX=9606 GN=METAP2 PE=1 SV=1	P50579	0.9	0.9	0.9	0.9	0.9	0.9	1
Palmitoyl-protein thioesterase 1 OS=Homo sapiens OX=9606 GN=PPT1 PE=1 SV=1	P50897	0.9	1	1	0.909091	0.95	0.947368	1
T-complex protein 1 subunit theta OS=Homo sapiens OX=9606 GN=CCT8 PE=1 SV=4	P50990	1	0.9	0.909091	1	0.95	0.952381	1
T-complex protein 1 subunit delta OS=Homo sapiens OX=9606 GN=CCT4 PE=1 SV=4	P50991	1	1	1	1	1	1	1
Annexin A11 OS=Homo sapiens OX=9606 GN=ANXA11 PE=1 SV=1	P50995	1	0.9	0.909091	1	0.95	0.952381	1
28S ribosomal protein S29, mitochondrial OS=Homo sapiens OX=9606 GN=DAP3 PE=1 SV=1	P51398	0.9	1	1	0.909091	0.95	0.947368	1
Peroxisomal multifunctional enzyme type 2 OS=Homo sapiens OX=9606 GN=HSD17B4 PE=1 SV=3	P51659	0.8	1	1	0.833333	0.9	0.888889	1
Heterogeneous nuclear ribonucleoprotein F OS=Homo sapiens OX=9606 GN=HNRNPF PE=1 SV=3	P52597	1	0.9	0.909091	1	0.95	0.952381	1
Spermine synthase OS=Homo sapiens OX=9606 GN=SMS PE=1 SV=2	P52788	1	0.9	0.909091	1	0.95	0.952381	1
39S ribosomal protein L12, mitochondrial OS=Homo sapiens OX=9606 GN=MRPL12 PE=1 SV=2	P52815	0.9	1	1	0.909091	0.95	0.947368	1
Serine/threonine-protein phosphatase 5 OS=Homo sapiens OX=9606 GN=PPP5C PE=1 SV=1	P53041	0.9	0.9	0.9	0.9	0.9	0.9	1
Delta-1-pyrroline-5-carboxylate synthase OS=Homo sapiens OX=9606 GN=ALDH18A1 PE=1 SV=2	P54886	0.9	0.9	0.9	0.9	0.9	0.9	1
Eukaryotic translation initiation factor 3 subunit B OS=Homo sapiens OX=9606 GN=EIF3B PE=1 SV=3	P55884	1	1	1	1	1	1	1
Eukaryotic translation initiation factor 6 OS=Homo sapiens OX=9606 GN=EIF6 PE=1 SV=1	P56537	1	1	1	1	1	1	1
Poly(rC)-binding protein 3 OS=Homo sapiens OX=9606 GN=PCBP3 PE=2 SV=2	P57721	0.8	1	1	0.833333	0.9	0.888889	1
Proteasome subunit alpha type-6 OS=Homo sapiens OX=9606 GN=PSMA6 PE=1 SV=1	P60900	0.9	1	1	0.909091	0.95	0.947368	1
Ras-related protein Rab-2A OS=Homo sapiens OX=9606 GN=RAB2A PE=1 SV=1	P61019	1	1	1	1	1	1	1
10 kDa heat shock protein, mitochondrial OS=Homo sapiens OX=9606 GN=HSPE1 PE=1 SV=2	P61604	0.9	1	1	0.909091	0.95	0.947368	1
Heterogeneous nuclear ribonucleoprotein K OS=Homo sapiens OX=9606 GN=HNRNPK PE=1 SV=1	P61978	0.9	1	1	0.909091	0.95	0.947368	1
Small nuclear ribonucleoprotein Sm D2 OS=Homo sapiens OX=9606 GN=SNRPD2 PE=1 SV=1	P62316	0.9	1	1	0.909091	0.95	0.947368	1
Eukaryotic peptide chain release factor subunit 1 OS=Homo sapiens OX=9606 GN=ETF1 PE=1 SV=3	P62495	0.8	1	1	0.833333	0.9	0.888889	1
Visinin-like protein 1 OS=Homo sapiens OX=9606 GN=VSNL1 PE=1 SV=2	P62760	0.8	1	1	0.833333	0.9	0.888889	1
GTP-binding nuclear protein Ran OS=Homo sapiens OX=9606 GN=RAN PE=1 SV=3	P62826	0.8	1	1	0.833333	0.9	0.888889	1
60S ribosomal protein L23 OS=Homo sapiens OX=9606 GN=RPL23 PE=1 SV=1	P62829	0.8	1	1	0.833333	0.9	0.888889	1
Peptidyl-prolyl cis-trans isomerase A OS=Homo sapiens OX=9606 GN=PPIA PE=1 SV=2	P62937	0.9	0.9	0.9	0.9	0.9	0.9	1
Nuclease-sensitive element-binding protein 1 OS=Homo sapiens OX=9606 GN=YBX1 PE=1 SV=3	P67809	0.8	1	1	0.833333	0.9	0.888889	1
Casein kinase II subunit beta OS=Homo sapiens OX=9606 GN=CSNK2B PE=1 SV=1	P67870	0.8	1	1	0.833333	0.9	0.888889	1
Ubiquitin-conjugating enzyme E2 L3 OS=Homo sapiens OX=9606 GN=UBE2L3 PE=1 SV=1	P68036	1	0.7	0.769231	1	0.85	0.869565	1
Sorbitol dehydrogenase OS=Homo sapiens OX=9606 GN=SORD PE=1 SV=4	Q00796	0.9	1	1	0.909091	0.95	0.947368	1
Heterogeneous nuclear ribonucleoprotein U OS=Homo sapiens OX=9606 GN=HNRNPU PE=1 SV=6	Q00839	0.9	1	1	0.909091	0.95	0.947368	1
Splicing factor U2AF 35 kDa subunit OS=Homo sapiens OX=9606 GN=U2AF1 PE=1 SV=3	Q01081	0.9	1	1	0.909091	0.95	0.947368	1
RNA-binding protein EWS OS=Homo sapiens OX=9606 GN=EWSR1 PE=1 SV=1	Q01844	1	0.9	0.909091	1	0.95	0.952381	1
D-beta-hydroxybutyrate dehydrogenase, mitochondrial OS=Homo sapiens OX=9606 GN=BDH1 PE=1 SV=3	Q02338	1	1	1	1	1	1	1
Complement component 1 Q subcomponent-binding protein, mitochondrial OS=Homo sapiens OX=9606 GN=C1QBP PE=1 SV=1	Q07021	0.9	1	1	0.909091	0.95	0.947368	1
Serine/arginine-rich splicing factor 1 OS=Homo sapiens OX=9606 GN=SRSF1 PE=1 SV=2	Q07955	1	1	1	1	1	1	1
ATP-dependent RNA helicase A OS=Homo sapiens OX=9606 GN=DHX9 PE=1 SV=4	Q08211	0.9	0.9	0.9	0.9	0.9	0.9	1
Golgin subfamily A member 2 OS=Homo sapiens OX=9606 GN=GOLGA2 PE=1 SV=3	Q08379	0.9	1	1	0.909091	0.95	0.947368	1
FACT complex subunit SSRP1 OS=Homo sapiens OX=9606 GN=SSRP1 PE=1 SV=1	Q08945	0.9	0.9	0.9	0.9	0.9	0.9	1
Mitochondrial-processing peptidase subunit alpha OS=Homo sapiens OX=9606 GN=PMPCA PE=1 SV=2	Q10713	1	0.9	0.909091	1	0.95	0.952381	1
Twinfilin-1 OS=Homo sapiens OX=9606 GN=TWF1 PE=1 SV=3	Q12792	1	0.9	0.909091	1	0.95	0.952381	1
Heterogeneous nuclear ribonucleoprotein A0 OS=Homo sapiens OX=9606 GN=HNRNPA0 PE=1 SV=1	Q13151	1	1	1	1	1	1	1
Chromobox protein homolog 3 OS=Homo sapiens OX=9606 GN=CBX3 PE=1 SV=4	Q13185	0.9	0.9	0.9	0.9	0.9	0.9	1
Ras GTPase-activating protein-binding protein 1 OS=Homo sapiens OX=9606 GN=G3BP1 PE=1 SV=1	Q13283	0.9	1	1	0.909091	0.95	0.947368	1
Histone deacetylase 1 OS=Homo sapiens OX=9606 GN=HDAC1 PE=1 SV=1	Q13547	0.8	1	1	0.833333	0.9	0.888889	1
GDP-L-fucose synthase OS=Homo sapiens OX=9606 GN=TSTA3 PE=1 SV=1	Q13630	0.9	1	1	0.909091	0.95	0.947368	1
Spliceosome RNA helicase DDX39B OS=Homo sapiens OX=9606 GN=DDX39B PE=1 SV=1	Q13838	0.8	1	1	0.833333	0.9	0.888889	1
Tubulin beta-2A chain OS=Homo sapiens OX=9606 GN=TUBB2A PE=1 SV=1	Q13885	0.8	1	1	0.833333	0.9	0.888889	1
Heterogeneous nuclear ribonucleoprotein D0 OS=Homo sapiens OX=9606 GN=HNRNPD PE=1 SV=1	Q14103	0.9	1	1	0.909091	0.95	0.947368	1
Nidogen-2 OS=Homo sapiens OX=9606 GN=NID2 PE=1 SV=3	Q14112	1	0.9	0.909091	1	0.95	0.952381	1
Tubulin--tyrosine ligase-like protein 12 OS=Homo sapiens OX=9606 GN=TTLL12 PE=1 SV=2	Q14166	0.9	1	1	0.909091	0.95	0.947368	1
Src substrate cortactin OS=Homo sapiens OX=9606 GN=CTTN PE=1 SV=2	Q14247	1	0.8	0.833333	1	0.9	0.909091	1
E3 ubiquitin/ISG15 ligase TRIM25 OS=Homo sapiens OX=9606 GN=TRIM25 PE=1 SV=2	Q14258	0.9	0.9	0.9	0.9	0.9	0.9	1
UDP-glucose 4-epimerase OS=Homo sapiens OX=9606 GN=GALE PE=1 SV=2	Q14376	1	1	1	1	1	1	1
RNA-binding protein 39 OS=Homo sapiens OX=9606 GN=RBM39 PE=1 SV=2	Q14498	0.9	1	1	0.909091	0.95	0.947368	1
Chromodomain-helicase-DNA-binding protein 4 OS=Homo sapiens OX=9606 GN=CHD4 PE=1 SV=2	Q14839	0.9	1	1	0.909091	0.95	0.947368	1
26S proteasome non-ATPase regulatory subunit 6 OS=Homo sapiens OX=9606 GN=PSMD6 PE=1 SV=1	Q15008	0.8	0.9	0.888889	0.818182	0.85	0.842105	1
Eukaryotic translation initiation factor 4H OS=Homo sapiens OX=9606 GN=EIF4H PE=1 SV=5	Q15056	1	1	1	1	1	1	1
RNA-binding protein with serine-rich domain 1 OS=Homo sapiens OX=9606 GN=RNPS1 PE=1 SV=1	Q15287	1	0.8	0.833333	1	0.9	0.909091	1
Splicing factor 3B subunit 3 OS=Homo sapiens OX=9606 GN=SF3B3 PE=1 SV=4	Q15393	0.8	1	1	0.833333	0.9	0.888889	1
Translin OS=Homo sapiens OX=9606 GN=TSN PE=1 SV=1	Q15631	0.9	1	1	0.909091	0.95	0.947368	1
Hydroxyacyl-coenzyme A dehydrogenase, mitochondrial OS=Homo sapiens OX=9606 GN=HADH PE=1 SV=3	Q16836	1	0.9	0.909091	1	0.95	0.952381	1
Programmed cell death protein 4 OS=Homo sapiens OX=9606 GN=PDCD4 PE=1 SV=2	Q53EL6	1	1	1	1	1	1	1
Presequence protease, mitochondrial OS=Homo sapiens OX=9606 GN=PITRM1 PE=1 SV=3	Q5JRX3	0.9	1	1	0.909091	0.95	0.947368	1
Cytochrome c oxidase assembly factor 6 homolog OS=Homo sapiens OX=9606 GN=COA6 PE=1 SV=1	Q5JTJ3	0.9	1	1	0.909091	0.95	0.947368	1
Tetratricopeptide repeat protein 38 OS=Homo sapiens OX=9606 GN=TTC38 PE=1 SV=1	Q5R3I4	0.9	1	1	0.909091	0.95	0.947368	1
Calcium-binding mitochondrial carrier protein SCaMC-1 OS=Homo sapiens OX=9606 GN=SLC25A24 PE=1 SV=2	Q6NUK1	0.8	0.9	0.888889	0.818182	0.85	0.842105	1
Putative deoxyribonuclease TATDN1 OS=Homo sapiens OX=9606 GN=TATDN1 PE=1 SV=2	Q6P1N9	0.9	0.9	0.9	0.9	0.9	0.9	1
Enhancer of mRNA-decapping protein 4 OS=Homo sapiens OX=9606 GN=EDC4 PE=1 SV=1	Q6P2E9	0.8	1	1	0.833333	0.9	0.888889	1
Neutral cholesterol ester hydrolase 1 OS=Homo sapiens OX=9606 GN=NCEH1 PE=1 SV=3	Q6PIU2	1	1	1	1	1	1	1
Probable ATP-dependent RNA helicase DDX46 OS=Homo sapiens OX=9606 GN=DDX46 PE=1 SV=2	Q7L014	0.8	1	1	0.833333	0.9	0.888889	1
tRNA methyltransferase 10 homolog C OS=Homo sapiens OX=9606 GN=TRMT10C PE=1 SV=2	Q7L0Y3	0.9	0.9	0.9	0.9	0.9	0.9	1
L-xylulose reductase OS=Homo sapiens OX=9606 GN=DCXR PE=1 SV=2	Q7Z4W1	1	0.9	0.909091	1	0.95	0.952381	1
Cullin-associated NEDD8-dissociated protein 1 OS=Homo sapiens OX=9606 GN=CAND1 PE=1 SV=2	Q86VP6	1	1	1	1	1	1	1
Ribonucleoprotein PTB-binding 1 OS=Homo sapiens OX=9606 GN=RAVER1 PE=1 SV=1	Q8IY67	0.9	1	1	0.909091	0.95	0.947368	1
Plasminogen activator inhibitor 1 RNA-binding protein OS=Homo sapiens OX=9606 GN=SERBP1 PE=1 SV=2	Q8NC51	1	1	1	1	1	1	1
Calcium uniporter protein, mitochondrial OS=Homo sapiens OX=9606 GN=MCU PE=1 SV=1	Q8NE86	1	1	1	1	1	1	1
Protein ABHD11 OS=Homo sapiens OX=9606 GN=ABHD11 PE=1 SV=1	Q8NFV4	0.9	1	1	0.909091	0.95	0.947368	1
N-acylneuraminate cytidylyltransferase OS=Homo sapiens OX=9606 GN=CMAS PE=1 SV=2	Q8NFW8	1	1	1	1	1	1	1
Polyribonucleotide nucleotidyltransferase 1, mitochondrial OS=Homo sapiens OX=9606 GN=PNPT1 PE=1 SV=2	Q8TCS8	0.8	1	1	0.833333	0.9	0.888889	1
Programmed cell death 6-interacting protein OS=Homo sapiens OX=9606 GN=PDCD6IP PE=1 SV=1	Q8WUM4	0.9	1	1	0.909091	0.95	0.947368	1
Paraspeckle component 1 OS=Homo sapiens OX=9606 GN=PSPC1 PE=1 SV=1	Q8WXF1	1	1	1	1	1	1	1
Nuclear pore complex protein Nup205 OS=Homo sapiens OX=9606 GN=NUP205 PE=1 SV=3	Q92621	0.9	0.9	0.9	0.9	0.9	0.9	1
TATA-binding protein-associated factor 2N OS=Homo sapiens OX=9606 GN=TAF15 PE=1 SV=1	Q92804	1	1	1	1	1	1	1
Far upstream element-binding protein 2 OS=Homo sapiens OX=9606 GN=KHSRP PE=1 SV=4	Q92945	1	1	1	1	1	1	1
Protein FAM162A OS=Homo sapiens OX=9606 GN=FAM162A PE=1 SV=2	Q96A26	0.7	0.9	0.875	0.75	0.8	0.777778	1
U8 snoRNA-decapping enzyme OS=Homo sapiens OX=9606 GN=NUDT16 PE=1 SV=2	Q96DE0	0.8	1	1	0.833333	0.9	0.888889	1
Glucosamine 6-phosphate N-acetyltransferase OS=Homo sapiens OX=9606 GN=GNPNAT1 PE=1 SV=1	Q96EK6	0.8	1	1	0.833333	0.9	0.888889	1
Protein ABHD14B OS=Homo sapiens OX=9606 GN=ABHD14B PE=1 SV=1	Q96IU4	0.8	0.9	0.888889	0.818182	0.85	0.842105	1
Methylcrotonoyl-CoA carboxylase subunit alpha, mitochondrial OS=Homo sapiens OX=9606 GN=MCCC1 PE=1 SV=3	Q96RQ3	0.8	1	1	0.833333	0.9	0.888889	1
Cytochrome P450 2S1 OS=Homo sapiens OX=9606 GN=CYP2S1 PE=1 SV=2	Q96SQ9	0.9	1	1	0.909091	0.95	0.947368	1
26S proteasome non-ATPase regulatory subunit 1 OS=Homo sapiens OX=9606 GN=PSMD1 PE=1 SV=2	Q99460	0.9	1	1	0.909091	0.95	0.947368	1
Prohibitin-2 OS=Homo sapiens OX=9606 GN=PHB2 PE=1 SV=2	Q99623	0.8	1	1	0.833333	0.9	0.888889	1
Protein NipSnap homolog 1 OS=Homo sapiens OX=9606 GN=NIPSNAP1 PE=1 SV=1	Q9BPW8	0.9	1	1	0.909091	0.95	0.947368	1
Agmatinase, mitochondrial OS=Homo sapiens OX=9606 GN=AGMAT PE=1 SV=2	Q9BSE5	1	0.9	0.909091	1	0.95	0.952381	1
Protein PAXX OS=Homo sapiens OX=9606 GN=PAXX PE=1 SV=2	Q9BUH6	0.9	0.9	0.9	0.9	0.9	0.9	1
Programmed cell death protein 10 OS=Homo sapiens OX=9606 GN=PDCD10 PE=1 SV=1	Q9BUL8	0.9	1	1	0.909091	0.95	0.947368	1
Serrate RNA effector molecule homolog OS=Homo sapiens OX=9606 GN=SRRT PE=1 SV=1	Q9BXP5	1	1	1	1	1	1	1
Eukaryotic translation initiation factor 2A OS=Homo sapiens OX=9606 GN=EIF2A PE=1 SV=3	Q9BY44	0.9	0.8	0.818182	0.888889	0.85	0.857143	1
Apoptosis inhibitor 5 OS=Homo sapiens OX=9606 GN=API5 PE=1 SV=3	Q9BZZ5	0.9	1	1	0.909091	0.95	0.947368	1
SRA stem-loop-interacting RNA-binding protein, mitochondrial OS=Homo sapiens OX=9606 GN=SLIRP PE=1 SV=1	Q9GZT3	1	1	1	1	1	1	1
Pinin OS=Homo sapiens OX=9606 GN=PNN PE=1 SV=5	Q9H307	0.9	1	1	0.909091	0.95	0.947368	1
Growth hormone-inducible transmembrane protein OS=Homo sapiens OX=9606 GN=GHITM PE=1 SV=2	Q9H3K2	0.9	1	1	0.909091	0.95	0.947368	1
Mucin-13 OS=Homo sapiens OX=9606 GN=MUC13 PE=1 SV=3	Q9H3R2	1	1	1	1	1	1	1
dCTP pyrophosphatase 1 OS=Homo sapiens OX=9606 GN=DCTPP1 PE=1 SV=1	Q9H773	1	1	1	1	1	1	1
Phosphopantothenate--cysteine ligase OS=Homo sapiens OX=9606 GN=PPCS PE=1 SV=2	Q9HAB8	1	1	1	1	1	1	1
GrpE protein homolog 1, mitochondrial OS=Homo sapiens OX=9606 GN=GRPEL1 PE=1 SV=2	Q9HAV7	1	1	1	1	1	1	1
Omega-amidase NIT2 OS=Homo sapiens OX=9606 GN=NIT2 PE=1 SV=1	Q9NQR4	1	1	1	1	1	1	1
Mitochondrial import receptor subunit TOM22 homolog OS=Homo sapiens OX=9606 GN=TOMM22 PE=1 SV=3	Q9NS69	0.9	1	1	0.909091	0.95	0.947368	1
Phenylalanine--tRNA ligase beta subunit OS=Homo sapiens OX=9606 GN=FARSB PE=1 SV=3	Q9NSD9	0.9	1	1	0.909091	0.95	0.947368	1
ATPase family AAA domain-containing protein 3A OS=Homo sapiens OX=9606 GN=ATAD3A PE=1 SV=2	Q9NVI7	0.9	1	1	0.909091	0.95	0.947368	1
ATP-dependent RNA helicase DDX18 OS=Homo sapiens OX=9606 GN=DDX18 PE=1 SV=2	Q9NVP1	0.8	1	1	0.833333	0.9	0.888889	1
Methionine adenosyltransferase 2 subunit beta OS=Homo sapiens OX=9606 GN=MAT2B PE=1 SV=1	Q9NZL9	0.9	1	1	0.909091	0.95	0.947368	1
Thymocyte nuclear protein 1 OS=Homo sapiens OX=9606 GN=THYN1 PE=1 SV=1	Q9P016	1	1	1	1	1	1	1
Protein RCC2 OS=Homo sapiens OX=9606 GN=RCC2 PE=1 SV=2	Q9P258	1	1	1	1	1	1	1
Prostaglandin F2 receptor negative regulator OS=Homo sapiens OX=9606 GN=PTGFRN PE=1 SV=2	Q9P2B2	0.9	0.9	0.9	0.9	0.9	0.9	1
Vacuolar protein sorting-associated protein 29 OS=Homo sapiens OX=9606 GN=VPS29 PE=1 SV=1	Q9UBQ0	0.8	1	1	0.833333	0.9	0.888889	1
Mitochondrial dicarboxylate carrier OS=Homo sapiens OX=9606 GN=SLC25A10 PE=1 SV=2	Q9UBX3	0.9	0.9	0.9	0.9	0.9	0.9	1
Protein phosphatase 1 regulatory subunit 1B OS=Homo sapiens OX=9606 GN=PPP1R1B PE=1 SV=2	Q9UD71	1	1	1	1	1	1	1
Tight junction protein ZO-2 OS=Homo sapiens OX=9606 GN=TJP2 PE=1 SV=2	Q9UDY2	1	0.9	0.909091	1	0.95	0.952381	1
Stomatin-like protein 2, mitochondrial OS=Homo sapiens OX=9606 GN=STOML2 PE=1 SV=1	Q9UJZ1	1	1	1	1	1	1	1
Jupiter microtubule associated homolog 1 OS=Homo sapiens OX=9606 GN=JPT1 PE=1 SV=3	Q9UK76	1	0.9	0.909091	1	0.95	0.952381	1
Structural maintenance of chromosomes protein 3 OS=Homo sapiens OX=9606 GN=SMC3 PE=1 SV=2	Q9UQE7	0.9	1	1	0.909091	0.95	0.947368	1
Glutathione S-transferase kappa 1 OS=Homo sapiens OX=9606 GN=GSTK1 PE=1 SV=3	Q9Y2Q3	0.8	1	1	0.833333	0.9	0.888889	1
START domain-containing protein 10 OS=Homo sapiens OX=9606 GN=STARD10 PE=1 SV=2	Q9Y365	0.9	1	1	0.909091	0.95	0.947368	1
U6 snRNA-associated Sm-like protein LSm4 OS=Homo sapiens OX=9606 GN=LSM4 PE=1 SV=1	Q9Y4Z0	0.9	1	1	0.909091	0.95	0.947368	1
E3 ubiquitin-protein ligase RNF114 OS=Homo sapiens OX=9606 GN=RNF114 PE=1 SV=1	Q9Y508	0.9	0.9	0.9	0.9	0.9	0.9	1
Sorting and assembly machinery component 50 homolog OS=Homo sapiens OX=9606 GN=SAMM50 PE=1 SV=3	Q9Y512	0.7	1	1	0.769231	0.85	0.823529	1
Serine/threonine-protein kinase 24 OS=Homo sapiens OX=9606 GN=STK24 PE=1 SV=1	Q9Y6E0	0.9	1	1	0.909091	0.95	0.947368	1
Basic leucine zipper and W2 domain-containing protein 2 OS=Homo sapiens OX=9606 GN=BZW2 PE=1 SV=1	Q9Y6E2	1	1	1	1	1	1	1
Coiled-coil-helix-coiled-coil-helix domain-containing protein 2 OS=Homo sapiens OX=9606 GN=CHCHD2 PE=1 SV=1	Q9Y6H1	0.9	1	1	0.909091	0.95	0.947368	1
Nucleolar protein 56 OS=Homo sapiens OX=9606 GN=NOP56 PE=1 SV=4	O00567	0.9	0.9	0.9	0.9	0.9	0.9	0.99
Ribonuclease T2 OS=Homo sapiens OX=9606 GN=RNASET2 PE=1 SV=2	O00584	0.8	1	1	0.833333	0.9	0.888889	0.99
Acyl carrier protein, mitochondrial OS=Homo sapiens OX=9606 GN=NDUFAB1 PE=1 SV=3	O14561	0.9	0.9	0.9	0.9	0.9	0.9	0.99
Proteasome subunit alpha type-7 OS=Homo sapiens OX=9606 GN=PSMA7 PE=1 SV=1	O14818	0.9	0.9	0.9	0.9	0.9	0.9	0.99
Prefoldin subunit 6 OS=Homo sapiens OX=9606 GN=PFDN6 PE=1 SV=1	O15212	1	0.9	0.909091	1	0.95	0.952381	0.99
Heterogeneous nuclear ribonucleoprotein R OS=Homo sapiens OX=9606 GN=HNRNPR PE=1 SV=1	O43390	0.9	0.9	0.9	0.9	0.9	0.9	0.99
Programmed cell death protein 6 OS=Homo sapiens OX=9606 GN=PDCD6 PE=1 SV=1	O75340	0.9	0.9	0.9	0.9	0.9	0.9	0.99
Tubulin-specific chaperone A OS=Homo sapiens OX=9606 GN=TBCA PE=1 SV=3	O75347	0.9	0.9	0.9	0.9	0.9	0.9	0.99
Filamin-B OS=Homo sapiens OX=9606 GN=FLNB PE=1 SV=2	O75369	0.9	0.9	0.9	0.9	0.9	0.9	0.99
PRA1 family protein 3 OS=Homo sapiens OX=9606 GN=ARL6IP5 PE=1 SV=1	O75915	1	0.6	0.714286	1	0.8	0.833333	0.99
Ribosomal L1 domain-containing protein 1 OS=Homo sapiens OX=9606 GN=RSL1D1 PE=1 SV=3	O76021	0.9	0.9	0.9	0.9	0.9	0.9	0.99
Erlin-2 OS=Homo sapiens OX=9606 GN=ERLIN2 PE=1 SV=1	O94905	1	0.9	0.909091	1	0.95	0.952381	0.99
Long-chain-fatty-acid--CoA ligase 3 OS=Homo sapiens OX=9606 GN=ACSL3 PE=1 SV=3	O95573	0.8	1	1	0.833333	0.9	0.888889	0.99
Amyloid-beta precursor protein OS=Homo sapiens OX=9606 GN=APP PE=1 SV=3	P05067	0.8	0.9	0.888889	0.818182	0.85	0.842105	0.99
Adenine phosphoribosyltransferase OS=Homo sapiens OX=9606 GN=APRT PE=1 SV=2	P07741	0.9	0.9	0.9	0.9	0.9	0.9	0.99
Heterogeneous nuclear ribonucleoproteins C1/C2 OS=Homo sapiens OX=9606 GN=HNRNPC PE=1 SV=4	P07910	0.8	0.9	0.888889	0.818182	0.85	0.842105	0.99
Cytochrome c1, heme protein, mitochondrial OS=Homo sapiens OX=9606 GN=CYC1 PE=1 SV=3	P08574	1	0.9	0.909091	1	0.95	0.952381	0.99
Heat shock cognate 71 kDa protein OS=Homo sapiens OX=9606 GN=HSPA8 PE=1 SV=1	P11142	0.9	0.9	0.9	0.9	0.9	0.9	0.99
Polyadenylate-binding protein 1 OS=Homo sapiens OX=9606 GN=PABPC1 PE=1 SV=2	P11940	0.9	1	1	0.909091	0.95	0.947368	0.99
Stathmin OS=Homo sapiens OX=9606 GN=STMN1 PE=1 SV=3	P16949	0.9	0.9	0.9	0.9	0.9	0.9	0.99
Tetraspanin-8 OS=Homo sapiens OX=9606 GN=TSPAN8 PE=1 SV=1	P19075	0.9	0.9	0.9	0.9	0.9	0.9	0.99
Catechol O-methyltransferase OS=Homo sapiens OX=9606 GN=COMT PE=1 SV=2	P21964	0.9	0.8	0.818182	0.888889	0.85	0.857143	0.99
Polypyrimidine tract-binding protein 1 OS=Homo sapiens OX=9606 GN=PTBP1 PE=1 SV=1	P26599	0.9	1	1	0.909091	0.95	0.947368	0.99
UMP-CMP kinase OS=Homo sapiens OX=9606 GN=CMPK1 PE=1 SV=3	P30085	0.9	0.9	0.9	0.9	0.9	0.9	0.99
3-hydroxyisobutyrate dehydrogenase, mitochondrial OS=Homo sapiens OX=9606 GN=HIBADH PE=1 SV=2	P31937	0.9	0.8	0.818182	0.888889	0.85	0.857143	0.99
Heterogeneous nuclear ribonucleoprotein H3 OS=Homo sapiens OX=9606 GN=HNRNPH3 PE=1 SV=2	P31942	0.7	1	1	0.769231	0.85	0.823529	0.99
14-3-3 protein beta/alpha OS=Homo sapiens OX=9606 GN=YWHAB PE=1 SV=3	P31946	0.9	0.8	0.818182	0.888889	0.85	0.857143	0.99
Heat shock 70 kDa protein 4 OS=Homo sapiens OX=9606 GN=HSPA4 PE=1 SV=4	P34932	0.9	0.9	0.9	0.9	0.9	0.9	0.99
Protein phosphatase 1A OS=Homo sapiens OX=9606 GN=PPM1A PE=1 SV=1	P35813	0.6	1	1	0.714286	0.8	0.75	0.99
ADP-ribosylation factor-like protein 3 OS=Homo sapiens OX=9606 GN=ARL3 PE=1 SV=2	P36405	0.8	0.9	0.888889	0.818182	0.85	0.842105	0.99
Glycine--tRNA ligase OS=Homo sapiens OX=9606 GN=GARS PE=1 SV=3	P41250	0.9	1	1	0.909091	0.95	0.947368	0.99
T-complex protein 1 subunit epsilon OS=Homo sapiens OX=9606 GN=CCT5 PE=1 SV=1	P48643	0.9	0.8	0.818182	0.888889	0.85	0.857143	0.99
NADH dehydrogenase [ubiquinone] 1 alpha subcomplex subunit 8 OS=Homo sapiens OX=9606 GN=NDUFA8 PE=1 SV=3	P51970	0.8	0.9	0.888889	0.818182	0.85	0.842105	0.99
DNA-directed RNA polymerases I, II, and III subunit RPABC3 OS=Homo sapiens OX=9606 GN=POLR2H PE=1 SV=4	P52434	0.9	0.9	0.9	0.9	0.9	0.9	0.99
Hexokinase-2 OS=Homo sapiens OX=9606 GN=HK2 PE=1 SV=2	P52789	0.9	1	1	0.909091	0.95	0.947368	0.99
Caspase-6 OS=Homo sapiens OX=9606 GN=CASP6 PE=1 SV=2	P55212	0.9	0.9	0.9	0.9	0.9	0.9	0.99
Ras-related protein Rab-5B OS=Homo sapiens OX=9606 GN=RAB5B PE=1 SV=1	P61020	0.8	0.9	0.888889	0.818182	0.85	0.842105	0.99
Alpha-centractin OS=Homo sapiens OX=9606 GN=ACTR1A PE=1 SV=1	P61163	0.8	0.9	0.888889	0.818182	0.85	0.842105	0.99
Proteasome activator complex subunit 3 OS=Homo sapiens OX=9606 GN=PSME3 PE=1 SV=1	P61289	0.9	0.9	0.9	0.9	0.9	0.9	0.99
Protein mago nashi homolog OS=Homo sapiens OX=9606 GN=MAGOH PE=1 SV=1	P61326	0.8	0.9	0.888889	0.818182	0.85	0.842105	0.99
Small nuclear ribonucleoprotein Sm D1 OS=Homo sapiens OX=9606 GN=SNRPD1 PE=1 SV=1	P62314	0.9	0.9	0.9	0.9	0.9	0.9	0.99
40S ribosomal protein S25 OS=Homo sapiens OX=9606 GN=RPS25 PE=1 SV=1	P62851	0.9	0.9	0.9	0.9	0.9	0.9	0.99
Transformer-2 protein homolog beta OS=Homo sapiens OX=9606 GN=TRA2B PE=1 SV=1	P62995	0.8	1	1	0.833333	0.9	0.888889	0.99
General transcription factor II-I OS=Homo sapiens OX=9606 GN=GTF2I PE=1 SV=2	P78347	0.9	0.9	0.9	0.9	0.9	0.9	0.99
T-complex protein 1 subunit beta OS=Homo sapiens OX=9606 GN=CCT2 PE=1 SV=4	P78371	0.9	0.9	0.9	0.9	0.9	0.9	0.99
DNA-dependent protein kinase catalytic subunit OS=Homo sapiens OX=9606 GN=PRKDC PE=1 SV=3	P78527	0.9	0.9	0.9	0.9	0.9	0.9	0.99
28S ribosomal protein S35, mitochondrial OS=Homo sapiens OX=9606 GN=MRPS35 PE=1 SV=1	P82673	0.9	1	1	0.909091	0.95	0.947368	0.99
Serine/arginine-rich splicing factor 3 OS=Homo sapiens OX=9606 GN=SRSF3 PE=1 SV=1	P84103	0.9	0.9	0.9	0.9	0.9	0.9	0.99
Cytochrome c OS=Homo sapiens OX=9606 GN=CYCS PE=1 SV=2	P99999	1	0.9	0.909091	1	0.95	0.952381	0.99
Phosphate carrier protein, mitochondrial OS=Homo sapiens OX=9606 GN=SLC25A3 PE=1 SV=2	Q00325	0.9	0.8	0.818182	0.888889	0.85	0.857143	0.99
Peptidyl-prolyl cis-trans isomerase FKBP3 OS=Homo sapiens OX=9606 GN=FKBP3 PE=1 SV=1	Q00688	0.9	0.9	0.9	0.9	0.9	0.9	0.99
Spectrin beta chain, non-erythrocytic 1 OS=Homo sapiens OX=9606 GN=SPTBN1 PE=1 SV=2	Q01082	0.9	0.9	0.9	0.9	0.9	0.9	0.99
Serine/arginine-rich splicing factor 11 OS=Homo sapiens OX=9606 GN=SRSF11 PE=1 SV=1	Q05519	0.9	0.9	0.9	0.9	0.9	0.9	0.99
Glutamine--fructose-6-phosphate aminotransferase [isomerizing] 1 OS=Homo sapiens OX=9606 GN=GFPT1 PE=1 SV=3	Q06210	0.9	0.9	0.9	0.9	0.9	0.9	0.99
KH domain-containing, RNA-binding, signal transduction-associated protein 1 OS=Homo sapiens OX=9606 GN=KHDRBS1 PE=1 SV=1	Q07666	0.9	0.9	0.9	0.9	0.9	0.9	0.99
Nuclear cap-binding protein subunit 1 OS=Homo sapiens OX=9606 GN=NCBP1 PE=1 SV=1	Q09161	0.9	0.9	0.9	0.9	0.9	0.9	0.99
Interleukin enhancer-binding factor 2 OS=Homo sapiens OX=9606 GN=ILF2 PE=1 SV=2	Q12905	0.9	1	1	0.909091	0.95	0.947368	0.99
Serine/arginine-rich splicing factor 6 OS=Homo sapiens OX=9606 GN=SRSF6 PE=1 SV=2	Q13247	0.9	0.9	0.9	0.9	0.9	0.9	0.99
Poly(rC)-binding protein 1 OS=Homo sapiens OX=9606 GN=PCBP1 PE=1 SV=2	Q15365	0.8	0.9	0.888889	0.818182	0.85	0.842105	0.99
Scaffold attachment factor B1 OS=Homo sapiens OX=9606 GN=SAFB PE=1 SV=4	Q15424	0.9	0.9	0.9	0.9	0.9	0.9	0.99
Microtubule-associated protein RP/EB family member 1 OS=Homo sapiens OX=9606 GN=MAPRE1 PE=1 SV=3	Q15691	0.9	0.8	0.818182	0.888889	0.85	0.857143	0.99
Phosphoenolpyruvate carboxykinase [GTP], mitochondrial OS=Homo sapiens OX=9606 GN=PCK2 PE=1 SV=4	Q16822	0.8	1	1	0.833333	0.9	0.888889	0.99
WD40 repeat-containing protein SMU1 OS=Homo sapiens OX=9606 GN=SMU1 PE=1 SV=2	Q2TAY7	0.9	0.9	0.9	0.9	0.9	0.9	0.99
E3 ubiquitin-protein ligase RNF213 OS=Homo sapiens OX=9606 GN=RNF213 PE=1 SV=3	Q63HN8	0.9	0.8	0.818182	0.888889	0.85	0.857143	0.99
Epithelial splicing regulatory protein 1 OS=Homo sapiens OX=9606 GN=ESRP1 PE=1 SV=2	Q6NXG1	0.9	0.8	0.818182	0.888889	0.85	0.857143	0.99
von Willebrand factor A domain-containing protein 1 OS=Homo sapiens OX=9606 GN=VWA1 PE=1 SV=1	Q6PCB0	0.9	0.9	0.9	0.9	0.9	0.9	0.99
Aspartate--tRNA ligase, mitochondrial OS=Homo sapiens OX=9606 GN=DARS2 PE=1 SV=1	Q6PI48	0.8	1	1	0.833333	0.9	0.888889	0.99
Calcium homeostasis endoplasmic reticulum protein OS=Homo sapiens OX=9606 GN=CHERP PE=1 SV=3	Q8IWX8	0.9	0.9	0.9	0.9	0.9	0.9	0.99
Cell cycle and apoptosis regulator protein 2 OS=Homo sapiens OX=9606 GN=CCAR2 PE=1 SV=2	Q8N163	0.8	1	1	0.833333	0.9	0.888889	0.99
Cleavage and polyadenylation specificity factor subunit 7 OS=Homo sapiens OX=9606 GN=CPSF7 PE=1 SV=1	Q8N684	0.8	1	1	0.833333	0.9	0.888889	0.99
Transmembrane 9 superfamily member 4 OS=Homo sapiens OX=9606 GN=TM9SF4 PE=1 SV=2	Q92544	0.8	1	1	0.833333	0.9	0.888889	0.99
Heat shock protein 105 kDa OS=Homo sapiens OX=9606 GN=HSPH1 PE=1 SV=1	Q92598	0.9	0.9	0.9	0.9	0.9	0.9	0.99
Acidic leucine-rich nuclear phosphoprotein 32 family member B OS=Homo sapiens OX=9606 GN=ANP32B PE=1 SV=1	Q92688	0.9	0.9	0.9	0.9	0.9	0.9	0.99
Probable ATP-dependent RNA helicase DDX17 OS=Homo sapiens OX=9606 GN=DDX17 PE=1 SV=2	Q92841	0.9	0.9	0.9	0.9	0.9	0.9	0.99
DNA repair protein RAD50 OS=Homo sapiens OX=9606 GN=RAD50 PE=1 SV=1	Q92878	0.9	0.9	0.9	0.9	0.9	0.9	0.99
Ribulose-phosphate 3-epimerase OS=Homo sapiens OX=9606 GN=RPE PE=1 SV=1	Q96AT9	0.9	0.9	0.9	0.9	0.9	0.9	0.99
Phosphotriesterase-related protein OS=Homo sapiens OX=9606 GN=PTER PE=1 SV=1	Q96BW5	0.9	0.9	0.9	0.9	0.9	0.9	0.99
DAZ-associated protein 1 OS=Homo sapiens OX=9606 GN=DAZAP1 PE=1 SV=1	Q96EP5	0.8	1	1	0.833333	0.9	0.888889	0.99
Far upstream element-binding protein 3 OS=Homo sapiens OX=9606 GN=FUBP3 PE=1 SV=2	Q96I24	0.8	1	1	0.833333	0.9	0.888889	0.99
NudC domain-containing protein 1 OS=Homo sapiens OX=9606 GN=NUDCD1 PE=1 SV=2	Q96RS6	0.8	1	1	0.833333	0.9	0.888889	0.99
Niban-like protein 1 OS=Homo sapiens OX=9606 GN=FAM129B PE=1 SV=3	Q96TA1	0.9	1	1	0.909091	0.95	0.947368	0.99
c-Myc-binding protein OS=Homo sapiens OX=9606 GN=MYCBP PE=1 SV=3	Q99417	0.9	0.9	0.9	0.9	0.9	0.9	0.99
Nucleosome assembly protein 1-like 4 OS=Homo sapiens OX=9606 GN=NAP1L4 PE=1 SV=1	Q99733	0.9	0.9	0.9	0.9	0.9	0.9	0.99
T-complex protein 1 subunit eta OS=Homo sapiens OX=9606 GN=CCT7 PE=1 SV=2	Q99832	0.9	0.9	0.9	0.9	0.9	0.9	0.99
Chitobiosyldiphosphodolichol beta-mannosyltransferase OS=Homo sapiens OX=9606 GN=ALG1 PE=1 SV=2	Q9BT22	0.7	1	1	0.769231	0.85	0.823529	0.99
Heterogeneous nuclear ribonucleoprotein U-like protein 1 OS=Homo sapiens OX=9606 GN=HNRNPUL1 PE=1 SV=2	Q9BUJ2	0.9	0.9	0.9	0.9	0.9	0.9	0.99
39S ribosomal protein L1, mitochondrial OS=Homo sapiens OX=9606 GN=MRPL1 PE=1 SV=2	Q9BYD6	0.9	0.9	0.9	0.9	0.9	0.9	0.99
Inorganic pyrophosphatase 2, mitochondrial OS=Homo sapiens OX=9606 GN=PPA2 PE=1 SV=2	Q9H2U2	0.9	0.9	0.9	0.9	0.9	0.9	0.99
BolA-like protein 2 OS=Homo sapiens OX=9606 GN=BOLA2 PE=1 SV=1	Q9H3K6	0.9	1	1	0.909091	0.95	0.947368	0.99
GDP-fucose protein O-fucosyltransferase 1 OS=Homo sapiens OX=9606 GN=POFUT1 PE=1 SV=1	Q9H488	0.9	0.9	0.9	0.9	0.9	0.9	0.99
Sialate O-acetylesterase OS=Homo sapiens OX=9606 GN=SIAE PE=1 SV=1	Q9HAT2	0.9	1	1	0.909091	0.95	0.947368	0.99
Methylcrotonoyl-CoA carboxylase beta chain, mitochondrial OS=Homo sapiens OX=9606 GN=MCCC2 PE=1 SV=1	Q9HCC0	0.9	0.9	0.9	0.9	0.9	0.9	0.99
Transmembrane 9 superfamily member 3 OS=Homo sapiens OX=9606 GN=TM9SF3 PE=1 SV=2	Q9HD45	0.9	1	1	0.909091	0.95	0.947368	0.99
MICOS complex subunit MIC19 OS=Homo sapiens OX=9606 GN=CHCHD3 PE=1 SV=1	Q9NX63	0.8	1	1	0.833333	0.9	0.888889	0.99
Constitutive coactivator of PPAR-gamma-like protein 1 OS=Homo sapiens OX=9606 GN=FAM120A PE=1 SV=2	Q9NZB2	0.9	0.9	0.9	0.9	0.9	0.9	0.99
Cysteine and histidine-rich domain-containing protein 1 OS=Homo sapiens OX=9606 GN=CHORDC1 PE=1 SV=2	Q9UHD1	0.9	0.9	0.9	0.9	0.9	0.9	0.99
Prefoldin subunit 2 OS=Homo sapiens OX=9606 GN=PFDN2 PE=1 SV=1	Q9UHV9	0.9	1	1	0.909091	0.95	0.947368	0.99
RuvB-like 1 OS=Homo sapiens OX=9606 GN=RUVBL1 PE=1 SV=1	Q9Y265	0.9	0.9	0.9	0.9	0.9	0.9	0.99
Putative RNA-binding protein Luc7-like 2 OS=Homo sapiens OX=9606 GN=LUC7L2 PE=1 SV=2	Q9Y383	0.8	0.9	0.888889	0.818182	0.85	0.842105	0.99
Nucleolar complex protein 2 homolog OS=Homo sapiens OX=9606 GN=NOC2L PE=1 SV=4	Q9Y3T9	0.8	1	1	0.833333	0.9	0.888889	0.99
FACT complex subunit SPT16 OS=Homo sapiens OX=9606 GN=SUPT16H PE=1 SV=1	Q9Y5B9	0.8	1	1	0.833333	0.9	0.888889	0.99
RNA-binding protein 8A OS=Homo sapiens OX=9606 GN=RBM8A PE=1 SV=1	Q9Y5S9	0.9	0.9	0.9	0.9	0.9	0.9	0.99
Insulin-like growth factor 2 mRNA-binding protein 2 OS=Homo sapiens OX=9606 GN=IGF2BP2 PE=1 SV=2	Q9Y6M1	0.9	0.9	0.9	0.9	0.9	0.9	0.99
Acetolactate synthase-like protein OS=Homo sapiens OX=9606 GN=ILVBL PE=1 SV=2	A1L0T0	0.7	1	1	0.769231	0.85	0.823529	0.98
Alkyldihydroxyacetonephosphate synthase, peroxisomal OS=Homo sapiens OX=9606 GN=AGPS PE=1 SV=1	O00116	0.8	0.9	0.888889	0.818182	0.85	0.842105	0.98
26S proteasome non-ATPase regulatory subunit 11 OS=Homo sapiens OX=9606 GN=PSMD11 PE=1 SV=3	O00231	0.9	0.8	0.818182	0.888889	0.85	0.857143	0.98
26S proteasome non-ATPase regulatory subunit 12 OS=Homo sapiens OX=9606 GN=PSMD12 PE=1 SV=3	O00232	0.9	0.9	0.9	0.9	0.9	0.9	0.98
Membrane-associated progesterone receptor component 1 OS=Homo sapiens OX=9606 GN=PGRMC1 PE=1 SV=3	O00264	0.8	0.9	0.888889	0.818182	0.85	0.842105	0.98
Eukaryotic translation initiation factor 3 subunit F OS=Homo sapiens OX=9606 GN=EIF3F PE=1 SV=1	O00303	0.9	0.9	0.9	0.9	0.9	0.9	0.98
ATP-dependent RNA helicase DDX3X OS=Homo sapiens OX=9606 GN=DDX3X PE=1 SV=3	O00571	0.8	0.9	0.888889	0.818182	0.85	0.842105	0.98
D-3-phosphoglycerate dehydrogenase OS=Homo sapiens OX=9606 GN=PHGDH PE=1 SV=4	O43175	1	0.9	0.909091	1	0.95	0.952381	0.98
Cytoplasmic dynein 1 light intermediate chain 2 OS=Homo sapiens OX=9606 GN=DYNC1LI2 PE=1 SV=1	O43237	0.8	1	1	0.833333	0.9	0.888889	0.98
Mitochondrial import inner membrane translocase subunit TIM44 OS=Homo sapiens OX=9606 GN=TIMM44 PE=1 SV=2	O43615	0.9	1	1	0.909091	0.95	0.947368	0.98
Phosphoribosyl pyrophosphate synthase-associated protein 2 OS=Homo sapiens OX=9606 GN=PRPSAP2 PE=1 SV=1	O60256	0.8	0.9	0.888889	0.818182	0.85	0.842105	0.98
Heterogeneous nuclear ribonucleoprotein Q OS=Homo sapiens OX=9606 GN=SYNCRIP PE=1 SV=2	O60506	0.9	0.9	0.9	0.9	0.9	0.9	0.98
UDP-glucose 6-dehydrogenase OS=Homo sapiens OX=9606 GN=UGDH PE=1 SV=1	O60701	0.9	1	1	0.909091	0.95	0.947368	0.98
DnaJ homolog subfamily A member 2 OS=Homo sapiens OX=9606 GN=DNAJA2 PE=1 SV=1	O60884	0.8	0.7	0.727273	0.777778	0.75	0.761905	0.98
PC4 and SFRS1-interacting protein OS=Homo sapiens OX=9606 GN=PSIP1 PE=1 SV=1	O75475	0.9	1	1	0.909091	0.95	0.947368	0.98
Interferon-inducible double-stranded RNA-dependent protein kinase activator A OS=Homo sapiens OX=9606 GN=PRKRA PE=1 SV=1	O75569	0.7	0.8	0.777778	0.727273	0.75	0.736842	0.98
Eukaryotic translation initiation factor 3 subunit J OS=Homo sapiens OX=9606 GN=EIF3J PE=1 SV=2	O75822	0.9	0.9	0.9	0.9	0.9	0.9	0.98
Isocitrate dehydrogenase [NADP] cytoplasmic OS=Homo sapiens OX=9606 GN=IDH1 PE=1 SV=2	O75874	0.7	0.9	0.875	0.75	0.8	0.777778	0.98
Zinc finger Ran-binding domain-containing protein 2 OS=Homo sapiens OX=9606 GN=ZRANB2 PE=1 SV=2	O95218	0.8	0.9	0.888889	0.818182	0.85	0.842105	0.98
6-phosphogluconolactonase OS=Homo sapiens OX=9606 GN=PGLS PE=1 SV=2	O95336	0.8	1	1	0.833333	0.9	0.888889	0.98
Activator of 90 kDa heat shock protein ATPase homolog 1 OS=Homo sapiens OX=9606 GN=AHSA1 PE=1 SV=1	O95433	0.8	0.9	0.888889	0.818182	0.85	0.842105	0.98
Mitochondrial pyruvate carrier 2 OS=Homo sapiens OX=9606 GN=MPC2 PE=1 SV=1	O95563	0.8	0.9	0.888889	0.818182	0.85	0.842105	0.98
Glutathione reductase, mitochondrial OS=Homo sapiens OX=9606 GN=GSR PE=1 SV=2	P00390	0.9	1	1	0.909091	0.95	0.947368	0.98
HLA class II histocompatibility antigen, DP beta 1 chain OS=Homo sapiens OX=9606 GN=HLA-DPB1 PE=1 SV=1	P04440	0.8	0.9	0.888889	0.818182	0.85	0.842105	0.98
ATP synthase subunit beta, mitochondrial OS=Homo sapiens OX=9606 GN=ATP5F1B PE=1 SV=3	P06576	0.8	0.9	0.888889	0.818182	0.85	0.842105	0.98
Nucleophosmin OS=Homo sapiens OX=9606 GN=NPM1 PE=1 SV=2	P06748	0.9	0.9	0.9	0.9	0.9	0.9	0.98
Heat shock protein HSP 90-alpha OS=Homo sapiens OX=9606 GN=HSP90AA1 PE=1 SV=5	P07900	0.8	0.9	0.888889	0.818182	0.85	0.842105	0.98
Cytochrome b-c1 complex subunit 6, mitochondrial OS=Homo sapiens OX=9606 GN=UQCRH PE=1 SV=2	P07919	0.9	0.9	0.9	0.9	0.9	0.9	0.98
Integrin alpha-5 OS=Homo sapiens OX=9606 GN=ITGA5 PE=1 SV=2	P08648	0.9	0.8	0.818182	0.888889	0.85	0.857143	0.98
High mobility group protein B1 OS=Homo sapiens OX=9606 GN=HMGB1 PE=1 SV=3	P09429	0.9	0.9	0.9	0.9	0.9	0.9	0.98
Poly [ADP-ribose] polymerase 1 OS=Homo sapiens OX=9606 GN=PARP1 PE=1 SV=4	P09874	0.8	0.9	0.888889	0.818182	0.85	0.842105	0.98
Calmodulin-3 OS=Homo sapiens OX=9606 GN=CALM3 PE=1 SV=1	P0DP25	0.9	0.8	0.818182	0.888889	0.85	0.857143	0.98
Pyruvate dehydrogenase E1 component subunit beta, mitochondrial OS=Homo sapiens OX=9606 GN=PDHB PE=1 SV=3	P11177	0.9	0.9	0.9	0.9	0.9	0.9	0.98
Aspartate--tRNA ligase, cytoplasmic OS=Homo sapiens OX=9606 GN=DARS PE=1 SV=2	P14868	0.9	0.9	0.9	0.9	0.9	0.9	0.98
Eukaryotic peptide chain release factor GTP-binding subunit ERF3A OS=Homo sapiens OX=9606 GN=GSPT1 PE=1 SV=1	P15170	0.9	0.9	0.9	0.9	0.9	0.9	0.98
26S proteasome regulatory subunit 6A OS=Homo sapiens OX=9606 GN=PSMC3 PE=1 SV=3	P17980	0.8	0.9	0.888889	0.818182	0.85	0.842105	0.98
Nuclear factor NF-kappa-B p105 subunit OS=Homo sapiens OX=9606 GN=NFKB1 PE=1 SV=2	P19838	0.7	0.9	0.875	0.75	0.8	0.777778	0.98
Splicing factor, proline- and glutamine-rich OS=Homo sapiens OX=9606 GN=SFPQ PE=1 SV=2	P23246	0.8	0.8	0.8	0.8	0.8	0.8	0.98
60S ribosomal protein L13 OS=Homo sapiens OX=9606 GN=RPL13 PE=1 SV=4	P26373	0.8	1	1	0.833333	0.9	0.888889	0.98
Threonine--tRNA ligase, cytoplasmic OS=Homo sapiens OX=9606 GN=TARS PE=1 SV=3	P26639	0.9	0.8	0.818182	0.888889	0.85	0.857143	0.98
Proteasome subunit beta type-8 OS=Homo sapiens OX=9606 GN=PSMB8 PE=1 SV=3	P28062	0.8	0.9	0.888889	0.818182	0.85	0.842105	0.98
Peroxiredoxin-6 OS=Homo sapiens OX=9606 GN=PRDX6 PE=1 SV=3	P30041	0.6	0.8	0.75	0.666667	0.7	0.666667	0.98
Peroxiredoxin-5, mitochondrial OS=Homo sapiens OX=9606 GN=PRDX5 PE=1 SV=4	P30044	0.9	0.8	0.818182	0.888889	0.85	0.857143	0.98
Thioredoxin-dependent peroxide reductase, mitochondrial OS=Homo sapiens OX=9606 GN=PRDX3 PE=1 SV=3	P30048	0.8	0.9	0.888889	0.818182	0.85	0.842105	0.98
DnaJ homolog subfamily A member 1 OS=Homo sapiens OX=9606 GN=DNAJA1 PE=1 SV=2	P31689	0.9	0.9	0.9	0.9	0.9	0.9	0.98
Alpha-adducin OS=Homo sapiens OX=9606 GN=ADD1 PE=1 SV=2	P35611	0.8	0.9	0.888889	0.818182	0.85	0.842105	0.98
Hydroxymethylglutaryl-CoA lyase, mitochondrial OS=Homo sapiens OX=9606 GN=HMGCL PE=1 SV=2	P35914	0.8	1	1	0.833333	0.9	0.888889	0.98
Oxygen-dependent coproporphyrinogen-III oxidase, mitochondrial OS=Homo sapiens OX=9606 GN=CPOX PE=1 SV=3	P36551	0.8	1	1	0.833333	0.9	0.888889	0.98
Stress-70 protein, mitochondrial OS=Homo sapiens OX=9606 GN=HSPA9 PE=1 SV=2	P38646	0.8	0.9	0.888889	0.818182	0.85	0.842105	0.98
Acidic leucine-rich nuclear phosphoprotein 32 family member A OS=Homo sapiens OX=9606 GN=ANP32A PE=1 SV=1	P39687	0.8	0.9	0.888889	0.818182	0.85	0.842105	0.98
N-alpha-acetyltransferase 10 OS=Homo sapiens OX=9606 GN=NAA10 PE=1 SV=1	P41227	0.8	0.9	0.888889	0.818182	0.85	0.842105	0.98
40S ribosomal protein S27 OS=Homo sapiens OX=9606 GN=RPS27 PE=1 SV=3	P42677	0.9	1	1	0.909091	0.95	0.947368	0.98
Matrin-3 OS=Homo sapiens OX=9606 GN=MATR3 PE=1 SV=2	P43243	0.8	0.9	0.888889	0.818182	0.85	0.842105	0.98
Glycerol-3-phosphate dehydrogenase, mitochondrial OS=Homo sapiens OX=9606 GN=GPD2 PE=1 SV=3	P43304	0.7	1	1	0.769231	0.85	0.823529	0.98
Voltage-dependent anion-selective channel protein 2 OS=Homo sapiens OX=9606 GN=VDAC2 PE=1 SV=2	P45880	0.9	0.8	0.818182	0.888889	0.85	0.857143	0.98
Glutamine--tRNA ligase OS=Homo sapiens OX=9606 GN=QARS PE=1 SV=1	P47897	0.8	0.9	0.888889	0.818182	0.85	0.842105	0.98
CD97 antigen OS=Homo sapiens OX=9606 GN=CD97 PE=1 SV=4	P48960	0.8	0.9	0.888889	0.818182	0.85	0.842105	0.98
60S ribosomal protein L14 OS=Homo sapiens OX=9606 GN=RPL14 PE=1 SV=4	P50914	0.8	0.9	0.888889	0.818182	0.85	0.842105	0.98
Hepatoma-derived growth factor OS=Homo sapiens OX=9606 GN=HDGF PE=1 SV=1	P51858	0.9	0.9	0.9	0.9	0.9	0.9	0.98
Heterogeneous nuclear ribonucleoprotein M OS=Homo sapiens OX=9606 GN=HNRNPM PE=1 SV=3	P52272	0.9	0.9	0.9	0.9	0.9	0.9	0.98
DNA mismatch repair protein Msh6 OS=Homo sapiens OX=9606 GN=MSH6 PE=1 SV=2	P52701	0.8	0.9	0.888889	0.818182	0.85	0.842105	0.98
2-iminobutanoate/2-iminopropanoate deaminase OS=Homo sapiens OX=9606 GN=RIDA PE=1 SV=1	P52758	0.8	1	1	0.833333	0.9	0.888889	0.98
Tricarboxylate transport protein, mitochondrial OS=Homo sapiens OX=9606 GN=SLC25A1 PE=1 SV=2	P53007	0.8	0.9	0.888889	0.818182	0.85	0.842105	0.98
Cytosolic Fe-S cluster assembly factor NUBP1 OS=Homo sapiens OX=9606 GN=NUBP1 PE=1 SV=2	P53384	0.8	1	1	0.833333	0.9	0.888889	0.98
Adenylate kinase 2, mitochondrial OS=Homo sapiens OX=9606 GN=AK2 PE=1 SV=2	P54819	0.9	0.9	0.9	0.9	0.9	0.9	0.98
Eukaryotic translation initiation factor 5 OS=Homo sapiens OX=9606 GN=EIF5 PE=1 SV=2	P55010	0.9	0.9	0.9	0.9	0.9	0.9	0.98
Developmentally-regulated GTP-binding protein 2 OS=Homo sapiens OX=9606 GN=DRG2 PE=1 SV=1	P55039	0.8	0.9	0.888889	0.818182	0.85	0.842105	0.98
Ras-related protein Rab-25 OS=Homo sapiens OX=9606 GN=RAB25 PE=1 SV=2	P57735	0.8	1	1	0.833333	0.9	0.888889	0.98
Glia maturation factor beta OS=Homo sapiens OX=9606 GN=GMFB PE=1 SV=2	P60983	0.8	0.9	0.888889	0.818182	0.85	0.842105	0.98
14-3-3 protein epsilon OS=Homo sapiens OX=9606 GN=YWHAE PE=1 SV=1	P62258	0.9	1	1	0.909091	0.95	0.947368	0.98
40S ribosomal protein S14 OS=Homo sapiens OX=9606 GN=RPS14 PE=1 SV=3	P62263	0.9	1	1	0.909091	0.95	0.947368	0.98
40S ribosomal protein S18 OS=Homo sapiens OX=9606 GN=RPS18 PE=1 SV=3	P62269	0.8	0.8	0.8	0.8	0.8	0.8	0.98
14-3-3 protein zeta/delta OS=Homo sapiens OX=9606 GN=YWHAZ PE=1 SV=1	P63104	1	0.9	0.909091	1	0.95	0.952381	0.98
Methylmalonate-semialdehyde dehydrogenase [acylating], mitochondrial OS=Homo sapiens OX=9606 GN=ALDH6A1 PE=1 SV=2	Q02252	0.8	0.9	0.888889	0.818182	0.85	0.842105	0.98
Dual specificity mitogen-activated protein kinase kinase 1 OS=Homo sapiens OX=9606 GN=MAP2K1 PE=1 SV=2	Q02750	0.8	0.9	0.888889	0.818182	0.85	0.842105	0.98
Eukaryotic translation initiation factor 4 gamma 1 OS=Homo sapiens OX=9606 GN=EIF4G1 PE=1 SV=4	Q04637	0.9	0.8	0.818182	0.888889	0.85	0.857143	0.98
60S ribosomal protein L18 OS=Homo sapiens OX=9606 GN=RPL18 PE=1 SV=2	Q07020	0.9	0.8	0.818182	0.888889	0.85	0.857143	0.98
Peptidyl-prolyl cis-trans isomerase D OS=Homo sapiens OX=9606 GN=PPID PE=1 SV=3	Q08752	0.9	0.9	0.9	0.9	0.9	0.9	0.98
AP-1 complex subunit beta-1 OS=Homo sapiens OX=9606 GN=AP1B1 PE=1 SV=2	Q10567	0.8	1	1	0.833333	0.9	0.888889	0.98
C-terminal-binding protein 1 OS=Homo sapiens OX=9606 GN=CTBP1 PE=1 SV=2	Q13363	0.8	0.9	0.888889	0.818182	0.85	0.842105	0.98
Splicing factor 3B subunit 2 OS=Homo sapiens OX=9606 GN=SF3B2 PE=1 SV=2	Q13435	0.9	0.9	0.9	0.9	0.9	0.9	0.98
Protein scribble homolog OS=Homo sapiens OX=9606 GN=SCRIB PE=1 SV=4	Q14160	0.8	1	1	0.833333	0.9	0.888889	0.98
Ensconsin OS=Homo sapiens OX=9606 GN=MAP7 PE=1 SV=1	Q14244	0.8	0.9	0.888889	0.818182	0.85	0.842105	0.98
Squamous cell carcinoma antigen recognized by T-cells 3 OS=Homo sapiens OX=9606 GN=SART3 PE=1 SV=1	Q15020	0.9	0.9	0.9	0.9	0.9	0.9	0.98
Serum paraoxonase/arylesterase 2 OS=Homo sapiens OX=9606 GN=PON2 PE=1 SV=4	Q15165	0.9	0.9	0.9	0.9	0.9	0.9	0.98
Pumilio homolog 3 OS=Homo sapiens OX=9606 GN=PUM3 PE=1 SV=3	Q15397	0.8	0.9	0.888889	0.818182	0.85	0.842105	0.98
Sterol-4-alpha-carboxylate 3-dehydrogenase, decarboxylating OS=Homo sapiens OX=9606 GN=NSDHL PE=1 SV=2	Q15738	1	0.9	0.909091	1	0.95	0.952381	0.98
Ras-related protein Rab-11B OS=Homo sapiens OX=9606 GN=RAB11B PE=1 SV=4	Q15907	0.9	1	1	0.909091	0.95	0.947368	0.98
Serine/arginine-rich splicing factor 7 OS=Homo sapiens OX=9606 GN=SRSF7 PE=1 SV=1	Q16629	0.9	0.9	0.9	0.9	0.9	0.9	0.98
UTP--glucose-1-phosphate uridylyltransferase OS=Homo sapiens OX=9606 GN=UGP2 PE=1 SV=5	Q16851	0.8	1	1	0.833333	0.9	0.888889	0.98
Mitochondrial import inner membrane translocase subunit TIM50 OS=Homo sapiens OX=9606 GN=TIMM50 PE=1 SV=2	Q3ZCQ8	0.8	0.9	0.888889	0.818182	0.85	0.842105	0.98
Protein FAM98B OS=Homo sapiens OX=9606 GN=FAM98B PE=1 SV=1	Q52LJ0	0.9	0.9	0.9	0.9	0.9	0.9	0.98
RRP12-like protein OS=Homo sapiens OX=9606 GN=RRP12 PE=1 SV=2	Q5JTH9	0.9	0.8	0.818182	0.888889	0.85	0.857143	0.98
2',5'-phosphodiesterase 12 OS=Homo sapiens OX=9606 GN=PDE12 PE=1 SV=2	Q6L8Q7	0.8	0.9	0.888889	0.818182	0.85	0.842105	0.98
Basic leucine zipper and W2 domain-containing protein 1 OS=Homo sapiens OX=9606 GN=BZW1 PE=1 SV=1	Q7L1Q6	0.9	0.8	0.818182	0.888889	0.85	0.857143	0.98
E3 ubiquitin-protein ligase HUWE1 OS=Homo sapiens OX=9606 GN=HUWE1 PE=1 SV=3	Q7Z6Z7	0.9	1	1	0.909091	0.95	0.947368	0.98
Estradiol 17-beta-dehydrogenase 11 OS=Homo sapiens OX=9606 GN=HSD17B11 PE=1 SV=3	Q8NBQ5	0.7	1	1	0.769231	0.85	0.823529	0.98
eIF-2-alpha kinase activator GCN1 OS=Homo sapiens OX=9606 GN=GCN1 PE=1 SV=6	Q92616	0.7	0.9	0.875	0.75	0.8	0.777778	0.98
Transcription elongation factor A protein-like 3 OS=Homo sapiens OX=9606 GN=TCEAL3 PE=1 SV=1	Q969E4	0.9	0.9	0.9	0.9	0.9	0.9	0.98
FAST kinase domain-containing protein 4 OS=Homo sapiens OX=9606 GN=TBRG4 PE=1 SV=1	Q969Z0	0.8	0.9	0.888889	0.818182	0.85	0.842105	0.98
Synapse-associated protein 1 OS=Homo sapiens OX=9606 GN=SYAP1 PE=1 SV=1	Q96A49	0.8	0.9	0.888889	0.818182	0.85	0.842105	0.98
EF-hand domain-containing protein D2 OS=Homo sapiens OX=9606 GN=EFHD2 PE=1 SV=1	Q96C19	0.9	0.9	0.9	0.9	0.9	0.9	0.98
Pentatricopeptide repeat domain-containing protein 3, mitochondrial OS=Homo sapiens OX=9606 GN=PTCD3 PE=1 SV=3	Q96EY7	0.8	0.9	0.888889	0.818182	0.85	0.842105	0.98
RNA-binding protein 14 OS=Homo sapiens OX=9606 GN=RBM14 PE=1 SV=2	Q96PK6	0.9	0.8	0.818182	0.888889	0.85	0.857143	0.98
Vacuolar protein sorting-associated protein 35 OS=Homo sapiens OX=9606 GN=VPS35 PE=1 SV=2	Q96QK1	0.8	0.8	0.8	0.8	0.8	0.8	0.98
Heterogeneous nuclear ribonucleoprotein A/B OS=Homo sapiens OX=9606 GN=HNRNPAB PE=1 SV=2	Q99729	1	0.9	0.909091	1	0.95	0.952381	0.98
Transmembrane 9 superfamily member 2 OS=Homo sapiens OX=9606 GN=TM9SF2 PE=1 SV=1	Q99805	0.7	1	1	0.769231	0.85	0.823529	0.98
COP9 signalosome complex subunit 4 OS=Homo sapiens OX=9606 GN=COPS4 PE=1 SV=1	Q9BT78	0.8	0.9	0.888889	0.818182	0.85	0.842105	0.98
Histidine triad nucleotide-binding protein 2, mitochondrial OS=Homo sapiens OX=9606 GN=HINT2 PE=1 SV=1	Q9BX68	0.8	1	1	0.833333	0.9	0.888889	0.98
Calcyclin-binding protein OS=Homo sapiens OX=9606 GN=CACYBP PE=1 SV=2	Q9HB71	0.8	0.9	0.888889	0.818182	0.85	0.842105	0.98
Ras-related protein Rab-18 OS=Homo sapiens OX=9606 GN=RAB18 PE=1 SV=1	Q9NP72	0.7	1	1	0.769231	0.85	0.823529	0.98
Diablo homolog, mitochondrial OS=Homo sapiens OX=9606 GN=DIABLO PE=1 SV=1	Q9NR28	0.9	0.9	0.9	0.9	0.9	0.9	0.98
Nucleolar RNA helicase 2 OS=Homo sapiens OX=9606 GN=DDX21 PE=1 SV=5	Q9NR30	0.9	1	1	0.909091	0.95	0.947368	0.98
Isoleucine--tRNA ligase, mitochondrial OS=Homo sapiens OX=9606 GN=IARS2 PE=1 SV=2	Q9NSE4	0.9	0.8	0.818182	0.888889	0.85	0.857143	0.98
Pyridoxine-5'-phosphate oxidase OS=Homo sapiens OX=9606 GN=PNPO PE=1 SV=1	Q9NVS9	0.9	0.9	0.9	0.9	0.9	0.9	0.98
Dipeptidyl peptidase 3 OS=Homo sapiens OX=9606 GN=DPP3 PE=1 SV=2	Q9NY33	1	0.8	0.833333	1	0.9	0.909091	0.98
Bcl-2-associated transcription factor 1 OS=Homo sapiens OX=9606 GN=BCLAF1 PE=1 SV=2	Q9NYF8	0.9	0.9	0.9	0.9	0.9	0.9	0.98
Diphosphoinositol polyphosphate phosphohydrolase 2 OS=Homo sapiens OX=9606 GN=NUDT4 PE=1 SV=2	Q9NZJ9	0.8	0.9	0.888889	0.818182	0.85	0.842105	0.98
STE20/SPS1-related proline-alanine-rich protein kinase OS=Homo sapiens OX=9606 GN=STK39 PE=1 SV=3	Q9UEW8	0.8	0.9	0.888889	0.818182	0.85	0.842105	0.98
Poly(U)-binding-splicing factor PUF60 OS=Homo sapiens OX=9606 GN=PUF60 PE=1 SV=1	Q9UHX1	0.9	0.9	0.9	0.9	0.9	0.9	0.98
Aspartyl aminopeptidase OS=Homo sapiens OX=9606 GN=DNPEP PE=1 SV=1	Q9ULA0	0.8	1	1	0.833333	0.9	0.888889	0.98
Ubiquilin-1 OS=Homo sapiens OX=9606 GN=UBQLN1 PE=1 SV=2	Q9UMX0	0.8	0.9	0.888889	0.818182	0.85	0.842105	0.98
Protein kinase C and casein kinase substrate in neurons protein 2 OS=Homo sapiens OX=9606 GN=PACSIN2 PE=1 SV=2	Q9UNF0	0.8	1	1	0.833333	0.9	0.888889	0.98
Polymerase delta-interacting protein 2 OS=Homo sapiens OX=9606 GN=POLDIP2 PE=1 SV=1	Q9Y2S7	0.8	0.9	0.888889	0.818182	0.85	0.842105	0.98
Thyroid hormone receptor-associated protein 3 OS=Homo sapiens OX=9606 GN=THRAP3 PE=1 SV=2	Q9Y2W1	0.8	0.9	0.888889	0.818182	0.85	0.842105	0.98
Mitochondrial import inner membrane translocase subunit Tim9 OS=Homo sapiens OX=9606 GN=TIMM9 PE=1 SV=1	Q9Y5J7	0.8	0.9	0.888889	0.818182	0.85	0.842105	0.98
Mitochondrial import inner membrane translocase subunit Tim13 OS=Homo sapiens OX=9606 GN=TIMM13 PE=1 SV=1	Q9Y5L4	0.8	0.9	0.888889	0.818182	0.85	0.842105	0.98
GTP-binding protein SAR1b OS=Homo sapiens OX=9606 GN=SAR1B PE=1 SV=1	Q9Y6B6	1	0.8	0.833333	1	0.9	0.909091	0.98
Importin-5 OS=Homo sapiens OX=9606 GN=IPO5 PE=1 SV=4	O00410	0.9	0.9	0.9	0.9	0.9	0.9	0.97
High mobility group protein B3 OS=Homo sapiens OX=9606 GN=HMGB3 PE=1 SV=4	O15347	0.7	0.9	0.875	0.75	0.8	0.777778	0.97
Eukaryotic translation elongation factor 1 epsilon-1 OS=Homo sapiens OX=9606 GN=EEF1E1 PE=1 SV=1	O43324	0.8	1	1	0.833333	0.9	0.888889	0.97
Protein diaphanous homolog 1 OS=Homo sapiens OX=9606 GN=DIAPH1 PE=1 SV=2	O60610	0.7	0.9	0.875	0.75	0.8	0.777778	0.97
Catenin delta-1 OS=Homo sapiens OX=9606 GN=CTNND1 PE=1 SV=1	O60716	0.8	1	1	0.833333	0.9	0.888889	0.97
Erlin-1 OS=Homo sapiens OX=9606 GN=ERLIN1 PE=1 SV=1	O75477	0.8	0.9	0.888889	0.818182	0.85	0.842105	0.97
Barrier-to-autointegration factor OS=Homo sapiens OX=9606 GN=BANF1 PE=1 SV=1	O75531	0.9	0.9	0.9	0.9	0.9	0.9	0.97
U5 small nuclear ribonucleoprotein 200 kDa helicase OS=Homo sapiens OX=9606 GN=SNRNP200 PE=1 SV=2	O75643	0.8	0.9	0.888889	0.818182	0.85	0.842105	0.97
3'(2'),5'-bisphosphate nucleotidase 1 OS=Homo sapiens OX=9606 GN=BPNT1 PE=1 SV=1	O95861	0.8	0.9	0.888889	0.818182	0.85	0.842105	0.97
Bifunctional glutamate/proline--tRNA ligase OS=Homo sapiens OX=9606 GN=EPRS PE=1 SV=5	P07814	0.8	0.9	0.888889	0.818182	0.85	0.842105	0.97
40S ribosomal protein SA OS=Homo sapiens OX=9606 GN=RPSA PE=1 SV=4	P08865	0.9	0.8	0.818182	0.888889	0.85	0.857143	0.97
Heterogeneous nuclear ribonucleoprotein A1 OS=Homo sapiens OX=9606 GN=HNRNPA1 PE=1 SV=5	P09651	0.9	0.9	0.9	0.9	0.9	0.9	0.97
60 kDa SS-A/Ro ribonucleoprotein OS=Homo sapiens OX=9606 GN=RO60 PE=1 SV=2	P10155	0.6	0.9	0.857143	0.692308	0.75	0.705882	0.97
Small nuclear ribonucleoprotein-associated proteins B and B' OS=Homo sapiens OX=9606 GN=SNRPB PE=1 SV=2	P14678	0.9	0.9	0.9	0.9	0.9	0.9	0.97
Galectin-3 OS=Homo sapiens OX=9606 GN=LGALS3 PE=1 SV=5	P17931	0.9	0.8	0.818182	0.888889	0.85	0.857143	0.97
Proteasome subunit beta type-1 OS=Homo sapiens OX=9606 GN=PSMB1 PE=1 SV=2	P20618	0.8	0.9	0.888889	0.818182	0.85	0.842105	0.97
rRNA 2'-O-methyltransferase fibrillarin OS=Homo sapiens OX=9606 GN=FBL PE=1 SV=2	P22087	0.9	0.8	0.818182	0.888889	0.85	0.857143	0.97
Ubiquitin-like modifier-activating enzyme 1 OS=Homo sapiens OX=9606 GN=UBA1 PE=1 SV=3	P22314	0.9	0.9	0.9	0.9	0.9	0.9	0.97
Nucleoside diphosphate kinase B OS=Homo sapiens OX=9606 GN=NME2 PE=1 SV=1	P22392	0.9	0.8	0.818182	0.888889	0.85	0.857143	0.97
NAD-dependent malic enzyme, mitochondrial OS=Homo sapiens OX=9606 GN=ME2 PE=1 SV=1	P23368	0.9	0.7	0.75	0.875	0.8	0.818182	0.97
40S ribosomal protein S3 OS=Homo sapiens OX=9606 GN=RPS3 PE=1 SV=2	P23396	0.8	0.9	0.888889	0.818182	0.85	0.842105	0.97
DNA-(apurinic or apyrimidinic site) lyase OS=Homo sapiens OX=9606 GN=APEX1 PE=1 SV=2	P27695	0.9	0.9	0.9	0.9	0.9	0.9	0.97
Peptidyl-prolyl cis-trans isomerase F, mitochondrial OS=Homo sapiens OX=9606 GN=PPIF PE=1 SV=1	P30405	0.8	1	1	0.833333	0.9	0.888889	0.97
Cleavage stimulation factor subunit 2 OS=Homo sapiens OX=9606 GN=CSTF2 PE=1 SV=1	P33240	0.8	0.9	0.888889	0.818182	0.85	0.842105	0.97
ATP synthase subunit gamma, mitochondrial OS=Homo sapiens OX=9606 GN=ATP5F1C PE=1 SV=1	P36542	0.8	0.9	0.888889	0.818182	0.85	0.842105	0.97
Nuclear pore glycoprotein p62 OS=Homo sapiens OX=9606 GN=NUP62 PE=1 SV=3	P37198	0.9	0.8	0.818182	0.888889	0.85	0.857143	0.97
T-complex protein 1 subunit zeta OS=Homo sapiens OX=9606 GN=CCT6A PE=1 SV=3	P40227	0.9	0.8	0.818182	0.888889	0.85	0.857143	0.97
ADP-ribosylation factor-like protein 1 OS=Homo sapiens OX=9606 GN=ARL1 PE=1 SV=1	P40616	0.9	0.9	0.9	0.9	0.9	0.9	0.97
Isoleucine--tRNA ligase, cytoplasmic OS=Homo sapiens OX=9606 GN=IARS PE=1 SV=2	P41252	0.9	0.9	0.9	0.9	0.9	0.9	0.97
26S proteasome regulatory subunit 6B OS=Homo sapiens OX=9606 GN=PSMC4 PE=1 SV=2	P43686	0.8	0.9	0.888889	0.818182	0.85	0.842105	0.97
Chromobox protein homolog 5 OS=Homo sapiens OX=9606 GN=CBX5 PE=1 SV=1	P45973	0.9	1	1	0.909091	0.95	0.947368	0.97
Probable 28S rRNA (cytosine(4447)-C(5))-methyltransferase OS=Homo sapiens OX=9606 GN=NOP2 PE=1 SV=2	P46087	0.9	0.9	0.9	0.9	0.9	0.9	0.97
4-trimethylaminobutyraldehyde dehydrogenase OS=Homo sapiens OX=9606 GN=ALDH9A1 PE=1 SV=3	P49189	0.8	0.9	0.888889	0.818182	0.85	0.842105	0.97
Signal recognition particle 9 kDa protein OS=Homo sapiens OX=9606 GN=SRP9 PE=1 SV=2	P49458	0.9	1	1	0.909091	0.95	0.947368	0.97
Lumican OS=Homo sapiens OX=9606 GN=LUM PE=1 SV=2	P51884	1	0.7	0.769231	1	0.85	0.869565	0.97
Exportin-2 OS=Homo sapiens OX=9606 GN=CSE1L PE=1 SV=3	P55060	0.8	0.9	0.888889	0.818182	0.85	0.842105	0.97
Trifunctional enzyme subunit beta, mitochondrial OS=Homo sapiens OX=9606 GN=HADHB PE=1 SV=3	P55084	0.8	0.8	0.8	0.8	0.8	0.8	0.97
Eukaryotic translation initiation factor 3 subunit E OS=Homo sapiens OX=9606 GN=EIF3E PE=1 SV=1	P60228	0.9	0.9	0.9	0.9	0.9	0.9	0.97
Ubiquitin-conjugating enzyme E2 D3 OS=Homo sapiens OX=9606 GN=UBE2D3 PE=1 SV=1	P61077	1	0.8	0.833333	1	0.9	0.909091	0.97
26S proteasome regulatory subunit 4 OS=Homo sapiens OX=9606 GN=PSMC1 PE=1 SV=1	P62191	0.9	0.8	0.818182	0.888889	0.85	0.857143	0.97
Small nuclear ribonucleoprotein Sm D3 OS=Homo sapiens OX=9606 GN=SNRPD3 PE=1 SV=1	P62318	0.9	0.8	0.818182	0.888889	0.85	0.857143	0.97
40S ribosomal protein S4, X isoform OS=Homo sapiens OX=9606 GN=RPS4X PE=1 SV=2	P62701	0.8	0.9	0.888889	0.818182	0.85	0.842105	0.97
Eukaryotic translation initiation factor 5A-1 OS=Homo sapiens OX=9606 GN=EIF5A PE=1 SV=2	P63241	0.8	0.7	0.727273	0.777778	0.75	0.761905	0.97
Tubulin alpha-4A chain OS=Homo sapiens OX=9606 GN=TUBA4A PE=1 SV=1	P68366	0.9	1	1	0.909091	0.95	0.947368	0.97
Antigen peptide transporter 1 OS=Homo sapiens OX=9606 GN=TAP1 PE=1 SV=2	Q03518	0.9	1	1	0.909091	0.95	0.947368	0.97
Cadherin-17 OS=Homo sapiens OX=9606 GN=CDH17 PE=2 SV=3	Q12864	0.9	0.8	0.818182	0.888889	0.85	0.857143	0.97
Interleukin enhancer-binding factor 3 OS=Homo sapiens OX=9606 GN=ILF3 PE=1 SV=3	Q12906	0.8	0.9	0.888889	0.818182	0.85	0.842105	0.97
Serine/threonine-protein kinase PAK 2 OS=Homo sapiens OX=9606 GN=PAK2 PE=1 SV=3	Q13177	0.9	0.9	0.9	0.9	0.9	0.9	0.97
Treacle protein OS=Homo sapiens OX=9606 GN=TCOF1 PE=1 SV=3	Q13428	0.8	0.8	0.8	0.8	0.8	0.8	0.97
DNA replication licensing factor MCM6 OS=Homo sapiens OX=9606 GN=MCM6 PE=1 SV=1	Q14566	0.9	0.9	0.9	0.9	0.9	0.9	0.97
Platelet-activating factor acetylhydrolase IB subunit gamma OS=Homo sapiens OX=9606 GN=PAFAH1B3 PE=1 SV=1	Q15102	0.9	0.9	0.9	0.9	0.9	0.9	0.97
Inorganic pyrophosphatase OS=Homo sapiens OX=9606 GN=PPA1 PE=1 SV=2	Q15181	1	0.9	0.909091	1	0.95	0.952381	0.97
Poly(rC)-binding protein 2 OS=Homo sapiens OX=9606 GN=PCBP2 PE=1 SV=1	Q15366	0.8	1	1	0.833333	0.9	0.888889	0.97
2,4-dienoyl-CoA reductase, mitochondrial OS=Homo sapiens OX=9606 GN=DECR1 PE=1 SV=1	Q16698	1	0.7	0.769231	1	0.85	0.869565	0.97
Triokinase/FMN cyclase OS=Homo sapiens OX=9606 GN=TKFC PE=1 SV=2	Q3LXA3	0.7	1	1	0.769231	0.85	0.823529	0.97
Very-long-chain 3-oxoacyl-CoA reductase OS=Homo sapiens OX=9606 GN=HSD17B12 PE=1 SV=2	Q53GQ0	0.9	0.8	0.818182	0.888889	0.85	0.857143	0.97
Acylpyruvase FAHD1, mitochondrial OS=Homo sapiens OX=9606 GN=FAHD1 PE=1 SV=2	Q6P587	1	0.8	0.833333	1	0.9	0.909091	0.97
Hepatoma-derived growth factor-related protein 2 OS=Homo sapiens OX=9606 GN=HDGFL2 PE=1 SV=1	Q7Z4V5	0.8	0.8	0.8	0.8	0.8	0.8	0.97
Nuclear pore membrane glycoprotein 210 OS=Homo sapiens OX=9606 GN=NUP210 PE=1 SV=3	Q8TEM1	0.7	0.9	0.875	0.75	0.8	0.777778	0.97
PEST proteolytic signal-containing nuclear protein OS=Homo sapiens OX=9606 GN=PCNP PE=1 SV=2	Q8WW12	0.8	0.9	0.888889	0.818182	0.85	0.842105	0.97
Histone deacetylase 2 OS=Homo sapiens OX=9606 GN=HDAC2 PE=1 SV=2	Q92769	0.8	1	1	0.833333	0.9	0.888889	0.97
Probable ubiquitin carboxyl-terminal hydrolase FAF-X OS=Homo sapiens OX=9606 GN=USP9X PE=1 SV=3	Q93008	0.8	0.9	0.888889	0.818182	0.85	0.842105	0.97
Leucine-rich repeat-containing protein 59 OS=Homo sapiens OX=9606 GN=LRRC59 PE=1 SV=1	Q96AG4	0.9	0.9	0.9	0.9	0.9	0.9	0.97
m7GpppX diphosphatase OS=Homo sapiens OX=9606 GN=DCPS PE=1 SV=2	Q96C86	0.8	0.8	0.8	0.8	0.8	0.8	0.97
Serine/threonine-protein phosphatase PGAM5, mitochondrial OS=Homo sapiens OX=9606 GN=PGAM5 PE=1 SV=2	Q96HS1	0.9	0.9	0.9	0.9	0.9	0.9	0.97
Acidic leucine-rich nuclear phosphoprotein 32 family member E OS=Homo sapiens OX=9606 GN=ANP32E PE=1 SV=1	Q9BTT0	0.9	0.9	0.9	0.9	0.9	0.9	0.97
Prostaglandin E synthase 2 OS=Homo sapiens OX=9606 GN=PTGES2 PE=1 SV=1	Q9H7Z7	1	0.9	0.909091	1	0.95	0.952381	0.97
39S ribosomal protein L44, mitochondrial OS=Homo sapiens OX=9606 GN=MRPL44 PE=1 SV=1	Q9H9J2	0.9	0.9	0.9	0.9	0.9	0.9	0.97
Glyoxalase domain-containing protein 4 OS=Homo sapiens OX=9606 GN=GLOD4 PE=1 SV=1	Q9HC38	0.6	0.9	0.857143	0.692308	0.75	0.705882	0.97
Kinesin light chain 4 OS=Homo sapiens OX=9606 GN=KLC4 PE=1 SV=3	Q9NSK0	0.8	1	1	0.833333	0.9	0.888889	0.97
Protein lin-7 homolog C OS=Homo sapiens OX=9606 GN=LIN7C PE=1 SV=1	Q9NUP9	0.7	1	1	0.769231	0.85	0.823529	0.97
Huntingtin-interacting protein K OS=Homo sapiens OX=9606 GN=HYPK PE=1 SV=2	Q9NX55	0.7	0.8	0.777778	0.727273	0.75	0.736842	0.97
Tropomodulin-3 OS=Homo sapiens OX=9606 GN=TMOD3 PE=1 SV=1	Q9NYL9	0.7	1	1	0.769231	0.85	0.823529	0.97
Ras GTPase-activating protein-binding protein 2 OS=Homo sapiens OX=9606 GN=G3BP2 PE=1 SV=2	Q9UN86	0.8	0.9	0.888889	0.818182	0.85	0.842105	0.97
Peptidyl-prolyl cis-trans isomerase NIMA-interacting 4 OS=Homo sapiens OX=9606 GN=PIN4 PE=1 SV=1	Q9Y237	1	0.9	0.909091	1	0.95	0.952381	0.97
Voltage-dependent anion-selective channel protein 3 OS=Homo sapiens OX=9606 GN=VDAC3 PE=1 SV=1	Q9Y277	0.9	0.9	0.9	0.9	0.9	0.9	0.97
Protein SGT1 homolog OS=Homo sapiens OX=9606 GN=SUGT1 PE=1 SV=3	Q9Y2Z0	0.8	0.9	0.888889	0.818182	0.85	0.842105	0.97
Ras-related protein Rap-2c OS=Homo sapiens OX=9606 GN=RAP2C PE=1 SV=1	Q9Y3L5	0.7	0.9	0.875	0.75	0.8	0.777778	0.97
Peripheral plasma membrane protein CASK OS=Homo sapiens OX=9606 GN=CASK PE=1 SV=3	O14936	0.9	0.9	0.9	0.9	0.9	0.9	0.96
Exportin-1 OS=Homo sapiens OX=9606 GN=XPO1 PE=1 SV=1	O14980	0.8	0.8	0.8	0.8	0.8	0.8	0.96
Ubiquinone biosynthesis protein COQ9, mitochondrial OS=Homo sapiens OX=9606 GN=COQ9 PE=1 SV=1	O75208	0.8	0.8	0.8	0.8	0.8	0.8	0.96
Gamma-glutamylcyclotransferase OS=Homo sapiens OX=9606 GN=GGCT PE=1 SV=1	O75223	0.8	0.8	0.8	0.8	0.8	0.8	0.96
NADH dehydrogenase [ubiquinone] iron-sulfur protein 3, mitochondrial OS=Homo sapiens OX=9606 GN=NDUFS3 PE=1 SV=1	O75489	0.7	0.8	0.777778	0.727273	0.75	0.736842	0.96
CAAX prenyl protease 1 homolog OS=Homo sapiens OX=9606 GN=ZMPSTE24 PE=1 SV=2	O75844	0.7	0.9	0.875	0.75	0.8	0.777778	0.96
DnaJ homolog subfamily C member 8 OS=Homo sapiens OX=9606 GN=DNAJC8 PE=1 SV=2	O75937	0.8	0.9	0.888889	0.818182	0.85	0.842105	0.96
ATP synthase subunit g, mitochondrial OS=Homo sapiens OX=9606 GN=ATP5MG PE=1 SV=3	O75964	0.8	0.8	0.8	0.8	0.8	0.8	0.96
Aflatoxin B1 aldehyde reductase member 3 OS=Homo sapiens OX=9606 GN=AKR7A3 PE=1 SV=2	O95154	0.7	0.9	0.875	0.75	0.8	0.777778	0.96
Luc7-like protein 3 OS=Homo sapiens OX=9606 GN=LUC7L3 PE=1 SV=2	O95232	0.9	0.9	0.9	0.9	0.9	0.9	0.96
CUGBP Elav-like family member 2 OS=Homo sapiens OX=9606 GN=CELF2 PE=1 SV=1	O95319	0.8	1	1	0.833333	0.9	0.888889	0.96
Phosphoacetylglucosamine mutase OS=Homo sapiens OX=9606 GN=PGM3 PE=1 SV=1	O95394	0.8	0.7	0.727273	0.777778	0.75	0.761905	0.96
Polypyrimidine tract-binding protein 3 OS=Homo sapiens OX=9606 GN=PTBP3 PE=1 SV=2	O95758	0.9	0.8	0.818182	0.888889	0.85	0.857143	0.96
Apoptosis-inducing factor 1, mitochondrial OS=Homo sapiens OX=9606 GN=AIFM1 PE=1 SV=1	O95831	0.8	0.8	0.8	0.8	0.8	0.8	0.96
Phosphoglycerate kinase 1 OS=Homo sapiens OX=9606 GN=PGK1 PE=1 SV=3	P00558	0.8	0.9	0.888889	0.818182	0.85	0.842105	0.96
Polymeric immunoglobulin receptor OS=Homo sapiens OX=9606 GN=PIGR PE=1 SV=4	P01833	0.9	0.9	0.9	0.9	0.9	0.9	0.96
Cystatin-B OS=Homo sapiens OX=9606 GN=CSTB PE=1 SV=2	P04080	0.9	0.9	0.9	0.9	0.9	0.9	0.96
60S acidic ribosomal protein P0 OS=Homo sapiens OX=9606 GN=RPLP0 PE=1 SV=1	P05388	0.9	0.8	0.818182	0.888889	0.85	0.857143	0.96
40S ribosomal protein S17 OS=Homo sapiens OX=9606 GN=RPS17 PE=1 SV=2	P08708	0.7	0.8	0.777778	0.727273	0.75	0.736842	0.96
Glutathione S-transferase P OS=Homo sapiens OX=9606 GN=GSTP1 PE=1 SV=2	P09211	0.9	0.9	0.9	0.9	0.9	0.9	0.96
Galectin-1 OS=Homo sapiens OX=9606 GN=LGALS1 PE=1 SV=2	P09382	0.9	0.7	0.75	0.875	0.8	0.818182	0.96
Cytochrome c oxidase subunit 4 isoform 1, mitochondrial OS=Homo sapiens OX=9606 GN=COX4I1 PE=1 SV=1	P13073	0.8	0.7	0.727273	0.777778	0.75	0.761905	0.96
40S ribosomal protein S2 OS=Homo sapiens OX=9606 GN=RPS2 PE=1 SV=2	P15880	0.8	0.9	0.888889	0.818182	0.85	0.842105	0.96
CD44 antigen OS=Homo sapiens OX=9606 GN=CD44 PE=1 SV=3	P16070	0.9	0.8	0.818182	0.888889	0.85	0.857143	0.96
Dipeptidase 1 OS=Homo sapiens OX=9606 GN=DPEP1 PE=1 SV=3	P16444	0.9	0.9	0.9	0.9	0.9	0.9	0.96
Sarcoplasmic/endoplasmic reticulum calcium ATPase 2 OS=Homo sapiens OX=9606 GN=ATP2A2 PE=1 SV=1	P16615	0.8	0.9	0.888889	0.818182	0.85	0.842105	0.96
ATP synthase-coupling factor 6, mitochondrial OS=Homo sapiens OX=9606 GN=ATP5PF PE=1 SV=1	P18859	0.7	0.8	0.777778	0.727273	0.75	0.736842	0.96
Eukaryotic translation initiation factor 2 subunit 2 OS=Homo sapiens OX=9606 GN=EIF2S2 PE=1 SV=2	P20042	0.8	0.8	0.8	0.8	0.8	0.8	0.96
Lamin-B1 OS=Homo sapiens OX=9606 GN=LMNB1 PE=1 SV=2	P20700	0.8	0.9	0.888889	0.818182	0.85	0.842105	0.96
Integrin alpha-6 OS=Homo sapiens OX=9606 GN=ITGA6 PE=1 SV=5	P23229	0.8	0.8	0.8	0.8	0.8	0.8	0.96
Cofilin-1 OS=Homo sapiens OX=9606 GN=CFL1 PE=1 SV=3	P23528	0.7	0.8	0.777778	0.727273	0.75	0.736842	0.96
Acetyl-CoA acetyltransferase, mitochondrial OS=Homo sapiens OX=9606 GN=ACAT1 PE=1 SV=1	P24752	0.7	0.8	0.777778	0.727273	0.75	0.736842	0.96
ATP synthase subunit alpha, mitochondrial OS=Homo sapiens OX=9606 GN=ATP5F1A PE=1 SV=1	P25705	0.9	0.8	0.818182	0.888889	0.85	0.857143	0.96
Proteasome subunit alpha type-2 OS=Homo sapiens OX=9606 GN=PSMA2 PE=1 SV=2	P25787	0.8	0.8	0.8	0.8	0.8	0.8	0.96
Proteasome subunit alpha type-3 OS=Homo sapiens OX=9606 GN=PSMA3 PE=1 SV=2	P25788	0.8	0.9	0.888889	0.818182	0.85	0.842105	0.96
Splicing factor U2AF 65 kDa subunit OS=Homo sapiens OX=9606 GN=U2AF2 PE=1 SV=4	P26368	0.8	0.8	0.8	0.8	0.8	0.8	0.96
Mitogen-activated protein kinase 1 OS=Homo sapiens OX=9606 GN=MAPK1 PE=1 SV=3	P28482	0.9	0.8	0.818182	0.888889	0.85	0.857143	0.96
Delta-1-pyrroline-5-carboxylate dehydrogenase, mitochondrial OS=Homo sapiens OX=9606 GN=ALDH4A1 PE=1 SV=3	P30038	0.9	0.9	0.9	0.9	0.9	0.9	0.96
Kinesin-1 heavy chain OS=Homo sapiens OX=9606 GN=KIF5B PE=1 SV=1	P33176	0.9	0.6	0.692308	0.857143	0.75	0.782609	0.96
Deoxyuridine 5'-triphosphate nucleotidohydrolase, mitochondrial OS=Homo sapiens OX=9606 GN=DUT PE=1 SV=4	P33316	0.9	0.9	0.9	0.9	0.9	0.9	0.96
Lon protease homolog, mitochondrial OS=Homo sapiens OX=9606 GN=LONP1 PE=1 SV=2	P36776	0.9	0.9	0.9	0.9	0.9	0.9	0.96
Crk-like protein OS=Homo sapiens OX=9606 GN=CRKL PE=1 SV=1	P46109	0.8	0.8	0.8	0.8	0.8	0.8	0.96
Microtubule-associated protein 1B OS=Homo sapiens OX=9606 GN=MAP1B PE=1 SV=2	P46821	0.8	0.9	0.888889	0.818182	0.85	0.842105	0.96
Rab GDP dissociation inhibitor beta OS=Homo sapiens OX=9606 GN=GDI2 PE=1 SV=2	P50395	0.8	0.8	0.8	0.8	0.8	0.8	0.96
Hsc70-interacting protein OS=Homo sapiens OX=9606 GN=ST13 PE=1 SV=2	P50502	0.6	0.9	0.857143	0.692308	0.75	0.705882	0.96
Heterogeneous nuclear ribonucleoprotein A3 OS=Homo sapiens OX=9606 GN=HNRNPA3 PE=1 SV=2	P51991	0.8	0.8	0.8	0.8	0.8	0.8	0.96
ATP-citrate synthase OS=Homo sapiens OX=9606 GN=ACLY PE=1 SV=3	P53396	0.8	1	1	0.833333	0.9	0.888889	0.96
Tyrosine--tRNA ligase, cytoplasmic OS=Homo sapiens OX=9606 GN=YARS PE=1 SV=4	P54577	0.9	1	1	0.909091	0.95	0.947368	0.96
Tumor protein D52 OS=Homo sapiens OX=9606 GN=TPD52 PE=1 SV=2	P55327	0.8	1	1	0.833333	0.9	0.888889	0.96
Heterogeneous nuclear ribonucleoprotein H2 OS=Homo sapiens OX=9606 GN=HNRNPH2 PE=1 SV=1	P55795	0.8	0.9	0.888889	0.818182	0.85	0.842105	0.96
Eukaryotic initiation factor 4A-I OS=Homo sapiens OX=9606 GN=EIF4A1 PE=1 SV=1	P60842	0.8	1	1	0.833333	0.9	0.888889	0.96
40S ribosomal protein S20 OS=Homo sapiens OX=9606 GN=RPS20 PE=1 SV=1	P60866	0.9	1	1	0.909091	0.95	0.947368	0.96
Ubiquitin-conjugating enzyme E2 K OS=Homo sapiens OX=9606 GN=UBE2K PE=1 SV=3	P61086	0.9	0.9	0.9	0.9	0.9	0.9	0.96
ADP-ribosylation factor 3 OS=Homo sapiens OX=9606 GN=ARF3 PE=1 SV=2	P61204	0.8	0.9	0.888889	0.818182	0.85	0.842105	0.96
40S ribosomal protein S16 OS=Homo sapiens OX=9606 GN=RPS16 PE=1 SV=2	P62249	0.9	0.9	0.9	0.9	0.9	0.9	0.96
40S ribosomal protein S23 OS=Homo sapiens OX=9606 GN=RPS23 PE=1 SV=3	P62266	0.9	0.7	0.75	0.875	0.8	0.818182	0.96
AP-2 complex subunit beta OS=Homo sapiens OX=9606 GN=AP2B1 PE=1 SV=1	P63010	0.6	1	1	0.714286	0.8	0.75	0.96
40S ribosomal protein S21 OS=Homo sapiens OX=9606 GN=RPS21 PE=1 SV=1	P63220	0.9	1	1	0.909091	0.95	0.947368	0.96
Receptor of activated protein C kinase 1 OS=Homo sapiens OX=9606 GN=RACK1 PE=1 SV=3	P63244	0.9	0.8	0.818182	0.888889	0.85	0.857143	0.96
SUMO-conjugating enzyme UBC9 OS=Homo sapiens OX=9606 GN=UBE2I PE=1 SV=1	P63279	0.9	0.9	0.9	0.9	0.9	0.9	0.96
Elongation factor 1-alpha 1 OS=Homo sapiens OX=9606 GN=EEF1A1 PE=1 SV=1	P68104	0.8	0.8	0.8	0.8	0.8	0.8	0.96
Protein SET OS=Homo sapiens OX=9606 GN=SET PE=1 SV=3	Q01105	0.8	0.9	0.888889	0.818182	0.85	0.842105	0.96
Serine/arginine-rich splicing factor 2 OS=Homo sapiens OX=9606 GN=SRSF2 PE=1 SV=4	Q01130	0.8	0.9	0.888889	0.818182	0.85	0.842105	0.96
Proteasome activator complex subunit 1 OS=Homo sapiens OX=9606 GN=PSME1 PE=1 SV=1	Q06323	0.8	0.9	0.888889	0.818182	0.85	0.842105	0.96
5'-AMP-activated protein kinase catalytic subunit alpha-1 OS=Homo sapiens OX=9606 GN=PRKAA1 PE=1 SV=4	Q13131	0.7	0.9	0.875	0.75	0.8	0.777778	0.96
TAR DNA-binding protein 43 OS=Homo sapiens OX=9606 GN=TARDBP PE=1 SV=1	Q13148	0.8	0.9	0.888889	0.818182	0.85	0.842105	0.96
39S ribosomal protein L49, mitochondrial OS=Homo sapiens OX=9606 GN=MRPL49 PE=1 SV=1	Q13405	0.8	1	1	0.833333	0.9	0.888889	0.96
Sequestosome-1 OS=Homo sapiens OX=9606 GN=SQSTM1 PE=1 SV=1	Q13501	0.8	0.9	0.888889	0.818182	0.85	0.842105	0.96
Plastin-1 OS=Homo sapiens OX=9606 GN=PLS1 PE=1 SV=2	Q14651	0.9	0.8	0.818182	0.888889	0.85	0.857143	0.96
Major vault protein OS=Homo sapiens OX=9606 GN=MVP PE=1 SV=4	Q14764	0.8	0.9	0.888889	0.818182	0.85	0.842105	0.96
LIM and SH3 domain protein 1 OS=Homo sapiens OX=9606 GN=LASP1 PE=1 SV=2	Q14847	0.8	0.8	0.8	0.8	0.8	0.8	0.96
DNA damage-binding protein 1 OS=Homo sapiens OX=9606 GN=DDB1 PE=1 SV=1	Q16531	0.8	0.9	0.888889	0.818182	0.85	0.842105	0.96
Histone-binding protein RBBP7 OS=Homo sapiens OX=9606 GN=RBBP7 PE=1 SV=1	Q16576	0.5	0.9	0.833333	0.642857	0.7	0.625	0.96
Tubulin alpha-1A chain OS=Homo sapiens OX=9606 GN=TUBA1A PE=1 SV=1	Q71U36	0.7	0.8	0.777778	0.727273	0.75	0.736842	0.96
Myosin-14 OS=Homo sapiens OX=9606 GN=MYH14 PE=1 SV=2	Q7Z406	0.9	0.9	0.9	0.9	0.9	0.9	0.96
Leucine-rich repeat-containing protein 47 OS=Homo sapiens OX=9606 GN=LRRC47 PE=1 SV=1	Q8N1G4	0.8	0.9	0.888889	0.818182	0.85	0.842105	0.96
Coiled-coil domain-containing protein 47 OS=Homo sapiens OX=9606 GN=CCDC47 PE=1 SV=1	Q96A33	0.8	0.8	0.8	0.8	0.8	0.8	0.96
Far upstream element-binding protein 1 OS=Homo sapiens OX=9606 GN=FUBP1 PE=1 SV=3	Q96AE4	0.8	0.9	0.888889	0.818182	0.85	0.842105	0.96
Phosphoglucomutase-2 OS=Homo sapiens OX=9606 GN=PGM2 PE=1 SV=4	Q96G03	0.8	0.8	0.8	0.8	0.8	0.8	0.96
ERO1-like protein alpha OS=Homo sapiens OX=9606 GN=ERO1A PE=1 SV=2	Q96HE7	0.9	0.9	0.9	0.9	0.9	0.9	0.96
Eukaryotic translation initiation factor 3 subunit C OS=Homo sapiens OX=9606 GN=EIF3C PE=1 SV=1	Q99613	0.8	0.9	0.888889	0.818182	0.85	0.842105	0.96
Methylosome protein 50 OS=Homo sapiens OX=9606 GN=WDR77 PE=1 SV=1	Q9BQA1	0.7	0.9	0.875	0.75	0.8	0.777778	0.96
Vacuolar protein-sorting-associated protein 25 OS=Homo sapiens OX=9606 GN=VPS25 PE=1 SV=1	Q9BRG1	0.8	0.9	0.888889	0.818182	0.85	0.842105	0.96
Peroxiredoxin-like 2A OS=Homo sapiens OX=9606 GN=PRXL2A PE=1 SV=3	Q9BRX8	0.8	0.8	0.8	0.8	0.8	0.8	0.96
Acetyl-CoA acetyltransferase, cytosolic OS=Homo sapiens OX=9606 GN=ACAT2 PE=1 SV=2	Q9BWD1	0.8	0.8	0.8	0.8	0.8	0.8	0.96
Splicing factor 3B subunit 5 OS=Homo sapiens OX=9606 GN=SF3B5 PE=1 SV=1	Q9BWJ5	0.9	0.9	0.9	0.9	0.9	0.9	0.96
Haloacid dehalogenase-like hydrolase domain-containing 5 OS=Homo sapiens OX=9606 GN=HDHD5 PE=1 SV=1	Q9BXW7	0.8	0.9	0.888889	0.818182	0.85	0.842105	0.96
Aminopeptidase B OS=Homo sapiens OX=9606 GN=RNPEP PE=1 SV=2	Q9H4A4	0.8	0.8	0.8	0.8	0.8	0.8	0.96
Serine--tRNA ligase, mitochondrial OS=Homo sapiens OX=9606 GN=SARS2 PE=1 SV=1	Q9NP81	0.8	1	1	0.833333	0.9	0.888889	0.96
Complement C1r subcomponent-like protein OS=Homo sapiens OX=9606 GN=C1RL PE=1 SV=2	Q9NZP8	0.8	0.8	0.8	0.8	0.8	0.8	0.96
Enolase-phosphatase E1 OS=Homo sapiens OX=9606 GN=ENOPH1 PE=1 SV=1	Q9UHY7	0.8	0.9	0.888889	0.818182	0.85	0.842105	0.96
Drebrin-like protein OS=Homo sapiens OX=9606 GN=DBNL PE=1 SV=1	Q9UJU6	0.7	0.9	0.875	0.75	0.8	0.777778	0.96
ADP-sugar pyrophosphatase OS=Homo sapiens OX=9606 GN=NUDT5 PE=1 SV=1	Q9UKK9	0.7	1	1	0.769231	0.85	0.823529	0.96
RNA-binding protein Raly OS=Homo sapiens OX=9606 GN=RALY PE=1 SV=1	Q9UKM9	0.8	0.8	0.8	0.8	0.8	0.8	0.96
26S proteasome non-ATPase regulatory subunit 13 OS=Homo sapiens OX=9606 GN=PSMD13 PE=1 SV=2	Q9UNM6	0.8	0.8	0.8	0.8	0.8	0.8	0.96
Calcium-binding protein 39 OS=Homo sapiens OX=9606 GN=CAB39 PE=1 SV=1	Q9Y376	0.6	0.9	0.857143	0.692308	0.75	0.705882	0.96
Ubiquitin carboxyl-terminal hydrolase isozyme L5 OS=Homo sapiens OX=9606 GN=UCHL5 PE=1 SV=3	Q9Y5K5	0.8	0.9	0.888889	0.818182	0.85	0.842105	0.96
Sorting nexin-5 OS=Homo sapiens OX=9606 GN=SNX5 PE=1 SV=1	Q9Y5X3	0.8	0.8	0.8	0.8	0.8	0.8	0.96
Apoptotic chromatin condensation inducer in the nucleus OS=Homo sapiens OX=9606 GN=ACIN1 PE=1 SV=2	Q9UKV3	0.7	1	1	0.769231	0.85	0.823529	0.96
von Willebrand factor A domain-containing protein 5A OS=Homo sapiens OX=9606 GN=VWA5A PE=2 SV=2	O00534	0.8	0.9	0.888889	0.818182	0.85	0.842105	0.95
Protein arginine N-methyltransferase 5 OS=Homo sapiens OX=9606 GN=PRMT5 PE=1 SV=4	O14744	0.7	0.9	0.875	0.75	0.8	0.777778	0.95
Mitotic checkpoint protein BUB3 OS=Homo sapiens OX=9606 GN=BUB3 PE=1 SV=1	O43684	0.8	0.9	0.888889	0.818182	0.85	0.842105	0.95
Asparagine--tRNA ligase, cytoplasmic OS=Homo sapiens OX=9606 GN=NARS PE=1 SV=1	O43776	0.9	0.7	0.75	0.875	0.8	0.818182	0.95
Endothelial differentiation-related factor 1 OS=Homo sapiens OX=9606 GN=EDF1 PE=1 SV=1	O60869	0.8	0.9	0.888889	0.818182	0.85	0.842105	0.95
Eukaryotic translation initiation factor 3 subunit G OS=Homo sapiens OX=9606 GN=EIF3G PE=1 SV=2	O75821	0.8	0.6	0.666667	0.75	0.7	0.727273	0.95
ATP synthase subunit d, mitochondrial OS=Homo sapiens OX=9606 GN=ATP5PD PE=1 SV=3	O75947	0.8	0.9	0.888889	0.818182	0.85	0.842105	0.95
Argininosuccinate synthase OS=Homo sapiens OX=9606 GN=ASS1 PE=1 SV=2	P00966	0.8	0.8	0.8	0.8	0.8	0.8	0.95
HLA class I histocompatibility antigen, A-3 alpha chain OS=Homo sapiens OX=9606 GN=HLA-A PE=1 SV=2	P04439	0.7	0.9	0.875	0.75	0.8	0.777778	0.95
Eukaryotic translation initiation factor 2 subunit 1 OS=Homo sapiens OX=9606 GN=EIF2S1 PE=1 SV=3	P05198	0.8	0.9	0.888889	0.818182	0.85	0.842105	0.95
60S acidic ribosomal protein P2 OS=Homo sapiens OX=9606 GN=RPLP2 PE=1 SV=1	P05387	0.8	0.9	0.888889	0.818182	0.85	0.842105	0.95
Prothymosin alpha OS=Homo sapiens OX=9606 GN=PTMA PE=1 SV=2	P06454	0.9	0.9	0.9	0.9	0.9	0.9	0.95
Cyclin-dependent kinase 1 OS=Homo sapiens OX=9606 GN=CDK1 PE=1 SV=3	P06493	0.9	0.9	0.9	0.9	0.9	0.9	0.95
4F2 cell-surface antigen heavy chain OS=Homo sapiens OX=9606 GN=SLC3A2 PE=1 SV=3	P08195	0.8	0.8	0.8	0.8	0.8	0.8	0.95
Fructose-1,6-bisphosphatase 1 OS=Homo sapiens OX=9606 GN=FBP1 PE=1 SV=5	P09467	0.9	0.9	0.9	0.9	0.9	0.9	0.95
DNA topoisomerase 1 OS=Homo sapiens OX=9606 GN=TOP1 PE=1 SV=2	P11387	0.8	0.9	0.888889	0.818182	0.85	0.842105	0.95
Creatine kinase U-type, mitochondrial OS=Homo sapiens OX=9606 GN=CKMT1A PE=1 SV=1	P12532	0.8	0.8	0.8	0.8	0.8	0.8	0.95
Macrophage migration inhibitory factor OS=Homo sapiens OX=9606 GN=MIF PE=1 SV=4	P14174	0.9	0.9	0.9	0.9	0.9	0.9	0.95
Histone H1.5 OS=Homo sapiens OX=9606 GN=HIST1H1B PE=1 SV=3	P16401	0.7	0.9	0.875	0.75	0.8	0.777778	0.95
Regulator of chromosome condensation OS=Homo sapiens OX=9606 GN=RCC1 PE=1 SV=1	P18754	0.8	0.8	0.8	0.8	0.8	0.8	0.95
Low molecular weight phosphotyrosine protein phosphatase OS=Homo sapiens OX=9606 GN=ACP1 PE=1 SV=3	P24666	0.8	0.8	0.8	0.8	0.8	0.8	0.95
40S ribosomal protein S12 OS=Homo sapiens OX=9606 GN=RPS12 PE=1 SV=3	P25398	0.9	0.9	0.9	0.9	0.9	0.9	0.95
Proteasome subunit alpha type-4 OS=Homo sapiens OX=9606 GN=PSMA4 PE=1 SV=1	P25789	0.8	0.8	0.8	0.8	0.8	0.8	0.95
Isovaleryl-CoA dehydrogenase, mitochondrial OS=Homo sapiens OX=9606 GN=IVD PE=1 SV=2	P26440	0.8	0.9	0.888889	0.818182	0.85	0.842105	0.95
Cytosol aminopeptidase OS=Homo sapiens OX=9606 GN=LAP3 PE=1 SV=3	P28838	0.8	1	1	0.833333	0.9	0.888889	0.95
60S ribosomal protein L12 OS=Homo sapiens OX=9606 GN=RPL12 PE=1 SV=1	P30050	0.9	0.9	0.9	0.9	0.9	0.9	0.95
Pyrroline-5-carboxylate reductase 1, mitochondrial OS=Homo sapiens OX=9606 GN=PYCR1 PE=1 SV=2	P32322	0.8	0.9	0.888889	0.818182	0.85	0.842105	0.95
60S ribosomal protein L22 OS=Homo sapiens OX=9606 GN=RPL22 PE=1 SV=2	P35268	0.9	0.9	0.9	0.9	0.9	0.9	0.95
Transaldolase OS=Homo sapiens OX=9606 GN=TALDO1 PE=1 SV=2	P37837	0.8	0.9	0.888889	0.818182	0.85	0.842105	0.95
60S ribosomal protein L3 OS=Homo sapiens OX=9606 GN=RPL3 PE=1 SV=2	P39023	0.8	0.9	0.888889	0.818182	0.85	0.842105	0.95
Eukaryotic translation initiation factor 1A, X-chromosomal OS=Homo sapiens OX=9606 GN=EIF1AX PE=1 SV=2	P47813	0.8	0.9	0.888889	0.818182	0.85	0.842105	0.95
26S proteasome non-ATPase regulatory subunit 8 OS=Homo sapiens OX=9606 GN=PSMD8 PE=1 SV=2	P48556	0.5	0.8	0.714286	0.615385	0.65	0.588235	0.95
Isocitrate dehydrogenase [NADP], mitochondrial OS=Homo sapiens OX=9606 GN=IDH2 PE=1 SV=2	P48735	0.8	0.9	0.888889	0.818182	0.85	0.842105	0.95
Paxillin OS=Homo sapiens OX=9606 GN=PXN PE=1 SV=3	P49023	0.9	0.7	0.75	0.875	0.8	0.818182	0.95
Serine--tRNA ligase, cytoplasmic OS=Homo sapiens OX=9606 GN=SARS PE=1 SV=3	P49591	0.8	1	1	0.833333	0.9	0.888889	0.95
Proteasome subunit beta type-3 OS=Homo sapiens OX=9606 GN=PSMB3 PE=1 SV=2	P49720	0.8	0.8	0.8	0.8	0.8	0.8	0.95
Proteasome subunit beta type-2 OS=Homo sapiens OX=9606 GN=PSMB2 PE=1 SV=1	P49721	0.8	1	1	0.833333	0.9	0.888889	0.95
Isocitrate dehydrogenase [NAD] subunit alpha, mitochondrial OS=Homo sapiens OX=9606 GN=IDH3A PE=1 SV=1	P50213	0.7	0.8	0.777778	0.727273	0.75	0.736842	0.95
Bis(5'-nucleosyl)-tetraphosphatase [asymmetrical] OS=Homo sapiens OX=9606 GN=NUDT2 PE=1 SV=3	P50583	0.9	0.9	0.9	0.9	0.9	0.9	0.95
Arfaptin-1 OS=Homo sapiens OX=9606 GN=ARFIP1 PE=1 SV=2	P53367	0.9	1	1	0.909091	0.95	0.947368	0.95
IST1 homolog OS=Homo sapiens OX=9606 GN=IST1 PE=1 SV=1	P53990	0.6	0.9	0.857143	0.692308	0.75	0.705882	0.95
Transitional endoplasmic reticulum ATPase OS=Homo sapiens OX=9606 GN=VCP PE=1 SV=4	P55072	0.8	0.6	0.666667	0.75	0.7	0.727273	0.95
Triosephosphate isomerase OS=Homo sapiens OX=9606 GN=TPI1 PE=1 SV=3	P60174	0.8	0.7	0.727273	0.777778	0.75	0.761905	0.95
60S ribosomal protein L27 OS=Homo sapiens OX=9606 GN=RPL27 PE=1 SV=2	P61353	0.7	0.9	0.875	0.75	0.8	0.777778	0.95
40S ribosomal protein S13 OS=Homo sapiens OX=9606 GN=RPS13 PE=1 SV=2	P62277	0.8	0.9	0.888889	0.818182	0.85	0.842105	0.95
Cellular nucleic acid-binding protein OS=Homo sapiens OX=9606 GN=CNBP PE=1 SV=1	P62633	0.9	0.9	0.9	0.9	0.9	0.9	0.95
60S ribosomal protein L30 OS=Homo sapiens OX=9606 GN=RPL30 PE=1 SV=2	P62888	0.9	1	1	0.909091	0.95	0.947368	0.95
60S ribosomal protein L10a OS=Homo sapiens OX=9606 GN=RPL10A PE=1 SV=2	P62906	0.8	0.7	0.727273	0.777778	0.75	0.761905	0.95
60S ribosomal protein L11 OS=Homo sapiens OX=9606 GN=RPL11 PE=1 SV=2	P62913	0.8	0.9	0.888889	0.818182	0.85	0.842105	0.95
Enhancer of rudimentary homolog OS=Homo sapiens OX=9606 GN=ERH PE=1 SV=1	P84090	0.8	0.9	0.888889	0.818182	0.85	0.842105	0.95
Cyclin-dependent-like kinase 5 OS=Homo sapiens OX=9606 GN=CDK5 PE=1 SV=3	Q00535	0.6	0.9	0.857143	0.692308	0.75	0.705882	0.95
Peptidyl-prolyl cis-trans isomerase FKBP4 OS=Homo sapiens OX=9606 GN=FKBP4 PE=1 SV=3	Q02790	0.7	0.9	0.875	0.75	0.8	0.777778	0.95
DNA topoisomerase 2-beta OS=Homo sapiens OX=9606 GN=TOP2B PE=1 SV=3	Q02880	0.8	0.9	0.888889	0.818182	0.85	0.842105	0.95
Antigen peptide transporter 2 OS=Homo sapiens OX=9606 GN=TAP2 PE=1 SV=1	Q03519	0.8	0.9	0.888889	0.818182	0.85	0.842105	0.95
tRNA (cytosine(34)-C(5))-methyltransferase OS=Homo sapiens OX=9606 GN=NSUN2 PE=1 SV=2	Q08J23	0.7	0.9	0.875	0.75	0.8	0.777778	0.95
Eukaryotic translation initiation factor 3 subunit I OS=Homo sapiens OX=9606 GN=EIF3I PE=1 SV=1	Q13347	0.9	0.9	0.9	0.9	0.9	0.9	0.95
Mannosyl-oligosaccharide glucosidase OS=Homo sapiens OX=9606 GN=MOGS PE=1 SV=5	Q13724	0.6	0.9	0.857143	0.692308	0.75	0.705882	0.95
Ubiquitin-associated protein 2-like OS=Homo sapiens OX=9606 GN=UBAP2L PE=1 SV=2	Q14157	0.8	0.9	0.888889	0.818182	0.85	0.842105	0.95
Caprin-1 OS=Homo sapiens OX=9606 GN=CAPRIN1 PE=1 SV=2	Q14444	0.9	0.9	0.9	0.9	0.9	0.9	0.95
WD repeat-containing protein 43 OS=Homo sapiens OX=9606 GN=WDR43 PE=1 SV=3	Q15061	0.9	1	1	0.909091	0.95	0.947368	0.95
Laminin subunit alpha-4 OS=Homo sapiens OX=9606 GN=LAMA4 PE=1 SV=4	Q16363	0.9	0.7	0.75	0.875	0.8	0.818182	0.95
NADH dehydrogenase [ubiquinone] 1 alpha subcomplex subunit 5 OS=Homo sapiens OX=9606 GN=NDUFA5 PE=1 SV=3	Q16718	0.9	0.9	0.9	0.9	0.9	0.9	0.95
Thiosulfate sulfurtransferase OS=Homo sapiens OX=9606 GN=TST PE=1 SV=4	Q16762	0.9	0.9	0.9	0.9	0.9	0.9	0.95
Heterogeneous nuclear ribonucleoprotein U-like protein 2 OS=Homo sapiens OX=9606 GN=HNRNPUL2 PE=1 SV=1	Q1KMD3	0.7	0.9	0.875	0.75	0.8	0.777778	0.95
Pyrroline-5-carboxylate reductase 3 OS=Homo sapiens OX=9606 GN=PYCR3 PE=1 SV=3	Q53H96	0.7	0.9	0.875	0.75	0.8	0.777778	0.95
Nicotinate phosphoribosyltransferase OS=Homo sapiens OX=9606 GN=NAPRT PE=1 SV=2	Q6XQN6	0.8	0.9	0.888889	0.818182	0.85	0.842105	0.95
Glycerol-3-phosphate dehydrogenase 1-like protein OS=Homo sapiens OX=9606 GN=GPD1L PE=1 SV=1	Q8N335	0.8	0.8	0.8	0.8	0.8	0.8	0.95
ER membrane protein complex subunit 1 OS=Homo sapiens OX=9606 GN=EMC1 PE=1 SV=1	Q8N766	0.8	0.9	0.888889	0.818182	0.85	0.842105	0.95
Saccharopine dehydrogenase-like oxidoreductase OS=Homo sapiens OX=9606 GN=SCCPDH PE=1 SV=1	Q8NBX0	0.9	0.8	0.818182	0.888889	0.85	0.857143	0.95
Nuclear pore complex protein Nup133 OS=Homo sapiens OX=9606 GN=NUP133 PE=1 SV=2	Q8WUM0	0.9	1	1	0.909091	0.95	0.947368	0.95
Mas-related G-protein coupled receptor member F OS=Homo sapiens OX=9606 GN=MRGPRF PE=2 SV=1	Q96AM1	0.9	0.6	0.692308	0.857143	0.75	0.782609	0.95
Coiled-coil domain-containing protein 124 OS=Homo sapiens OX=9606 GN=CCDC124 PE=1 SV=1	Q96CT7	0.9	0.9	0.9	0.9	0.9	0.9	0.95
Ubiquitin thioesterase OTUB1 OS=Homo sapiens OX=9606 GN=OTUB1 PE=1 SV=2	Q96FW1	0.8	0.9	0.888889	0.818182	0.85	0.842105	0.95
Transcriptional activator protein Pur-beta OS=Homo sapiens OX=9606 GN=PURB PE=1 SV=3	Q96QR8	0.8	0.8	0.8	0.8	0.8	0.8	0.95
Cell division cycle 5-like protein OS=Homo sapiens OX=9606 GN=CDC5L PE=1 SV=2	Q99459	0.7	0.9	0.875	0.75	0.8	0.777778	0.95
UPF0160 protein MYG1, mitochondrial OS=Homo sapiens OX=9606 GN=C12orf10 PE=1 SV=2	Q9HB07	0.9	0.8	0.818182	0.888889	0.85	0.857143	0.95
Echinoderm microtubule-associated protein-like 4 OS=Homo sapiens OX=9606 GN=EML4 PE=1 SV=3	Q9HC35	0.9	0.9	0.9	0.9	0.9	0.9	0.95
Acetyl-coenzyme A synthetase, cytoplasmic OS=Homo sapiens OX=9606 GN=ACSS2 PE=1 SV=1	Q9NR19	0.5	0.8	0.714286	0.615385	0.65	0.588235	0.95
Alpha-methylacyl-CoA racemase OS=Homo sapiens OX=9606 GN=AMACR PE=1 SV=2	Q9UHK6	0.8	1	1	0.833333	0.9	0.888889	0.95
NADH dehydrogenase [ubiquinone] 1 alpha subcomplex subunit 12 OS=Homo sapiens OX=9606 GN=NDUFA12 PE=1 SV=1	Q9UI09	0.7	0.9	0.875	0.75	0.8	0.777778	0.95
U6 snRNA-associated Sm-like protein LSm7 OS=Homo sapiens OX=9606 GN=LSM7 PE=1 SV=1	Q9UK45	0.8	0.8	0.8	0.8	0.8	0.8	0.95
Unconventional myosin-VI OS=Homo sapiens OX=9606 GN=MYO6 PE=1 SV=4	Q9UM54	0.9	0.9	0.9	0.9	0.9	0.9	0.95
Proliferation-associated protein 2G4 OS=Homo sapiens OX=9606 GN=PA2G4 PE=1 SV=3	Q9UQ80	0.8	0.9	0.888889	0.818182	0.85	0.842105	0.95
Developmentally-regulated GTP-binding protein 1 OS=Homo sapiens OX=9606 GN=DRG1 PE=1 SV=1	Q9Y295	0.8	0.9	0.888889	0.818182	0.85	0.842105	0.95
Sulfide:quinone oxidoreductase, mitochondrial OS=Homo sapiens OX=9606 GN=SQOR PE=1 SV=1	Q9Y6N5	0.7	1	1	0.769231	0.85	0.823529	0.95
Secretory carrier-associated membrane protein 3 OS=Homo sapiens OX=9606 GN=SCAMP3 PE=1 SV=3	O14828	0.7	0.9	0.875	0.75	0.8	0.777778	0.95
Corticosteroid 11-beta-dehydrogenase isozyme 2 OS=Homo sapiens OX=9606 GN=HSD11B2 PE=1 SV=2	P80365	0.7	0.9	0.875	0.75	0.8	0.777778	0.95
Ubiquitin recognition factor in ER-associated degradation protein 1 OS=Homo sapiens OX=9606 GN=UFD1 PE=1 SV=3	Q92890	0.9	0.9	0.9	0.9	0.9	0.9	0.95
Protein phosphatase methylesterase 1 OS=Homo sapiens OX=9606 GN=PPME1 PE=1 SV=3	Q9Y570	0.7	0.9	0.875	0.75	0.8	0.777778	0.95
RNA-binding protein 47 OS=Homo sapiens OX=9606 GN=RBM47 PE=1 SV=2	A0AV96	0.9	0.9	0.9	0.9	0.9	0.9	0.945
Sorting nexin-3 OS=Homo sapiens OX=9606 GN=SNX3 PE=1 SV=3	O60493	0.6	0.8	0.75	0.666667	0.7	0.666667	0.94
Prefoldin subunit 1 OS=Homo sapiens OX=9606 GN=PFDN1 PE=1 SV=2	O60925	0.8	0.8	0.8	0.8	0.8	0.8	0.94
Serine/arginine-rich splicing factor 10 OS=Homo sapiens OX=9606 GN=SRSF10 PE=1 SV=1	O75494	0.7	0.8	0.777778	0.727273	0.75	0.736842	0.94
NADH dehydrogenase [ubiquinone] 1 beta subcomplex subunit 8, mitochondrial OS=Homo sapiens OX=9606 GN=NDUFB8 PE=1 SV=1	O95169	0.9	0.9	0.9	0.9	0.9	0.9	0.94
Fibronectin OS=Homo sapiens OX=9606 GN=FN1 PE=1 SV=4	P02751	0.7	0.8	0.777778	0.727273	0.75	0.736842	0.94
Sodium/potassium-transporting ATPase subunit beta-1 OS=Homo sapiens OX=9606 GN=ATP1B1 PE=1 SV=1	P05026	0.7	0.8	0.777778	0.727273	0.75	0.736842	0.94
Tubulin beta chain OS=Homo sapiens OX=9606 GN=TUBB PE=1 SV=2	P07437	0.7	0.9	0.875	0.75	0.8	0.777778	0.94
U1 small nuclear ribonucleoprotein A OS=Homo sapiens OX=9606 GN=SNRPA PE=1 SV=3	P09012	0.7	0.9	0.875	0.75	0.8	0.777778	0.94
Alpha-actinin-1 OS=Homo sapiens OX=9606 GN=ACTN1 PE=1 SV=2	P12814	0.8	0.8	0.8	0.8	0.8	0.8	0.94
Ubiquitin carboxyl-terminal hydrolase isozyme L3 OS=Homo sapiens OX=9606 GN=UCHL3 PE=1 SV=1	P15374	0.8	0.8	0.8	0.8	0.8	0.8	0.94
Replication protein A 32 kDa subunit OS=Homo sapiens OX=9606 GN=RPA2 PE=1 SV=1	P15927	0.8	0.9	0.888889	0.818182	0.85	0.842105	0.94
60S ribosomal protein L10 OS=Homo sapiens OX=9606 GN=RPL10 PE=1 SV=4	P27635	0.8	0.8	0.8	0.8	0.8	0.8	0.94
ATP synthase subunit delta, mitochondrial OS=Homo sapiens OX=9606 GN=ATP5F1D PE=1 SV=2	P30049	0.9	0.7	0.75	0.875	0.8	0.818182	0.94
HLA class I histocompatibility antigen, Cw-4 alpha chain OS=Homo sapiens OX=9606 GN=HLA-C PE=1 SV=1	P30504	0.6	0.9	0.857143	0.692308	0.75	0.705882	0.94
26S proteasome regulatory subunit 7 OS=Homo sapiens OX=9606 GN=PSMC2 PE=1 SV=3	P35998	0.8	0.9	0.888889	0.818182	0.85	0.842105	0.94
Transgelin-2 OS=Homo sapiens OX=9606 GN=TAGLN2 PE=1 SV=3	P37802	0.6	0.8	0.75	0.666667	0.7	0.666667	0.94
Electron transfer flavoprotein subunit beta OS=Homo sapiens OX=9606 GN=ETFB PE=1 SV=3	P38117	0.7	1	1	0.769231	0.85	0.823529	0.94
40S ribosomal protein S19 OS=Homo sapiens OX=9606 GN=RPS19 PE=1 SV=2	P39019	0.8	0.9	0.888889	0.818182	0.85	0.842105	0.94
Flap endonuclease 1 OS=Homo sapiens OX=9606 GN=FEN1 PE=1 SV=1	P39748	0.9	1	1	0.909091	0.95	0.947368	0.94
Tyrosine-protein kinase CSK OS=Homo sapiens OX=9606 GN=CSK PE=1 SV=1	P41240	0.7	0.9	0.875	0.75	0.8	0.777778	0.94
3-ketoacyl-CoA thiolase, mitochondrial OS=Homo sapiens OX=9606 GN=ACAA2 PE=1 SV=2	P42765	0.8	0.7	0.727273	0.777778	0.75	0.761905	0.94
Nuclear autoantigenic sperm protein OS=Homo sapiens OX=9606 GN=NASP PE=1 SV=2	P49321	0.9	0.9	0.9	0.9	0.9	0.9	0.94
Cytosolic purine 5'-nucleotidase OS=Homo sapiens OX=9606 GN=NT5C2 PE=1 SV=1	P49902	0.6	0.9	0.857143	0.692308	0.75	0.705882	0.94
Ras-related protein Rab-5C OS=Homo sapiens OX=9606 GN=RAB5C PE=1 SV=2	P51148	0.7	0.8	0.777778	0.727273	0.75	0.736842	0.94
Isocitrate dehydrogenase [NAD] subunit gamma, mitochondrial OS=Homo sapiens OX=9606 GN=IDH3G PE=1 SV=1	P51553	0.8	1	1	0.833333	0.9	0.888889	0.94
F-actin-capping protein subunit alpha-1 OS=Homo sapiens OX=9606 GN=CAPZA1 PE=1 SV=3	P52907	0.8	1	1	0.833333	0.9	0.888889	0.94
Protein transport protein Sec24C OS=Homo sapiens OX=9606 GN=SEC24C PE=1 SV=3	P53992	0.7	1	1	0.769231	0.85	0.823529	0.94
Sodium/potassium-transporting ATPase subunit beta-3 OS=Homo sapiens OX=9606 GN=ATP1B3 PE=1 SV=1	P54709	0.7	0.8	0.777778	0.727273	0.75	0.736842	0.94
Nucleosome assembly protein 1-like 1 OS=Homo sapiens OX=9606 GN=NAP1L1 PE=1 SV=1	P55209	0.8	0.8	0.8	0.8	0.8	0.8	0.94
Double-stranded RNA-specific adenosine deaminase OS=Homo sapiens OX=9606 GN=ADAR PE=1 SV=4	P55265	1	0.9	0.909091	1	0.95	0.952381	0.94
NHP2-like protein 1 OS=Homo sapiens OX=9606 GN=SNU13 PE=1 SV=3	P55769	0.8	0.7	0.727273	0.777778	0.75	0.761905	0.94
Ubiquitin-conjugating enzyme E2 N OS=Homo sapiens OX=9606 GN=UBE2N PE=1 SV=1	P61088	0.9	0.7	0.75	0.875	0.8	0.818182	0.94
Pterin-4-alpha-carbinolamine dehydratase OS=Homo sapiens OX=9606 GN=PCBD1 PE=1 SV=2	P61457	0.9	0.9	0.9	0.9	0.9	0.9	0.94
Transforming protein RhoA OS=Homo sapiens OX=9606 GN=RHOA PE=1 SV=1	P61586	0.8	0.8	0.8	0.8	0.8	0.8	0.94
40S ribosomal protein S7 OS=Homo sapiens OX=9606 GN=RPS7 PE=1 SV=1	P62081	0.7	0.9	0.875	0.75	0.8	0.777778	0.94
26S proteasome regulatory subunit 8 OS=Homo sapiens OX=9606 GN=PSMC5 PE=1 SV=1	P62195	0.8	0.9	0.888889	0.818182	0.85	0.842105	0.94
40S ribosomal protein S15a OS=Homo sapiens OX=9606 GN=RPS15A PE=1 SV=2	P62244	0.8	0.9	0.888889	0.818182	0.85	0.842105	0.94
60S ribosomal protein L7a OS=Homo sapiens OX=9606 GN=RPL7A PE=1 SV=2	P62424	0.8	0.9	0.888889	0.818182	0.85	0.842105	0.94
Ras-related protein Rab-1A OS=Homo sapiens OX=9606 GN=RAB1A PE=1 SV=3	P62820	0.7	1	1	0.769231	0.85	0.823529	0.94
Transcription factor A, mitochondrial OS=Homo sapiens OX=9606 GN=TFAM PE=1 SV=1	Q00059	0.9	0.8	0.818182	0.888889	0.85	0.857143	0.94
Nucleolysin TIAR OS=Homo sapiens OX=9606 GN=TIAL1 PE=1 SV=1	Q01085	0.8	0.9	0.888889	0.818182	0.85	0.842105	0.94
Single-stranded DNA-binding protein, mitochondrial OS=Homo sapiens OX=9606 GN=SSBP1 PE=1 SV=1	Q04837	0.7	0.8	0.777778	0.727273	0.75	0.736842	0.94
Serine/arginine-rich splicing factor 9 OS=Homo sapiens OX=9606 GN=SRSF9 PE=1 SV=1	Q13242	0.8	0.8	0.8	0.8	0.8	0.8	0.94
Translation initiation factor eIF-2B subunit alpha OS=Homo sapiens OX=9606 GN=EIF2B1 PE=1 SV=1	Q14232	0.6	0.9	0.857143	0.692308	0.75	0.705882	0.94
Structural maintenance of chromosomes protein 1A OS=Homo sapiens OX=9606 GN=SMC1A PE=1 SV=2	Q14683	0.6	0.9	0.857143	0.692308	0.75	0.705882	0.94
Raftlin OS=Homo sapiens OX=9606 GN=RFTN1 PE=1 SV=4	Q14699	0.7	1	1	0.769231	0.85	0.823529	0.94
Importin subunit beta-1 OS=Homo sapiens OX=9606 GN=KPNB1 PE=1 SV=2	Q14974	0.8	0.8	0.8	0.8	0.8	0.8	0.94
Gamma-interferon-inducible protein 16 OS=Homo sapiens OX=9606 GN=IFI16 PE=1 SV=3	Q16666	0.8	0.8	0.8	0.8	0.8	0.8	0.94
Lethal(2) giant larvae protein homolog 2 OS=Homo sapiens OX=9606 GN=LLGL2 PE=1 SV=2	Q6P1M3	0.8	0.9	0.888889	0.818182	0.85	0.842105	0.94
Pre-mRNA-processing-splicing factor 8 OS=Homo sapiens OX=9606 GN=PRPF8 PE=1 SV=2	Q6P2Q9	0.8	0.9	0.888889	0.818182	0.85	0.842105	0.94
Eukaryotic translation initiation factor 3 subunit M OS=Homo sapiens OX=9606 GN=EIF3M PE=1 SV=1	Q7L2H7	0.7	0.9	0.875	0.75	0.8	0.777778	0.94
Cell division cycle and apoptosis regulator protein 1 OS=Homo sapiens OX=9606 GN=CCAR1 PE=1 SV=2	Q8IX12	0.6	0.9	0.857143	0.692308	0.75	0.705882	0.94
Nuclear pore complex protein Nup93 OS=Homo sapiens OX=9606 GN=NUP93 PE=1 SV=2	Q8N1F7	0.8	0.8	0.8	0.8	0.8	0.8	0.94
Minor histocompatibility antigen H13 OS=Homo sapiens OX=9606 GN=HM13 PE=1 SV=1	Q8TCT9	0.9	0.9	0.9	0.9	0.9	0.9	0.94
E3 ubiquitin-protein ligase DTX3L OS=Homo sapiens OX=9606 GN=DTX3L PE=1 SV=1	Q8TDB6	0.7	0.8	0.777778	0.727273	0.75	0.736842	0.94
Signal transducing adapter molecule 1 OS=Homo sapiens OX=9606 GN=STAM PE=1 SV=3	Q92783	0.6	0.9	0.857143	0.692308	0.75	0.705882	0.94
Osteoclast-stimulating factor 1 OS=Homo sapiens OX=9606 GN=OSTF1 PE=1 SV=2	Q92882	0.8	0.8	0.8	0.8	0.8	0.8	0.94
Regulator of nonsense transcripts 1 OS=Homo sapiens OX=9606 GN=UPF1 PE=1 SV=2	Q92900	0.9	0.7	0.75	0.875	0.8	0.818182	0.94
Succinate--CoA ligase [GDP-forming] subunit beta, mitochondrial OS=Homo sapiens OX=9606 GN=SUCLG2 PE=1 SV=2	Q96I99	0.8	0.7	0.727273	0.777778	0.75	0.761905	0.94
Protein/nucleic acid deglycase DJ-1 OS=Homo sapiens OX=9606 GN=PARK7 PE=1 SV=2	Q99497	0.7	0.7	0.7	0.7	0.7	0.7	0.94
Endophilin-A2 OS=Homo sapiens OX=9606 GN=SH3GL1 PE=1 SV=1	Q99961	0.8	0.8	0.8	0.8	0.8	0.8	0.94
Coronin-1B OS=Homo sapiens OX=9606 GN=CORO1B PE=1 SV=1	Q9BR76	0.7	0.7	0.7	0.7	0.7	0.7	0.94
Haloacid dehalogenase-like hydrolase domain-containing protein 3 OS=Homo sapiens OX=9606 GN=HDHD3 PE=1 SV=1	Q9BSH5	0.8	0.9	0.888889	0.818182	0.85	0.842105	0.94
182 kDa tankyrase-1-binding protein OS=Homo sapiens OX=9606 GN=TNKS1BP1 PE=1 SV=4	Q9C0C2	0.9	0.9	0.9	0.9	0.9	0.9	0.94
Ester hydrolase C11orf54 OS=Homo sapiens OX=9606 GN=C11orf54 PE=1 SV=1	Q9H0W9	0.8	0.7	0.727273	0.777778	0.75	0.761905	0.94
Golgi reassembly-stacking protein 2 OS=Homo sapiens OX=9606 GN=GORASP2 PE=1 SV=3	Q9H8Y8	0.8	0.9	0.888889	0.818182	0.85	0.842105	0.94
Ketosamine-3-kinase OS=Homo sapiens OX=9606 GN=FN3KRP PE=1 SV=2	Q9HA64	0.6	0.8	0.75	0.666667	0.7	0.666667	0.94
Obg-like ATPase 1 OS=Homo sapiens OX=9606 GN=OLA1 PE=1 SV=2	Q9NTK5	0.8	0.7	0.727273	0.777778	0.75	0.761905	0.94
Acetyl-coenzyme A synthetase 2-like, mitochondrial OS=Homo sapiens OX=9606 GN=ACSS1 PE=1 SV=2	Q9NUB1	0.7	0.8	0.777778	0.727273	0.75	0.736842	0.94
Succinate--CoA ligase [ADP-forming] subunit beta, mitochondrial OS=Homo sapiens OX=9606 GN=SUCLA2 PE=1 SV=3	Q9P2R7	0.7	0.8	0.777778	0.727273	0.75	0.736842	0.94
Heat shock protein beta-7 OS=Homo sapiens OX=9606 GN=HSPB7 PE=1 SV=1	Q9UBY9	0.7	0.9	0.875	0.75	0.8	0.777778	0.94
Proteasome activator complex subunit 2 OS=Homo sapiens OX=9606 GN=PSME2 PE=1 SV=4	Q9UL46	0.8	0.8	0.8	0.8	0.8	0.8	0.94
Long-chain-fatty-acid--CoA ligase 5 OS=Homo sapiens OX=9606 GN=ACSL5 PE=1 SV=1	Q9ULC5	0.8	0.9	0.888889	0.818182	0.85	0.842105	0.94
COP9 signalosome complex subunit 3 OS=Homo sapiens OX=9606 GN=COPS3 PE=1 SV=3	Q9UNS2	0.8	0.8	0.8	0.8	0.8	0.8	0.94
NSFL1 cofactor p47 OS=Homo sapiens OX=9606 GN=NSFL1C PE=1 SV=2	Q9UNZ2	0.6	0.9	0.857143	0.692308	0.75	0.705882	0.94
Deoxyribose-phosphate aldolase OS=Homo sapiens OX=9606 GN=DERA PE=1 SV=2	Q9Y315	0.8	1	1	0.833333	0.9	0.888889	0.94
Mitochondrial fission 1 protein OS=Homo sapiens OX=9606 GN=FIS1 PE=1 SV=2	Q9Y3D6	0.7	0.8	0.777778	0.727273	0.75	0.736842	0.94
Exosome complex exonuclease RRP44 OS=Homo sapiens OX=9606 GN=DIS3 PE=1 SV=2	Q9Y2L1	0.9	0.9	0.9	0.9	0.9	0.9	0.935
U4/U6 small nuclear ribonucleoprotein Prp4 OS=Homo sapiens OX=9606 GN=PRPF4 PE=1 SV=2	O43172	0.7	0.9	0.875	0.75	0.8	0.777778	0.935
Methylosome subunit pICln OS=Homo sapiens OX=9606 GN=CLNS1A PE=1 SV=1	P54105	0.7	0.9	0.875	0.75	0.8	0.777778	0.935
Immunoglobulin heavy variable 3-49 OS=Homo sapiens OX=9606 GN=IGHV3-49 PE=3 SV=1	A0A0A0MS15	1	0.8	0.833333	1	0.9	0.909091	0.93
CCR4-NOT transcription complex subunit 1 OS=Homo sapiens OX=9606 GN=CNOT1 PE=1 SV=2	A5YKK6	0.7	0.8	0.777778	0.727273	0.75	0.736842	0.93
Importin subunit alpha-3 OS=Homo sapiens OX=9606 GN=KPNA4 PE=1 SV=1	O00629	0.7	0.9	0.875	0.75	0.8	0.777778	0.93
Tapasin OS=Homo sapiens OX=9606 GN=TAPBP PE=1 SV=1	O15533	0.7	1	1	0.769231	0.85	0.823529	0.93
Apolipoprotein A-II OS=Homo sapiens OX=9606 GN=APOA2 PE=1 SV=1	P02652	0.8	0.7	0.727273	0.777778	0.75	0.761905	0.93
Glyceraldehyde-3-phosphate dehydrogenase OS=Homo sapiens OX=9606 GN=GAPDH PE=1 SV=3	P04406	0.9	0.9	0.9	0.9	0.9	0.9	0.93
Histone H1.2 OS=Homo sapiens OX=9606 GN=HIST1H1C PE=1 SV=2	P16403	0.6	0.9	0.857143	0.692308	0.75	0.705882	0.93
Succinate dehydrogenase [ubiquinone] iron-sulfur subunit, mitochondrial OS=Homo sapiens OX=9606 GN=SDHB PE=1 SV=3	P21912	0.8	0.7	0.727273	0.777778	0.75	0.761905	0.93
Protein disulfide-isomerase A3 OS=Homo sapiens OX=9606 GN=PDIA3 PE=1 SV=4	P30101	0.8	0.9	0.888889	0.818182	0.85	0.842105	0.93
Aldo-keto reductase family 1 member C3 OS=Homo sapiens OX=9606 GN=AKR1C3 PE=1 SV=4	P42330	0.9	0.9	0.9	0.9	0.9	0.9	0.93
60S ribosomal protein L5 OS=Homo sapiens OX=9606 GN=RPL5 PE=1 SV=3	P46777	0.8	0.9	0.888889	0.818182	0.85	0.842105	0.93
40S ribosomal protein S5 OS=Homo sapiens OX=9606 GN=RPS5 PE=1 SV=4	P46782	0.8	0.8	0.8	0.8	0.8	0.8	0.93
Casein kinase I isoform alpha OS=Homo sapiens OX=9606 GN=CSNK1A1 PE=1 SV=2	P48729	0.9	0.8	0.818182	0.888889	0.85	0.857143	0.93
39S ribosomal protein L19, mitochondrial OS=Homo sapiens OX=9606 GN=MRPL19 PE=1 SV=2	P49406	0.8	0.9	0.888889	0.818182	0.85	0.842105	0.93
RNA-binding protein 25 OS=Homo sapiens OX=9606 GN=RBM25 PE=1 SV=3	P49756	0.7	0.8	0.777778	0.727273	0.75	0.736842	0.93
Afadin OS=Homo sapiens OX=9606 GN=AFDN PE=1 SV=3	P55196	0.5	0.9	0.833333	0.642857	0.7	0.625	0.93
Methionine--tRNA ligase, cytoplasmic OS=Homo sapiens OX=9606 GN=MARS PE=1 SV=2	P56192	0.8	1	1	0.833333	0.9	0.888889	0.93
Coatomer subunit zeta-1 OS=Homo sapiens OX=9606 GN=COPZ1 PE=1 SV=1	P61923	0.9	1	1	0.909091	0.95	0.947368	0.93
40S ribosomal protein S8 OS=Homo sapiens OX=9606 GN=RPS8 PE=1 SV=2	P62241	0.8	0.9	0.888889	0.818182	0.85	0.842105	0.93
26S proteasome regulatory subunit 10B OS=Homo sapiens OX=9606 GN=PSMC6 PE=1 SV=1	P62333	0.8	0.9	0.888889	0.818182	0.85	0.842105	0.93
40S ribosomal protein S6 OS=Homo sapiens OX=9606 GN=RPS6 PE=1 SV=1	P62753	0.8	0.8	0.8	0.8	0.8	0.8	0.93
60S ribosomal protein L32 OS=Homo sapiens OX=9606 GN=RPL32 PE=1 SV=2	P62910	0.8	0.8	0.8	0.8	0.8	0.8	0.93
Tubulin beta-4B chain OS=Homo sapiens OX=9606 GN=TUBB4B PE=1 SV=1	P68371	0.9	0.8	0.818182	0.888889	0.85	0.857143	0.93
Pseudouridine-5'-phosphatase OS=Homo sapiens OX=9606 GN=PUDP PE=1 SV=3	Q08623	0.6	0.8	0.75	0.666667	0.7	0.666667	0.93
Splicing factor 3A subunit 3 OS=Homo sapiens OX=9606 GN=SF3A3 PE=1 SV=1	Q12874	0.8	0.9	0.888889	0.818182	0.85	0.842105	0.93
Dynactin subunit 2 OS=Homo sapiens OX=9606 GN=DCTN2 PE=1 SV=4	Q13561	0.7	0.9	0.875	0.75	0.8	0.777778	0.93
Desmoglein-2 OS=Homo sapiens OX=9606 GN=DSG2 PE=1 SV=2	Q14126	0.9	0.9	0.9	0.9	0.9	0.9	0.93
Peroxisomal acyl-coenzyme A oxidase 1 OS=Homo sapiens OX=9606 GN=ACOX1 PE=1 SV=3	Q15067	0.8	0.9	0.888889	0.818182	0.85	0.842105	0.93
Non-POU domain-containing octamer-binding protein OS=Homo sapiens OX=9606 GN=NONO PE=1 SV=4	Q15233	0.8	0.8	0.8	0.8	0.8	0.8	0.93
Translocating chain-associated membrane protein 1 OS=Homo sapiens OX=9606 GN=TRAM1 PE=1 SV=3	Q15629	0.8	0.7	0.727273	0.777778	0.75	0.761905	0.93
Septin-7 OS=Homo sapiens OX=9606 GN=SEPT7 PE=1 SV=2	Q16181	0.8	0.9	0.888889	0.818182	0.85	0.842105	0.93
Proteasomal ubiquitin receptor ADRM1 OS=Homo sapiens OX=9606 GN=ADRM1 PE=1 SV=2	Q16186	0.9	0.8	0.818182	0.888889	0.85	0.857143	0.93
WASH complex subunit 2A OS=Homo sapiens OX=9606 GN=WASHC2A PE=1 SV=3	Q641Q2	0.9	1	1	0.909091	0.95	0.947368	0.93
Lysophosphatidylcholine acyltransferase 2 OS=Homo sapiens OX=9606 GN=LPCAT2 PE=1 SV=1	Q7L5N7	0.9	0.9	0.9	0.9	0.9	0.9	0.93
NADH dehydrogenase [ubiquinone] 1 alpha subcomplex assembly factor 2 OS=Homo sapiens OX=9606 GN=NDUFAF2 PE=1 SV=1	Q8N183	0.9	0.8	0.818182	0.888889	0.85	0.857143	0.93
Ubiquitin-like domain-containing CTD phosphatase 1 OS=Homo sapiens OX=9606 GN=UBLCP1 PE=1 SV=2	Q8WVY7	0.8	0.9	0.888889	0.818182	0.85	0.842105	0.93
Protein NDRG1 OS=Homo sapiens OX=9606 GN=NDRG1 PE=1 SV=1	Q92597	0.8	0.7	0.727273	0.777778	0.75	0.761905	0.93
Conserved oligomeric Golgi complex subunit 3 OS=Homo sapiens OX=9606 GN=COG3 PE=1 SV=3	Q96JB2	0.8	0.9	0.888889	0.818182	0.85	0.842105	0.93
Translin-associated protein X OS=Homo sapiens OX=9606 GN=TSNAX PE=1 SV=1	Q99598	0.6	0.9	0.857143	0.692308	0.75	0.705882	0.93
Cell surface A33 antigen OS=Homo sapiens OX=9606 GN=GPA33 PE=1 SV=1	Q99795	0.8	0.9	0.888889	0.818182	0.85	0.842105	0.93
Protein arginine N-methyltransferase 1 OS=Homo sapiens OX=9606 GN=PRMT1 PE=1 SV=3	Q99873	0.7	0.9	0.875	0.75	0.8	0.777778	0.93
Charged multivesicular body protein 1a OS=Homo sapiens OX=9606 GN=CHMP1A PE=1 SV=1	Q9HD42	0.7	0.9	0.875	0.75	0.8	0.777778	0.93
Phosphatidylinositide phosphatase SAC1 OS=Homo sapiens OX=9606 GN=SACM1L PE=1 SV=2	Q9NTJ5	0.8	1	1	0.833333	0.9	0.888889	0.93
OCIA domain-containing protein 1 OS=Homo sapiens OX=9606 GN=OCIAD1 PE=1 SV=1	Q9NX40	0.7	0.8	0.777778	0.727273	0.75	0.736842	0.93
Endoplasmic reticulum aminopeptidase 1 OS=Homo sapiens OX=9606 GN=ERAP1 PE=1 SV=3	Q9NZ08	0.8	0.9	0.888889	0.818182	0.85	0.842105	0.93
Eukaryotic translation initiation factor 3 subunit K OS=Homo sapiens OX=9606 GN=EIF3K PE=1 SV=1	Q9UBQ5	0.8	0.9	0.888889	0.818182	0.85	0.842105	0.93
Glyoxylate reductase/hydroxypyruvate reductase OS=Homo sapiens OX=9606 GN=GRHPR PE=1 SV=1	Q9UBQ7	0.5	0.9	0.833333	0.642857	0.7	0.625	0.93
Cytochrome c oxidase assembly factor 3 homolog, mitochondrial OS=Homo sapiens OX=9606 GN=COA3 PE=1 SV=1	Q9Y2R0	0.8	1	1	0.833333	0.9	0.888889	0.93
Calcium-regulated heat-stable protein 1 OS=Homo sapiens OX=9606 GN=CARHSP1 PE=1 SV=2	Q9Y2V2	0.8	0.9	0.888889	0.818182	0.85	0.842105	0.93
Protein MRVI1 OS=Homo sapiens OX=9606 GN=MRVI1 PE=1 SV=3	Q9Y6F6	0.9	0.6	0.692308	0.857143	0.75	0.782609	0.93
SWI/SNF-related matrix-associated actin-dependent regulator of chromatin subfamily A member 5 OS=Homo sapiens OX=9606 GN=SMARCA5 PE=1 SV=1	O60264	0.7	0.9	0.875	0.75	0.8	0.777778	0.93
V-type proton ATPase subunit G 1 OS=Homo sapiens OX=9606 GN=ATP6V1G1 PE=1 SV=3	O75348	0.7	0.9	0.875	0.75	0.8	0.777778	0.93
Golgi SNAP receptor complex member 1 OS=Homo sapiens OX=9606 GN=GOSR1 PE=1 SV=1	O95249	0.6	0.9	0.857143	0.692308	0.75	0.705882	0.93
Purine nucleoside phosphorylase OS=Homo sapiens OX=9606 GN=PNP PE=1 SV=2	P00491	0.7	0.8	0.777778	0.727273	0.75	0.736842	0.93
Uroporphyrinogen decarboxylase OS=Homo sapiens OX=9606 GN=UROD PE=1 SV=2	P06132	0.6	1	1	0.714286	0.8	0.75	0.93
L-lactate dehydrogenase B chain OS=Homo sapiens OX=9606 GN=LDHB PE=1 SV=2	P07195	0.8	0.6	0.666667	0.75	0.7	0.727273	0.93
Cathepsin D OS=Homo sapiens OX=9606 GN=CTSD PE=1 SV=1	P07339	0.7	0.8	0.777778	0.727273	0.75	0.736842	0.93
Tropomyosin beta chain OS=Homo sapiens OX=9606 GN=TPM2 PE=1 SV=1	P07951	0.9	0.7	0.75	0.875	0.8	0.818182	0.93
Xaa-Pro dipeptidase OS=Homo sapiens OX=9606 GN=PEPD PE=1 SV=3	P12955	0.7	0.8	0.777778	0.727273	0.75	0.736842	0.93
Short-chain specific acyl-CoA dehydrogenase, mitochondrial OS=Homo sapiens OX=9606 GN=ACADS PE=1 SV=1	P16219	0.7	0.8	0.777778	0.727273	0.75	0.736842	0.93
NADH-ubiquinone oxidoreductase 75 kDa subunit, mitochondrial OS=Homo sapiens OX=9606 GN=NDUFS1 PE=1 SV=3	P28331	0.7	0.7	0.7	0.7	0.7	0.7	0.93
Inositol monophosphatase 1 OS=Homo sapiens OX=9606 GN=IMPA1 PE=1 SV=1	P29218	0.9	0.6	0.692308	0.857143	0.75	0.782609	0.93
Collagen alpha-1(XV) chain OS=Homo sapiens OX=9606 GN=COL15A1 PE=1 SV=2	P39059	0.7	0.8	0.777778	0.727273	0.75	0.736842	0.93
Carnitine O-palmitoyltransferase 1, liver isoform OS=Homo sapiens OX=9606 GN=CPT1A PE=1 SV=2	P50416	0.7	0.8	0.777778	0.727273	0.75	0.736842	0.93
Ribosomal protein S6 kinase alpha-3 OS=Homo sapiens OX=9606 GN=RPS6KA3 PE=1 SV=1	P51812	0.7	0.9	0.875	0.75	0.8	0.777778	0.93
Transmembrane protein 33 OS=Homo sapiens OX=9606 GN=TMEM33 PE=1 SV=2	P57088	0.7	0.8	0.777778	0.727273	0.75	0.736842	0.93
40S ribosomal protein S11 OS=Homo sapiens OX=9606 GN=RPS11 PE=1 SV=3	P62280	0.7	0.8	0.777778	0.727273	0.75	0.736842	0.93
ADP-ribosylation factor 6 OS=Homo sapiens OX=9606 GN=ARF6 PE=1 SV=2	P62330	0.7	0.8	0.777778	0.727273	0.75	0.736842	0.93
40S ribosomal protein S24 OS=Homo sapiens OX=9606 GN=RPS24 PE=1 SV=1	P62847	0.8	0.9	0.888889	0.818182	0.85	0.842105	0.93
40S ribosomal protein S28 OS=Homo sapiens OX=9606 GN=RPS28 PE=1 SV=1	P62857	0.8	0.8	0.8	0.8	0.8	0.8	0.93
Nuclear pore complex protein Nup160 OS=Homo sapiens OX=9606 GN=NUP160 PE=1 SV=3	Q12769	0.7	0.8	0.777778	0.727273	0.75	0.736842	0.93
26S proteasome non-ATPase regulatory subunit 2 OS=Homo sapiens OX=9606 GN=PSMD2 PE=1 SV=3	Q13200	0.8	0.8	0.8	0.8	0.8	0.8	0.93
Nucleoside diphosphate kinase 3 OS=Homo sapiens OX=9606 GN=NME3 PE=1 SV=2	Q13232	0.7	0.9	0.875	0.75	0.8	0.777778	0.93
Spectrin alpha chain, non-erythrocytic 1 OS=Homo sapiens OX=9606 GN=SPTAN1 PE=1 SV=3	Q13813	0.6	0.8	0.75	0.666667	0.7	0.666667	0.93
ATP-dependent Clp protease proteolytic subunit, mitochondrial OS=Homo sapiens OX=9606 GN=CLPP PE=1 SV=1	Q16740	0.8	0.9	0.888889	0.818182	0.85	0.842105	0.93
60S ribosomal protein L36a-like OS=Homo sapiens OX=9606 GN=RPL36AL PE=1 SV=3	Q969Q0	0.7	0.8	0.777778	0.727273	0.75	0.736842	0.93
Dynein light chain 2, cytoplasmic OS=Homo sapiens OX=9606 GN=DYNLL2 PE=1 SV=1	Q96FJ2	0.7	0.9	0.875	0.75	0.8	0.777778	0.93
Ran-binding protein 3 OS=Homo sapiens OX=9606 GN=RANBP3 PE=1 SV=1	Q9H6Z4	0.7	0.8	0.777778	0.727273	0.75	0.736842	0.93
Jupiter microtubule associated homolog 2 OS=Homo sapiens OX=9606 GN=JPT2 PE=1 SV=1	Q9H910	0.7	0.9	0.875	0.75	0.8	0.777778	0.93
[Pyruvate dehydrogenase [acetyl-transferring]]-phosphatase 1, mitochondrial OS=Homo sapiens OX=9606 GN=PDP1 PE=1 SV=3	Q9P0J1	0.7	0.9	0.875	0.75	0.8	0.777778	0.93
Coatomer subunit gamma-2 OS=Homo sapiens OX=9606 GN=COPG2 PE=1 SV=1	Q9UBF2	0.6	0.9	0.857143	0.692308	0.75	0.705882	0.93
SH3 domain-binding protein 1 OS=Homo sapiens OX=9606 GN=SH3BP1 PE=1 SV=3	Q9Y3L3	0.6	0.8	0.75	0.666667	0.7	0.666667	0.93
DNA fragmentation factor subunit alpha OS=Homo sapiens OX=9606 GN=DFFA PE=1 SV=1	O00273	0.6	0.9	0.857143	0.692308	0.75	0.705882	0.92
E3 UFM1-protein ligase 1 OS=Homo sapiens OX=9606 GN=UFL1 PE=1 SV=2	O94874	0.7	0.9	0.875	0.75	0.8	0.777778	0.92
Glutamate dehydrogenase 1, mitochondrial OS=Homo sapiens OX=9606 GN=GLUD1 PE=1 SV=2	P00367	0.8	0.6	0.666667	0.75	0.7	0.727273	0.92
Propionyl-CoA carboxylase beta chain, mitochondrial OS=Homo sapiens OX=9606 GN=PCCB PE=1 SV=3	P05166	0.8	0.9	0.888889	0.818182	0.85	0.842105	0.92
Gelsolin OS=Homo sapiens OX=9606 GN=GSN PE=1 SV=1	P06396	0.7	0.8	0.777778	0.727273	0.75	0.736842	0.92
Villin-1 OS=Homo sapiens OX=9606 GN=VIL1 PE=1 SV=4	P09327	0.9	0.9	0.9	0.9	0.9	0.9	0.92
Complement component C7 OS=Homo sapiens OX=9606 GN=C7 PE=1 SV=2	P10643	0.9	0.8	0.818182	0.888889	0.85	0.857143	0.92
Insulin-degrading enzyme OS=Homo sapiens OX=9606 GN=IDE PE=1 SV=4	P14735	0.7	0.8	0.777778	0.727273	0.75	0.736842	0.92
60S ribosomal protein L7 OS=Homo sapiens OX=9606 GN=RPL7 PE=1 SV=1	P18124	0.7	0.8	0.777778	0.727273	0.75	0.736842	0.92
Prostaglandin G/H synthase 1 OS=Homo sapiens OX=9606 GN=PTGS1 PE=1 SV=2	P23219	0.9	0.7	0.75	0.875	0.8	0.818182	0.92
D-dopachrome decarboxylase OS=Homo sapiens OX=9606 GN=DDT PE=1 SV=3	P30046	0.8	0.9	0.888889	0.818182	0.85	0.842105	0.92
Adenylosuccinate synthetase isozyme 2 OS=Homo sapiens OX=9606 GN=ADSS PE=1 SV=3	P30520	0.8	0.9	0.888889	0.818182	0.85	0.842105	0.92
Basigin OS=Homo sapiens OX=9606 GN=BSG PE=1 SV=2	P35613	0.8	0.6	0.666667	0.75	0.7	0.727273	0.92
Macrophage-capping protein OS=Homo sapiens OX=9606 GN=CAPG PE=1 SV=2	P40121	0.7	0.9	0.875	0.75	0.8	0.777778	0.92
Alanine--tRNA ligase, cytoplasmic OS=Homo sapiens OX=9606 GN=AARS PE=1 SV=2	P49588	0.8	0.9	0.888889	0.818182	0.85	0.842105	0.92
14-3-3 protein gamma OS=Homo sapiens OX=9606 GN=YWHAG PE=1 SV=2	P61981	0.7	0.7	0.7	0.7	0.7	0.7	0.92
Growth factor receptor-bound protein 2 OS=Homo sapiens OX=9606 GN=GRB2 PE=1 SV=1	P62993	0.8	0.9	0.888889	0.818182	0.85	0.842105	0.92
Clathrin heavy chain 1 OS=Homo sapiens OX=9606 GN=CLTC PE=1 SV=5	Q00610	0.8	0.7	0.727273	0.777778	0.75	0.761905	0.92
Peroxiredoxin-1 OS=Homo sapiens OX=9606 GN=PRDX1 PE=1 SV=1	Q06830	0.8	0.9	0.888889	0.818182	0.85	0.842105	0.92
Transcription intermediary factor 1-beta OS=Homo sapiens OX=9606 GN=TRIM28 PE=1 SV=5	Q13263	0.8	0.9	0.888889	0.818182	0.85	0.842105	0.92
Metaxin-1 OS=Homo sapiens OX=9606 GN=MTX1 PE=1 SV=3	Q13505	0.8	0.9	0.888889	0.818182	0.85	0.842105	0.92
Dynactin subunit 1 OS=Homo sapiens OX=9606 GN=DCTN1 PE=1 SV=3	Q14203	0.8	0.9	0.888889	0.818182	0.85	0.842105	0.92
Lysine--tRNA ligase OS=Homo sapiens OX=9606 GN=KARS PE=1 SV=3	Q15046	0.6	0.9	0.857143	0.692308	0.75	0.705882	0.92
COP9 signalosome complex subunit 6 OS=Homo sapiens OX=9606 GN=COPS6 PE=1 SV=1	Q7L5N1	0.6	0.9	0.857143	0.692308	0.75	0.705882	0.92
WD repeat and FYVE domain-containing protein 1 OS=Homo sapiens OX=9606 GN=WDFY1 PE=1 SV=1	Q8IWB7	0.8	0.8	0.8	0.8	0.8	0.8	0.92
NEDD8-activating enzyme E1 catalytic subunit OS=Homo sapiens OX=9606 GN=UBA3 PE=1 SV=2	Q8TBC4	0.6	0.8	0.75	0.666667	0.7	0.666667	0.92
ATP-dependent RNA helicase DDX1 OS=Homo sapiens OX=9606 GN=DDX1 PE=1 SV=2	Q92499	0.8	0.9	0.888889	0.818182	0.85	0.842105	0.92
39S ribosomal protein L24, mitochondrial OS=Homo sapiens OX=9606 GN=MRPL24 PE=1 SV=1	Q96A35	0.9	1	1	0.909091	0.95	0.947368	0.92
AP-2 complex subunit mu OS=Homo sapiens OX=9606 GN=AP2M1 PE=1 SV=2	Q96CW1	0.7	1	1	0.769231	0.85	0.823529	0.92
DnaJ homolog subfamily A member 3, mitochondrial OS=Homo sapiens OX=9606 GN=DNAJA3 PE=1 SV=2	Q96EY1	0.4	0.9	0.8	0.6	0.65	0.533333	0.92
Zinc finger RNA-binding protein OS=Homo sapiens OX=9606 GN=ZFR PE=1 SV=2	Q96KR1	0.8	0.9	0.888889	0.818182	0.85	0.842105	0.92
SRSF protein kinase 1 OS=Homo sapiens OX=9606 GN=SRPK1 PE=1 SV=2	Q96SB4	0.5	0.9	0.833333	0.642857	0.7	0.625	0.92
Prefoldin subunit 5 OS=Homo sapiens OX=9606 GN=PFDN5 PE=1 SV=2	Q99471	0.7	0.8	0.777778	0.727273	0.75	0.736842	0.92
Synembryn-A OS=Homo sapiens OX=9606 GN=RIC8A PE=1 SV=3	Q9NPQ8	0.6	0.9	0.857143	0.692308	0.75	0.705882	0.92
Sialic acid synthase OS=Homo sapiens OX=9606 GN=NANS PE=1 SV=2	Q9NR45	0.8	0.8	0.8	0.8	0.8	0.8	0.92
UDP-glucose:glycoprotein glucosyltransferase 1 OS=Homo sapiens OX=9606 GN=UGGT1 PE=1 SV=3	Q9NYU2	0.6	0.9	0.857143	0.692308	0.75	0.705882	0.92
Vacuolar protein sorting-associated protein 28 homolog OS=Homo sapiens OX=9606 GN=VPS28 PE=1 SV=1	Q9UK41	0.6	0.9	0.857143	0.692308	0.75	0.705882	0.92
Eukaryotic translation initiation factor 3 subunit L OS=Homo sapiens OX=9606 GN=EIF3L PE=1 SV=1	Q9Y262	0.8	0.8	0.8	0.8	0.8	0.8	0.92
28S ribosomal protein S7, mitochondrial OS=Homo sapiens OX=9606 GN=MRPS7 PE=1 SV=2	Q9Y2R9	0.8	0.9	0.888889	0.818182	0.85	0.842105	0.92
Hypoxia up-regulated protein 1 OS=Homo sapiens OX=9606 GN=HYOU1 PE=1 SV=1	Q9Y4L1	0.7	0.9	0.875	0.75	0.8	0.777778	0.92
Transportin-3 OS=Homo sapiens OX=9606 GN=TNPO3 PE=1 SV=3	Q9Y5L0	0.7	0.9	0.875	0.75	0.8	0.777778	0.92
Pyridoxal kinase OS=Homo sapiens OX=9606 GN=PDXK PE=1 SV=1	O00764	0.7	0.8	0.777778	0.727273	0.75	0.736842	0.92
Eukaryotic translation initiation factor 3 subunit D OS=Homo sapiens OX=9606 GN=EIF3D PE=1 SV=1	O15371	0.8	0.8	0.8	0.8	0.8	0.8	0.92
26S proteasome non-ATPase regulatory subunit 3 OS=Homo sapiens OX=9606 GN=PSMD3 PE=1 SV=2	O43242	0.6	0.8	0.75	0.666667	0.7	0.666667	0.92
Pleiotropic regulator 1 OS=Homo sapiens OX=9606 GN=PLRG1 PE=1 SV=1	O43660	0.7	1	1	0.769231	0.85	0.823529	0.92
Vesicle-associated membrane protein-associated protein B/C OS=Homo sapiens OX=9606 GN=VAPB PE=1 SV=3	O95292	0.8	0.8	0.8	0.8	0.8	0.8	0.92
Decorin OS=Homo sapiens OX=9606 GN=DCN PE=1 SV=1	P07585	0.9	0.7	0.75	0.875	0.8	0.818182	0.92
Farnesyl pyrophosphate synthase OS=Homo sapiens OX=9606 GN=FDPS PE=1 SV=4	P14324	0.7	0.8	0.777778	0.727273	0.75	0.736842	0.92
Proteasome subunit beta type-10 OS=Homo sapiens OX=9606 GN=PSMB10 PE=1 SV=1	P40306	0.9	0.7	0.75	0.875	0.8	0.818182	0.92
Enoyl-CoA delta isomerase 1, mitochondrial OS=Homo sapiens OX=9606 GN=ECI1 PE=1 SV=1	P42126	0.7	0.7	0.7	0.7	0.7	0.7	0.92
BH3-interacting domain death agonist OS=Homo sapiens OX=9606 GN=BID PE=1 SV=1	P55957	0.7	0.8	0.777778	0.727273	0.75	0.736842	0.92
ATP-binding cassette sub-family E member 1 OS=Homo sapiens OX=9606 GN=ABCE1 PE=1 SV=1	P61221	0.9	0.9	0.9	0.9	0.9	0.9	0.92
60S ribosomal protein L18a OS=Homo sapiens OX=9606 GN=RPL18A PE=1 SV=2	Q02543	0.8	0.8	0.8	0.8	0.8	0.8	0.92
Twinfilin-2 OS=Homo sapiens OX=9606 GN=TWF2 PE=1 SV=2	Q6IBS0	0.8	0.9	0.888889	0.818182	0.85	0.842105	0.92
Beta-catenin-like protein 1 OS=Homo sapiens OX=9606 GN=CTNNBL1 PE=1 SV=1	Q8WYA6	0.7	0.7	0.7	0.7	0.7	0.7	0.92
Isochorismatase domain-containing protein 1 OS=Homo sapiens OX=9606 GN=ISOC1 PE=1 SV=3	Q96CN7	0.7	0.9	0.875	0.75	0.8	0.777778	0.92
Tensin-1 OS=Homo sapiens OX=9606 GN=TNS1 PE=1 SV=2	Q9HBL0	0.8	0.7	0.727273	0.777778	0.75	0.761905	0.92
ATP-dependent RNA helicase DDX19B OS=Homo sapiens OX=9606 GN=DDX19B PE=1 SV=1	Q9UMR2	0.6	0.9	0.857143	0.692308	0.75	0.705882	0.92
Nucleolar protein 58 OS=Homo sapiens OX=9606 GN=NOP58 PE=1 SV=1	Q9Y2X3	0.7	0.7	0.7	0.7	0.7	0.7	0.92
Transformer-2 protein homolog alpha OS=Homo sapiens OX=9606 GN=TRA2A PE=1 SV=1	Q13595	0.5	0.9	0.833333	0.642857	0.7	0.625	0.915
Interferon regulatory factor 2-binding protein 2 OS=Homo sapiens OX=9606 GN=IRF2BP2 PE=1 SV=2	Q7Z5L9	0.5	0.9	0.833333	0.642857	0.7	0.625	0.915
Paired amphipathic helix protein Sin3a OS=Homo sapiens OX=9606 GN=SIN3A PE=1 SV=2	Q96ST3	0.9	0.9	0.9	0.9	0.9	0.9	0.915
GTP-binding protein 1 OS=Homo sapiens OX=9606 GN=GTPBP1 PE=1 SV=3	O00178	0.7	0.9	0.875	0.75	0.8	0.777778	0.91
Membrane-associated progesterone receptor component 2 OS=Homo sapiens OX=9606 GN=PGRMC2 PE=1 SV=1	O15173	0.9	0.8	0.818182	0.888889	0.85	0.857143	0.91
Actin-related protein 2/3 complex subunit 5 OS=Homo sapiens OX=9606 GN=ARPC5 PE=1 SV=3	O15511	0.6	0.9	0.857143	0.692308	0.75	0.705882	0.91
Exportin-T OS=Homo sapiens OX=9606 GN=XPOT PE=1 SV=2	O43592	0.8	0.8	0.8	0.8	0.8	0.8	0.91
Acyl-protein thioesterase 1 OS=Homo sapiens OX=9606 GN=LYPLA1 PE=1 SV=1	O75608	0.8	0.9	0.888889	0.818182	0.85	0.842105	0.91
Glutaredoxin-3 OS=Homo sapiens OX=9606 GN=GLRX3 PE=1 SV=2	O76003	0.9	0.9	0.9	0.9	0.9	0.9	0.91
AP-2 complex subunit alpha-2 OS=Homo sapiens OX=9606 GN=AP2A2 PE=1 SV=2	O94973	0.9	0.7	0.75	0.875	0.8	0.818182	0.91
U6 snRNA-associated Sm-like protein LSm8 OS=Homo sapiens OX=9606 GN=LSM8 PE=1 SV=3	O95777	0.5	0.9	0.833333	0.642857	0.7	0.625	0.91
Superoxide dismutase [Cu-Zn] OS=Homo sapiens OX=9606 GN=SOD1 PE=1 SV=2	P00441	0.7	0.8	0.777778	0.727273	0.75	0.736842	0.91
Plasminogen OS=Homo sapiens OX=9606 GN=PLG PE=1 SV=2	P00747	0.6	0.8	0.75	0.666667	0.7	0.666667	0.91
Calpain small subunit 1 OS=Homo sapiens OX=9606 GN=CAPNS1 PE=1 SV=1	P04632	0.9	0.8	0.818182	0.888889	0.85	0.857143	0.91
Guanine nucleotide-binding protein G(k) subunit alpha OS=Homo sapiens OX=9606 GN=GNAI3 PE=1 SV=3	P08754	0.6	0.9	0.857143	0.692308	0.75	0.705882	0.91
Tropomyosin alpha-1 chain OS=Homo sapiens OX=9606 GN=TPM1 PE=1 SV=2	P09493	0.9	0.7	0.75	0.875	0.8	0.818182	0.91
Pro-cathepsin H OS=Homo sapiens OX=9606 GN=CTSH PE=1 SV=4	P09668	0.8	0.8	0.8	0.8	0.8	0.8	0.91
HLA class I histocompatibility antigen, B-58 alpha chain OS=Homo sapiens OX=9606 GN=HLA-B PE=1 SV=1	P10319	0.8	1	1	0.833333	0.9	0.888889	0.91
Microsomal glutathione S-transferase 1 OS=Homo sapiens OX=9606 GN=MGST1 PE=1 SV=1	P10620	0.8	0.9	0.888889	0.818182	0.85	0.842105	0.91
Inosine-5'-monophosphate dehydrogenase 2 OS=Homo sapiens OX=9606 GN=IMPDH2 PE=1 SV=2	P12268	0.6	0.8	0.75	0.666667	0.7	0.666667	0.91
Proto-oncogene tyrosine-protein kinase Src OS=Homo sapiens OX=9606 GN=SRC PE=1 SV=3	P12931	0.7	0.8	0.777778	0.727273	0.75	0.736842	0.91
Integrin beta-4 OS=Homo sapiens OX=9606 GN=ITGB4 PE=1 SV=5	P16144	0.9	0.8	0.818182	0.888889	0.85	0.857143	0.91
Tryptophan--tRNA ligase, cytoplasmic OS=Homo sapiens OX=9606 GN=WARS PE=1 SV=2	P23381	0.7	0.9	0.875	0.75	0.8	0.777778	0.91
Eukaryotic translation initiation factor 4B OS=Homo sapiens OX=9606 GN=EIF4B PE=1 SV=2	P23588	0.8	0.9	0.888889	0.818182	0.85	0.842105	0.91
Heme oxygenase 2 OS=Homo sapiens OX=9606 GN=HMOX2 PE=1 SV=2	P30519	0.6	0.8	0.75	0.666667	0.7	0.666667	0.91
Catenin alpha-1 OS=Homo sapiens OX=9606 GN=CTNNA1 PE=1 SV=1	P35221	0.9	0.8	0.818182	0.888889	0.85	0.857143	0.91
Signal transducer and activator of transcription 5A OS=Homo sapiens OX=9606 GN=STAT5A PE=1 SV=1	P42229	0.6	0.9	0.857143	0.692308	0.75	0.705882	0.91
Ran GTPase-activating protein 1 OS=Homo sapiens OX=9606 GN=RANGAP1 PE=1 SV=1	P46060	0.7	0.8	0.777778	0.727273	0.75	0.736842	0.91
Vesicle-fusing ATPase OS=Homo sapiens OX=9606 GN=NSF PE=1 SV=3	P46459	0.6	1	1	0.714286	0.8	0.75	0.91
60S ribosomal protein L34 OS=Homo sapiens OX=9606 GN=RPL34 PE=1 SV=3	P49207	0.7	0.8	0.777778	0.727273	0.75	0.736842	0.91
PDZ and LIM domain protein 4 OS=Homo sapiens OX=9606 GN=PDLIM4 PE=1 SV=2	P50479	1	0.6	0.714286	1	0.8	0.833333	0.91
Solute carrier family 12 member 2 OS=Homo sapiens OX=9606 GN=SLC12A2 PE=1 SV=1	P55011	0.6	0.8	0.75	0.666667	0.7	0.666667	0.91
C-terminal-binding protein 2 OS=Homo sapiens OX=9606 GN=CTBP2 PE=1 SV=1	P56545	0.9	0.9	0.9	0.9	0.9	0.9	0.91
Guanine nucleotide-binding protein G(I)/G(S)/G(T) subunit beta-1 OS=Homo sapiens OX=9606 GN=GNB1 PE=1 SV=3	P62873	0.7	0.7	0.7	0.7	0.7	0.7	0.91
60S ribosomal protein L31 OS=Homo sapiens OX=9606 GN=RPL31 PE=1 SV=1	P62899	0.7	0.8	0.777778	0.727273	0.75	0.736842	0.91
Ras-related C3 botulinum toxin substrate 1 OS=Homo sapiens OX=9606 GN=RAC1 PE=1 SV=1	P63000	0.7	0.8	0.777778	0.727273	0.75	0.736842	0.91
Platelet-activating factor acetylhydrolase IB subunit beta OS=Homo sapiens OX=9606 GN=PAFAH1B2 PE=1 SV=1	P68402	0.7	0.8	0.777778	0.727273	0.75	0.736842	0.91
Serine/threonine-protein kinase 4 OS=Homo sapiens OX=9606 GN=STK4 PE=1 SV=2	Q13043	0.7	0.7	0.7	0.7	0.7	0.7	0.91
DnaJ homolog subfamily C member 3 OS=Homo sapiens OX=9606 GN=DNAJC3 PE=1 SV=1	Q13217	0.6	1	1	0.714286	0.8	0.75	0.91
Nuclear mitotic apparatus protein 1 OS=Homo sapiens OX=9606 GN=NUMA1 PE=1 SV=2	Q14980	0.8	0.8	0.8	0.8	0.8	0.8	0.91
Monoacylglycerol lipase ABHD12 OS=Homo sapiens OX=9606 GN=ABHD12 PE=1 SV=2	Q8N2K0	0.8	0.9	0.888889	0.818182	0.85	0.842105	0.91
ATP-binding cassette sub-family F member 1 OS=Homo sapiens OX=9606 GN=ABCF1 PE=1 SV=2	Q8NE71	0.9	0.8	0.818182	0.888889	0.85	0.857143	0.91
Ubiquitin carboxyl-terminal hydrolase 7 OS=Homo sapiens OX=9606 GN=USP7 PE=1 SV=2	Q93009	0.9	0.8	0.818182	0.888889	0.85	0.857143	0.91
Cytosolic non-specific dipeptidase OS=Homo sapiens OX=9606 GN=CNDP2 PE=1 SV=2	Q96KP4	0.7	1	1	0.769231	0.85	0.823529	0.91
Aconitate hydratase, mitochondrial OS=Homo sapiens OX=9606 GN=ACO2 PE=1 SV=2	Q99798	0.7	0.9	0.875	0.75	0.8	0.777778	0.91
Inosine triphosphate pyrophosphatase OS=Homo sapiens OX=9606 GN=ITPA PE=1 SV=2	Q9BY32	0.9	0.8	0.818182	0.888889	0.85	0.857143	0.91
Normal mucosa of esophagus-specific gene 1 protein OS=Homo sapiens OX=9606 GN=NMES1 PE=1 SV=1	Q9C002	0.7	0.8	0.777778	0.727273	0.75	0.736842	0.91
5'-3' exoribonuclease 2 OS=Homo sapiens OX=9606 GN=XRN2 PE=1 SV=1	Q9H0D6	0.8	0.8	0.8	0.8	0.8	0.8	0.91
HEAT repeat-containing protein 1 OS=Homo sapiens OX=9606 GN=HEATR1 PE=1 SV=3	Q9H583	0.7	0.8	0.777778	0.727273	0.75	0.736842	0.91
Protein-glutamate O-methyltransferase OS=Homo sapiens OX=9606 GN=ARMT1 PE=1 SV=1	Q9H993	0.8	0.8	0.8	0.8	0.8	0.8	0.91
Ataxin-10 OS=Homo sapiens OX=9606 GN=ATXN10 PE=1 SV=1	Q9UBB4	0.7	0.8	0.777778	0.727273	0.75	0.736842	0.91
GTP:AMP phosphotransferase AK3, mitochondrial OS=Homo sapiens OX=9606 GN=AK3 PE=1 SV=4	Q9UIJ7	0.6	0.8	0.75	0.666667	0.7	0.666667	0.91
Apoptosis-associated speck-like protein containing a CARD OS=Homo sapiens OX=9606 GN=PYCARD PE=1 SV=2	Q9ULZ3	0.8	0.8	0.8	0.8	0.8	0.8	0.91
U6 snRNA-associated Sm-like protein LSm2 OS=Homo sapiens OX=9606 GN=LSM2 PE=1 SV=1	Q9Y333	0.7	0.9	0.875	0.75	0.8	0.777778	0.91
Junctional adhesion molecule A OS=Homo sapiens OX=9606 GN=F11R PE=1 SV=1	Q9Y624	0.7	1	1	0.769231	0.85	0.823529	0.91
Synemin OS=Homo sapiens OX=9606 GN=SYNM PE=1 SV=2	O15061	0.8	0.7	0.727273	0.777778	0.75	0.761905	0.91
Thioredoxin-like protein 1 OS=Homo sapiens OX=9606 GN=TXNL1 PE=1 SV=3	O43396	0.8	0.9	0.888889	0.818182	0.85	0.842105	0.91
Trans-Golgi network integral membrane protein 2 OS=Homo sapiens OX=9606 GN=TGOLN2 PE=1 SV=3	O43493	0.7	0.8	0.777778	0.727273	0.75	0.736842	0.91
Nucleoside diphosphate kinase A OS=Homo sapiens OX=9606 GN=NME1 PE=1 SV=1	P15531	0.7	0.7	0.7	0.7	0.7	0.7	0.91
Desmoplakin OS=Homo sapiens OX=9606 GN=DSP PE=1 SV=3	P15924	0.7	0.8	0.777778	0.727273	0.75	0.736842	0.91
ADP-ribosylation factor 4 OS=Homo sapiens OX=9606 GN=ARF4 PE=1 SV=3	P18085	0.6	0.9	0.857143	0.692308	0.75	0.705882	0.91
Ras-related protein Rab-6A OS=Homo sapiens OX=9606 GN=RAB6A PE=1 SV=3	P20340	0.7	0.7	0.7	0.7	0.7	0.7	0.91
Tenascin OS=Homo sapiens OX=9606 GN=TNC PE=1 SV=3	P24821	0.8	0.7	0.727273	0.777778	0.75	0.761905	0.91
Elongation factor 1-gamma OS=Homo sapiens OX=9606 GN=EEF1G PE=1 SV=3	P26641	0.8	0.7	0.727273	0.777778	0.75	0.761905	0.91
60S ribosomal protein L9 OS=Homo sapiens OX=9606 GN=RPL9 PE=1 SV=1	P32969	0.7	0.7	0.7	0.7	0.7	0.7	0.91
Large proline-rich protein BAG6 OS=Homo sapiens OX=9606 GN=BAG6 PE=1 SV=2	P46379	0.7	0.8	0.777778	0.727273	0.75	0.736842	0.91
Coronin-7 OS=Homo sapiens OX=9606 GN=CORO7 PE=1 SV=2	P57737	0.7	0.9	0.875	0.75	0.8	0.777778	0.91
60S ribosomal protein L15 OS=Homo sapiens OX=9606 GN=RPL15 PE=1 SV=2	P61313	0.7	0.8	0.777778	0.727273	0.75	0.736842	0.91
60S ribosomal protein L24 OS=Homo sapiens OX=9606 GN=RPL24 PE=1 SV=1	P83731	0.7	0.8	0.777778	0.727273	0.75	0.736842	0.91
Phosphoglucomutase-like protein 5 OS=Homo sapiens OX=9606 GN=PGM5 PE=1 SV=2	Q15124	0.8	0.7	0.727273	0.777778	0.75	0.761905	0.91
Elongin-B OS=Homo sapiens OX=9606 GN=ELOB PE=1 SV=1	Q15370	0.8	0.9	0.888889	0.818182	0.85	0.842105	0.91
Palladin OS=Homo sapiens OX=9606 GN=PALLD PE=1 SV=3	Q8WX93	0.8	0.7	0.727273	0.777778	0.75	0.761905	0.91
OCIA domain-containing protein 2 OS=Homo sapiens OX=9606 GN=OCIAD2 PE=1 SV=1	Q56VL3	0.1	0.9	0.5	0.5	0.5	0.166667	0.905
Regulator of microtubule dynamics protein 1 OS=Homo sapiens OX=9606 GN=RMDN1 PE=1 SV=1	Q96DB5	0.5	0.9	0.833333	0.642857	0.7	0.625	0.905
39S ribosomal protein L4, mitochondrial OS=Homo sapiens OX=9606 GN=MRPL4 PE=1 SV=1	Q9BYD3	0.9	0.9	0.9	0.9	0.9	0.9	0.905
Telomerase RNA component interacting RNase OS=Homo sapiens OX=9606 GN=TRIR PE=1 SV=1	Q9BQ61	0.7	0.9	0.875	0.75	0.8	0.777778	0.905
F-box-like/WD repeat-containing protein TBL1XR1 OS=Homo sapiens OX=9606 GN=TBL1XR1 PE=1 SV=1	Q9BZK7	0.7	0.9	0.875	0.75	0.8	0.777778	0.905
NADH dehydrogenase [ubiquinone] iron-sulfur protein 8, mitochondrial OS=Homo sapiens OX=9606 GN=NDUFS8 PE=1 SV=1	O00217	0.8	0.6	0.666667	0.75	0.7	0.727273	0.9
26S proteasome non-ATPase regulatory subunit 9 OS=Homo sapiens OX=9606 GN=PSMD9 PE=1 SV=3	O00233	1	0.6	0.714286	1	0.8	0.833333	0.9
Serine/threonine-protein phosphatase 6 catalytic subunit OS=Homo sapiens OX=9606 GN=PPP6C PE=1 SV=1	O00743	0.4	0.9	0.8	0.6	0.65	0.533333	0.9
U4/U6.U5 tri-snRNP-associated protein 1 OS=Homo sapiens OX=9606 GN=SART1 PE=1 SV=1	O43290	0.4	0.9	0.8	0.6	0.65	0.533333	0.9
AP-1 complex subunit gamma-1 OS=Homo sapiens OX=9606 GN=AP1G1 PE=1 SV=5	O43747	0.7	0.9	0.875	0.75	0.8	0.777778	0.9
Sorting nexin-2 OS=Homo sapiens OX=9606 GN=SNX2 PE=1 SV=2	O60749	0.8	1	1	0.833333	0.9	0.888889	0.9
Flotillin-1 OS=Homo sapiens OX=9606 GN=FLOT1 PE=1 SV=3	O75955	0.6	0.9	0.857143	0.692308	0.75	0.705882	0.9
Pre-mRNA-processing factor 6 OS=Homo sapiens OX=9606 GN=PRPF6 PE=1 SV=1	O94906	0.7	0.8	0.777778	0.727273	0.75	0.736842	0.9
Persulfide dioxygenase ETHE1, mitochondrial OS=Homo sapiens OX=9606 GN=ETHE1 PE=1 SV=2	O95571	0.8	0.8	0.8	0.8	0.8	0.8	0.9
Double-stranded RNA-binding protein Staufen homolog 1 OS=Homo sapiens OX=9606 GN=STAU1 PE=1 SV=2	O95793	0.7	0.9	0.875	0.75	0.8	0.777778	0.9
Mitochondrial import receptor subunit TOM40 homolog OS=Homo sapiens OX=9606 GN=TOMM40 PE=1 SV=1	O96008	0.8	1	1	0.833333	0.9	0.888889	0.9
Immunoglobulin heavy constant gamma 3 OS=Homo sapiens OX=9606 GN=IGHG3 PE=1 SV=2	P01860	0.8	0.6	0.666667	0.75	0.7	0.727273	0.9
Spectrin alpha chain, erythrocytic 1 OS=Homo sapiens OX=9606 GN=SPTA1 PE=1 SV=5	P02549	0.8	0.7	0.727273	0.777778	0.75	0.761905	0.9
Ornithine aminotransferase, mitochondrial OS=Homo sapiens OX=9606 GN=OAT PE=1 SV=1	P04181	0.6	0.8	0.75	0.666667	0.7	0.666667	0.9
Acyl-CoA-binding protein OS=Homo sapiens OX=9606 GN=DBI PE=1 SV=2	P07108	0.9	0.8	0.818182	0.888889	0.85	0.857143	0.9
DNA topoisomerase 2-alpha OS=Homo sapiens OX=9606 GN=TOP2A PE=1 SV=3	P11388	0.7	0.7	0.7	0.7	0.7	0.7	0.9
Ras-related C3 botulinum toxin substrate 2 OS=Homo sapiens OX=9606 GN=RAC2 PE=1 SV=1	P15153	0.8	0.9	0.888889	0.818182	0.85	0.842105	0.9
Fumarylacetoacetase OS=Homo sapiens OX=9606 GN=FAH PE=1 SV=2	P16930	0.8	0.9	0.888889	0.818182	0.85	0.842105	0.9
60S ribosomal protein L35a OS=Homo sapiens OX=9606 GN=RPL35A PE=1 SV=2	P18077	0.8	0.8	0.8	0.8	0.8	0.8	0.9
Neutrophil cytosol factor 2 OS=Homo sapiens OX=9606 GN=NCF2 PE=1 SV=2	P19878	0.9	0.6	0.692308	0.857143	0.75	0.782609	0.9
Galactoside 3(4)-L-fucosyltransferase OS=Homo sapiens OX=9606 GN=FUT3 PE=2 SV=1	P21217	0.8	0.9	0.888889	0.818182	0.85	0.842105	0.9
Protein-glutamine gamma-glutamyltransferase 2 OS=Homo sapiens OX=9606 GN=TGM2 PE=1 SV=2	P21980	0.6	0.7	0.666667	0.636364	0.65	0.631579	0.9
Calnexin OS=Homo sapiens OX=9606 GN=CANX PE=1 SV=2	P27824	0.6	0.9	0.857143	0.692308	0.75	0.705882	0.9
Tropomodulin-1 OS=Homo sapiens OX=9606 GN=TMOD1 PE=1 SV=1	P28289	0.9	0.9	0.9	0.9	0.9	0.9	0.9
Glycylpeptide N-tetradecanoyltransferase 1 OS=Homo sapiens OX=9606 GN=NMT1 PE=1 SV=2	P30419	0.8	0.8	0.8	0.8	0.8	0.8	0.9
DNA-directed RNA polymerase II subunit RPB2 OS=Homo sapiens OX=9606 GN=POLR2B PE=1 SV=1	P30876	0.3	0.9	0.75	0.5625	0.6	0.428571	0.9
Eukaryotic translation initiation factor 2 subunit 3 OS=Homo sapiens OX=9606 GN=EIF2S3 PE=1 SV=3	P41091	0.7	0.9	0.875	0.75	0.8	0.777778	0.9
Exosome RNA helicase MTR4 OS=Homo sapiens OX=9606 GN=MTREX PE=1 SV=3	P42285	0.8	1	1	0.833333	0.9	0.888889	0.9
Dual specificity mitogen-activated protein kinase kinase 3 OS=Homo sapiens OX=9606 GN=MAP2K3 PE=1 SV=2	P46734	0.8	1	1	0.833333	0.9	0.888889	0.9
NADH dehydrogenase [ubiquinone] flavoprotein 1, mitochondrial OS=Homo sapiens OX=9606 GN=NDUFV1 PE=1 SV=4	P49821	0.8	0.8	0.8	0.8	0.8	0.8	0.9
Rho GDP-dissociation inhibitor 1 OS=Homo sapiens OX=9606 GN=ARHGDIA PE=1 SV=3	P52565	0.7	0.8	0.777778	0.727273	0.75	0.736842	0.9
Alpha-soluble NSF attachment protein OS=Homo sapiens OX=9606 GN=NAPA PE=1 SV=3	P54920	0.8	0.7	0.727273	0.777778	0.75	0.761905	0.9
Eukaryotic translation initiation factor 4 gamma 2 OS=Homo sapiens OX=9606 GN=EIF4G2 PE=1 SV=1	P78344	0.8	0.8	0.8	0.8	0.8	0.8	0.9
Caldesmon OS=Homo sapiens OX=9606 GN=CALD1 PE=1 SV=3	Q05682	0.9	0.7	0.75	0.875	0.8	0.818182	0.9
Neutral amino acid transporter B(0) OS=Homo sapiens OX=9606 GN=SLC1A5 PE=1 SV=2	Q15758	0.7	1	1	0.769231	0.85	0.823529	0.9
Mitochondrial import receptor subunit TOM34 OS=Homo sapiens OX=9606 GN=TOMM34 PE=1 SV=2	Q15785	0.5	0.9	0.833333	0.642857	0.7	0.625	0.9
Heterochromatin protein 1-binding protein 3 OS=Homo sapiens OX=9606 GN=HP1BP3 PE=1 SV=1	Q5SSJ5	0.7	0.8	0.777778	0.727273	0.75	0.736842	0.9
Histone-arginine methyltransferase CARM1 OS=Homo sapiens OX=9606 GN=CARM1 PE=1 SV=3	Q86X55	0.4	0.9	0.8	0.6	0.65	0.533333	0.9
Plakophilin-2 OS=Homo sapiens OX=9606 GN=PKP2 PE=1 SV=2	Q99959	0.8	0.8	0.8	0.8	0.8	0.8	0.9
Tubulin-specific chaperone D OS=Homo sapiens OX=9606 GN=TBCD PE=1 SV=2	Q9BTW9	0.4	0.9	0.8	0.6	0.65	0.533333	0.9
Caseinolytic peptidase B protein homolog OS=Homo sapiens OX=9606 GN=CLPB PE=1 SV=1	Q9H078	0.5	0.9	0.833333	0.642857	0.7	0.625	0.9
Sideroflexin-1 OS=Homo sapiens OX=9606 GN=SFXN1 PE=1 SV=4	Q9H9B4	0.8	0.7	0.727273	0.777778	0.75	0.761905	0.9
ADP-ribose glycohydrolase ARH3 OS=Homo sapiens OX=9606 GN=ADPRHL2 PE=1 SV=1	Q9NX46	0.5	0.9	0.833333	0.642857	0.7	0.625	0.9
Opioid growth factor receptor OS=Homo sapiens OX=9606 GN=OGFR PE=1 SV=3	Q9NZT2	0.6	0.9	0.857143	0.692308	0.75	0.705882	0.9
Transmembrane protein 14C OS=Homo sapiens OX=9606 GN=TMEM14C PE=1 SV=1	Q9P0S9	0.7	0.9	0.875	0.75	0.8	0.777778	0.9
Calcium-binding mitochondrial carrier protein Aralar2 OS=Homo sapiens OX=9606 GN=SLC25A13 PE=1 SV=2	Q9UJS0	0.5	0.9	0.833333	0.642857	0.7	0.625	0.9
Synaptopodin-2 OS=Homo sapiens OX=9606 GN=SYNPO2 PE=1 SV=2	Q9UMS6	0.8	0.7	0.727273	0.777778	0.75	0.761905	0.9
Phenylalanine--tRNA ligase alpha subunit OS=Homo sapiens OX=9606 GN=FARSA PE=1 SV=3	Q9Y285	0.8	0.9	0.888889	0.818182	0.85	0.842105	0.9
Acyl-coenzyme A thioesterase 9, mitochondrial OS=Homo sapiens OX=9606 GN=ACOT9 PE=1 SV=2	Q9Y305	0.8	0.7	0.727273	0.777778	0.75	0.761905	0.9
Structural maintenance of chromosomes flexible hinge domain-containing protein 1 OS=Homo sapiens OX=9606 GN=SMCHD1 PE=1 SV=2	A6NHR9	0.6	0.8	0.75	0.666667	0.7	0.666667	0.9
NADH dehydrogenase [ubiquinone] iron-sulfur protein 5 OS=Homo sapiens OX=9606 GN=NDUFS5 PE=1 SV=3	O43920	0.6	0.9	0.857143	0.692308	0.75	0.705882	0.9
Endoplasmic reticulum resident protein 29 OS=Homo sapiens OX=9606 GN=ERP29 PE=1 SV=4	P30040	0.7	0.7	0.7	0.7	0.7	0.7	0.9
V-type proton ATPase subunit E 1 OS=Homo sapiens OX=9606 GN=ATP6V1E1 PE=1 SV=1	P36543	0.7	0.8	0.777778	0.727273	0.75	0.736842	0.9
Short/branched chain specific acyl-CoA dehydrogenase, mitochondrial OS=Homo sapiens OX=9606 GN=ACADSB PE=1 SV=1	P45954	0.8	0.7	0.727273	0.777778	0.75	0.761905	0.9
40S ribosomal protein S9 OS=Homo sapiens OX=9606 GN=RPS9 PE=1 SV=3	P46781	0.7	0.9	0.875	0.75	0.8	0.777778	0.9
V-type proton ATPase subunit d 1 OS=Homo sapiens OX=9606 GN=ATP6V0D1 PE=1 SV=1	P61421	0.8	0.8	0.8	0.8	0.8	0.8	0.9
60S ribosomal protein L38 OS=Homo sapiens OX=9606 GN=RPL38 PE=1 SV=2	P63173	0.7	0.8	0.777778	0.727273	0.75	0.736842	0.9
Aminoacyl tRNA synthase complex-interacting multifunctional protein 2 OS=Homo sapiens OX=9606 GN=AIMP2 PE=1 SV=2	Q13155	0.6	0.9	0.857143	0.692308	0.75	0.705882	0.9
Integrin alpha-7 OS=Homo sapiens OX=9606 GN=ITGA7 PE=1 SV=3	Q13683	0.8	0.6	0.666667	0.75	0.7	0.727273	0.9
Lipoma-preferred partner OS=Homo sapiens OX=9606 GN=LPP PE=1 SV=1	Q93052	0.8	0.7	0.727273	0.777778	0.75	0.761905	0.9
Calcium load-activated calcium channel OS=Homo sapiens OX=9606 GN=TMCO1 PE=1 SV=2	Q9UM00	0.7	0.7	0.7	0.7	0.7	0.7	0.9
Serine/arginine repetitive matrix protein 2 OS=Homo sapiens OX=9606 GN=SRRM2 PE=1 SV=2	Q9UQ35	0.3	0.9	0.75	0.5625	0.6	0.428571	0.895
Multifunctional procollagen lysine hydroxylase and glycosyltransferase LH3 OS=Homo sapiens OX=9606 GN=PLOD3 PE=1 SV=1	O60568	0.7	0.8	0.777778	0.727273	0.75	0.736842	0.89
Copine-3 OS=Homo sapiens OX=9606 GN=CPNE3 PE=1 SV=1	O75131	0.7	0.8	0.777778	0.727273	0.75	0.736842	0.89
Anterior gradient protein 2 homolog OS=Homo sapiens OX=9606 GN=AGR2 PE=1 SV=1	O95994	0.5	0.9	0.833333	0.642857	0.7	0.625	0.89
Histone H2A type 1-B/E OS=Homo sapiens OX=9606 GN=HIST1H2AB PE=1 SV=2	P04908	0.8	0.7	0.727273	0.777778	0.75	0.761905	0.89
Annexin A2 OS=Homo sapiens OX=9606 GN=ANXA2 PE=1 SV=2	P07355	0.7	0.7	0.7	0.7	0.7	0.7	0.89
Cytochrome c oxidase subunit 6C OS=Homo sapiens OX=9606 GN=COX6C PE=1 SV=2	P09669	0.7	0.7	0.7	0.7	0.7	0.7	0.89
NAD(P)H dehydrogenase [quinone] 1 OS=Homo sapiens OX=9606 GN=NQO1 PE=1 SV=1	P15559	0.9	0.8	0.818182	0.888889	0.85	0.857143	0.89
Desmin OS=Homo sapiens OX=9606 GN=DES PE=1 SV=3	P17661	0.8	0.7	0.727273	0.777778	0.75	0.761905	0.89
Inter-alpha-trypsin inhibitor heavy chain H2 OS=Homo sapiens OX=9606 GN=ITIH2 PE=1 SV=2	P19823	0.8	0.7	0.727273	0.777778	0.75	0.761905	0.89
Cathepsin S OS=Homo sapiens OX=9606 GN=CTSS PE=1 SV=3	P25774	0.5	0.9	0.833333	0.642857	0.7	0.625	0.89
Signal transducer and activator of transcription 1-alpha/beta OS=Homo sapiens OX=9606 GN=STAT1 PE=1 SV=2	P42224	0.7	0.8	0.777778	0.727273	0.75	0.736842	0.89
Elongation factor Ts, mitochondrial OS=Homo sapiens OX=9606 GN=TSFM PE=1 SV=2	P43897	0.8	0.9	0.888889	0.818182	0.85	0.842105	0.89
Histidine triad nucleotide-binding protein 1 OS=Homo sapiens OX=9606 GN=HINT1 PE=1 SV=2	P49773	0.8	0.6	0.666667	0.75	0.7	0.727273	0.89
E3 SUMO-protein ligase RanBP2 OS=Homo sapiens OX=9606 GN=RANBP2 PE=1 SV=2	P49792	0.8	0.7	0.727273	0.777778	0.75	0.761905	0.89
Puromycin-sensitive aminopeptidase OS=Homo sapiens OX=9606 GN=NPEPPS PE=1 SV=2	P55786	0.8	0.8	0.8	0.8	0.8	0.8	0.89
Microtubule-associated protein 1A OS=Homo sapiens OX=9606 GN=MAP1A PE=1 SV=6	P78559	0.8	0.9	0.888889	0.818182	0.85	0.842105	0.89
60S ribosomal protein L6 OS=Homo sapiens OX=9606 GN=RPL6 PE=1 SV=3	Q02878	0.8	0.8	0.8	0.8	0.8	0.8	0.89
Bifunctional coenzyme A synthase OS=Homo sapiens OX=9606 GN=COASY PE=1 SV=4	Q13057	0.6	0.8	0.75	0.666667	0.7	0.666667	0.89
Polyadenylate-binding protein 4 OS=Homo sapiens OX=9606 GN=PABPC4 PE=1 SV=1	Q13310	0.8	0.9	0.888889	0.818182	0.85	0.842105	0.89
Eukaryotic translation initiation factor 3 subunit A OS=Homo sapiens OX=9606 GN=EIF3A PE=1 SV=1	Q14152	0.8	0.6	0.666667	0.75	0.7	0.727273	0.89
Hydroxysteroid dehydrogenase-like protein 2 OS=Homo sapiens OX=9606 GN=HSDL2 PE=1 SV=1	Q6YN16	0.8	0.9	0.888889	0.818182	0.85	0.842105	0.89
Protein enabled homolog OS=Homo sapiens OX=9606 GN=ENAH PE=1 SV=2	Q8N8S7	0.9	0.6	0.692308	0.857143	0.75	0.782609	0.89
THO complex subunit 2 OS=Homo sapiens OX=9606 GN=THOC2 PE=1 SV=2	Q8NI27	0.9	0.9	0.9	0.9	0.9	0.9	0.89
5'(3')-deoxyribonucleotidase, cytosolic type OS=Homo sapiens OX=9606 GN=NT5C PE=1 SV=2	Q8TCD5	0.7	0.8	0.777778	0.727273	0.75	0.736842	0.89
Isochorismatase domain-containing protein 2 OS=Homo sapiens OX=9606 GN=ISOC2 PE=1 SV=1	Q96AB3	0.7	0.7	0.7	0.7	0.7	0.7	0.89
Acyl-CoA synthetase family member 2, mitochondrial OS=Homo sapiens OX=9606 GN=ACSF2 PE=1 SV=2	Q96CM8	0.6	1	1	0.714286	0.8	0.75	0.89
Tubulin alpha-1C chain OS=Homo sapiens OX=9606 GN=TUBA1C PE=1 SV=1	Q9BQE3	0.7	0.8	0.777778	0.727273	0.75	0.736842	0.89
39S ribosomal protein L45, mitochondrial OS=Homo sapiens OX=9606 GN=MRPL45 PE=1 SV=2	Q9BRJ2	0.7	0.8	0.777778	0.727273	0.75	0.736842	0.89
Exportin-5 OS=Homo sapiens OX=9606 GN=XPO5 PE=1 SV=1	Q9HAV4	0.8	0.9	0.888889	0.818182	0.85	0.842105	0.89
Ethylmalonyl-CoA decarboxylase OS=Homo sapiens OX=9606 GN=ECHDC1 PE=1 SV=2	Q9NTX5	0.5	0.8	0.714286	0.615385	0.65	0.588235	0.89
39S ribosomal protein L39, mitochondrial OS=Homo sapiens OX=9606 GN=MRPL39 PE=1 SV=3	Q9NYK5	0.9	0.8	0.818182	0.888889	0.85	0.857143	0.89
Very-long-chain (3R)-3-hydroxyacyl-CoA dehydratase 3 OS=Homo sapiens OX=9606 GN=HACD3 PE=1 SV=2	Q9P035	0.8	0.5	0.615385	0.714286	0.65	0.695652	0.89
Ras-related protein Rab-23 OS=Homo sapiens OX=9606 GN=RAB23 PE=1 SV=1	Q9ULC3	0.8	0.7	0.727273	0.777778	0.75	0.761905	0.89
RuvB-like 2 OS=Homo sapiens OX=9606 GN=RUVBL2 PE=1 SV=3	Q9Y230	0.9	0.8	0.818182	0.888889	0.85	0.857143	0.89
Nuclear migration protein nudC OS=Homo sapiens OX=9606 GN=NUDC PE=1 SV=1	Q9Y266	0.8	0.7	0.727273	0.777778	0.75	0.761905	0.89
Ribosome maturation protein SBDS OS=Homo sapiens OX=9606 GN=SBDS PE=1 SV=4	Q9Y3A5	0.8	0.6	0.666667	0.75	0.7	0.727273	0.89
Transmembrane emp24 domain-containing protein 5 OS=Homo sapiens OX=9606 GN=TMED5 PE=1 SV=1	Q9Y3A6	0.8	0.9	0.888889	0.818182	0.85	0.842105	0.89
Transmembrane emp24 domain-containing protein 7 OS=Homo sapiens OX=9606 GN=TMED7 PE=1 SV=2	Q9Y3B3	0.6	0.9	0.857143	0.692308	0.75	0.705882	0.89
Core histone macro-H2A.1 OS=Homo sapiens OX=9606 GN=H2AFY PE=1 SV=4	O75367	0.8	0.8	0.8	0.8	0.8	0.8	0.89
Cold shock domain-containing protein E1 OS=Homo sapiens OX=9606 GN=CSDE1 PE=1 SV=2	O75534	0.7	0.6	0.636364	0.666667	0.65	0.666667	0.89
Calpain-1 catalytic subunit OS=Homo sapiens OX=9606 GN=CAPN1 PE=1 SV=1	P07384	0.7	0.8	0.777778	0.727273	0.75	0.736842	0.89
60S ribosomal protein L4 OS=Homo sapiens OX=9606 GN=RPL4 PE=1 SV=5	P36578	0.8	0.6	0.666667	0.75	0.7	0.727273	0.89
Ras GTPase-activating-like protein IQGAP1 OS=Homo sapiens OX=9606 GN=IQGAP1 PE=1 SV=1	P46940	0.7	0.9	0.875	0.75	0.8	0.777778	0.89
Prefoldin subunit 3 OS=Homo sapiens OX=9606 GN=VBP1 PE=1 SV=4	P61758	0.7	0.8	0.777778	0.727273	0.75	0.736842	0.89
Dynein light chain 1, cytoplasmic OS=Homo sapiens OX=9606 GN=DYNLL1 PE=1 SV=1	P63167	0.8	0.8	0.8	0.8	0.8	0.8	0.89
Adenylyl cyclase-associated protein 1 OS=Homo sapiens OX=9606 GN=CAP1 PE=1 SV=5	Q01518	0.7	0.8	0.777778	0.727273	0.75	0.736842	0.89
Lactoylglutathione lyase OS=Homo sapiens OX=9606 GN=GLO1 PE=1 SV=4	Q04760	0.7	0.7	0.7	0.7	0.7	0.7	0.89
Endoplasmic reticulum resident protein 44 OS=Homo sapiens OX=9606 GN=ERP44 PE=1 SV=1	Q9BS26	0.6	0.8	0.75	0.666667	0.7	0.666667	0.89
EH domain-containing protein 4 OS=Homo sapiens OX=9606 GN=EHD4 PE=1 SV=1	Q9H223	0.7	0.9	0.875	0.75	0.8	0.777778	0.89
Coatomer subunit gamma-1 OS=Homo sapiens OX=9606 GN=COPG1 PE=1 SV=1	Q9Y678	0.7	0.8	0.777778	0.727273	0.75	0.736842	0.89
E3 ubiquitin-protein ligase TRIM21 OS=Homo sapiens OX=9606 GN=TRIM21 PE=1 SV=1	P19474	0.7	0.9	0.875	0.75	0.8	0.777778	0.885
Cleavage stimulation factor subunit 1 OS=Homo sapiens OX=9606 GN=CSTF1 PE=1 SV=1	Q05048	0.7	0.9	0.875	0.75	0.8	0.777778	0.885
PHD finger-like domain-containing protein 5A OS=Homo sapiens OX=9606 GN=PHF5A PE=1 SV=1	Q7RTV0	0.3	0.9	0.75	0.5625	0.6	0.428571	0.885
Transmembrane protein 70, mitochondrial OS=Homo sapiens OX=9606 GN=TMEM70 PE=1 SV=2	Q9BUB7	0.7	0.9	0.875	0.75	0.8	0.777778	0.885
Small glutamine-rich tetratricopeptide repeat-containing protein alpha OS=Homo sapiens OX=9606 GN=SGTA PE=1 SV=1	O43765	0.8	0.7	0.727273	0.777778	0.75	0.761905	0.88
L-lactate dehydrogenase A chain OS=Homo sapiens OX=9606 GN=LDHA PE=1 SV=2	P00338	0.6	0.6	0.6	0.6	0.6	0.6	0.88
Cytochrome c oxidase subunit 2 OS=Homo sapiens OX=9606 GN=MT-CO2 PE=1 SV=1	P00403	0.7	0.7	0.7	0.7	0.7	0.7	0.88
Kininogen-1 OS=Homo sapiens OX=9606 GN=KNG1 PE=1 SV=2	P01042	0.6	0.7	0.666667	0.636364	0.65	0.631579	0.88
Dolichyl-diphosphooligosaccharide--protein glycosyltransferase subunit 1 OS=Homo sapiens OX=9606 GN=RPN1 PE=1 SV=1	P04843	0.6	0.8	0.75	0.666667	0.7	0.666667	0.88
Complement component C8 gamma chain OS=Homo sapiens OX=9606 GN=C8G PE=1 SV=3	P07360	0.7	0.7	0.7	0.7	0.7	0.7	0.88
Sulfotransferase 1A4 OS=Homo sapiens OX=9606 GN=SULT1A4 PE=1 SV=1	P0DMN0	0.7	0.8	0.777778	0.727273	0.75	0.736842	0.88
Plasma membrane calcium-transporting ATPase 4 OS=Homo sapiens OX=9606 GN=ATP2B4 PE=1 SV=2	P23634	0.6	0.6	0.6	0.6	0.6	0.6	0.88
Valine--tRNA ligase OS=Homo sapiens OX=9606 GN=VARS PE=1 SV=4	P26640	0.7	0.8	0.777778	0.727273	0.75	0.736842	0.88
Microtubule-associated protein 4 OS=Homo sapiens OX=9606 GN=MAP4 PE=1 SV=3	P27816	0.7	0.6	0.636364	0.666667	0.65	0.666667	0.88
S-adenosylmethionine synthase isoform type-2 OS=Homo sapiens OX=9606 GN=MAT2A PE=1 SV=1	P31153	0.8	0.8	0.8	0.8	0.8	0.8	0.88
60S ribosomal protein L27a OS=Homo sapiens OX=9606 GN=RPL27A PE=1 SV=2	P46776	0.6	0.7	0.666667	0.636364	0.65	0.631579	0.88
Coatomer subunit beta OS=Homo sapiens OX=9606 GN=COPB1 PE=1 SV=3	P53618	0.8	0.7	0.727273	0.777778	0.75	0.761905	0.88
Coatomer subunit alpha OS=Homo sapiens OX=9606 GN=COPA PE=1 SV=2	P53621	0.7	0.8	0.777778	0.727273	0.75	0.736842	0.88
60S ribosomal protein L26 OS=Homo sapiens OX=9606 GN=RPL26 PE=1 SV=1	P61254	0.6	0.7	0.666667	0.636364	0.65	0.631579	0.88
Serine/threonine-protein phosphatase 2A 55 kDa regulatory subunit B alpha isoform OS=Homo sapiens OX=9606 GN=PPP2R2A PE=1 SV=1	P63151	0.7	0.8	0.777778	0.727273	0.75	0.736842	0.88
Histone-binding protein RBBP4 OS=Homo sapiens OX=9606 GN=RBBP4 PE=1 SV=3	Q09028	0.6	0.8	0.75	0.666667	0.7	0.666667	0.88
Serine/threonine-protein kinase PRP4 homolog OS=Homo sapiens OX=9606 GN=PRPF4B PE=1 SV=3	Q13523	0.6	0.7	0.666667	0.636364	0.65	0.631579	0.88
Filamin-C OS=Homo sapiens OX=9606 GN=FLNC PE=1 SV=3	Q14315	0.8	0.7	0.727273	0.777778	0.75	0.761905	0.88
Protein RRP5 homolog OS=Homo sapiens OX=9606 GN=PDCD11 PE=1 SV=3	Q14690	0.8	0.8	0.8	0.8	0.8	0.8	0.88
116 kDa U5 small nuclear ribonucleoprotein component OS=Homo sapiens OX=9606 GN=EFTUD2 PE=1 SV=1	Q15029	0.6	0.8	0.75	0.666667	0.7	0.666667	0.88
Protein phosphatase 1 regulatory subunit 7 OS=Homo sapiens OX=9606 GN=PPP1R7 PE=1 SV=1	Q15435	0.7	0.8	0.777778	0.727273	0.75	0.736842	0.88
Vesicle-associated membrane protein 3 OS=Homo sapiens OX=9606 GN=VAMP3 PE=1 SV=3	Q15836	0.5	0.8	0.714286	0.615385	0.65	0.588235	0.88
Serine/threonine-protein phosphatase 6 regulatory subunit 3 OS=Homo sapiens OX=9606 GN=PPP6R3 PE=1 SV=2	Q5H9R7	0.7	0.9	0.875	0.75	0.8	0.777778	0.88
BRO1 domain-containing protein BROX OS=Homo sapiens OX=9606 GN=BROX PE=1 SV=1	Q5VW32	0.6	0.8	0.75	0.666667	0.7	0.666667	0.88
Neuronal growth regulator 1 OS=Homo sapiens OX=9606 GN=NEGR1 PE=1 SV=3	Q7Z3B1	0.9	0.6	0.692308	0.857143	0.75	0.782609	0.88
Histone H2B type 3-B OS=Homo sapiens OX=9606 GN=HIST3H2BB PE=1 SV=3	Q8N257	0.6	0.7	0.666667	0.636364	0.65	0.631579	0.88
Importin-9 OS=Homo sapiens OX=9606 GN=IPO9 PE=1 SV=3	Q96P70	0.7	0.9	0.875	0.75	0.8	0.777778	0.88
Protein phosphatase 1 regulatory subunit 12C OS=Homo sapiens OX=9606 GN=PPP1R12C PE=1 SV=1	Q9BZL4	0.8	0.8	0.8	0.8	0.8	0.8	0.88
SH3 domain-binding glutamic acid-rich-like protein 3 OS=Homo sapiens OX=9606 GN=SH3BGRL3 PE=1 SV=1	Q9H299	0.6	0.9	0.857143	0.692308	0.75	0.705882	0.88
PDZ and LIM domain protein 7 OS=Homo sapiens OX=9606 GN=PDLIM7 PE=1 SV=1	Q9NR12	0.8	0.7	0.727273	0.777778	0.75	0.761905	0.88
THUMP domain-containing protein 1 OS=Homo sapiens OX=9606 GN=THUMPD1 PE=1 SV=2	Q9NXG2	0.6	0.9	0.857143	0.692308	0.75	0.705882	0.88
Protein CDV3 homolog OS=Homo sapiens OX=9606 GN=CDV3 PE=1 SV=1	Q9UKY7	0.4	1	1	0.625	0.7	0.571429	0.88
Mannose-P-dolichol utilization defect 1 protein OS=Homo sapiens OX=9606 GN=MPDU1 PE=1 SV=2	O75352	0.6	0.7	0.666667	0.636364	0.65	0.631579	0.88
Tissue alpha-L-fucosidase OS=Homo sapiens OX=9606 GN=FUCA1 PE=1 SV=4	P04066	0.7	0.8	0.777778	0.727273	0.75	0.736842	0.88
Integrin alpha-2 OS=Homo sapiens OX=9606 GN=ITGA2 PE=1 SV=1	P17301	0.8	0.9	0.888889	0.818182	0.85	0.842105	0.88
Platelet-activating factor acetylhydrolase IB subunit alpha OS=Homo sapiens OX=9606 GN=PAFAH1B1 PE=1 SV=2	P43034	0.5	0.8	0.714286	0.615385	0.65	0.588235	0.88
Cysteine--tRNA ligase, cytoplasmic OS=Homo sapiens OX=9606 GN=CARS PE=1 SV=3	P49589	0.8	0.9	0.888889	0.818182	0.85	0.842105	0.88
Ras-related protein Rab-7a OS=Homo sapiens OX=9606 GN=RAB7A PE=1 SV=1	P51149	0.7	0.8	0.777778	0.727273	0.75	0.736842	0.88
Translocon-associated protein subunit delta OS=Homo sapiens OX=9606 GN=SSR4 PE=1 SV=1	P51571	0.6	0.9	0.857143	0.692308	0.75	0.705882	0.88
Nuclear transport factor 2 OS=Homo sapiens OX=9606 GN=NUTF2 PE=1 SV=1	P61970	0.8	0.8	0.8	0.8	0.8	0.8	0.88
40S ribosomal protein S26 OS=Homo sapiens OX=9606 GN=RPS26 PE=1 SV=3	P62854	0.7	0.8	0.777778	0.727273	0.75	0.736842	0.88
28S ribosomal protein S9, mitochondrial OS=Homo sapiens OX=9606 GN=MRPS9 PE=1 SV=2	P82933	0.6	0.8	0.75	0.666667	0.7	0.666667	0.88
Delta(3,5)-Delta(2,4)-dienoyl-CoA isomerase, mitochondrial OS=Homo sapiens OX=9606 GN=ECH1 PE=1 SV=2	Q13011	0.8	0.7	0.727273	0.777778	0.75	0.761905	0.88
Cytoskeleton-associated protein 5 OS=Homo sapiens OX=9606 GN=CKAP5 PE=1 SV=3	Q14008	0.8	0.7	0.727273	0.777778	0.75	0.761905	0.88
Dolichyl-diphosphooligosaccharide--protein glycosyltransferase subunit STT3B OS=Homo sapiens OX=9606 GN=STT3B PE=1 SV=1	Q8TCJ2	0.7	0.9	0.875	0.75	0.8	0.777778	0.88
3-hydroxyacyl-CoA dehydrogenase type-2 OS=Homo sapiens OX=9606 GN=HSD17B10 PE=1 SV=3	Q99714	0.6	0.7	0.666667	0.636364	0.65	0.631579	0.88
5-oxoprolinase OS=Homo sapiens OX=9606 GN=OPLAH PE=1 SV=3	O14841	0.5	0.9	0.833333	0.642857	0.7	0.625	0.875
Thimet oligopeptidase OS=Homo sapiens OX=9606 GN=THOP1 PE=1 SV=2	P52888	0.5	0.9	0.833333	0.642857	0.7	0.625	0.875
Nuclear protein localization protein 4 homolog OS=Homo sapiens OX=9606 GN=NPLOC4 PE=1 SV=3	Q8TAT6	0.3	0.9	0.75	0.5625	0.6	0.428571	0.875
Heat shock protein beta-6 OS=Homo sapiens OX=9606 GN=HSPB6 PE=1 SV=2	O14558	0.7	0.7	0.7	0.7	0.7	0.7	0.87
AP-3 complex subunit delta-1 OS=Homo sapiens OX=9606 GN=AP3D1 PE=1 SV=1	O14617	0.5	0.9	0.833333	0.642857	0.7	0.625	0.87
Importin subunit alpha-7 OS=Homo sapiens OX=9606 GN=KPNA6 PE=1 SV=1	O60684	0.4	0.9	0.8	0.6	0.65	0.533333	0.87
Dolichol-phosphate mannosyltransferase subunit 1 OS=Homo sapiens OX=9606 GN=DPM1 PE=1 SV=1	O60762	0.7	0.9	0.875	0.75	0.8	0.777778	0.87
Eukaryotic translation initiation factor 5B OS=Homo sapiens OX=9606 GN=EIF5B PE=1 SV=4	O60841	0.6	0.7	0.666667	0.636364	0.65	0.631579	0.87
Apolipoprotein C-III OS=Homo sapiens OX=9606 GN=APOC3 PE=1 SV=1	P02656	0.7	0.7	0.7	0.7	0.7	0.7	0.87
Propionyl-CoA carboxylase alpha chain, mitochondrial OS=Homo sapiens OX=9606 GN=PCCA PE=1 SV=4	P05165	0.5	0.8	0.714286	0.615385	0.65	0.588235	0.87
Dihydropteridine reductase OS=Homo sapiens OX=9606 GN=QDPR PE=1 SV=2	P09417	0.7	0.7	0.7	0.7	0.7	0.7	0.87
Ubiquitin carboxyl-terminal hydrolase isozyme L1 OS=Homo sapiens OX=9606 GN=UCHL1 PE=1 SV=2	P09936	0.7	0.7	0.7	0.7	0.7	0.7	0.87
Leukotriene A-4 hydrolase OS=Homo sapiens OX=9606 GN=LTA4H PE=1 SV=2	P09960	0.7	0.7	0.7	0.7	0.7	0.7	0.87
Histone H2A.Z OS=Homo sapiens OX=9606 GN=H2AFZ PE=1 SV=2	P0C0S5	0.6	0.9	0.857143	0.692308	0.75	0.705882	0.87
Serum amyloid A-1 protein OS=Homo sapiens OX=9606 GN=SAA1 PE=1 SV=1	P0DJI8	0.8	0.8	0.8	0.8	0.8	0.8	0.87
Lysosomal protective protein OS=Homo sapiens OX=9606 GN=CTSA PE=1 SV=2	P10619	0.6	0.7	0.666667	0.636364	0.65	0.631579	0.87
Collagen alpha-3(VI) chain OS=Homo sapiens OX=9606 GN=COL6A3 PE=1 SV=5	P12111	0.7	0.7	0.7	0.7	0.7	0.7	0.87
Protein disulfide-isomerase A4 OS=Homo sapiens OX=9606 GN=PDIA4 PE=1 SV=2	P13667	0.7	0.9	0.875	0.75	0.8	0.777778	0.87
Translationally-controlled tumor protein OS=Homo sapiens OX=9606 GN=TPT1 PE=1 SV=1	P13693	0.7	0.8	0.777778	0.727273	0.75	0.736842	0.87
Pyruvate kinase PKM OS=Homo sapiens OX=9606 GN=PKM PE=1 SV=4	P14618	0.8	0.9	0.888889	0.818182	0.85	0.842105	0.87
NADH dehydrogenase [ubiquinone] flavoprotein 2, mitochondrial OS=Homo sapiens OX=9606 GN=NDUFV2 PE=1 SV=2	P19404	0.7	0.6	0.636364	0.666667	0.65	0.666667	0.87
Inter-alpha-trypsin inhibitor heavy chain H1 OS=Homo sapiens OX=9606 GN=ITIH1 PE=1 SV=3	P19827	0.8	0.8	0.8	0.8	0.8	0.8	0.87
Filamin-A OS=Homo sapiens OX=9606 GN=FLNA PE=1 SV=4	P21333	0.8	0.7	0.727273	0.777778	0.75	0.761905	0.87
Thromboxane-A synthase OS=Homo sapiens OX=9606 GN=TBXAS1 PE=1 SV=3	P24557	0.7	0.9	0.875	0.75	0.8	0.777778	0.87
ATP-binding cassette sub-family D member 3 OS=Homo sapiens OX=9606 GN=ABCD3 PE=1 SV=1	P28288	0.7	0.9	0.875	0.75	0.8	0.777778	0.87
Cytochrome b-c1 complex subunit 1, mitochondrial OS=Homo sapiens OX=9606 GN=UQCRC1 PE=1 SV=3	P31930	0.6	0.8	0.75	0.666667	0.7	0.666667	0.87
Serpin B5 OS=Homo sapiens OX=9606 GN=SERPINB5 PE=1 SV=2	P36952	0.8	0.7	0.727273	0.777778	0.75	0.761905	0.87
Ubiquitin carboxyl-terminal hydrolase 5 OS=Homo sapiens OX=9606 GN=USP5 PE=1 SV=2	P45974	0.6	0.9	0.857143	0.692308	0.75	0.705882	0.87
Glutamate--cysteine ligase catalytic subunit OS=Homo sapiens OX=9606 GN=GCLC PE=1 SV=2	P48506	0.6	0.7	0.666667	0.636364	0.65	0.631579	0.87
Protein farnesyltransferase/geranylgeranyltransferase type-1 subunit alpha OS=Homo sapiens OX=9606 GN=FNTA PE=1 SV=1	P49354	0.6	0.8	0.75	0.666667	0.7	0.666667	0.87
Transmembrane emp24 domain-containing protein 10 OS=Homo sapiens OX=9606 GN=TMED10 PE=1 SV=2	P49755	0.7	0.9	0.875	0.75	0.8	0.777778	0.87
Activated RNA polymerase II transcriptional coactivator p15 OS=Homo sapiens OX=9606 GN=SUB1 PE=1 SV=3	P53999	0.8	0.8	0.8	0.8	0.8	0.8	0.87
Ubiquitin carboxyl-terminal hydrolase 14 OS=Homo sapiens OX=9606 GN=USP14 PE=1 SV=3	P54578	0.7	0.6	0.636364	0.666667	0.65	0.666667	0.87
Adenosine kinase OS=Homo sapiens OX=9606 GN=ADK PE=1 SV=2	P55263	0.7	0.7	0.7	0.7	0.7	0.7	0.87
Ras-related protein Rab-10 OS=Homo sapiens OX=9606 GN=RAB10 PE=1 SV=1	P61026	0.7	0.6	0.636364	0.666667	0.65	0.666667	0.87
Signal peptidase complex catalytic subunit SEC11A OS=Homo sapiens OX=9606 GN=SEC11A PE=1 SV=1	P67812	0.7	0.8	0.777778	0.727273	0.75	0.736842	0.87
RNA-binding protein 3 OS=Homo sapiens OX=9606 GN=RBM3 PE=1 SV=1	P98179	0.6	0.7	0.666667	0.636364	0.65	0.631579	0.87
Heat shock protein 75 kDa, mitochondrial OS=Homo sapiens OX=9606 GN=TRAP1 PE=1 SV=3	Q12931	0.8	0.8	0.8	0.8	0.8	0.8	0.87
Ras suppressor protein 1 OS=Homo sapiens OX=9606 GN=RSU1 PE=1 SV=3	Q15404	0.5	0.7	0.625	0.583333	0.6	0.555556	0.87
Drebrin OS=Homo sapiens OX=9606 GN=DBN1 PE=1 SV=4	Q16643	0.5	0.7	0.625	0.583333	0.6	0.555556	0.87
Lanosterol 14-alpha demethylase OS=Homo sapiens OX=9606 GN=CYP51A1 PE=1 SV=3	Q16850	0.8	0.9	0.888889	0.818182	0.85	0.842105	0.87
PDZ and LIM domain protein 3 OS=Homo sapiens OX=9606 GN=PDLIM3 PE=1 SV=1	Q53GG5	0.9	0.7	0.75	0.875	0.8	0.818182	0.87
Endoribonuclease LACTB2 OS=Homo sapiens OX=9606 GN=LACTB2 PE=1 SV=2	Q53H82	0.8	0.8	0.8	0.8	0.8	0.8	0.87
Gasdermin-B OS=Homo sapiens OX=9606 GN=GSDMB PE=1 SV=2	Q8TAX9	0.8	0.9	0.888889	0.818182	0.85	0.842105	0.87
Anterior gradient protein 3 OS=Homo sapiens OX=9606 GN=AGR3 PE=1 SV=1	Q8TD06	0.7	0.7	0.7	0.7	0.7	0.7	0.87
Protein TFG OS=Homo sapiens OX=9606 GN=TFG PE=1 SV=2	Q92734	0.7	0.8	0.777778	0.727273	0.75	0.736842	0.87
Protein unc-45 homolog A OS=Homo sapiens OX=9606 GN=UNC45A PE=1 SV=1	Q9H3U1	0.8	0.8	0.8	0.8	0.8	0.8	0.87
Fructose-2,6-bisphosphatase TIGAR OS=Homo sapiens OX=9606 GN=TIGAR PE=1 SV=1	Q9NQ88	0.8	0.8	0.8	0.8	0.8	0.8	0.87
Kinesin-like protein KIF13B OS=Homo sapiens OX=9606 GN=KIF13B PE=1 SV=2	Q9NQT8	0.6	0.8	0.75	0.666667	0.7	0.666667	0.87
Vesicle-associated membrane protein-associated protein A OS=Homo sapiens OX=9606 GN=VAPA PE=1 SV=3	Q9P0L0	0.8	0.8	0.8	0.8	0.8	0.8	0.87
SUMO-activating enzyme subunit 1 OS=Homo sapiens OX=9606 GN=SAE1 PE=1 SV=1	Q9UBE0	0.8	0.9	0.888889	0.818182	0.85	0.842105	0.87
ATP-binding cassette sub-family F member 2 OS=Homo sapiens OX=9606 GN=ABCF2 PE=1 SV=2	Q9UG63	0.7	0.9	0.875	0.75	0.8	0.777778	0.87
Multifunctional methyltransferase subunit TRM112-like protein OS=Homo sapiens OX=9606 GN=TRMT112 PE=1 SV=1	Q9UI30	0.8	0.8	0.8	0.8	0.8	0.8	0.87
Coronin-1C OS=Homo sapiens OX=9606 GN=CORO1C PE=1 SV=1	Q9ULV4	0.7	0.7	0.7	0.7	0.7	0.7	0.87
Pre-mRNA-processing factor 19 OS=Homo sapiens OX=9606 GN=PRPF19 PE=1 SV=1	Q9UMS4	0.8	0.8	0.8	0.8	0.8	0.8	0.87
Transducin beta-like protein 2 OS=Homo sapiens OX=9606 GN=TBL2 PE=1 SV=1	Q9Y4P3	0.7	0.9	0.875	0.75	0.8	0.777778	0.87
Signal recognition particle receptor subunit beta OS=Homo sapiens OX=9606 GN=SRPRB PE=1 SV=3	Q9Y5M8	0.7	0.9	0.875	0.75	0.8	0.777778	0.87
Mitochondrial carrier homolog 2 OS=Homo sapiens OX=9606 GN=MTCH2 PE=1 SV=1	Q9Y6C9	0.8	0.8	0.8	0.8	0.8	0.8	0.87
Ragulator complex protein LAMTOR5 OS=Homo sapiens OX=9606 GN=LAMTOR5 PE=1 SV=1	O43504	0.6	1	1	0.714286	0.8	0.75	0.87
Immunoglobulin kappa variable 4-1 OS=Homo sapiens OX=9606 GN=IGKV4-1 PE=1 SV=1	P06312	0.8	0.7	0.727273	0.777778	0.75	0.761905	0.87
Elongation factor 2 OS=Homo sapiens OX=9606 GN=EEF2 PE=1 SV=4	P13639	0.7	0.6	0.636364	0.666667	0.65	0.666667	0.87
Glucosidase 2 subunit beta OS=Homo sapiens OX=9606 GN=PRKCSH PE=1 SV=2	P14314	0.6	0.9	0.857143	0.692308	0.75	0.705882	0.87
60S ribosomal protein L28 OS=Homo sapiens OX=9606 GN=RPL28 PE=1 SV=3	P46779	0.7	0.6	0.636364	0.666667	0.65	0.666667	0.87
Host cell factor 1 OS=Homo sapiens OX=9606 GN=HCFC1 PE=1 SV=2	P51610	0.7	1	1	0.769231	0.85	0.823529	0.87
Tripartite motif-containing protein 29 OS=Homo sapiens OX=9606 GN=TRIM29 PE=1 SV=2	Q14134	0.7	0.7	0.7	0.7	0.7	0.7	0.87
Zinc finger CCCH-type antiviral protein 1 OS=Homo sapiens OX=9606 GN=ZC3HAV1 PE=1 SV=3	Q7Z2W4	0.7	0.6	0.636364	0.666667	0.65	0.666667	0.87
Histone H2A type 2-B OS=Homo sapiens OX=9606 GN=HIST2H2AB PE=1 SV=3	Q8IUE6	0.7	0.8	0.777778	0.727273	0.75	0.736842	0.87
NADH-cytochrome b5 reductase 1 OS=Homo sapiens OX=9606 GN=CYB5R1 PE=1 SV=1	Q9UHQ9	0.7	0.7	0.7	0.7	0.7	0.7	0.87
28S ribosomal protein S27, mitochondrial OS=Homo sapiens OX=9606 GN=MRPS27 PE=1 SV=3	Q92552	0	0.3	0	0.230769	0.15		0.865
26S proteasome non-ATPase regulatory subunit 14 OS=Homo sapiens OX=9606 GN=PSMD14 PE=1 SV=1	O00487	0.6	0.6	0.6	0.6	0.6	0.6	0.86
Lysosomal alpha-mannosidase OS=Homo sapiens OX=9606 GN=MAN2B1 PE=1 SV=3	O00754	0.6	0.9	0.857143	0.692308	0.75	0.705882	0.86
Microsomal glutathione S-transferase 3 OS=Homo sapiens OX=9606 GN=MGST3 PE=1 SV=1	O14880	0.8	0.8	0.8	0.8	0.8	0.8	0.86
Ubiquitin/ISG15-conjugating enzyme E2 L6 OS=Homo sapiens OX=9606 GN=UBE2L6 PE=1 SV=4	O14933	0.7	0.8	0.777778	0.727273	0.75	0.736842	0.86
Myosin regulatory light chain 12B OS=Homo sapiens OX=9606 GN=MYL12B PE=1 SV=2	O14950	0.5	0.8	0.714286	0.615385	0.65	0.588235	0.86
U3 small nucleolar RNA-interacting protein 2 OS=Homo sapiens OX=9606 GN=RRP9 PE=1 SV=1	O43818	0.8	0.7	0.727273	0.777778	0.75	0.761905	0.86
Diacylglycerol O-acyltransferase 1 OS=Homo sapiens OX=9606 GN=DGAT1 PE=1 SV=2	O75907	0.4	0.9	0.8	0.6	0.65	0.533333	0.86
Protein transport protein Sec24B OS=Homo sapiens OX=9606 GN=SEC24B PE=1 SV=2	O95487	0.4	0.8	0.666667	0.571429	0.6	0.5	0.86
BAG family molecular chaperone regulator 3 OS=Homo sapiens OX=9606 GN=BAG3 PE=1 SV=3	O95817	0.7	0.7	0.7	0.7	0.7	0.7	0.86
Alpha-2-HS-glycoprotein OS=Homo sapiens OX=9606 GN=AHSG PE=1 SV=2	P02765	0.6	0.7	0.666667	0.636364	0.65	0.631579	0.86
Fatty acid-binding protein, liver OS=Homo sapiens OX=9606 GN=FABP1 PE=1 SV=1	P07148	0.6	0.7	0.666667	0.636364	0.65	0.631579	0.86
Beta-hexosaminidase subunit beta OS=Homo sapiens OX=9606 GN=HEXB PE=1 SV=3	P07686	0.5	0.9	0.833333	0.642857	0.7	0.625	0.86
Ras-related protein R-Ras OS=Homo sapiens OX=9606 GN=RRAS PE=1 SV=1	P10301	0.7	0.7	0.7	0.7	0.7	0.7	0.86
S-formylglutathione hydrolase OS=Homo sapiens OX=9606 GN=ESD PE=1 SV=2	P10768	0.7	0.6	0.636364	0.666667	0.65	0.666667	0.86
Laminin subunit gamma-1 OS=Homo sapiens OX=9606 GN=LAMC1 PE=1 SV=3	P11047	0.7	0.6	0.636364	0.666667	0.65	0.666667	0.86
Lysosome-associated membrane glycoprotein 1 OS=Homo sapiens OX=9606 GN=LAMP1 PE=1 SV=3	P11279	0.8	0.7	0.727273	0.777778	0.75	0.761905	0.86
Tenascin-X OS=Homo sapiens OX=9606 GN=TNXB PE=1 SV=5	P22105	0.8	0.7	0.727273	0.777778	0.75	0.761905	0.86
Fibulin-1 OS=Homo sapiens OX=9606 GN=FBLN1 PE=1 SV=4	P23142	0.5	0.7	0.625	0.583333	0.6	0.555556	0.86
Elongation factor 1-beta OS=Homo sapiens OX=9606 GN=EEF1B2 PE=1 SV=3	P24534	0.7	0.8	0.777778	0.727273	0.75	0.736842	0.86
Proteasome subunit beta type-5 OS=Homo sapiens OX=9606 GN=PSMB5 PE=1 SV=3	P28074	0.8	0.7	0.727273	0.777778	0.75	0.761905	0.86
Transketolase OS=Homo sapiens OX=9606 GN=TKT PE=1 SV=3	P29401	0.8	0.9	0.888889	0.818182	0.85	0.842105	0.86
Leukocyte elastase inhibitor OS=Homo sapiens OX=9606 GN=SERPINB1 PE=1 SV=1	P30740	0.6	0.8	0.75	0.666667	0.7	0.666667	0.86
Signal recognition particle 14 kDa protein OS=Homo sapiens OX=9606 GN=SRP14 PE=1 SV=2	P37108	0.7	0.7	0.7	0.7	0.7	0.7	0.86
Cell surface glycoprotein MUC18 OS=Homo sapiens OX=9606 GN=MCAM PE=1 SV=2	P43121	0.7	0.7	0.7	0.7	0.7	0.7	0.86
Adapter molecule crk OS=Homo sapiens OX=9606 GN=CRK PE=1 SV=2	P46108	0.6	0.9	0.857143	0.692308	0.75	0.705882	0.86
Glucosamine-6-phosphate isomerase 1 OS=Homo sapiens OX=9606 GN=GNPDA1 PE=1 SV=1	P46926	0.5	0.8	0.714286	0.615385	0.65	0.588235	0.86
Coatomer subunit delta OS=Homo sapiens OX=9606 GN=ARCN1 PE=1 SV=1	P48444	0.6	0.9	0.857143	0.692308	0.75	0.705882	0.86
Fragile X mental retardation syndrome-related protein 1 OS=Homo sapiens OX=9606 GN=FXR1 PE=1 SV=3	P51114	0.4	0.9	0.8	0.6	0.65	0.533333	0.86
B-cell receptor-associated protein 31 OS=Homo sapiens OX=9606 GN=BCAP31 PE=1 SV=3	P51572	0.7	0.7	0.7	0.7	0.7	0.7	0.86
Myosin light polypeptide 6 OS=Homo sapiens OX=9606 GN=MYL6 PE=1 SV=2	P60660	0.7	0.7	0.7	0.7	0.7	0.7	0.86
60S ribosomal protein L8 OS=Homo sapiens OX=9606 GN=RPL8 PE=1 SV=2	P62917	0.6	0.6	0.6	0.6	0.6	0.6	0.86
Peptidyl-prolyl cis-trans isomerase FKBP1A OS=Homo sapiens OX=9606 GN=FKBP1A PE=1 SV=2	P62942	0.6	0.6	0.6	0.6	0.6	0.6	0.86
Basement membrane-specific heparan sulfate proteoglycan core protein OS=Homo sapiens OX=9606 GN=HSPG2 PE=1 SV=4	P98160	0.8	0.7	0.727273	0.777778	0.75	0.761905	0.86
Interferon-induced transmembrane protein 3 OS=Homo sapiens OX=9606 GN=IFITM3 PE=1 SV=2	Q01628	0.7	0.7	0.7	0.7	0.7	0.7	0.86
Ubiquitin carboxyl-terminal hydrolase 10 OS=Homo sapiens OX=9606 GN=USP10 PE=1 SV=2	Q14694	0.8	0.9	0.888889	0.818182	0.85	0.842105	0.86
Splicing factor 3A subunit 1 OS=Homo sapiens OX=9606 GN=SF3A1 PE=1 SV=1	Q15459	0.6	0.8	0.75	0.666667	0.7	0.666667	0.86
Myosin light chain kinase, smooth muscle OS=Homo sapiens OX=9606 GN=MYLK PE=1 SV=4	Q15746	0.8	0.7	0.727273	0.777778	0.75	0.761905	0.86
Protein mono-ADP-ribosyltransferase PARP14 OS=Homo sapiens OX=9606 GN=PARP14 PE=1 SV=3	Q460N5	0.7	0.8	0.777778	0.727273	0.75	0.736842	0.86
Transmembrane protein 205 OS=Homo sapiens OX=9606 GN=TMEM205 PE=1 SV=1	Q6UW68	0.7	0.7	0.7	0.7	0.7	0.7	0.86
Olfactomedin-4 OS=Homo sapiens OX=9606 GN=OLFM4 PE=1 SV=1	Q6UX06	0.8	0.7	0.727273	0.777778	0.75	0.761905	0.86
Lipolysis-stimulated lipoprotein receptor OS=Homo sapiens OX=9606 GN=LSR PE=1 SV=4	Q86X29	0.6	0.9	0.857143	0.692308	0.75	0.705882	0.86
Proteasome inhibitor PI31 subunit OS=Homo sapiens OX=9606 GN=PSMF1 PE=1 SV=2	Q92530	0.8	0.6	0.666667	0.75	0.7	0.727273	0.86
Protein Niban OS=Homo sapiens OX=9606 GN=FAM129A PE=1 SV=1	Q9BZQ8	0.9	0.7	0.75	0.875	0.8	0.818182	0.86
Ubiquitin-like modifier-activating enzyme 5 OS=Homo sapiens OX=9606 GN=UBA5 PE=1 SV=1	Q9GZZ9	0.6	0.9	0.857143	0.692308	0.75	0.705882	0.86
Golgi resident protein GCP60 OS=Homo sapiens OX=9606 GN=ACBD3 PE=1 SV=4	Q9H3P7	0.6	0.9	0.857143	0.692308	0.75	0.705882	0.86
Acyl-CoA dehydrogenase family member 9, mitochondrial OS=Homo sapiens OX=9606 GN=ACAD9 PE=1 SV=1	Q9H845	0.7	0.9	0.875	0.75	0.8	0.777778	0.86
Heme-binding protein 1 OS=Homo sapiens OX=9606 GN=HEBP1 PE=1 SV=1	Q9NRV9	0.5	0.7	0.625	0.583333	0.6	0.555556	0.86
Stabilin-1 OS=Homo sapiens OX=9606 GN=STAB1 PE=1 SV=3	Q9NY15	0.2	0.9	0.666667	0.529412	0.55	0.307692	0.86
Deleted in malignant brain tumors 1 protein OS=Homo sapiens OX=9606 GN=DMBT1 PE=1 SV=2	Q9UGM3	0.7	0.7	0.7	0.7	0.7	0.7	0.86
RNA transcription, translation and transport factor protein OS=Homo sapiens OX=9606 GN=RTRAF PE=1 SV=1	Q9Y224	0.7	0.8	0.777778	0.727273	0.75	0.736842	0.86
tRNA-splicing ligase RtcB homolog OS=Homo sapiens OX=9606 GN=RTCB PE=1 SV=1	Q9Y3I0	0.7	0.7	0.7	0.7	0.7	0.7	0.86
Phosphoserine aminotransferase OS=Homo sapiens OX=9606 GN=PSAT1 PE=1 SV=2	Q9Y617	0.8	0.6	0.666667	0.75	0.7	0.727273	0.86
Immunoglobulin heavy constant gamma 4 OS=Homo sapiens OX=9606 GN=IGHG4 PE=1 SV=1	P01861	0.8	0.8	0.8	0.8	0.8	0.8	0.86
Endoplasmin OS=Homo sapiens OX=9606 GN=HSP90B1 PE=1 SV=1	P14625	0.7	0.9	0.875	0.75	0.8	0.777778	0.86
Hippocalcin-like protein 1 OS=Homo sapiens OX=9606 GN=HPCAL1 PE=1 SV=3	P37235	0.7	0.7	0.7	0.7	0.7	0.7	0.86
Casein kinase II subunit alpha OS=Homo sapiens OX=9606 GN=CSNK2A1 PE=1 SV=1	P68400	0.8	0.9	0.888889	0.818182	0.85	0.842105	0.86
SAP domain-containing ribonucleoprotein OS=Homo sapiens OX=9606 GN=SARNP PE=1 SV=3	P82979	0.7	0.7	0.7	0.7	0.7	0.7	0.86
Angio-associated migratory cell protein OS=Homo sapiens OX=9606 GN=AAMP PE=1 SV=2	Q13685	0.9	0.9	0.9	0.9	0.9	0.9	0.855
Glutamate-rich WD repeat-containing protein 1 OS=Homo sapiens OX=9606 GN=GRWD1 PE=1 SV=1	Q9BQ67	0.5	0.9	0.833333	0.642857	0.7	0.625	0.855
RNA 3'-terminal phosphate cyclase OS=Homo sapiens OX=9606 GN=RTCA PE=1 SV=1	O00442	0.7	0.9	0.875	0.75	0.8	0.777778	0.85
Na(+)/H(+) exchange regulatory cofactor NHE-RF1 OS=Homo sapiens OX=9606 GN=SLC9A3R1 PE=1 SV=4	O14745	0.7	0.7	0.7	0.7	0.7	0.7	0.85
Unconventional myosin-Ib OS=Homo sapiens OX=9606 GN=MYO1B PE=1 SV=3	O43795	0.6	0.7	0.666667	0.636364	0.65	0.631579	0.85
Transferrin receptor protein 1 OS=Homo sapiens OX=9606 GN=TFRC PE=1 SV=2	P02786	0.6	0.6	0.6	0.6	0.6	0.6	0.85
Histidine-rich glycoprotein OS=Homo sapiens OX=9606 GN=HRG PE=1 SV=1	P04196	0.7	0.5	0.583333	0.625	0.6	0.636364	0.85
Tubulin beta-4A chain OS=Homo sapiens OX=9606 GN=TUBB4A PE=1 SV=2	P04350	0.5	0.8	0.714286	0.615385	0.65	0.588235	0.85
Immunoglobulin kappa variable 1D-39 OS=Homo sapiens OX=9606 GN=IGKV1D-39 PE=3 SV=2	P04432	0.7	0.6	0.636364	0.666667	0.65	0.666667	0.85
Pancreatic alpha-amylase OS=Homo sapiens OX=9606 GN=AMY2A PE=1 SV=2	P04746	0.8	0.6	0.666667	0.75	0.7	0.727273	0.85
Vitamin K-dependent protein S OS=Homo sapiens OX=9606 GN=PROS1 PE=1 SV=1	P07225	0.7	0.7	0.7	0.7	0.7	0.7	0.85
Complement component C8 alpha chain OS=Homo sapiens OX=9606 GN=C8A PE=1 SV=2	P07357	0.6	0.7	0.666667	0.636364	0.65	0.631579	0.85
Laminin subunit beta-1 OS=Homo sapiens OX=9606 GN=LAMB1 PE=1 SV=2	P07942	0.7	0.7	0.7	0.7	0.7	0.7	0.85
Neutrophil elastase OS=Homo sapiens OX=9606 GN=ELANE PE=1 SV=1	P08246	0.7	0.6	0.636364	0.666667	0.65	0.666667	0.85
Complement factor H OS=Homo sapiens OX=9606 GN=CFH PE=1 SV=4	P08603	0.7	0.8	0.777778	0.727273	0.75	0.736842	0.85
Signal recognition particle 19 kDa protein OS=Homo sapiens OX=9606 GN=SRP19 PE=1 SV=3	P09132	0.8	0.8	0.8	0.8	0.8	0.8	0.85
2',3'-cyclic-nucleotide 3'-phosphodiesterase OS=Homo sapiens OX=9606 GN=CNP PE=1 SV=2	P09543	0.5	0.8	0.714286	0.615385	0.65	0.588235	0.85
HLA class I histocompatibility antigen, A-69 alpha chain OS=Homo sapiens OX=9606 GN=HLA-A PE=1 SV=2	P10316	0.6	0.8	0.75	0.666667	0.7	0.666667	0.85
Plastin-3 OS=Homo sapiens OX=9606 GN=PLS3 PE=1 SV=4	P13797	0.7	0.7	0.7	0.7	0.7	0.7	0.85
Nidogen-1 OS=Homo sapiens OX=9606 GN=NID1 PE=1 SV=3	P14543	0.8	0.5	0.615385	0.714286	0.65	0.695652	0.85
Protein kinase C alpha type OS=Homo sapiens OX=9606 GN=PRKCA PE=1 SV=4	P17252	0.8	0.7	0.727273	0.777778	0.75	0.761905	0.85
Cyclin-dependent kinase 11B OS=Homo sapiens OX=9606 GN=CDK11B PE=1 SV=4	P21127	0.5	0.8	0.714286	0.615385	0.65	0.588235	0.85
Cysteine and glycine-rich protein 1 OS=Homo sapiens OX=9606 GN=CSRP1 PE=1 SV=3	P21291	0.9	0.7	0.75	0.875	0.8	0.818182	0.85
Replication protein A 70 kDa DNA-binding subunit OS=Homo sapiens OX=9606 GN=RPA1 PE=1 SV=2	P27694	0.8	0.6	0.666667	0.75	0.7	0.727273	0.85
Protein PML OS=Homo sapiens OX=9606 GN=PML PE=1 SV=3	P29590	0.8	1	1	0.833333	0.9	0.888889	0.85
Coatomer subunit beta' OS=Homo sapiens OX=9606 GN=COPB2 PE=1 SV=2	P35606	0.6	0.9	0.857143	0.692308	0.75	0.705882	0.85
Basal cell adhesion molecule OS=Homo sapiens OX=9606 GN=BCAM PE=1 SV=2	P50895	0.5	0.8	0.714286	0.615385	0.65	0.588235	0.85
5'-AMP-activated protein kinase subunit gamma-1 OS=Homo sapiens OX=9606 GN=PRKAG1 PE=1 SV=1	P54619	0.6	0.7	0.666667	0.636364	0.65	0.631579	0.85
Actin-related protein 2 OS=Homo sapiens OX=9606 GN=ACTR2 PE=1 SV=1	P61160	0.5	0.7	0.625	0.583333	0.6	0.555556	0.85
Ubiquitin-60S ribosomal protein L40 OS=Homo sapiens OX=9606 GN=UBA52 PE=1 SV=2	P62987	0.8	0.8	0.8	0.8	0.8	0.8	0.85
Actin, cytoplasmic 2 OS=Homo sapiens OX=9606 GN=ACTG1 PE=1 SV=1	P63261	0.5	0.7	0.625	0.583333	0.6	0.555556	0.85
28S ribosomal protein S22, mitochondrial OS=Homo sapiens OX=9606 GN=MRPS22 PE=1 SV=1	P82650	0.4	0.9	0.8	0.6	0.65	0.533333	0.85
Mitochondrial 2-oxoglutarate/malate carrier protein OS=Homo sapiens OX=9606 GN=SLC25A11 PE=1 SV=3	Q02978	0.7	0.7	0.7	0.7	0.7	0.7	0.85
Collagen alpha-1(XIV) chain OS=Homo sapiens OX=9606 GN=COL14A1 PE=1 SV=3	Q05707	0.8	0.5	0.615385	0.714286	0.65	0.695652	0.85
Syntaxin-4 OS=Homo sapiens OX=9606 GN=STX4 PE=1 SV=2	Q12846	0.6	0.8	0.75	0.666667	0.7	0.666667	0.85
Methanethiol oxidase OS=Homo sapiens OX=9606 GN=SELENBP1 PE=1 SV=2	Q13228	0.9	0.7	0.75	0.875	0.8	0.818182	0.85
Sorting nexin-1 OS=Homo sapiens OX=9606 GN=SNX1 PE=1 SV=3	Q13596	0.7	0.7	0.7	0.7	0.7	0.7	0.85
Isopentenyl-diphosphate Delta-isomerase 1 OS=Homo sapiens OX=9606 GN=IDI1 PE=1 SV=2	Q13907	0.4	0.9	0.8	0.6	0.65	0.533333	0.85
Nucleolar and coiled-body phosphoprotein 1 OS=Homo sapiens OX=9606 GN=NOLC1 PE=1 SV=2	Q14978	0.7	0.6	0.636364	0.666667	0.65	0.666667	0.85
Sarcolemmal membrane-associated protein OS=Homo sapiens OX=9606 GN=SLMAP PE=1 SV=1	Q14BN4	0.8	0.7	0.727273	0.777778	0.75	0.761905	0.85
Guanine nucleotide-binding protein G(s) subunit alpha isoforms XLas OS=Homo sapiens OX=9606 GN=GNAS PE=1 SV=2	Q5JWF2	0.7	0.4	0.538462	0.571429	0.55	0.608696	0.85
Ragulator complex protein LAMTOR1 OS=Homo sapiens OX=9606 GN=LAMTOR1 PE=1 SV=2	Q6IAA8	0.6	0.7	0.666667	0.636364	0.65	0.631579	0.85
Phospholipase B-like 1 OS=Homo sapiens OX=9606 GN=PLBD1 PE=1 SV=2	Q6P4A8	0.7	0.9	0.875	0.75	0.8	0.777778	0.85
La-related protein 1 OS=Homo sapiens OX=9606 GN=LARP1 PE=1 SV=2	Q6PKG0	0.6	0.8	0.75	0.666667	0.7	0.666667	0.85
MOB kinase activator 1B OS=Homo sapiens OX=9606 GN=MOB1B PE=1 SV=3	Q7L9L4	0.5	0.8	0.714286	0.615385	0.65	0.588235	0.85
Fermitin family homolog 3 OS=Homo sapiens OX=9606 GN=FERMT3 PE=1 SV=1	Q86UX7	0.6	0.8	0.75	0.666667	0.7	0.666667	0.85
Importin-4 OS=Homo sapiens OX=9606 GN=IPO4 PE=1 SV=2	Q8TEX9	0.6	0.9	0.857143	0.692308	0.75	0.705882	0.85
Protein FAM3C OS=Homo sapiens OX=9606 GN=FAM3C PE=1 SV=1	Q92520	0.5	1	1	0.666667	0.75	0.666667	0.85
Nicalin OS=Homo sapiens OX=9606 GN=NCLN PE=1 SV=2	Q969V3	0.5	0.8	0.714286	0.615385	0.65	0.588235	0.85
Sorbin and SH3 domain-containing protein 1 OS=Homo sapiens OX=9606 GN=SORBS1 PE=1 SV=3	Q9BX66	0.7	0.7	0.7	0.7	0.7	0.7	0.85
N-alpha-acetyltransferase 15, NatA auxiliary subunit OS=Homo sapiens OX=9606 GN=NAA15 PE=1 SV=1	Q9BXJ9	0.7	0.8	0.777778	0.727273	0.75	0.736842	0.85
Muscleblind-like protein 1 OS=Homo sapiens OX=9606 GN=MBNL1 PE=1 SV=2	Q9NR56	0.8	0.8	0.8	0.8	0.8	0.8	0.85
Sister chromatid cohesion protein PDS5 homolog B OS=Homo sapiens OX=9606 GN=PDS5B PE=1 SV=1	Q9NTI5	0.6	0.8	0.75	0.666667	0.7	0.666667	0.85
SPATS2-like protein OS=Homo sapiens OX=9606 GN=SPATS2L PE=1 SV=2	Q9NUQ6	0.7	0.8	0.777778	0.727273	0.75	0.736842	0.85
Protein argonaute-2 OS=Homo sapiens OX=9606 GN=AGO2 PE=1 SV=3	Q9UKV8	0.7	0.8	0.777778	0.727273	0.75	0.736842	0.85
Talin-1 OS=Homo sapiens OX=9606 GN=TLN1 PE=1 SV=3	Q9Y490	0.6	0.6	0.6	0.6	0.6	0.6	0.85
Mannose-1-phosphate guanyltransferase beta OS=Homo sapiens OX=9606 GN=GMPPB PE=1 SV=2	Q9Y5P6	0.7	0.9	0.875	0.75	0.8	0.777778	0.85
1,2-dihydroxy-3-keto-5-methylthiopentene dioxygenase OS=Homo sapiens OX=9606 GN=ADI1 PE=1 SV=1	Q9BV57	0.5	0.9	0.833333	0.642857	0.7	0.625	0.85
EMILIN-1 OS=Homo sapiens OX=9606 GN=EMILIN1 PE=1 SV=3	Q9Y6C2	0.7	0.6	0.636364	0.666667	0.65	0.666667	0.85
Double-strand break repair protein MRE11 OS=Homo sapiens OX=9606 GN=MRE11 PE=1 SV=3	P49959	0	0.6	0	0.375	0.3		0.845
Peptidyl-prolyl cis-trans isomerase FKBP5 OS=Homo sapiens OX=9606 GN=FKBP5 PE=1 SV=2	Q13451	0.3	0.9	0.75	0.5625	0.6	0.428571	0.845
Dynamin-1-like protein OS=Homo sapiens OX=9606 GN=DNM1L PE=1 SV=2	O00429	0.8	0.9	0.888889	0.818182	0.85	0.842105	0.84
Importin subunit alpha-4 OS=Homo sapiens OX=9606 GN=KPNA3 PE=1 SV=2	O00505	0.4	0.8	0.666667	0.571429	0.6	0.5	0.84
Surfeit locus protein 4 OS=Homo sapiens OX=9606 GN=SURF4 PE=1 SV=3	O15260	0.6	0.8	0.75	0.666667	0.7	0.666667	0.84
ATPase ASNA1 OS=Homo sapiens OX=9606 GN=ASNA1 PE=1 SV=2	O43681	0.7	0.6	0.636364	0.666667	0.65	0.666667	0.84
Mitochondrial carnitine/acylcarnitine carrier protein OS=Homo sapiens OX=9606 GN=SLC25A20 PE=1 SV=1	O43772	0.5	0.9	0.833333	0.642857	0.7	0.625	0.84
Histone H2B type 1-K OS=Homo sapiens OX=9606 GN=HIST1H2BK PE=1 SV=3	O60814	0.6	0.8	0.75	0.666667	0.7	0.666667	0.84
Unconventional myosin-Id OS=Homo sapiens OX=9606 GN=MYO1D PE=1 SV=2	O94832	0.6	0.8	0.75	0.666667	0.7	0.666667	0.84
Protein transport protein Sec31A OS=Homo sapiens OX=9606 GN=SEC31A PE=1 SV=3	O94979	0.7	0.8	0.777778	0.727273	0.75	0.736842	0.84
Alcohol dehydrogenase 1C OS=Homo sapiens OX=9606 GN=ADH1C PE=1 SV=2	P00326	0.7	0.7	0.7	0.7	0.7	0.7	0.84
Complement C5 OS=Homo sapiens OX=9606 GN=C5 PE=1 SV=4	P01031	0.6	0.7	0.666667	0.636364	0.65	0.631579	0.84
Apolipoprotein A-I OS=Homo sapiens OX=9606 GN=APOA1 PE=1 SV=1	P02647	0.6	0.6	0.6	0.6	0.6	0.6	0.84
Complement C1q subcomponent subunit C OS=Homo sapiens OX=9606 GN=C1QC PE=1 SV=3	P02747	0.6	0.7	0.666667	0.636364	0.65	0.631579	0.84
Alpha-2-antiplasmin OS=Homo sapiens OX=9606 GN=SERPINF2 PE=1 SV=3	P08697	0.7	0.7	0.7	0.7	0.7	0.7	0.84
3-ketoacyl-CoA thiolase, peroxisomal OS=Homo sapiens OX=9606 GN=ACAA1 PE=1 SV=2	P09110	0.7	0.7	0.7	0.7	0.7	0.7	0.84
Clathrin light chain B OS=Homo sapiens OX=9606 GN=CLTB PE=1 SV=1	P09497	0.5	0.7	0.625	0.583333	0.6	0.555556	0.84
Ras-related protein Ral-B OS=Homo sapiens OX=9606 GN=RALB PE=1 SV=1	P11234	0.6	0.8	0.75	0.666667	0.7	0.666667	0.84
ADP/ATP translocase 3 OS=Homo sapiens OX=9606 GN=SLC25A6 PE=1 SV=4	P12236	0.5	0.9	0.833333	0.642857	0.7	0.625	0.84
Carnitine O-palmitoyltransferase 2, mitochondrial OS=Homo sapiens OX=9606 GN=CPT2 PE=1 SV=2	P23786	0.5	0.9	0.833333	0.642857	0.7	0.625	0.84
DNA-directed RNA polymerase II subunit RPB1 OS=Homo sapiens OX=9606 GN=POLR2A PE=1 SV=2	P24928	0.5	0.8	0.714286	0.615385	0.65	0.588235	0.84
Erythrocyte band 7 integral membrane protein OS=Homo sapiens OX=9606 GN=STOM PE=1 SV=3	P27105	0.7	0.5	0.583333	0.625	0.6	0.636364	0.84
Caspase-1 OS=Homo sapiens OX=9606 GN=CASP1 PE=1 SV=1	P29466	0.6	0.8	0.75	0.666667	0.7	0.666667	0.84
Serine/threonine-protein phosphatase 2A 65 kDa regulatory subunit A alpha isoform OS=Homo sapiens OX=9606 GN=PPP2R1A PE=1 SV=4	P30153	0.7	0.8	0.777778	0.727273	0.75	0.736842	0.84
Deoxycytidylate deaminase OS=Homo sapiens OX=9606 GN=DCTD PE=1 SV=2	P32321	0.6	0.8	0.75	0.666667	0.7	0.666667	0.84
Serine/threonine-protein phosphatase PP1-gamma catalytic subunit OS=Homo sapiens OX=9606 GN=PPP1CC PE=1 SV=1	P36873	0.5	0.8	0.714286	0.615385	0.65	0.588235	0.84
26S proteasome non-ATPase regulatory subunit 4 OS=Homo sapiens OX=9606 GN=PSMD4 PE=1 SV=1	P55036	0.5	0.7	0.625	0.583333	0.6	0.555556	0.84
Bystin OS=Homo sapiens OX=9606 GN=BYSL PE=1 SV=3	Q13895	0.7	0.8	0.777778	0.727273	0.75	0.736842	0.84
Procollagen C-endopeptidase enhancer 1 OS=Homo sapiens OX=9606 GN=PCOLCE PE=1 SV=2	Q15113	0.7	0.7	0.7	0.7	0.7	0.7	0.84
Serine/threonine-protein phosphatase 2A activator OS=Homo sapiens OX=9606 GN=PTPA PE=1 SV=3	Q15257	0.7	0.8	0.777778	0.727273	0.75	0.736842	0.84
Nicotinate-nucleotide pyrophosphorylase [carboxylating] OS=Homo sapiens OX=9606 GN=QPRT PE=1 SV=3	Q15274	0.7	0.8	0.777778	0.727273	0.75	0.736842	0.84
Elongin-C OS=Homo sapiens OX=9606 GN=ELOC PE=1 SV=1	Q15369	0.5	0.8	0.714286	0.615385	0.65	0.588235	0.84
Protein transport protein Sec23B OS=Homo sapiens OX=9606 GN=SEC23B PE=1 SV=2	Q15437	0.7	0.7	0.7	0.7	0.7	0.7	0.84
Prostacyclin synthase OS=Homo sapiens OX=9606 GN=PTGIS PE=1 SV=1	Q16647	0.8	0.8	0.8	0.8	0.8	0.8	0.84
Phospholipase D3 OS=Homo sapiens OX=9606 GN=PLD3 PE=1 SV=1	Q8IV08	0.6	0.8	0.75	0.666667	0.7	0.666667	0.84
Protein THEM6 OS=Homo sapiens OX=9606 GN=THEM6 PE=1 SV=2	Q8WUY1	0.4	0.9	0.8	0.6	0.65	0.533333	0.84
Gamma-glutamyl hydrolase OS=Homo sapiens OX=9606 GN=GGH PE=1 SV=2	Q92820	0.7	0.7	0.7	0.7	0.7	0.7	0.84
Pyrroline-5-carboxylate reductase 2 OS=Homo sapiens OX=9606 GN=PYCR2 PE=1 SV=1	Q96C36	0.6	0.9	0.857143	0.692308	0.75	0.705882	0.84
FAS-associated factor 2 OS=Homo sapiens OX=9606 GN=FAF2 PE=1 SV=2	Q96CS3	0.7	0.8	0.777778	0.727273	0.75	0.736842	0.84
Protein S100-A16 OS=Homo sapiens OX=9606 GN=S100A16 PE=1 SV=1	Q96FQ6	0.7	0.7	0.7	0.7	0.7	0.7	0.84
PRKC apoptosis WT1 regulator protein OS=Homo sapiens OX=9606 GN=PAWR PE=1 SV=1	Q96IZ0	0.6	0.6	0.6	0.6	0.6	0.6	0.84
Transcription factor BTF3 homolog 4 OS=Homo sapiens OX=9606 GN=BTF3L4 PE=1 SV=1	Q96K17	0.4	0.9	0.8	0.6	0.65	0.533333	0.84
Perilipin-4 OS=Homo sapiens OX=9606 GN=PLIN4 PE=1 SV=2	Q96Q06	0.8	0.8	0.8	0.8	0.8	0.8	0.84
Myb-binding protein 1A OS=Homo sapiens OX=9606 GN=MYBBP1A PE=1 SV=2	Q9BQG0	0.5	0.8	0.714286	0.615385	0.65	0.588235	0.84
Polyadenylate-binding protein-interacting protein 1 OS=Homo sapiens OX=9606 GN=PAIP1 PE=1 SV=1	Q9H074	0.7	0.5	0.583333	0.625	0.6	0.636364	0.84
Magnesium transporter protein 1 OS=Homo sapiens OX=9606 GN=MAGT1 PE=1 SV=1	Q9H0U3	0.6	0.8	0.75	0.666667	0.7	0.666667	0.84
DnaJ homolog subfamily C member 5 OS=Homo sapiens OX=9606 GN=DNAJC5 PE=1 SV=1	Q9H3Z4	0.6	0.8	0.75	0.666667	0.7	0.666667	0.84
Epidermal growth factor receptor kinase substrate 8-like protein 2 OS=Homo sapiens OX=9606 GN=EPS8L2 PE=1 SV=2	Q9H6S3	0.7	0.6	0.636364	0.666667	0.65	0.666667	0.84
Protein S100-A14 OS=Homo sapiens OX=9606 GN=S100A14 PE=1 SV=1	Q9HCY8	0.6	0.8	0.75	0.666667	0.7	0.666667	0.84
GTPase IMAP family member 4 OS=Homo sapiens OX=9606 GN=GIMAP4 PE=1 SV=1	Q9NUV9	0.7	0.9	0.875	0.75	0.8	0.777778	0.84
Armadillo repeat-containing X-linked protein 3 OS=Homo sapiens OX=9606 GN=ARMCX3 PE=1 SV=1	Q9UH62	0.8	0.8	0.8	0.8	0.8	0.8	0.84
Protein canopy homolog 2 OS=Homo sapiens OX=9606 GN=CNPY2 PE=1 SV=1	Q9Y2B0	0.6	0.8	0.75	0.666667	0.7	0.666667	0.84
Rho GTPase-activating protein 18 OS=Homo sapiens OX=9606 GN=ARHGAP18 PE=1 SV=3	Q8N392	0.7	0.8	0.777778	0.727273	0.75	0.736842	0.84
Endoplasmic reticulum aminopeptidase 2 OS=Homo sapiens OX=9606 GN=ERAP2 PE=1 SV=2	Q6P179	0.2	0.8	0.5	0.5	0.5	0.285714	0.835
Monofunctional C1-tetrahydrofolate synthase, mitochondrial OS=Homo sapiens OX=9606 GN=MTHFD1L PE=1 SV=1	Q6UB35	0.9	0.7	0.75	0.875	0.8	0.818182	0.835
Choline dehydrogenase, mitochondrial OS=Homo sapiens OX=9606 GN=CHDH PE=1 SV=2	Q8NE62	0	0.7	0	0.411765	0.35		0.835
Tubulin alpha chain-like 3 OS=Homo sapiens OX=9606 GN=TUBAL3 PE=1 SV=2	A6NHL2	0.6	0.7	0.666667	0.636364	0.65	0.631579	0.83
Bifunctional 3'-phosphoadenosine 5'-phosphosulfate synthase 1 OS=Homo sapiens OX=9606 GN=PAPSS1 PE=1 SV=2	O43252	0.5	0.9	0.833333	0.642857	0.7	0.625	0.83
Tumor protein D54 OS=Homo sapiens OX=9606 GN=TPD52L2 PE=1 SV=2	O43399	0.7	0.6	0.636364	0.666667	0.65	0.666667	0.83
Putative nucleoside diphosphate kinase OS=Homo sapiens OX=9606 GN=NME2P1 PE=5 SV=1	O60361	0.6	0.7	0.666667	0.636364	0.65	0.631579	0.83
Splicing factor 3B subunit 1 OS=Homo sapiens OX=9606 GN=SF3B1 PE=1 SV=3	O75533	0.6	0.7	0.666667	0.636364	0.65	0.631579	0.83
Cytochrome b5 OS=Homo sapiens OX=9606 GN=CYB5A PE=1 SV=2	P00167	0.7	0.7	0.7	0.7	0.7	0.7	0.83
HLA class II histocompatibility antigen, DR alpha chain OS=Homo sapiens OX=9606 GN=HLA-DRA PE=1 SV=1	P01903	0.4	0.8	0.666667	0.571429	0.6	0.5	0.83
Vitamin D-binding protein OS=Homo sapiens OX=9606 GN=GC PE=1 SV=2	P02774	0.6	0.6	0.6	0.6	0.6	0.6	0.83
Rho-related GTP-binding protein RhoC OS=Homo sapiens OX=9606 GN=RHOC PE=1 SV=1	P08134	0.3	0.9	0.75	0.5625	0.6	0.428571	0.83
Extracellular superoxide dismutase [Cu-Zn] OS=Homo sapiens OX=9606 GN=SOD3 PE=1 SV=2	P08294	0.7	0.8	0.777778	0.727273	0.75	0.736842	0.83
Immunoglobulin kappa light chain OS=Homo sapiens OX=9606 PE=1 SV=1	P0DOX7	0.6	0.6	0.6	0.6	0.6	0.6	0.83
Carcinoembryonic antigen-related cell adhesion molecule 1 OS=Homo sapiens OX=9606 GN=CEACAM1 PE=1 SV=2	P13688	0.5	0.9	0.833333	0.642857	0.7	0.625	0.83
Syndecan-1 OS=Homo sapiens OX=9606 GN=SDC1 PE=1 SV=3	P18827	0.6	0.9	0.857143	0.692308	0.75	0.705882	0.83
Annexin A7 OS=Homo sapiens OX=9606 GN=ANXA7 PE=1 SV=3	P20073	0.6	0.7	0.666667	0.636364	0.65	0.631579	0.83
Ras-related protein Rab-5A OS=Homo sapiens OX=9606 GN=RAB5A PE=1 SV=2	P20339	0.6	0.9	0.857143	0.692308	0.75	0.705882	0.83
Mitogen-activated protein kinase 3 OS=Homo sapiens OX=9606 GN=MAPK3 PE=1 SV=4	P27361	0.3	0.8	0.6	0.533333	0.55	0.4	0.83
Myosin-9 OS=Homo sapiens OX=9606 GN=MYH9 PE=1 SV=4	P35579	0.7	0.8	0.777778	0.727273	0.75	0.736842	0.83
Lys-63-specific deubiquitinase BRCC36 OS=Homo sapiens OX=9606 GN=BRCC3 PE=1 SV=2	P46736	0.5	0.7	0.625	0.583333	0.6	0.555556	0.83
Methionine aminopeptidase 1 OS=Homo sapiens OX=9606 GN=METAP1 PE=1 SV=2	P53582	0.5	0.8	0.714286	0.615385	0.65	0.588235	0.83
Voltage-dependent calcium channel subunit alpha-2/delta-1 OS=Homo sapiens OX=9606 GN=CACNA2D1 PE=1 SV=3	P54289	0.7	0.5	0.583333	0.625	0.6	0.636364	0.83
Actin-related protein 3 OS=Homo sapiens OX=9606 GN=ACTR3 PE=1 SV=3	P61158	0.6	0.6	0.6	0.6	0.6	0.6	0.83
60S ribosomal protein L23a OS=Homo sapiens OX=9606 GN=RPL23A PE=1 SV=1	P62750	0.7	0.9	0.875	0.75	0.8	0.777778	0.83
Actin, alpha skeletal muscle OS=Homo sapiens OX=9606 GN=ACTA1 PE=1 SV=1	P68133	0.7	0.5	0.583333	0.625	0.6	0.636364	0.83
Histone H3.1 OS=Homo sapiens OX=9606 GN=HIST1H3A PE=1 SV=2	P68431	0.6	0.6	0.6	0.6	0.6	0.6	0.83
1-phosphatidylinositol 4,5-bisphosphate phosphodiesterase beta-3 OS=Homo sapiens OX=9606 GN=PLCB3 PE=1 SV=2	Q01970	0.4	0.9	0.8	0.6	0.65	0.533333	0.83
Transgelin OS=Homo sapiens OX=9606 GN=TAGLN PE=1 SV=4	Q01995	0.8	0.7	0.727273	0.777778	0.75	0.761905	0.83
Synaptic functional regulator FMR1 OS=Homo sapiens OX=9606 GN=FMR1 PE=1 SV=1	Q06787	0.5	0.9	0.833333	0.642857	0.7	0.625	0.83
Galectin-3-binding protein OS=Homo sapiens OX=9606 GN=LGALS3BP PE=1 SV=1	Q08380	0.7	0.6	0.636364	0.666667	0.65	0.666667	0.83
COP9 signalosome complex subunit 1 OS=Homo sapiens OX=9606 GN=GPS1 PE=1 SV=4	Q13098	0.7	0.5	0.583333	0.625	0.6	0.636364	0.83
Signal peptidase complex subunit 2 OS=Homo sapiens OX=9606 GN=SPCS2 PE=1 SV=3	Q15005	0.7	0.8	0.777778	0.727273	0.75	0.736842	0.83
Plectin OS=Homo sapiens OX=9606 GN=PLEC PE=1 SV=3	Q15149	0.7	0.7	0.7	0.7	0.7	0.7	0.83
Splicing factor 1 OS=Homo sapiens OX=9606 GN=SF1 PE=1 SV=4	Q15637	0.7	0.9	0.875	0.75	0.8	0.777778	0.83
ELAV-like protein 1 OS=Homo sapiens OX=9606 GN=ELAVL1 PE=1 SV=2	Q15717	0.7	0.5	0.583333	0.625	0.6	0.636364	0.83
Thioredoxin reductase 1, cytoplasmic OS=Homo sapiens OX=9606 GN=TXNRD1 PE=1 SV=3	Q16881	0.5	0.9	0.833333	0.642857	0.7	0.625	0.83
U4/U6.U5 tri-snRNP-associated protein 2 OS=Homo sapiens OX=9606 GN=USP39 PE=1 SV=2	Q53GS9	0.6	0.6	0.6	0.6	0.6	0.6	0.83
Histone H3.2 OS=Homo sapiens OX=9606 GN=HIST2H3A PE=1 SV=3	Q71DI3	0.5	0.9	0.833333	0.642857	0.7	0.625	0.83
Kinectin OS=Homo sapiens OX=9606 GN=KTN1 PE=1 SV=1	Q86UP2	0.6	0.7	0.666667	0.636364	0.65	0.631579	0.83
THO complex subunit 4 OS=Homo sapiens OX=9606 GN=ALYREF PE=1 SV=3	Q86V81	0.7	0.8	0.777778	0.727273	0.75	0.736842	0.83
Carbonyl reductase family member 4 OS=Homo sapiens OX=9606 GN=CBR4 PE=1 SV=3	Q8N4T8	0.6	1	1	0.714286	0.8	0.75	0.83
Actin-related protein 2/3 complex subunit 1A OS=Homo sapiens OX=9606 GN=ARPC1A PE=2 SV=2	Q92747	0.7	0.6	0.636364	0.666667	0.65	0.666667	0.83
DDRGK domain-containing protein 1 OS=Homo sapiens OX=9606 GN=DDRGK1 PE=1 SV=2	Q96HY6	0.7	0.7	0.7	0.7	0.7	0.7	0.83
Protein PRRC1 OS=Homo sapiens OX=9606 GN=PRRC1 PE=1 SV=1	Q96M27	0.5	0.9	0.833333	0.642857	0.7	0.625	0.83
Tumor susceptibility gene 101 protein OS=Homo sapiens OX=9606 GN=TSG101 PE=1 SV=2	Q99816	0.7	0.7	0.7	0.7	0.7	0.7	0.83
Nuclear pore complex protein Nup85 OS=Homo sapiens OX=9606 GN=NUP85 PE=1 SV=1	Q9BW27	0.4	0.9	0.8	0.6	0.65	0.533333	0.83
Tubulin polymerization-promoting protein family member 3 OS=Homo sapiens OX=9606 GN=TPPP3 PE=1 SV=1	Q9BW30	0.8	0.7	0.727273	0.777778	0.75	0.761905	0.83
Protein FAM49B OS=Homo sapiens OX=9606 GN=FAM49B PE=1 SV=1	Q9NUQ9	0.7	0.8	0.777778	0.727273	0.75	0.736842	0.83
Translocation protein SEC63 homolog OS=Homo sapiens OX=9606 GN=SEC63 PE=1 SV=2	Q9UGP8	0.4	0.7	0.571429	0.538462	0.55	0.470588	0.83
LIM domain and actin-binding protein 1 OS=Homo sapiens OX=9606 GN=LIMA1 PE=1 SV=1	Q9UHB6	0.8	0.6	0.666667	0.75	0.7	0.727273	0.83
DCC-interacting protein 13-alpha OS=Homo sapiens OX=9606 GN=APPL1 PE=1 SV=1	Q9UKG1	0.4	0.9	0.8	0.6	0.65	0.533333	0.83
Band 4.1-like protein 3 OS=Homo sapiens OX=9606 GN=EPB41L3 PE=1 SV=2	Q9Y2J2	0.7	0.6	0.636364	0.666667	0.65	0.666667	0.83
CD2-associated protein OS=Homo sapiens OX=9606 GN=CD2AP PE=1 SV=1	Q9Y5K6	0.5	0.9	0.833333	0.642857	0.7	0.625	0.83
Tyrosine-protein kinase Yes OS=Homo sapiens OX=9606 GN=YES1 PE=1 SV=3	P07947	0.5	0.9	0.833333	0.642857	0.7	0.625	0.825
Serine hydroxymethyltransferase, cytosolic OS=Homo sapiens OX=9606 GN=SHMT1 PE=1 SV=1	P34896	0.9	0.7	0.75	0.875	0.8	0.818182	0.825
Complexin-2 OS=Homo sapiens OX=9606 GN=CPLX2 PE=2 SV=2	Q6PUV4	0.9	0.7	0.75	0.875	0.8	0.818182	0.825
WD repeat-containing protein 3 OS=Homo sapiens OX=9606 GN=WDR3 PE=1 SV=1	Q9UNX4	0.9	0.7	0.75	0.875	0.8	0.818182	0.825
Syntaxin-binding protein 3 OS=Homo sapiens OX=9606 GN=STXBP3 PE=1 SV=2	O00186	0.6	0.9	0.857143	0.692308	0.75	0.705882	0.82
CD5 antigen-like OS=Homo sapiens OX=9606 GN=CD5L PE=1 SV=1	O43866	0.8	0.7	0.727273	0.777778	0.75	0.761905	0.82
Protein phosphatase 1 regulatory subunit 12B OS=Homo sapiens OX=9606 GN=PPP1R12B PE=1 SV=2	O60237	0.9	0.6	0.692308	0.857143	0.75	0.782609	0.82
Metaxin-2 OS=Homo sapiens OX=9606 GN=MTX2 PE=1 SV=1	O75431	0.5	0.9	0.833333	0.642857	0.7	0.625	0.82
Bifunctional 3'-phosphoadenosine 5'-phosphosulfate synthase 2 OS=Homo sapiens OX=9606 GN=PAPSS2 PE=1 SV=2	O95340	0.6	0.7	0.666667	0.636364	0.65	0.631579	0.82
GTPase KRas OS=Homo sapiens OX=9606 GN=KRAS PE=1 SV=1	P01116	0.6	0.9	0.857143	0.692308	0.75	0.705882	0.82
Complement factor I OS=Homo sapiens OX=9606 GN=CFI PE=1 SV=2	P05156	0.7	0.6	0.636364	0.666667	0.65	0.666667	0.82
Heparin cofactor 2 OS=Homo sapiens OX=9606 GN=SERPIND1 PE=1 SV=3	P05546	0.4	0.6	0.5	0.5	0.5	0.444444	0.82
72 kDa type IV collagenase OS=Homo sapiens OX=9606 GN=MMP2 PE=1 SV=2	P08253	0	0	0	0	0		0.82
Fructose-bisphosphate aldolase C OS=Homo sapiens OX=9606 GN=ALDOC PE=1 SV=2	P09972	0.8	0.6	0.666667	0.75	0.7	0.727273	0.82
Solute carrier family 2, facilitated glucose transporter member 1 OS=Homo sapiens OX=9606 GN=SLC2A1 PE=1 SV=2	P11166	0.8	0.6	0.666667	0.75	0.7	0.727273	0.82
Spectrin beta chain, erythrocytic OS=Homo sapiens OX=9606 GN=SPTB PE=1 SV=5	P11277	0.9	0.7	0.75	0.875	0.8	0.818182	0.82
Versican core protein OS=Homo sapiens OX=9606 GN=VCAN PE=1 SV=3	P13611	0.7	0.6	0.636364	0.666667	0.65	0.666667	0.82
Beta-galactosidase OS=Homo sapiens OX=9606 GN=GLB1 PE=1 SV=2	P16278	0.5	0.7	0.625	0.583333	0.6	0.555556	0.82
Nucleolar transcription factor 1 OS=Homo sapiens OX=9606 GN=UBTF PE=1 SV=1	P17480	0.4	0.8	0.666667	0.571429	0.6	0.5	0.82
Transcription factor BTF3 OS=Homo sapiens OX=9606 GN=BTF3 PE=1 SV=1	P20290	0.6	0.8	0.75	0.666667	0.7	0.666667	0.82
Ribonucleoside-diphosphate reductase large subunit OS=Homo sapiens OX=9606 GN=RRM1 PE=1 SV=1	P23921	0.8	0.8	0.8	0.8	0.8	0.8	0.82
Zinc-alpha-2-glycoprotein OS=Homo sapiens OX=9606 GN=AZGP1 PE=1 SV=2	P25311	0.6	0.7	0.666667	0.636364	0.65	0.631579	0.82
Calreticulin OS=Homo sapiens OX=9606 GN=CALR PE=1 SV=1	P27797	0.6	0.8	0.75	0.666667	0.7	0.666667	0.82
Proteasome subunit beta type-9 OS=Homo sapiens OX=9606 GN=PSMB9 PE=1 SV=2	P28065	0.7	0.7	0.7	0.7	0.7	0.7	0.82
Pigment epithelium-derived factor OS=Homo sapiens OX=9606 GN=SERPINF1 PE=1 SV=4	P36955	0.6	0.8	0.75	0.666667	0.7	0.666667	0.82
F-actin-capping protein subunit beta OS=Homo sapiens OX=9606 GN=CAPZB PE=1 SV=4	P47756	0.5	0.5	0.5	0.5	0.5	0.5	0.82
Lipopolysaccharide-responsive and beige-like anchor protein OS=Homo sapiens OX=9606 GN=LRBA PE=1 SV=4	P50851	0.7	0.5	0.583333	0.625	0.6	0.636364	0.82
UV excision repair protein RAD23 homolog B OS=Homo sapiens OX=9606 GN=RAD23B PE=1 SV=1	P54727	0.4	0.7	0.571429	0.538462	0.55	0.470588	0.82
Hydroxymethylglutaryl-CoA synthase, mitochondrial OS=Homo sapiens OX=9606 GN=HMGCS2 PE=1 SV=1	P54868	0.7	0.6	0.636364	0.666667	0.65	0.666667	0.82
Protein transport protein Sec61 subunit beta OS=Homo sapiens OX=9606 GN=SEC61B PE=1 SV=2	P60468	0.5	0.9	0.833333	0.642857	0.7	0.625	0.82
NEDD8-conjugating enzyme Ubc12 OS=Homo sapiens OX=9606 GN=UBE2M PE=1 SV=1	P61081	0.4	0.7	0.571429	0.538462	0.55	0.470588	0.82
COP9 signalosome complex subunit 2 OS=Homo sapiens OX=9606 GN=COPS2 PE=1 SV=1	P61201	0.6	0.8	0.75	0.666667	0.7	0.666667	0.82
Beta-2-microglobulin OS=Homo sapiens OX=9606 GN=B2M PE=1 SV=1	P61769	0.7	0.8	0.777778	0.727273	0.75	0.736842	0.82
Actin, gamma-enteric smooth muscle OS=Homo sapiens OX=9606 GN=ACTG2 PE=1 SV=1	P63267	0.8	0.7	0.727273	0.777778	0.75	0.761905	0.82
Fibulin-2 OS=Homo sapiens OX=9606 GN=FBLN2 PE=1 SV=2	P98095	0.5	0.8	0.714286	0.615385	0.65	0.588235	0.82
Aminoacyl tRNA synthase complex-interacting multifunctional protein 1 OS=Homo sapiens OX=9606 GN=AIMP1 PE=1 SV=2	Q12904	0.6	0.7	0.666667	0.636364	0.65	0.631579	0.82
Protein flightless-1 homolog OS=Homo sapiens OX=9606 GN=FLII PE=1 SV=2	Q13045	0.6	0.7	0.666667	0.636364	0.65	0.631579	0.82
ARF GTPase-activating protein GIT2 OS=Homo sapiens OX=9606 GN=GIT2 PE=1 SV=2	Q14161	0.4	0.9	0.8	0.6	0.65	0.533333	0.82
Caveolae-associated protein 1 OS=Homo sapiens OX=9606 GN=CAVIN1 PE=1 SV=1	Q6NZI2	0.7	0.6	0.636364	0.666667	0.65	0.666667	0.82
Pyridoxal-dependent decarboxylase domain-containing protein 1 OS=Homo sapiens OX=9606 GN=PDXDC1 PE=1 SV=2	Q6P996	0.8	0.6	0.666667	0.75	0.7	0.727273	0.82
Chondroitin sulfate proteoglycan 4 OS=Homo sapiens OX=9606 GN=CSPG4 PE=1 SV=2	Q6UVK1	0.9	0.4	0.6	0.8	0.65	0.72	0.82
Protein LYRIC OS=Homo sapiens OX=9606 GN=MTDH PE=1 SV=2	Q86UE4	0.6	0.7	0.666667	0.636364	0.65	0.631579	0.82
NADH dehydrogenase [ubiquinone] 1 alpha subcomplex subunit 11 OS=Homo sapiens OX=9606 GN=NDUFA11 PE=1 SV=3	Q86Y39	0.4	0.8	0.666667	0.571429	0.6	0.5	0.82
Sec1 family domain-containing protein 1 OS=Homo sapiens OX=9606 GN=SCFD1 PE=1 SV=4	Q8WVM8	0.6	0.9	0.857143	0.692308	0.75	0.705882	0.82
Secernin-2 OS=Homo sapiens OX=9606 GN=SCRN2 PE=1 SV=3	Q96FV2	0.8	0.8	0.8	0.8	0.8	0.8	0.82
Fermitin family homolog 1 OS=Homo sapiens OX=9606 GN=FERMT1 PE=1 SV=1	Q9BQL6	0.7	0.7	0.7	0.7	0.7	0.7	0.82
WD repeat-containing protein 61 OS=Homo sapiens OX=9606 GN=WDR61 PE=1 SV=1	Q9GZS3	0.2	0.8	0.5	0.5	0.5	0.285714	0.82
Toll-interacting protein OS=Homo sapiens OX=9606 GN=TOLLIP PE=1 SV=1	Q9H0E2	0.7	0.6	0.636364	0.666667	0.65	0.666667	0.82
Septin-11 OS=Homo sapiens OX=9606 GN=SEPT11 PE=1 SV=3	Q9NVA2	0.6	0.7	0.666667	0.636364	0.65	0.631579	0.82
NADH dehydrogenase [ubiquinone] 1 alpha subcomplex subunit 13 OS=Homo sapiens OX=9606 GN=NDUFA13 PE=1 SV=3	Q9P0J0	0.6	0.6	0.6	0.6	0.6	0.6	0.82
AP-1 complex subunit mu-2 OS=Homo sapiens OX=9606 GN=AP1M2 PE=1 SV=4	Q9Y6Q5	0.4	0.9	0.8	0.6	0.65	0.533333	0.82
Wiskott-Aldrich syndrome protein family member 2 OS=Homo sapiens OX=9606 GN=WASF2 PE=1 SV=3	Q9Y6W5	0.7	0.6	0.636364	0.666667	0.65	0.666667	0.82
Histone deacetylase complex subunit SAP18 OS=Homo sapiens OX=9606 GN=SAP18 PE=1 SV=1	O00422	0.5	0.9	0.833333	0.642857	0.7	0.625	0.815
Tetraspanin-6 OS=Homo sapiens OX=9606 GN=TSPAN6 PE=1 SV=1	O43657	0.9	0.7	0.75	0.875	0.8	0.818182	0.815
SUN domain-containing protein 1 OS=Homo sapiens OX=9606 GN=SUN1 PE=1 SV=3	O94901	0.3	0.9	0.75	0.5625	0.6	0.428571	0.815
Catenin alpha-2 OS=Homo sapiens OX=9606 GN=CTNNA2 PE=1 SV=5	P26232	0.9	0.7	0.75	0.875	0.8	0.818182	0.815
COP9 signalosome complex subunit 7b OS=Homo sapiens OX=9606 GN=COPS7B PE=1 SV=1	Q9H9Q2	0.9	0.7	0.75	0.875	0.8	0.818182	0.815
Programmed cell death protein 5 OS=Homo sapiens OX=9606 GN=PDCD5 PE=1 SV=3	O14737	0.6	0.6	0.6	0.6	0.6	0.6	0.81
Tripeptidyl-peptidase 1 OS=Homo sapiens OX=9606 GN=TPP1 PE=1 SV=2	O14773	0.7	0.8	0.777778	0.727273	0.75	0.736842	0.81
U2 snRNP-associated SURP motif-containing protein OS=Homo sapiens OX=9606 GN=U2SURP PE=1 SV=2	O15042	0.5	0.8	0.714286	0.615385	0.65	0.588235	0.81
Sorbin and SH3 domain-containing protein 2 OS=Homo sapiens OX=9606 GN=SORBS2 PE=1 SV=3	O94875	0.7	0.6	0.636364	0.666667	0.65	0.666667	0.81
Complement factor D OS=Homo sapiens OX=9606 GN=CFD PE=1 SV=5	P00746	0.9	0.4	0.6	0.8	0.65	0.72	0.81
Complement C3 OS=Homo sapiens OX=9606 GN=C3 PE=1 SV=2	P01024	0.6	0.4	0.5	0.5	0.5	0.545455	0.81
Immunoglobulin heavy constant gamma 2 OS=Homo sapiens OX=9606 GN=IGHG2 PE=1 SV=2	P01859	0.7	0.6	0.636364	0.666667	0.65	0.666667	0.81
C-reactive protein OS=Homo sapiens OX=9606 GN=CRP PE=1 SV=1	P02741	0.4	0.8	0.666667	0.571429	0.6	0.5	0.81
Serotransferrin OS=Homo sapiens OX=9606 GN=TF PE=1 SV=3	P02787	0.6	0.5	0.545455	0.555556	0.55	0.571429	0.81
Glucose-6-phosphate isomerase OS=Homo sapiens OX=9606 GN=GPI PE=1 SV=4	P06744	0.6	0.7	0.666667	0.636364	0.65	0.631579	0.81
N(4)-(beta-N-acetylglucosaminyl)-L-asparaginase OS=Homo sapiens OX=9606 GN=AGA PE=1 SV=2	P20933	0.5	1	1	0.666667	0.75	0.666667	0.81
Biglycan OS=Homo sapiens OX=9606 GN=BGN PE=1 SV=2	P21810	0.7	0.7	0.7	0.7	0.7	0.7	0.81
Myosin regulatory light polypeptide 9 OS=Homo sapiens OX=9606 GN=MYL9 PE=1 SV=4	P24844	0.7	0.7	0.7	0.7	0.7	0.7	0.81
High mobility group protein B2 OS=Homo sapiens OX=9606 GN=HMGB2 PE=1 SV=2	P26583	0.7	0.5	0.583333	0.625	0.6	0.636364	0.81
Ribonucleoside-diphosphate reductase subunit M2 OS=Homo sapiens OX=9606 GN=RRM2 PE=1 SV=1	P31350	0.3	0.8	0.6	0.533333	0.55	0.4	0.81
Serpin B6 OS=Homo sapiens OX=9606 GN=SERPINB6 PE=1 SV=3	P35237	0.4	0.8	0.666667	0.571429	0.6	0.5	0.81
Myosin-11 OS=Homo sapiens OX=9606 GN=MYH11 PE=1 SV=3	P35749	0.7	0.7	0.7	0.7	0.7	0.7	0.81
V-type proton ATPase catalytic subunit A OS=Homo sapiens OX=9606 GN=ATP6V1A PE=1 SV=2	P38606	0.6	0.6	0.6	0.6	0.6	0.6	0.81
DNA mismatch repair protein Msh2 OS=Homo sapiens OX=9606 GN=MSH2 PE=1 SV=1	P43246	0.5	0.8	0.714286	0.615385	0.65	0.588235	0.81
Thiopurine S-methyltransferase OS=Homo sapiens OX=9606 GN=TPMT PE=1 SV=1	P51580	0.6	0.7	0.666667	0.636364	0.65	0.631579	0.81
Gamma-aminobutyric acid receptor-associated protein-like 2 OS=Homo sapiens OX=9606 GN=GABARAPL2 PE=1 SV=1	P60520	0.6	0.6	0.6	0.6	0.6	0.6	0.81
Ribose-phosphate pyrophosphokinase 1 OS=Homo sapiens OX=9606 GN=PRPS1 PE=1 SV=2	P60891	0.6	0.6	0.6	0.6	0.6	0.6	0.81
Serine/threonine-protein phosphatase PP1-alpha catalytic subunit OS=Homo sapiens OX=9606 GN=PPP1CA PE=1 SV=1	P62136	0.5	0.4	0.454545	0.444444	0.45	0.47619	0.81
Ubiquitin-40S ribosomal protein S27a OS=Homo sapiens OX=9606 GN=RPS27A PE=1 SV=2	P62979	0.6	0.7	0.666667	0.636364	0.65	0.631579	0.81
Glutathione S-transferase omega-1 OS=Homo sapiens OX=9606 GN=GSTO1 PE=1 SV=2	P78417	0.6	0.8	0.75	0.666667	0.7	0.666667	0.81
ADP-ribosylation factor 5 OS=Homo sapiens OX=9606 GN=ARF5 PE=1 SV=2	P84085	0.5	0.8	0.714286	0.615385	0.65	0.588235	0.81
Inter-alpha-trypsin inhibitor heavy chain H3 OS=Homo sapiens OX=9606 GN=ITIH3 PE=1 SV=2	Q06033	0.7	0.6	0.636364	0.666667	0.65	0.666667	0.81
Nuclear inhibitor of protein phosphatase 1 OS=Homo sapiens OX=9606 GN=PPP1R8 PE=1 SV=2	Q12972	0.4	0.9	0.8	0.6	0.65	0.533333	0.81
Rho-associated protein kinase 1 OS=Homo sapiens OX=9606 GN=ROCK1 PE=1 SV=1	Q13464	0.2	0.9	0.666667	0.529412	0.55	0.307692	0.81
Four and a half LIM domains protein 1 OS=Homo sapiens OX=9606 GN=FHL1 PE=1 SV=4	Q13642	0.7	0.6	0.636364	0.666667	0.65	0.666667	0.81
Syntaxin-binding protein 2 OS=Homo sapiens OX=9606 GN=STXBP2 PE=1 SV=2	Q15833	0.5	0.9	0.833333	0.642857	0.7	0.625	0.81
2-methoxy-6-polyprenyl-1,4-benzoquinol methylase, mitochondrial OS=Homo sapiens OX=9606 GN=COQ5 PE=1 SV=2	Q5HYK3	0.5	0.9	0.833333	0.642857	0.7	0.625	0.81
E3 ubiquitin-protein ligase UBR4 OS=Homo sapiens OX=9606 GN=UBR4 PE=1 SV=1	Q5T4S7	0.2	0.9	0.666667	0.529412	0.55	0.307692	0.81
Proteasome adapter and scaffold protein ECM29 OS=Homo sapiens OX=9606 GN=ECPAS PE=1 SV=2	Q5VYK3	0.7	0.9	0.875	0.75	0.8	0.777778	0.81
3-hydroxyisobutyryl-CoA hydrolase, mitochondrial OS=Homo sapiens OX=9606 GN=HIBCH PE=1 SV=2	Q6NVY1	0.6	0.9	0.857143	0.692308	0.75	0.705882	0.81
CDGSH iron-sulfur domain-containing protein 2 OS=Homo sapiens OX=9606 GN=CISD2 PE=1 SV=1	Q8N5K1	0.7	0.8	0.777778	0.727273	0.75	0.736842	0.81
Inactive C-alpha-formylglycine-generating enzyme 2 OS=Homo sapiens OX=9606 GN=SUMF2 PE=1 SV=2	Q8NBJ7	0.5	0.8	0.714286	0.615385	0.65	0.588235	0.81
Retinol dehydrogenase 13 OS=Homo sapiens OX=9606 GN=RDH13 PE=1 SV=2	Q8NBN7	0.6	0.8	0.75	0.666667	0.7	0.666667	0.81
Retinol dehydrogenase 11 OS=Homo sapiens OX=9606 GN=RDH11 PE=1 SV=2	Q8TC12	0.5	0.9	0.833333	0.642857	0.7	0.625	0.81
Epidermal growth factor receptor kinase substrate 8-like protein 3 OS=Homo sapiens OX=9606 GN=EPS8L3 PE=1 SV=2	Q8TE67	0.6	0.7	0.666667	0.636364	0.65	0.631579	0.81
U4/U6 small nuclear ribonucleoprotein Prp31 OS=Homo sapiens OX=9606 GN=PRPF31 PE=1 SV=2	Q8WWY3	0.5	0.9	0.833333	0.642857	0.7	0.625	0.81
Fermitin family homolog 2 OS=Homo sapiens OX=9606 GN=FERMT2 PE=1 SV=1	Q96AC1	0.7	0.7	0.7	0.7	0.7	0.7	0.81
Optineurin OS=Homo sapiens OX=9606 GN=OPTN PE=1 SV=3	Q96CV9	0.3	0.9	0.75	0.5625	0.6	0.428571	0.81
CDK5 regulatory subunit-associated protein 3 OS=Homo sapiens OX=9606 GN=CDK5RAP3 PE=1 SV=2	Q96JB5	0.7	0.7	0.7	0.7	0.7	0.7	0.81
Chitinase domain-containing protein 1 OS=Homo sapiens OX=9606 GN=CHID1 PE=1 SV=1	Q9BWS9	0.6	0.8	0.75	0.666667	0.7	0.666667	0.81
EH domain-containing protein 2 OS=Homo sapiens OX=9606 GN=EHD2 PE=1 SV=2	Q9NZN4	0.7	0.6	0.636364	0.666667	0.65	0.666667	0.81
Protein NDRG3 OS=Homo sapiens OX=9606 GN=NDRG3 PE=1 SV=2	Q9UGV2	0.2	0.8	0.5	0.5	0.5	0.285714	0.81
Endophilin-B1 OS=Homo sapiens OX=9606 GN=SH3GLB1 PE=1 SV=1	Q9Y371	0.6	0.7	0.666667	0.636364	0.65	0.631579	0.81
Ubiquitin-like modifier-activating enzyme 6 OS=Homo sapiens OX=9606 GN=UBA6 PE=1 SV=1	A0AVT1	0.7	0.5	0.583333	0.625	0.6	0.636364	0.81
60S ribosomal protein L35 OS=Homo sapiens OX=9606 GN=RPL35 PE=1 SV=2	P42766	0.6	0.7	0.666667	0.636364	0.65	0.631579	0.81
ATP-dependent DNA helicase Q1 OS=Homo sapiens OX=9606 GN=RECQL PE=1 SV=3	P46063	0.7	0.8	0.777778	0.727273	0.75	0.736842	0.81
Kinesin light chain 1 OS=Homo sapiens OX=9606 GN=KLC1 PE=1 SV=2	Q07866	0.4	0.9	0.8	0.6	0.65	0.533333	0.81
Integrin-linked protein kinase OS=Homo sapiens OX=9606 GN=ILK PE=1 SV=2	Q13418	0.7	0.6	0.636364	0.666667	0.65	0.666667	0.81
Rho guanine nucleotide exchange factor 1 OS=Homo sapiens OX=9606 GN=ARHGEF1 PE=1 SV=2	Q92888	0.6	0.9	0.857143	0.692308	0.75	0.705882	0.81
Probable ATP-dependent RNA helicase DDX27 OS=Homo sapiens OX=9606 GN=DDX27 PE=1 SV=2	Q96GQ7	0.6	0.9	0.857143	0.692308	0.75	0.705882	0.81
ADP-dependent glucokinase OS=Homo sapiens OX=9606 GN=ADPGK PE=1 SV=1	Q9BRR6	0.6	0.9	0.857143	0.692308	0.75	0.705882	0.81
Heat shock protein beta-8 OS=Homo sapiens OX=9606 GN=HSPB8 PE=1 SV=1	Q9UJY1	0.7	0.6	0.636364	0.666667	0.65	0.666667	0.81
Histone acetyltransferase type B catalytic subunit OS=Homo sapiens OX=9606 GN=HAT1 PE=1 SV=1	O14929	0.9	0.7	0.75	0.875	0.8	0.818182	0.805
Unconventional myosin-If OS=Homo sapiens OX=9606 GN=MYO1F PE=1 SV=3	O00160	0.6	0.8	0.75	0.666667	0.7	0.666667	0.8
Actin-related protein 2/3 complex subunit 3 OS=Homo sapiens OX=9606 GN=ARPC3 PE=1 SV=3	O15145	0.6	0.7	0.666667	0.636364	0.65	0.631579	0.8
Cleavage and polyadenylation specificity factor subunit 5 OS=Homo sapiens OX=9606 GN=NUDT21 PE=1 SV=1	O43809	0.6	0.6	0.6	0.6	0.6	0.6	0.8
Aldo-keto reductase family 1 member B10 OS=Homo sapiens OX=9606 GN=AKR1B10 PE=1 SV=2	O60218	0.8	0.7	0.727273	0.777778	0.75	0.761905	0.8
BAG family molecular chaperone regulator 2 OS=Homo sapiens OX=9606 GN=BAG2 PE=1 SV=1	O95816	0.6	0.6	0.6	0.6	0.6	0.6	0.8
Immunoglobulin heavy constant mu OS=Homo sapiens OX=9606 GN=IGHM PE=1 SV=4	P01871	0.7	0.7	0.7	0.7	0.7	0.7	0.8
Alpha-crystallin B chain OS=Homo sapiens OX=9606 GN=CRYAB PE=1 SV=2	P02511	0.7	0.5	0.583333	0.625	0.6	0.636364	0.8
Dolichyl-diphosphooligosaccharide--protein glycosyltransferase subunit 2 OS=Homo sapiens OX=9606 GN=RPN2 PE=1 SV=3	P04844	0.5	0.7	0.625	0.583333	0.6	0.555556	0.8
Integrin beta-1 OS=Homo sapiens OX=9606 GN=ITGB1 PE=1 SV=2	P05556	0.6	0.5	0.545455	0.555556	0.55	0.571429	0.8
Histone H1.4 OS=Homo sapiens OX=9606 GN=HIST1H1E PE=1 SV=2	P10412	0.7	0.8	0.777778	0.727273	0.75	0.736842	0.8
Moesin OS=Homo sapiens OX=9606 GN=MSN PE=1 SV=3	P26038	0.4	0.4	0.4	0.4	0.4	0.4	0.8
Leiomodin-1 OS=Homo sapiens OX=9606 GN=LMOD1 PE=1 SV=3	P29536	0.7	0.7	0.7	0.7	0.7	0.7	0.8
Serpin B9 OS=Homo sapiens OX=9606 GN=SERPINB9 PE=1 SV=1	P50453	0.7	0.7	0.7	0.7	0.7	0.7	0.8
[truncated: 1,097 more rows]

## Sheet: C
Table S1. Proteins identified in the rectal cancer tissue.
[truncated: 349 more rows]
