# Supplementary material for: Proteomic and metabolomic signatures of rectal tumor discriminate patients with different responses to preoperative radiotherapy
Source: Front Oncol. 2024 Feb 12;14:1323961. doi: 10.3389/fonc.2024.1323961 (PMC10896604; doi:10.3389/fonc.2024.1323961)
Supplement: Supplementary file 12 [file Table_2.xlsx]

## Sheet: A
Table S2. Metabolites identified in the rectal cancer tissue.
A. All metabolites annotated.
No	Metabolite name	HMDB	KEGG	Class	p-value (T-testT/U-Mann-WhitneyU)		FDR (Benjamini-Hochberg)	FC GR/PR (Fold changeF/Hodges-LehmannH)		Effect size GR/PR (Hedges'gH/RBCCR)
1	1,5-Anhydrosorbitol	HMDB0002712	C07326	Sugars	0.0266466	T	0.128639	2.03066	F	0.625	H
2	2-Aminoisobutyric acid	HMDB0001906	C03665	Amino acids	0.011655	U	0.0777001	0.474383	H	-0.7	R
3	2-hydroxyglutaric acid	HMDB0059655	C02630	Hydroxy acids	0.102367	T	0.351772	1.67343	F	0.821916	H
4	3-Oxoadipic acid	HMDB0000398	C00846	Keto acids	0.408245	U	0.595358	1.28393	H	0.25	R
5	3-Phosphoglyceric acid	HMDB0000807	C00597	Sugar acids	0.346351	U	0.564213	1.51823	H	0.460241	R
6	4-Hydroxybutyric acid	HMDB0000710	C01991	Hydroxy acids	0.000941786	T	0.0188357	0.45635	F	-1.91802	H
7	4-Hydroxyproline	HMDB0000725	C01157	Amino acids	0.0484067	T	0.233687	2.77689	F	1.01357	H
8	5-Aminopentanoic acid	HMDB0003355	C00431	Amino acids	0.89675	U	0.965731	0.942645	H	-0.05	R
9	Acetaminophen	HMDB0001859	C06804	Others	0.514786	U	0.667315	0.401339	H	-0.2	R
10	Alpha-Tocopherol	HMDB0001893	C02477	Sterols	0.828557	U	0.920619	0.89549	H	-0.075	R
11	Aminoadipic acid	HMDB0000510	C00956	Amino acids	0.0111132	U	0.11968	2.87865	H	1.36132	R
12	Aminomalonic acid	HMDB0001147	C00872	Carboxylic acids	0.343218	U	0.564213	0.773619	H	-0.463326	R
13	Arachidonic acid	HMDB0001043	C00219	Fatty acids	0.0374337	T	0.209629	0.722009	F	-1.07642	H
14	Ascorbic acid	HMDB0000044	C01041	Others	0.576142	T	0.762711	1.17058	F	0.270699	H
15	Beta-Aminopropionitrile	HMDB0004101	C05670	Others	0.26774	T	0.549311	0.864403	F	-0.544667	H
16	Cadaverine	HMDB0002322	C01672	Others	0.375154	U	0.59013	1.17975	H	0.43274	R
17	Cellobiose	HMDB0000055	C06422	Sugars	0.0675991	U	0.210308	3.14374	H	0.525	R
18	Citric acid	HMDB0000094	C00158	Carboxylic acids	0.0030623	U	0.0329786	2.77575	H	0.8	R
19	Creatinine	HMDB0000562	C00791	Amino acids	0.560222	U	0.762711	1.245	H	0.282192	R
20	Cysteinylglycine	HMDB0000078	C01419	Amino acids	0.172814	U	0.390225	0.0866548	H	-0.4	R
21	Cytidine monophosphate	HMDB0000095	C00055	Pyrimidine nucleotides	0.901822	T	0.942203	1.02726	F	0.0594499	H
22	Cytosine	HMDB0000630	C00380	Pyrimidines	0.000651878	U	0.0182526	3.76979	H	2.00132	R
23	D(-)-beta-hydroxy butyric acid	HMDB0000357	C01089	Hydroxy acids	0.236985	U	0.436552	0.618883	H	-0.35	R
24	D-Fructose	HMDB0000660	C02336	Sugars	0.172814	U	0.390225	1.48674	H	0.4	R
25	D-Galactose	HMDB0000143	C00984	Sugars	0.514786	U	0.667315	1.68172	H	0.2	R
26	D-Glucose	HMDB0000122	C00221	Sugars	0.0135016	U	0.126014	2.43275	H	1.31662	R
27	Dihydrouracil	HMDB0000076	C00429	Pirimidines	0.236985	U	0.436552	0.368685	H	-0.35	R
28	D-Ribose	HMDB0000283	C00121	Sugars	0.0342794	U	0.15481	1.68998	H	0.6	R
29	D-Ribose 5-phosphate	HMDB0001548	C00117	Sugar phosphates	0.00137118	T	0.0174514	3.97977	F	0.85	H
30	D-Xylulose	HMDB0001644	C00310	Sugars	0.03985	U	0.212024	1.92266	H	1.06124	R
31	Eicosenoic acid	HMDB0002231	C16526	Fatty acids	0.393464	T	0.598749	1.11281	F	0.415998	H
32	Ethanolamine	HMDB0000149	C00189	Amines	0.696467	T	0.819373	0.802911	F	-0.125	H
33	Fructose 6-phosphate	HMDB0000124	C00085	Sugar phosphates	0.633438	U	0.784791	1.27415	H	0.15	R
34	Fucose	HMDB0012327	C02781	Sugars	0.172814	U	0.390225	0.394469	H	-0.4	R
35	Fumaric acid	HMDB0000134	C00122	Carboxylic acids	0.408245	T	0.595358	0.794265	F	-0.25	H
36	Galactinol	HMDB0005826	C01235	Others	0.0696411	U	0.271632	0.638001	H	-0.922319	R
37	Galactose 1-phosphate	HMDB0000645	C00446	Sugar phosphates	0.941733	T	0.969431	1.01716	F	0.0352193	H
38	Galacturonic acid	HMDB0002545	C08348	Others	0.315417	U	0.496161	1.4126	H	0.3	R
39	Gamma-Aminobutyric acid	HMDB0000112	C00334	Amino acids	0.0675991	T	0.210308	1.85892	F	0.525	H
40	Gamma-Tocopherol	HMDB0001492	C02483	Tocopherols	0.315417	U	0.496161	2.16232	H	0.3	R
41	Glucose 6-phosphate	HMDB0001401	C00092	Sugar phosphates	0.101102	U	0.283084	1.58797	H	0.475	R
42	Glyceric acid	HMDB0000139	C00258	Sugar acids	0.0545272	T	0.190845	0.787538	F	-0.55	H
43	Glycerol	HMDB0000131	C00116	Sugar alcohols	0.274281	U	0.474066	1.19183	H	0.325	R
44	Glycerol 1-octadecanoate	HMDB0031075	NA	Glycerolipids	0.679076	U	0.812598	0.935814	H	-0.199884	R
45	Glycerol 3-phosphate	HMDB0000126	C00093	Sugar phosphates	0.203071	U	0.406143	1.32315	H	0.375	R
46	Glycine	HMDB0000123	C00037	Amino acids	0.0266466	T	0.128639	0.703638	F	-0.625	H
47	Glycolic acid	HMDB0000115	C03547	Hydroxy acids	0.15348	U	0.405418	0.699529	H	-0.710789	R
48	Glycyl-glycine	HMDB0011733	C02037	Amino acids	0.459756	T	0.65016	1.3452	F	0.225	H
49	Heptadecanoic acid	HMDB0002259	NA	Fatty acids	0.0330637	T	0.201258	0.80663	F	-1.10637	H
50	Hydrocinnamic acid	HMDB0000764	C05629	Phenylpropanoic acids	0.965401	U	1	1.03997	H	0.025	R
51	Hydroxylamine	HMDB0003338	C00192	Others	0.0545272	U	0.190845	0.652829	H	-0.55	R
52	Hydroxypropionic acid	HMDB0000700	C01013	Hydroxy acids	0.0434206	U	0.173683	0.560014	H	-0.575	R
53	Hypotaurine	HMDB0000965	C00519	Sulfinic acids	0.630951	U	0.784888	0.923943	H	-0.232314	R
54	Hypoxanthine	HMDB0000157	C00262	Purines	0.839856	U	0.922741	1.07311	H	0.0974264	R
55	Inosine	HMDB0000195	C00294	Purine nucleosides	0.00140065	T	0.0245114	3.32041	F	1.82856	H
56	Inositol 4-phosphate	HMDB0001313	C03546	Others	0.230889	U	0.50507	1.17331	H	0.59078	R
57	L-Alanine	HMDB0000161	C00041	Amino acids	0.0275837	U	0.184877	0.503908	H	-1.14967	R
58	L-Aspartic acid	HMDB0000191	C00049	Amino acids	0.315417	U	0.496161	2.08086	H	0.3	R
59	L-Carnitine	HMDB0000062	C00318	Others	0.000643114	T	0.0182526	0.474574	F	-2.00439	H
60	L-Cysteine	HMDB0000574	C00097	Amino acids	0.120011	U	0.365249	0.673236	H	-0.779063	R
61	L-Dehydroascorbic acid	HMDB0001264	C05422	Lactones	0.620186	U	0.782216	1.22891	H	0.239721	R
62	L-Glutamic acid	HMDB0000148	C00025	Amino acids	0.0154727	T	0.135386	1.67131	F	1.28516	H
63	L-Glutamine	HMDB0000641	C00064	Amino acids	0.00854701	U	0.0747863	1.9469	H	0.725	R
64	Linoleic acid	HMDB0000673	C01595	Fatty acids	0.0534326	T	0.236417	0.779327	F	-0.989075	H
65	L-Isoleucine	HMDB0000172	C00407	Amino acids	0.103701	T	0.351772	0.621817	F	-0.81846	H
66	L-Lactic acid	HMDB0000190	C00186	Hydroxy acid	0.572604	T	0.722203	0.402509	F	-0.81882	R
67	L-Leucine	HMDB0000687	C00123	Amino acids	0.965401	U	1	1.01018	H	0.025	R
68	L-Lysine	HMDB0000182	C00047	Amino acids	0.274281	U	0.474066	1.42086	H	0.325	R
69	L-Phenylalanine	HMDB0000159	C00079	Amino acids	0.761826	U	0.874227	1.146	H	0.1	R
70	L-Proline	HMDB0000162	C00148	Amino acids	0.121989	U	0.322235	0.511516	H	-0.45	R
71	L-Threonine	HMDB0000167	C00188	Amino acids	0.172814	U	0.390225	0.767783	H	-0.4	R
72	L-Tryptophan	HMDB0000929	C00078	Amino acids	0.572604	U	0.722203	1.15058	H	0.175	R
73	L-Tyrosine	HMDB0000158	C00082	Amino acids	0.696467	U	0.819373	1.23886	H	0.125	R
74	L-Valine	HMDB0000883	C00183	Amino acids	0.0545272	U	0.190845	0.514477	H	-0.55	R
75	Malic acid	HMDB0000744	C03668	Hydroxy acids	0.0717885	U	0.271632	1.54802	H	0.914558	R
76	Malonic acid	HMDB0000691	C04025	Carboxylic acids	0.012259	U	0.12259	1.42339	H	1.33882	R
77	Maltose	HMDB0037138	C00897	Sugars	0.0550036	T	0.236417	2.55422	F	0.981852	H
78	MG(0:0/16:0/0:0)	HMDB0011533	NA	Glycerolipids	0.0700155	T	0.271632	0.724478	F	-0.920951	H
79	MG(0:0/18:1(9Z)/0:0)	HMDB0011537	NA	Glycerolipids	0.00849479	U	0.0991059	0.477635	H	-1.42262	R
80	MG(16:0/0:0/0:0)	HMDB0011564	NA	Glycerolipids	0.216421	U	0.494515	0.866242	H	-0.610453	R
81	MG(18:1(9Z)/0:0/0:0)	HMDB0011567	NA	Glycerolipids	0.172814	T	0.390225	0.748586	F	-0.4	H
82	Myo-Inositol	HMDB0000211	C00137	Sugar alcohols	0.101102	U	0.283084	1.75117	H	0.475	R
83	Myristic acid	HMDB0000806	C06424	Fatty acids	0.778032	U	0.886015	0.957797	H	-0.135987	R
84	N-Acetyl-D-glucosamine	HMDB0000215	C00140	Acylaminosugars	0.38023	U	0.591469	0.670197	H	-0.428045	R
85	N-Acetyl-D-Glucosamine 6-Phosphate	HMDB0001062	C00357	Acylaminosugars	0.011655	U	0.0777001	4.73897	H	0.7	R
86	N-Acetyl-L-aspartic acid	HMDB0000812	C01042	Amino acids	0.172814	U	0.390225	1.34917	H	0.4	R
87	N-Acetylneuraminic acid	HMDB0000230	C19910	Others	0.988524	U	0.995636	1.00471	H	0.00693	R
88	N-Acetylserine	HMDB0002931	ND	Amino acids	0.609452	T	0.775666	0.910186	F	-0.247168	H
89	Niacinamide	HMDB0001406	C00153	Others	0.666902	T	0.811881	1.12212	F	0.207989	H
90	Oleic acid	HMDB0000207	C00712	Fatty acids	0.320262	T	0.562241	0.902122	F	-0.486563	H
91	Ornithine	HMDB0000214	C00077	Amino acids	0.354487	U	0.564213	1.38449	H	0.452318	R
92	Oxoglutaric acid	HMDB0000208	C00026	Keto acids	0.180125	U	0.466492	1.31411	H	0.664854	R
93	Palmitic acid	HMDB0000220	C00249	Fatty acids	0.203071	T	0.406143	0.664922	F	-0.375	H
94	Palmitoleic acid	HMDB0003229	C08362	Fatty acids	0.011655	U	0.0777001	0.751322	H	-0.7	R
95	Panose	HMDB0029937	C00713	Sugars	0.147317	U	0.396622	1.70183	H	0.722347	R
96	Pantothenic acid	HMDB0000210	C00864	Alcohols	0.200295	U	0.476795	0.730857	H	-0.633641	R
97	Pelargonic acid	HMDB0000847	C01601	Fatty acids	0.236985	U	0.436552	0.835117	H	-0.35	R
98	Phosphate	HMDB0001429	C00009	Phosphates	0.514786	U	0.667315	1.35184	H	0.2	R
99	Phosphoenolpyruvic acid	HMDB0000263	C00074	Phosphate esters	0.00205677	U	0.0239956	44.4642	H	0.825	R
100	Phosphoethanolamine	HMDB0000224	C00346	Phosphate esters	0.847424	T	0.922741	1.0349	F	0.0927579	H
101	Propylene glycol	HMDB0001881	C02912	Alcohols	0.778427	T	0.886015	0.958106	F	-0.135738	H
102	Putrescine	HMDB0001414	C00134	Amines	0.571957	U	0.762711	0.798655	H	-0.273704	R
103	Pyroglutamic acid	HMDB0000267	C01879	Amino acids	0.236985	U	0.436552	1.32568	H	0.35	R
104	Pyrophosphate	HMDB0000250	C00013	Pyrophosphates	0.965401	T	1	0.993542	F	-0.025	H
105	Quinic acid	HMDB0003072	C00296	Polyols	0.104435	U	0.351772	2.96229	H	0.816577	R
106	Quinolinic acid	HMDB0000232	C03722	Pyridinecarboxylic acids	0.274281	U	0.474066	1.52332	H	0.325	R
107	Ribitol	HMDB0000508	C00474	Sugar alcohols	0.315417	T	0.496161	1.8567	F	0.3	H
108	Sarcosine	HMDB0000271	C00213	Amino acids	0.0359194	U	0.20953	0.506132	H	-1.08641	R
109	Serine	HMDB0062263	C00716	Amino acids	0.203071	U	0.406143	0.810568	H	-0.375	R
110	Serotonin	HMDB0000259	C00780	Serotonins	0.77759	U	0.886015	1.15031	H	0.136266	R
111	Sorbitol	HMDB0000247	C00794	Sugar alcohols	0.828557	U	0.920619	0.743499	H	-0.075	R
112	Spermidine	HMDB0001257	C00315	Amines	0.736012	T	0.873235	1.14557	F	0.162732	H
113	Spermine	HMDB0001256	C00750	Amines	0.965401	T	1	1.01163	F	0.025	H
114	Stearic acid	HMDB0000827	C01530	Fatty acids	0.220963	T	0.494515	1.23479	F	0.604168	H
115	Succinic acid	HMDB0000254	C00042	Carboxylic acids	0.00343111	U	0.0533728	0.63736	H	-1.62729	R
116	Uracil	HMDB0000300	C00106	Pyrimidines	0.00612379	U	0.081186	0.255086	H	-1.4968	R
117	Urea	HMDB0000294	C00086	Others	0.242128	U	0.518472	0.860051	H	-0.576152	R
118	Uridine	HMDB0000296	C00299	Pyrimidine nucleosides	0.6791	U	0.812598	1.12704	H	0.199868	R
119	Uridine diphosphate-N-acetylglucosamine	HMDB0000290	C00043	Pyrimidine nucleosides	0.492886	T	0.69129	1.11494	F	0.332894	H

## Sheet: B
Table S2. Metabolites identified in the rectal cancer tissue.
B. Performance of univariate classification models based on specific metabolites.
Metabolite name	HMDB	KEGG	TPR	TNR	PPV	ACC	F1	ROC_AUC
1,5-Anhydrosorbitol	HMDB0002712	C07326	1	0	0.555556	0.5	0.714286	0.8125
2-Aminoisobutyric acid	HMDB0001906	C03665	1	0	0.555556	0.5	0.714286	0.85
2-hydroxyglutaric acid	HMDB0059655	C02630	1	0	0.555556	0.5	0.714286	0.75
3-Oxoadipic acid	HMDB0000398	C00846	1	0	0.555556	0.5	0.714286	0.625
3-Phosphoglyceric acid	HMDB0000807	C00597	1	0	0.555556	0.5	0.714286	0.725
4-Hydroxybutyric acid	HMDB0000710	C01991	1	0	0.555556	0.5	0.714286	0.9375
4-Hydroxyproline	HMDB0000725	C01157	1	0	0.555556	0.5	0.714286	0.775
5-Aminopentanoic acid	HMDB0003355	C00431	1	0	0.555556	0.5	0.714286	0.525
Acetaminophen	HMDB0001859	C06804	1	0	0.555556	0.5	0.714286	0.4
Alpha-Tocopherol	HMDB0001893	C02477	1	0	0.555556	0.5	0.714286	0.5375
Aminoadipic acid	HMDB0000510	C00956	1	0	0.555556	0.5	0.714286	0.8625
Aminomalonic acid	HMDB0001147	C00872	1	0	0.555556	0.5	0.714286	0.6125
Arachidonic acid	HMDB0001043	C00219	1	0	0.555556	0.5	0.714286	0.7625
Ascorbic acid	HMDB0000044	C01041	1	0	0.555556	0.5	0.714286	0.675
Beta-Aminopropionitrile	HMDB0004101	C05670	1	0	0.555556	0.5	0.714286	0.6625
Cadaverine	HMDB0002322	C01672	1	0	0.555556	0.5	0.714286	0.6375
Cellobiose	HMDB0000055	C06422	1	0	0.555556	0.5	0.714286	0.7625
Citric acid	HMDB0000094	C00158	1	0	0.555556	0.5	0.714286	0.9
Creatinine	HMDB0000562	C00791	1	0	0.555556	0.5	0.714286	0.55
Cysteinylglycine	HMDB0000078	C01419	1	0	0.555556	0.5	0.714286	0.7
Cytidine monophosphate	HMDB0000095	C00055	1	0	0.555556	0.5	0.714286	0.5
Cytosine	HMDB0000630	C00380	1	0	0.555556	0.5	0.714286	0.9875
D(-)-beta-hydroxy butyric acid	HMDB0000357	C01089	1	0	0.555556	0.5	0.714286	0.675
D-Fructose	HMDB0000660	C02336	1	0	0.555556	0.5	0.714286	0.7
D-Galactose	HMDB0000143	C00984	1	0	0.555556	0.5	0.714286	0.4
D-Glucose	HMDB0000122	C00221	1	0	0.555556	0.5	0.714286	0.8375
Dihydrouracil	HMDB0000076	C00429	1	0	0.555556	0.5	0.714286	0.675
D-Ribose	HMDB0000283	C00121	1	0	0.555556	0.5	0.714286	0.8
D-Ribose 5-phosphate	HMDB0001548	C00117	1	0	0.555556	0.5	0.714286	0.925
D-Xylulose	HMDB0001644	C00310	1	0	0.555556	0.5	0.714286	0.7875
Eicosenoic acid	HMDB0002231	C16526	1	0	0.555556	0.5	0.714286	0.6
Ethanolamine	HMDB0000149	C00189	1	0	0.555556	0.5	0.714286	0.5625
Fructose 6-phosphate	HMDB0000124	C00085	1	0	0.555556	0.5	0.714286	0.425
Fucose	HMDB0012327	C02781	1	0	0.555556	0.5	0.714286	0.7
Fumaric acid	HMDB0000134	C00122	1	0	0.555556	0.5	0.714286	0.625
Galactinol	HMDB0005826	C01235	1	0	0.555556	0.5	0.714286	0.7125
Galactose 1-phosphate	HMDB0000645	C00446	1	0	0.555556	0.5	0.714286	0.5625
Galacturonic acid	HMDB0002545	C08348	1	0	0.555556	0.5	0.714286	0.65
Gamma-Aminobutyric acid	HMDB0000112	C00334	1	0	0.555556	0.5	0.714286	0.7625
Gamma-Tocopherol	HMDB0001492	C02483	1	0	0.555556	0.5	0.714286	0.35
Glucose 6-phosphate	HMDB0001401	C00092	1	0	0.555556	0.5	0.714286	0.2625
Glyceric acid	HMDB0000139	C00258	1	0	0.555556	0.5	0.714286	0.775
Glycerol	HMDB0000131	C00116	1	0	0.555556	0.5	0.714286	0.6625
Glycerol 1-octadecanoate	HMDB0031075	NA	1	0	0.555556	0.5	0.714286	0.525
Glycerol 3-phosphate	HMDB0000126	C00093	1	0	0.555556	0.5	0.714286	0.6875
Glycine	HMDB0000123	C00037	1	0	0.555556	0.5	0.714286	0.8125
Glycolic acid	HMDB0000115	C03547	1	0	0.555556	0.5	0.714286	0.75
Glycyl-glycine	HMDB0011733	C02037	1	0	0.555556	0.5	0.714286	0.6125
Heptadecanoic acid	HMDB0002259	NA	1	0	0.555556	0.5	0.714286	0.7875
Hydrocinnamic acid	HMDB0000764	C05629	1	0	0.555556	0.5	0.714286	0.5125
Hydroxylamine	HMDB0003338	C00192	1	0	0.555556	0.5	0.714286	0.775
Hydroxypropionic acid	HMDB0000700	C01013	1	0	0.555556	0.5	0.714286	0.7875
Hypotaurine	HMDB0000965	C00519	1	0	0.555556	0.5	0.714286	0.5
Hypoxanthine	HMDB0000157	C00262	1	0	0.555556	0.5	0.714286	0.6
Inosine	HMDB0000195	C00294	1	0	0.555556	0.5	0.714286	0.9625
Inositol 4-phosphate	HMDB0001313	C03546	1	0	0.555556	0.5	0.714286	0.65
L-Alanine	HMDB0000161	C00041	1	0	0.555556	0.5	0.714286	0.8125
L-Aspartic acid	HMDB0000191	C00049	1	0	0.555556	0.5	0.714286	0.65
L-Carnitine	HMDB0000062	C00318	1	0	0.555556	0.5	0.714286	0.95
L-Cysteine	HMDB0000574	C00097	1	0	0.555556	0.5	0.714286	0.6875
L-Dehydroascorbic acid	HMDB0001264	C05422	1	0	0.555556	0.5	0.714286	0.5
L-Glutamic acid	HMDB0000148	C00025	1	0	0.555556	0.5	0.714286	0.825
L-Glutamine	HMDB0000641	C00064	1	0	0.555556	0.5	0.714286	0.8625
Linoleic acid	HMDB0000673	C01595	1	0	0.555556	0.5	0.714286	0.725
L-Isoleucine	HMDB0000172	C00407	1	0	0.555556	0.5	0.714286	0.775
L-Lactic acid	HMDB0000190	C00186	1	0	0.555556	0.5	0.714286	0.5875
L-Leucine	HMDB0000687	C00123	1	0	0.555556	0.5	0.714286	0.4875
L-Lysine	HMDB0000182	C00047	1	0	0.555556	0.5	0.714286	0.3375
L-Phenylalanine	HMDB0000159	C00079	1	0	0.555556	0.5	0.714286	0.45
L-Proline	HMDB0000162	C00148	1	0	0.555556	0.5	0.714286	0.725
L-Threonine	HMDB0000167	C00188	1	0	0.555556	0.5	0.714286	0.7
L-Tryptophan	HMDB0000929	C00078	1	0	0.555556	0.5	0.714286	0.5875
L-Tyrosine	HMDB0000158	C00082	1	0	0.555556	0.5	0.714286	0.4375
L-Valine	HMDB0000883	C00183	1	0	0.555556	0.5	0.714286	0.775
Malic acid	HMDB0000744	C03668	1	0	0.555556	0.5	0.714286	0.7625
Malonic acid	HMDB0000691	C04025	1	0	0.555556	0.5	0.714286	0.85
Maltose	HMDB0037138	C00897	1	0	0.555556	0.5	0.714286	0.8125
MG(0:0/16:0/0:0)	HMDB0011533	NA	1	0	0.555556	0.5	0.714286	0.6875
MG(0:0/18:1(9Z)/0:0)	HMDB0011537	NA	1	0	0.555556	0.5	0.714286	0.8875
MG(16:0/0:0/0:0)	HMDB0011564	NA	1	0	0.555556	0.5	0.714286	0.6625
MG(18:1(9Z)/0:0/0:0)	HMDB0011567	NA	1	0	0.555556	0.5	0.714286	0.7
Myo-Inositol	HMDB0000211	C00137	1	0	0.555556	0.5	0.714286	0.7375
Myristic acid	HMDB0000806	C06424	1	0	0.555556	0.5	0.714286	0.5125
N-Acetyl-D-glucosamine	HMDB0000215	C00140	1	0	0.555556	0.5	0.714286	0.6875
N-Acetyl-D-Glucosamine 6-Phosphate	HMDB0001062	C00357	1	0	0.555556	0.5	0.714286	0.85
N-Acetyl-L-aspartic acid	HMDB0000812	C01042	1	0	0.555556	0.5	0.714286	0.7
N-Acetylneuraminic acid	HMDB0000230	C19910	1	0	0.555556	0.5	0.714286	0.5375
N-Acetylserine	HMDB0002931	ND	1	0	0.555556	0.5	0.714286	0.5375
Niacinamide	HMDB0001406	C00153	1	0	0.555556	0.5	0.714286	0.5625
Oleic acid	HMDB0000207	C00712	1	0	0.555556	0.5	0.714286	0.6375
Ornithine	HMDB0000214	C00077	1	0	0.555556	0.5	0.714286	0.65
Oxoglutaric acid	HMDB0000208	C00026	1	0	0.555556	0.5	0.714286	0.65
Palmitic acid	HMDB0000220	C00249	1	0	0.555556	0.5	0.714286	0.6875
Palmitoleic acid	HMDB0003229	C08362	1	0	0.555556	0.5	0.714286	0.85
Panose	HMDB0029937	C00713	1	0	0.555556	0.5	0.714286	0.7125
Pantothenic acid	HMDB0000210	C00864	1	0	0.555556	0.5	0.714286	0.625
Pelargonic acid	HMDB0000847	C01601	1	0	0.555556	0.5	0.714286	0.675
Phosphate	HMDB0001429	C00009	1	0	0.555556	0.5	0.714286	0.6
Phosphoenolpyruvic acid	HMDB0000263	C00074	1	0	0.555556	0.5	0.714286	0.9125
Phosphoethanolamine	HMDB0000224	C00346	1	0	0.555556	0.5	0.714286	0.575
Propylene glycol	HMDB0001881	C02912	1	0	0.555556	0.5	0.714286	0.6875
Putrescine	HMDB0001414	C00134	1	0	0.555556	0.5	0.714286	0.6
Pyroglutamic acid	HMDB0000267	C01879	1	0	0.555556	0.5	0.714286	0.675
Pyrophosphate	HMDB0000250	C00013	1	0	0.555556	0.5	0.714286	0.4875
Quinic acid	HMDB0003072	C00296	1	0	0.555556	0.5	0.714286	0.7125
Quinolinic acid	HMDB0000232	C03722	1	0	0.555556	0.5	0.714286	0.6625
Ribitol	HMDB0000508	C00474	1	0	0.555556	0.5	0.714286	0.65
Sarcosine	HMDB0000271	C00213	1	0	0.555556	0.5	0.714286	0.8125
Serine	HMDB0062263	C00716	1	0	0.555556	0.5	0.714286	0.6875
Serotonin	HMDB0000259	C00780	1	0	0.555556	0.5	0.714286	0.525
Sorbitol	HMDB0000247	C00794	1	0	0.555556	0.5	0.714286	0.4625
Spermidine	HMDB0001257	C00315	1	0	0.555556	0.5	0.714286	0.5625
Spermine	HMDB0001256	C00750	1	0	0.555556	0.5	0.714286	0.5125
Stearic acid	HMDB0000827	C01530	1	0	0.555556	0.5	0.714286	0.675
Succinic acid	HMDB0000254	C00042	1	0	0.555556	0.5	0.714286	0.85
Uracil	HMDB0000300	C00106	1	0	0.555556	0.5	0.714286	0.95
Urea	HMDB0000294	C00086	1	0	0.555556	0.5	0.714286	0.6
Uridine	HMDB0000296	C00299	1	0	0.555556	0.5	0.714286	0.55
Uridine diphosphate-N-acetylglucosamine	HMDB0000290	C00043	1	0	0.555556	0.5	0.714286	0.6125

## Sheet: C
Table S2. Metabolites identified in the rectal cancer tissue.
C. Metabolomic features selected based on multivariate ROC curve analysis with their frequencies of being selected and mean importance measure.
Metabolite name	Rank Freq.	Importance	GR	PR
Uracil	1	0.0019538	Low	High
4-Hydroxybutyric acid	1	0.00189702	Low	High
L-Alanine	1	0.0019	Low	High
Cytosine	1	0.00138546	High	Low
MG(0:0/18:1(9Z)/0:0)	1	0.00114479	Low	High
Aminoadipic acid	1	0.00114325	High	Low
L-Carnitine	1	0.00110042	Low	High
Phosphoenolpyruvic acid	0.98	0.00135853	High	Low
Succinic acid	0.98	0.00122201	Low	High
Inosine	0.98	0.00106724	High	Low
L-Glutamic acid	0.96	0.00168204	High	Low
D-Xylulose	0.92	0.00095685	High	Low
Palmitoleic acid	0.88	0.000927645	Low	High
Arachidonic acid	0.86	0.000785235	Low	High
D-Ribose 5-phosphate	0.84	0.000978752	High	Low
Malonic acid	0.82	0.000901657	High	Low
2-Aminoisobutyric acid	0.82	0.000811701	Low	High
MG(0:0/16:0/0:0)	0.82	0.000672855	Low	High
L-Glutamine	0.8	0.00151046	High	Low
D-Glucose	0.78	0.000774807	High	Low
Heptadecanoic acid	0.76	0.000940809	Low	High
Malic acid	0.76	0.000797882	High	Low
1,5-Anhydro-D-glucitol	0.72	0.000698567	High	Low
Citric acid	0.68	0.000719227	High	Low
Hydroxypropionic acid	0.68	0.000601493	Low	High
Glycolic acid	0.66	0.000731508	Low	High
N-Acetyl-D-glucosamine	0.66	0.000647131	Low	High
L-Isoleucine	0.66	0.000575842	Low	High
L-Valine	0.62	0.000522814	Low	High
Galactinol	0.6	0.000703118	Low	High
MG(18:1(9Z)/0:0/0:0)	0.6	0.000665993	Low	High
Glycine	0.6	0.000659396	Low	High
N-Acetyl-D-Glucosamine 6-Phosphate	0.58	0.000676902	High	Low
Maltose	0.58	0.000576559	High	Low
Pelargonic acid	0.58	0.000571086	Low	High
Dihydrouracil	0.56	0.000770038	Low	High
Cellobiose	0.56	0.000594355	High	Low
Cysteinylglycine	0.54	0.000672206	Low	High
L-Lactic acid	0.54	0.000629465	Low	High
Fucose	0.54	0.000530225	Low	High
L-Proline	0.54	0.000499403	Low	High
Linoleic acid	0.52	0.000463331	Low	High
4-Hydroxyproline	0.5	0.000498324	High	Low
Ethanolamine	0.46	0.000511428	Low	High
Stearic acid	0.46	0.000441633	High	Low
Serine	0.46	0.000439517	Low	High
Gamma-Tocopherol	0.44	0.000500814	High	Low
Myo-Inositol	0.42	0.000586815	High	Low
Palmitic acid	0.42	0.000536555	Low	High
L-Cysteine	0.42	0.000435112	Low	High
Propylene glycol	0.4	0.000621312	Low	High
Eicosenoic acid	0.4	0.000476337	High	Low
Fumaric acid	0.4	0.000431257	Low	High
D-Ribose	0.4	0.000413319	High	Low
Gamma-Aminobutyric acid	0.38	0.000758149	High	Low
Sorbitol	0.38	0.000359835	Low	High
2-hydroxyglutaric acid	0.38	0.000325897	High	Low
Glyceric acid	0.36	0.000500468	Low	High
Niacinamide	0.36	0.000457857	High	Low
Beta-Aminopropionitrile	0.36	0.000354424	Low	High
N-Acetyl-L-aspartic acid	0.36	0.00032423	High	Low
MG(16:0/0:0/0:0)	0.34	0.000407214	Low	High
Pyrophosphate	0.34	0.000368138	High	Low
Galacturonic acid	0.34	0.000347491	High	Low
Pyroglutamic acid	0.32	0.000392335	High	Low
3-Phosphoglyceric acid	0.32	0.000370184	High	Low
Sarcosine	0.32	0.000366018	Low	High
D(-)-beta-hydroxy butyric acid	0.3	0.00034404	Low	High
L-Aspartic acid	0.3	0.000340068	High	Low
Cadaverine	0.3	0.000325865	High	Low
L-Threonine	0.28	0.000358576	Low	High
Inositol 4-phosphate	0.28	0.000325981	High	Low
Glucose 6-phosphate	0.26	0.000372421	High	Low
L-Lysine	0.26	0.000292123	High	Low
Quinolinic acid	0.26	0.000235465	High	Low
Pantothenic acid	0.24	0.000256771	High	Low
Hypotaurine	0.22	0.000304966	High	Low
Fructose 6-phosphate	0.22	0.000289977	High	Low
N-Acetylneuraminic acid	0.22	0.000270176	High	Low
Glycerol 3-phosphate	0.22	0.000248457	High	Low
Ornithine	0.22	0.000215854	High	Low
D-Fructose	0.2	0.000241953	High	Low
Cytidine monophosphate	0.2	0.000231225	High	Low
Urea	0.2	0.000222546	Low	High
Alpha-Tocopherol	0.2	0.000167748	Low	High
Glycerol	0.18	0.000320807	High	Low
Acetaminophen	0.18	0.000308452	Low	High
Hydrocinnamic acid	0.18	0.000265292	High	Low
Hypoxanthine	0.16	0.000242025	High	Low
5-Aminopentanoic acid	0.16	0.000214571	Low	High
Hydroxylamine	0.16	0.000196051	Low	High
Oxoglutaric acid	0.16	0.00018552	High	Low
Ascorbic acid	0.14	0.000237005	High	Low
L-Dehydroascorbic acid	0.14	0.000221463	Low	High
Glycyl-glycine	0.14	0.00014283	High	Low
Oleic acid	0.12	0.000214775	Low	High
Ribitol	0.12	0.000209231	High	Low
Myristic acid	0.12	0.000209045	High	Low
Quinic acid	0.12	0.000191605	High	Low
Galactose 1-phosphate	0.12	0.000166489	High	Low
Spermine	0.12	0.000158222	Low	High
Phosphoethanolamine	0.1	0.0001872	High	Low
D-Galactose	0.1	0.000180186	High	Low
Phosphate	0.1	0.000155202	High	Low
Spermidine	0.1	0.000153073	High	Low
Glycerol 1-octadecanoate	0.1	0.000148916	High	Low
Aminomalonic acid	0.08	0.00014069	Low	High
Uridine	0.08	0.000110461	High	Low
N-Acetylserine	0.08	9.67899e-05	Low	High
L-Leucine	0.06	0.000167896	High	Low
L-Tryptophan	0.06	0.000164057	High	Low
L-Tyrosine	0.06	0.000159052	High	Low
Uridine diphosphate-N-acetylglucosamine	0.06	0.000144903	High	Low
3-Oxoadipic acid	0.06	0.000118782	High	Low
Panose	0.04	0.000133369	High	Low
Putrescine	0.04	9.89254e-05	Low	High
Serotonin	0.04	7.73157e-05	High	Low
L-Phenylalanine	0.04	6.34918e-05	High	Low
Creatinine	0.02	8.43897e-05	Low	High
