# Supplementary material for: Proteomic and metabolomic signatures of rectal tumor discriminate patients with different responses to preoperative radiotherapy
Source: Front Oncol. 2024 Feb 12;14:1323961. doi: 10.3389/fonc.2024.1323961 (PMC10896604; doi:10.3389/fonc.2024.1323961)
Supplement: Supplementary file 13 [file Table_3.xlsx]

## Sheet: BP
Table S3. Functional enrichment analysis of DAPs performed using GO terms (BP-Biological Processes).
#term ID	term description	observed gene count	background gene count	strength	false discovery rate	matching proteins in your network (IDs)	matching proteins in your network (labels)
GO:0019885	Antigen processing and presentation of endogenous peptide antigen via mhc class i	10	10	1.03	4.35e-05	9606.ENSP00000265986,9606.ENSP00000296754,9606.ENSP00000346206,9606.ENSP00000364034,9606.ENSP00000365402,9606.ENSP00000379873,9606.ENSP00000399168,9606.ENSP00000400376,9606.ENSP00000404833,9606.ENSP00000452780	IDE,ERAP1,TAP1,TAP2,HLA-C,HLA-A,HLA-B,ERAP2,TAPBP,B2M
GO:0006102	Isocitrate metabolic process	6	6	1.03	0.0037	9606.ENSP00000216254,9606.ENSP00000217901,9606.ENSP00000299518,9606.ENSP00000331897,9606.ENSP00000370223,9606.ENSP00000390265	ACO2,IDH3G,IDH3A,IDH2,IDH3B,IDH1
GO:0075525	Viral translational termination-reinitiation	5	5	1.03	0.0115	9606.ENSP00000216190,9606.ENSP00000253108,9606.ENSP00000354125,9606.ENSP00000358140,9606.ENSP00000485663	EIF3D,EIF3G,EIF3B,EIF3A,EIF3L
GO:0045040	Protein insertion into mitochondrial outer membrane	4	4	1.03	0.0347	9606.ENSP00000216034,9606.ENSP00000302961,9606.ENSP00000335153,9606.ENSP00000345445	TOMM22,HSPA4,HSP90AA1,SAMM50
GO:0001732	Formation of cytoplasmic translation initiation complex	15	16	1	2.59e-07	9606.ENSP00000216190,9606.ENSP00000216554,9606.ENSP00000220849,9606.ENSP00000248342,9606.ENSP00000253108,9606.ENSP00000261868,9606.ENSP00000332604,9606.ENSP00000354125,9606.ENSP00000358140,9606.ENSP00000362688,9606.ENSP00000364119,9606.ENSP00000429931,9606.ENSP00000431800,9606.ENSP00000436049,9606.ENSP00000485663	EIF3D,EIF5,EIF3E,EIF3K,EIF3G,EIF3J,EIF3C,EIF3B,EIF3A,EIF3I,EIF2S2,EIF3H,EIF3F,EIF3M,EIF3L
GO:1904851	Positive regulation of establishment of protein localization to telomere	9	10	0.98	0.00022	9606.ENSP00000258091,9606.ENSP00000275603,9606.ENSP00000280326,9606.ENSP00000286788,9606.ENSP00000295688,9606.ENSP00000299300,9606.ENSP00000317334,9606.ENSP00000358563,9606.ENSP00000377958	CCT7,CCT6A,CCT5,CCT8,CCT3,CCT2,TCP1,DKC1,CCT4
GO:0019076	Viral release from host cell	5	6	0.95	0.0183	9606.ENSP00000238497,9606.ENSP00000265062,9606.ENSP00000303754,9606.ENSP00000419425,9606.ENSP00000438399	VPS4B,RAB7A,PPID,PPIA,IST1
GO:0055129	L-proline biosynthetic process	5	6	0.95	0.0183	9606.ENSP00000220966,9606.ENSP00000342502,9606.ENSP00000357838,9606.ENSP00000360268,9606.ENSP00000384949	PYCRL,PYCR2,OAT,ALDH18A1,PYCR1
GO:1990668	Vesicle fusion with endoplasmic reticulum-golgi intermediate compartment (ergic) membrane	5	6	0.95	0.0183	9606.ENSP00000317714,9606.ENSP00000320866,9606.ENSP00000346206,9606.ENSP00000364034,9606.ENSP00000404833	STX4,CALR,TAP1,TAP2,TAPBP
GO:1904871	Positive regulation of protein localization to cajal body	9	11	0.94	0.00036	9606.ENSP00000258091,9606.ENSP00000275603,9606.ENSP00000280326,9606.ENSP00000286788,9606.ENSP00000295688,9606.ENSP00000299300,9606.ENSP00000317334,9606.ENSP00000358563,9606.ENSP00000377958	CCT7,CCT6A,CCT5,CCT8,CCT3,CCT2,TCP1,DKC1,CCT4
GO:0000338	Protein deneddylation	8	10	0.93	0.0011	9606.ENSP00000264389,9606.ENSP00000268717,9606.ENSP00000299259,9606.ENSP00000304102,9606.ENSP00000346340,9606.ENSP00000350512,9606.ENSP00000362710,9606.ENSP00000376167	COPS4,COPS3,COPS2,COPS6,COPS8,COPS5,COPS7B,GPS1
GO:0075522	IRES-dependent viral translational initiation	8	10	0.93	0.0011	9606.ENSP00000216190,9606.ENSP00000349428,9606.ENSP00000352438,9606.ENSP00000354125,9606.ENSP00000358140,9606.ENSP00000360365,9606.ENSP00000386636,9606.ENSP00000431800	EIF3D,PTBP1,PCBP2,EIF3B,EIF3A,MCTS1,SSB,EIF3F
GO:1902415	Regulation of mrna binding	8	10	0.93	0.0011	9606.ENSP00000216190,9606.ENSP00000220849,9606.ENSP00000221419,9606.ENSP00000269349,9606.ENSP00000325690,9606.ENSP00000332604,9606.ENSP00000359506,9606.ENSP00000416255	EIF3D,EIF3E,HNRNPL,EIF4A3,CARM1,EIF3C,FMR1,EIF4G1
GO:0072350	Tricarboxylic acid metabolic process	11	14	0.92	6.29e-05	9606.ENSP00000216254,9606.ENSP00000217901,9606.ENSP00000253792,9606.ENSP00000277865,9606.ENSP00000299518,9606.ENSP00000309477,9606.ENSP00000331897,9606.ENSP00000342056,9606.ENSP00000361471,9606.ENSP00000370223,9606.ENSP00000390265	ACO2,IDH3G,ACLY,GLUD1,IDH3A,ACO1,IDH2,CS,ASS1,IDH3B,IDH1
GO:1905216	Positive regulation of rna binding	7	9	0.92	0.0032	9606.ENSP00000216190,9606.ENSP00000220849,9606.ENSP00000221419,9606.ENSP00000332604,9606.ENSP00000359506,9606.ENSP00000364289,9606.ENSP00000416255	EIF3D,EIF3E,HNRNPL,EIF3C,FMR1,NCBP1,EIF4G1
GO:1904816	Positive regulation of protein localization to chromosome, telomeric region	10	13	0.91	0.00019	9606.ENSP00000258091,9606.ENSP00000268058,9606.ENSP00000275603,9606.ENSP00000280326,9606.ENSP00000286788,9606.ENSP00000295688,9606.ENSP00000299300,9606.ENSP00000317334,9606.ENSP00000358563,9606.ENSP00000377958	CCT7,PML,CCT6A,CCT5,CCT8,CCT3,CCT2,TCP1,DKC1,CCT4
GO:0006614	SRP-dependent cotranslational protein targeting to membrane	72	96	0.9	9.02e-31	9606.ENSP00000222247,9606.ENSP00000223641,9606.ENSP00000225430,9606.ENSP00000230050,9606.ENSP00000251453,9606.ENSP00000259469,9606.ENSP00000262213,9606.ENSP00000262584,9606.ENSP00000267884,9606.ENSP00000270625,9606.ENSP00000272317,9606.ENSP00000278572,9606.ENSP00000296674,9606.ENSP00000302896,9606.ENSP00000305230,9606.ENSP00000307889,9606.ENSP00000309334,9606.ENSP00000309830,9606.ENSP00000311430,…	RPL18A,SEC61B,RPL19,RPS12,RPS16,RPL35,TRAM1,RPL8,SRP14,RPS11,RPS27A,RPS3,RPS23,RPS9,SRP9,RPL13,RPL15,RPL38,RPL4,RPS15A,RPLP2,RPS7,RPL7,RPS2,RPS21,RPL3,RPL27A,RPL21,RPS17,RPSA,RPL22,RPS26,RPL12,RPS27,SEC63,RPL5,RPL7A,RPS4X,RPL10A,RPL11,RPS6,RPL24,RPL34,RPL14,RPS8,RPS14,RPL31,UBA52,RPL23A,RPS18,RPL17,RPL9,RPL6,RPL10,RPS24,RPL32,RPL37A,RPL35A,RPL23,SRP19,RPL30,RPS20,RPS25,RPS13,RPL18,RPLP0,RPL28,RPL…
GO:0009113	Purine nucleobase biosynthetic process	9	12	0.9	0.00056	9606.ENSP00000216605,9606.ENSP00000298556,9606.ENSP00000313490,9606.ENSP00000318868,9606.ENSP00000361512,9606.ENSP00000367615,9606.ENSP00000382595,9606.ENSP00000419851,9606.ENSP00000478253	MTHFD1,HPRT1,PFAS,SHMT1,PRPS1,APRT,PAICS,GMPS,MTHFD1L
GO:1905214	Regulation of rna binding	9	12	0.9	0.00056	9606.ENSP00000216190,9606.ENSP00000220849,9606.ENSP00000221419,9606.ENSP00000269349,9606.ENSP00000325690,9606.ENSP00000332604,9606.ENSP00000359506,9606.ENSP00000364289,9606.ENSP00000416255	EIF3D,EIF3E,HNRNPL,EIF4A3,CARM1,EIF3C,FMR1,NCBP1,EIF4G1
GO:0061684	Chaperone-mediated autophagy	6	8	0.9	0.0094	9606.ENSP00000306015,9606.ENSP00000335153,9606.ENSP00000346437,9606.ENSP00000358081,9606.ENSP00000408411,9606.ENSP00000432083	SYNPO2,HSP90AA1,ATG7,BAG3,LAMP2,HSPA8
GO:1902416	Positive regulation of mrna binding	6	8	0.9	0.0094	9606.ENSP00000216190,9606.ENSP00000220849,9606.ENSP00000221419,9606.ENSP00000332604,9606.ENSP00000359506,9606.ENSP00000416255	EIF3D,EIF3E,HNRNPL,EIF3C,FMR1,EIF4G1
GO:0006413	Translational initiation	104	141	0.89	3.48e-44	9606.ENSP00000216190,9606.ENSP00000216554,9606.ENSP00000220592,9606.ENSP00000220849,9606.ENSP00000222247,9606.ENSP00000225430,9606.ENSP00000230050,9606.ENSP00000248342,9606.ENSP00000251453,9606.ENSP00000253039,9606.ENSP00000253108,9606.ENSP00000256383,9606.ENSP00000259469,9606.ENSP00000261868,9606.ENSP00000262584,9606.ENSP00000265753,9606.ENSP00000270625,9606.ENSP00000272317,9606.ENSP00000278572,…	EIF3D,EIF5,AGO2,EIF3E,RPL18A,RPL19,RPS12,EIF3K,RPS16,EIF2S3,EIF3G,EIF2S1,RPL35,EIF3J,RPL8,EIF4H,RPS11,RPS27A,RPS3,EIF5B,EIF4A1,ABCE1,RPS23,PAIP1,RPS9,RPL13,RPL15,RPL38,RPL4,PABPC1,ABCF1,RPS15A,RPLP2,EIF3C,LARP1,RPS7,RPL7,RPS2,RPS21,RPL3,RPL27A,RPL21,RPS17,RPSA,RPL22,RPS26,COPS5,EIF3B,RPL12,RPS27,EIF3A,RPL5,MCTS1,RPL7A,EIF3I,RPS4X,RPL10A,EIF6,RPL11,EIF2S2,EIF1AX,RPS6,RPL24,RPL34,RPL14,RPS8,DDX3X,R…
GO:0006613	Cotranslational protein targeting to membrane	73	100	0.89	1.11e-30	9606.ENSP00000222247,9606.ENSP00000223641,9606.ENSP00000225430,9606.ENSP00000230050,9606.ENSP00000251453,9606.ENSP00000259469,9606.ENSP00000262213,9606.ENSP00000262584,9606.ENSP00000267884,9606.ENSP00000270625,9606.ENSP00000272317,9606.ENSP00000278572,9606.ENSP00000296674,9606.ENSP00000302896,9606.ENSP00000305230,9606.ENSP00000306788,9606.ENSP00000307889,9606.ENSP00000309334,9606.ENSP00000309830,…	RPL18A,SEC61B,RPL19,RPS12,RPS16,RPL35,TRAM1,RPL8,SRP14,RPS11,RPS27A,RPS3,RPS23,RPS9,SRP9,ARL6IP1,RPL13,RPL15,RPL38,RPL4,RPS15A,RPLP2,RPS7,RPL7,RPS2,RPS21,RPL3,RPL27A,RPL21,RPS17,RPSA,RPL22,RPS26,RPL12,RPS27,SEC63,RPL5,RPL7A,RPS4X,RPL10A,RPL11,RPS6,RPL24,RPL34,RPL14,RPS8,RPS14,RPL31,UBA52,RPL23A,RPS18,RPL17,RPL9,RPL6,RPL10,RPS24,RPL32,RPL37A,RPL35A,RPL23,SRP19,RPL30,RPS20,RPS25,RPS13,RPL18,RPLP0,R…
GO:1904814	Regulation of protein localization to chromosome, telomeric region	11	15	0.89	9.78e-05	9606.ENSP00000258091,9606.ENSP00000268058,9606.ENSP00000275603,9606.ENSP00000280326,9606.ENSP00000286788,9606.ENSP00000295688,9606.ENSP00000299300,9606.ENSP00000317334,9606.ENSP00000358563,9606.ENSP00000377958,9606.ENSP00000423563	CCT7,PML,CCT6A,CCT5,CCT8,CCT3,CCT2,TCP1,DKC1,CCT4,H2AFY
GO:1904874	Positive regulation of telomerase rna localization to cajal body	11	15	0.89	9.78e-05	9606.ENSP00000258091,9606.ENSP00000275603,9606.ENSP00000280326,9606.ENSP00000286788,9606.ENSP00000295688,9606.ENSP00000299300,9606.ENSP00000317334,9606.ENSP00000318297,9606.ENSP00000358563,9606.ENSP00000377958,9606.ENSP00000473172	CCT7,CCT6A,CCT5,CCT8,CCT3,CCT2,TCP1,RUVBL1,DKC1,CCT4,RUVBL2
GO:0002183	Cytoplasmic translational initiation	20	28	0.88	2.58e-08	9606.ENSP00000216190,9606.ENSP00000216554,9606.ENSP00000220849,9606.ENSP00000248342,9606.ENSP00000253039,9606.ENSP00000253108,9606.ENSP00000261868,9606.ENSP00000293831,9606.ENSP00000332604,9606.ENSP00000354125,9606.ENSP00000358140,9606.ENSP00000360365,9606.ENSP00000362688,9606.ENSP00000364119,9606.ENSP00000386894,9606.ENSP00000416255,9606.ENSP00000429931,9606.ENSP00000431800,9606.ENSP00000436049,…	EIF3D,EIF5,EIF3E,EIF3K,EIF2S3,EIF3G,EIF3J,EIF4A1,EIF3C,EIF3B,EIF3A,MCTS1,EIF3I,EIF2S2,RBM4,EIF4G1,EIF3H,EIF3F,EIF3M,EIF3L
GO:0019081	Viral translation	10	14	0.88	0.00029	9606.ENSP00000216190,9606.ENSP00000253108,9606.ENSP00000349428,9606.ENSP00000352438,9606.ENSP00000354125,9606.ENSP00000358140,9606.ENSP00000360365,9606.ENSP00000386636,9606.ENSP00000431800,9606.ENSP00000485663	EIF3D,EIF3G,PTBP1,PCBP2,EIF3B,EIF3A,MCTS1,SSB,EIF3F,EIF3L
GO:1903608	Protein localization to cytoplasmic stress granule	5	7	0.88	0.0277	9606.ENSP00000356520,9606.ENSP00000361626,9606.ENSP00000370745,9606.ENSP00000382840,9606.ENSP00000386636	DHX9,YBX1,DDX1,DDX3X,SSB
GO:0045047	Protein targeting to er	76	110	0.87	8.1e-31	9606.ENSP00000221566,9606.ENSP00000222247,9606.ENSP00000223641,9606.ENSP00000225430,9606.ENSP00000230050,9606.ENSP00000251453,9606.ENSP00000259469,9606.ENSP00000262213,9606.ENSP00000262584,9606.ENSP00000263672,9606.ENSP00000267884,9606.ENSP00000270625,9606.ENSP00000272317,9606.ENSP00000278572,9606.ENSP00000296674,9606.ENSP00000302896,9606.ENSP00000305230,9606.ENSP00000307889,9606.ENSP00000309334,…	SGTA,RPL18A,SEC61B,RPL19,RPS12,RPS16,RPL35,TRAM1,RPL8,SPCS2,SRP14,RPS11,RPS27A,RPS3,RPS23,RPS9,SRP9,RPL13,RPL15,RPL38,RPL4,RPS15A,RPLP2,CHMP4A,RPS7,RPL7,RPS2,RPS21,RPL3,RPL27A,RPL21,RPS17,RPSA,RPL22,RPS26,RPL12,RPS27,SEC63,RPL5,RPL7A,RPS4X,RPL10A,RPL11,RPS6,RPL24,RPL34,RPL14,RPS8,RPS14,RPL31,UBA52,RPL23A,RPS18,RPL17,RPL9,RPL6,RPL10,RPS24,RPL32,RPL37A,RPL35A,RPL23,SRP19,RPL30,RPS20,RPS25,RPS13,RPL…
GO:0019083	Viral transcription	78	115	0.86	3.01e-31	9606.ENSP00000222247,9606.ENSP00000225430,9606.ENSP00000230050,9606.ENSP00000245544,9606.ENSP00000251453,9606.ENSP00000254508,9606.ENSP00000259469,9606.ENSP00000261396,9606.ENSP00000262584,9606.ENSP00000270625,9606.ENSP00000272317,9606.ENSP00000278572,9606.ENSP00000283195,9606.ENSP00000285968,9606.ENSP00000296674,9606.ENSP00000302896,9606.ENSP00000307889,9606.ENSP00000309334,9606.ENSP00000309830,…	RPL18A,RPL19,RPS12,NUP85,RPS16,NUP210,RPL35,NUP133,RPL8,RPS11,RPS27A,RPS3,RANBP2,NUP205,RPS23,RPS9,RPL13,RPL15,RPL38,NUP93,RPL4,RPS15A,RPLP2,RPS7,RPL7,RPS2,RPS21,RPL3,RPL27A,RPL21,RPS17,RPSA,RPL22,RPS26,RPL12,TPR,DHX9,RPS27,RPL5,RPL7A,RPS4X,RPL10A,RPL11,NUP160,RPS6,SEC13,RPL24,RPL34,RAE1,RPL14,RPS8,RPS14,RPL31,UBA52,RPL23A,RPS18,RPL17,RPL9,RPL6,RPL10,RPS24,RPL32,RPL37A,RPL35A,RPL23,RPL30,RPS20,RP…
GO:0072599	Establishment of protein localization to endoplasmic reticulum	77	114	0.86	9.13e-31	9606.ENSP00000221566,9606.ENSP00000222247,9606.ENSP00000223641,9606.ENSP00000225430,9606.ENSP00000230050,9606.ENSP00000251453,9606.ENSP00000259469,9606.ENSP00000262213,9606.ENSP00000262584,9606.ENSP00000263672,9606.ENSP00000264710,9606.ENSP00000267884,9606.ENSP00000270625,9606.ENSP00000272317,9606.ENSP00000278572,9606.ENSP00000296674,9606.ENSP00000302896,9606.ENSP00000305230,9606.ENSP00000307889,…	SGTA,RPL18A,SEC61B,RPL19,RPS12,RPS16,RPL35,TRAM1,RPL8,SPCS2,RAB10,SRP14,RPS11,RPS27A,RPS3,RPS23,RPS9,SRP9,RPL13,RPL15,RPL38,RPL4,RPS15A,RPLP2,CHMP4A,RPS7,RPL7,RPS2,RPS21,RPL3,RPL27A,RPL21,RPS17,RPSA,RPL22,RPS26,RPL12,RPS27,SEC63,RPL5,RPL7A,RPS4X,RPL10A,RPL11,RPS6,RPL24,RPL34,RPL14,RPS8,RPS14,RPL31,UBA52,RPL23A,RPS18,RPL17,RPL9,RPL6,RPL10,RPS24,RPL32,RPL37A,RPL35A,RPL23,SRP19,RPL30,RPS20,RPS25,RPS…
GO:0002479	Antigen processing and presentation of exogenous peptide antigen via mhc class i, tap-dependent	51	75	0.86	2.14e-20	9606.ENSP00000044462,9606.ENSP00000054666,9606.ENSP00000157812,9606.ENSP00000210313,9606.ENSP00000215071,9606.ENSP00000216455,9606.ENSP00000216802,9606.ENSP00000217958,9606.ENSP00000219313,9606.ENSP00000223321,9606.ENSP00000259457,9606.ENSP00000261023,9606.ENSP00000261303,9606.ENSP00000261479,9606.ENSP00000261712,9606.ENSP00000262193,9606.ENSP00000264639,9606.ENSP00000271308,9606.ENSP00000290541,…	PSMA4,VAMP3,PSMC4,PSMD5,PSMD8,PSMA3,PSME2,PSMD10,PSMD7,PSMA2,PSMB7,ITGAV,PSMC1,PSMA6,PSMD11,PSMB1,PSMD3,PSMA5,PSMB4,PSME3,PDIA3,PSMD1,PSMD2,PSMC5,CALR,PSMF1,TAP1,PSMD12,PSMB10,PSMB5,NCF2,PSMD4,PSMA7,PSMB2,PSMB9,PSMB8,TAP2,HLA-C,PSME1,HLA-A,PSMD14,PSMC2,PSMD13,HLA-B,PSMC6,TAPBP,PSMD6,PSMD9,B2M,PSMC3,PSMB3
GO:0006521	Regulation of cellular amino acid metabolic process	44	64	0.86	1.08e-17	9606.ENSP00000044462,9606.ENSP00000157812,9606.ENSP00000210313,9606.ENSP00000215071,9606.ENSP00000216455,9606.ENSP00000216802,9606.ENSP00000217958,9606.ENSP00000219313,9606.ENSP00000223321,9606.ENSP00000259457,9606.ENSP00000261303,9606.ENSP00000261479,9606.ENSP00000261712,9606.ENSP00000262193,9606.ENSP00000264639,9606.ENSP00000271308,9606.ENSP00000290541,9606.ENSP00000293362,9606.ENSP00000309474,…	PSMA4,PSMC4,PSMD5,PSMD8,PSMA3,PSME2,PSMD10,PSMD7,PSMA2,PSMB7,PSMC1,PSMA6,PSMD11,PSMB1,PSMD3,PSMA5,PSMB4,PSME3,PSMD1,PSMD2,PSMC5,NQO1,PSMF1,PSMD12,ATP2B4,PSMB10,COMT,PSMB5,FH,PSMD4,PSMA7,PSMB2,PSMB9,PSMB8,PSME1,PSMD14,PSMC2,PSMD13,PSMC6,PSMD6,PARK7,PSMD9,PSMC3,PSMB3
GO:0010499	Proteasomal ubiquitin-independent protein catabolic process	15	22	0.86	4.24e-06	9606.ENSP00000044462,9606.ENSP00000216455,9606.ENSP00000223321,9606.ENSP00000259457,9606.ENSP00000261479,9606.ENSP00000262193,9606.ENSP00000271308,9606.ENSP00000290541,9606.ENSP00000351314,9606.ENSP00000355325,9606.ENSP00000359910,9606.ENSP00000362334,9606.ENSP00000363993,9606.ENSP00000364016,9606.ENSP00000483688	PSMA4,PSMA3,PSMA2,PSMB7,PSMA6,PSMB1,PSMA5,PSMB4,PSMB10,PSMB5,PSMA7,PSMB2,PSMB9,PSMB8,PSMB3
GO:0019080	Viral gene expression	88	132	0.85	7.32e-35	9606.ENSP00000216190,9606.ENSP00000222247,9606.ENSP00000225430,9606.ENSP00000230050,9606.ENSP00000245544,9606.ENSP00000251453,9606.ENSP00000253108,9606.ENSP00000254508,9606.ENSP00000259469,9606.ENSP00000261396,9606.ENSP00000262584,9606.ENSP00000270625,9606.ENSP00000272317,9606.ENSP00000278572,9606.ENSP00000283195,9606.ENSP00000285968,9606.ENSP00000296674,9606.ENSP00000302896,9606.ENSP00000307889,…	EIF3D,RPL18A,RPL19,RPS12,NUP85,RPS16,EIF3G,NUP210,RPL35,NUP133,RPL8,RPS11,RPS27A,RPS3,RANBP2,NUP205,RPS23,RPS9,RPL13,RPL15,RPL38,NUP93,RPL4,RPS15A,RPLP2,RPS7,RPL7,RPS2,RPS21,RPL3,RPL27A,RPL21,RPS17,RPSA,RPL22,RPS26,PTBP1,PCBP2,EIF3B,RPL12,TPR,DHX9,RPS27,EIF3A,RPL5,MCTS1,RPL7A,RPS4X,RPL10A,RPL11,NUP160,RPS6,SEC13,RPL24,RPL34,RAE1,RPL14,RPS8,RPS14,SSB,RPL31,UBA52,RPL23A,RPS18,RPL17,RPL9,RPL6,RPL10,…
GO:0000184	Nuclear-transcribed mrna catabolic process, nonsense-mediated decay	79	119	0.85	3.37e-31	9606.ENSP00000220849,9606.ENSP00000222247,9606.ENSP00000225430,9606.ENSP00000230050,9606.ENSP00000251453,9606.ENSP00000259469,9606.ENSP00000262584,9606.ENSP00000269349,9606.ENSP00000270625,9606.ENSP00000272317,9606.ENSP00000278572,9606.ENSP00000296674,9606.ENSP00000302896,9606.ENSP00000307889,9606.ENSP00000309334,9606.ENSP00000309830,9606.ENSP00000311430,9606.ENSP00000313007,9606.ENSP00000318646,…	EIF3E,RPL18A,RPL19,RPS12,RPS16,RPL35,RPL8,EIF4A3,RPS11,RPS27A,RPS3,RPS23,RPS9,RPL13,RPL15,RPL38,RPL4,PABPC1,RPS15A,RPLP2,PPP2R1A,PPP2R2A,RPS7,RPL7,RPS2,RPS21,RPL3,RPL27A,RPL21,RPS17,RPSA,RPL22,RPS26,ETF1,RPL12,RPS27,RPL5,MAGOH,RPL7A,RPS4X,RPL10A,RPL11,NCBP1,RPS6,RPL24,RPL34,RPL14,RPS8,RPS14,RPL31,UBA52,RPL23A,RPS18,RPL17,GSPT1,RPL9,RPL6,RPL10,RPS24,EIF4G1,RPL32,RPL37A,RPL35A,RPL23,RPL30,RPS20,RPS…
GO:0002181	Cytoplasmic translation	48	72	0.85	6.46e-19	9606.ENSP00000216190,9606.ENSP00000216554,9606.ENSP00000220849,9606.ENSP00000222247,9606.ENSP00000225430,9606.ENSP00000225729,9606.ENSP00000248342,9606.ENSP00000253039,9606.ENSP00000253108,9606.ENSP00000261868,9606.ENSP00000262584,9606.ENSP00000293831,9606.ENSP00000296674,9606.ENSP00000309334,9606.ENSP00000309830,9606.ENSP00000329715,9606.ENSP00000332604,9606.ENSP00000345957,9606.ENSP00000346067,…	EIF3D,EIF5,EIF3E,RPL18A,RPL19,DRG2,EIF3K,EIF2S3,EIF3G,EIF3J,RPL8,EIF4A1,RPS23,RPL15,RPL38,DRG1,EIF3C,RPS21,RPSA,RPL22,RPS26,ETF1,EIF3B,EIF3A,MCTS1,EIF3I,RPL10A,RPL11,EIF2S2,RPL24,RPL31,RBM4,RPL17,GSPT1,RPL9,RPL6,EIF4G1,RPL32,RPL35A,RPL30,EIF3H,EIF3F,EIF3M,RPL18,RPLP0,RPL26,RPS28,EIF3L
GO:0002474	Antigen processing and presentation of peptide antigen via mhc class i	62	96	0.84	5.11e-24	9606.ENSP00000044462,9606.ENSP00000054666,9606.ENSP00000157812,9606.ENSP00000210313,9606.ENSP00000215071,9606.ENSP00000216455,9606.ENSP00000216802,9606.ENSP00000217958,9606.ENSP00000219313,9606.ENSP00000223321,9606.ENSP00000247461,9606.ENSP00000259457,9606.ENSP00000261023,9606.ENSP00000261303,9606.ENSP00000261479,9606.ENSP00000261712,9606.ENSP00000262193,9606.ENSP00000264639,9606.ENSP00000265986,…	PSMA4,VAMP3,PSMC4,PSMD5,PSMD8,PSMA3,PSME2,PSMD10,PSMD7,PSMA2,CANX,PSMB7,ITGAV,PSMC1,PSMA6,PSMD11,PSMB1,PSMD3,IDE,PSMA5,PSMB4,PSME3,ERAP1,PDIA3,PSMD1,PSMD2,PSMC5,CALR,PSMF1,SEC24C,TAP1,PSMD12,PSMB10,PSMB5,NCF2,PSMD4,PSMA7,PSMB2,PSMB9,PSMB8,TAP2,HLA-C,PSME1,SEC13,SEC31A,HLA-A,SEC24A,SAR1B,PSMD14,PSMC2,BCAP31,PSMD13,HLA-B,ERAP2,PSMC6,TAPBP,PSMD6,SEC24B,PSMD9,B2M,PSMC3,PSMB3
GO:0048025	Negative regulation of mrna splicing, via spliceosome	15	23	0.84	6.33e-06	9606.ENSP00000221419,9606.ENSP00000225698,9606.ENSP00000229390,9606.ENSP00000244020,9606.ENSP00000262710,9606.ENSP00000307863,9606.ENSP00000325905,9606.ENSP00000346694,9606.ENSP00000349428,9606.ENSP00000359645,9606.ENSP00000365439,9606.ENSP00000414921,9606.ENSP00000420195,9606.ENSP00000457723,9606.ENSP00000481842	HNRNPL,C1QBP,SRSF9,SRSF6,ACIN1,U2AF2,SRSF7,HNRNPA2B1,PTBP1,RBMX,HNRNPK,PTBP3,SRSF10,RNPS1,SAP18
GO:0033119	Negative regulation of rna splicing	17	27	0.83	1.55e-06	9606.ENSP00000221419,9606.ENSP00000225698,9606.ENSP00000229390,9606.ENSP00000244020,9606.ENSP00000262710,9606.ENSP00000307863,9606.ENSP00000325905,9606.ENSP00000346694,9606.ENSP00000348849,9606.ENSP00000349428,9606.ENSP00000359645,9606.ENSP00000365439,9606.ENSP00000414921,9606.ENSP00000420195,9606.ENSP00000435777,9606.ENSP00000457723,9606.ENSP00000481842	HNRNPL,C1QBP,SRSF9,SRSF6,ACIN1,U2AF2,SRSF7,HNRNPA2B1,RPS26,PTBP1,RBMX,HNRNPK,PTBP3,SRSF10,RPS13,RNPS1,SAP18
GO:0006085	acetyl-CoA biosynthetic process	9	14	0.83	0.0012	9606.ENSP00000205402,9606.ENSP00000253382,9606.ENSP00000253792,9606.ENSP00000265838,9606.ENSP00000280346,9606.ENSP00000307241,9606.ENSP00000316924,9606.ENSP00000356820,9606.ENSP00000361642	DLD,ACSS2,ACLY,ACAT1,DLAT,PDHB,ACSS1,MPC2,PPCS
GO:0006957	Complement activation, alternative pathway	8	13	0.82	0.0035	9606.ENSP00000223642,9606.ENSP00000224181,9606.ENSP00000245907,9606.ENSP00000256785,9606.ENSP00000322061,9606.ENSP00000332139,9606.ENSP00000354458,9606.ENSP00000356399	C5,C8G,C3,CFHR5,C7,CFD,C8A,CFH
GO:0006551	Leucine metabolic process	5	8	0.82	0.0395	9606.ENSP00000265594,9606.ENSP00000322991,9606.ENSP00000343657,9606.ENSP00000363614,9606.ENSP00000418397	MCCC1,BCAT2,MCCC2,HMGCL,IVD
GO:0009204	Deoxyribonucleoside triphosphate catabolic process	5	8	0.82	0.0395	9606.ENSP00000262878,9606.ENSP00000322524,9606.ENSP00000369456,9606.ENSP00000370376,9606.ENSP00000422375	SAMHD1,DCTPP1,ITPA,DUT,NUDT16
GO:0035635	Entry of bacterium into host cell	5	8	0.82	0.0395	9606.ENSP00000261769,9606.ENSP00000344456,9606.ENSP00000362680,9606.ENSP00000376345,9606.ENSP00000382004	CDH1,CTNNB1,SRC,GRB2,CTNND1
GO:0046719	Regulation by virus of viral protein levels in host cell	5	8	0.82	0.0395	9606.ENSP00000261875,9606.ENSP00000301764,9606.ENSP00000354394,9606.ENSP00000360922,9606.ENSP00000417175	PTPLAD1,DDB1,STAT1,STAU1,VAPB
GO:0051683	Establishment of golgi localization	5	8	0.82	0.0395	9606.ENSP00000262613,9606.ENSP00000325002,9606.ENSP00000376506,9606.ENSP00000379287,9606.ENSP00000383118	SLC9A3R1,COPG1,PDCD10,YWHAZ,CDC42
GO:0075713	Establishment of integrated proviral latency	5	8	0.82	0.0395	9606.ENSP00000310275,9606.ENSP00000352257,9606.ENSP00000370109,9606.ENSP00000375978,9606.ENSP00000419425	BANF1,XRCC6,PSIP1,XRCC5,PPIA
GO:0110095	Cellular detoxification of aldehyde	5	8	0.82	0.0395	9606.ENSP00000352584,9606.ENSP00000361140,9606.ENSP00000367992,9606.ENSP00000370750,9606.ENSP00000418770	AKR1B10,AKR1A1,ESD,RDH11,PARK7
GO:1903071	Positive regulation of er-associated ubiquitin-dependent protein catabolic process	5	8	0.82	0.0395	9606.ENSP00000221566,9606.ENSP00000339191,9606.ENSP00000345195,9606.ENSP00000365576,9606.ENSP00000392330	SGTA,CAV1,UBQLN2,UBQLN1,BCAP31
GO:0002483	Antigen processing and presentation of endogenous peptide antigen	11	18	0.81	0.00031	9606.ENSP00000265986,9606.ENSP00000292401,9606.ENSP00000296754,9606.ENSP00000346206,9606.ENSP00000364034,9606.ENSP00000365402,9606.ENSP00000379873,9606.ENSP00000399168,9606.ENSP00000400376,9606.ENSP00000404833,9606.ENSP00000452780	IDE,AZGP1,ERAP1,TAP1,TAP2,HLA-C,HLA-A,HLA-B,ERAP2,TAPBP,B2M
GO:0009083	Branched-chain amino acid catabolic process	13	22	0.8	7.68e-05	9606.ENSP00000168216,9606.ENSP00000205402,9606.ENSP00000265395,9606.ENSP00000265594,9606.ENSP00000265838,9606.ENSP00000322991,9606.ENSP00000343657,9606.ENSP00000352706,9606.ENSP00000357873,9606.ENSP00000359151,9606.ENSP00000363614,9606.ENSP00000418397,9606.ENSP00000450436	HSD17B10,DLD,HIBADH,MCCC1,ACAT1,BCAT2,MCCC2,HIBCH,ACADSB,DBT,HMGCL,IVD,ALDH6A1
GO:0046112	Nucleobase biosynthetic process	12	20	0.8	0.00015	9606.ENSP00000216605,9606.ENSP00000232607,9606.ENSP00000264705,9606.ENSP00000298556,9606.ENSP00000313490,9606.ENSP00000318868,9606.ENSP00000360939,9606.ENSP00000361512,9606.ENSP00000367615,9606.ENSP00000382595,9606.ENSP00000419851,9606.ENSP00000478253	MTHFD1,UMPS,CAD,HPRT1,PFAS,SHMT1,CMPK1,PRPS1,APRT,PAICS,GMPS,MTHFD1L
GO:0034975	Protein folding in endoplasmic reticulum	6	10	0.8	0.0196	9606.ENSP00000247461,9606.ENSP00000299767,9606.ENSP00000300289,9606.ENSP00000320866,9606.ENSP00000379042,9606.ENSP00000473631	CANX,HSP90B1,PDIA3,CALR,ERO1L,DNAJC3
GO:0045899	Positive regulation of rna polymerase ii transcription preinitiation complex assembly	6	10	0.8	0.0196	9606.ENSP00000157812,9606.ENSP00000310572,9606.ENSP00000391211,9606.ENSP00000401802,9606.ENSP00000442318,9606.ENSP00000481029	PSMC4,PSMC5,PSMC2,PSMC6,CAND1,PSMC3
GO:0110096	Cellular response to aldehyde	6	10	0.8	0.0196	9606.ENSP00000287295,9606.ENSP00000352584,9606.ENSP00000361140,9606.ENSP00000367992,9606.ENSP00000370750,9606.ENSP00000418770	AIFM1,AKR1B10,AKR1A1,ESD,RDH11,PARK7
GO:1903069	Regulation of er-associated ubiquitin-dependent protein catabolic process	6	10	0.8	0.0196	9606.ENSP00000221566,9606.ENSP00000261601,9606.ENSP00000339191,9606.ENSP00000345195,9606.ENSP00000365576,9606.ENSP00000392330	SGTA,USP14,CAV1,UBQLN2,UBQLN1,BCAP31
GO:0009168	Purine ribonucleoside monophosphate biosynthetic process	11	19	0.79	0.00043	9606.ENSP00000236959,9606.ENSP00000286621,9606.ENSP00000298556,9606.ENSP00000313490,9606.ENSP00000321584,9606.ENSP00000355493,9606.ENSP00000357835,9606.ENSP00000367615,9606.ENSP00000382595,9606.ENSP00000419851,9606.ENSP00000485525	ATIC,ADK,HPRT1,PFAS,IMPDH2,ADSS,LHPP,APRT,PAICS,GMPS,ADSL
GO:0070972	Protein localization to endoplasmic reticulum	79	140	0.78	1.02e-27	9606.ENSP00000221566,9606.ENSP00000222247,9606.ENSP00000223641,9606.ENSP00000225430,9606.ENSP00000230050,9606.ENSP00000251453,9606.ENSP00000259469,9606.ENSP00000262213,9606.ENSP00000262584,9606.ENSP00000263672,9606.ENSP00000264710,9606.ENSP00000267884,9606.ENSP00000270625,9606.ENSP00000272317,9606.ENSP00000278572,9606.ENSP00000296674,9606.ENSP00000302896,9606.ENSP00000305230,9606.ENSP00000307889,…	SGTA,RPL18A,SEC61B,RPL19,RPS12,RPS16,RPL35,TRAM1,RPL8,SPCS2,RAB10,SRP14,RPS11,RPS27A,RPS3,RPS23,RPS9,SRP9,RPL13,RPL15,RPL38,RPL4,RPS15A,RPLP2,CHMP4A,RPS7,RPL7,RPS2,VAPA,RPS21,RPL3,RPL27A,RPL21,RPS17,RPSA,RPL22,RPS26,RPL12,RPS27,SEC63,RPL5,RPL7A,RPS4X,RPL10A,RPL11,RPS6,RPL24,RPL34,RPL14,RPS8,RPS14,RPL31,UBA52,RPL23A,BCAP31,RPS18,RPL17,RPL9,RPL6,RPL10,RPS24,RPL32,RPL37A,RPL35A,RPL23,SRP19,RPL30,RPS…
GO:0033238	Regulation of cellular amine metabolic process	46	82	0.78	5.7e-16	9606.ENSP00000044462,9606.ENSP00000157812,9606.ENSP00000210313,9606.ENSP00000215071,9606.ENSP00000216455,9606.ENSP00000216802,9606.ENSP00000217958,9606.ENSP00000219313,9606.ENSP00000223321,9606.ENSP00000259457,9606.ENSP00000261303,9606.ENSP00000261479,9606.ENSP00000261712,9606.ENSP00000262193,9606.ENSP00000264639,9606.ENSP00000271308,9606.ENSP00000290541,9606.ENSP00000293362,9606.ENSP00000298556,…	PSMA4,PSMC4,PSMD5,PSMD8,PSMA3,PSME2,PSMD10,PSMD7,PSMA2,PSMB7,PSMC1,PSMA6,PSMD11,PSMB1,PSMD3,PSMA5,PSMB4,PSME3,HPRT1,VPS35,PSMD1,PSMD2,PSMC5,NQO1,PSMF1,PSMD12,ATP2B4,PSMB10,COMT,PSMB5,FH,PSMD4,PSMA7,PSMB2,PSMB9,PSMB8,PSME1,PSMD14,PSMC2,PSMD13,PSMC6,PSMD6,PARK7,PSMD9,PSMC3,PSMB3
GO:1902036	Regulation of hematopoietic stem cell differentiation	42	74	0.78	1.05e-14	9606.ENSP00000044462,9606.ENSP00000157812,9606.ENSP00000210313,9606.ENSP00000215071,9606.ENSP00000216455,9606.ENSP00000216802,9606.ENSP00000217958,9606.ENSP00000219313,9606.ENSP00000223321,9606.ENSP00000259457,9606.ENSP00000261303,9606.ENSP00000261479,9606.ENSP00000261712,9606.ENSP00000262193,9606.ENSP00000264639,9606.ENSP00000271308,9606.ENSP00000290541,9606.ENSP00000293362,9606.ENSP00000297185,…	PSMA4,PSMC4,PSMD5,PSMD8,PSMA3,PSME2,PSMD10,PSMD7,PSMA2,PSMB7,PSMC1,PSMA6,PSMD11,PSMB1,PSMD3,PSMA5,PSMB4,PSME3,HSPA9,PSMD1,PSMD2,PSMC5,PRKDC,PSMF1,PSMD12,PUS7,PSMB10,PSMB5,PSMD4,PSMA7,PSMB2,PSMB9,PSMB8,PSME1,PSMD14,PSMC2,PSMD13,PSMC6,PSMD6,PSMD9,PSMC3,PSMB3
GO:0006418	tRNA aminoacylation for protein translation	26	46	0.78	3.81e-09	9606.ENSP00000223029,9606.ENSP00000234677,9606.ENSP00000256854,9606.ENSP00000261772,9606.ENSP00000262027,9606.ENSP00000264161,9606.ENSP00000281828,9606.ENSP00000307567,9606.ENSP00000320309,9606.ENSP00000325448,9606.ENSP00000343885,9606.ENSP00000347495,9606.ENSP00000355086,9606.ENSP00000355889,9606.ENSP00000355890,9606.ENSP00000362329,9606.ENSP00000362576,9606.ENSP00000364794,9606.ENSP00000364815,…	AIMP2,SARS,NARS,AARS,MARS,DARS,FARSB,QARS,FARSA,KARS,PPA2,WARS,DARS2,IARS2,EPRS,PPA1,YARS,IARS,VARS,EEF1E1,CARS,GARS,AIMP1,TARS,HARS,SARS2
GO:0000715	Nucleotide-excision repair, dna damage recognition	13	23	0.78	0.00011	9606.ENSP00000264389,9606.ENSP00000268717,9606.ENSP00000272317,9606.ENSP00000299259,9606.ENSP00000301764,9606.ENSP00000304102,9606.ENSP00000346340,9606.ENSP00000350512,9606.ENSP00000350708,9606.ENSP00000355759,9606.ENSP00000362710,9606.ENSP00000376167,9606.ENSP00000388107	COPS4,COPS3,RPS27A,COPS2,DDB1,COPS6,COPS8,COPS5,RAD23B,PARP1,COPS7B,GPS1,UBA52
GO:0009084	Glutamine family amino acid biosynthetic process	9	16	0.78	0.0024	9606.ENSP00000220966,9606.ENSP00000277865,9606.ENSP00000317379,9606.ENSP00000342502,9606.ENSP00000357838,9606.ENSP00000360268,9606.ENSP00000361471,9606.ENSP00000384949,9606.ENSP00000388658	PYCRL,GLUD1,GLS,PYCR2,OAT,ALDH18A1,ASS1,PYCR1,SLC25A12
GO:0043248	Proteasome assembly	8	14	0.78	0.0048	9606.ENSP00000210313,9606.ENSP00000217958,9606.ENSP00000259335,9606.ENSP00000261712,9606.ENSP00000357879,9606.ENSP00000396937,9606.ENSP00000440485,9606.ENSP00000478877	PSMD5,PSMD10,KIAA0368,PSMD11,PSMD4,PSMD13,PSMD9,ADRM1
GO:0061418	Regulation of transcription from rna polymerase ii promoter in response to hypoxia	43	78	0.77	1.02e-14	9606.ENSP00000044462,9606.ENSP00000157812,9606.ENSP00000210313,9606.ENSP00000215071,9606.ENSP00000216455,9606.ENSP00000216802,9606.ENSP00000217958,9606.ENSP00000219313,9606.ENSP00000223321,9606.ENSP00000259457,9606.ENSP00000261303,9606.ENSP00000261479,9606.ENSP00000261712,9606.ENSP00000262193,9606.ENSP00000262306,9606.ENSP00000264639,9606.ENSP00000271308,9606.ENSP00000272317,9606.ENSP00000290541,…	PSMA4,PSMC4,PSMD5,PSMD8,PSMA3,PSME2,PSMD10,PSMD7,PSMA2,PSMB7,PSMC1,PSMA6,PSMD11,PSMB1,TCEB2,PSMD3,PSMA5,RPS27A,PSMB4,PSME3,PSMD1,PSMD2,PSMC5,PSMF1,PSMD12,PSMB10,PSMB5,PSMD4,PSMA7,PSMB2,PSMB9,PSMB8,PSME1,PSMD14,UBA52,PSMC2,PSMD13,PSMC6,PSMD6,PSMD9,TCEB1,PSMC3,PSMB3
GO:0006099	Tricarboxylic acid cycle	19	34	0.77	1.1e-06	9606.ENSP00000205402,9606.ENSP00000216254,9606.ENSP00000217901,9606.ENSP00000264932,9606.ENSP00000280346,9606.ENSP00000299518,9606.ENSP00000307241,9606.ENSP00000309477,9606.ENSP00000321070,9606.ENSP00000327070,9606.ENSP00000331897,9606.ENSP00000342056,9606.ENSP00000355518,9606.ENSP00000364649,9606.ENSP00000367923,9606.ENSP00000370223,9606.ENSP00000372112,9606.ENSP00000390265,9606.ENSP00000419325	DLD,ACO2,IDH3G,SDHA,DLAT,IDH3A,PDHB,ACO1,ME2,MDH2,IDH2,CS,FH,SDHB,SUCLA2,IDH3B,FAHD1,IDH1,SUCLG2
GO:0000028	Ribosomal small subunit assembly	10	18	0.77	0.0012	9606.ENSP00000245539,9606.ENSP00000309830,9606.ENSP00000313420,9606.ENSP00000346067,9606.ENSP00000357555,9606.ENSP00000375978,9606.ENSP00000385958,9606.ENSP00000470972,9606.ENSP00000472469,9606.ENSP00000472985	MRPS7,RPL38,PRKDC,RPSA,RPS27,XRCC5,RPS14,RPS19,RPS28,RPS5
GO:0048026	Positive regulation of mrna splicing, via spliceosome	12	22	0.76	0.0003	9606.ENSP00000227524,9606.ENSP00000233078,9606.ENSP00000261531,9606.ENSP00000297071,9606.ENSP00000318195,9606.ENSP00000342026,9606.ENSP00000346634,9606.ENSP00000359645,9606.ENSP00000364289,9606.ENSP00000365950,9606.ENSP00000416959,9606.ENSP00000432083	PRPF19,DAZAP1,SNW1,TRA2A,NCL,PRDX6,THRAP3,RBMX,NCBP1,RBM3,TRA2B,HSPA8
GO:0000244	Spliceosomal tri-snrnp complex assembly	7	13	0.76	0.0134	9606.ENSP00000227524,9606.ENSP00000228284,9606.ENSP00000266079,9606.ENSP00000324122,9606.ENSP00000364813,9606.ENSP00000420195,9606.ENSP00000460348	PRPF19,SART3,PRPF6,PRPF31,LSM2,SRSF10,PRPF8
GO:0046040	IMP metabolic process	7	13	0.76	0.0134	9606.ENSP00000236959,9606.ENSP00000298556,9606.ENSP00000313490,9606.ENSP00000339479,9606.ENSP00000355493,9606.ENSP00000382595,9606.ENSP00000485525	ATIC,HPRT1,PFAS,NT5C2,ADSS,PAICS,ADSL
GO:0090110	COPII-coated vesicle cargo loading	7	13	0.76	0.0134	9606.ENSP00000338844,9606.ENSP00000343405,9606.ENSP00000373312,9606.ENSP00000378721,9606.ENSP00000381823,9606.ENSP00000387286,9606.ENSP00000428564	SEC23B,SEC24C,SEC13,SEC31A,SEC24A,RAB1A,SEC24B
GO:0006560	Proline metabolic process	6	11	0.76	0.0271	9606.ENSP00000220966,9606.ENSP00000342502,9606.ENSP00000357838,9606.ENSP00000360268,9606.ENSP00000364490,9606.ENSP00000384949	PYCRL,PYCR2,OAT,ALDH18A1,ALDH4A1,PYCR1
GO:0006907	Pinocytosis	6	11	0.76	0.0271	9606.ENSP00000220325,9606.ENSP00000247470,9606.ENSP00000366998,9606.ENSP00000373905,9606.ENSP00000393887,9606.ENSP00000394863	EHD4,PYCARD,SNX5,DNM2,AHSG,PPT1
GO:0010988	Regulation of low-density lipoprotein particle clearance	6	11	0.76	0.0271	9606.ENSP00000220003,9606.ENSP00000227667,9606.ENSP00000273308,9606.ENSP00000346032,9606.ENSP00000365439,9606.ENSP00000381216	CSK,APOC3,CNPY2,ANXA2,HNRNPK,KHSRP
GO:0042776	Mitochondrial atp synthesis coupled proton transport	11	21	0.75	0.00081	9606.ENSP00000215375,9606.ENSP00000262030,9606.ENSP00000290299,9606.ENSP00000300688,9606.ENSP00000301587,9606.ENSP00000317159,9606.ENSP00000348886,9606.ENSP00000349142,9606.ENSP00000358737,9606.ENSP00000381736,9606.ENSP00000389649	ATP5D,ATP5B,ATP5O,ATP5L,ATP5H,CYC1,STOML2,ATP5C1,ATP5F1,ATP5A1,ATP5J
GO:0051290	Protein heterotetramerization	8	15	0.75	0.0066	9606.ENSP00000266679,9606.ENSP00000281828,9606.ENSP00000300291,9606.ENSP00000300738,9606.ENSP00000303525,9606.ENSP00000320309,9606.ENSP00000345412,9606.ENSP00000353770	CPSF6,FARSB,NUDT21,RRM1,CBR4,FARSA,CPSF7,RRM2
GO:0031145	Anaphase-promoting complex-dependent catabolic process	43	83	0.74	5.18e-14	9606.ENSP00000044462,9606.ENSP00000157812,9606.ENSP00000210313,9606.ENSP00000215071,9606.ENSP00000216455,9606.ENSP00000216802,9606.ENSP00000217958,9606.ENSP00000219313,9606.ENSP00000223321,9606.ENSP00000259457,9606.ENSP00000261303,9606.ENSP00000261479,9606.ENSP00000261712,9606.ENSP00000262193,9606.ENSP00000264639,9606.ENSP00000271308,9606.ENSP00000272317,9606.ENSP00000290541,9606.ENSP00000293362,…	PSMA4,PSMC4,PSMD5,PSMD8,PSMA3,PSME2,PSMD10,PSMD7,PSMA2,PSMB7,PSMC1,PSMA6,PSMD11,PSMB1,PSMD3,PSMA5,RPS27A,PSMB4,PSME3,PSMD1,PSMD2,PSMC5,PSMF1,PSMD12,PSMB10,PSMB5,BUB3,PSMD4,PSMA7,PSMB2,PSMB9,PSMB8,PSME1,CDK1,PSMD14,UBA52,PSMC2,PSMD13,PSMC6,PSMD6,PSMD9,PSMC3,PSMB3
GO:0038061	NIK/NF-kappaB signaling	41	81	0.73	4e-13	9606.ENSP00000044462,9606.ENSP00000157812,9606.ENSP00000210313,9606.ENSP00000215071,9606.ENSP00000216455,9606.ENSP00000216802,9606.ENSP00000217958,9606.ENSP00000219313,9606.ENSP00000223321,9606.ENSP00000226574,9606.ENSP00000259457,9606.ENSP00000261303,9606.ENSP00000261479,9606.ENSP00000261712,9606.ENSP00000262193,9606.ENSP00000264639,9606.ENSP00000271308,9606.ENSP00000290541,9606.ENSP00000293362,…	PSMA4,PSMC4,PSMD5,PSMD8,PSMA3,PSME2,PSMD10,PSMD7,PSMA2,NFKB1,PSMB7,PSMC1,PSMA6,PSMD11,PSMB1,PSMD3,PSMA5,PSMB4,PSME3,PSMD1,PSMD2,PSMC5,PSMF1,COPS8,PSMD12,PSMB10,PSMB5,PSMD4,PSMA7,PSMB2,PSMB9,PSMB8,PSME1,PSMD14,PSMC2,PSMD13,PSMC6,PSMD6,PSMD9,PSMC3,PSMB3
GO:0034063	Stress granule assembly	10	20	0.73	0.0022	9606.ENSP00000256383,9606.ENSP00000296674,9606.ENSP00000343629,9606.ENSP00000352738,9606.ENSP00000377681,9606.ENSP00000378917,9606.ENSP00000382840,9606.ENSP00000389445,9606.ENSP00000478754,9606.ENSP00000481762	EIF2S1,RPS23,PRRC2C,G3BP2,G3BP1,ATXN2L,DDX3X,UBAP2L,DDX6,CSDE1
GO:0051016	Barbed-end actin filament capping	9	18	0.73	0.0044	9606.ENSP00000248444,9606.ENSP00000263168,9606.ENSP00000263867,9606.ENSP00000264758,9606.ENSP00000303908,9606.ENSP00000348381,9606.ENSP00000362924,9606.ENSP00000401010,9606.ENSP00000449428	VIL1,CAPZA1,CAPG,ADD1,TWF2,ADD3,GSN,CAPZB,TWF1
GO:0036010	Protein localization to endosome	7	14	0.73	0.018	9606.ENSP00000229340,9606.ENSP00000263246,9606.ENSP00000282633,9606.ENSP00000298316,9606.ENSP00000299138,9606.ENSP00000314733,9606.ENSP00000349486	RAB35,PACSIN2,FAM21A,ARF6,VPS35,TOLLIP,SCRIB
GO:0045898	Regulation of rna polymerase ii transcription preinitiation complex assembly	7	14	0.73	0.018	9606.ENSP00000157812,9606.ENSP00000310572,9606.ENSP00000345347,9606.ENSP00000391211,9606.ENSP00000401802,9606.ENSP00000442318,9606.ENSP00000481029	PSMC4,PSMC5,HMGB1,PSMC2,PSMC6,CAND1,PSMC3
GO:0046033	AMP metabolic process	7	14	0.73	0.018	9606.ENSP00000286621,9606.ENSP00000346921,9606.ENSP00000355493,9606.ENSP00000362271,9606.ENSP00000367615,9606.ENSP00000371230,9606.ENSP00000485525	ADK,AK2,ADSS,AK1,APRT,AK3,ADSL
GO:0019042	Viral latency	6	12	0.73	0.0361	9606.ENSP00000309555,9606.ENSP00000310275,9606.ENSP00000352257,9606.ENSP00000370109,9606.ENSP00000375978,9606.ENSP00000419425	HCFC1,BANF1,XRCC6,PSIP1,XRCC5,PPIA
GO:0042340	Keratan sulfate catabolic process	6	12	0.73	0.0361	9606.ENSP00000261416,9606.ENSP00000266718,9606.ENSP00000268097,9606.ENSP00000306920,9606.ENSP00000343924,9606.ENSP00000347041	HEXB,LUM,HEXA,GLB1,PRELP,FMOD
GO:1901532	Regulation of hematopoietic progenitor cell differentiation	43	87	0.72	1.78e-13	9606.ENSP00000044462,9606.ENSP00000157812,9606.ENSP00000210313,9606.ENSP00000215071,9606.ENSP00000216455,9606.ENSP00000216802,9606.ENSP00000217958,9606.ENSP00000219313,9606.ENSP00000223321,9606.ENSP00000259457,9606.ENSP00000261303,9606.ENSP00000261479,9606.ENSP00000261712,9606.ENSP00000262193,9606.ENSP00000264639,9606.ENSP00000271308,9606.ENSP00000290541,9606.ENSP00000293362,9606.ENSP00000297185,…	PSMA4,PSMC4,PSMD5,PSMD8,PSMA3,PSME2,PSMD10,PSMD7,PSMA2,PSMB7,PSMC1,PSMA6,PSMD11,PSMB1,PSMD3,PSMA5,PSMB4,PSME3,HSPA9,NUDT21,PSMD1,PSMD2,PSMC5,PRKDC,PSMF1,PSMD12,PUS7,PSMB10,PSMB5,PSMD4,PSMA7,PSMB2,PSMB9,PSMB8,PSME1,PSMD14,PSMC2,PSMD13,PSMC6,PSMD6,PSMD9,PSMC3,PSMB3
GO:0071349	Cellular response to interleukin-12	24	49	0.72	1.48e-07	9606.ENSP00000005257,9606.ENSP00000215754,9606.ENSP00000216802,9606.ENSP00000254193,9606.ENSP00000261366,9606.ENSP00000263168,9606.ENSP00000270142,9606.ENSP00000280154,9606.ENSP00000297185,9606.ENSP00000306752,9606.ENSP00000314067,9606.ENSP00000317334,9606.ENSP00000321259,9606.ENSP00000346032,9606.ENSP00000346694,9606.ENSP00000353408,9606.ENSP00000355361,9606.ENSP00000358727,9606.ENSP00000383118,…	RALA,MIF,PSME2,SNRPA1,LMNB1,CAPZA1,SOD1,PDCD4,HSPA9,BOLA2B,PAK2,TCP1,TALDO1,ANXA2,HNRNPA2B1,MSN,CD47,GSTO1,CDC42,HNRNPF,PPIA,CFL1,RPLP0,HNRNPDL
GO:0035722	interleukin-12-mediated signaling pathway	23	47	0.72	3e-07	9606.ENSP00000005257,9606.ENSP00000215754,9606.ENSP00000216802,9606.ENSP00000254193,9606.ENSP00000261366,9606.ENSP00000263168,9606.ENSP00000270142,9606.ENSP00000280154,9606.ENSP00000297185,9606.ENSP00000306752,9606.ENSP00000314067,9606.ENSP00000317334,9606.ENSP00000321259,9606.ENSP00000346032,9606.ENSP00000346694,9606.ENSP00000353408,9606.ENSP00000358727,9606.ENSP00000383118,9606.ENSP00000400433,…	RALA,MIF,PSME2,SNRPA1,LMNB1,CAPZA1,SOD1,PDCD4,HSPA9,BOLA2B,PAK2,TCP1,TALDO1,ANXA2,HNRNPA2B1,MSN,GSTO1,CDC42,HNRNPF,PPIA,CFL1,RPLP0,HNRNPDL
GO:0000956	Nuclear-transcribed mrna catabolic process	94	194	0.71	3.73e-29	9606.ENSP00000220849,9606.ENSP00000222247,9606.ENSP00000225430,9606.ENSP00000230050,9606.ENSP00000251453,9606.ENSP00000252622,9606.ENSP00000259469,9606.ENSP00000262584,9606.ENSP00000263579,9606.ENSP00000267973,9606.ENSP00000269349,9606.ENSP00000270625,9606.ENSP00000272317,9606.ENSP00000278572,9606.ENSP00000296674,9606.ENSP00000302896,9606.ENSP00000307889,9606.ENSP00000309142,9606.ENSP00000309334,…	EIF3E,RPL18A,RPL19,RPS12,RPS16,LSM7,RPL35,RPL8,DCPS,WDR61,EIF4A3,RPS11,RPS27A,RPS3,RPS23,RPS9,RPL13,PDE12,RPL15,RPL38,RPL4,PABPC1,RPS15A,CNOT1,RPLP2,PPP2R1A,PPP2R2A,RPS7,RPL7,RPS2,RPS21,RPL3,RPL27A,RPL21,RPS17,RPSA,RPL22,THRAP3,RPS26,EDC4,ETF1,RPL12,RPS27,RPL5,MAGOH,RPL7A,RPS4X,RPL10A,RPL11,NCBP1,LSM2,XRN2,DIS3,RPS6,RPL24,RPL34,RPL14,RPS8,RPS14,SSB,RPL31,UBA52,RPL23A,RPS18,RPL17,GSPT1,RPL9,RPL6,R…
GO:0060071	Wnt signaling pathway, planar cell polarity pathway	46	96	0.71	5.06e-14	9606.ENSP00000044462,9606.ENSP00000157812,9606.ENSP00000210313,9606.ENSP00000215071,9606.ENSP00000216455,9606.ENSP00000216802,9606.ENSP00000217958,9606.ENSP00000219313,9606.ENSP00000223321,9606.ENSP00000259457,9606.ENSP00000261303,9606.ENSP00000261479,9606.ENSP00000261712,9606.ENSP00000262193,9606.ENSP00000264639,9606.ENSP00000271308,9606.ENSP00000290541,9606.ENSP00000292807,9606.ENSP00000293362,…	PSMA4,PSMC4,PSMD5,PSMD8,PSMA3,PSME2,PSMD10,PSMD7,PSMA2,PSMB7,PSMC1,PSMA6,PSMD11,PSMB1,PSMD3,PSMA5,PSMB4,AP2M1,PSME3,PSMD1,PSMD2,PSMC5,AP2A2,PSMF1,PSMD12,RAC1,PSMB10,PSMB5,PSMD4,PSMA7,PSMB2,PSMB9,PSMB8,PSME1,CDC42,PSMD14,PSMC2,PSMD13,RHOA,PSMC6,PSMD6,PSMD9,CLTC,PSMC3,AP2B1,PSMB3
GO:0070498	interleukin-1-mediated signaling pathway	46	96	0.71	5.06e-14	9606.ENSP00000044462,9606.ENSP00000157812,9606.ENSP00000210313,9606.ENSP00000215071,9606.ENSP00000216455,9606.ENSP00000216802,9606.ENSP00000217958,9606.ENSP00000219313,9606.ENSP00000223321,9606.ENSP00000226574,9606.ENSP00000259457,9606.ENSP00000261303,9606.ENSP00000261479,9606.ENSP00000261712,9606.ENSP00000262193,9606.ENSP00000263025,9606.ENSP00000264639,9606.ENSP00000271308,9606.ENSP00000272317,…	PSMA4,PSMC4,PSMD5,PSMD8,PSMA3,PSME2,PSMD10,PSMD7,PSMA2,NFKB1,PSMB7,PSMC1,PSMA6,PSMD11,PSMB1,MAPK3,PSMD3,PSMA5,RPS27A,PSMB4,PSME3,PSMD1,PSMD2,PSMC5,TOLLIP,UBE2N,PSMF1,PSMD12,PSMB10,PSMB5,PSMD4,PSMA7,PSMB2,PSMB9,PSMB8,PSME1,SQSTM1,PSMD14,UBA52,PSMC2,PSMD13,PSMC6,PSMD6,PSMD9,PSMC3,PSMB3
GO:0010972	Negative regulation of g2/m transition of mitotic cell cycle	44	92	0.71	2.09e-13	9606.ENSP00000044462,9606.ENSP00000157812,9606.ENSP00000210313,9606.ENSP00000215071,9606.ENSP00000216455,9606.ENSP00000216802,9606.ENSP00000217958,9606.ENSP00000219313,9606.ENSP00000223321,9606.ENSP00000259457,9606.ENSP00000261303,9606.ENSP00000261479,9606.ENSP00000261712,9606.ENSP00000262193,9606.ENSP00000264639,9606.ENSP00000271308,9606.ENSP00000290541,9606.ENSP00000293362,9606.ENSP00000297338,…	PSMA4,PSMC4,PSMD5,PSMD8,PSMA3,PSME2,PSMD10,PSMD7,PSMA2,PSMB7,PSMC1,PSMA6,PSMD11,PSMB1,PSMD3,PSMA5,PSMB4,PSME3,RAD21,PSMD1,PSMD2,PSMC5,MRE11A,PSMF1,PSMD12,PSMB10,PSMB5,PSMD4,PSMA7,PSMB2,PSMB9,PSMB8,PSME1,FHL1,CDK1,PSMD14,PSMC2,PSMD13,PSMC6,PSMD6,CDK5RAP3,PSMD9,PSMC3,PSMB3
GO:0045070	Positive regulation of viral genome replication	18	37	0.71	1.09e-05	9606.ENSP00000261875,9606.ENSP00000286713,9606.ENSP00000301764,9606.ENSP00000303754,9606.ENSP00000306614,9606.ENSP00000309142,9606.ENSP00000313007,9606.ENSP00000336721,9606.ENSP00000345656,9606.ENSP00000357459,9606.ENSP00000360922,9606.ENSP00000362931,9606.ENSP00000382840,9606.ENSP00000396704,9606.ENSP00000411532,9606.ENSP00000417175,9606.ENSP00000419425,9606.ENSP00000432083	PTPLAD1,STOM,DDB1,PPID,PPIH,PDE12,PABPC1,LARP1,VAPA,ADAR,STAU1,SRPK1,DDX3X,TOP2B,TOP2A,VAPB,PPIA,HSPA8
GO:0009156	Ribonucleoside monophosphate biosynthetic process	16	33	0.71	4.41e-05	9606.ENSP00000232607,9606.ENSP00000236959,9606.ENSP00000264705,9606.ENSP00000286621,9606.ENSP00000298556,9606.ENSP00000313490,9606.ENSP00000321584,9606.ENSP00000355493,9606.ENSP00000357835,9606.ENSP00000360939,9606.ENSP00000361512,9606.ENSP00000367615,9606.ENSP00000381504,9606.ENSP00000382595,9606.ENSP00000419851,9606.ENSP00000485525	UMPS,ATIC,CAD,ADK,HPRT1,PFAS,IMPDH2,ADSS,LHPP,CMPK1,PRPS1,APRT,PRPS2,PAICS,GMPS,ADSL
GO:0051693	Actin filament capping	16	33	0.71	4.41e-05	9606.ENSP00000248444,9606.ENSP00000259365,9606.ENSP00000263168,9606.ENSP00000263867,9606.ENSP00000264758,9606.ENSP00000303908,9606.ENSP00000308753,9606.ENSP00000348381,9606.ENSP00000349259,9606.ENSP00000356257,9606.ENSP00000357129,9606.ENSP00000361824,9606.ENSP00000362924,9606.ENSP00000401010,9606.ENSP00000449428,9606.ENSP00000451752	VIL1,TMOD1,CAPZA1,CAPG,ADD1,TWF2,TMOD3,ADD3,SPTBN1,LMOD1,SPTA1,SPTAN1,GSN,CAPZB,TWF1,SPTB
GO:0071711	Basement membrane organization	12	25	0.71	0.00072	9606.ENSP00000216286,9606.ENSP00000217289,9606.ENSP00000222399,9606.ENSP00000223127,9606.ENSP00000250378,9606.ENSP00000264187,9606.ENSP00000325941,9606.ENSP00000339191,9606.ENSP00000357981,9606.ENSP00000364979,9606.ENSP00000379350,9606.ENSP00000388325	NID2,FERMT1,LAMB1,PLOD3,CMA1,NID1,RIC8A,CAV1,CTSS,COL4A1,ITGB1,LAMB2
GO:0043488	Regulation of mrna stability	87	183	0.7	1.56e-26	9606.ENSP00000044462,9606.ENSP00000157812,9606.ENSP00000210313,9606.ENSP00000215071,9606.ENSP00000216455,9606.ENSP00000216714,9606.ENSP00000216802,9606.ENSP00000217958,9606.ENSP00000219313,9606.ENSP00000223321,9606.ENSP00000228251,9606.ENSP00000229795,9606.ENSP00000240185,9606.ENSP00000254108,9606.ENSP00000254878,9606.ENSP00000258770,9606.ENSP00000259457,9606.ENSP00000261303,9606.ENSP00000261479,…	PSMA4,PSMC4,PSMD5,PSMD8,PSMA3,APEX1,PSME2,PSMD10,PSMD7,PSMA2,YBX3,MAPK14,TARDBP,FUS,HRSP12,TBRG4,PSMB7,PSMC1,PSMA6,PSMD11,PSMB1,PSMD3,PSMA5,RPS27A,HNRNPU,PSMB4,PSME3,NPM1,PAIP1,PDE12,PSMD1,PSMD2,PSMC5,PABPC1,HNRNPD,HNRNPA0,ROCK2,HNRNPM,TNPO1,LARP1,PSMF1,THRAP3,PSMD12,FXR1,PSMB10,PSMB5,DHX9,PSMD4,SYNCRIP,FMR1,PSMA7,SERBP1,YBX1,SET,YWHAB,PABPC4,PSMB2,HNRNPR,PSMB9,PSMB8,DIS3,IGF2BP2,PSME1,YWHAZ,CARH…
GO:0002478	Antigen processing and presentation of exogenous peptide antigen	82	174	0.7	8.14e-25	9606.ENSP00000044462,9606.ENSP00000054666,9606.ENSP00000157812,9606.ENSP00000210313,9606.ENSP00000215071,9606.ENSP00000216455,9606.ENSP00000216802,9606.ENSP00000217958,9606.ENSP00000219313,9606.ENSP00000223321,9606.ENSP00000236671,9606.ENSP00000247461,9606.ENSP00000250244,9606.ENSP00000258198,9606.ENSP00000259457,9606.ENSP00000261023,9606.ENSP00000261303,9606.ENSP00000261479,9606.ENSP00000261712,…	PSMA4,VAMP3,PSMC4,PSMD5,PSMD8,PSMA3,PSME2,PSMD10,PSMD7,PSMA2,CTSD,CANX,AP1M2,DYNC1LI2,PSMB7,ITGAV,PSMC1,PSMA6,PSMD11,PSMB1,CAPZA1,PSMD3,RAB7A,PSMA5,DYNC1LI1,PSMB4,AP2M1,PSME3,PDIA3,PSMD1,PSMD2,PSMC5,CALR,AP2A2,PSMF1,SEC24C,TAP1,PSMD12,AP1B1,PSMB10,HLA-DRB1,DCTN1,PSMB5,NCF2,PSMD4,CTSS,ACTR1A,PSMA7,PSMB2,PSMB9,PSMB8,TAP2,HLA-C,PSME1,SEC13,DNM2,DYNLL1,AP1G1,SEC31A,HLA-DRA,HLA-A,SEC24A,SAR1B,PSMD14,P…
GO:0006612	Protein targeting to membrane	78	165	0.7	1.16e-23	9606.ENSP00000221566,9606.ENSP00000222247,9606.ENSP00000223641,9606.ENSP00000225430,9606.ENSP00000230050,9606.ENSP00000251453,9606.ENSP00000259469,9606.ENSP00000262213,9606.ENSP00000262584,9606.ENSP00000267884,9606.ENSP00000270625,9606.ENSP00000272317,9606.ENSP00000278572,9606.ENSP00000296674,9606.ENSP00000302896,9606.ENSP00000305230,9606.ENSP00000306788,9606.ENSP00000307889,9606.ENSP00000309334,…	SGTA,RPL18A,SEC61B,RPL19,RPS12,RPS16,RPL35,TRAM1,RPL8,SRP14,RPS11,RPS27A,RPS3,RPS23,RPS9,SRP9,ARL6IP1,RPL13,RPL15,RPL38,RPL4,RPS15A,RPLP2,CHMP4A,RPS7,RPL7,RPS2,RPS21,RPL3,RPL27A,RPL21,RPS17,RPSA,RPL22,RPS26,MYO1C,RPL12,RPS27,SEC63,RPL5,RPL7A,RPS4X,RPL10A,RPL11,RPS6,RPL24,RPL34,RPL14,RPS8,RPS14,RPL31,UBA52,RPL23A,RPS18,RPL17,RPL9,RPL6,RPL10,RPS24,RPL32,RPL37A,RPL35A,RPL23,SRP19,RPL30,RPS20,RPS25,R…
GO:0009167	Purine ribonucleoside monophosphate metabolic process	17	36	0.7	2.89e-05	9606.ENSP00000236959,9606.ENSP00000286621,9606.ENSP00000298556,9606.ENSP00000313490,9606.ENSP00000321584,9606.ENSP00000339479,9606.ENSP00000346921,9606.ENSP00000355493,9606.ENSP00000357835,9606.ENSP00000362271,9606.ENSP00000367408,9606.ENSP00000367615,9606.ENSP00000371230,9606.ENSP00000382595,9606.ENSP00000419851,9606.ENSP00000438262,9606.ENSP00000485525	ATIC,ADK,HPRT1,PFAS,IMPDH2,NT5C2,AK2,ADSS,LHPP,AK1,CASK,APRT,AK3,PAICS,GMPS,TJP2,ADSL
GO:0030835	Negative regulation of actin filament depolymerization	17	36	0.7	2.89e-05	9606.ENSP00000248444,9606.ENSP00000259365,9606.ENSP00000263168,9606.ENSP00000263867,9606.ENSP00000264758,9606.ENSP00000303908,9606.ENSP00000308753,9606.ENSP00000348381,9606.ENSP00000349259,9606.ENSP00000356257,9606.ENSP00000357129,9606.ENSP00000361824,9606.ENSP00000362924,9606.ENSP00000378400,9606.ENSP00000401010,9606.ENSP00000449428,9606.ENSP00000451752	VIL1,TMOD1,CAPZA1,CAPG,ADD1,TWF2,TMOD3,ADD3,SPTBN1,LMOD1,SPTA1,SPTAN1,GSN,LIMA1,CAPZB,TWF1,SPTB
GO:2000641	Regulation of early endosome to late endosome transport	9	19	0.7	0.0059	9606.ENSP00000215832,9606.ENSP00000230085,9606.ENSP00000260818,9606.ENSP00000263025,9606.ENSP00000302486,9606.ENSP00000353408,9606.ENSP00000356042,9606.ENSP00000362680,9606.ENSP00000481314	MAPK1,SNX3,DNAJC13,MAPK3,MAP2K1,MSN,EZR,SRC,SNX12
GO:0006268	DNA unwinding involved in DNA replication	7	15	0.7	0.0235	9606.ENSP00000254719,9606.ENSP00000262105,9606.ENSP00000264156,9606.ENSP00000265056,9606.ENSP00000307288,9606.ENSP00000416739,9606.ENSP00000419665	RPA1,MCM4,MCM6,MCM2,MCM7,RECQL,SSBP1
GO:0006740	NADPH regeneration	7	15	0.7	0.0235	9606.ENSP00000252603,9606.ENSP00000321259,9606.ENSP00000352401,9606.ENSP00000371393,9606.ENSP00000390265,9606.ENSP00000391481,9606.ENSP00000416583	PGLS,TALDO1,RPE,PGM2,IDH1,TKT,DERA
GO:0098974	Postsynaptic actin cytoskeleton organization	7	15	0.7	0.0235	9606.ENSP00000292385,9606.ENSP00000320176,9606.ENSP00000358865,9606.ENSP00000365745,9606.ENSP00000417653,9606.ENSP00000458162,9606.ENSP00000483313	DBN1,HCLS1,INA,CTTN,DBNL,ACTG1,WASF2
GO:1903543	Positive regulation of exosomal secretion	7	15	0.7	0.0235	9606.ENSP00000238497,9606.ENSP00000251968,9606.ENSP00000265062,9606.ENSP00000331201,9606.ENSP00000366746,9606.ENSP00000370542,9606.ENSP00000411825	VPS4B,TSG101,RAB7A,HGS,STAM,SDC1,PDCD6IP
GO:0006412	Translation	169	366	0.69	7.96e-51	9606.ENSP00000081029,9606.ENSP00000216044,9606.ENSP00000216190,9606.ENSP00000216554,9606.ENSP00000220592,9606.ENSP00000220849,9606.ENSP00000222247,9606.ENSP00000223029,9606.ENSP00000225430,9606.ENSP00000225729,9606.ENSP00000230050,9606.ENSP00000234677,9606.ENSP00000245539,9606.ENSP00000248342,9606.ENSP00000251453,9606.ENSP00000253039,9606.ENSP00000253099,9606.ENSP00000253108,9606.ENSP00000254630,…	MRPS35,GTPBP1,EIF3D,EIF5,AGO2,EIF3E,RPL18A,AIMP2,RPL19,DRG2,RPS12,SARS,MRPS7,EIF3K,RPS16,EIF2S3,MRPL4,EIF3G,PTCD3,EIF2S1,MRPS36,NARS,MRPL44,MRPS9,RPL35,AARS,EIF3J,MARS,RPL8,DARS,EIF4H,RPS11,RPS27A,RPS3,MRPL49,FARSB,EIF5B,EIF4A1,APEH,ABCE1,RPS23,GCN1L1,PAIP1,RPS9,MRPL39,QARS,RPL13,EEF2,RPL15,RPL38,RPL4,PABPC1,ABCF1,TSFM,MRPL1,RPS15A,FARSA,RPLP2,TUFM,KARS,DRG1,EEF1G,EIF3C,MRPL12,EIF5A,LARP1,EEF1A1,…
GO:0006402	mRNA catabolic process	98	214	0.69	6.4e-29	9606.ENSP00000220849,9606.ENSP00000222247,9606.ENSP00000225430,9606.ENSP00000230050,9606.ENSP00000251453,9606.ENSP00000252622,9606.ENSP00000254878,9606.ENSP00000259469,9606.ENSP00000262584,9606.ENSP00000263579,9606.ENSP00000267973,9606.ENSP00000269349,9606.ENSP00000270625,9606.ENSP00000272317,9606.ENSP00000278572,9606.ENSP00000296674,9606.ENSP00000302896,9606.ENSP00000307889,9606.ENSP00000309142,…	EIF3E,RPL18A,RPL19,RPS12,RPS16,LSM7,HRSP12,RPL35,RPL8,DCPS,WDR61,EIF4A3,RPS11,RPS27A,RPS3,RPS23,RPS9,RPL13,PDE12,RPL15,RPL38,RPL4,PABPC1,RPS15A,CNOT1,RPLP2,PPP2R1A,PPP2R2A,RPS7,RPL7,RPS2,RPS21,RPL3,RPL27A,RPL21,RPS17,RPSA,RPL22,THRAP3,RPS26,EDC4,ETF1,RPL12,RPS27,RPL5,MAGOH,RPL7A,RPS4X,RPL10A,RPL11,NCBP1,LSM2,XRN2,DIS3,RPS6,RPL24,RPL34,RPL14,RPS8,KHSRP,RPS14,SSB,RPL31,UBA52,RPL23A,RPS18,RPL17,GSPT…
GO:0043487	Regulation of rna stability	89	192	0.69	1.54e-26	9606.ENSP00000044462,9606.ENSP00000157812,9606.ENSP00000210313,9606.ENSP00000215071,9606.ENSP00000216455,9606.ENSP00000216714,9606.ENSP00000216802,9606.ENSP00000217958,9606.ENSP00000219313,9606.ENSP00000223321,9606.ENSP00000228251,9606.ENSP00000229795,9606.ENSP00000240185,9606.ENSP00000254108,9606.ENSP00000254878,9606.ENSP00000258770,9606.ENSP00000259457,9606.ENSP00000261303,9606.ENSP00000261479,…	PSMA4,PSMC4,PSMD5,PSMD8,PSMA3,APEX1,PSME2,PSMD10,PSMD7,PSMA2,YBX3,MAPK14,TARDBP,FUS,HRSP12,TBRG4,PSMB7,PSMC1,PSMA6,PSMD11,PSMB1,PSMD3,NSUN2,PSMA5,RPS27A,HNRNPU,PSMB4,PSME3,NPM1,PAIP1,PDE12,PSMD1,PSMD2,PSMC5,PABPC1,HNRNPD,HNRNPA0,ROCK2,HNRNPM,TNPO1,LARP1,PSMF1,THRAP3,PSMD12,FXR1,PSMB10,PSMB5,DHX9,PSMD4,DKC1,SYNCRIP,FMR1,PSMA7,SERBP1,YBX1,SET,YWHAB,PABPC4,PSMB2,HNRNPR,PSMB9,PSMB8,DIS3,IGF2BP2,PSME1…
GO:0071826	Ribonucleoprotein complex subunit organization	88	193	0.69	7.38e-26	9606.ENSP00000215793,9606.ENSP00000215829,9606.ENSP00000216190,9606.ENSP00000216554,9606.ENSP00000220592,9606.ENSP00000220849,9606.ENSP00000227524,9606.ENSP00000228284,9606.ENSP00000229390,9606.ENSP00000235090,9606.ENSP00000244020,9606.ENSP00000245539,9606.ENSP00000248342,9606.ENSP00000253039,9606.ENSP00000253108,9606.ENSP00000258962,9606.ENSP00000261868,9606.ENSP00000266079,9606.ENSP00000266679,…	SF3A1,SNRPD3,EIF3D,EIF5,AGO2,EIF3E,PRPF19,SART3,SRSF9,WDR77,SRSF6,MRPS7,EIF3K,EIF2S3,EIF3G,SRSF1,EIF3J,PRPF6,CPSF6,NUDT21,SNRPD1,KIF5B,RPL38,SART1,USP39,PRKDC,SNRNP200,RUVBL1,PRMT5,RRS1,PRPF31,EIF3C,HSP90AA1,SF3B1,SNRPD2,CPSF7,RPL3,RPSA,CGI-74,VCP,EIF3B,RPL12,DHX9,ADAR,RPS27,EIF3A,RPL5,RBMX,MCTS1,HSP90AB1,SF3A3,EIF3I,SRPK1,EIF6,RPL11,EIF2S2,NCBP1,LSM2,SF1,PSIP1,DDX1,NOP2,XRCC5,RPL24,DDX39B,NHP2L1…
GO:0022618	Ribonucleoprotein complex assembly	85	186	0.69	5.03e-25	9606.ENSP00000215793,9606.ENSP00000215829,9606.ENSP00000216190,9606.ENSP00000216554,9606.ENSP00000220592,9606.ENSP00000220849,9606.ENSP00000227524,9606.ENSP00000228284,9606.ENSP00000229390,9606.ENSP00000235090,9606.ENSP00000244020,9606.ENSP00000245539,9606.ENSP00000248342,9606.ENSP00000253039,9606.ENSP00000253108,9606.ENSP00000258962,9606.ENSP00000261868,9606.ENSP00000266079,9606.ENSP00000266679,…	SF3A1,SNRPD3,EIF3D,EIF5,AGO2,EIF3E,PRPF19,SART3,SRSF9,WDR77,SRSF6,MRPS7,EIF3K,EIF2S3,EIF3G,SRSF1,EIF3J,PRPF6,CPSF6,NUDT21,SNRPD1,RPL38,SART1,USP39,PRKDC,SNRNP200,RUVBL1,PRMT5,RRS1,PRPF31,EIF3C,HSP90AA1,SF3B1,SNRPD2,CPSF7,RPL3,RPSA,CGI-74,EIF3B,RPL12,DHX9,ADAR,RPS27,EIF3A,RPL5,RBMX,MCTS1,HSP90AB1,SF3A3,EIF3I,SRPK1,EIF6,RPL11,EIF2S2,NCBP1,LSM2,SF1,PSIP1,DDX1,NOP2,XRCC5,RPL24,DDX39B,NHP2L1,RPS14,RPL…
GO:0019884	Antigen processing and presentation of exogenous antigen	83	182	0.69	2.16e-24	9606.ENSP00000044462,9606.ENSP00000054666,9606.ENSP00000157812,9606.ENSP00000210313,9606.ENSP00000215071,9606.ENSP00000216455,9606.ENSP00000216802,9606.ENSP00000217958,9606.ENSP00000219313,9606.ENSP00000223321,9606.ENSP00000236671,9606.ENSP00000247461,9606.ENSP00000250244,9606.ENSP00000258198,9606.ENSP00000259457,9606.ENSP00000261023,9606.ENSP00000261303,9606.ENSP00000261479,9606.ENSP00000261712,…	PSMA4,VAMP3,PSMC4,PSMD5,PSMD8,PSMA3,PSME2,PSMD10,PSMD7,PSMA2,CTSD,CANX,AP1M2,DYNC1LI2,PSMB7,ITGAV,PSMC1,PSMA6,PSMD11,PSMB1,CAPZA1,PSMD3,RAB7A,PSMA5,DYNC1LI1,PSMB4,AP2M1,PSME3,PDIA3,PSMD1,PSMD2,PSMC5,CALR,AP2A2,PSMF1,SEC24C,TAP1,AP3D1,PSMD12,AP1B1,PSMB10,HLA-DRB1,DCTN1,PSMB5,NCF2,PSMD4,CTSS,ACTR1A,PSMA7,PSMB2,PSMB9,PSMB8,TAP2,HLA-C,PSME1,SEC13,DNM2,DYNLL1,AP1G1,SEC31A,HLA-DRA,HLA-A,SEC24A,SAR1B,PS…
GO:0019079	Viral genome replication	13	28	0.69	0.00048	9606.ENSP00000256644,9606.ENSP00000273047,9606.ENSP00000290921,9606.ENSP00000305556,9606.ENSP00000311825,9606.ENSP00000317955,9606.ENSP00000317985,9606.ENSP00000351777,9606.ENSP00000352438,9606.ENSP00000362728,9606.ENSP00000380414,9606.ENSP00000383118,9606.ENSP00000442699	LAMTOR5,RAB5A,CTBP1,PCBP1,CTBP2,EEA1,ROCK2,VCP,PCBP2,KPNA6,DEK,CDC42,HTATSF1
GO:0000054	Ribosomal subunit export from nucleus	6	13	0.69	0.0465	9606.ENSP00000296577,9606.ENSP00000296930,9606.ENSP00000322396,9606.ENSP00000363574,9606.ENSP00000384863,9606.ENSP00000446215	ABCE1,NPM1,RRS1,EIF6,XPO1,RAN
GO:0006098	Pentose-phosphate shunt	6	13	0.69	0.0465	9606.ENSP00000252603,9606.ENSP00000321259,9606.ENSP00000352401,9606.ENSP00000371393,9606.ENSP00000391481,9606.ENSP00000416583	PGLS,TALDO1,RPE,PGM2,TKT,DERA
GO:0006266	DNA ligation	6	13	0.69	0.0465	9606.ENSP00000263274,9606.ENSP00000296503,9606.ENSP00000345347,9606.ENSP00000352257,9606.ENSP00000360682,9606.ENSP00000411532	LIG1,HMGB2,HMGB1,XRCC6,C9orf142,TOP2A
GO:0039694	Viral rna genome replication	6	13	0.69	0.0465	9606.ENSP00000273047,9606.ENSP00000305556,9606.ENSP00000317955,9606.ENSP00000317985,9606.ENSP00000352438,9606.ENSP00000383118	RAB5A,PCBP1,EEA1,ROCK2,PCBP2,CDC42
GO:0043650	Dicarboxylic acid biosynthetic process	6	13	0.69	0.0465	9606.ENSP00000216605,9606.ENSP00000245206,9606.ENSP00000277865,9606.ENSP00000317379,9606.ENSP00000388658,9606.ENSP00000478253	MTHFD1,GOT2,GLUD1,GLS,SLC25A12,MTHFD1L
GO:0098789	pre-mRNA cleavage required for polyadenylation	6	13	0.69	0.0465	9606.ENSP00000266679,9606.ENSP00000300291,9606.ENSP00000345412,9606.ENSP00000362063,9606.ENSP00000364289,9606.ENSP00000484669	CPSF6,NUDT21,CPSF7,CSTF2,NCBP1,CPSF1
GO:0043043	Peptide biosynthetic process	177	389	0.68	1.39e-52	9606.ENSP00000081029,9606.ENSP00000216044,9606.ENSP00000216190,9606.ENSP00000216554,9606.ENSP00000216951,9606.ENSP00000220592,9606.ENSP00000220849,9606.ENSP00000222247,9606.ENSP00000223029,9606.ENSP00000225430,9606.ENSP00000225729,9606.ENSP00000229416,9606.ENSP00000230050,9606.ENSP00000234677,9606.ENSP00000245539,9606.ENSP00000248342,9606.ENSP00000251453,9606.ENSP00000253039,9606.ENSP00000253099,…	MRPS35,GTPBP1,EIF3D,EIF5,GSS,AGO2,EIF3E,RPL18A,AIMP2,RPL19,DRG2,GCLC,RPS12,SARS,MRPS7,EIF3K,RPS16,EIF2S3,MRPL4,EIF3G,PTCD3,EIF2S1,MRPS36,NARS,MRPL44,MRPS9,RPL35,AARS,EIF3J,MARS,RPL8,DARS,EIF4H,RPS11,RPS27A,GGCT,RPS3,MRPL49,FARSB,EIF5B,EIF4A1,APEH,ABCE1,RPS23,GCN1L1,PAIP1,RPS9,MRPL39,QARS,RPL13,EEF2,RPL15,RPL38,RPL4,PABPC1,ABCF1,TSFM,MRPL1,RPS15A,FARSA,RPLP2,TUFM,KARS,CNDP2,DRG1,EEF1G,EIF3C,MRPL12…
GO:0061013	Regulation of mrna catabolic process	92	205	0.68	1.22e-26	9606.ENSP00000044462,9606.ENSP00000157812,9606.ENSP00000210313,9606.ENSP00000215071,9606.ENSP00000216044,9606.ENSP00000216455,9606.ENSP00000216714,9606.ENSP00000216802,9606.ENSP00000217958,9606.ENSP00000219313,9606.ENSP00000220592,9606.ENSP00000223321,9606.ENSP00000228251,9606.ENSP00000229795,9606.ENSP00000240185,9606.ENSP00000242351,9606.ENSP00000254108,9606.ENSP00000254878,9606.ENSP00000258770,…	PSMA4,PSMC4,PSMD5,PSMD8,GTPBP1,PSMA3,APEX1,PSME2,PSMD10,PSMD7,AGO2,PSMA2,YBX3,MAPK14,TARDBP,ZC3HAV1,FUS,HRSP12,TBRG4,PSMB7,PSMC1,PSMA6,PSMD11,PSMB1,PSMD3,PSMA5,RPS27A,HNRNPU,PSMB4,PSME3,NPM1,PAIP1,PDE12,PSMD1,PSMD2,PSMC5,PABPC1,HNRNPD,HNRNPA0,ROCK2,CNOT1,HNRNPM,TNPO1,LARP1,PSMF1,THRAP3,PSMD12,FXR1,PSMB10,PSMB5,DHX9,PSMD4,SYNCRIP,FMR1,PSMA7,SERBP1,YBX1,SET,YWHAB,PABPC4,PSMB2,HNRNPR,PSMB9,PSMB8,DIS…
GO:0048002	Antigen processing and presentation of peptide antigen	87	191	0.68	1.53e-25	9606.ENSP00000044462,9606.ENSP00000054666,9606.ENSP00000157812,9606.ENSP00000210313,9606.ENSP00000215071,9606.ENSP00000216455,9606.ENSP00000216802,9606.ENSP00000217958,9606.ENSP00000219313,9606.ENSP00000223321,9606.ENSP00000236671,9606.ENSP00000247461,9606.ENSP00000250244,9606.ENSP00000258198,9606.ENSP00000259457,9606.ENSP00000261023,9606.ENSP00000261303,9606.ENSP00000261479,9606.ENSP00000261712,…	PSMA4,VAMP3,PSMC4,PSMD5,PSMD8,PSMA3,PSME2,PSMD10,PSMD7,PSMA2,CTSD,CANX,AP1M2,DYNC1LI2,PSMB7,ITGAV,PSMC1,PSMA6,PSMD11,PSMB1,CAPZA1,PSMD3,RAB7A,IDE,PSMA5,DYNC1LI1,PSMB4,AZGP1,AP2M1,PSME3,ERAP1,PDIA3,PSMD1,PSMD2,PSMC5,CALR,AP2A2,PSMF1,SEC24C,TAP1,PSMD12,AP1B1,PSMB10,HLA-DRB1,DCTN1,PSMB5,NCF2,PSMD4,CTSS,ACTR1A,PSMA7,PSMB2,PSMB9,PSMB8,TAP2,HLA-C,PSME1,SEC13,DNM2,DYNLL1,AP1G1,SEC31A,HLA-DRA,HLA-A,SEC24…
GO:0043555	Regulation of translation in response to stress	9	20	0.68	0.0076	9606.ENSP00000256383,9606.ENSP00000268058,9606.ENSP00000326031,9606.ENSP00000368884,9606.ENSP00000382840,9606.ENSP00000386894,9606.ENSP00000416255,9606.ENSP00000435412,9606.ENSP00000473631	EIF2S1,PML,PPP1CA,RPS6KA3,DDX3X,RBM4,EIF4G1,RPS6KA1,DNAJC3
GO:1902750	Negative regulation of cell cycle g2/m phase transition	46	104	0.67	4.59e-13	9606.ENSP00000044462,9606.ENSP00000157812,9606.ENSP00000210313,9606.ENSP00000215071,9606.ENSP00000216455,9606.ENSP00000216802,9606.ENSP00000217958,9606.ENSP00000219313,9606.ENSP00000223321,9606.ENSP00000259457,9606.ENSP00000261303,9606.ENSP00000261479,9606.ENSP00000261712,9606.ENSP00000262193,9606.ENSP00000264639,9606.ENSP00000271308,9606.ENSP00000290541,9606.ENSP00000293362,9606.ENSP00000297338,…	PSMA4,PSMC4,PSMD5,PSMD8,PSMA3,PSME2,PSMD10,PSMD7,PSMA2,PSMB7,PSMC1,PSMA6,PSMD11,PSMB1,PSMD3,PSMA5,PSMB4,PSME3,RAD21,PSMD1,PSMD2,PSMC5,MRE11A,PSMF1,PSMD12,PSMB10,PSMB5,PSMD4,BRCC3,PSMA7,PSMB2,PSMB9,PSMB8,PSME1,FHL1,CDK1,PSMD14,PSMC2,PSMD13,PSMC6,PSMD6,H2AFY,CDK5RAP3,PSMD9,PSMC3,PSMB3
GO:0042255	Ribosome assembly	27	61	0.67	9.18e-08	9606.ENSP00000225698,9606.ENSP00000245539,9606.ENSP00000246868,9606.ENSP00000296930,9606.ENSP00000309830,9606.ENSP00000313420,9606.ENSP00000322396,9606.ENSP00000346001,9606.ENSP00000346067,9606.ENSP00000354739,9606.ENSP00000357555,9606.ENSP00000359345,9606.ENSP00000363574,9606.ENSP00000363676,9606.ENSP00000371858,9606.ENSP00000375978,9606.ENSP00000377640,9606.ENSP00000382840,9606.ENSP00000385958,…	C1QBP,MRPS7,SBDS,NPM1,RPL38,PRKDC,RRS1,RPL3,RPSA,RPL12,RPS27,RPL5,EIF6,RPL11,NOP2,XRCC5,RPL24,DDX3X,RPS14,RPL23A,RPL6,RPL10,EIF2A,RPLP0,RPS19,RPS28,RPS5
GO:0009161	Ribonucleoside monophosphate metabolic process	22	50	0.67	2.53e-06	9606.ENSP00000232607,9606.ENSP00000236959,9606.ENSP00000264705,9606.ENSP00000286621,9606.ENSP00000298556,9606.ENSP00000313490,9606.ENSP00000321584,9606.ENSP00000339479,9606.ENSP00000346921,9606.ENSP00000355493,9606.ENSP00000357835,9606.ENSP00000360939,9606.ENSP00000361512,9606.ENSP00000362271,9606.ENSP00000367408,9606.ENSP00000367615,9606.ENSP00000371230,9606.ENSP00000381504,9606.ENSP00000382595,…	UMPS,ATIC,CAD,ADK,HPRT1,PFAS,IMPDH2,NT5C2,AK2,ADSS,LHPP,CMPK1,PRPS1,AK1,CASK,APRT,AK3,PRPS2,PAICS,GMPS,TJP2,ADSL
GO:0009124	Nucleoside monophosphate biosynthetic process	19	43	0.67	1.61e-05	9606.ENSP00000232607,9606.ENSP00000236959,9606.ENSP00000264705,9606.ENSP00000286621,9606.ENSP00000298556,9606.ENSP00000313490,9606.ENSP00000318868,9606.ENSP00000321584,9606.ENSP00000349576,9606.ENSP00000355493,9606.ENSP00000357835,9606.ENSP00000360939,9606.ENSP00000361512,9606.ENSP00000367615,9606.ENSP00000370376,9606.ENSP00000381504,9606.ENSP00000382595,9606.ENSP00000419851,9606.ENSP00000485525	UMPS,ATIC,CAD,ADK,HPRT1,PFAS,SHMT1,IMPDH2,DCTD,ADSS,LHPP,CMPK1,PRPS1,APRT,DUT,PRPS2,PAICS,GMPS,ADSL
GO:0019882	Antigen processing and presentation	94	219	0.66	4.11e-26	9606.ENSP00000044462,9606.ENSP00000054666,9606.ENSP00000157812,9606.ENSP00000210313,9606.ENSP00000215071,9606.ENSP00000216455,9606.ENSP00000216802,9606.ENSP00000217958,9606.ENSP00000219313,9606.ENSP00000220166,9606.ENSP00000223321,9606.ENSP00000229340,9606.ENSP00000236671,9606.ENSP00000247461,9606.ENSP00000250244,9606.ENSP00000258198,9606.ENSP00000259457,9606.ENSP00000261023,9606.ENSP00000261303,…	PSMA4,VAMP3,PSMC4,PSMD5,PSMD8,PSMA3,PSME2,PSMD10,PSMD7,CTSH,PSMA2,RAB35,CTSD,CANX,AP1M2,DYNC1LI2,PSMB7,ITGAV,PSMC1,PSMA6,PSMD11,PSMB1,CAPZA1,PSMD3,RAB10,RAB7A,IDE,PSMA5,DYNC1LI1,PSMB4,AZGP1,AP2M1,PSME3,ERAP1,PDIA3,PSMD1,PSMD2,PSMC5,RAB6A,CALR,AP2A2,RFTN1,PSMF1,SEC24C,TAP1,AP3D1,PSMD12,AP1B1,PSMB10,HLA-DRB1,RAB5B,DCTN1,PSMB5,NCF2,PSMD4,CTSS,ACTR1A,PSMA7,PSMB2,PSMB9,PSMB8,TAP2,HLA-C,PSME1,SEC13,DNM…
GO:0048024	Regulation of mrna splicing, via spliceosome	47	110	0.66	6.35e-13	9606.ENSP00000221419,9606.ENSP00000225698,9606.ENSP00000227524,9606.ENSP00000228284,9606.ENSP00000229390,9606.ENSP00000233078,9606.ENSP00000244020,9606.ENSP00000253363,9606.ENSP00000258962,9606.ENSP00000261531,9606.ENSP00000261973,9606.ENSP00000262710,9606.ENSP00000282486,9606.ENSP00000283179,9606.ENSP00000297071,9606.ENSP00000307863,9606.ENSP00000313829,9606.ENSP00000318195,9606.ENSP00000325905,…	HNRNPL,C1QBP,PRPF19,SART3,SRSF9,DAZAP1,SRSF6,RBM39,SRSF1,SNW1,RBM25,ACIN1,MBNL1,HNRNPU,TRA2A,U2AF2,KHDRBS1,NCL,SRSF7,HNRNPA1,PRDX6,THRAP3,HNRNPA2B1,PTBP1,FXR1,FMR1,RBMX,MAGOH,SRSF3,SRPK1,NCBP1,HNRNPK,RBM3,SF1,SRSF2,DDX17,SMU1,RBM4,PTBP3,TRA2B,SRSF10,HSPA8,PUF60,CELF2,RNPS1,RBM8A,SAP18
GO:0000027	Ribosomal large subunit assembly	12	28	0.66	0.0016	9606.ENSP00000309830,9606.ENSP00000322396,9606.ENSP00000346001,9606.ENSP00000354739,9606.ENSP00000359345,9606.ENSP00000363676,9606.ENSP00000371858,9606.ENSP00000377640,9606.ENSP00000389103,9606.ENSP00000403172,9606.ENSP00000413436,9606.ENSP00000449328	RPL38,RRS1,RPL3,RPL12,RPL5,RPL11,NOP2,RPL24,RPL23A,RPL6,RPL10,RPLP0
GO:0000470	Maturation of lsu-rrna	12	28	0.66	0.0016	9606.ENSP00000259469,9606.ENSP00000263239,9606.ENSP00000315017,9606.ENSP00000339795,9606.ENSP00000346725,9606.ENSP00000354040,9606.ENSP00000361076,9606.ENSP00000363018,9606.ENSP00000363574,9606.ENSP00000371858,9606.ENSP00000383949,9606.ENSP00000460871	RPL35,DDX18,MRPL1,RPL7,PES1,GTPBP4,RPL7A,RPL10A,EIF6,NOP2,NHP2L1,RSL1D1
GO:0009226	Nucleotide-sugar biosynthetic process	10	23	0.66	0.0049	9606.ENSP00000210444,9606.ENSP00000216410,9606.ENSP00000309092,9606.ENSP00000319501,9606.ENSP00000338703,9606.ENSP00000349860,9606.ENSP00000370194,9606.ENSP00000398803,9606.ENSP00000423674,9606.ENSP00000425809	NANS,GNPNAT1,GMPPB,UGDH,UGP2,GFPT1,GMDS,TSTA3,GNPDA1,PGM3
GO:1903311	Regulation of mrna metabolic process	141	338	0.65	2.38e-38	9606.ENSP00000044462,9606.ENSP00000157812,9606.ENSP00000210313,9606.ENSP00000215071,9606.ENSP00000216044,9606.ENSP00000216455,9606.ENSP00000216714,9606.ENSP00000216802,9606.ENSP00000217958,9606.ENSP00000219313,9606.ENSP00000220592,9606.ENSP00000221419,9606.ENSP00000223321,9606.ENSP00000225698,9606.ENSP00000227524,9606.ENSP00000228251,9606.ENSP00000228284,9606.ENSP00000229390,9606.ENSP00000229795,…	PSMA4,PSMC4,PSMD5,PSMD8,GTPBP1,PSMA3,APEX1,PSME2,PSMD10,PSMD7,AGO2,HNRNPL,PSMA2,C1QBP,PRPF19,YBX3,SART3,SRSF9,MAPK14,DAZAP1,TARDBP,ZC3HAV1,SNRPA,SRSF6,RBM39,FUS,HRSP12,TBRG4,SRSF1,PSMB7,PSMC1,PSMA6,SNW1,PSMD11,RBM25,PSMB1,ACIN1,PSMD3,CPSF6,PSMA5,RPS27A,MBNL1,HNRNPU,PSMB4,PSME3,NPM1,TRA2A,NUDT21,PAIP1,U2AF2,PDE12,PSMD1,PSMD2,PSMC5,PABPC1,HNRNPD,KHDRBS1,HNRNPA0,ROCK2,NCL,CNOT1,HNRNPM,SRSF7,TNPO1,LA…
GO:0000375	RNA splicing, via transesterification reactions	125	297	0.65	3.54e-34	9606.ENSP00000215793,9606.ENSP00000215829,9606.ENSP00000216252,9606.ENSP00000216832,9606.ENSP00000217109,9606.ENSP00000221419,9606.ENSP00000227524,9606.ENSP00000228284,9606.ENSP00000229390,9606.ENSP00000230640,9606.ENSP00000235090,9606.ENSP00000238112,9606.ENSP00000243563,9606.ENSP00000244020,9606.ENSP00000246071,9606.ENSP00000246194,9606.ENSP00000249299,9606.ENSP00000252622,9606.ENSP00000254108,…	SF3A1,SNRPD3,PHF5A,PNN,CSTF1,HNRNPL,PRPF19,SART3,SRSF9,SKIV2L2,WDR77,CPSF3,SNRPA,SRSF6,SNRPB2,RALY,LSM8,LSM7,FUS,SNRPA1,SRSF1,SNW1,DCPS,SNRNP40,DNAJC8,HNRNPH3,CCAR1,PRPF6,EIF4A3,NONO,HNRNPU,U2AFBP,RAVER1,TRA2A,NUDT21,SNRPD1,SRRM2,PCBP1,SF3B3,PPIH,U2AF2,SART1,USP39,PABPC1,HNRNPD,HNRNPA0,SNRNP200,SF3B2,PRMT5,PRPF31,HNRNPM,SRSF7,SRRM1,SF3B1,PRPF4B,HNRNPA1,SNRPD2,PSPC1,CPSF7,HNRNPA2B1,CGI-74,HNRNPH1,…
GO:0000398	mRNA splicing, via spliceosome	124	294	0.65	5.66e-34	9606.ENSP00000215793,9606.ENSP00000215829,9606.ENSP00000216252,9606.ENSP00000216832,9606.ENSP00000217109,9606.ENSP00000221419,9606.ENSP00000227524,9606.ENSP00000228284,9606.ENSP00000229390,9606.ENSP00000230640,9606.ENSP00000235090,9606.ENSP00000238112,9606.ENSP00000243563,9606.ENSP00000244020,9606.ENSP00000246071,9606.ENSP00000246194,9606.ENSP00000249299,9606.ENSP00000252622,9606.ENSP00000254108,…	SF3A1,SNRPD3,PHF5A,PNN,CSTF1,HNRNPL,PRPF19,SART3,SRSF9,SKIV2L2,WDR77,CPSF3,SNRPA,SRSF6,SNRPB2,RALY,LSM8,LSM7,FUS,SNRPA1,SRSF1,SNW1,DCPS,SNRNP40,DNAJC8,HNRNPH3,CCAR1,PRPF6,EIF4A3,NONO,HNRNPU,U2AFBP,RAVER1,TRA2A,NUDT21,SNRPD1,SRRM2,PCBP1,SF3B3,PPIH,U2AF2,SART1,USP39,PABPC1,HNRNPD,HNRNPA0,SNRNP200,SF3B2,PRMT5,PRPF31,HNRNPM,SRSF7,SRRM1,SF3B1,PRPF4B,HNRNPA1,SNRPD2,PSPC1,CPSF7,HNRNPA2B1,CGI-74,HNRNPH1,…
GO:0006401	RNA catabolic process	105	247	0.65	6.43e-29	9606.ENSP00000220849,9606.ENSP00000222247,9606.ENSP00000225430,9606.ENSP00000230050,9606.ENSP00000230640,9606.ENSP00000242784,9606.ENSP00000251453,9606.ENSP00000252622,9606.ENSP00000254878,9606.ENSP00000259469,9606.ENSP00000262584,9606.ENSP00000263579,9606.ENSP00000267973,9606.ENSP00000269349,9606.ENSP00000270625,9606.ENSP00000272317,9606.ENSP00000278572,9606.ENSP00000296674,9606.ENSP00000302896,…	EIF3E,RPL18A,RPL19,RPS12,SKIV2L2,C19orf43,RPS16,LSM7,HRSP12,RPL35,RPL8,DCPS,WDR61,EIF4A3,RPS11,RPS27A,RPS3,RPS23,RPS9,FEN1,RPL13,PDE12,RPL15,RPL38,RPL4,PPP1R8,PABPC1,HNRNPD,RPS15A,CNOT1,RPLP2,PPP2R1A,PPP2R2A,RPS7,RPL7,RPS2,RPS21,RPL3,RPL27A,RPL21,RPS17,RPSA,RPL22,THRAP3,RPS26,EDC4,ETF1,RPL12,RPS27,RPL5,MAGOH,RPL7A,PABPC4,RPS4X,RPL10A,RPL11,NCBP1,LSM2,XRN2,DIS3,RPS6,RPL24,RPL34,RPL14,RPS8,KHSRP,RP…
GO:0090175	Regulation of establishment of planar polarity	47	111	0.65	8.15e-13	9606.ENSP00000044462,9606.ENSP00000157812,9606.ENSP00000210313,9606.ENSP00000215071,9606.ENSP00000216455,9606.ENSP00000216802,9606.ENSP00000217958,9606.ENSP00000219313,9606.ENSP00000223321,9606.ENSP00000259457,9606.ENSP00000261303,9606.ENSP00000261479,9606.ENSP00000261712,9606.ENSP00000262193,9606.ENSP00000264639,9606.ENSP00000271308,9606.ENSP00000290541,9606.ENSP00000292807,9606.ENSP00000293362,…	PSMA4,PSMC4,PSMD5,PSMD8,PSMA3,PSME2,PSMD10,PSMD7,PSMA2,PSMB7,PSMC1,PSMA6,PSMD11,PSMB1,PSMD3,PSMA5,PSMB4,AP2M1,PSME3,PSMD1,PSMD2,PSMC5,AP2A2,PSMF1,PSMD12,RAC1,PSMB10,PSMB5,PSMD4,PSMA7,PSMB2,PSMB9,PSMB8,PSME1,CDC42,PSMD14,PSMC2,PSMD13,RHOA,PSMC6,PSMD6,SEC24B,PSMD9,CLTC,PSMC3,AP2B1,PSMB3
GO:0031146	SCF-dependent proteasomal ubiquitin-dependent protein catabolic process	39	93	0.65	1.49e-10	9606.ENSP00000044462,9606.ENSP00000157812,9606.ENSP00000210313,9606.ENSP00000215071,9606.ENSP00000216455,9606.ENSP00000216802,9606.ENSP00000217958,9606.ENSP00000219313,9606.ENSP00000223321,9606.ENSP00000259457,9606.ENSP00000261303,9606.ENSP00000261479,9606.ENSP00000261712,9606.ENSP00000262193,9606.ENSP00000264639,9606.ENSP00000271308,9606.ENSP00000290541,9606.ENSP00000293362,9606.ENSP00000309474,…	PSMA4,PSMC4,PSMD5,PSMD8,PSMA3,PSME2,PSMD10,PSMD7,PSMA2,PSMB7,PSMC1,PSMA6,PSMD11,PSMB1,PSMD3,PSMA5,PSMB4,PSME3,PSMD1,PSMD2,PSMC5,PSMF1,PSMD12,PSMB10,PSMB5,PSMD4,PSMA7,PSMB2,PSMB9,PSMB8,PSME1,PSMD14,PSMC2,PSMD13,PSMC6,PSMD6,PSMD9,PSMC3,PSMB3
GO:1903902	Positive regulation of viral life cycle	26	62	0.65	4.09e-07	9606.ENSP00000215909,9606.ENSP00000238497,9606.ENSP00000251968,9606.ENSP00000254436,9606.ENSP00000261875,9606.ENSP00000286713,9606.ENSP00000301764,9606.ENSP00000303754,9606.ENSP00000306614,9606.ENSP00000309142,9606.ENSP00000313007,9606.ENSP00000336721,9606.ENSP00000345656,9606.ENSP00000353099,9606.ENSP00000357459,9606.ENSP00000359506,9606.ENSP00000360922,9606.ENSP00000362728,9606.ENSP00000362931,…	LGALS1,VPS4B,TSG101,TRIM21,PTPLAD1,STOM,DDB1,PPID,PPIH,PDE12,PABPC1,LARP1,VAPA,HLA-DRB1,ADAR,FMR1,STAU1,KPNA6,SRPK1,LGALS9,DDX3X,TOP2B,TOP2A,VAPB,PPIA,HSPA8
GO:0006081	Cellular aldehyde metabolic process	23	55	0.65	2.67e-06	9606.ENSP00000225573,9606.ENSP00000229270,9606.ENSP00000245206,9606.ENSP00000249750,9606.ENSP00000291565,9606.ENSP00000313432,9606.ENSP00000321259,9606.ENSP00000331897,9606.ENSP00000346827,9606.ENSP00000355377,9606.ENSP00000361140,9606.ENSP00000362463,9606.ENSP00000364490,9606.ENSP00000367992,9606.ENSP00000369927,9606.ENSP00000370750,9606.ENSP00000378360,9606.ENSP00000380514,9606.ENSP00000387123,…	PNPO,TPI1,GOT2,ALDH1A2,PDXK,GRHPR,TALDO1,IDH2,ALDH9A1,AKR7A3,AKR1A1,GLO1,ALDH4A1,ESD,AKR1C3,RDH11,DAK,HAGH,ALDH7A1,IDH1,RDH13,TKT,PARK7
GO:0061077	Chaperone-mediated protein folding	23	55	0.65	2.67e-06	9606.ENSP00000001008,9606.ENSP00000216218,9606.ENSP00000217244,9606.ENSP00000221566,9606.ENSP00000233893,9606.ENSP00000246957,9606.ENSP00000254322,9606.ENSP00000286091,9606.ENSP00000297185,9606.ENSP00000299300,9606.ENSP00000303754,9606.ENSP00000314499,9606.ENSP00000318687,9606.ENSP00000319255,9606.ENSP00000323696,9606.ENSP00000354111,9606.ENSP00000366237,9606.ENSP00000379042,9606.ENSP00000383003,…	FKBP4,ST13,CSNK2A1,SGTA,HSPE1,TRAP1,DNAJB1,PDIA4,HSPA9,CCT2,PPID,GAK,HSPH1,CHORDC1,CRTAP,DNAJC5,DFFA,ERO1L,FKBP1A,UNC45A,HSPA8,FKBP5,HSPB6
GO:0000381	Regulation of alternative mrna splicing, via spliceosome	30	73	0.64	5.05e-08	9606.ENSP00000221419,9606.ENSP00000228284,9606.ENSP00000229390,9606.ENSP00000244020,9606.ENSP00000258962,9606.ENSP00000261973,9606.ENSP00000282486,9606.ENSP00000283179,9606.ENSP00000313829,9606.ENSP00000325905,9606.ENSP00000341826,9606.ENSP00000346634,9606.ENSP00000349428,9606.ENSP00000350170,9606.ENSP00000359506,9606.ENSP00000359645,9606.ENSP00000360525,9606.ENSP00000362820,9606.ENSP00000366604,…	HNRNPL,SART3,SRSF9,SRSF6,SRSF1,RBM25,MBNL1,HNRNPU,KHDRBS1,SRSF7,HNRNPA1,THRAP3,PTBP1,FXR1,FMR1,RBMX,MAGOH,SRSF3,SF1,SRSF2,DDX17,SMU1,RBM4,TRA2B,SRSF10,PUF60,CELF2,RNPS1,RBM8A,SAP18
GO:0000387	Spliceosomal snrnp assembly	16	39	0.64	0.00021	9606.ENSP00000215829,9606.ENSP00000227524,9606.ENSP00000228284,9606.ENSP00000235090,9606.ENSP00000266079,9606.ENSP00000300413,9606.ENSP00000310448,9606.ENSP00000319169,9606.ENSP00000324122,9606.ENSP00000342374,9606.ENSP00000364813,9606.ENSP00000412566,9606.ENSP00000420195,9606.ENSP00000433919,9606.ENSP00000460348,9606.ENSP00000469468	SNRPD3,PRPF19,SART3,WDR77,PRPF6,SNRPD1,SART1,PRMT5,PRPF31,SNRPD2,LSM2,SNRPB,SRSF10,CLNS1A,PRPF8,LSM4
GO:0030866	Cortical actin cytoskeleton organization	16	39	0.64	0.00021	9606.ENSP00000248444,9606.ENSP00000263277,9606.ENSP00000298316,9606.ENSP00000307292,9606.ENSP00000316029,9606.ENSP00000317985,9606.ENSP00000320866,9606.ENSP00000336831,9606.ENSP00000338481,9606.ENSP00000343158,9606.ENSP00000345259,9606.ENSP00000356042,9606.ENSP00000376333,9606.ENSP00000382697,9606.ENSP00000411825,9606.ENSP00000419782	VIL1,EHD2,ARF6,PRKCDBP,TLN1,ROCK2,CALR,PLS1,EPB41L2,EPB41L3,EPB41,EZR,LLGL2,ROCK1,PDCD6IP,CDK5
GO:0006409	tRNA export from nucleus	14	34	0.64	0.00065	9606.ENSP00000245544,9606.ENSP00000254508,9606.ENSP00000261396,9606.ENSP00000283195,9606.ENSP00000285968,9606.ENSP00000310668,9606.ENSP00000327821,9606.ENSP00000356448,9606.ENSP00000367721,9606.ENSP00000373312,9606.ENSP00000379182,9606.ENSP00000386636,9606.ENSP00000446215,9606.ENSP00000471191	NUP85,NUP210,NUP133,RANBP2,NUP205,NUP93,XPOT,TPR,NUP160,SEC13,RAE1,SSB,RAN,NUP62
GO:0032212	Positive regulation of telomere maintenance via telomerase	14	34	0.64	0.00065	9606.ENSP00000215832,9606.ENSP00000258091,9606.ENSP00000263025,9606.ENSP00000275603,9606.ENSP00000280326,9606.ENSP00000286788,9606.ENSP00000295688,9606.ENSP00000299300,9606.ENSP00000317334,9606.ENSP00000341826,9606.ENSP00000344456,9606.ENSP00000358563,9606.ENSP00000375978,9606.ENSP00000377958	MAPK1,CCT7,MAPK3,CCT6A,CCT5,CCT8,CCT3,CCT2,TCP1,HNRNPA1,CTNNB1,DKC1,XRCC5,CCT4
GO:0045292	mRNA cis splicing, via spliceosome	13	32	0.64	0.0013	9606.ENSP00000229390,9606.ENSP00000244020,9606.ENSP00000258962,9606.ENSP00000263579,9606.ENSP00000310448,9606.ENSP00000317123,9606.ENSP00000325905,9606.ENSP00000362820,9606.ENSP00000364289,9606.ENSP00000370109,9606.ENSP00000376276,9606.ENSP00000386894,9606.ENSP00000420195	SRSF9,SRSF6,SRSF1,DCPS,SART1,SNRNP200,SRSF7,SRSF3,NCBP1,PSIP1,SRSF2,RBM4,SRSF10
GO:0050685	Positive regulation of mrna processing	13	32	0.64	0.0013	9606.ENSP00000227524,9606.ENSP00000233078,9606.ENSP00000261531,9606.ENSP00000297071,9606.ENSP00000300291,9606.ENSP00000318195,9606.ENSP00000342026,9606.ENSP00000346634,9606.ENSP00000359645,9606.ENSP00000364289,9606.ENSP00000365950,9606.ENSP00000416959,9606.ENSP00000432083	PRPF19,DAZAP1,SNW1,TRA2A,NUDT21,NCL,PRDX6,THRAP3,RBMX,NCBP1,RBM3,TRA2B,HSPA8
GO:0051291	Protein heterooligomerization	9	22	0.64	0.0123	9606.ENSP00000266679,9606.ENSP00000281828,9606.ENSP00000300291,9606.ENSP00000300738,9606.ENSP00000303147,9606.ENSP00000303525,9606.ENSP00000320309,9606.ENSP00000345412,9606.ENSP00000353770	CPSF6,FARSB,NUDT21,RRM1,MAT2A,CBR4,FARSA,CPSF7,RRM2
GO:0070987	Error-free translesion synthesis	9	22	0.64	0.0123	9606.ENSP00000254719,9606.ENSP00000263202,9606.ENSP00000272317,9606.ENSP00000331487,9606.ENSP00000351777,9606.ENSP00000363017,9606.ENSP00000368458,9606.ENSP00000388107,9606.ENSP00000475924	RPA1,UFD1L,RPS27A,NPLOC4,VCP,RPA2,PCNA,UBA52,POLDIP2
GO:0010984	Regulation of lipoprotein particle clearance	7	17	0.64	0.0382	9606.ENSP00000220003,9606.ENSP00000227667,9606.ENSP00000273308,9606.ENSP00000346032,9606.ENSP00000365439,9606.ENSP00000381216,9606.ENSP00000465356	CSK,APOC3,CNPY2,ANXA2,HNRNPK,KHSRP,APOC1
GO:0051444	Negative regulation of ubiquitin-protein transferase activity	7	17	0.64	0.0382	9606.ENSP00000296161,9606.ENSP00000339095,9606.ENSP00000359345,9606.ENSP00000359727,9606.ENSP00000363676,9606.ENSP00000418770,9606.ENSP00000420311	DTX3L,RPS7,RPL5,BAG2,RPL11,PARK7,RPL23
GO:0006518	Peptide metabolic process	203	503	0.63	5.33e-54	9606.ENSP00000081029,9606.ENSP00000216044,9606.ENSP00000216190,9606.ENSP00000216336,9606.ENSP00000216554,9606.ENSP00000216951,9606.ENSP00000220166,9606.ENSP00000220592,9606.ENSP00000220849,9606.ENSP00000221130,9606.ENSP00000222247,9606.ENSP00000223029,9606.ENSP00000225430,9606.ENSP00000225729,9606.ENSP00000228740,9606.ENSP00000229416,9606.ENSP00000230050,9606.ENSP00000234677,9606.ENSP00000245539,…	MRPS35,GTPBP1,EIF3D,CTSG,EIF5,GSS,CTSH,AGO2,EIF3E,GSR,RPL18A,AIMP2,RPL19,DRG2,LTA4H,GCLC,RPS12,SARS,MRPS7,EIF3K,CMA1,RPS16,EIF2S3,MRPL4,EIF3G,PTCD3,EIF2S1,MRPS36,NARS,MRPL44,MRPS9,RPL35,AARS,EIF3J,MARS,RPL8,SPCS2,DARS,EIF4H,IDE,SOD1,RPS11,RPS27A,DNPEP,GGCT,RPS3,MRPL49,FARSB,EIF5B,ETHE1,EIF4A1,NCSTN,APEH,ABCE1,RPS23,ERAP1,TPP1,GCN1L1,PAIP1,RPS9,THOP1,MRPL39,QARS,RPL13,EEF2,RPL15,RPL38,RPL4,PABPC1,…
GO:0035567	Non-canonical wnt signaling pathway	52	130	0.63	2.26e-13	9606.ENSP00000044462,9606.ENSP00000157812,9606.ENSP00000210313,9606.ENSP00000215071,9606.ENSP00000216455,9606.ENSP00000216802,9606.ENSP00000217958,9606.ENSP00000219313,9606.ENSP00000220592,9606.ENSP00000223321,9606.ENSP00000259457,9606.ENSP00000261303,9606.ENSP00000261479,9606.ENSP00000261712,9606.ENSP00000262193,9606.ENSP00000262494,9606.ENSP00000264639,9606.ENSP00000271308,9606.ENSP00000290541,…	PSMA4,PSMC4,PSMD5,PSMD8,PSMA3,PSME2,PSMD10,PSMD7,AGO2,PSMA2,PSMB7,PSMC1,PSMA6,PSMD11,PSMB1,GNAO1,PSMD3,PSMA5,PSMB4,CALM3,AP2M1,PSME3,PSMD1,PSMD2,PSMC5,AP2A2,PSMF1,CTNNB1,PSMD12,RAC1,PSMB10,PSMB5,PSMD4,PSMA7,PSMB2,PSMB9,PSMB8,PSME1,CDC42,PSMD14,PSMC2,PSMD13,RHOA,PSMC6,PSMD6,PSMD9,PLCB3,CLTC,PSMC3,GNB1,AP2B1,PSMB3
GO:0043620	Regulation of dna-templated transcription in response to stress	50	124	0.63	5.65e-13	9606.ENSP00000044462,9606.ENSP00000157812,9606.ENSP00000210313,9606.ENSP00000215071,9606.ENSP00000216455,9606.ENSP00000216802,9606.ENSP00000217958,9606.ENSP00000219313,9606.ENSP00000223321,9606.ENSP00000254322,9606.ENSP00000259457,9606.ENSP00000261303,9606.ENSP00000261479,9606.ENSP00000261712,9606.ENSP00000262193,9606.ENSP00000262306,9606.ENSP00000264639,9606.ENSP00000271308,9606.ENSP00000272317,…	PSMA4,PSMC4,PSMD5,PSMD8,PSMA3,PSME2,PSMD10,PSMD7,PSMA2,DNAJB1,PSMB7,PSMC1,PSMA6,PSMD11,PSMB1,TCEB2,PSMD3,PSMA5,RPS27A,PSMB4,PSME3,GCN1L1,PSMD1,PSMD2,PSMC5,PSMF1,PSMD12,PSMB10,PSMB5,PSMD4,BAG3,PSMA7,PSMB2,PSMB9,PSMB8,RPS6KA3,PSME1,SIN3A,PSMD14,UBA52,PSMC2,PSMD13,PSMC6,PSMD6,BCLAF1,RPS6KA1,PSMD9,TCEB1,PSMC3,PSMB3
GO:0043618	Regulation of transcription from rna polymerase ii promoter in response to stress	47	118	0.63	4.59e-12	9606.ENSP00000044462,9606.ENSP00000157812,9606.ENSP00000210313,9606.ENSP00000215071,9606.ENSP00000216455,9606.ENSP00000216802,9606.ENSP00000217958,9606.ENSP00000219313,9606.ENSP00000223321,9606.ENSP00000254322,9606.ENSP00000259457,9606.ENSP00000261303,9606.ENSP00000261479,9606.ENSP00000261712,9606.ENSP00000262193,9606.ENSP00000262306,9606.ENSP00000264639,9606.ENSP00000271308,9606.ENSP00000272317,…	PSMA4,PSMC4,PSMD5,PSMD8,PSMA3,PSME2,PSMD10,PSMD7,PSMA2,DNAJB1,PSMB7,PSMC1,PSMA6,PSMD11,PSMB1,TCEB2,PSMD3,PSMA5,RPS27A,PSMB4,PSME3,GCN1L1,PSMD1,PSMD2,PSMC5,PSMF1,PSMD12,PSMB10,PSMB5,PSMD4,BAG3,PSMA7,PSMB2,PSMB9,PSMB8,PSME1,SIN3A,PSMD14,UBA52,PSMC2,PSMD13,PSMC6,PSMD6,PSMD9,TCEB1,PSMC3,PSMB3
GO:0038095	Fc-epsilon receptor signaling pathway	46	115	0.63	7.35e-12	9606.ENSP00000044462,9606.ENSP00000157812,9606.ENSP00000210313,9606.ENSP00000215071,9606.ENSP00000215832,9606.ENSP00000216455,9606.ENSP00000216802,9606.ENSP00000217958,9606.ENSP00000219313,9606.ENSP00000223321,9606.ENSP00000226574,9606.ENSP00000259457,9606.ENSP00000261303,9606.ENSP00000261479,9606.ENSP00000261712,9606.ENSP00000262193,9606.ENSP00000263025,9606.ENSP00000264639,9606.ENSP00000271308,…	PSMA4,PSMC4,PSMD5,PSMD8,MAPK1,PSMA3,PSME2,PSMD10,PSMD7,PSMA2,NFKB1,PSMB7,PSMC1,PSMA6,PSMD11,PSMB1,MAPK3,PSMD3,PSMA5,PSMB4,CALM3,PSME3,PSMD1,PSMD2,PSMC5,PAK2,PSMF1,PSMD12,RAC1,PSMB10,PSMB5,PSMD4,PSMA7,PSMB2,PSMB9,PSMB8,PSME1,GRB2,PSMD14,PSMC2,PSMD13,PSMC6,PSMD6,PSMD9,PSMC3,PSMB3
GO:0000245	Spliceosomal complex assembly	24	60	0.63	2.74e-06	9606.ENSP00000215793,9606.ENSP00000227524,9606.ENSP00000229390,9606.ENSP00000244020,9606.ENSP00000258962,9606.ENSP00000266079,9606.ENSP00000300413,9606.ENSP00000312981,9606.ENSP00000317123,9606.ENSP00000335321,9606.ENSP00000342374,9606.ENSP00000347005,9606.ENSP00000359645,9606.ENSP00000362110,9606.ENSP00000362931,9606.ENSP00000364289,9606.ENSP00000366604,9606.ENSP00000370109,9606.ENSP00000370745,…	SF3A1,PRPF19,SRSF9,SRSF6,SRSF1,PRPF6,SNRPD1,USP39,SNRNP200,SF3B1,SNRPD2,CGI-74,RBMX,SF3A3,SRPK1,NCBP1,SF1,PSIP1,DDX1,DDX39B,SRSF10,LUC7L3,PUF60,CELF2
GO:0009112	Nucleobase metabolic process	15	37	0.63	0.00042	9606.ENSP00000215832,9606.ENSP00000216605,9606.ENSP00000232607,9606.ENSP00000264705,9606.ENSP00000298556,9606.ENSP00000300738,9606.ENSP00000313490,9606.ENSP00000318868,9606.ENSP00000360939,9606.ENSP00000361512,9606.ENSP00000367615,9606.ENSP00000382595,9606.ENSP00000419851,9606.ENSP00000450436,9606.ENSP00000478253	MAPK1,MTHFD1,UMPS,CAD,HPRT1,RRM1,PFAS,SHMT1,CMPK1,PRPS1,APRT,PAICS,GMPS,ALDH6A1,MTHFD1L
GO:0051031	tRNA transport	15	37	0.63	0.00042	9606.ENSP00000245544,9606.ENSP00000254508,9606.ENSP00000261396,9606.ENSP00000283195,9606.ENSP00000285968,9606.ENSP00000310668,9606.ENSP00000327821,9606.ENSP00000356448,9606.ENSP00000361626,9606.ENSP00000367721,9606.ENSP00000373312,9606.ENSP00000379182,9606.ENSP00000386636,9606.ENSP00000446215,9606.ENSP00000471191	NUP85,NUP210,NUP133,RANBP2,NUP205,NUP93,XPOT,TPR,YBX1,NUP160,SEC13,RAE1,SSB,RAN,NUP62
GO:1904358	Positive regulation of telomere maintenance via telomere lengthening	15	37	0.63	0.00042	9606.ENSP00000215832,9606.ENSP00000258091,9606.ENSP00000263025,9606.ENSP00000275603,9606.ENSP00000280326,9606.ENSP00000286788,9606.ENSP00000295688,9606.ENSP00000299300,9606.ENSP00000317334,9606.ENSP00000341826,9606.ENSP00000344456,9606.ENSP00000346694,9606.ENSP00000358563,9606.ENSP00000375978,9606.ENSP00000377958	MAPK1,CCT7,MAPK3,CCT6A,CCT5,CCT8,CCT3,CCT2,TCP1,HNRNPA1,CTNNB1,HNRNPA2B1,DKC1,XRCC5,CCT4
GO:0046039	GTP metabolic process	10	25	0.63	0.0079	9606.ENSP00000216044,9606.ENSP00000219302,9606.ENSP00000321584,9606.ENSP00000337060,9606.ENSP00000358867,9606.ENSP00000371230,9606.ENSP00000376886,9606.ENSP00000400175,9606.ENSP00000417610,9606.ENSP00000446215	GTPBP1,NME3,IMPDH2,NME1,GNAI3,AK3,NME1-NME2,RHOA,RAB23,RAN
GO:0002218	Activation of innate immune response	56	142	0.62	3.61e-14	9606.ENSP00000044462,9606.ENSP00000157812,9606.ENSP00000210313,9606.ENSP00000215071,9606.ENSP00000216455,9606.ENSP00000216802,9606.ENSP00000217958,9606.ENSP00000219313,9606.ENSP00000223321,9606.ENSP00000226574,9606.ENSP00000247470,9606.ENSP00000256078,9606.ENSP00000259457,9606.ENSP00000261303,9606.ENSP00000261479,9606.ENSP00000261712,9606.ENSP00000262193,9606.ENSP00000264639,9606.ENSP00000271308,…	PSMA4,PSMC4,PSMD5,PSMD8,PSMA3,PSME2,PSMD10,PSMD7,PSMA2,NFKB1,PYCARD,KRAS,PSMB7,PSMC1,PSMA6,PSMD11,PSMB1,PSMD3,PSMA5,NONO,PSMB4,PSME3,PSMD1,PSMD2,PSMC5,RBM14,PRKDC,PAK2,PSMF1,PSPC1,HMGB1,PSMD12,SFPQ,PSMB10,XRCC6,MATR3,PSMB5,IFI16,PSMD4,PSMA7,PSMB2,SRC,PSMB9,PSMB8,PSME1,XRCC5,SIN3A,PSMD14,PSMC2,PSMD13,PSMC6,PSMD6,PSMD9,PSMC3,PSMB3,MUC13
GO:0002223	Stimulatory c-type lectin receptor signaling pathway	44	111	0.62	3.04e-11	9606.ENSP00000044462,9606.ENSP00000157812,9606.ENSP00000210313,9606.ENSP00000215071,9606.ENSP00000216455,9606.ENSP00000216802,9606.ENSP00000217958,9606.ENSP00000219313,9606.ENSP00000223321,9606.ENSP00000226574,9606.ENSP00000256078,9606.ENSP00000259457,9606.ENSP00000261303,9606.ENSP00000261479,9606.ENSP00000261712,9606.ENSP00000262193,9606.ENSP00000264639,9606.ENSP00000271308,9606.ENSP00000290541,…	PSMA4,PSMC4,PSMD5,PSMD8,PSMA3,PSME2,PSMD10,PSMD7,PSMA2,NFKB1,KRAS,PSMB7,PSMC1,PSMA6,PSMD11,PSMB1,PSMD3,PSMA5,PSMB4,PSME3,PSMD1,PSMD2,PSMC5,PAK2,PSMF1,PSMD12,PSMB10,PSMB5,PSMD4,PSMA7,PSMB2,SRC,PSMB9,PSMB8,PSME1,PSMD14,PSMC2,PSMD13,PSMC6,PSMD6,PSMD9,PSMC3,PSMB3,MUC13
GO:1903312	Negative regulation of mrna metabolic process	33	85	0.62	2.6e-08	9606.ENSP00000221419,9606.ENSP00000225698,9606.ENSP00000228251,9606.ENSP00000229390,9606.ENSP00000229795,9606.ENSP00000240185,9606.ENSP00000244020,9606.ENSP00000254108,9606.ENSP00000262710,9606.ENSP00000283179,9606.ENSP00000302768,9606.ENSP00000307863,9606.ENSP00000313007,9606.ENSP00000313199,9606.ENSP00000316042,9606.ENSP00000325905,9606.ENSP00000336721,9606.ENSP00000346634,9606.ENSP00000346694,…	HNRNPL,C1QBP,YBX3,SRSF9,MAPK14,TARDBP,SRSF6,FUS,ACIN1,HNRNPU,PAIP1,U2AF2,PABPC1,HNRNPD,HNRNPA0,SRSF7,LARP1,THRAP3,HNRNPA2B1,PTBP1,DHX9,SYNCRIP,FMR1,RBMX,YBX1,HNRNPK,ELAVL1,PTBP3,SRSF10,HNRNPC,RNPS1,TAF15,SAP18
GO:1900182	Positive regulation of protein localization to nucleus	32	82	0.62	4.14e-08	9606.ENSP00000215832,9606.ENSP00000219169,9606.ENSP00000229795,9606.ENSP00000240185,9606.ENSP00000253024,9606.ENSP00000256644,9606.ENSP00000258091,9606.ENSP00000261574,9606.ENSP00000261769,9606.ENSP00000275603,9606.ENSP00000280326,9606.ENSP00000286788,9606.ENSP00000295688,9606.ENSP00000296161,9606.ENSP00000299300,9606.ENSP00000317334,9606.ENSP00000320176,9606.ENSP00000352264,9606.ENSP00000353224,…	MAPK1,NUTF2,MAPK14,TARDBP,TRIM28,LAMTOR5,CCT7,IPO5,CDH1,CCT6A,CCT5,CCT8,CCT3,DTX3L,CCT2,TCP1,HCLS1,CD2AP,TFRC,PARP1,TPR,BAG3,DKC1,FLNA,HSP90AB1,SRC,JUP,CCT4,CDK1,PARK7,CDK5RAP3,RAN
GO:0009060	Aerobic respiration	31	79	0.62	6.54e-08	9606.ENSP00000203407,9606.ENSP00000205402,9606.ENSP00000215375,9606.ENSP00000216254,9606.ENSP00000217901,9606.ENSP00000246554,9606.ENSP00000264932,9606.ENSP00000280346,9606.ENSP00000299518,9606.ENSP00000307241,9606.ENSP00000307786,9606.ENSP00000309477,9606.ENSP00000309565,9606.ENSP00000315774,9606.ENSP00000321070,9606.ENSP00000327070,9606.ENSP00000331897,9606.ENSP00000342056,9606.ENSP00000354876,…	UQCRC1,DLD,ATP5D,ACO2,IDH3G,COX6B1,SDHA,DLAT,IDH3A,PDHB,CYCS,ACO1,UQCRH,NDUFS8,ME2,MDH2,IDH2,CS,MT-CO2,MT-ND4,FH,SDHB,SUCLA2,IDH3B,FAHD1,IDH1,SUCLG2,COX6C,UQCRB,COX4I1,ADSL
GO:0042273	Ribosomal large subunit biogenesis	28	72	0.62	4.25e-07	9606.ENSP00000259469,9606.ENSP00000263239,9606.ENSP00000296930,9606.ENSP00000309830,9606.ENSP00000315017,9606.ENSP00000317992,9606.ENSP00000322396,9606.ENSP00000339795,9606.ENSP00000346001,9606.ENSP00000346725,9606.ENSP00000354040,9606.ENSP00000354739,9606.ENSP00000359345,9606.ENSP00000361076,9606.ENSP00000363018,9606.ENSP00000363574,9606.ENSP00000363676,9606.ENSP00000371858,9606.ENSP00000377640,…	RPL35,DDX18,NPM1,RPL38,MRPL1,NOC2L,RRS1,RPL7,RPL3,PES1,GTPBP4,RPL12,RPL5,RPL7A,RPL10A,EIF6,RPL11,NOP2,RPL24,RPL14,NHP2L1,RPL23A,RPL6,RPL10,RPL35A,RPLP0,RSL1D1,RPL26
GO:0009144	Purine nucleoside triphosphate metabolic process	27	69	0.62	6.73e-07	9606.ENSP00000215375,9606.ENSP00000216044,9606.ENSP00000219302,9606.ENSP00000262030,9606.ENSP00000262878,9606.ENSP00000286621,9606.ENSP00000290299,9606.ENSP00000300688,9606.ENSP00000301587,9606.ENSP00000317159,9606.ENSP00000320171,9606.ENSP00000321584,9606.ENSP00000337060,9606.ENSP00000348886,9606.ENSP00000349142,9606.ENSP00000358737,9606.ENSP00000358867,9606.ENSP00000369456,9606.ENSP00000371230,…	ATP5D,GTPBP1,NME3,ATP5B,SAMHD1,ADK,ATP5O,ATP5L,ATP5H,CYC1,PKM,IMPDH2,NME1,STOML2,ATP5C1,ATP5F1,GNAI3,ITPA,AK3,NME1-NME2,ATP5A1,ATP5J,SLC25A13,RHOA,RAB23,NUDT16,RAN
GO:0009205	Purine ribonucleoside triphosphate metabolic process	24	61	0.62	3.44e-06	9606.ENSP00000215375,9606.ENSP00000216044,9606.ENSP00000219302,9606.ENSP00000262030,9606.ENSP00000290299,9606.ENSP00000300688,9606.ENSP00000301587,9606.ENSP00000317159,9606.ENSP00000320171,9606.ENSP00000321584,9606.ENSP00000337060,9606.ENSP00000348886,9606.ENSP00000349142,9606.ENSP00000358737,9606.ENSP00000358867,9606.ENSP00000369456,9606.ENSP00000371230,9606.ENSP00000376886,9606.ENSP00000381736,…	ATP5D,GTPBP1,NME3,ATP5B,ATP5O,ATP5L,ATP5H,CYC1,PKM,IMPDH2,NME1,STOML2,ATP5C1,ATP5F1,GNAI3,ITPA,AK3,NME1-NME2,ATP5A1,ATP5J,SLC25A13,RHOA,RAB23,RAN
GO:0006635	Fatty acid beta-oxidation	22	56	0.62	1.1e-05	9606.ENSP00000220764,9606.ENSP00000221418,9606.ENSP00000242592,9606.ENSP00000265641,9606.ENSP00000265838,9606.ENSP00000285093,9606.ENSP00000293217,9606.ENSP00000301729,9606.ENSP00000325136,9606.ENSP00000333664,9606.ENSP00000346173,9606.ENSP00000356015,9606.ENSP00000357535,9606.ENSP00000359233,9606.ENSP00000360541,9606.ENSP00000360569,9606.ENSP00000371517,9606.ENSP00000418397,9606.ENSP00000420914,…	DECR1,ECH1,ACADS,CPT1A,ACAT1,ACAA2,ACOX1,ECI1,HADHB,ACAA1,ETFB,ACAT2,ECHS1,ABCD3,CPT2,SCP2,AMACR,IVD,HSD17B4,ECHDC1,ETFA,HADH
GO:0097064	ncRNA export from nucleus	15	38	0.62	0.00052	9606.ENSP00000245544,9606.ENSP00000254508,9606.ENSP00000261396,9606.ENSP00000283195,9606.ENSP00000285968,9606.ENSP00000296930,9606.ENSP00000310668,9606.ENSP00000327821,9606.ENSP00000356448,9606.ENSP00000367721,9606.ENSP00000373312,9606.ENSP00000379182,9606.ENSP00000386636,9606.ENSP00000446215,9606.ENSP00000471191	NUP85,NUP210,NUP133,RANBP2,NUP205,NPM1,NUP93,XPOT,TPR,NUP160,SEC13,RAE1,SSB,RAN,NUP62
GO:0033120	Positive regulation of rna splicing	14	36	0.62	0.001	9606.ENSP00000227524,9606.ENSP00000233078,9606.ENSP00000261531,9606.ENSP00000297071,9606.ENSP00000307863,9606.ENSP00000318195,9606.ENSP00000342026,9606.ENSP00000346634,9606.ENSP00000359645,9606.ENSP00000364289,9606.ENSP00000365950,9606.ENSP00000416959,9606.ENSP00000432083,9606.ENSP00000480158	PRPF19,DAZAP1,SNW1,TRA2A,U2AF2,NCL,PRDX6,THRAP3,RBMX,NCBP1,RBM3,TRA2B,HSPA8,POLR2A
GO:0000380	Alternative mrna splicing, via spliceosome	7	18	0.62	0.0467	9606.ENSP00000244020,9606.ENSP00000258962,9606.ENSP00000325376,9606.ENSP00000349748,9606.ENSP00000356520,9606.ENSP00000380033,9606.ENSP00000434359	SRSF6,SRSF1,HNRNPM,SFPQ,DHX9,DDX17,PUF60
GO:0030970	Retrograde protein transport, er to cytosol	7	18	0.62	0.0467	9606.ENSP00000223641,9606.ENSP00000261942,9606.ENSP00000263202,9606.ENSP00000299767,9606.ENSP00000331487,9606.ENSP00000351777,9606.ENSP00000381237	SEC61B,FAF2,UFD1L,HSP90B1,NPLOC4,VCP,HM13
GO:0042026	Protein refolding	7	18	0.62	0.0467	9606.ENSP00000297185,9606.ENSP00000314030,9606.ENSP00000335153,9606.ENSP00000373620,9606.ENSP00000383003,9606.ENSP00000432083,9606.ENSP00000452780	HSPA9,DNAJA2,HSP90AA1,HSPD1,FKBP1A,HSPA8,B2M
GO:2000811	Negative regulation of anoikis	7	18	0.62	0.0467	9606.ENSP00000199764,9606.ENSP00000221992,9606.ENSP00000293379,9606.ENSP00000339191,9606.ENSP00000341189,9606.ENSP00000362680,9606.ENSP00000379350	CEACAM6,CEACAM5,ITGA5,CAV1,PTK2,SRC,ITGB1
GO:0043604	Amide biosynthetic process	198	512	0.61	2e-50	9606.ENSP00000081029,9606.ENSP00000205402,9606.ENSP00000215882,9606.ENSP00000216044,9606.ENSP00000216190,9606.ENSP00000216554,9606.ENSP00000216605,9606.ENSP00000216951,9606.ENSP00000220592,9606.ENSP00000220849,9606.ENSP00000222247,9606.ENSP00000223029,9606.ENSP00000225430,9606.ENSP00000225729,9606.ENSP00000229416,9606.ENSP00000230050,9606.ENSP00000234677,9606.ENSP00000236959,9606.ENSP00000245539,…	MRPS35,DLD,SLC25A1,GTPBP1,EIF3D,EIF5,MTHFD1,GSS,AGO2,EIF3E,RPL18A,AIMP2,RPL19,DRG2,GCLC,RPS12,SARS,ATIC,MRPS7,EIF3K,RPS16,EIF2S3,MRPL4,EIF3G,ACSS2,ACLY,PTCD3,EIF2S1,MRPS36,NARS,MRPL44,MRPS9,RPL35,AARS,EIF3J,MARS,RPL8,DARS,EIF4H,ACAT1,RPS11,RPS27A,GGCT,HSD17B12,RPS3,MRPL49,DLAT,FARSB,EIF5B,EIF4A1,APEH,ABCE1,RPS23,GCN1L1,PAIP1,RPS9,CBR4,MRPL39,PDHB,QARS,RPL13,EEF2,RPL15,RPL38,RPL4,PABPC1,ABCF1,TSFM…
GO:2000736	Regulation of stem cell differentiation	46	119	0.61	1.89e-11	9606.ENSP00000044462,9606.ENSP00000157812,9606.ENSP00000210313,9606.ENSP00000215071,9606.ENSP00000216455,9606.ENSP00000216802,9606.ENSP00000217958,9606.ENSP00000219313,9606.ENSP00000223321,9606.ENSP00000259457,9606.ENSP00000261303,9606.ENSP00000261479,9606.ENSP00000261712,9606.ENSP00000262193,9606.ENSP00000264639,9606.ENSP00000264670,9606.ENSP00000271308,9606.ENSP00000283179,9606.ENSP00000290541,…	PSMA4,PSMC4,PSMD5,PSMD8,PSMA3,PSME2,PSMD10,PSMD7,PSMA2,PSMB7,PSMC1,PSMA6,PSMD11,PSMB1,PSMD3,NSUN2,PSMA5,HNRNPU,PSMB4,PSME3,HSPA9,NUDT21,PSMD1,PSMD2,PSMC5,PRKDC,PSMF1,PSMD12,PUS7,PSMB10,PSMB5,PSMD4,PSMA7,PSMB2,PSMB9,PSMB8,OCIAD1,PSME1,PSMD14,PSMC2,PSMD13,PSMC6,PSMD6,PSMD9,PSMC3,PSMB3
GO:0046364	Monosaccharide biosynthetic process	21	55	0.61	2.7e-05	9606.ENSP00000215882,9606.ENSP00000216780,9606.ENSP00000225665,9606.ENSP00000226253,9606.ENSP00000229239,9606.ENSP00000229270,9606.ENSP00000234590,9606.ENSP00000245206,9606.ENSP00000267814,9606.ENSP00000308610,9606.ENSP00000321259,9606.ENSP00000327070,9606.ENSP00000352779,9606.ENSP00000361140,9606.ENSP00000362413,9606.ENSP00000388658,9606.ENSP00000391481,9606.ENSP00000400101,9606.ENSP00000405573,…	SLC25A1,PCK2,SLC25A11,ALDOC,GAPDH,TPI1,ENO1,GOT2,SORD,GPD2,TALDO1,MDH2,SLC39A14,AKR1A1,PGK1,SLC25A12,TKT,SLC25A13,GPI,FBP1,SLC25A10
GO:0006120	Mitochondrial electron transport, nadh to ubiquinone	19	49	0.61	6.78e-05	9606.ENSP00000184266,9606.ENSP00000205402,9606.ENSP00000252711,9606.ENSP00000262507,9606.ENSP00000263774,9606.ENSP00000268668,9606.ENSP00000299166,9606.ENSP00000315774,9606.ENSP00000322450,9606.ENSP00000327268,9606.ENSP00000330737,9606.ENSP00000354961,9606.ENSP00000362060,9606.ENSP00000362873,9606.ENSP00000389160,9606.ENSP00000392709,9606.ENSP00000417142,9606.ENSP00000423673,9606.ENSP00000458770	NDUFB4,DLD,NDUFA10,COQ9,NDUFS3,NDUFB10,NDUFB8,NDUFS8,NDUFV1,NDUFV2,NDUFA12,MT-ND4,NDUFS5,NDUFA8,NDUFA11,NDUFS1,NDUFA5,NDUFA13,NDUFAB1
GO:0009145	Purine nucleoside triphosphate biosynthetic process	18	47	0.61	0.00013	9606.ENSP00000215375,9606.ENSP00000219302,9606.ENSP00000262030,9606.ENSP00000286621,9606.ENSP00000290299,9606.ENSP00000300688,9606.ENSP00000301587,9606.ENSP00000317159,9606.ENSP00000320171,9606.ENSP00000321584,9606.ENSP00000337060,9606.ENSP00000348886,9606.ENSP00000349142,9606.ENSP00000358737,9606.ENSP00000376886,9606.ENSP00000381736,9606.ENSP00000389649,9606.ENSP00000400101	ATP5D,NME3,ATP5B,ADK,ATP5O,ATP5L,ATP5H,CYC1,PKM,IMPDH2,NME1,STOML2,ATP5C1,ATP5F1,NME1-NME2,ATP5A1,ATP5J,SLC25A13
GO:1904591	Positive regulation of protein import	17	44	0.61	0.00021	9606.ENSP00000215832,9606.ENSP00000219169,9606.ENSP00000229795,9606.ENSP00000240185,9606.ENSP00000253024,9606.ENSP00000261574,9606.ENSP00000261769,9606.ENSP00000284981,9606.ENSP00000320176,9606.ENSP00000356448,9606.ENSP00000358081,9606.ENSP00000358866,9606.ENSP00000360609,9606.ENSP00000377508,9606.ENSP00000378699,9606.ENSP00000446215,9606.ENSP00000466214	MAPK1,NUTF2,MAPK14,TARDBP,TRIM28,IPO5,CDH1,APP,HCLS1,TPR,BAG3,FLNA,HSP90AB1,JUP,CDK1,RAN,PDCD5
GO:0006376	mRNA splice site selection	13	34	0.61	0.002	9606.ENSP00000215793,9606.ENSP00000229390,9606.ENSP00000244020,9606.ENSP00000258962,9606.ENSP00000347005,9606.ENSP00000359645,9606.ENSP00000362110,9606.ENSP00000366604,9606.ENSP00000370109,9606.ENSP00000420195,9606.ENSP00000425092,9606.ENSP00000434359,9606.ENSP00000443926	SF3A1,SRSF9,SRSF6,SRSF1,CGI-74,RBMX,SF3A3,SF1,PSIP1,SRSF10,LUC7L3,PUF60,CELF2
GO:0015949	Nucleobase-containing small molecule interconversion	12	31	0.61	0.0031	9606.ENSP00000219302,9606.ENSP00000221130,9606.ENSP00000300738,9606.ENSP00000337060,9606.ENSP00000346921,9606.ENSP00000349576,9606.ENSP00000353770,9606.ENSP00000360939,9606.ENSP00000362271,9606.ENSP00000370376,9606.ENSP00000376886,9606.ENSP00000434516	NME3,GSR,RRM1,NME1,AK2,DCTD,RRM2,CMPK1,AK1,DUT,NME1-NME2,TXNRD1
GO:0042407	Cristae formation	12	31	0.61	0.0031	9606.ENSP00000215375,9606.ENSP00000262030,9606.ENSP00000262570,9606.ENSP00000290299,9606.ENSP00000300688,9606.ENSP00000301587,9606.ENSP00000305653,9606.ENSP00000345445,9606.ENSP00000349142,9606.ENSP00000358737,9606.ENSP00000381736,9606.ENSP00000389649	ATP5D,ATP5B,CHCHD3,ATP5O,ATP5L,ATP5H,LETM1,SAMM50,ATP5C1,ATP5F1,ATP5A1,ATP5J
GO:0050690	Regulation of defense response to virus by virus	11	29	0.61	0.0062	9606.ENSP00000250244,9606.ENSP00000292807,9606.ENSP00000314067,9606.ENSP00000327694,9606.ENSP00000348461,9606.ENSP00000349486,9606.ENSP00000350199,9606.ENSP00000352522,9606.ENSP00000377148,9606.ENSP00000452780,9606.ENSP00000482835	AP1M2,AP2M1,PAK2,AP2A2,RAC1,SCRIB,AP1B1,ATP6V1H,AP1G1,B2M,AP2B1
GO:0006541	Glutamine metabolic process	8	21	0.61	0.0302	9606.ENSP00000264705,9606.ENSP00000277865,9606.ENSP00000313490,9606.ENSP00000317379,9606.ENSP00000349860,9606.ENSP00000358417,9606.ENSP00000377696,9606.ENSP00000419851	CAD,GLUD1,PFAS,GLS,GFPT1,PHGDH,NIT2,GMPS
GO:0090150	Establishment of protein localization to membrane	101	267	0.6	1.06e-24	9606.ENSP00000054666,9606.ENSP00000215570,9606.ENSP00000216034,9606.ENSP00000221566,9606.ENSP00000222247,9606.ENSP00000223641,9606.ENSP00000225430,9606.ENSP00000230050,9606.ENSP00000234160,9606.ENSP00000251453,9606.ENSP00000259469,9606.ENSP00000262213,9606.ENSP00000262584,9606.ENSP00000264710,9606.ENSP00000267884,9606.ENSP00000270625,9606.ENSP00000272317,9606.ENSP00000278572,9606.ENSP00000291295,…	VAMP3,TIMM13,TOMM22,SGTA,RPL18A,SEC61B,RPL19,RPS12,GORASP2,RPS16,RPL35,TRAM1,RPL8,RAB10,SRP14,RPS11,RPS27A,RPS3,CALM3,RPS23,VPS35,RAB8A,RPS9,HSPA4,SRP9,ARL6IP1,RPL13,RPL15,RPL38,RPL4,RPS15A,BID,RPLP2,CHMP4A,RAB11B,RFTN1,HSP90AA1,RPS7,RPL7,RPS2,SAMM50,RPS21,RPL3,RPL27A,RPL21,RPS17,RPSA,RPL22,RPS26,SPTBN1,SCRIB,MYO1C,RPL12,ATP1B1,RPS27,SEC63,RPL5,RPL7A,RPS4X,RPL10A,RPL11,BAG6,OPTN,RPS6,MLLT4,RPL24,…
GO:0009199	Ribonucleoside triphosphate metabolic process	25	67	0.6	4.24e-06	9606.ENSP00000215375,9606.ENSP00000216044,9606.ENSP00000219302,9606.ENSP00000262030,9606.ENSP00000264705,9606.ENSP00000290299,9606.ENSP00000300688,9606.ENSP00000301587,9606.ENSP00000317159,9606.ENSP00000320171,9606.ENSP00000321584,9606.ENSP00000337060,9606.ENSP00000348886,9606.ENSP00000349142,9606.ENSP00000358737,9606.ENSP00000358867,9606.ENSP00000369456,9606.ENSP00000371230,9606.ENSP00000376886,…	ATP5D,GTPBP1,NME3,ATP5B,CAD,ATP5O,ATP5L,ATP5H,CYC1,PKM,IMPDH2,NME1,STOML2,ATP5C1,ATP5F1,GNAI3,ITPA,AK3,NME1-NME2,ATP5A1,ATP5J,SLC25A13,RHOA,RAB23,RAN
GO:0006626	Protein targeting to mitochondrion	21	56	0.6	3.37e-05	9606.ENSP00000215570,9606.ENSP00000216034,9606.ENSP00000223136,9606.ENSP00000249269,9606.ENSP00000264954,9606.ENSP00000270538,9606.ENSP00000284320,9606.ENSP00000287295,9606.ENSP00000302961,9606.ENSP00000318822,9606.ENSP00000335153,9606.ENSP00000345445,9606.ENSP00000360782,9606.ENSP00000361900,9606.ENSP00000370377,9606.ENSP00000370808,9606.ENSP00000373620,9606.ENSP00000378588,9606.ENSP00000410339,…	TIMM13,TOMM22,FIS1,PMPCB,GRPEL1,TIMM44,TOMM70A,AIFM1,HSPA4,BID,HSP90AA1,SAMM50,PMPCA,TOMM34,PITRM1,SLC25A6,HSPD1,TIMM9,TOMM40,NDUFA13,TIMM50
GO:0030865	Cortical cytoskeleton organization	20	53	0.6	5.36e-05	9606.ENSP00000248444,9606.ENSP00000249071,9606.ENSP00000263277,9606.ENSP00000298316,9606.ENSP00000307292,9606.ENSP00000316029,9606.ENSP00000317985,9606.ENSP00000320866,9606.ENSP00000336831,9606.ENSP00000338481,9606.ENSP00000343158,9606.ENSP00000345259,9606.ENSP00000348461,9606.ENSP00000356042,9606.ENSP00000376333,9606.ENSP00000380378,9606.ENSP00000382697,9606.ENSP00000383118,9606.ENSP00000411825,…	VIL1,RAC2,EHD2,ARF6,PRKCDBP,TLN1,ROCK2,CALR,PLS1,EPB41L2,EPB41L3,EPB41,RAC1,EZR,LLGL2,PAFAH1B1,ROCK1,CDC42,PDCD6IP,CDK5
GO:0030834	Regulation of actin filament depolymerization	19	51	0.6	0.00011	9606.ENSP00000248444,9606.ENSP00000259365,9606.ENSP00000263168,9606.ENSP00000263867,9606.ENSP00000264758,9606.ENSP00000303908,9606.ENSP00000308753,9606.ENSP00000348381,9606.ENSP00000349259,9606.ENSP00000350018,9606.ENSP00000356257,9606.ENSP00000357129,9606.ENSP00000361824,9606.ENSP00000362924,9606.ENSP00000378400,9606.ENSP00000401010,9606.ENSP00000432660,9606.ENSP00000449428,9606.ENSP00000451752	VIL1,TMOD1,CAPZA1,CAPG,ADD1,TWF2,TMOD3,ADD3,SPTBN1,SH3BP1,LMOD1,SPTA1,SPTAN1,GSN,LIMA1,CAPZB,CFL1,TWF1,SPTB
GO:0032206	Positive regulation of telomere maintenance	19	51	0.6	0.00011	9606.ENSP00000215832,9606.ENSP00000258091,9606.ENSP00000263025,9606.ENSP00000268058,9606.ENSP00000275603,9606.ENSP00000280326,9606.ENSP00000286788,9606.ENSP00000295688,9606.ENSP00000299300,9606.ENSP00000313199,9606.ENSP00000317334,9606.ENSP00000325863,9606.ENSP00000341826,9606.ENSP00000344456,9606.ENSP00000346694,9606.ENSP00000358563,9606.ENSP00000368100,9606.ENSP00000375978,9606.ENSP00000377958	MAPK1,CCT7,MAPK3,PML,CCT6A,CCT5,CCT8,CCT3,CCT2,HNRNPD,TCP1,MRE11A,HNRNPA1,CTNNB1,HNRNPA2B1,DKC1,RAD50,XRCC5,CCT4
GO:0007007	Inner mitochondrial membrane organization	18	48	0.6	0.00017	9606.ENSP00000215375,9606.ENSP00000215570,9606.ENSP00000249442,9606.ENSP00000262030,9606.ENSP00000262570,9606.ENSP00000290299,9606.ENSP00000297185,9606.ENSP00000300688,9606.ENSP00000301587,9606.ENSP00000305653,9606.ENSP00000345445,9606.ENSP00000349142,9606.ENSP00000357360,9606.ENSP00000358737,9606.ENSP00000378588,9606.ENSP00000381736,9606.ENSP00000389649,9606.ENSP00000423673	ATP5D,TIMM13,MTX2,ATP5B,CHCHD3,ATP5O,HSPA9,ATP5L,ATP5H,LETM1,SAMM50,ATP5C1,MTX1,ATP5F1,TIMM9,ATP5A1,ATP5J,NDUFA13
GO:0048255	mRNA stabilization	17	45	0.6	0.00027	9606.ENSP00000228251,9606.ENSP00000229795,9606.ENSP00000240185,9606.ENSP00000254108,9606.ENSP00000283179,9606.ENSP00000302768,9606.ENSP00000313007,9606.ENSP00000313199,9606.ENSP00000316042,9606.ENSP00000336721,9606.ENSP00000346634,9606.ENSP00000356520,9606.ENSP00000358635,9606.ENSP00000361626,9606.ENSP00000385269,9606.ENSP00000451291,9606.ENSP00000474096	YBX3,MAPK14,TARDBP,FUS,HNRNPU,PAIP1,PABPC1,HNRNPD,HNRNPA0,LARP1,THRAP3,DHX9,SYNCRIP,YBX1,ELAVL1,HNRNPC,TAF15
GO:0006734	NADH metabolic process	14	37	0.6	0.0013	9606.ENSP00000226253,9606.ENSP00000229239,9606.ENSP00000229270,9606.ENSP00000234590,9606.ENSP00000269848,9606.ENSP00000282541,9606.ENSP00000290573,9606.ENSP00000308610,9606.ENSP00000312250,9606.ENSP00000320171,9606.ENSP00000327070,9606.ENSP00000351777,9606.ENSP00000362413,9606.ENSP00000405573	ALDOC,GAPDH,TPI1,ENO1,PFKL,GPD1L,HK2,GPD2,ADPGK,PKM,MDH2,VCP,PGK1,GPI
GO:0006754	ATP biosynthetic process	13	35	0.6	0.0025	9606.ENSP00000215375,9606.ENSP00000262030,9606.ENSP00000290299,9606.ENSP00000300688,9606.ENSP00000301587,9606.ENSP00000317159,9606.ENSP00000320171,9606.ENSP00000348886,9606.ENSP00000349142,9606.ENSP00000358737,9606.ENSP00000381736,9606.ENSP00000389649,9606.ENSP00000400101	ATP5D,ATP5B,ATP5O,ATP5L,ATP5H,CYC1,PKM,STOML2,ATP5C1,ATP5F1,ATP5A1,ATP5J,SLC25A13
GO:0016032	Viral process	286	776	0.59	1.06e-70	9606.ENSP00000044462,9606.ENSP00000209875,9606.ENSP00000215832,9606.ENSP00000216190,9606.ENSP00000216297,9606.ENSP00000216455,9606.ENSP00000216479,9606.ENSP00000221566,9606.ENSP00000222247,9606.ENSP00000225430,9606.ENSP00000225698,9606.ENSP00000225777,9606.ENSP00000230050,9606.ENSP00000234420,9606.ENSP00000238497,9606.ENSP00000245544,9606.ENSP00000247461,9606.ENSP00000249923,9606.ENSP00000250244,…	PSMA4,CBX5,MAPK1,EIF3D,SUPT16H,PSMA3,AHSA1,SGTA,RPL18A,RPL19,C1QBP,SYNGR2,RPS12,MSH6,VPS4B,NUP85,CANX,COPB1,AP1M2,RPS16,TSG101,APOE,TRIM28,EIF3G,NUP210,LAMTOR5,PSMB7,RPL35,ITGAV,NUP133,SNW1,IPO5,KPNA3,C14orf166,PSMB1,TRAM1,TCEB2,RPL8,SAMHD1,MAPK3,YWHAE,RAB7A,AMBP,VDAC1,XPO5,EIF4H,IDE,PML,IQGAP1,RPS11,RPS27A,RAB5A,DYNC1LI1,SSRP1,RPS3,SLC25A4,HNRNPU,RANBP2,NUP205,KPNB1,PSMB4,CTBP1,CALM3,AP2M1,PSME3…
GO:0008380	RNA splicing	146	396	0.59	6.62e-35	9606.ENSP00000215793,9606.ENSP00000215829,9606.ENSP00000216038,9606.ENSP00000216252,9606.ENSP00000216832,9606.ENSP00000217109,9606.ENSP00000221419,9606.ENSP00000225698,9606.ENSP00000227524,9606.ENSP00000228284,9606.ENSP00000229390,9606.ENSP00000230640,9606.ENSP00000235090,9606.ENSP00000238112,9606.ENSP00000240185,9606.ENSP00000243563,9606.ENSP00000244020,9606.ENSP00000245838,9606.ENSP00000246071,…	SF3A1,SNRPD3,RTCB,PHF5A,PNN,CSTF1,HNRNPL,C1QBP,PRPF19,SART3,SRSF9,SKIV2L2,WDR77,CPSF3,TARDBP,SNRPA,SRSF6,THOC2,SNRPB2,RALY,LSM8,LSM7,RBM39,FUS,SNRPA1,LGALS3,SRSF1,SNW1,C14orf166,RBM25,ACIN1,DCPS,SNRNP40,DNAJC8,HNRNPH3,CCAR1,PRPF6,EIF4A3,NONO,MBNL1,HNRNPU,U2AFBP,RAVER1,TRA2A,NUDT21,SNRPD1,SRRM2,PCBP1,SF3B3,PPIH,U2AF2,SART1,CCAR2,PPP1R8,USP39,PABPC1,HNRNPD,HNRNPA0,SNRNP200,SF3B2,PRMT5,PRPF31,PPP2R1…
GO:0043484	Regulation of rna splicing	56	152	0.59	3.36e-13	9606.ENSP00000221419,9606.ENSP00000225698,9606.ENSP00000227524,9606.ENSP00000228284,9606.ENSP00000229390,9606.ENSP00000233078,9606.ENSP00000244020,9606.ENSP00000253363,9606.ENSP00000254108,9606.ENSP00000258962,9606.ENSP00000261531,9606.ENSP00000261973,9606.ENSP00000262710,9606.ENSP00000265866,9606.ENSP00000282486,9606.ENSP00000283179,9606.ENSP00000297071,9606.ENSP00000307863,9606.ENSP00000313829,…	HNRNPL,C1QBP,PRPF19,SART3,SRSF9,DAZAP1,SRSF6,RBM39,FUS,SRSF1,SNW1,RBM25,ACIN1,HNRNPH3,MBNL1,HNRNPU,TRA2A,U2AF2,KHDRBS1,NCL,SRSF7,HNRNPA1,PRDX6,THRAP3,HNRNPA2B1,RPS26,HNRNPH1,PTBP1,FXR1,FMR1,RBMX,MAGOH,HNRNPH2,SRSF3,SRPK1,NCBP1,HNRNPK,RBM3,SF1,SRSF2,DDX17,SMU1,RBM4,HNRNPF,ESRP1,PTBP3,TRA2B,SRSF10,HSPA8,PUF60,RPS13,CELF2,RNPS1,RBM8A,POLR2A,SAP18
GO:0050684	Regulation of mrna processing	55	149	0.59	5.38e-13	9606.ENSP00000221419,9606.ENSP00000225698,9606.ENSP00000227524,9606.ENSP00000228284,9606.ENSP00000229390,9606.ENSP00000233078,9606.ENSP00000243563,9606.ENSP00000244020,9606.ENSP00000253363,9606.ENSP00000258962,9606.ENSP00000261531,9606.ENSP00000261973,9606.ENSP00000262710,9606.ENSP00000266679,9606.ENSP00000282486,9606.ENSP00000283179,9606.ENSP00000297071,9606.ENSP00000300291,9606.ENSP00000307863,…	HNRNPL,C1QBP,PRPF19,SART3,SRSF9,DAZAP1,SNRPA,SRSF6,RBM39,SRSF1,SNW1,RBM25,ACIN1,CPSF6,MBNL1,HNRNPU,TRA2A,NUDT21,U2AF2,KHDRBS1,NCL,SRSF7,HNRNPA1,PRDX6,CPSF7,THRAP3,HNRNPA2B1,PTBP1,FXR1,DHX9,AHCYL1,FMR1,RBMX,MAGOH,SRSF3,SRPK1,NCBP1,HNRNPK,RBM3,SF1,SRSF2,DDX17,SMU1,RBM4,PTBP3,TRA2B,SRSF10,HSPA8,PUF60,CELF2,RNPS1,RBM8A,CDK11B,SAFB,SAP18
GO:0071166	Ribonucleoprotein complex localization	46	126	0.59	9.15e-11	9606.ENSP00000229390,9606.ENSP00000238112,9606.ENSP00000244020,9606.ENSP00000245544,9606.ENSP00000245838,9606.ENSP00000254508,9606.ENSP00000258962,9606.ENSP00000261396,9606.ENSP00000269349,9606.ENSP00000283195,9606.ENSP00000285968,9606.ENSP00000288071,9606.ENSP00000291552,9606.ENSP00000296577,9606.ENSP00000296930,9606.ENSP00000306117,9606.ENSP00000307863,9606.ENSP00000310668,9606.ENSP00000322396,…	SRSF9,CPSF3,SRSF6,NUP85,THOC2,NUP210,SRSF1,NUP133,EIF4A3,RANBP2,NUP205,DDX19B,U2AFBP,ABCE1,NPM1,DDX19A,U2AF2,NUP93,RRS1,PRPF31,SRSF7,SRRM1,XPOT,EIF5A,SARNP,HNRNPA2B1,TPR,SRSF11,MAGOH,SRSF3,EIF6,NCBP1,NUP160,SEC13,SRSF2,RAE1,DDX39B,XPO1,SSB,ALYREF,RAN,RNPS1,RBM8A,UPF1,NUP62,CPSF1
GO:0022904	Respiratory electron transport chain	39	107	0.59	3.87e-09	9606.ENSP00000184266,9606.ENSP00000203407,9606.ENSP00000205402,9606.ENSP00000246554,9606.ENSP00000252711,9606.ENSP00000262507,9606.ENSP00000263774,9606.ENSP00000264932,9606.ENSP00000268668,9606.ENSP00000296597,9606.ENSP00000299166,9606.ENSP00000307786,9606.ENSP00000308610,9606.ENSP00000309565,9606.ENSP00000315774,9606.ENSP00000317159,9606.ENSP00000318822,9606.ENSP00000322450,9606.ENSP00000327268,…	NDUFB4,UQCRC1,DLD,COX6B1,NDUFA10,COQ9,NDUFS3,SDHA,NDUFB10,NDUFAF2,NDUFB8,CYCS,GPD2,UQCRH,NDUFS8,CYC1,BID,NDUFV1,NDUFV2,NDUFA12,ETFB,MT-CO2,MT-ND4,COA6,NDUFS5,NDUFA8,SDHB,MYBBP1A,SLC25A12,NDUFA11,NDUFS1,SLC25A13,NDUFA5,NDUFA13,COX6C,UQCRB,ETFA,COX4I1,NDUFAB1
GO:1900034	Regulation of cellular response to heat	29	79	0.59	6.45e-07	9606.ENSP00000001008,9606.ENSP00000215832,9606.ENSP00000245544,9606.ENSP00000254322,9606.ENSP00000254508,9606.ENSP00000254719,9606.ENSP00000261396,9606.ENSP00000263025,9606.ENSP00000264335,9606.ENSP00000281938,9606.ENSP00000283195,9606.ENSP00000285968,9606.ENSP00000310668,9606.ENSP00000310670,9606.ENSP00000318687,9606.ENSP00000319255,9606.ENSP00000335153,9606.ENSP00000356448,9606.ENSP00000358081,…	FKBP4,MAPK1,NUP85,DNAJB1,NUP210,RPA1,NUP133,MAPK3,YWHAE,HSPB8,RANBP2,NUP205,NUP93,CCAR2,HSPH1,CHORDC1,HSP90AA1,TPR,BAG3,BAG2,HSP90AB1,RPA2,NUP160,SEC13,RAE1,HSBP1,HSPA8,CRYAB,NUP62
GO:0044766	Multi-organism transport	22	60	0.59	2.62e-05	9606.ENSP00000245544,9606.ENSP00000251968,9606.ENSP00000254508,9606.ENSP00000261396,9606.ENSP00000261667,9606.ENSP00000265062,9606.ENSP00000272317,9606.ENSP00000283195,9606.ENSP00000285968,9606.ENSP00000290158,9606.ENSP00000310668,9606.ENSP00000339191,9606.ENSP00000356448,9606.ENSP00000362728,9606.ENSP00000366565,9606.ENSP00000367721,9606.ENSP00000373312,9606.ENSP00000379182,9606.ENSP00000384863,…	NUP85,TSG101,NUP210,NUP133,KPNA3,RAB7A,RPS27A,RANBP2,NUP205,KPNB1,NUP93,CAV1,TPR,KPNA6,VPS28,NUP160,SEC13,RAE1,XPO1,UBA52,RAN,NUP62
GO:0046794	Transport of virus	21	58	0.59	5.16e-05	9606.ENSP00000245544,9606.ENSP00000251968,9606.ENSP00000254508,9606.ENSP00000261396,9606.ENSP00000261667,9606.ENSP00000272317,9606.ENSP00000283195,9606.ENSP00000285968,9606.ENSP00000290158,9606.ENSP00000310668,9606.ENSP00000339191,9606.ENSP00000356448,9606.ENSP00000362728,9606.ENSP00000366565,9606.ENSP00000367721,9606.ENSP00000373312,9606.ENSP00000379182,9606.ENSP00000384863,9606.ENSP00000388107,…	NUP85,TSG101,NUP210,NUP133,KPNA3,RPS27A,RANBP2,NUP205,KPNB1,NUP93,CAV1,TPR,KPNA6,VPS28,NUP160,SEC13,RAE1,XPO1,UBA52,RAN,NUP62
GO:0075733	Intracellular transport of virus	20	54	0.59	6.62e-05	9606.ENSP00000245544,9606.ENSP00000251968,9606.ENSP00000254508,9606.ENSP00000261396,9606.ENSP00000261667,9606.ENSP00000272317,9606.ENSP00000283195,9606.ENSP00000285968,9606.ENSP00000290158,9606.ENSP00000310668,9606.ENSP00000356448,9606.ENSP00000362728,9606.ENSP00000366565,9606.ENSP00000367721,9606.ENSP00000373312,9606.ENSP00000379182,9606.ENSP00000384863,9606.ENSP00000388107,9606.ENSP00000446215,…	NUP85,TSG101,NUP210,NUP133,KPNA3,RPS27A,RANBP2,NUP205,KPNB1,NUP93,TPR,KPNA6,VPS28,NUP160,SEC13,RAE1,XPO1,UBA52,RAN,NUP62
GO:0043489	RNA stabilization	19	52	0.59	0.00013	9606.ENSP00000228251,9606.ENSP00000229795,9606.ENSP00000240185,9606.ENSP00000254108,9606.ENSP00000264670,9606.ENSP00000283179,9606.ENSP00000302768,9606.ENSP00000313007,9606.ENSP00000313199,9606.ENSP00000316042,9606.ENSP00000336721,9606.ENSP00000346634,9606.ENSP00000356520,9606.ENSP00000358563,9606.ENSP00000358635,9606.ENSP00000361626,9606.ENSP00000385269,9606.ENSP00000451291,9606.ENSP00000474096	YBX3,MAPK14,TARDBP,FUS,NSUN2,HNRNPU,PAIP1,PABPC1,HNRNPD,HNRNPA0,LARP1,THRAP3,DHX9,DKC1,SYNCRIP,YBX1,ELAVL1,HNRNPC,TAF15
GO:0019319	Hexose biosynthetic process	18	49	0.59	0.00021	9606.ENSP00000215882,9606.ENSP00000216780,9606.ENSP00000225665,9606.ENSP00000226253,9606.ENSP00000229239,9606.ENSP00000229270,9606.ENSP00000234590,9606.ENSP00000245206,9606.ENSP00000267814,9606.ENSP00000308610,9606.ENSP00000327070,9606.ENSP00000352779,9606.ENSP00000362413,9606.ENSP00000388658,9606.ENSP00000400101,9606.ENSP00000405573,9606.ENSP00000408025,9606.ENSP00000446242	SLC25A1,PCK2,SLC25A11,ALDOC,GAPDH,TPI1,ENO1,GOT2,SORD,GPD2,MDH2,SLC39A14,PGK1,SLC25A12,SLC25A13,GPI,FBP1,SLC25A10
GO:0006094	Gluconeogenesis	17	46	0.59	0.00033	9606.ENSP00000215882,9606.ENSP00000216780,9606.ENSP00000225665,9606.ENSP00000226253,9606.ENSP00000229239,9606.ENSP00000229270,9606.ENSP00000234590,9606.ENSP00000245206,9606.ENSP00000308610,9606.ENSP00000327070,9606.ENSP00000352779,9606.ENSP00000362413,9606.ENSP00000388658,9606.ENSP00000400101,9606.ENSP00000405573,9606.ENSP00000408025,9606.ENSP00000446242	SLC25A1,PCK2,SLC25A11,ALDOC,GAPDH,TPI1,ENO1,GOT2,GPD2,MDH2,SLC39A14,PGK1,SLC25A12,SLC25A13,GPI,FBP1,SLC25A10
GO:0009206	Purine ribonucleoside triphosphate biosynthetic process	17	46	0.59	0.00033	9606.ENSP00000215375,9606.ENSP00000219302,9606.ENSP00000262030,9606.ENSP00000290299,9606.ENSP00000300688,9606.ENSP00000301587,9606.ENSP00000317159,9606.ENSP00000320171,9606.ENSP00000321584,9606.ENSP00000337060,9606.ENSP00000348886,9606.ENSP00000349142,9606.ENSP00000358737,9606.ENSP00000376886,9606.ENSP00000381736,9606.ENSP00000389649,9606.ENSP00000400101	ATP5D,NME3,ATP5B,ATP5O,ATP5L,ATP5H,CYC1,PKM,IMPDH2,NME1,STOML2,ATP5C1,ATP5F1,NME1-NME2,ATP5A1,ATP5J,SLC25A13
GO:0042307	Positive regulation of protein import into nucleus	15	41	0.59	0.00099	9606.ENSP00000215832,9606.ENSP00000219169,9606.ENSP00000229795,9606.ENSP00000240185,9606.ENSP00000253024,9606.ENSP00000261574,9606.ENSP00000261769,9606.ENSP00000320176,9606.ENSP00000356448,9606.ENSP00000358081,9606.ENSP00000358866,9606.ENSP00000360609,9606.ENSP00000377508,9606.ENSP00000378699,9606.ENSP00000446215	MAPK1,NUTF2,MAPK14,TARDBP,TRIM28,IPO5,CDH1,HCLS1,TPR,BAG3,FLNA,HSP90AB1,JUP,CDK1,RAN
GO:0006891	intra-Golgi vesicle-mediated transport	12	33	0.59	0.0048	9606.ENSP00000037243,9606.ENSP00000225724,9606.ENSP00000249923,9606.ENSP00000258654,9606.ENSP00000263354,9606.ENSP00000311449,9606.ENSP00000325002,9606.ENSP00000329419,9606.ENSP00000357048,9606.ENSP00000381293,9606.ENSP00000402346,9606.ENSP00000449270	GABARAPL2,GOSR1,COPB1,COG3,NAPA,RAB6A,COPG1,COPB2,COPA,NSF,COPG2,COPZ1
GO:1902745	Positive regulation of lamellipodium organization	12	33	0.59	0.0048	9606.ENSP00000248444,9606.ENSP00000249071,9606.ENSP00000263238,9606.ENSP00000303908,9606.ENSP00000348461,9606.ENSP00000362680,9606.ENSP00000367220,9606.ENSP00000373905,9606.ENSP00000377471,9606.ENSP00000383118,9606.ENSP00000394496,9606.ENSP00000483313	VIL1,RAC2,ACTR3,TWF2,RAC1,SRC,ACTR2,DNM2,CORO1B,CDC42,CORO1C,WASF2
GO:0061621	Canonical glycolysis	10	27	0.59	0.0121	9606.ENSP00000226253,9606.ENSP00000229239,9606.ENSP00000229270,9606.ENSP00000234590,9606.ENSP00000269848,9606.ENSP00000290573,9606.ENSP00000312250,9606.ENSP00000320171,9606.ENSP00000362413,9606.ENSP00000405573	ALDOC,GAPDH,TPI1,ENO1,PFKL,HK2,ADPGK,PKM,PGK1,GPI
GO:1903649	Regulation of cytoplasmic transport	10	27	0.59	0.0121	9606.ENSP00000215832,9606.ENSP00000230085,9606.ENSP00000260818,9606.ENSP00000263025,9606.ENSP00000302486,9606.ENSP00000353408,9606.ENSP00000356042,9606.ENSP00000362680,9606.ENSP00000395083,9606.ENSP00000481314	MAPK1,SNX3,DNAJC13,MAPK3,MAP2K1,MSN,EZR,SRC,ARFIP1,SNX12
GO:0032069	Regulation of nuclease activity	8	22	0.59	0.0369	9606.ENSP00000278572,9606.ENSP00000296503,9606.ENSP00000296577,9606.ENSP00000296930,9606.ENSP00000345347,9606.ENSP00000366237,9606.ENSP00000368458,9606.ENSP00000428426	RPS3,HMGB2,ABCE1,NPM1,HMGB1,DFFA,PCNA,TCEA1
GO:0061003	Positive regulation of dendritic spine morphogenesis	8	22	0.59	0.0369	9606.ENSP00000292385,9606.ENSP00000320176,9606.ENSP00000340329,9606.ENSP00000365745,9606.ENSP00000367220,9606.ENSP00000380378,9606.ENSP00000417653,9606.ENSP00000449089	DBN1,HCLS1,CAPRIN1,CTTN,ACTR2,PAFAH1B1,DBNL,DNM1L
GO:0016071	mRNA metabolic process	242	678	0.58	5.71e-57	9606.ENSP00000215793,9606.ENSP00000215829,9606.ENSP00000216252,9606.ENSP00000216832,9606.ENSP00000217109,9606.ENSP00000220592,9606.ENSP00000220849,9606.ENSP00000221419,9606.ENSP00000222247,9606.ENSP00000225430,9606.ENSP00000225698,9606.ENSP00000227524,9606.ENSP00000228284,9606.ENSP00000229390,9606.ENSP00000230050,9606.ENSP00000230640,9606.ENSP00000235090,9606.ENSP00000238112,9606.ENSP00000240185,…	SF3A1,SNRPD3,PHF5A,PNN,CSTF1,AGO2,EIF3E,HNRNPL,RPL18A,RPL19,C1QBP,PRPF19,SART3,SRSF9,RPS12,SKIV2L2,WDR77,CPSF3,TARDBP,SNRPA,SRSF6,THOC2,SNRPB2,RALY,LSM8,RPS16,LSM7,RBM39,FUS,SNRPA1,LGALS3,HRSP12,TBRG4,SRSF1,RPL35,SNW1,RBM25,RPL8,ACIN1,DCPS,SNRNP40,DNAJC8,NSUN2,HNRNPH3,CCAR1,PRPF6,CPSF6,WDR61,EIF4A3,RPS11,RPS27A,NONO,RPS3,MBNL1,HNRNPU,APP,U2AFBP,RAVER1,RPS23,TRA2A,NUDT21,SNRPD1,SRRM2,RPS9,PCBP1,SF…
GO:0010608	Posttranscriptional regulation of gene expression	207	574	0.58	5.39e-49	9606.ENSP00000044462,9606.ENSP00000157812,9606.ENSP00000210313,9606.ENSP00000215071,9606.ENSP00000215832,9606.ENSP00000216044,9606.ENSP00000216190,9606.ENSP00000216455,9606.ENSP00000216554,9606.ENSP00000216714,9606.ENSP00000216802,9606.ENSP00000217958,9606.ENSP00000219313,9606.ENSP00000220592,9606.ENSP00000220849,9606.ENSP00000221419,9606.ENSP00000223321,9606.ENSP00000225698,9606.ENSP00000228251,…	PSMA4,PSMC4,PSMD5,PSMD8,MAPK1,GTPBP1,EIF3D,PSMA3,EIF5,APEX1,PSME2,PSMD10,PSMD7,AGO2,EIF3E,HNRNPL,PSMA2,C1QBP,YBX3,GAPDH,MAPK14,TARDBP,TRAP1,EIF3K,EIF2S3,EIF3G,FUS,PTCD3,HRSP12,EIF2S1,MRPL44,TBRG4,PSMB7,LRPPRC,PSMC1,PSMA6,PSMD11,AARS,EIF3J,PSMB1,MAPK3,PSMD3,NSUN2,XPO5,EIF4H,PML,EIF4A3,PSMA5,RPS27A,RPS3,HNRNPU,APP,EIF5B,PSMB4,PSME3,EIF4A1,METAP1,ITGA2,NPM1,NUDT21,GCN1L1,PAIP1,PA2G4,RPS9,SRP9,EEF2,P…
GO:0072594	Establishment of protein localization to organelle	154	433	0.58	2.11e-35	9606.ENSP00000000412,9606.ENSP00000215570,9606.ENSP00000216034,9606.ENSP00000219169,9606.ENSP00000221418,9606.ENSP00000221566,9606.ENSP00000222247,9606.ENSP00000223136,9606.ENSP00000223641,9606.ENSP00000225430,9606.ENSP00000230050,9606.ENSP00000245544,9606.ENSP00000249269,9606.ENSP00000251453,9606.ENSP00000253794,9606.ENSP00000259469,9606.ENSP00000261396,9606.ENSP00000261574,9606.ENSP00000261667,…	M6PR,TIMM13,TOMM22,NUTF2,ECH1,SGTA,RPL18A,FIS1,SEC61B,RPL19,RPS12,NUP85,PMPCB,RPS16,VPS25,RPL35,NUP133,IPO5,KPNA3,TRAM1,RPL8,CSE1L,SPCS2,AGPS,RAB10,GRPEL1,RAB7A,TNPO3,IDE,SRP14,PML,TIMM44,RPS11,RPS27A,RPS3,RANBP2,TOMM70A,AIFM1,APPL1,KPNB1,HK2,CALM3,ACOX1,RPS23,RPS9,HSPA4,SRP9,RPL13,RPL15,RPL38,NUP93,RPL4,USP9X,RPS15A,BID,RPLP2,CHMP4A,HIST1H1B,HGS,LAMP1,ACAA1,KPNA4,HSP90AA1,TNPO1,RPS7,RPL7,RPS2,SA…
GO:0006605	Protein targeting	127	356	0.58	3.6e-29	9606.ENSP00000000412,9606.ENSP00000215570,9606.ENSP00000216034,9606.ENSP00000221418,9606.ENSP00000221566,9606.ENSP00000222247,9606.ENSP00000223136,9606.ENSP00000223641,9606.ENSP00000225430,9606.ENSP00000230050,9606.ENSP00000249269,9606.ENSP00000250244,9606.ENSP00000251453,9606.ENSP00000259469,9606.ENSP00000262213,9606.ENSP00000262584,9606.ENSP00000263672,9606.ENSP00000264167,9606.ENSP00000264335,…	M6PR,TIMM13,TOMM22,ECH1,SGTA,RPL18A,FIS1,SEC61B,RPL19,RPS12,PMPCB,AP1M2,RPS16,RPL35,TRAM1,RPL8,SPCS2,AGPS,YWHAE,GRPEL1,RAB7A,IDE,SRP14,PML,TIMM44,RPS11,RPS27A,RPS3,TOMM70A,AIFM1,ACOX1,RPS23,RPS9,HSPA4,SRP9,YWHAG,ARL6IP1,RPL13,RPL15,RPL38,RPL4,USP9X,RPS15A,BID,RPLP2,CHMP4A,HGS,ACAA1,HSP90AA1,RPS7,RPL7,RPS2,SAMM50,RPS21,RPL3,RPL27A,RPL21,RPS17,RPSA,RPL22,AP3D1,RPS26,UBE2D3,MYO1C,RPL12,RPS27,SEC63,R…
GO:0038093	Fc receptor signaling pathway	64	177	0.58	9.67e-15	9606.ENSP00000044462,9606.ENSP00000157812,9606.ENSP00000210313,9606.ENSP00000215071,9606.ENSP00000215832,9606.ENSP00000216455,9606.ENSP00000216802,9606.ENSP00000217958,9606.ENSP00000219313,9606.ENSP00000223321,9606.ENSP00000226574,9606.ENSP00000228825,9606.ENSP00000259457,9606.ENSP00000261303,9606.ENSP00000261479,9606.ENSP00000261712,9606.ENSP00000262193,9606.ENSP00000262942,9606.ENSP00000263025,…	PSMA4,PSMC4,PSMD5,PSMD8,MAPK1,PSMA3,PSME2,PSMD10,PSMD7,PSMA2,NFKB1,ARPC3,PSMB7,PSMC1,PSMA6,PSMD11,PSMB1,ARPC1A,MAPK3,ACTR3,PSMD3,PSMA5,PSMB4,CALM3,PSME3,ARPC5,CRK,PSMD1,PSMD2,PSMC5,PAK2,HSP90AA1,PSMF1,PTK2,PSMD12,RAC1,PIGR,PSMB10,MYO1C,PSMB5,PSMD4,PSMA7,HSP90AB1,PSMB2,SRC,PSMB9,PSMB8,ABI1,ACTR2,PSME1,GRB2,CDC42,PSMD14,ARPC4,PSMC2,PSMD13,PSMC6,PSMD6,PSMD9,ACTG1,YES1,PSMC3,WASF2,PSMB3
GO:0045333	Cellular respiration	57	158	0.58	4e-13	9606.ENSP00000184266,9606.ENSP00000203407,9606.ENSP00000205402,9606.ENSP00000215375,9606.ENSP00000216254,9606.ENSP00000217901,9606.ENSP00000246554,9606.ENSP00000252711,9606.ENSP00000262507,9606.ENSP00000263774,9606.ENSP00000264932,9606.ENSP00000268668,9606.ENSP00000280346,9606.ENSP00000296597,9606.ENSP00000299166,9606.ENSP00000299518,9606.ENSP00000307241,9606.ENSP00000307786,9606.ENSP00000308610,…	NDUFB4,UQCRC1,DLD,ATP5D,ACO2,IDH3G,COX6B1,NDUFA10,COQ9,NDUFS3,SDHA,NDUFB10,DLAT,NDUFAF2,NDUFB8,IDH3A,PDHB,CYCS,GPD2,ACO1,UQCRH,NDUFS8,CYC1,BID,ME2,NDUFV1,MDH2,NDUFV2,NDUFA12,IDH2,CS,ETFB,MT-CO2,MT-ND4,FH,COA6,NDUFS5,NDUFA8,SDHB,SUCLA2,IDH3B,MYBBP1A,FAHD1,SLC25A12,NDUFA11,IDH1,NDUFS1,SLC25A13,NDUFA5,SUCLG2,NDUFA13,COX6C,UQCRB,ETFA,COX4I1,NDUFAB1,ADSL
GO:0006611	Protein export from nucleus	54	150	0.58	1.97e-12	9606.ENSP00000219169,9606.ENSP00000229390,9606.ENSP00000238112,9606.ENSP00000244020,9606.ENSP00000245544,9606.ENSP00000245838,9606.ENSP00000252512,9606.ENSP00000254508,9606.ENSP00000258962,9606.ENSP00000261396,9606.ENSP00000262982,9606.ENSP00000265351,9606.ENSP00000269349,9606.ENSP00000283195,9606.ENSP00000285968,9606.ENSP00000288071,9606.ENSP00000291552,9606.ENSP00000296577,9606.ENSP00000296930,…	NUTF2,SRSF9,CPSF3,SRSF6,NUP85,THOC2,XPO7,NUP210,SRSF1,NUP133,CSE1L,XPO5,EIF4A3,RANBP2,NUP205,DDX19B,U2AFBP,ABCE1,NPM1,HSPA9,DDX19A,U2AF2,NUP93,CALR,RRS1,SRSF7,SRRM1,XPOT,EIF5A,SARNP,RANBP3,HNRNPA2B1,TPR,ADAR,AHCYL1,SRSF11,MAGOH,SRSF3,EIF6,NCBP1,NUP160,SEC13,SRSF2,RAE1,DDX39B,XPO1,SSB,ALYREF,RAN,RNPS1,RBM8A,UPF1,NUP62,CPSF1
GO:0006405	RNA export from nucleus	47	131	0.58	8.77e-11	9606.ENSP00000229390,9606.ENSP00000238112,9606.ENSP00000244020,9606.ENSP00000245544,9606.ENSP00000245838,9606.ENSP00000254508,9606.ENSP00000258962,9606.ENSP00000261396,9606.ENSP00000265351,9606.ENSP00000269349,9606.ENSP00000283195,9606.ENSP00000285968,9606.ENSP00000288071,9606.ENSP00000291552,9606.ENSP00000296577,9606.ENSP00000296930,9606.ENSP00000306117,9606.ENSP00000307863,9606.ENSP00000310668,…	SRSF9,CPSF3,SRSF6,NUP85,THOC2,NUP210,SRSF1,NUP133,XPO5,EIF4A3,RANBP2,NUP205,DDX19B,U2AFBP,ABCE1,NPM1,DDX19A,U2AF2,NUP93,RRS1,SRSF7,SRRM1,XPOT,EIF5A,SARNP,HNRNPA1,HNRNPA2B1,TPR,SRSF11,MAGOH,SRSF3,EIF6,NCBP1,NUP160,SEC13,SRSF2,RAE1,DDX39B,XPO1,SSB,ALYREF,RAN,RNPS1,RBM8A,UPF1,NUP62,CPSF1
GO:0071426	Ribonucleoprotein complex export from nucleus	45	125	0.58	2.26e-10	9606.ENSP00000229390,9606.ENSP00000238112,9606.ENSP00000244020,9606.ENSP00000245544,9606.ENSP00000245838,9606.ENSP00000254508,9606.ENSP00000258962,9606.ENSP00000261396,9606.ENSP00000269349,9606.ENSP00000283195,9606.ENSP00000285968,9606.ENSP00000288071,9606.ENSP00000291552,9606.ENSP00000296577,9606.ENSP00000296930,9606.ENSP00000306117,9606.ENSP00000307863,9606.ENSP00000310668,9606.ENSP00000322396,…	SRSF9,CPSF3,SRSF6,NUP85,THOC2,NUP210,SRSF1,NUP133,EIF4A3,RANBP2,NUP205,DDX19B,U2AFBP,ABCE1,NPM1,DDX19A,U2AF2,NUP93,RRS1,SRSF7,SRRM1,XPOT,EIF5A,SARNP,HNRNPA2B1,TPR,SRSF11,MAGOH,SRSF3,EIF6,NCBP1,NUP160,SEC13,SRSF2,RAE1,DDX39B,XPO1,SSB,ALYREF,RAN,RNPS1,RBM8A,UPF1,NUP62,CPSF1
GO:0006119	Oxidative phosphorylation	42	118	0.58	1.43e-09	9606.ENSP00000184266,9606.ENSP00000203407,9606.ENSP00000205402,9606.ENSP00000215375,9606.ENSP00000233146,9606.ENSP00000246554,9606.ENSP00000252711,9606.ENSP00000262030,9606.ENSP00000262507,9606.ENSP00000263774,9606.ENSP00000264932,9606.ENSP00000268668,9606.ENSP00000290299,9606.ENSP00000299166,9606.ENSP00000300688,9606.ENSP00000301587,9606.ENSP00000307786,9606.ENSP00000309565,9606.ENSP00000315774,…	NDUFB4,UQCRC1,DLD,ATP5D,MSH2,COX6B1,NDUFA10,ATP5B,COQ9,NDUFS3,SDHA,NDUFB10,ATP5O,NDUFB8,ATP5L,ATP5H,CYCS,UQCRH,NDUFS8,CYC1,BID,NDUFV1,NDUFV2,NDUFA12,STOML2,ATP5C1,MT-CO2,MT-ND4,COA6,ATP5F1,NDUFS5,NDUFA8,ATP5A1,NDUFA11,ATP5J,NDUFS1,NDUFA5,NDUFA13,COX6C,UQCRB,COX4I1,NDUFAB1
GO:0031124	mRNA 3-end processing	30	83	0.58	5e-07	9606.ENSP00000217109,9606.ENSP00000229390,9606.ENSP00000238112,9606.ENSP00000244020,9606.ENSP00000245838,9606.ENSP00000258962,9606.ENSP00000266679,9606.ENSP00000269349,9606.ENSP00000284981,9606.ENSP00000291552,9606.ENSP00000300291,9606.ENSP00000307863,9606.ENSP00000313007,9606.ENSP00000325905,9606.ENSP00000326261,9606.ENSP00000337632,9606.ENSP00000345412,9606.ENSP00000358814,9606.ENSP00000359988,…	CSTF1,SRSF9,CPSF3,SRSF6,THOC2,SRSF1,CPSF6,EIF4A3,APP,U2AFBP,NUDT21,U2AF2,PABPC1,SRSF7,SRRM1,SARNP,CPSF7,AHCYL1,SRSF11,MAGOH,CSTF2,SRSF3,NCBP1,SRSF2,DDX39B,PNPT1,ALYREF,RNPS1,RBM8A,CPSF1
GO:0006446	Regulation of translational initiation	27	75	0.58	2.57e-06	9606.ENSP00000216554,9606.ENSP00000220592,9606.ENSP00000220849,9606.ENSP00000248342,9606.ENSP00000256383,9606.ENSP00000265753,9606.ENSP00000289371,9606.ENSP00000296930,9606.ENSP00000302768,9606.ENSP00000313829,9606.ENSP00000326031,9606.ENSP00000336721,9606.ENSP00000354125,9606.ENSP00000356448,9606.ENSP00000359506,9606.ENSP00000364289,9606.ENSP00000370745,9606.ENSP00000382840,9606.ENSP00000386894,…	EIF5,AGO2,EIF3E,EIF3K,EIF2S1,EIF4H,EIF5B,NPM1,PAIP1,KHDRBS1,PPP1CA,LARP1,EIF3B,TPR,FMR1,NCBP1,DDX1,DDX3X,RBM4,EIF4B,EIF2B1,EIF4G1,EIF1,EIF3H,EIF4G2,DNAJC3,YTHDF3
GO:0009123	Nucleoside monophosphate metabolic process	26	72	0.58	4.09e-06	9606.ENSP00000232607,9606.ENSP00000236959,9606.ENSP00000264705,9606.ENSP00000286621,9606.ENSP00000298556,9606.ENSP00000313490,9606.ENSP00000318868,9606.ENSP00000321584,9606.ENSP00000339479,9606.ENSP00000346921,9606.ENSP00000349576,9606.ENSP00000355493,9606.ENSP00000357835,9606.ENSP00000360939,9606.ENSP00000361512,9606.ENSP00000362271,9606.ENSP00000367408,9606.ENSP00000367615,9606.ENSP00000368100,…	UMPS,ATIC,CAD,ADK,HPRT1,PFAS,SHMT1,IMPDH2,NT5C2,AK2,DCTD,ADSS,LHPP,CMPK1,PRPS1,AK1,CASK,APRT,RAD50,DUT,AK3,PRPS2,PAICS,GMPS,TJP2,ADSL
GO:0042398	Cellular modified amino acid biosynthetic process	16	45	0.58	0.00076	9606.ENSP00000216605,9606.ENSP00000216951,9606.ENSP00000223127,9606.ENSP00000229416,9606.ENSP00000236959,9606.ENSP00000275428,9606.ENSP00000300283,9606.ENSP00000318868,9606.ENSP00000319851,9606.ENSP00000325548,9606.ENSP00000346827,9606.ENSP00000380514,9606.ENSP00000387123,9606.ENSP00000404203,9606.ENSP00000478253,9606.ENSP00000480476	MTHFD1,GSS,PLOD3,GCLC,ATIC,GGCT,CKMT1B,SHMT1,CHDH,CNDP2,ALDH9A1,HAGH,ALDH7A1,CKMT2,MTHFD1L,OPLAH
GO:1901068	Guanosine-containing compound metabolic process	14	39	0.58	0.0019	9606.ENSP00000216044,9606.ENSP00000219302,9606.ENSP00000298556,9606.ENSP00000321584,9606.ENSP00000337060,9606.ENSP00000358867,9606.ENSP00000367408,9606.ENSP00000371230,9606.ENSP00000376886,9606.ENSP00000400175,9606.ENSP00000417610,9606.ENSP00000419851,9606.ENSP00000438262,9606.ENSP00000446215	GTPBP1,NME3,HPRT1,IMPDH2,NME1,GNAI3,CASK,AK3,NME1-NME2,RHOA,RAB23,GMPS,TJP2,RAN
GO:0006739	NADP metabolic process	11	31	0.58	0.0093	9606.ENSP00000252603,9606.ENSP00000265462,9606.ENSP00000303356,9606.ENSP00000321259,9606.ENSP00000331897,9606.ENSP00000352401,9606.ENSP00000362057,9606.ENSP00000371393,9606.ENSP00000390265,9606.ENSP00000391481,9606.ENSP00000416583	PGLS,PRDX5,DCXR,TALDO1,IDH2,RPE,NOX1,PGM2,IDH1,TKT,DERA
GO:0036258	Multivesicular body assembly	11	31	0.58	0.0093	9606.ENSP00000238497,9606.ENSP00000251968,9606.ENSP00000253794,9606.ENSP00000324205,9606.ENSP00000331201,9606.ENSP00000356602,9606.ENSP00000366565,9606.ENSP00000366746,9606.ENSP00000380998,9606.ENSP00000411825,9606.ENSP00000438399	VPS4B,TSG101,VPS25,CHMP4A,HGS,VTA1,VPS28,STAM,CHMP1A,PDCD6IP,IST1
GO:0044403	Symbiotic process	304	865	0.57	1.4e-71	9606.ENSP00000044462,9606.ENSP00000209875,9606.ENSP00000215832,9606.ENSP00000216190,9606.ENSP00000216297,9606.ENSP00000216336,9606.ENSP00000216455,9606.ENSP00000216479,9606.ENSP00000221566,9606.ENSP00000222247,9606.ENSP00000225430,9606.ENSP00000225698,9606.ENSP00000225777,9606.ENSP00000229239,9606.ENSP00000230050,9606.ENSP00000232003,9606.ENSP00000234420,9606.ENSP00000238497,9606.ENSP00000240185,…	PSMA4,CBX5,MAPK1,EIF3D,SUPT16H,CTSG,PSMA3,AHSA1,SGTA,RPL18A,RPL19,C1QBP,SYNGR2,GAPDH,RPS12,HRG,MSH6,VPS4B,TARDBP,NUP85,THOC2,CANX,COPB1,AP1M2,RPS16,TSG101,APOE,TRIM28,EIF3G,NUP210,CRP,LAMTOR5,CFHR5,PSMB7,RPL35,ITGAV,NUP133,SNW1,IPO5,KPNA3,C14orf166,CDH1,PSMB1,TRAM1,TCEB2,RPL8,SAMHD1,MAPK3,YWHAE,RAB7A,AMBP,VDAC1,XPO5,EIF4H,IDE,PML,IQGAP1,RPS11,RPS27A,RAB5A,DYNC1LI1,SSRP1,RPS3,SLC25A4,HNRNPU,RANBP2…
GO:0006457	Protein folding	74	213	0.57	2.61e-16	9606.ENSP00000001008,9606.ENSP00000216218,9606.ENSP00000216479,9606.ENSP00000217244,9606.ENSP00000221566,9606.ENSP00000225174,9606.ENSP00000228506,9606.ENSP00000233616,9606.ENSP00000233893,9606.ENSP00000246957,9606.ENSP00000247461,9606.ENSP00000250124,9606.ENSP00000254322,9606.ENSP00000258091,9606.ENSP00000259253,9606.ENSP00000261303,9606.ENSP00000261735,9606.ENSP00000261813,9606.ENSP00000262375,…	FKBP4,ST13,AHSA1,CSNK2A1,SGTA,PPIF,MLEC,MOGS,HSPE1,TRAP1,CANX,MPDU1,DNAJB1,CCT7,UGGT1,PSMC1,ERP29,PFDN1,DNAJA3,ERP44,GNAO1,GRPEL1,CCT6A,CCT5,RANBP2,PDIA4,VBP1,CCT8,CCT3,HSPA9,CCT2,HSP90B1,PDIA3,PPID,TBCA,PPIH,DNAJA2,GAK,TCP1,HSPH1,CHORDC1,NUDC,CALR,CRTAP,HSP90AA1,TBCD,RAD23B,VCP,DNAJC5,PFDN2,BAG3,GNAI3,BAG2,HSP90AB1,CSNK2B,DFFA,DNAJA1,HSPD1,CCT4,PFDN6,ERO1L,FKBP1A,UNC45A,PPIA,HSPA8,CRYAB,FKBP5,PF…
GO:0022900	Electron transport chain	61	174	0.57	1.4e-13	9606.ENSP00000184266,9606.ENSP00000203407,9606.ENSP00000205402,9606.ENSP00000221130,9606.ENSP00000246554,9606.ENSP00000252711,9606.ENSP00000261733,9606.ENSP00000262507,9606.ENSP00000263774,9606.ENSP00000264932,9606.ENSP00000268668,9606.ENSP00000270792,9606.ENSP00000281243,9606.ENSP00000296597,9606.ENSP00000299166,9606.ENSP00000307786,9606.ENSP00000308430,9606.ENSP00000308610,9606.ENSP00000309565,…	NDUFB4,UQCRC1,DLD,GSR,COX6B1,NDUFA10,ALDH2,COQ9,NDUFS3,SDHA,NDUFB10,SH3BGRL3,QDPR,NDUFAF2,NDUFB8,CYCS,CYB5B,GPD2,UQCRH,NDUFS8,CYC1,BID,ME2,NDUFV1,NDUFV2,NDUFA12,C15orf48,CYB5A,PTGES2,ETFB,MT-CO2,MT-ND4,AKR7A3,COA6,NCF2,GLRX3,PHGDH,AKR1A1,NDUFS5,NDUFA8,ALDH4A1,SDHB,IDH3B,MYBBP1A,GPX2,CIAPIN1,P4HA2,SLC25A12,NDUFA11,NDUFS1,TSTA3,SLC25A13,NDUFA5,POR,NDUFA13,COX6C,UQCRB,TXNRD1,ETFA,COX4I1,NDUFAB1
GO:0009141	Nucleoside triphosphate metabolic process	32	91	0.57	2.96e-07	9606.ENSP00000215375,9606.ENSP00000216044,9606.ENSP00000219302,9606.ENSP00000262030,9606.ENSP00000262878,9606.ENSP00000264705,9606.ENSP00000286621,9606.ENSP00000290299,9606.ENSP00000300688,9606.ENSP00000301587,9606.ENSP00000317159,9606.ENSP00000320171,9606.ENSP00000321584,9606.ENSP00000322524,9606.ENSP00000337060,9606.ENSP00000348886,9606.ENSP00000349142,9606.ENSP00000358737,9606.ENSP00000358867,…	ATP5D,GTPBP1,NME3,ATP5B,SAMHD1,CAD,ADK,ATP5O,ATP5L,ATP5H,CYC1,PKM,IMPDH2,DCTPP1,NME1,STOML2,ATP5C1,ATP5F1,GNAI3,CMPK1,AK1,ITPA,DUT,AK3,NME1-NME2,ATP5A1,ATP5J,SLC25A13,RHOA,RAB23,NUDT16,RAN
GO:0042773	ATP synthesis coupled electron transport	31	88	0.57	4.72e-07	9606.ENSP00000184266,9606.ENSP00000203407,9606.ENSP00000205402,9606.ENSP00000246554,9606.ENSP00000252711,9606.ENSP00000262507,9606.ENSP00000263774,9606.ENSP00000264932,9606.ENSP00000268668,9606.ENSP00000299166,9606.ENSP00000307786,9606.ENSP00000309565,9606.ENSP00000315774,9606.ENSP00000317159,9606.ENSP00000318822,9606.ENSP00000322450,9606.ENSP00000327268,9606.ENSP00000330737,9606.ENSP00000354876,…	NDUFB4,UQCRC1,DLD,COX6B1,NDUFA10,COQ9,NDUFS3,SDHA,NDUFB10,NDUFB8,CYCS,UQCRH,NDUFS8,CYC1,BID,NDUFV1,NDUFV2,NDUFA12,MT-CO2,MT-ND4,COA6,NDUFS5,NDUFA8,NDUFA11,NDUFS1,NDUFA5,NDUFA13,COX6C,UQCRB,COX4I1,NDUFAB1
GO:0009201	Ribonucleoside triphosphate biosynthetic process	18	52	0.57	0.00038	9606.ENSP00000215375,9606.ENSP00000219302,9606.ENSP00000262030,9606.ENSP00000264705,9606.ENSP00000290299,9606.ENSP00000300688,9606.ENSP00000301587,9606.ENSP00000317159,9606.ENSP00000320171,9606.ENSP00000321584,9606.ENSP00000337060,9606.ENSP00000348886,9606.ENSP00000349142,9606.ENSP00000358737,9606.ENSP00000376886,9606.ENSP00000381736,9606.ENSP00000389649,9606.ENSP00000400101	ATP5D,NME3,ATP5B,CAD,ATP5O,ATP5L,ATP5H,CYC1,PKM,IMPDH2,NME1,STOML2,ATP5C1,ATP5F1,NME1-NME2,ATP5A1,ATP5J,SLC25A13
GO:0007044	Cell-substrate junction assembly	15	43	0.57	0.0015	9606.ENSP00000171887,9606.ENSP00000200181,9606.ENSP00000258341,9606.ENSP00000293379,9606.ENSP00000296585,9606.ENSP00000316029,9606.ENSP00000323856,9606.ENSP00000342858,9606.ENSP00000346839,9606.ENSP00000360293,9606.ENSP00000362680,9606.ENSP00000364585,9606.ENSP00000365745,9606.ENSP00000377941,9606.ENSP00000386896	TNS1,ITGB4,LAMC1,ITGA5,ITGA2,TLN1,PLEC,FERMT2,FN1,SORBS1,SRC,RCC2,CTTN,ACTN1,ITGA6
GO:0046129	Purine ribonucleoside biosynthetic process	8	23	0.57	0.0446	9606.ENSP00000219302,9606.ENSP00000286621,9606.ENSP00000298556,9606.ENSP00000321584,9606.ENSP00000337060,9606.ENSP00000367615,9606.ENSP00000376886,9606.ENSP00000419851	NME3,ADK,HPRT1,IMPDH2,NME1,APRT,NME1-NME2,GMPS
GO:0051156	Glucose 6-phosphate metabolic process	8	23	0.57	0.0446	9606.ENSP00000252603,9606.ENSP00000290573,9606.ENSP00000321259,9606.ENSP00000352401,9606.ENSP00000371393,9606.ENSP00000391481,9606.ENSP00000405573,9606.ENSP00000416583	PGLS,HK2,TALDO1,RPE,PGM2,TKT,GPI,DERA
GO:0006403	RNA localization	72	210	0.56	1.3e-15	9606.ENSP00000219169,9606.ENSP00000221801,9606.ENSP00000229390,9606.ENSP00000238112,9606.ENSP00000244020,9606.ENSP00000245544,9606.ENSP00000245838,9606.ENSP00000254508,9606.ENSP00000258962,9606.ENSP00000260665,9606.ENSP00000261396,9606.ENSP00000261700,9606.ENSP00000264279,9606.ENSP00000265351,9606.ENSP00000266079,9606.ENSP00000269349,9606.ENSP00000283179,9606.ENSP00000283195,9606.ENSP00000285968,…	NUTF2,FBL,SRSF9,CPSF3,SRSF6,NUP85,THOC2,NUP210,SRSF1,LRPPRC,NUP133,C14orf166,NOP58,XPO5,PRPF6,EIF4A3,HNRNPU,RANBP2,NUP205,DDX19B,U2AFBP,ABCE1,NPM1,CCT2,DDX19A,U2AF2,NUP93,TCP1,RRS1,SRSF7,SRRM1,XPOT,RFTN1,EIF5A,SARNP,HNRNPA1,HNRNPA2B1,SFPQ,G3BP2,MYO1C,TPR,DHX9,DKC1,FMR1,SRSF11,MAGOH,YBX1,SRSF3,EIF6,NCBP1,FLOT1,NUP160,IGF2BP2,SEC13,SRSF2,CCT4,MVP,RAE1,DDX39B,KHSRP,XPO1,TST,SSB,PNPT1,ALYREF,CKAP5,RA…
GO:0050658	RNA transport	65	189	0.56	3.85e-14	9606.ENSP00000219169,9606.ENSP00000229390,9606.ENSP00000238112,9606.ENSP00000244020,9606.ENSP00000245544,9606.ENSP00000245838,9606.ENSP00000254508,9606.ENSP00000258962,9606.ENSP00000260665,9606.ENSP00000261396,9606.ENSP00000261700,9606.ENSP00000265351,9606.ENSP00000269349,9606.ENSP00000283179,9606.ENSP00000283195,9606.ENSP00000285968,9606.ENSP00000288071,9606.ENSP00000291552,9606.ENSP00000296577,…	NUTF2,SRSF9,CPSF3,SRSF6,NUP85,THOC2,NUP210,SRSF1,LRPPRC,NUP133,C14orf166,XPO5,EIF4A3,HNRNPU,RANBP2,NUP205,DDX19B,U2AFBP,ABCE1,NPM1,DDX19A,U2AF2,NUP93,RRS1,SRSF7,SRRM1,XPOT,RFTN1,EIF5A,SARNP,HNRNPA1,HNRNPA2B1,SFPQ,G3BP2,MYO1C,TPR,DHX9,FMR1,SRSF11,MAGOH,YBX1,SRSF3,EIF6,NCBP1,FLOT1,NUP160,IGF2BP2,SEC13,SRSF2,MVP,RAE1,DDX39B,KHSRP,XPO1,TST,SSB,PNPT1,ALYREF,CKAP5,RAN,RNPS1,RBM8A,UPF1,NUP62,CPSF1
GO:0051168	Nuclear export	55	162	0.56	7.86e-12	9606.ENSP00000219169,9606.ENSP00000229390,9606.ENSP00000238112,9606.ENSP00000244020,9606.ENSP00000245544,9606.ENSP00000245838,9606.ENSP00000252512,9606.ENSP00000254508,9606.ENSP00000258962,9606.ENSP00000261396,9606.ENSP00000262982,9606.ENSP00000265351,9606.ENSP00000269349,9606.ENSP00000283195,9606.ENSP00000285968,9606.ENSP00000288071,9606.ENSP00000291552,9606.ENSP00000296577,9606.ENSP00000296930,…	NUTF2,SRSF9,CPSF3,SRSF6,NUP85,THOC2,XPO7,NUP210,SRSF1,NUP133,CSE1L,XPO5,EIF4A3,RANBP2,NUP205,DDX19B,U2AFBP,ABCE1,NPM1,HSPA9,DDX19A,U2AF2,NUP93,CALR,RRS1,SRSF7,SRRM1,XPOT,EIF5A,SARNP,RANBP3,HNRNPA1,HNRNPA2B1,TPR,ADAR,AHCYL1,SRSF11,MAGOH,SRSF3,EIF6,NCBP1,NUP160,SEC13,SRSF2,RAE1,DDX39B,XPO1,SSB,ALYREF,RAN,RNPS1,RBM8A,UPF1,NUP62,CPSF1
GO:0090263	Positive regulation of canonical wnt signaling pathway	51	148	0.56	3.63e-11	9606.ENSP00000044462,9606.ENSP00000157812,9606.ENSP00000210313,9606.ENSP00000215071,9606.ENSP00000216455,9606.ENSP00000216802,9606.ENSP00000217958,9606.ENSP00000219313,9606.ENSP00000223321,9606.ENSP00000226574,9606.ENSP00000259457,9606.ENSP00000261303,9606.ENSP00000261479,9606.ENSP00000261712,9606.ENSP00000262193,9606.ENSP00000264639,9606.ENSP00000271308,9606.ENSP00000290541,9606.ENSP00000293362,…	PSMA4,PSMC4,PSMD5,PSMD8,PSMA3,PSME2,PSMD10,PSMD7,PSMA2,NFKB1,PSMB7,PSMC1,PSMA6,PSMD11,PSMB1,PSMD3,PSMA5,PSMB4,PSME3,VPS35,PSMD1,PSMD2,PSMC5,CCAR2,RUVBL1,PPM1A,PSMF1,CAV1,PSMD12,PSMB10,VCP,PSMB5,PSMD4,PSMA7,PSMB2,SRC,PSMB9,PSMB8,PSME1,JUP,ILK,DDX3X,PSMD14,PSMC2,PSMD13,PSMC6,TBL1XR1,PSMD6,PSMD9,PSMC3,PSMB3
GO:0033209	Tumor necrosis factor-mediated signaling pathway	43	125	0.56	2.02e-09	9606.ENSP00000044462,9606.ENSP00000157812,9606.ENSP00000210313,9606.ENSP00000215071,9606.ENSP00000216455,9606.ENSP00000216802,9606.ENSP00000217958,9606.ENSP00000219313,9606.ENSP00000223321,9606.ENSP00000247470,9606.ENSP00000259457,9606.ENSP00000261303,9606.ENSP00000261479,9606.ENSP00000261712,9606.ENSP00000262193,9606.ENSP00000264639,9606.ENSP00000271308,9606.ENSP00000290541,9606.ENSP00000293362,…	PSMA4,PSMC4,PSMD5,PSMD8,PSMA3,PSME2,PSMD10,PSMD7,PSMA2,PYCARD,PSMB7,PSMC1,PSMA6,PSMD11,PSMB1,PSMD3,PSMA5,PSMB4,PSME3,PSMD1,PSMD2,PSMC5,KARS,PSMF1,PSMD12,PSMB10,STAT1,PSMB5,PSMD4,PSMA7,PSMB2,PSMB9,PSMB8,PSME1,ILK,PSMD14,PSMC2,PSMD13,PSMC6,PSMD6,PSMD9,PSMC3,PSMB3
GO:0006406	mRNA export from nucleus	37	109	0.56	5.01e-08	9606.ENSP00000229390,9606.ENSP00000238112,9606.ENSP00000244020,9606.ENSP00000245544,9606.ENSP00000245838,9606.ENSP00000254508,9606.ENSP00000258962,9606.ENSP00000261396,9606.ENSP00000269349,9606.ENSP00000283195,9606.ENSP00000285968,9606.ENSP00000288071,9606.ENSP00000291552,9606.ENSP00000306117,9606.ENSP00000307863,9606.ENSP00000310668,9606.ENSP00000325905,9606.ENSP00000326261,9606.ENSP00000336702,…	SRSF9,CPSF3,SRSF6,NUP85,THOC2,NUP210,SRSF1,NUP133,EIF4A3,RANBP2,NUP205,DDX19B,U2AFBP,DDX19A,U2AF2,NUP93,SRSF7,SRRM1,EIF5A,SARNP,HNRNPA2B1,TPR,SRSF11,MAGOH,SRSF3,NCBP1,NUP160,SEC13,SRSF2,RAE1,DDX39B,ALYREF,RNPS1,RBM8A,UPF1,NUP62,CPSF1
GO:0042775	Mitochondrial atp synthesis coupled electron transport	30	87	0.56	1.14e-06	9606.ENSP00000184266,9606.ENSP00000203407,9606.ENSP00000205402,9606.ENSP00000246554,9606.ENSP00000252711,9606.ENSP00000262507,9606.ENSP00000263774,9606.ENSP00000264932,9606.ENSP00000268668,9606.ENSP00000299166,9606.ENSP00000307786,9606.ENSP00000309565,9606.ENSP00000315774,9606.ENSP00000317159,9606.ENSP00000318822,9606.ENSP00000322450,9606.ENSP00000327268,9606.ENSP00000330737,9606.ENSP00000354876,…	NDUFB4,UQCRC1,DLD,COX6B1,NDUFA10,COQ9,NDUFS3,SDHA,NDUFB10,NDUFB8,CYCS,UQCRH,NDUFS8,CYC1,BID,NDUFV1,NDUFV2,NDUFA12,MT-CO2,MT-ND4,NDUFS5,NDUFA8,NDUFA11,NDUFS1,NDUFA5,NDUFA13,COX6C,UQCRB,COX4I1,NDUFAB1
GO:1903313	Positive regulation of mrna metabolic process	28	81	0.56	2.95e-06	9606.ENSP00000216044,9606.ENSP00000220592,9606.ENSP00000227524,9606.ENSP00000233078,9606.ENSP00000240185,9606.ENSP00000242351,9606.ENSP00000254878,9606.ENSP00000261531,9606.ENSP00000297071,9606.ENSP00000300291,9606.ENSP00000313007,9606.ENSP00000313199,9606.ENSP00000317985,9606.ENSP00000318195,9606.ENSP00000320949,9606.ENSP00000342026,9606.ENSP00000346634,9606.ENSP00000359645,9606.ENSP00000363745,…	GTPBP1,AGO2,PRPF19,DAZAP1,TARDBP,ZC3HAV1,HRSP12,SNW1,TRA2A,NUDT21,PABPC1,HNRNPD,ROCK2,NCL,CNOT1,PRDX6,THRAP3,RBMX,HNRNPR,NCBP1,RBM3,KHSRP,ROCK1,PNPT1,TRA2B,HSPA8,UPF1,YTHDF3
GO:0032272	Negative regulation of protein polymerization	24	70	0.56	2.33e-05	9606.ENSP00000001008,9606.ENSP00000248444,9606.ENSP00000259365,9606.ENSP00000262215,9606.ENSP00000263168,9606.ENSP00000263867,9606.ENSP00000264071,9606.ENSP00000264758,9606.ENSP00000303908,9606.ENSP00000308753,9606.ENSP00000347719,9606.ENSP00000348381,9606.ENSP00000349259,9606.ENSP00000356257,9606.ENSP00000357129,9606.ENSP00000361635,9606.ENSP00000361824,9606.ENSP00000362924,9606.ENSP00000364721,…	FKBP4,VIL1,TMOD1,ARFGEF1,CAPZA1,CAPG,TUBB4A,ADD1,TWF2,TMOD3,TBCD,ADD3,SPTBN1,LMOD1,SPTA1,VDAC2,SPTAN1,GSN,MAPRE1,CAPZB,STMN1,FAM49B,TWF1,SPTB
GO:0009142	Nucleoside triphosphate biosynthetic process	22	64	0.56	5.94e-05	9606.ENSP00000215375,9606.ENSP00000219302,9606.ENSP00000262030,9606.ENSP00000264705,9606.ENSP00000286621,9606.ENSP00000290299,9606.ENSP00000300688,9606.ENSP00000301587,9606.ENSP00000317159,9606.ENSP00000320171,9606.ENSP00000321584,9606.ENSP00000337060,9606.ENSP00000348886,9606.ENSP00000349142,9606.ENSP00000358737,9606.ENSP00000360939,9606.ENSP00000362271,9606.ENSP00000371230,9606.ENSP00000376886,…	ATP5D,NME3,ATP5B,CAD,ADK,ATP5O,ATP5L,ATP5H,CYC1,PKM,IMPDH2,NME1,STOML2,ATP5C1,ATP5F1,CMPK1,AK1,AK3,NME1-NME2,ATP5A1,ATP5J,SLC25A13
GO:1902369	Negative regulation of rna catabolic process	22	64	0.56	5.94e-05	9606.ENSP00000228251,9606.ENSP00000229795,9606.ENSP00000240185,9606.ENSP00000254108,9606.ENSP00000260665,9606.ENSP00000264670,9606.ENSP00000283179,9606.ENSP00000302768,9606.ENSP00000313007,9606.ENSP00000313199,9606.ENSP00000316042,9606.ENSP00000336721,9606.ENSP00000346634,9606.ENSP00000356520,9606.ENSP00000358563,9606.ENSP00000358635,9606.ENSP00000359506,9606.ENSP00000361626,9606.ENSP00000385269,…	YBX3,MAPK14,TARDBP,FUS,LRPPRC,NSUN2,HNRNPU,PAIP1,PABPC1,HNRNPD,HNRNPA0,LARP1,THRAP3,DHX9,DKC1,SYNCRIP,FMR1,YBX1,ELAVL1,SLIRP,HNRNPC,TAF15
GO:1904589	Regulation of protein import	22	65	0.56	7.16e-05	9606.ENSP00000215832,9606.ENSP00000217289,9606.ENSP00000219169,9606.ENSP00000229795,9606.ENSP00000240185,9606.ENSP00000253024,9606.ENSP00000261574,9606.ENSP00000261769,9606.ENSP00000284981,9606.ENSP00000320176,9606.ENSP00000356448,9606.ENSP00000358081,9606.ENSP00000358866,9606.ENSP00000360609,9606.ENSP00000377508,9606.ENSP00000378699,9606.ENSP00000385410,9606.ENSP00000417610,9606.ENSP00000432083,…	MAPK1,FERMT1,NUTF2,MAPK14,TARDBP,TRIM28,IPO5,CDH1,APP,HCLS1,TPR,BAG3,FLNA,HSP90AB1,JUP,CDK1,NOLC1,RAB23,HSPA8,RAN,PDCD5,NUP62
GO:1901607	Alpha-amino acid biosynthetic process	20	58	0.56	0.00015	9606.ENSP00000216605,9606.ENSP00000220966,9606.ENSP00000223127,9606.ENSP00000245206,9606.ENSP00000264705,9606.ENSP00000273920,9606.ENSP00000277865,9606.ENSP00000317379,9606.ENSP00000318868,9606.ENSP00000322991,9606.ENSP00000333666,9606.ENSP00000333667,9606.ENSP00000342502,9606.ENSP00000357838,9606.ENSP00000358417,9606.ENSP00000360268,9606.ENSP00000361471,9606.ENSP00000365773,9606.ENSP00000384949,…	MTHFD1,PYCRL,PLOD3,GOT2,CAD,ENOPH1,GLUD1,GLS,SHMT1,BCAT2,ADI1,SHMT2,PYCR2,OAT,PHGDH,ALDH18A1,ASS1,PSAT1,PYCR1,SLC25A12
GO:1902743	Regulation of lamellipodium organization	16	47	0.56	0.0011	9606.ENSP00000232003,9606.ENSP00000248444,9606.ENSP00000249071,9606.ENSP00000263238,9606.ENSP00000303908,9606.ENSP00000348461,9606.ENSP00000362680,9606.ENSP00000367220,9606.ENSP00000373905,9606.ENSP00000377471,9606.ENSP00000383118,9606.ENSP00000394496,9606.ENSP00000398632,9606.ENSP00000401010,9606.ENSP00000449428,9606.ENSP00000483313	HRG,VIL1,RAC2,ACTR3,TWF2,RAC1,SRC,ACTR2,DNM2,CORO1B,CDC42,CORO1C,CD44,CAPZB,TWF1,WASF2
GO:0044788	Modulation by host of viral process	10	29	0.56	0.0179	9606.ENSP00000252486,9606.ENSP00000255030,9606.ENSP00000286713,9606.ENSP00000345656,9606.ENSP00000359506,9606.ENSP00000417175,9606.ENSP00000432083,9606.ENSP00000432660,9606.ENSP00000479488,9606.ENSP00000481029	APOE,CRP,STOM,VAPA,FMR1,VAPB,HSPA8,CFL1,PHB,PSMC3
GO:0043312	Neutrophil degranulation	162	484	0.55	9.25e-35	9606.ENSP00000161559,9606.ENSP00000199764,9606.ENSP00000215754,9606.ENSP00000215832,9606.ENSP00000216336,9606.ENSP00000217971,9606.ENSP00000219022,9606.ENSP00000219313,9606.ENSP00000220166,9606.ENSP00000222968,9606.ENSP00000223321,9606.ENSP00000226253,9606.ENSP00000226574,9606.ENSP00000227266,9606.ENSP00000228506,9606.ENSP00000228740,9606.ENSP00000229795,9606.ENSP00000236671,9606.ENSP00000242786,…	CEACAM1,CEACAM6,MIF,MAPK1,CTSG,PGRMC1,OLFM4,PSMD7,CTSH,PDAP1,PSMA2,ALDOC,NFKB1,CTSC,MLEC,LTA4H,MAPK14,CTSD,CD97,C3,PYCARD,COPB1,ACLY,LGALS3,CAB39,PSMB7,GGH,DNAJC13,ITGAV,HEXB,PSMD11,FAF2,PSMB1,COTL1,ERP44,AGA,PSMD3,RAB10,RAB7A,SRP14,IQGAP1,PFKL,PSMA5,DYNC1LI1,LAMTOR1,STOM,CCT8,KPNB1,PDXK,CSTB,ARPC5,NCSTN,S100P,APEH,FABP5,CCT2,PA2G4,GLB1,EEF2,PSMD1,PSMD2,RAB6A,ATAD3B,TOLLIP,PKM,IMPDH2,AP2A2,CFD,LA…
GO:0022613	Ribonucleoprotein complex biogenesis	140	423	0.55	1.66e-29	9606.ENSP00000215793,9606.ENSP00000215829,9606.ENSP00000216190,9606.ENSP00000216554,9606.ENSP00000220592,9606.ENSP00000220849,9606.ENSP00000221801,9606.ENSP00000225698,9606.ENSP00000227524,9606.ENSP00000228284,9606.ENSP00000229390,9606.ENSP00000230340,9606.ENSP00000230640,9606.ENSP00000232888,9606.ENSP00000235090,9606.ENSP00000244020,9606.ENSP00000245539,9606.ENSP00000246868,9606.ENSP00000248342,…	SF3A1,SNRPD3,EIF3D,EIF5,AGO2,EIF3E,FBL,C1QBP,PRPF19,SART3,SRSF9,BYSL,SKIV2L2,RRP9,WDR77,SRSF6,MRPS7,SBDS,EIF3K,RPS16,EIF2S3,EIF3G,SRSF1,RPL35,EIF3J,DDX18,NOP58,PRPF6,CPSF6,EIF4A3,ABCE1,NPM1,NUDT21,SNRPD1,PA2G4,RPS9,WDR3,RPL38,SART1,USP39,PRKDC,MRPL1,SNRNP200,NOC2L,RUVBL1,PRMT5,RRS1,PRPF31,EIF3C,HSP90AA1,SF3B1,RPS7,RPL7,RPS2,SNRPD2,CPSF7,RPS21,RPL3,RPS17,RPSA,DDX21,PES1,CGI-74,GTPBP4,EIF3B,RPL12,H…
GO:0034655	Nucleobase-containing compound catabolic process	125	373	0.55	1.09e-26	9606.ENSP00000217426,9606.ENSP00000220849,9606.ENSP00000222247,9606.ENSP00000225430,9606.ENSP00000230050,9606.ENSP00000230640,9606.ENSP00000242784,9606.ENSP00000245552,9606.ENSP00000251453,9606.ENSP00000252622,9606.ENSP00000254878,9606.ENSP00000259469,9606.ENSP00000262584,9606.ENSP00000262878,9606.ENSP00000263579,9606.ENSP00000265838,9606.ENSP00000267973,9606.ENSP00000269349,9606.ENSP00000270625,…	AHCY,EIF3E,RPL18A,RPL19,RPS12,SKIV2L2,C19orf43,NT5C,RPS16,LSM7,HRSP12,RPL35,RPL8,SAMHD1,DCPS,ACAT1,WDR61,EIF4A3,RPS11,RPS27A,RPS3,KPNB1,HMGB2,RPS23,HPRT1,RPS9,HINT1,FEN1,RPL13,PDE12,RPL15,RPL38,RPL4,PPP1R8,PABPC1,HNRNPD,RPS15A,CNOT1,RPLP2,DCTPP1,PPP2R1A,PPP2R2A,NUDT4,RPS7,NT5C2,RPL7,RPS2,HMGB1,RPS21,RPL3,RPL27A,RPL21,RPS17,RPSA,RPL22,THRAP3,RPS26,VCP,EDC4,ETF1,PNP,RPL12,RPS27,RPL5,MAGOH,RPL7A,PAB…
GO:0045727	Positive regulation of translation	44	131	0.55	2.24e-09	9606.ENSP00000215832,9606.ENSP00000216190,9606.ENSP00000220849,9606.ENSP00000221419,9606.ENSP00000225698,9606.ENSP00000228251,9606.ENSP00000253039,9606.ENSP00000263025,9606.ENSP00000269349,9606.ENSP00000296585,9606.ENSP00000296930,9606.ENSP00000302768,9606.ENSP00000302896,9606.ENSP00000307940,9606.ENSP00000312356,9606.ENSP00000313007,9606.ENSP00000313199,9606.ENSP00000313420,9606.ENSP00000313603,…	MAPK1,EIF3D,EIF3E,HNRNPL,C1QBP,YBX3,EIF2S3,MAPK3,EIF4A3,ITGA2,NPM1,PAIP1,RPS9,EEF2,TRMT10C,PABPC1,HNRNPD,PRKDC,ABCF1,KHDRBS1,EIF3C,EIF5A,LARP1,FXR1,COA3,FAM129A,DHX9,RPL5,FMR1,RPS4X,EIF6,RBM3,DDX39B,DDX3X,ELAVL1,RHOA,CNBP,EIF4G1,MRPS27,RPL30,VIM,RPL26,DNAJC3,YTHDF3
GO:0034109	Homotypic cell-cell adhesion	19	57	0.55	0.00035	9606.ENSP00000070846,9606.ENSP00000216181,9606.ENSP00000221992,9606.ENSP00000261590,9606.ENSP00000279022,9606.ENSP00000279227,9606.ENSP00000296411,9606.ENSP00000316029,9606.ENSP00000356275,9606.ENSP00000358866,9606.ENSP00000359025,9606.ENSP00000360141,9606.ENSP00000364935,9606.ENSP00000369129,9606.ENSP00000377508,9606.ENSP00000379975,9606.ENSP00000391592,9606.ENSP00000438262,9606.ENSP00000458162	PKP2,MYH9,CEACAM5,DSG2,MYL9,FERMT3,METAP1,TLN1,CSRP1,FLNA,STXBP3,GNAS,CLIC1,DSP,JUP,ILK,PTPN6,TJP2,ACTG1
GO:1902373	Negative regulation of mrna catabolic process	18	54	0.55	0.00055	9606.ENSP00000228251,9606.ENSP00000229795,9606.ENSP00000240185,9606.ENSP00000254108,9606.ENSP00000283179,9606.ENSP00000302768,9606.ENSP00000313007,9606.ENSP00000313199,9606.ENSP00000316042,9606.ENSP00000336721,9606.ENSP00000346634,9606.ENSP00000356520,9606.ENSP00000358635,9606.ENSP00000359506,9606.ENSP00000361626,9606.ENSP00000385269,9606.ENSP00000451291,9606.ENSP00000474096	YBX3,MAPK14,TARDBP,FUS,HNRNPU,PAIP1,PABPC1,HNRNPD,HNRNPA0,LARP1,THRAP3,DHX9,SYNCRIP,FMR1,YBX1,ELAVL1,HNRNPC,TAF15
GO:2000059	Negative regulation of ubiquitin-dependent protein catabolic process	17	51	0.55	0.00085	9606.ENSP00000217244,9606.ENSP00000221566,9606.ENSP00000261601,9606.ENSP00000268058,9606.ENSP00000300231,9606.ENSP00000310670,9606.ENSP00000339095,9606.ENSP00000343535,9606.ENSP00000346483,9606.ENSP00000356425,9606.ENSP00000359345,9606.ENSP00000360609,9606.ENSP00000363676,9606.ENSP00000365131,9606.ENSP00000376753,9606.ENSP00000418770,9606.ENSP00000420311	CSNK2A1,SGTA,USP14,PML,MAP1A,CCAR2,RPS7,USP7,DDRGK1,UCHL5,RPL5,HSP90AB1,RPL11,BAG6,GIPC1,PARK7,RPL23
GO:0019674	NAD metabolic process	15	45	0.55	0.0021	9606.ENSP00000226253,9606.ENSP00000226279,9606.ENSP00000229239,9606.ENSP00000229270,9606.ENSP00000234590,9606.ENSP00000269848,9606.ENSP00000282541,9606.ENSP00000290573,9606.ENSP00000308610,9606.ENSP00000312250,9606.ENSP00000320171,9606.ENSP00000362413,9606.ENSP00000378782,9606.ENSP00000405573,9606.ENSP00000445175	ALDOC,CD38,GAPDH,TPI1,ENO1,PFKL,GPD1L,HK2,GPD2,ADPGK,PKM,PGK1,QPRT,GPI,LDHA
GO:0071616	acyl-CoA biosynthetic process	15	45	0.55	0.0021	9606.ENSP00000205402,9606.ENSP00000215882,9606.ENSP00000253382,9606.ENSP00000253792,9606.ENSP00000265838,9606.ENSP00000278353,9606.ENSP00000280346,9606.ENSP00000303525,9606.ENSP00000307241,9606.ENSP00000316924,9606.ENSP00000348429,9606.ENSP00000350012,9606.ENSP00000356820,9606.ENSP00000361642,9606.ENSP00000394863	DLD,SLC25A1,ACSS2,ACLY,ACAT1,HSD17B12,DLAT,CBR4,PDHB,ACSS1,ACSL5,ACSL3,MPC2,PPCS,PPT1
GO:0046825	Regulation of protein export from nucleus	14	42	0.55	0.0034	9606.ENSP00000245838,9606.ENSP00000264335,9606.ENSP00000264670,9606.ENSP00000265351,9606.ENSP00000327255,9606.ENSP00000340989,9606.ENSP00000345848,9606.ENSP00000356448,9606.ENSP00000358081,9606.ENSP00000363641,9606.ENSP00000384863,9606.ENSP00000401470,9606.ENSP00000418770,9606.ENSP00000419782	THOC2,YWHAE,NSUN2,XPO5,PPM1A,SFN,ANP32B,TPR,BAG3,TXN,XPO1,RANGAP1,PARK7,CDK5
GO:0051973	Positive regulation of telomerase activity	12	36	0.55	0.0086	9606.ENSP00000215832,9606.ENSP00000263025,9606.ENSP00000299300,9606.ENSP00000313199,9606.ENSP00000317334,9606.ENSP00000335153,9606.ENSP00000344456,9606.ENSP00000346694,9606.ENSP00000358563,9606.ENSP00000360609,9606.ENSP00000375978,9606.ENSP00000377958	MAPK1,MAPK3,CCT2,HNRNPD,TCP1,HSP90AA1,CTNNB1,HNRNPA2B1,DKC1,HSP90AB1,XRCC5,CCT4
GO:0006084	acetyl-CoA metabolic process	10	30	0.55	0.0214	9606.ENSP00000205402,9606.ENSP00000253382,9606.ENSP00000253792,9606.ENSP00000265838,9606.ENSP00000280346,9606.ENSP00000307241,9606.ENSP00000316924,9606.ENSP00000356820,9606.ENSP00000358414,9606.ENSP00000361642	DLD,ACSS2,ACLY,ACAT1,DLAT,PDHB,ACSS1,MPC2,HMGCS2,PPCS
GO:0036230	Granulocyte activation	163	502	0.54	1e-33	9606.ENSP00000161559,9606.ENSP00000199764,9606.ENSP00000215754,9606.ENSP00000215832,9606.ENSP00000216336,9606.ENSP00000217971,9606.ENSP00000219022,9606.ENSP00000219313,9606.ENSP00000220166,9606.ENSP00000222968,9606.ENSP00000223321,9606.ENSP00000226253,9606.ENSP00000226574,9606.ENSP00000227266,9606.ENSP00000228506,9606.ENSP00000228740,9606.ENSP00000229795,9606.ENSP00000236671,9606.ENSP00000242786,…	CEACAM1,CEACAM6,MIF,MAPK1,CTSG,PGRMC1,OLFM4,PSMD7,CTSH,PDAP1,PSMA2,ALDOC,NFKB1,CTSC,MLEC,LTA4H,MAPK14,CTSD,CD97,C3,PYCARD,COPB1,ACLY,LGALS3,CAB39,PSMB7,GGH,DNAJC13,ITGAV,HEXB,PSMD11,FAF2,PSMB1,COTL1,ERP44,AGA,PSMD3,RAB10,RAB7A,SRP14,IQGAP1,PFKL,PSMA5,DYNC1LI1,LAMTOR1,STOM,CCT8,KPNB1,PDXK,CSTB,ARPC5,NCSTN,S100P,APEH,FABP5,CCT2,PA2G4,GLB1,EEF2,PSMD1,PSMD2,RAB6A,ATAD3B,TOLLIP,PKM,IMPDH2,KARS,AP2A2,C…
GO:0006397	mRNA processing	152	468	0.54	2.22e-31	9606.ENSP00000215793,9606.ENSP00000215829,9606.ENSP00000216252,9606.ENSP00000216832,9606.ENSP00000217109,9606.ENSP00000221419,9606.ENSP00000225698,9606.ENSP00000227524,9606.ENSP00000228284,9606.ENSP00000229390,9606.ENSP00000230640,9606.ENSP00000235090,9606.ENSP00000238112,9606.ENSP00000240185,9606.ENSP00000243563,9606.ENSP00000244020,9606.ENSP00000245838,9606.ENSP00000246071,9606.ENSP00000246194,…	SF3A1,SNRPD3,PHF5A,PNN,CSTF1,HNRNPL,C1QBP,PRPF19,SART3,SRSF9,SKIV2L2,WDR77,CPSF3,TARDBP,SNRPA,SRSF6,THOC2,SNRPB2,RALY,LSM8,LSM7,RBM39,FUS,SNRPA1,LGALS3,TBRG4,SRSF1,SNW1,RBM25,ACIN1,DCPS,SNRNP40,DNAJC8,HNRNPH3,CCAR1,PRPF6,CPSF6,EIF4A3,NONO,MBNL1,HNRNPU,APP,U2AFBP,RAVER1,TRA2A,NUDT21,SNRPD1,SRRM2,PCBP1,SF3B3,PPIH,U2AF2,PDE12,SART1,CCAR2,PPP1R8,USP39,PABPC1,HNRNPD,KHDRBS1,HNRNPA0,SNRNP200,SF3B2,PRMT…
GO:0006417	Regulation of translation	130	398	0.54	6.52e-27	9606.ENSP00000215832,9606.ENSP00000216044,9606.ENSP00000216190,9606.ENSP00000216554,9606.ENSP00000220592,9606.ENSP00000220849,9606.ENSP00000221419,9606.ENSP00000225698,9606.ENSP00000228251,9606.ENSP00000229239,9606.ENSP00000240185,9606.ENSP00000246957,9606.ENSP00000248342,9606.ENSP00000253039,9606.ENSP00000253108,9606.ENSP00000254630,9606.ENSP00000254878,9606.ENSP00000256383,9606.ENSP00000260665,…	MAPK1,GTPBP1,EIF3D,EIF5,AGO2,EIF3E,HNRNPL,C1QBP,YBX3,GAPDH,TARDBP,TRAP1,EIF3K,EIF2S3,EIF3G,PTCD3,HRSP12,EIF2S1,LRPPRC,AARS,EIF3J,MAPK3,EIF4H,PML,EIF4A3,RPS3,APP,EIF5B,EIF4A1,METAP1,ITGA2,NPM1,GCN1L1,PAIP1,PA2G4,RPS9,SRP9,EEF2,ACO1,RPL38,TRMT10C,PABPC1,HNRNPD,PRKDC,ABCF1,KHDRBS1,TSFM,ROCK2,NCL,SHMT1,CALR,CNOT1,TUFM,PPP1CA,EEF1G,EIF3C,SHMT2,EIF5A,LARP1,SARNP,EEF1A1,CAPRIN1,PUS7,PTBP1,FXR1,COPS5,ETF…
GO:0071453	Cellular response to oxygen levels	70	216	0.54	3.61e-14	9606.ENSP00000044462,9606.ENSP00000157812,9606.ENSP00000179259,9606.ENSP00000210313,9606.ENSP00000215071,9606.ENSP00000216455,9606.ENSP00000216802,9606.ENSP00000217958,9606.ENSP00000219313,9606.ENSP00000223321,9606.ENSP00000234701,9606.ENSP00000244043,9606.ENSP00000259457,9606.ENSP00000261303,9606.ENSP00000261479,9606.ENSP00000261712,9606.ENSP00000262193,9606.ENSP00000262306,9606.ENSP00000264639,…	PSMA4,PSMC4,C12orf5,PSMD5,PSMD8,PSMA3,PSME2,PSMD10,PSMD7,PSMA2,CLCA1,PTGIS,PSMB7,PSMC1,PSMA6,PSMD11,PSMB1,TCEB2,PSMD3,PSMA5,RPS27A,ATP6V1A,ACAA2,AIFM1,PSMB4,ATP6V0D1,PSME3,FABP1,TBL2,PSMD1,PSMD2,PSMC5,HP1BP3,NPEPPS,PSMF1,CAV1,PRKAA1,ATG7,PSMD12,PSMB10,PSMB5,LMNA,PSMD4,PSMA7,NOX1,PSMB2,PGK1,SRC,ATP6V1G1,PSMB9,PSMB8,UBQLN1,PSME1,ERO1L,PSMD14,UBA52,PSMC2,PSMD13,PSMC6,NDRG1,PSMD6,FAM162A,PSMD9,PHB2,D…
GO:0010389	Regulation of g2/m transition of mitotic cell cycle	64	198	0.54	6.05e-13	9606.ENSP00000044462,9606.ENSP00000157812,9606.ENSP00000210313,9606.ENSP00000215071,9606.ENSP00000216455,9606.ENSP00000216802,9606.ENSP00000217958,9606.ENSP00000219313,9606.ENSP00000223321,9606.ENSP00000238497,9606.ENSP00000248437,9606.ENSP00000259457,9606.ENSP00000261303,9606.ENSP00000261479,9606.ENSP00000261712,9606.ENSP00000262193,9606.ENSP00000264071,9606.ENSP00000264335,9606.ENSP00000264639,…	PSMA4,PSMC4,PSMD5,PSMD8,PSMA3,PSME2,PSMD10,PSMD7,PSMA2,VPS4B,TUBA4A,PSMB7,PSMC1,PSMA6,PSMD11,PSMB1,TUBB4A,YWHAE,PSMD3,PSMA5,APP,PSMB4,PSME3,RAD21,TUBA1A,YWHAG,PSMD1,PSMD2,PSMC5,PPP2R1A,MRE11A,HSP90AA1,PSMF1,TUBB,TUBB4B,PSMD12,PSMB10,DCTN1,PSMB5,PSMD4,ACTR1A,PSMA7,PSMB2,PSMB9,PSMB8,RCC2,MAPRE1,PSME1,DYNLL1,FHL1,SIN3A,CDK1,PAFAH1B1,PSMD14,PSMC2,PSMD13,PSMC6,DCTN2,PSMD6,CKAP5,CDK5RAP3,PSMD9,PSMC3,PS…
GO:0071456	Cellular response to hypoxia	62	189	0.54	8.83e-13	9606.ENSP00000044462,9606.ENSP00000157812,9606.ENSP00000179259,9606.ENSP00000210313,9606.ENSP00000215071,9606.ENSP00000216455,9606.ENSP00000216802,9606.ENSP00000217958,9606.ENSP00000219313,9606.ENSP00000223321,9606.ENSP00000234701,9606.ENSP00000244043,9606.ENSP00000259457,9606.ENSP00000261303,9606.ENSP00000261479,9606.ENSP00000261712,9606.ENSP00000262193,9606.ENSP00000262306,9606.ENSP00000264639,…	PSMA4,PSMC4,C12orf5,PSMD5,PSMD8,PSMA3,PSME2,PSMD10,PSMD7,PSMA2,CLCA1,PTGIS,PSMB7,PSMC1,PSMA6,PSMD11,PSMB1,TCEB2,PSMD3,PSMA5,RPS27A,ACAA2,PSMB4,PSME3,FABP1,TBL2,PSMD1,PSMD2,PSMC5,HP1BP3,NPEPPS,PSMF1,PRKAA1,PSMD12,PSMB10,PSMB5,LMNA,PSMD4,PSMA7,PSMB2,PGK1,SRC,PSMB9,PSMB8,UBQLN1,PSME1,ERO1L,PSMD14,UBA52,PSMC2,PSMD13,PSMC6,NDRG1,PSMD6,FAM162A,PSMD9,PHB2,TCEB1,HYOU1,PSMC3,GNB1,PSMB3
GO:0006164	Purine nucleotide biosynthetic process	51	158	0.54	2.53e-10	9606.ENSP00000205402,9606.ENSP00000215375,9606.ENSP00000215882,9606.ENSP00000216605,9606.ENSP00000219302,9606.ENSP00000236959,9606.ENSP00000253382,9606.ENSP00000253792,9606.ENSP00000262030,9606.ENSP00000265174,9606.ENSP00000265838,9606.ENSP00000268835,9606.ENSP00000278353,9606.ENSP00000280346,9606.ENSP00000286621,9606.ENSP00000290299,9606.ENSP00000298556,9606.ENSP00000300688,9606.ENSP00000301587,…	DLD,ATP5D,SLC25A1,MTHFD1,NME3,ATIC,ACSS2,ACLY,ATP5B,PAPSS1,ACAT1,PRPSAP2,HSD17B12,DLAT,ADK,ATP5O,HPRT1,ATP5L,ATP5H,CBR4,PDHB,PFAS,ACSS1,CYC1,PKM,IMPDH2,NME1,AK2,ACSL5,STOML2,ATP5C1,ACSL3,ADSS,MPC2,ATP5F1,PRPS1,PPCS,AK1,APRT,AK3,NME1-NME2,PRPS2,ATP5A1,PAICS,ATP5J,PPT1,SLC25A13,PAPSS2,GMPS,COASY,ADSL
GO:0051028	mRNA transport	48	148	0.54	8.73e-10	9606.ENSP00000219169,9606.ENSP00000229390,9606.ENSP00000238112,9606.ENSP00000244020,9606.ENSP00000245544,9606.ENSP00000245838,9606.ENSP00000254508,9606.ENSP00000258962,9606.ENSP00000260665,9606.ENSP00000261396,9606.ENSP00000269349,9606.ENSP00000283195,9606.ENSP00000285968,9606.ENSP00000288071,9606.ENSP00000291552,9606.ENSP00000306117,9606.ENSP00000307863,9606.ENSP00000310668,9606.ENSP00000325905,…	NUTF2,SRSF9,CPSF3,SRSF6,NUP85,THOC2,NUP210,SRSF1,LRPPRC,NUP133,EIF4A3,RANBP2,NUP205,DDX19B,U2AFBP,DDX19A,U2AF2,NUP93,SRSF7,SRRM1,EIF5A,SARNP,HNRNPA1,HNRNPA2B1,G3BP2,MYO1C,TPR,DHX9,FMR1,SRSF11,MAGOH,SRSF3,NCBP1,NUP160,IGF2BP2,SEC13,SRSF2,MVP,RAE1,DDX39B,KHSRP,XPO1,ALYREF,RNPS1,RBM8A,UPF1,NUP62,CPSF1
GO:0019886	Antigen processing and presentation of exogenous peptide antigen via mhc class ii	31	96	0.54	2.28e-06	9606.ENSP00000236671,9606.ENSP00000247461,9606.ENSP00000250244,9606.ENSP00000258198,9606.ENSP00000263168,9606.ENSP00000265062,9606.ENSP00000273130,9606.ENSP00000292807,9606.ENSP00000327694,9606.ENSP00000343405,9606.ENSP00000350199,9606.ENSP00000353099,9606.ENSP00000354791,9606.ENSP00000357981,9606.ENSP00000358921,9606.ENSP00000373312,9606.ENSP00000373905,9606.ENSP00000376297,9606.ENSP00000377148,…	CTSD,CANX,AP1M2,DYNC1LI2,CAPZA1,RAB7A,DYNC1LI1,AP2M1,AP2A2,SEC24C,AP1B1,HLA-DRB1,DCTN1,CTSS,ACTR1A,SEC13,DNM2,DYNLL1,AP1G1,SEC31A,HLA-DRA,SEC24A,SAR1B,CAPZB,HLA-DPB1,DCTN2,KLC1,SEC24B,DYNLL2,CLTC,AP2B1
GO:0019395	Fatty acid oxidation	26	80	0.54	1.98e-05	9606.ENSP00000220764,9606.ENSP00000221418,9606.ENSP00000229795,9606.ENSP00000242592,9606.ENSP00000263383,9606.ENSP00000265641,9606.ENSP00000265838,9606.ENSP00000285093,9606.ENSP00000293217,9606.ENSP00000301729,9606.ENSP00000325136,9606.ENSP00000333664,9606.ENSP00000346148,9606.ENSP00000346173,9606.ENSP00000356015,9606.ENSP00000357535,9606.ENSP00000359233,9606.ENSP00000360541,9606.ENSP00000360569,…	DECR1,ECH1,MAPK14,ACADS,ILVBL,CPT1A,ACAT1,ACAA2,ACOX1,ECI1,HADHB,ACAA1,PRKAA1,ETFB,ACAT2,ECHS1,ABCD3,CPT2,SCP2,AMACR,IVD,POR,HSD17B4,ECHDC1,ETFA,HADH
GO:0042274	Ribosomal small subunit biogenesis	23	70	0.54	6.55e-05	9606.ENSP00000230340,9606.ENSP00000245539,9606.ENSP00000251453,9606.ENSP00000296930,9606.ENSP00000308179,9606.ENSP00000309830,9606.ENSP00000313420,9606.ENSP00000322396,9606.ENSP00000339095,9606.ENSP00000345957,9606.ENSP00000346046,9606.ENSP00000346067,9606.ENSP00000355541,9606.ENSP00000357555,9606.ENSP00000369757,9606.ENSP00000375978,9606.ENSP00000379888,9606.ENSP00000383949,9606.ENSP00000385958,…	BYSL,MRPS7,RPS16,NPM1,WDR3,RPL38,PRKDC,RRS1,RPS7,RPS21,RPS17,RPSA,HEATR1,RPS27,RPS6,XRCC5,RPS8,NHP2L1,RPS14,RPS24,RPS19,RPS28,RPS5
GO:0046824	Positive regulation of nucleocytoplasmic transport	22	67	0.54	0.0001	9606.ENSP00000215832,9606.ENSP00000219169,9606.ENSP00000229795,9606.ENSP00000240185,9606.ENSP00000253024,9606.ENSP00000261574,9606.ENSP00000261769,9606.ENSP00000264335,9606.ENSP00000266679,9606.ENSP00000313829,9606.ENSP00000320176,9606.ENSP00000327255,9606.ENSP00000340989,9606.ENSP00000345848,9606.ENSP00000356448,9606.ENSP00000356520,9606.ENSP00000358081,9606.ENSP00000358866,9606.ENSP00000360609,…	MAPK1,NUTF2,MAPK14,TARDBP,TRIM28,IPO5,CDH1,YWHAE,CPSF6,KHDRBS1,HCLS1,PPM1A,SFN,ANP32B,TPR,DHX9,BAG3,FLNA,HSP90AB1,JUP,CDK1,RAN
GO:0046128	Purine ribonucleoside metabolic process	19	58	0.54	0.00042	9606.ENSP00000216044,9606.ENSP00000217426,9606.ENSP00000219302,9606.ENSP00000286621,9606.ENSP00000298556,9606.ENSP00000321584,9606.ENSP00000337060,9606.ENSP00000339479,9606.ENSP00000354532,9606.ENSP00000358867,9606.ENSP00000367408,9606.ENSP00000367615,9606.ENSP00000371230,9606.ENSP00000376886,9606.ENSP00000400175,9606.ENSP00000417610,9606.ENSP00000419851,9606.ENSP00000438262,9606.ENSP00000446215	GTPBP1,AHCY,NME3,ADK,HPRT1,IMPDH2,NME1,NT5C2,PNP,GNAI3,CASK,APRT,AK3,NME1-NME2,RHOA,RAB23,GMPS,TJP2,RAN
GO:0032210	Regulation of telomere maintenance via telomerase	18	55	0.54	0.00065	9606.ENSP00000215832,9606.ENSP00000258091,9606.ENSP00000263025,9606.ENSP00000268058,9606.ENSP00000275603,9606.ENSP00000280326,9606.ENSP00000283179,9606.ENSP00000286788,9606.ENSP00000295688,9606.ENSP00000299300,9606.ENSP00000317334,9606.ENSP00000341826,9606.ENSP00000344456,9606.ENSP00000358563,9606.ENSP00000362680,9606.ENSP00000375978,9606.ENSP00000377958,9606.ENSP00000451291	MAPK1,CCT7,MAPK3,PML,CCT6A,CCT5,HNRNPU,CCT8,CCT3,CCT2,TCP1,HNRNPA1,CTNNB1,DKC1,SRC,XRCC5,CCT4,HNRNPC
GO:0019068	Virion assembly	13	40	0.54	0.0065	9606.ENSP00000238497,9606.ENSP00000251968,9606.ENSP00000252486,9606.ENSP00000272317,9606.ENSP00000324205,9606.ENSP00000356602,9606.ENSP00000366565,9606.ENSP00000380998,9606.ENSP00000387286,9606.ENSP00000388107,9606.ENSP00000411825,9606.ENSP00000419425,9606.ENSP00000478754	VPS4B,TSG101,APOE,RPS27A,CHMP4A,VTA1,VPS28,CHMP1A,RAB1A,UBA52,PDCD6IP,PPIA,DDX6
GO:0032435	Negative regulation of proteasomal ubiquitin-dependent protein catabolic process	12	37	0.54	0.0103	9606.ENSP00000221566,9606.ENSP00000261601,9606.ENSP00000300231,9606.ENSP00000310670,9606.ENSP00000343535,9606.ENSP00000346483,9606.ENSP00000356425,9606.ENSP00000360609,9606.ENSP00000363676,9606.ENSP00000365131,9606.ENSP00000376753,9606.ENSP00000418770	SGTA,USP14,MAP1A,CCAR2,USP7,DDRGK1,UCHL5,HSP90AB1,RPL11,BAG6,GIPC1,PARK7
GO:0043603	Cellular amide metabolic process	247	773	0.53	4.69e-51	9606.ENSP00000081029,9606.ENSP00000205402,9606.ENSP00000215882,9606.ENSP00000216044,9606.ENSP00000216190,9606.ENSP00000216336,9606.ENSP00000216554,9606.ENSP00000216605,9606.ENSP00000216951,9606.ENSP00000220166,9606.ENSP00000220592,9606.ENSP00000220849,9606.ENSP00000221130,9606.ENSP00000222247,9606.ENSP00000223029,9606.ENSP00000225430,9606.ENSP00000225729,9606.ENSP00000228740,9606.ENSP00000229329,…	MRPS35,DLD,SLC25A1,GTPBP1,EIF3D,CTSG,EIF5,MTHFD1,GSS,CTSH,AGO2,EIF3E,GSR,RPL18A,AIMP2,RPL19,DRG2,LTA4H,CMAS,GCLC,RPS12,SARS,ATIC,MRPS7,EIF3K,CMA1,RPS16,EIF2S3,MRPL4,EIF3G,ACSS2,ACLY,PTCD3,EIF2S1,MRPS36,NARS,MRPL44,MRPS9,RPL35,GGH,HEXB,AARS,EIF3J,MARS,RPL8,SPCS2,DARS,MCCC1,EIF4H,ACAT1,IDE,SOD1,RPS11,RPS27A,DNPEP,GGCT,HSD17B12,RPS3,MRPL49,DLAT,FARSB,EIF5B,ACSM3,ETHE1,EIF4A1,NCSTN,APEH,ABCE1,RPS23,E…
GO:0043299	Leukocyte degranulation	163	506	0.53	2.14e-33	9606.ENSP00000161559,9606.ENSP00000199764,9606.ENSP00000215754,9606.ENSP00000215832,9606.ENSP00000216336,9606.ENSP00000217971,9606.ENSP00000219022,9606.ENSP00000219313,9606.ENSP00000220166,9606.ENSP00000222968,9606.ENSP00000223321,9606.ENSP00000226253,9606.ENSP00000226574,9606.ENSP00000227266,9606.ENSP00000228506,9606.ENSP00000228740,9606.ENSP00000229795,9606.ENSP00000236671,9606.ENSP00000242786,…	CEACAM1,CEACAM6,MIF,MAPK1,CTSG,PGRMC1,OLFM4,PSMD7,CTSH,PDAP1,PSMA2,ALDOC,NFKB1,CTSC,MLEC,LTA4H,MAPK14,CTSD,CD97,C3,PYCARD,COPB1,ACLY,LGALS3,CAB39,PSMB7,GGH,DNAJC13,ITGAV,HEXB,PSMD11,FAF2,PSMB1,COTL1,ERP44,AGA,PSMD3,RAB10,RAB7A,SRP14,IQGAP1,PFKL,PSMA5,DYNC1LI1,LAMTOR1,STOM,CCT8,KPNB1,PDXK,CSTB,ARPC5,NCSTN,S100P,APEH,FABP5,CCT2,PA2G4,GLB1,EEF2,PSMD1,PSMD2,RAB6A,ATAD3B,TOLLIP,PKM,IMPDH2,AP2A2,CFD,LA…
GO:0002444	Myeloid leukocyte mediated immunity	163	516	0.53	1.42e-32	9606.ENSP00000161559,9606.ENSP00000199764,9606.ENSP00000215754,9606.ENSP00000215832,9606.ENSP00000216336,9606.ENSP00000217971,9606.ENSP00000219022,9606.ENSP00000219313,9606.ENSP00000220166,9606.ENSP00000222968,9606.ENSP00000223321,9606.ENSP00000226253,9606.ENSP00000226574,9606.ENSP00000227266,9606.ENSP00000228506,9606.ENSP00000228740,9606.ENSP00000229795,9606.ENSP00000236671,9606.ENSP00000242786,…	CEACAM1,CEACAM6,MIF,MAPK1,CTSG,PGRMC1,OLFM4,PSMD7,CTSH,PDAP1,PSMA2,ALDOC,NFKB1,CTSC,MLEC,LTA4H,MAPK14,CTSD,CD97,C3,PYCARD,COPB1,ACLY,LGALS3,CAB39,PSMB7,GGH,DNAJC13,ITGAV,HEXB,PSMD11,FAF2,PSMB1,COTL1,ERP44,AGA,PSMD3,RAB10,RAB7A,SRP14,IQGAP1,PFKL,PSMA5,DYNC1LI1,LAMTOR1,STOM,CCT8,KPNB1,PDXK,CSTB,ARPC5,NCSTN,S100P,APEH,FABP5,CCT2,PA2G4,GLB1,EEF2,PSMD1,PSMD2,RAB6A,ATAD3B,TOLLIP,PKM,IMPDH2,AP2A2,CFD,LA…
GO:0036294	Cellular response to decreased oxygen levels	64	199	0.53	7.18e-13	9606.ENSP00000044462,9606.ENSP00000157812,9606.ENSP00000179259,9606.ENSP00000210313,9606.ENSP00000215071,9606.ENSP00000216455,9606.ENSP00000216802,9606.ENSP00000217958,9606.ENSP00000219313,9606.ENSP00000223321,9606.ENSP00000234701,9606.ENSP00000244043,9606.ENSP00000259457,9606.ENSP00000261303,9606.ENSP00000261479,9606.ENSP00000261712,9606.ENSP00000262193,9606.ENSP00000262306,9606.ENSP00000264639,…	PSMA4,PSMC4,C12orf5,PSMD5,PSMD8,PSMA3,PSME2,PSMD10,PSMD7,PSMA2,CLCA1,PTGIS,PSMB7,PSMC1,PSMA6,PSMD11,PSMB1,TCEB2,PSMD3,PSMA5,RPS27A,ACAA2,AIFM1,PSMB4,PSME3,FABP1,TBL2,PSMD1,PSMD2,PSMC5,HP1BP3,NPEPPS,PSMF1,PRKAA1,PSMD12,PSMB10,PSMB5,LMNA,PSMD4,PSMA7,PSMB2,PGK1,SRC,PSMB9,PSMB8,UBQLN1,PSME1,ERO1L,PSMD14,UBA52,PSMC2,PSMD13,PSMC6,NDRG1,PSMD6,FAM162A,PSMD9,PHB2,DNM1L,TCEB1,HYOU1,PSMC3,GNB1,PSMB3
GO:0046390	Ribose phosphate biosynthetic process	54	168	0.53	7.29e-11	9606.ENSP00000205402,9606.ENSP00000215375,9606.ENSP00000215882,9606.ENSP00000219302,9606.ENSP00000232607,9606.ENSP00000236959,9606.ENSP00000253382,9606.ENSP00000253792,9606.ENSP00000262030,9606.ENSP00000264705,9606.ENSP00000265174,9606.ENSP00000265838,9606.ENSP00000268835,9606.ENSP00000278353,9606.ENSP00000280346,9606.ENSP00000286621,9606.ENSP00000290299,9606.ENSP00000298556,9606.ENSP00000300688,…	DLD,ATP5D,SLC25A1,NME3,UMPS,ATIC,ACSS2,ACLY,ATP5B,CAD,PAPSS1,ACAT1,PRPSAP2,HSD17B12,DLAT,ADK,ATP5O,HPRT1,ATP5L,ATP5H,CBR4,PDHB,PFAS,ACSS1,CYC1,PKM,IMPDH2,NME1,AK2,ACSL5,STOML2,ATP5C1,ACSL3,ADSS,MPC2,ATP5F1,CMPK1,PRPS1,PPCS,AK1,APRT,AK3,NME1-NME2,PRPS2,ATP5A1,PAICS,ATP5J,TKT,PPT1,SLC25A13,PAPSS2,GMPS,COASY,ADSL
GO:0072522	Purine-containing compound biosynthetic process	54	169	0.53	8.77e-11	9606.ENSP00000205402,9606.ENSP00000215375,9606.ENSP00000215882,9606.ENSP00000216605,9606.ENSP00000219302,9606.ENSP00000236959,9606.ENSP00000253382,9606.ENSP00000253792,9606.ENSP00000262030,9606.ENSP00000265174,9606.ENSP00000265838,9606.ENSP00000268835,9606.ENSP00000278353,9606.ENSP00000280346,9606.ENSP00000286621,9606.ENSP00000290299,9606.ENSP00000298556,9606.ENSP00000300688,9606.ENSP00000301587,…	DLD,ATP5D,SLC25A1,MTHFD1,NME3,ATIC,ACSS2,ACLY,ATP5B,PAPSS1,ACAT1,PRPSAP2,HSD17B12,DLAT,ADK,ATP5O,HPRT1,ATP5L,ATP5H,CBR4,PDHB,PFAS,ACSS1,CYC1,SHMT1,PKM,IMPDH2,NME1,AK2,ACSL5,STOML2,ATP5C1,ACSL3,PNP,ADSS,MPC2,ATP5F1,PRPS1,PPCS,AK1,APRT,AK3,NME1-NME2,PRPS2,ATP5A1,PAICS,ATP5J,PPT1,SLC25A13,PAPSS2,GMPS,COASY,MTHFD1L,ADSL
GO:0050852	T cell receptor signaling pathway	53	167	0.53	1.7e-10	9606.ENSP00000044462,9606.ENSP00000157812,9606.ENSP00000210313,9606.ENSP00000215071,9606.ENSP00000215832,9606.ENSP00000216455,9606.ENSP00000216802,9606.ENSP00000217958,9606.ENSP00000219313,9606.ENSP00000220003,9606.ENSP00000223321,9606.ENSP00000226574,9606.ENSP00000259457,9606.ENSP00000261303,9606.ENSP00000261479,9606.ENSP00000261712,9606.ENSP00000262193,9606.ENSP00000264639,9606.ENSP00000271308,…	PSMA4,PSMC4,PSMD5,PSMD8,MAPK1,PSMA3,PSME2,PSMD10,PSMD7,CSK,PSMA2,NFKB1,PSMB7,PSMC1,PSMA6,PSMD11,PSMB1,PSMD3,PSMA5,PSMB4,PSME3,PSMD1,PSMD2,PSMC5,KHDRBS1,PAK2,UBE2N,RFTN1,PSMF1,CRKL,PSMD12,STOML2,PSMB10,HLA-DRB1,PSMB5,PSMD4,PSMA7,PSMB2,PSMB9,PSMB8,PSME1,HLA-DRA,HLA-A,PSMD14,PSMC2,PSMD13,PSMC6,HLA-DPB1,EIF2B1,PSMD6,PSMD9,PSMC3,PSMB3
GO:0009152	Purine ribonucleotide biosynthetic process	47	147	0.53	2.03e-09	9606.ENSP00000205402,9606.ENSP00000215375,9606.ENSP00000215882,9606.ENSP00000219302,9606.ENSP00000236959,9606.ENSP00000253382,9606.ENSP00000253792,9606.ENSP00000262030,9606.ENSP00000265174,9606.ENSP00000265838,9606.ENSP00000278353,9606.ENSP00000280346,9606.ENSP00000286621,9606.ENSP00000290299,9606.ENSP00000298556,9606.ENSP00000300688,9606.ENSP00000301587,9606.ENSP00000303525,9606.ENSP00000307241,…	DLD,ATP5D,SLC25A1,NME3,ATIC,ACSS2,ACLY,ATP5B,PAPSS1,ACAT1,HSD17B12,DLAT,ADK,ATP5O,HPRT1,ATP5L,ATP5H,CBR4,PDHB,PFAS,ACSS1,CYC1,PKM,IMPDH2,NME1,AK2,ACSL5,STOML2,ATP5C1,ACSL3,ADSS,MPC2,ATP5F1,PPCS,AK1,APRT,AK3,NME1-NME2,ATP5A1,PAICS,ATP5J,PPT1,SLC25A13,PAPSS2,GMPS,COASY,ADSL
GO:0046822	Regulation of nucleocytoplasmic transport	37	115	0.53	1.59e-07	9606.ENSP00000215832,9606.ENSP00000217289,9606.ENSP00000219169,9606.ENSP00000229795,9606.ENSP00000240185,9606.ENSP00000245838,9606.ENSP00000253024,9606.ENSP00000261574,9606.ENSP00000261769,9606.ENSP00000264335,9606.ENSP00000264670,9606.ENSP00000265351,9606.ENSP00000266679,9606.ENSP00000313829,9606.ENSP00000320176,9606.ENSP00000327255,9606.ENSP00000340989,9606.ENSP00000341779,9606.ENSP00000345848,…	MAPK1,FERMT1,NUTF2,MAPK14,TARDBP,THOC2,TRIM28,IPO5,CDH1,YWHAE,NSUN2,XPO5,CPSF6,KHDRBS1,HCLS1,PPM1A,SFN,PPP1CC,ANP32B,TPR,DHX9,BAG3,FLNA,HSP90AB1,TXN,JUP,CDK1,XPO1,NOLC1,RBM4,PPP1R12A,RANGAP1,RAB23,PARK7,CDK5,RAN,NUP62
GO:0043648	Dicarboxylic acid metabolic process	30	93	0.53	3.59e-06	9606.ENSP00000205402,9606.ENSP00000216605,9606.ENSP00000229416,9606.ENSP00000236959,9606.ENSP00000245206,9606.ENSP00000253792,9606.ENSP00000256441,9606.ENSP00000264932,9606.ENSP00000277865,9606.ENSP00000313432,9606.ENSP00000317379,9606.ENSP00000318868,9606.ENSP00000321070,9606.ENSP00000327070,9606.ENSP00000331897,9606.ENSP00000333667,9606.ENSP00000355493,9606.ENSP00000355518,9606.ENSP00000357838,…	DLD,MTHFD1,GCLC,ATIC,GOT2,ACLY,MRPS36,SDHA,GLUD1,GRHPR,GLS,SHMT1,ME2,MDH2,IDH2,SHMT2,ADSS,FH,OAT,ALDH18A1,ASS1,ALDH4A1,SDHB,SUCLA2,NIT2,QPRT,SLC25A12,IDH1,SUCLG2,MTHFD1L
GO:0070585	Protein localization to mitochondrion	26	81	0.53	2.34e-05	9606.ENSP00000215570,9606.ENSP00000216034,9606.ENSP00000223136,9606.ENSP00000249269,9606.ENSP00000264954,9606.ENSP00000270538,9606.ENSP00000284320,9606.ENSP00000287295,9606.ENSP00000290573,9606.ENSP00000291295,9606.ENSP00000302961,9606.ENSP00000303222,9606.ENSP00000318822,9606.ENSP00000335153,9606.ENSP00000345445,9606.ENSP00000360782,9606.ENSP00000361900,9606.ENSP00000369127,9606.ENSP00000370377,…	TIMM13,TOMM22,FIS1,PMPCB,GRPEL1,TIMM44,TOMM70A,AIFM1,HK2,CALM3,HSPA4,MTCH2,BID,HSP90AA1,SAMM50,PMPCA,TOMM34,DNAJA1,PITRM1,SLC25A6,HSPD1,TIMM9,TOMM40,NDUFA13,TIMM50,DNM1L
GO:0006090	Pyruvate metabolic process	22	69	0.53	0.00015	9606.ENSP00000205402,9606.ENSP00000216780,9606.ENSP00000226253,9606.ENSP00000229239,9606.ENSP00000229270,9606.ENSP00000234590,9606.ENSP00000265333,9606.ENSP00000269848,9606.ENSP00000280346,9606.ENSP00000290573,9606.ENSP00000307241,9606.ENSP00000312250,9606.ENSP00000320171,9606.ENSP00000321070,9606.ENSP00000333769,9606.ENSP00000356820,9606.ENSP00000362413,9606.ENSP00000362463,9606.ENSP00000379386,…	DLD,PCK2,ALDOC,GAPDH,TPI1,ENO1,VDAC1,PFKL,DLAT,HK2,PDHB,ADPGK,PKM,ME2,BSG,MPC2,PGK1,GLO1,LDHB,HAGH,GPI,LDHA
GO:0045454	Cell redox homeostasis	19	60	0.53	0.00059	9606.ENSP00000205402,9606.ENSP00000216714,9606.ENSP00000217515,9606.ENSP00000221130,9606.ENSP00000229416,9606.ENSP00000249071,9606.ENSP00000262455,9606.ENSP00000262746,9606.ENSP00000265462,9606.ENSP00000286091,9606.ENSP00000298510,9606.ENSP00000300289,9606.ENSP00000319788,9606.ENSP00000342026,9606.ENSP00000356505,9606.ENSP00000360688,9606.ENSP00000363641,9606.ENSP00000379042,9606.ENSP00000434516	DLD,APEX1,TXNL1,GSR,GCLC,RAC2,ERP44,PRDX1,PRDX5,PDIA4,PRDX3,PDIA3,NQO1,PRDX6,NCF2,TXNDC12,TXN,ERO1L,TXNRD1
GO:0030837	Negative regulation of actin filament polymerization	18	56	0.53	0.00077	9606.ENSP00000248444,9606.ENSP00000259365,9606.ENSP00000262215,9606.ENSP00000263168,9606.ENSP00000263867,9606.ENSP00000264758,9606.ENSP00000303908,9606.ENSP00000308753,9606.ENSP00000348381,9606.ENSP00000349259,9606.ENSP00000356257,9606.ENSP00000357129,9606.ENSP00000361824,9606.ENSP00000362924,9606.ENSP00000401010,9606.ENSP00000429150,9606.ENSP00000449428,9606.ENSP00000451752	VIL1,TMOD1,ARFGEF1,CAPZA1,CAPG,ADD1,TWF2,TMOD3,ADD3,SPTBN1,LMOD1,SPTA1,SPTAN1,GSN,CAPZB,FAM49B,TWF1,SPTB
GO:0008154	Actin polymerization or depolymerization	18	57	0.53	0.00092	9606.ENSP00000245932,9606.ENSP00000248444,9606.ENSP00000251166,9606.ENSP00000263867,9606.ENSP00000303908,9606.ENSP00000320176,9606.ENSP00000324573,9606.ENSP00000348128,9606.ENSP00000348461,9606.ENSP00000355809,9606.ENSP00000361883,9606.ENSP00000362924,9606.ENSP00000365312,9606.ENSP00000365745,9606.ENSP00000381565,9606.ENSP00000388169,9606.ENSP00000432660,9606.ENSP00000449428	VASP,VIL1,CORO7,CAPG,TWF2,HCLS1,FLII,SVIL,RAC1,ENAH,CAP1,GSN,ABI1,CTTN,DIAPH1,ARPC4,CFL1,TWF1
GO:0001909	Leukocyte mediated cytotoxicity	12	38	0.53	0.0122	9606.ENSP00000216336,9606.ENSP00000220166,9606.ENSP00000227266,9606.ENSP00000262746,9606.ENSP00000298556,9606.ENSP00000339001,9606.ENSP00000341289,9606.ENSP00000379873,9606.ENSP00000391592,9606.ENSP00000398803,9606.ENSP00000413606,9606.ENSP00000466090	CTSG,CTSH,CTSC,PRDX1,HPRT1,TUBB,TUBB4B,HLA-A,PTPN6,TSTA3,STXBP2,ELANE
GO:0006458	De novo protein folding	12	38	0.53	0.0122	9606.ENSP00000216218,9606.ENSP00000233893,9606.ENSP00000254322,9606.ENSP00000259253,9606.ENSP00000297185,9606.ENSP00000299300,9606.ENSP00000314499,9606.ENSP00000318687,9606.ENSP00000373620,9606.ENSP00000379042,9606.ENSP00000383003,9606.ENSP00000432083	ST13,HSPE1,DNAJB1,UGGT1,HSPA9,CCT2,GAK,HSPH1,HSPD1,ERO1L,FKBP1A,HSPA8
GO:0006958	Complement activation, classical pathway	12	38	0.53	0.0122	9606.ENSP00000223642,9606.ENSP00000224181,9606.ENSP00000225698,9606.ENSP00000245907,9606.ENSP00000255030,9606.ENSP00000266542,9606.ENSP00000322061,9606.ENSP00000354458,9606.ENSP00000363770,9606.ENSP00000378130,9606.ENSP00000385035,9606.ENSP00000415941	C5,C8G,C1QBP,C3,CRP,C1RL,C7,C8A,C1QC,CFI,C1S,C4B
GO:0006221	Pyrimidine nucleotide biosynthetic process	10	31	0.53	0.0256	9606.ENSP00000219302,9606.ENSP00000232607,9606.ENSP00000264705,9606.ENSP00000318868,9606.ENSP00000337060,9606.ENSP00000349576,9606.ENSP00000360939,9606.ENSP00000361512,9606.ENSP00000370376,9606.ENSP00000376886	NME3,UMPS,CAD,SHMT1,NME1,DCTD,CMPK1,PRPS1,DUT,NME1-NME2
GO:0002275	Myeloid cell activation involved in immune response	164	522	0.52	1.48e-32	9606.ENSP00000161559,9606.ENSP00000199764,9606.ENSP00000215754,9606.ENSP00000215832,9606.ENSP00000216336,9606.ENSP00000217971,9606.ENSP00000219022,9606.ENSP00000219313,9606.ENSP00000220166,9606.ENSP00000222968,9606.ENSP00000223321,9606.ENSP00000226253,9606.ENSP00000226574,9606.ENSP00000227266,9606.ENSP00000228506,9606.ENSP00000228740,9606.ENSP00000229795,9606.ENSP00000236671,9606.ENSP00000242786,…	CEACAM1,CEACAM6,MIF,MAPK1,CTSG,PGRMC1,OLFM4,PSMD7,CTSH,PDAP1,PSMA2,ALDOC,NFKB1,CTSC,MLEC,LTA4H,MAPK14,CTSD,CD97,C3,PYCARD,COPB1,ACLY,LGALS3,CAB39,PSMB7,GGH,DNAJC13,ITGAV,HEXB,PSMD11,FAF2,PSMB1,COTL1,ERP44,AGA,PSMD3,RAB10,RAB7A,SRP14,IQGAP1,PFKL,PSMA5,DYNC1LI1,LAMTOR1,STOM,CCT8,KPNB1,PDXK,CSTB,ARPC5,NCSTN,S100P,APEH,FABP5,CCT2,PA2G4,GLB1,EEF2,PSMD1,PSMD2,RAB6A,ATAD3B,TOLLIP,PKM,IMPDH2,KARS,AP2A2,C…
GO:0044270	Cellular nitrogen compound catabolic process	133	422	0.52	2.36e-26	9606.ENSP00000217426,9606.ENSP00000220849,9606.ENSP00000222247,9606.ENSP00000225430,9606.ENSP00000230050,9606.ENSP00000230640,9606.ENSP00000242784,9606.ENSP00000245552,9606.ENSP00000251453,9606.ENSP00000252622,9606.ENSP00000254878,9606.ENSP00000259469,9606.ENSP00000262584,9606.ENSP00000262878,9606.ENSP00000263579,9606.ENSP00000265132,9606.ENSP00000265838,9606.ENSP00000267973,9606.ENSP00000269349,…	AHCY,EIF3E,RPL18A,RPL19,RPS12,SKIV2L2,C19orf43,NT5C,RPS16,LSM7,HRSP12,RPL35,RPL8,SAMHD1,DCPS,AMBP,ACAT1,WDR61,EIF4A3,RPS11,RPS27A,RPS3,KPNB1,HMGB2,RPS23,HPRT1,RPS9,HINT1,FEN1,RPL13,PDE12,RPL15,RPL38,RPL4,PPP1R8,PABPC1,HNRNPD,RPS15A,CNOT1,RPLP2,DCTPP1,PPP2R1A,PPP2R2A,NUDT4,RPS7,NT5C2,RPL7,RPS2,HMGB1,RPS21,RPL3,RPL27A,RPL21,RPS17,RPSA,RPL22,THRAP3,RPS26,VCP,EDC4,ETF1,PNP,RPL12,RPS27,RPL5,MAGOH,RPL7…
GO:0046700	Heterocycle catabolic process	132	422	0.52	6.69e-26	9606.ENSP00000217426,9606.ENSP00000220849,9606.ENSP00000222247,9606.ENSP00000225430,9606.ENSP00000230050,9606.ENSP00000230640,9606.ENSP00000242784,9606.ENSP00000245552,9606.ENSP00000251453,9606.ENSP00000252622,9606.ENSP00000254878,9606.ENSP00000259469,9606.ENSP00000262584,9606.ENSP00000262878,9606.ENSP00000263579,9606.ENSP00000265132,9606.ENSP00000265838,9606.ENSP00000267973,9606.ENSP00000269349,…	AHCY,EIF3E,RPL18A,RPL19,RPS12,SKIV2L2,C19orf43,NT5C,RPS16,LSM7,HRSP12,RPL35,RPL8,SAMHD1,DCPS,AMBP,ACAT1,WDR61,EIF4A3,RPS11,RPS27A,RPS3,KPNB1,HMGB2,RPS23,HPRT1,RPS9,HINT1,FEN1,RPL13,PDE12,RPL15,RPL38,RPL4,PPP1R8,PABPC1,HNRNPD,RPS15A,CNOT1,RPLP2,DCTPP1,PPP2R1A,PPP2R2A,NUDT4,RPS7,NT5C2,RPL7,RPS2,HMGB1,RPS21,RPL3,RPL27A,RPL21,RPS17,RPSA,RPL22,THRAP3,RPS26,VCP,EDC4,ETF1,PNP,RPL12,AKR7A3,RPS27,RPL5,MAG…
GO:1902749	Regulation of cell cycle g2/m phase transition	67	215	0.52	6.16e-13	9606.ENSP00000044462,9606.ENSP00000157812,9606.ENSP00000210313,9606.ENSP00000215071,9606.ENSP00000216455,9606.ENSP00000216802,9606.ENSP00000217958,9606.ENSP00000219313,9606.ENSP00000223321,9606.ENSP00000238497,9606.ENSP00000248437,9606.ENSP00000259457,9606.ENSP00000261303,9606.ENSP00000261479,9606.ENSP00000261712,9606.ENSP00000262193,9606.ENSP00000264071,9606.ENSP00000264335,9606.ENSP00000264639,…	PSMA4,PSMC4,PSMD5,PSMD8,PSMA3,PSME2,PSMD10,PSMD7,PSMA2,VPS4B,TUBA4A,PSMB7,PSMC1,PSMA6,PSMD11,PSMB1,TUBB4A,YWHAE,PSMD3,PSMA5,APP,PSMB4,PSME3,NPM1,RAD21,TUBA1A,YWHAG,PSMD1,PSMD2,PSMC5,PPP2R1A,MRE11A,HSP90AA1,PSMF1,TUBB,TUBB4B,PSMD12,PSMB10,DCTN1,PSMB5,PSMD4,BRCC3,ACTR1A,PSMA7,PSMB2,PSMB9,PSMB8,RCC2,MAPRE1,PSME1,DYNLL1,FHL1,SIN3A,CDK1,PAFAH1B1,PSMD14,PSMC2,PSMD13,PSMC6,DCTN2,PSMD6,H2AFY,CKAP5,CDK5RA…
GO:0046034	ATP metabolic process	64	204	0.52	1.77e-12	9606.ENSP00000184266,9606.ENSP00000203407,9606.ENSP00000205402,9606.ENSP00000215375,9606.ENSP00000226253,9606.ENSP00000229239,9606.ENSP00000229270,9606.ENSP00000233146,9606.ENSP00000234590,9606.ENSP00000246554,9606.ENSP00000252711,9606.ENSP00000262030,9606.ENSP00000262507,9606.ENSP00000263774,9606.ENSP00000264932,9606.ENSP00000268668,9606.ENSP00000269848,9606.ENSP00000273398,9606.ENSP00000276390,…	NDUFB4,UQCRC1,DLD,ATP5D,ALDOC,GAPDH,TPI1,MSH2,ENO1,COX6B1,NDUFA10,ATP5B,COQ9,NDUFS3,SDHA,NDUFB10,PFKL,ATP6V1A,ATP6V1B2,OLA1,ATP5O,HK2,NDUFB8,ATP5L,ATP5H,CYCS,UQCRH,ADPGK,NDUFS8,CYC1,BID,PKM,NDUFV1,NDUFV2,NDUFA12,AK2,STOML2,ATP5C1,VCP,MT-CO2,MT-ND4,COA6,PARP1,ATP1B1,ATP5F1,NDUFS5,AK1,PGK1,NDUFA8,ATP5A1,NDUFA11,ATP5J,NDUFS1,SLC25A13,GPI,NDUFA5,NUDT5,NDUFA13,COX6C,UQCRB,HSPA8,LDHA,COX4I1,NDUFAB1
GO:0009260	Ribonucleotide biosynthetic process	50	160	0.52	1.01e-09	9606.ENSP00000205402,9606.ENSP00000215375,9606.ENSP00000215882,9606.ENSP00000219302,9606.ENSP00000232607,9606.ENSP00000236959,9606.ENSP00000253382,9606.ENSP00000253792,9606.ENSP00000262030,9606.ENSP00000264705,9606.ENSP00000265174,9606.ENSP00000265838,9606.ENSP00000278353,9606.ENSP00000280346,9606.ENSP00000286621,9606.ENSP00000290299,9606.ENSP00000298556,9606.ENSP00000300688,9606.ENSP00000301587,…	DLD,ATP5D,SLC25A1,NME3,UMPS,ATIC,ACSS2,ACLY,ATP5B,CAD,PAPSS1,ACAT1,HSD17B12,DLAT,ADK,ATP5O,HPRT1,ATP5L,ATP5H,CBR4,PDHB,PFAS,ACSS1,CYC1,PKM,IMPDH2,NME1,AK2,ACSL5,STOML2,ATP5C1,ACSL3,ADSS,MPC2,ATP5F1,CMPK1,PPCS,AK1,APRT,AK3,NME1-NME2,ATP5A1,PAICS,ATP5J,PPT1,SLC25A13,PAPSS2,GMPS,COASY,ADSL
GO:1900180	Regulation of protein localization to nucleus	41	131	0.52	4.87e-08	9606.ENSP00000215832,9606.ENSP00000217289,9606.ENSP00000219169,9606.ENSP00000229795,9606.ENSP00000230340,9606.ENSP00000240185,9606.ENSP00000253024,9606.ENSP00000256644,9606.ENSP00000258091,9606.ENSP00000261574,9606.ENSP00000261769,9606.ENSP00000275603,9606.ENSP00000280326,9606.ENSP00000284981,9606.ENSP00000286788,9606.ENSP00000295688,9606.ENSP00000296161,9606.ENSP00000299300,9606.ENSP00000317334,…	MAPK1,FERMT1,NUTF2,MAPK14,BYSL,TARDBP,TRIM28,LAMTOR5,CCT7,IPO5,CDH1,CCT6A,CCT5,APP,CCT8,CCT3,DTX3L,CCT2,TCP1,HCLS1,TRIM29,CD2AP,TFRC,PARP1,TPR,LMNA,BAG3,DKC1,FLNA,HSP90AB1,SRC,JUP,CCT4,SIN3A,CDK1,NOLC1,RAB23,PARK7,CDK5RAP3,RAN,NUP62
GO:0048524	Positive regulation of viral process	34	108	0.52	9.43e-07	9606.ENSP00000215909,9606.ENSP00000238497,9606.ENSP00000251968,9606.ENSP00000252486,9606.ENSP00000254436,9606.ENSP00000261531,9606.ENSP00000261875,9606.ENSP00000265062,9606.ENSP00000286713,9606.ENSP00000301764,9606.ENSP00000303754,9606.ENSP00000306614,9606.ENSP00000309142,9606.ENSP00000313007,9606.ENSP00000336721,9606.ENSP00000345656,9606.ENSP00000353099,9606.ENSP00000356520,9606.ENSP00000357459,…	LGALS1,VPS4B,TSG101,APOE,TRIM21,SNW1,PTPLAD1,RAB7A,STOM,DDB1,PPID,PPIH,PDE12,PABPC1,LARP1,VAPA,HLA-DRB1,DHX9,ADAR,FMR1,STAU1,KPNA6,SRPK1,POLR2B,LGALS9,DDX3X,TOP2B,TOP2A,POLR2H,VAPB,PPIA,HSPA8,CFL1,POLR2A
GO:0032204	Regulation of telomere maintenance	26	83	0.52	3.33e-05	9606.ENSP00000215832,9606.ENSP00000258091,9606.ENSP00000263025,9606.ENSP00000268058,9606.ENSP00000275603,9606.ENSP00000280326,9606.ENSP00000283179,9606.ENSP00000286788,9606.ENSP00000295688,9606.ENSP00000299300,9606.ENSP00000313199,9606.ENSP00000317334,9606.ENSP00000325863,9606.ENSP00000341826,9606.ENSP00000343535,9606.ENSP00000344456,9606.ENSP00000346694,9606.ENSP00000355759,9606.ENSP00000357283,…	MAPK1,CCT7,MAPK3,PML,CCT6A,CCT5,HNRNPU,CCT8,CCT3,CCT2,HNRNPD,TCP1,MRE11A,HNRNPA1,USP7,CTNNB1,HNRNPA2B1,PARP1,LMNA,DKC1,SRC,RAD50,XRCC5,CCT4,HNRNPC,UPF1
GO:0072655	Establishment of protein localization to mitochondrion	23	74	0.52	0.00013	9606.ENSP00000215570,9606.ENSP00000216034,9606.ENSP00000223136,9606.ENSP00000249269,9606.ENSP00000264954,9606.ENSP00000270538,9606.ENSP00000284320,9606.ENSP00000287295,9606.ENSP00000290573,9606.ENSP00000291295,9606.ENSP00000302961,9606.ENSP00000318822,9606.ENSP00000335153,9606.ENSP00000345445,9606.ENSP00000360782,9606.ENSP00000361900,9606.ENSP00000370377,9606.ENSP00000370808,9606.ENSP00000373620,…	TIMM13,TOMM22,FIS1,PMPCB,GRPEL1,TIMM44,TOMM70A,AIFM1,HK2,CALM3,HSPA4,BID,HSP90AA1,SAMM50,PMPCA,TOMM34,PITRM1,SLC25A6,HSPD1,TIMM9,TOMM40,NDUFA13,TIMM50
GO:0090114	COPII-coated vesicle budding	22	70	0.52	0.00018	9606.ENSP00000227266,9606.ENSP00000240851,9606.ENSP00000263354,9606.ENSP00000264933,9606.ENSP00000303145,9606.ENSP00000338844,9606.ENSP00000343405,9606.ENSP00000345656,9606.ENSP00000358071,9606.ENSP00000362807,9606.ENSP00000373312,9606.ENSP00000377390,9606.ENSP00000378721,9606.ENSP00000381293,9606.ENSP00000381823,9606.ENSP00000385432,9606.ENSP00000387286,9606.ENSP00000390783,9606.ENSP00000392147,…	CTSC,TFG,NAPA,PDCD6,TMED10,SEC23B,SEC24C,VAPA,SEC23IP,PEF1,SEC13,PPP6R3,SEC31A,NSF,SEC24A,SAR1B,RAB1A,SCFD1,PPP6C,GOLGA2,VAPB,SEC24B
GO:0006901	Vesicle coating	21	68	0.52	0.00033	9606.ENSP00000227266,9606.ENSP00000240851,9606.ENSP00000263354,9606.ENSP00000264933,9606.ENSP00000303145,9606.ENSP00000330945,9606.ENSP00000343405,9606.ENSP00000358071,9606.ENSP00000362807,9606.ENSP00000373312,9606.ENSP00000377390,9606.ENSP00000378721,9606.ENSP00000381293,9606.ENSP00000381823,9606.ENSP00000385432,9606.ENSP00000387286,9606.ENSP00000390783,9606.ENSP00000392147,9606.ENSP00000416097,…	CTSC,TFG,NAPA,PDCD6,TMED10,TMED9,SEC24C,SEC23IP,PEF1,SEC13,PPP6R3,SEC31A,NSF,SEC24A,SAR1B,RAB1A,SCFD1,PPP6C,GOLGA2,SEC24B,ARFGAP2
GO:1904356	Regulation of telomere maintenance via telomere lengthening	20	64	0.52	0.00044	9606.ENSP00000215832,9606.ENSP00000258091,9606.ENSP00000263025,9606.ENSP00000268058,9606.ENSP00000275603,9606.ENSP00000280326,9606.ENSP00000283179,9606.ENSP00000286788,9606.ENSP00000295688,9606.ENSP00000299300,9606.ENSP00000317334,9606.ENSP00000341826,9606.ENSP00000344456,9606.ENSP00000346694,9606.ENSP00000355759,9606.ENSP00000358563,9606.ENSP00000362680,9606.ENSP00000375978,9606.ENSP00000377958,…	MAPK1,CCT7,MAPK3,PML,CCT6A,CCT5,HNRNPU,CCT8,CCT3,CCT2,TCP1,HNRNPA1,CTNNB1,HNRNPA2B1,PARP1,DKC1,SRC,XRCC5,CCT4,HNRNPC
GO:0042306	Regulation of protein import into nucleus	19	61	0.52	0.00069	9606.ENSP00000215832,9606.ENSP00000217289,9606.ENSP00000219169,9606.ENSP00000229795,9606.ENSP00000240185,9606.ENSP00000253024,9606.ENSP00000261574,9606.ENSP00000261769,9606.ENSP00000320176,9606.ENSP00000356448,9606.ENSP00000358081,9606.ENSP00000358866,9606.ENSP00000360609,9606.ENSP00000377508,9606.ENSP00000378699,9606.ENSP00000385410,9606.ENSP00000417610,9606.ENSP00000446215,9606.ENSP00000471191	MAPK1,FERMT1,NUTF2,MAPK14,TARDBP,TRIM28,IPO5,CDH1,HCLS1,TPR,BAG3,FLNA,HSP90AB1,JUP,CDK1,NOLC1,RAB23,RAN,NUP62
GO:0046365	Monosaccharide catabolic process	19	61	0.52	0.00069	9606.ENSP00000226253,9606.ENSP00000229239,9606.ENSP00000229270,9606.ENSP00000234590,9606.ENSP00000267814,9606.ENSP00000269848,9606.ENSP00000290573,9606.ENSP00000303356,9606.ENSP00000306920,9606.ENSP00000312250,9606.ENSP00000320171,9606.ENSP00000352401,9606.ENSP00000361140,9606.ENSP00000362413,9606.ENSP00000371393,9606.ENSP00000378360,9606.ENSP00000405573,9606.ENSP00000419628,9606.ENSP00000483375	ALDOC,GAPDH,TPI1,ENO1,SORD,PFKL,HK2,DCXR,GLB1,ADPGK,PKM,RPE,AKR1A1,PGK1,PGM2,DAK,GPI,NUDT5,GALE
GO:0051017	Actin filament bundle assembly	17	55	0.52	0.0017	9606.ENSP00000264758,9606.ENSP00000299767,9606.ENSP00000324422,9606.ENSP00000328088,9606.ENSP00000336831,9606.ENSP00000343690,9606.ENSP00000348163,9606.ENSP00000348381,9606.ENSP00000356042,9606.ENSP00000360293,9606.ENSP00000360305,9606.ENSP00000362680,9606.ENSP00000376132,9606.ENSP00000377471,9606.ENSP00000377941,9606.ENSP00000378400,9606.ENSP00000400175	ADD1,HSP90B1,ZYX,PAWR,PLS1,DPYSL3,PLS3,ADD3,EZR,SORBS1,PDLIM1,SRC,MYO1B,CORO1B,ACTN1,LIMA1,RHOA
GO:0070527	Platelet aggregation	13	42	0.52	0.0092	9606.ENSP00000216181,9606.ENSP00000279022,9606.ENSP00000279227,9606.ENSP00000296411,9606.ENSP00000316029,9606.ENSP00000356275,9606.ENSP00000358866,9606.ENSP00000359025,9606.ENSP00000360141,9606.ENSP00000364935,9606.ENSP00000379975,9606.ENSP00000391592,9606.ENSP00000458162	MYH9,MYL9,FERMT3,METAP1,TLN1,CSRP1,FLNA,STXBP3,GNAS,CLIC1,ILK,PTPN6,ACTG1
GO:0009262	Deoxyribonucleotide metabolic process	11	35	0.52	0.0192	9606.ENSP00000245552,9606.ENSP00000262878,9606.ENSP00000286621,9606.ENSP00000300738,9606.ENSP00000318868,9606.ENSP00000322524,9606.ENSP00000349576,9606.ENSP00000353770,9606.ENSP00000370376,9606.ENSP00000416583,9606.ENSP00000422375	NT5C,SAMHD1,ADK,RRM1,SHMT1,DCTPP1,DCTD,RRM2,DUT,DERA,NUDT16
GO:0010591	Regulation of lamellipodium assembly	11	35	0.52	0.0192	9606.ENSP00000232003,9606.ENSP00000249071,9606.ENSP00000263238,9606.ENSP00000303908,9606.ENSP00000348461,9606.ENSP00000367220,9606.ENSP00000373905,9606.ENSP00000383118,9606.ENSP00000401010,9606.ENSP00000449428,9606.ENSP00000483313	HRG,RAC2,ACTR3,TWF2,RAC1,ACTR2,DNM2,CDC42,CAPZB,TWF1,WASF2
GO:0060236	Regulation of mitotic spindle organization	11	35	0.52	0.0192	9606.ENSP00000238497,9606.ENSP00000283179,9606.ENSP00000329715,9606.ENSP00000354791,9606.ENSP00000356448,9606.ENSP00000362937,9606.ENSP00000377298,9606.ENSP00000379182,9606.ENSP00000380998,9606.ENSP00000471191,9606.ENSP00000479606	VPS4B,HNRNPU,DRG1,DCTN1,TPR,RCC1,NUMA1,RAE1,CHMP1A,NUP62,CLTC
GO:0045010	Actin nucleation	9	29	0.52	0.0467	9606.ENSP00000228825,9606.ENSP00000248444,9606.ENSP00000262942,9606.ENSP00000263238,9606.ENSP00000294742,9606.ENSP00000356257,9606.ENSP00000362924,9606.ENSP00000367220,9606.ENSP00000388169	ARPC3,VIL1,ARPC1A,ACTR3,ARPC5,LMOD1,GSN,ACTR2,ARPC4
GO:0070371	ERK1 and ERK2 cascade	9	29	0.52	0.0467	9606.ENSP00000215832,9606.ENSP00000220166,9606.ENSP00000261023,9606.ENSP00000263025,9606.ENSP00000302486,9606.ENSP00000325448,9606.ENSP00000378856,9606.ENSP00000379287,9606.ENSP00000385834	MAPK1,CTSH,ITGAV,MAPK3,MAP2K1,KARS,LGALS9,YWHAZ,TF
GO:0019439	Aromatic compound catabolic process	133	437	0.51	3.48e-25	9606.ENSP00000217426,9606.ENSP00000220849,9606.ENSP00000222247,9606.ENSP00000222572,9606.ENSP00000225430,9606.ENSP00000230050,9606.ENSP00000230640,9606.ENSP00000242784,9606.ENSP00000245552,9606.ENSP00000251453,9606.ENSP00000252622,9606.ENSP00000254878,9606.ENSP00000259469,9606.ENSP00000262584,9606.ENSP00000262878,9606.ENSP00000263579,9606.ENSP00000265132,9606.ENSP00000265838,9606.ENSP00000267973,…	AHCY,EIF3E,RPL18A,PON2,RPL19,RPS12,SKIV2L2,C19orf43,NT5C,RPS16,LSM7,HRSP12,RPL35,RPL8,SAMHD1,DCPS,AMBP,ACAT1,WDR61,EIF4A3,RPS11,RPS27A,RPS3,QDPR,KPNB1,HMGB2,RPS23,HPRT1,PCBD1,RPS9,HINT1,FEN1,RPL13,PDE12,RPL15,RPL38,RPL4,PPP1R8,PABPC1,HNRNPD,RPS15A,CNOT1,RPLP2,DCTPP1,PPP2R1A,PPP2R2A,ACAA1,NUDT4,RPS7,NT5C2,RPL7,RPS2,HMGB1,RPS21,RPL3,RPL27A,RPL21,RPS17,RPSA,RPL22,THRAP3,RPS26,VCP,EDC4,ETF1,COMT,PNP,…
GO:0006091	Generation of precursor metabolites and energy	123	405	0.51	3.53e-23	9606.ENSP00000184266,9606.ENSP00000196371,9606.ENSP00000203407,9606.ENSP00000205402,9606.ENSP00000215375,9606.ENSP00000216254,9606.ENSP00000217901,9606.ENSP00000221130,9606.ENSP00000226253,9606.ENSP00000229239,9606.ENSP00000229270,9606.ENSP00000233146,9606.ENSP00000234590,9606.ENSP00000246554,9606.ENSP00000252603,9606.ENSP00000252711,9606.ENSP00000253382,9606.ENSP00000261733,9606.ENSP00000262030,…	NDUFB4,OXCT1,UQCRC1,DLD,ATP5D,ACO2,IDH3G,GSR,ALDOC,GAPDH,TPI1,MSH2,ENO1,COX6B1,PGLS,NDUFA10,ACSS2,ALDH2,ATP5B,COQ9,NDUFS3,SDHA,ACAT1,NDUFB10,PFKL,SH3BGRL3,DLAT,QDPR,SLC25A4,ATP5O,HK2,CALM3,ACOX1,NDUFAF2,NDUFB8,IDH3A,ATP5L,ATP5H,PDHB,CYCS,CYB5B,GPD2,ACO1,UQCRH,ADPGK,NDUFS8,ACSS1,CYC1,BID,PKM,ME2,TALDO1,NDUFV1,PPP1CA,MDH2,NDUFV2,NDUFA12,IDH2,UGP2,C15orf48,CYB5A,PPP1CC,CS,PTGES2,ETFB,STOML2,ATP5C1,G…
GO:0051169	Nuclear transport	81	266	0.51	3.83e-15	9606.ENSP00000215829,9606.ENSP00000219169,9606.ENSP00000229390,9606.ENSP00000238112,9606.ENSP00000244020,9606.ENSP00000245544,9606.ENSP00000245838,9606.ENSP00000252512,9606.ENSP00000254508,9606.ENSP00000258962,9606.ENSP00000261396,9606.ENSP00000261574,9606.ENSP00000261667,9606.ENSP00000262982,9606.ENSP00000265351,9606.ENSP00000265388,9606.ENSP00000268058,9606.ENSP00000269349,9606.ENSP00000283195,…	SNRPD3,NUTF2,SRSF9,CPSF3,SRSF6,NUP85,THOC2,XPO7,NUP210,SRSF1,NUP133,IPO5,KPNA3,CSE1L,XPO5,TNPO3,PML,EIF4A3,RANBP2,NUP205,DDX19B,APPL1,KPNB1,U2AFBP,ABCE1,NPM1,HSPA9,SNRPD1,DDX19A,U2AF2,BANF1,NUP93,CALR,RRS1,PRKAG1,SRSF7,SRRM1,XPOT,KPNA4,EIF5A,TNPO1,SARNP,RANBP3,HNRNPA1,SNRPD2,IPO4,HNRNPA2B1,IPO9,TPR,LMNA,ADAR,AHCYL1,SRSF11,MAGOH,KPNA6,SRSF3,EIF6,NCBP1,NUP160,IPO7,PSIP1,SEC13,SRSF2,RAE1,DDX39B,XPO1…
GO:1901293	Nucleoside phosphate biosynthetic process	72	238	0.51	2.33e-13	9606.ENSP00000205402,9606.ENSP00000215375,9606.ENSP00000215832,9606.ENSP00000215882,9606.ENSP00000216605,9606.ENSP00000219302,9606.ENSP00000232607,9606.ENSP00000236959,9606.ENSP00000244043,9606.ENSP00000253382,9606.ENSP00000253792,9606.ENSP00000262030,9606.ENSP00000264705,9606.ENSP00000265174,9606.ENSP00000265838,9606.ENSP00000268835,9606.ENSP00000278353,9606.ENSP00000280346,9606.ENSP00000286621,…	DLD,ATP5D,MAPK1,SLC25A1,MTHFD1,NME3,UMPS,ATIC,PTGIS,ACSS2,ACLY,ATP5B,CAD,PAPSS1,ACAT1,PRPSAP2,HSD17B12,DLAT,ADK,ATP5O,HPRT1,ATP5L,RRM1,ATP5H,CBR4,PDHB,PFAS,ACSS1,CYC1,SHMT1,PKM,IMPDH2,KARS,IDH2,NME1,AK2,ACSL5,STOML2,ATP5C1,DCTD,ACSL3,RRM2,PNP,ADSS,MPC2,APOA1BP,LHPP,ATP5F1,CMPK1,PRPS1,PPCS,AK1,CASK,APRT,RAD50,DUT,AK3,GARS,NME1-NME2,QPRT,PRPS2,ATP5A1,PAICS,ATP5J,PPT1,SLC25A13,NAPRT,PAPSS2,GMPS,TJP2…
GO:0045089	Positive regulation of innate immune response	63	208	0.51	9.81e-12	9606.ENSP00000044462,9606.ENSP00000157812,9606.ENSP00000210313,9606.ENSP00000215071,9606.ENSP00000216455,9606.ENSP00000216802,9606.ENSP00000217958,9606.ENSP00000219313,9606.ENSP00000223321,9606.ENSP00000226574,9606.ENSP00000247470,9606.ENSP00000256078,9606.ENSP00000259457,9606.ENSP00000261303,9606.ENSP00000261427,9606.ENSP00000261479,9606.ENSP00000261712,9606.ENSP00000262193,9606.ENSP00000264639,…	PSMA4,PSMC4,PSMD5,PSMD8,PSMA3,PSME2,PSMD10,PSMD7,PSMA2,NFKB1,PYCARD,KRAS,PSMB7,PSMC1,UBE2K,PSMA6,PSMD11,PSMB1,PSMD3,PSMA5,NONO,PSMB4,PSME3,HMGB2,PSMD1,PSMD2,PSMC5,RBM14,PRKDC,PAK2,LAMP1,PSMF1,PSPC1,HMGB1,PSMD12,SFPQ,PSMB10,XRCC6,MATR3,PSMB5,DHX9,IFI16,PSMD4,HMGB3,PSMA7,PSMB2,SRC,PSMB9,PSMB8,PSME1,XRCC5,AP1G1,SIN3A,PSMD14,PSMC2,PSMD13,PSMC6,PSMD6,PSMD9,RPS19,PSMC3,PSMB3,MUC13
GO:0071347	Cellular response to interleukin-1	53	174	0.51	5.86e-10	9606.ENSP00000044462,9606.ENSP00000157812,9606.ENSP00000210313,9606.ENSP00000215071,9606.ENSP00000216455,9606.ENSP00000216802,9606.ENSP00000217958,9606.ENSP00000219313,9606.ENSP00000223321,9606.ENSP00000226574,9606.ENSP00000244043,9606.ENSP00000247470,9606.ENSP00000259457,9606.ENSP00000261303,9606.ENSP00000261479,9606.ENSP00000261712,9606.ENSP00000262193,9606.ENSP00000263025,9606.ENSP00000264639,…	PSMA4,PSMC4,PSMD5,PSMD8,PSMA3,PSME2,PSMD10,PSMD7,PSMA2,NFKB1,PTGIS,PYCARD,PSMB7,PSMC1,PSMA6,PSMD11,PSMB1,MAPK3,PSMD3,PSMA5,RPS27A,PSMB4,PSME3,PSMD1,PSMD2,PSMC5,TOLLIP,UBE2N,PSMF1,PSMD12,PSMB10,PSMB5,CD47,PSMD4,RBMX,PSMA7,PSMB2,PSMB9,PSMB8,PSME1,SQSTM1,PSMD14,UBA52,PSMC2,PSMD13,PSMC6,PSMD6,PSMD9,OTUB1,USP10,UPF1,PSMC3,PSMB3
GO:1990542	Mitochondrial transmembrane transport	29	95	0.51	1.4e-05	9606.ENSP00000215375,9606.ENSP00000215882,9606.ENSP00000262030,9606.ENSP00000264954,9606.ENSP00000265641,9606.ENSP00000270538,9606.ENSP00000287295,9606.ENSP00000290299,9606.ENSP00000300688,9606.ENSP00000301587,9606.ENSP00000305653,9606.ENSP00000316905,9606.ENSP00000317159,9606.ENSP00000326305,9606.ENSP00000348886,9606.ENSP00000349142,9606.ENSP00000356820,9606.ENSP00000358737,9606.ENSP00000360541,…	ATP5D,SLC25A1,ATP5B,GRPEL1,CPT1A,TIMM44,AIFM1,ATP5O,ATP5L,ATP5H,LETM1,SFXN1,CYC1,SLC25A20,STOML2,ATP5C1,MPC2,ATP5F1,CPT2,MCU,HSPD1,ATP5A1,TST,SLC25A12,ATP5J,SLC25A13,PNPT1,TOMM40,TIMM50
GO:0048194	Golgi vesicle budding	24	78	0.51	0.0001	9606.ENSP00000227266,9606.ENSP00000240851,9606.ENSP00000263354,9606.ENSP00000264933,9606.ENSP00000303145,9606.ENSP00000330945,9606.ENSP00000338844,9606.ENSP00000343405,9606.ENSP00000345656,9606.ENSP00000358071,9606.ENSP00000362807,9606.ENSP00000373312,9606.ENSP00000377390,9606.ENSP00000378721,9606.ENSP00000381293,9606.ENSP00000381823,9606.ENSP00000385432,9606.ENSP00000387286,9606.ENSP00000390783,…	CTSC,TFG,NAPA,PDCD6,TMED10,TMED9,SEC23B,SEC24C,VAPA,SEC23IP,PEF1,SEC13,PPP6R3,SEC31A,NSF,SEC24A,SAR1B,RAB1A,SCFD1,PPP6C,GOLGA2,VAPB,SEC24B,ARFGAP2
GO:0009064	Glutamine family amino acid metabolic process	21	69	0.51	0.00039	9606.ENSP00000220966,9606.ENSP00000229416,9606.ENSP00000245206,9606.ENSP00000264705,9606.ENSP00000277865,9606.ENSP00000284031,9606.ENSP00000313490,9606.ENSP00000317379,9606.ENSP00000342502,9606.ENSP00000349860,9606.ENSP00000357838,9606.ENSP00000358417,9606.ENSP00000360268,9606.ENSP00000361471,9606.ENSP00000364490,9606.ENSP00000364986,9606.ENSP00000377696,9606.ENSP00000384949,9606.ENSP00000385080,…	PYCRL,GCLC,GOT2,CAD,GLUD1,DDAH1,PFAS,GLS,PYCR2,GFPT1,OAT,PHGDH,ALDH18A1,ASS1,ALDH4A1,AGMAT,NIT2,PYCR1,FAH,SLC25A12,GMPS
GO:0032981	Mitochondrial respiratory chain complex i assembly	20	66	0.51	0.00062	9606.ENSP00000184266,9606.ENSP00000252711,9606.ENSP00000263774,9606.ENSP00000268668,9606.ENSP00000287295,9606.ENSP00000296597,9606.ENSP00000299166,9606.ENSP00000312618,9606.ENSP00000315774,9606.ENSP00000322450,9606.ENSP00000327268,9606.ENSP00000330737,9606.ENSP00000354961,9606.ENSP00000362060,9606.ENSP00000362873,9606.ENSP00000389160,9606.ENSP00000392709,9606.ENSP00000417142,9606.ENSP00000423673,…	NDUFB4,NDUFA10,NDUFS3,NDUFB10,AIFM1,NDUFAF2,NDUFB8,ACAD9,NDUFS8,NDUFV1,NDUFV2,NDUFA12,MT-ND4,NDUFS5,NDUFA8,NDUFA11,NDUFS1,NDUFA5,NDUFA13,NDUFAB1
GO:0034030	Ribonucleoside bisphosphate biosynthetic process	18	59	0.51	0.0013	9606.ENSP00000205402,9606.ENSP00000215882,9606.ENSP00000253382,9606.ENSP00000253792,9606.ENSP00000265174,9606.ENSP00000265838,9606.ENSP00000278353,9606.ENSP00000280346,9606.ENSP00000303525,9606.ENSP00000307241,9606.ENSP00000316924,9606.ENSP00000348429,9606.ENSP00000350012,9606.ENSP00000356820,9606.ENSP00000361642,9606.ENSP00000394863,9606.ENSP00000406157,9606.ENSP00000464814	DLD,SLC25A1,ACSS2,ACLY,PAPSS1,ACAT1,HSD17B12,DLAT,CBR4,PDHB,ACSS1,ACSL5,ACSL3,MPC2,PPCS,PPT1,PAPSS2,COASY
GO:0034033	Purine nucleoside bisphosphate biosynthetic process	18	59	0.51	0.0013	9606.ENSP00000205402,9606.ENSP00000215882,9606.ENSP00000253382,9606.ENSP00000253792,9606.ENSP00000265174,9606.ENSP00000265838,9606.ENSP00000278353,9606.ENSP00000280346,9606.ENSP00000303525,9606.ENSP00000307241,9606.ENSP00000316924,9606.ENSP00000348429,9606.ENSP00000350012,9606.ENSP00000356820,9606.ENSP00000361642,9606.ENSP00000394863,9606.ENSP00000406157,9606.ENSP00000464814	DLD,SLC25A1,ACSS2,ACLY,PAPSS1,ACAT1,HSD17B12,DLAT,CBR4,PDHB,ACSS1,ACSL5,ACSL3,MPC2,PPCS,PPT1,PAPSS2,COASY
GO:0006749	Glutathione metabolic process	15	49	0.51	0.0043	9606.ENSP00000216951,9606.ENSP00000221130,9606.ENSP00000229416,9606.ENSP00000270142,9606.ENSP00000275428,9606.ENSP00000292147,9606.ENSP00000325548,9606.ENSP00000362463,9606.ENSP00000376807,9606.ENSP00000380514,9606.ENSP00000381607,9606.ENSP00000390265,9606.ENSP00000418770,9606.ENSP00000431049,9606.ENSP00000480476	GSS,GSR,GCLC,SOD1,GGCT,ETHE1,CNDP2,GLO1,DPEP1,HAGH,GSTP1,IDH1,PARK7,GSTK1,OPLAH
GO:0034446	Substrate adhesion-dependent cell spreading	15	49	0.51	0.0043	9606.ENSP00000054666,9606.ENSP00000222399,9606.ENSP00000258341,9606.ENSP00000261023,9606.ENSP00000267257,9606.ENSP00000279227,9606.ENSP00000342858,9606.ENSP00000346839,9606.ENSP00000348461,9606.ENSP00000362680,9606.ENSP00000378332,9606.ENSP00000379975,9606.ENSP00000387286,9606.ENSP00000388325,9606.ENSP00000400175	VAMP3,LAMB1,LAMC1,ITGAV,PXN,FERMT3,FERMT2,FN1,RAC1,SRC,TGFB1I1,ILK,RAB1A,LAMB2,RHOA
GO:0033572	Transferrin transport	11	36	0.51	0.0227	9606.ENSP00000253413,9606.ENSP00000273398,9606.ENSP00000276390,9606.ENSP00000290949,9606.ENSP00000333547,9606.ENSP00000352522,9606.ENSP00000353224,9606.ENSP00000363162,9606.ENSP00000373905,9606.ENSP00000385834,9606.ENSP00000479606	ATP6V1E1,ATP6V1A,ATP6V1B2,ATP6V0D1,RAB11B,ATP6V1H,TFRC,ATP6V1G1,DNM2,TF,CLTC
GO:0019692	Deoxyribose phosphate metabolic process	10	33	0.51	0.0357	9606.ENSP00000245552,9606.ENSP00000262878,9606.ENSP00000286621,9606.ENSP00000318868,9606.ENSP00000322524,9606.ENSP00000349576,9606.ENSP00000370376,9606.ENSP00000371393,9606.ENSP00000416583,9606.ENSP00000422375	NT5C,SAMHD1,ADK,SHMT1,DCTPP1,DCTD,DUT,PGM2,DERA,NUDT16
GO:0034248	Regulation of cellular amide metabolic process	136	456	0.5	4.48e-25	9606.ENSP00000179259,9606.ENSP00000215832,9606.ENSP00000216044,9606.ENSP00000216190,9606.ENSP00000216554,9606.ENSP00000220592,9606.ENSP00000220849,9606.ENSP00000221419,9606.ENSP00000225698,9606.ENSP00000228251,9606.ENSP00000229239,9606.ENSP00000240185,9606.ENSP00000246957,9606.ENSP00000248342,9606.ENSP00000252486,9606.ENSP00000253039,9606.ENSP00000253108,9606.ENSP00000254630,9606.ENSP00000254878,…	C12orf5,MAPK1,GTPBP1,EIF3D,EIF5,AGO2,EIF3E,HNRNPL,C1QBP,YBX3,GAPDH,TARDBP,TRAP1,EIF3K,APOE,EIF2S3,EIF3G,PTCD3,HRSP12,EIF2S1,LRPPRC,AARS,EIF3J,MAPK3,EIF4H,PML,EIF4A3,RPS3,APP,EIF5B,EIF4A1,METAP1,ITGA2,NPM1,GCN1L1,PAIP1,PA2G4,RPS9,TMED10,SRP9,EEF2,ACO1,RPL38,TRMT10C,PABPC1,HNRNPD,PRKDC,ABCF1,KHDRBS1,TSFM,ROCK2,NCL,SHMT1,CALR,CNOT1,TUFM,PPP1CA,EEF1G,EIF3C,SHMT2,EIF5A,LARP1,SARNP,EEF1A1,CAPRIN1,PRKAA…
GO:0006913	Nucleocytoplasmic transport	79	263	0.5	1.69e-14	9606.ENSP00000215829,9606.ENSP00000219169,9606.ENSP00000229390,9606.ENSP00000238112,9606.ENSP00000244020,9606.ENSP00000245544,9606.ENSP00000245838,9606.ENSP00000252512,9606.ENSP00000254508,9606.ENSP00000258962,9606.ENSP00000261396,9606.ENSP00000261574,9606.ENSP00000261667,9606.ENSP00000262982,9606.ENSP00000265351,9606.ENSP00000265388,9606.ENSP00000268058,9606.ENSP00000269349,9606.ENSP00000283195,…	SNRPD3,NUTF2,SRSF9,CPSF3,SRSF6,NUP85,THOC2,XPO7,NUP210,SRSF1,NUP133,IPO5,KPNA3,CSE1L,XPO5,TNPO3,PML,EIF4A3,RANBP2,NUP205,DDX19B,APPL1,KPNB1,U2AFBP,ABCE1,NPM1,HSPA9,SNRPD1,DDX19A,U2AF2,NUP93,CALR,RRS1,PRKAG1,SRSF7,SRRM1,XPOT,KPNA4,EIF5A,TNPO1,SARNP,RANBP3,HNRNPA1,SNRPD2,IPO4,HNRNPA2B1,IPO9,TPR,LMNA,ADAR,AHCYL1,SRSF11,MAGOH,KPNA6,SRSF3,EIF6,NCBP1,NUP160,IPO7,SEC13,SRSF2,RAE1,DDX39B,XPO1,ELAVL1,SSB,…
GO:0009165	Nucleotide biosynthetic process	71	236	0.5	4.43e-13	9606.ENSP00000205402,9606.ENSP00000215375,9606.ENSP00000215832,9606.ENSP00000215882,9606.ENSP00000216605,9606.ENSP00000219302,9606.ENSP00000232607,9606.ENSP00000236959,9606.ENSP00000244043,9606.ENSP00000253382,9606.ENSP00000253792,9606.ENSP00000262030,9606.ENSP00000264705,9606.ENSP00000265174,9606.ENSP00000265838,9606.ENSP00000268835,9606.ENSP00000278353,9606.ENSP00000280346,9606.ENSP00000286621,…	DLD,ATP5D,MAPK1,SLC25A1,MTHFD1,NME3,UMPS,ATIC,PTGIS,ACSS2,ACLY,ATP5B,CAD,PAPSS1,ACAT1,PRPSAP2,HSD17B12,DLAT,ADK,ATP5O,HPRT1,ATP5L,RRM1,ATP5H,CBR4,PDHB,PFAS,ACSS1,CYC1,SHMT1,PKM,IMPDH2,KARS,IDH2,NME1,AK2,ACSL5,STOML2,ATP5C1,DCTD,ACSL3,RRM2,PNP,ADSS,MPC2,APOA1BP,ATP5F1,CMPK1,PRPS1,PPCS,AK1,CASK,APRT,RAD50,DUT,AK3,GARS,NME1-NME2,QPRT,PRPS2,ATP5A1,PAICS,ATP5J,PPT1,SLC25A13,NAPRT,PAPSS2,GMPS,TJP2,COAS…
GO:0070555	Response to interleukin-1	59	199	0.5	1.12e-10	9606.ENSP00000044462,9606.ENSP00000157812,9606.ENSP00000210313,9606.ENSP00000215071,9606.ENSP00000216455,9606.ENSP00000216802,9606.ENSP00000217958,9606.ENSP00000219313,9606.ENSP00000223321,9606.ENSP00000226279,9606.ENSP00000226574,9606.ENSP00000229416,9606.ENSP00000244043,9606.ENSP00000247470,9606.ENSP00000259457,9606.ENSP00000261303,9606.ENSP00000261479,9606.ENSP00000261712,9606.ENSP00000262193,…	PSMA4,PSMC4,PSMD5,PSMD8,PSMA3,PSME2,PSMD10,PSMD7,PSMA2,CD38,NFKB1,GCLC,PTGIS,PYCARD,PSMB7,PSMC1,PSMA6,PSMD11,PSMB1,MAPK3,PSMD3,PSMA5,RPS27A,APP,PSMB4,PSME3,PSMD1,PSMD2,PSMC5,TOLLIP,UBE2N,PSMF1,PSMD12,PSMB10,PSMB5,CD47,PSMD4,RBMX,PSMA7,PSMB2,SRC,PSMB9,PSMB8,PSME1,SQSTM1,LGALS9,PSMD14,UBA52,PSMC2,PSMD13,PSMC6,PRKCA,PSMD6,PSMD9,OTUB1,USP10,UPF1,PSMC3,PSMB3
GO:0010565	Regulation of cellular ketone metabolic process	57	190	0.5	1.74e-10	9606.ENSP00000044462,9606.ENSP00000157812,9606.ENSP00000161559,9606.ENSP00000210313,9606.ENSP00000215071,9606.ENSP00000216455,9606.ENSP00000216802,9606.ENSP00000217958,9606.ENSP00000219313,9606.ENSP00000223321,9606.ENSP00000227667,9606.ENSP00000236850,9606.ENSP00000259457,9606.ENSP00000261303,9606.ENSP00000261479,9606.ENSP00000261712,9606.ENSP00000262193,9606.ENSP00000264639,9606.ENSP00000265641,…	PSMA4,PSMC4,CEACAM1,PSMD5,PSMD8,PSMA3,PSME2,PSMD10,PSMD7,PSMA2,APOC3,APOA1,PSMB7,PSMC1,PSMA6,PSMD11,PSMB1,PSMD3,CPT1A,PSMA5,ERLIN2,PSMB4,PSME3,FABP1,FABP5,PSMD1,PSMD2,PSMC5,NQO1,PSMF1,CAV1,PSMD12,ATP2B4,PSMB10,COMT,PSMB5,FH,PSMD4,PSMA7,PSMB2,EIF6,PSMB9,PSMB8,AKR1C3,PSME1,PDP1,PSMD14,PSMC2,PSMD13,PSMC6,ERLIN1,PSMD6,PARK7,PSMD9,APOC1,PSMC3,PSMB3
GO:0034250	Positive regulation of cellular amide metabolic process	48	162	0.5	1.01e-08	9606.ENSP00000215832,9606.ENSP00000216190,9606.ENSP00000220849,9606.ENSP00000221419,9606.ENSP00000225698,9606.ENSP00000228251,9606.ENSP00000252486,9606.ENSP00000253039,9606.ENSP00000263025,9606.ENSP00000269349,9606.ENSP00000284981,9606.ENSP00000296585,9606.ENSP00000296930,9606.ENSP00000302768,9606.ENSP00000302896,9606.ENSP00000307940,9606.ENSP00000312356,9606.ENSP00000313007,9606.ENSP00000313199,…	MAPK1,EIF3D,EIF3E,HNRNPL,C1QBP,YBX3,APOE,EIF2S3,MAPK3,EIF4A3,APP,ITGA2,NPM1,PAIP1,RPS9,EEF2,TRMT10C,PABPC1,HNRNPD,PRKDC,ABCF1,KHDRBS1,ROCK2,EIF3C,EIF5A,LARP1,FXR1,COA3,FAM129A,DHX9,RPL5,FMR1,RPS4X,EIF6,RBM3,DDX39B,DDX3X,ELAVL1,RHOA,CNBP,EIF4G1,GNB2L1,MRPS27,RPL30,VIM,RPL26,DNAJC3,YTHDF3
GO:2000573	Positive regulation of dna biosynthetic process	21	70	0.5	0.00046	9606.ENSP00000215832,9606.ENSP00000258091,9606.ENSP00000263025,9606.ENSP00000275603,9606.ENSP00000280326,9606.ENSP00000286788,9606.ENSP00000295688,9606.ENSP00000299300,9606.ENSP00000313199,9606.ENSP00000317334,9606.ENSP00000335153,9606.ENSP00000341826,9606.ENSP00000344456,9606.ENSP00000346694,9606.ENSP00000358563,9606.ENSP00000360609,9606.ENSP00000362680,9606.ENSP00000368458,9606.ENSP00000375978,…	MAPK1,CCT7,MAPK3,CCT6A,CCT5,CCT8,CCT3,CCT2,HNRNPD,TCP1,HSP90AA1,HNRNPA1,CTNNB1,HNRNPA2B1,DKC1,HSP90AB1,SRC,PCNA,XRCC5,CCT4,DDX39B
GO:0048199	Vesicle targeting, to, from or within golgi	21	71	0.5	0.00054	9606.ENSP00000227266,9606.ENSP00000240851,9606.ENSP00000263354,9606.ENSP00000264933,9606.ENSP00000303145,9606.ENSP00000330945,9606.ENSP00000343405,9606.ENSP00000358071,9606.ENSP00000362807,9606.ENSP00000373312,9606.ENSP00000377390,9606.ENSP00000378721,9606.ENSP00000381293,9606.ENSP00000381823,9606.ENSP00000385432,9606.ENSP00000387286,9606.ENSP00000390783,9606.ENSP00000392147,9606.ENSP00000416097,…	CTSC,TFG,NAPA,PDCD6,TMED10,TMED9,SEC24C,SEC23IP,PEF1,SEC13,PPP6R3,SEC31A,NSF,SEC24A,SAR1B,RAB1A,SCFD1,PPP6C,GOLGA2,SEC24B,ARFGAP2
GO:0009185	Ribonucleoside diphosphate metabolic process	19	64	0.5	0.0011	9606.ENSP00000226253,9606.ENSP00000229239,9606.ENSP00000229270,9606.ENSP00000234590,9606.ENSP00000269848,9606.ENSP00000290573,9606.ENSP00000312250,9606.ENSP00000320171,9606.ENSP00000346921,9606.ENSP00000360939,9606.ENSP00000362271,9606.ENSP00000362413,9606.ENSP00000367408,9606.ENSP00000371230,9606.ENSP00000405573,9606.ENSP00000419628,9606.ENSP00000422375,9606.ENSP00000438262,9606.ENSP00000445175	ALDOC,GAPDH,TPI1,ENO1,PFKL,HK2,ADPGK,PKM,AK2,CMPK1,AK1,PGK1,CASK,AK3,GPI,NUDT5,NUDT16,TJP2,LDHA
GO:0048208	COPII vesicle coating	19	64	0.5	0.0011	9606.ENSP00000227266,9606.ENSP00000240851,9606.ENSP00000263354,9606.ENSP00000264933,9606.ENSP00000303145,9606.ENSP00000343405,9606.ENSP00000358071,9606.ENSP00000362807,9606.ENSP00000373312,9606.ENSP00000377390,9606.ENSP00000378721,9606.ENSP00000381293,9606.ENSP00000381823,9606.ENSP00000385432,9606.ENSP00000387286,9606.ENSP00000390783,9606.ENSP00000392147,9606.ENSP00000416097,9606.ENSP00000428564	CTSC,TFG,NAPA,PDCD6,TMED10,SEC24C,SEC23IP,PEF1,SEC13,PPP6R3,SEC31A,NSF,SEC24A,SAR1B,RAB1A,SCFD1,PPP6C,GOLGA2,SEC24B
GO:0006956	Complement activation	16	54	0.5	0.0038	9606.ENSP00000223642,9606.ENSP00000224181,9606.ENSP00000225698,9606.ENSP00000245907,9606.ENSP00000255030,9606.ENSP00000256785,9606.ENSP00000266542,9606.ENSP00000322061,9606.ENSP00000332139,9606.ENSP00000354458,9606.ENSP00000356399,9606.ENSP00000363770,9606.ENSP00000378130,9606.ENSP00000385035,9606.ENSP00000415941,9606.ENSP00000417185	C5,C8G,C1QBP,C3,CRP,CFHR5,C1RL,C7,CFD,C8A,CFH,C1QC,CFI,C1S,C4B,VWA1
GO:0061014	Positive regulation of mrna catabolic process	15	50	0.5	0.005	9606.ENSP00000216044,9606.ENSP00000220592,9606.ENSP00000240185,9606.ENSP00000242351,9606.ENSP00000254878,9606.ENSP00000313007,9606.ENSP00000313199,9606.ENSP00000317985,9606.ENSP00000320949,9606.ENSP00000363745,9606.ENSP00000381216,9606.ENSP00000382697,9606.ENSP00000400646,9606.ENSP00000470142,9606.ENSP00000478490	GTPBP1,AGO2,TARDBP,ZC3HAV1,HRSP12,PABPC1,HNRNPD,ROCK2,CNOT1,HNRNPR,KHSRP,ROCK1,PNPT1,UPF1,YTHDF3
GO:0002455	Humoral immune response mediated by circulating immunoglobulin	13	44	0.5	0.0125	9606.ENSP00000223642,9606.ENSP00000224181,9606.ENSP00000225698,9606.ENSP00000245907,9606.ENSP00000255030,9606.ENSP00000266542,9606.ENSP00000322061,9606.ENSP00000353099,9606.ENSP00000354458,9606.ENSP00000363770,9606.ENSP00000378130,9606.ENSP00000385035,9606.ENSP00000415941	C5,C8G,C1QBP,C3,CRP,C1RL,C7,HLA-DRB1,C8A,C1QC,CFI,C1S,C4B
GO:0009225	Nucleotide-sugar metabolic process	11	37	0.5	0.0266	9606.ENSP00000210444,9606.ENSP00000216410,9606.ENSP00000259253,9606.ENSP00000309092,9606.ENSP00000319501,9606.ENSP00000338703,9606.ENSP00000349860,9606.ENSP00000370194,9606.ENSP00000398803,9606.ENSP00000423674,9606.ENSP00000425809	NANS,GNPNAT1,UGGT1,GMPPB,UGDH,UGP2,GFPT1,GMDS,TSTA3,GNPDA1,PGM3
GO:1901361	Organic cyclic compound catabolic process	138	472	0.49	8.9e-25	9606.ENSP00000217426,9606.ENSP00000220849,9606.ENSP00000222247,9606.ENSP00000225430,9606.ENSP00000230050,9606.ENSP00000230640,9606.ENSP00000242784,9606.ENSP00000245552,9606.ENSP00000251453,9606.ENSP00000252486,9606.ENSP00000252622,9606.ENSP00000254878,9606.ENSP00000259469,9606.ENSP00000262584,9606.ENSP00000262878,9606.ENSP00000263579,9606.ENSP00000265132,9606.ENSP00000265838,9606.ENSP00000267973,…	AHCY,EIF3E,RPL18A,RPL19,RPS12,SKIV2L2,C19orf43,NT5C,RPS16,APOE,LSM7,HRSP12,RPL35,RPL8,SAMHD1,DCPS,AMBP,ACAT1,WDR61,EIF4A3,RPS11,RPS27A,RPS3,QDPR,KPNB1,HMGB2,RPS23,HPRT1,PCBD1,RPS9,HINT1,FEN1,RPL13,PDE12,RPL15,RPL38,RPL4,PPP1R8,PABPC1,HNRNPD,RPS15A,CNOT1,RPLP2,DCTPP1,PPP2R1A,PPP2R2A,ACAA1,NUDT4,RPS7,NT5C2,RPL7,RPS2,HMGB1,RPS21,RPL3,RPL27A,RPL21,RPS17,RPSA,RPL22,THRAP3,RPS26,HSD17B11,VCP,EDC4,ETF1,…
GO:0006520	Cellular amino acid metabolic process	80	278	0.49	7.47e-14	9606.ENSP00000168216,9606.ENSP00000205402,9606.ENSP00000216605,9606.ENSP00000216951,9606.ENSP00000217426,9606.ENSP00000220966,9606.ENSP00000223029,9606.ENSP00000223127,9606.ENSP00000229416,9606.ENSP00000234677,9606.ENSP00000244137,9606.ENSP00000245206,9606.ENSP00000254878,9606.ENSP00000256854,9606.ENSP00000261772,9606.ENSP00000262027,9606.ENSP00000264161,9606.ENSP00000264705,9606.ENSP00000265395,…	HSD17B10,DLD,MTHFD1,GSS,AHCY,PYCRL,AIMP2,PLOD3,GCLC,SARS,PEPD,GOT2,HRSP12,NARS,AARS,MARS,DARS,CAD,HIBADH,MCCC1,ACAT1,ENOPH1,GLUD1,QDPR,FARSB,DDAH1,PCBD1,QARS,PFAS,GLS,SHMT1,FARSA,BCAT2,KARS,ADI1,SHMT2,PYCR2,MCCC2,PPA2,WARS,GFPT1,HIBCH,DARS2,ADSS,IARS2,EPRS,OAT,ACADSB,PHGDH,DBT,ALDH18A1,ASS1,PPA1,YARS,HMGCL,ALDH4A1,IARS,VARS,AGMAT,PSAT1,EEF1E1,CARS,GARS,DPEP1,NIT2,AIMP1,MPST,PYCR1,FAH,SMS,TST,ALDH…
GO:0015931	Nucleobase-containing compound transport	72	249	0.49	1.41e-12	9606.ENSP00000215882,9606.ENSP00000219169,9606.ENSP00000229390,9606.ENSP00000238112,9606.ENSP00000244020,9606.ENSP00000245544,9606.ENSP00000245838,9606.ENSP00000254508,9606.ENSP00000258962,9606.ENSP00000260665,9606.ENSP00000261396,9606.ENSP00000261700,9606.ENSP00000265351,9606.ENSP00000269349,9606.ENSP00000281456,9606.ENSP00000283179,9606.ENSP00000283195,9606.ENSP00000285968,9606.ENSP00000288071,…	SLC25A1,NUTF2,SRSF9,CPSF3,SRSF6,NUP85,THOC2,NUP210,SRSF1,LRPPRC,NUP133,C14orf166,XPO5,EIF4A3,SLC25A4,HNRNPU,RANBP2,NUP205,DDX19B,U2AFBP,ABCE1,NPM1,DDX19A,U2AF2,NUP93,RRS1,SRSF7,SRRM1,XPOT,RFTN1,EIF5A,SARNP,HNRNPA1,HNRNPA2B1,SFPQ,G3BP2,MYO1C,TPR,DHX9,FMR1,SRSF11,MAGOH,SLC25A5,YBX1,SRSF3,EIF6,NCBP1,FLOT1,NUP160,SLC25A6,IGF2BP2,SEC13,SRSF2,MVP,RAE1,DDX39B,KHSRP,XPO1,TST,SSB,SLC25A12,SLC25A13,PNPT1,A…
GO:0015980	Energy derivation by oxidation of organic compounds	65	223	0.49	1.73e-11	9606.ENSP00000184266,9606.ENSP00000203407,9606.ENSP00000205402,9606.ENSP00000215375,9606.ENSP00000216254,9606.ENSP00000217901,9606.ENSP00000246554,9606.ENSP00000252711,9606.ENSP00000262507,9606.ENSP00000263774,9606.ENSP00000264932,9606.ENSP00000268668,9606.ENSP00000280346,9606.ENSP00000291295,9606.ENSP00000296597,9606.ENSP00000299166,9606.ENSP00000299518,9606.ENSP00000307241,9606.ENSP00000307786,…	NDUFB4,UQCRC1,DLD,ATP5D,ACO2,IDH3G,COX6B1,NDUFA10,COQ9,NDUFS3,SDHA,NDUFB10,DLAT,CALM3,NDUFAF2,NDUFB8,IDH3A,PDHB,CYCS,GPD2,ACO1,UQCRH,NDUFS8,CYC1,BID,ME2,NDUFV1,PPP1CA,MDH2,NDUFV2,NDUFA12,IDH2,UGP2,PPP1CC,CS,ETFB,GFPT1,MT-CO2,MT-ND4,FH,COA6,GNAS,NDUFS5,NDUFA8,SDHB,SUCLA2,IDH3B,MYBBP1A,PGM2,FAHD1,SLC25A12,NDUFA11,IDH1,NDUFS1,SLC25A13,NDUFA5,SUCLG2,NDUFA13,COX6C,UQCRB,ETFA,COX4I1,NDUFAB1,PPP1R2,ADSL
GO:0019058	Viral life cycle	59	202	0.49	1.83e-10	9606.ENSP00000238497,9606.ENSP00000245544,9606.ENSP00000251968,9606.ENSP00000252486,9606.ENSP00000254508,9606.ENSP00000256644,9606.ENSP00000261023,9606.ENSP00000261396,9606.ENSP00000261667,9606.ENSP00000265062,9606.ENSP00000265986,9606.ENSP00000272317,9606.ENSP00000273047,9606.ENSP00000283195,9606.ENSP00000285968,9606.ENSP00000290158,9606.ENSP00000290921,9606.ENSP00000293379,9606.ENSP00000296585,…	VPS4B,NUP85,TSG101,APOE,NUP210,LAMTOR5,ITGAV,NUP133,KPNA3,RAB7A,IDE,RPS27A,RAB5A,RANBP2,NUP205,KPNB1,CTBP1,ITGA5,ITGA2,PPID,PCBP1,NUP93,CTBP2,EEA1,ROCK2,CHMP4A,LAMP1,CAV1,RPSA,VCP,PCBP2,TFRC,TPR,VTA1,F11R,HSP90AB1,KPNA6,VPS28,NUP160,SEC13,CDK1,RAE1,ITGB1,DEK,CHMP1A,CDC42,XPO1,RAB1A,UBA52,PDCD6IP,PPIA,IST1,HTATSF1,SLC1A5,RAN,MRC1,NUP62,DDX6,PHB
GO:0006900	Vesicle budding from membrane	30	103	0.49	2e-05	9606.ENSP00000227266,9606.ENSP00000230085,9606.ENSP00000240851,9606.ENSP00000263354,9606.ENSP00000264933,9606.ENSP00000292807,9606.ENSP00000303145,9606.ENSP00000324205,9606.ENSP00000330945,9606.ENSP00000338844,9606.ENSP00000343405,9606.ENSP00000345656,9606.ENSP00000346032,9606.ENSP00000347416,9606.ENSP00000358071,9606.ENSP00000362807,9606.ENSP00000373312,9606.ENSP00000373905,9606.ENSP00000377390,…	CTSC,SNX3,TFG,NAPA,PDCD6,AP2M1,TMED10,CHMP4A,TMED9,SEC23B,SEC24C,VAPA,ANXA2,AP3D1,SEC23IP,PEF1,SEC13,DNM2,PPP6R3,SEC31A,NSF,SEC24A,SAR1B,RAB1A,SCFD1,PPP6C,GOLGA2,VAPB,SEC24B,ARFGAP2
GO:0038096	Fc-gamma receptor signaling pathway involved in phagocytosis	21	73	0.49	0.00073	9606.ENSP00000215832,9606.ENSP00000228825,9606.ENSP00000262942,9606.ENSP00000263025,9606.ENSP00000263238,9606.ENSP00000294742,9606.ENSP00000300574,9606.ENSP00000335153,9606.ENSP00000341189,9606.ENSP00000348461,9606.ENSP00000352834,9606.ENSP00000360609,9606.ENSP00000362680,9606.ENSP00000365312,9606.ENSP00000367220,9606.ENSP00000376345,9606.ENSP00000383118,9606.ENSP00000388169,9606.ENSP00000458162,…	MAPK1,ARPC3,ARPC1A,MAPK3,ACTR3,ARPC5,CRK,HSP90AA1,PTK2,RAC1,MYO1C,HSP90AB1,SRC,ABI1,ACTR2,GRB2,CDC42,ARPC4,ACTG1,YES1,WASF2
GO:0051972	Regulation of telomerase activity	15	51	0.49	0.0059	9606.ENSP00000215832,9606.ENSP00000263025,9606.ENSP00000268058,9606.ENSP00000299300,9606.ENSP00000313199,9606.ENSP00000317334,9606.ENSP00000335153,9606.ENSP00000344456,9606.ENSP00000346694,9606.ENSP00000358563,9606.ENSP00000360609,9606.ENSP00000362680,9606.ENSP00000371419,9606.ENSP00000375978,9606.ENSP00000377958	MAPK1,MAPK3,PML,CCT2,HNRNPD,TCP1,HSP90AA1,CTNNB1,HNRNPA2B1,DKC1,HSP90AB1,SRC,PARP4,XRCC5,CCT4
GO:0021762	Substantia nigra development	13	45	0.49	0.0146	9606.ENSP00000246554,9606.ENSP00000263774,9606.ENSP00000264335,9606.ENSP00000277865,9606.ENSP00000291295,9606.ENSP00000358737,9606.ENSP00000358865,9606.ENSP00000376297,9606.ENSP00000377470,9606.ENSP00000383118,9606.ENSP00000389649,9606.ENSP00000400175,9606.ENSP00000445175	COX6B1,NDUFS3,YWHAE,GLUD1,CALM3,ATP5F1,INA,DYNLL1,CNP,CDC42,ATP5J,RHOA,LDHA
GO:0006695	Cholesterol biosynthetic process	12	41	0.49	0.0196	9606.ENSP00000003100,9606.ENSP00000236850,9606.ENSP00000253792,9606.ENSP00000285093,9606.ENSP00000339883,9606.ENSP00000346148,9606.ENSP00000349078,9606.ENSP00000356015,9606.ENSP00000358414,9606.ENSP00000359297,9606.ENSP00000370748,9606.ENSP00000410769	CYP51A1,APOA1,ACLY,ACAA2,LBR,PRKAA1,FDPS,ACAT2,HMGCS2,NSDHL,IDI1,CNBP
GO:1900026	Positive regulation of substrate adhesion-dependent cell spreading	11	38	0.49	0.031	9606.ENSP00000219022,9606.ENSP00000225698,9606.ENSP00000236850,9606.ENSP00000300574,9606.ENSP00000320866,9606.ENSP00000326888,9606.ENSP00000346300,9606.ENSP00000348461,9606.ENSP00000358866,9606.ENSP00000373905,9606.ENSP00000383118	OLFM4,C1QBP,APOA1,CRK,CALR,LIMS2,CRKL,RAC1,FLNA,DNM2,CDC42
GO:0046685	Response to arsenic-containing substance	10	34	0.49	0.0413	9606.ENSP00000225174,9606.ENSP00000229416,9606.ENSP00000254722,9606.ENSP00000264193,9606.ENSP00000341826,9606.ENSP00000351777,9606.ENSP00000358727,9606.ENSP00000382840,9606.ENSP00000386894,9606.ENSP00000480421	PPIF,GCLC,SERPINF1,CPOX,HNRNPA1,VCP,GSTO1,DDX3X,RBM4,SRRT
GO:0051084	De novo posttranslational protein folding	10	34	0.49	0.0413	9606.ENSP00000216218,9606.ENSP00000233893,9606.ENSP00000254322,9606.ENSP00000259253,9606.ENSP00000297185,9606.ENSP00000299300,9606.ENSP00000314499,9606.ENSP00000318687,9606.ENSP00000379042,9606.ENSP00000432083	ST13,HSPE1,DNAJB1,UGGT1,HSPA9,CCT2,GAK,HSPH1,ERO1L,HSPA8
GO:0045055	Regulated exocytosis	200	697	0.48	2.2e-35	9606.ENSP00000054666,9606.ENSP00000161559,9606.ENSP00000199764,9606.ENSP00000215754,9606.ENSP00000215832,9606.ENSP00000216181,9606.ENSP00000216336,9606.ENSP00000217971,9606.ENSP00000219022,9606.ENSP00000219313,9606.ENSP00000220166,9606.ENSP00000222968,9606.ENSP00000223321,9606.ENSP00000225777,9606.ENSP00000226253,9606.ENSP00000226574,9606.ENSP00000227266,9606.ENSP00000228506,9606.ENSP00000228740,…	VAMP3,CEACAM1,CEACAM6,MIF,MAPK1,MYH9,CTSG,PGRMC1,OLFM4,PSMD7,CTSH,PDAP1,PSMA2,SYNGR2,ALDOC,NFKB1,CTSC,MLEC,LTA4H,MAPK14,HRG,CTSD,APOA1,CD97,C3,PYCARD,TUBA4A,COPB1,ACLY,LGALS3,CAB39,PSMB7,GGH,DNAJC13,ITGAV,HEXB,PSMD11,FAF2,PSMB1,COTL1,ERP44,LGALS3BP,NAPA,AGA,PSMD3,RAB10,KNG1,RAB7A,SRP14,IQGAP1,PFKL,SOD1,PSMA5,DYNC1LI1,LAMTOR1,FERMT3,OLA1,APP,STOM,CCT8,KPNB1,CALM3,PDXK,CSTB,ARPC5,NCSTN,CLEC3B,S100P…
GO:0002443	Leukocyte mediated immunity	183	641	0.48	4.78e-32	9606.ENSP00000161559,9606.ENSP00000199764,9606.ENSP00000215754,9606.ENSP00000215832,9606.ENSP00000216336,9606.ENSP00000217971,9606.ENSP00000219022,9606.ENSP00000219313,9606.ENSP00000220166,9606.ENSP00000222968,9606.ENSP00000223321,9606.ENSP00000223642,9606.ENSP00000224181,9606.ENSP00000225698,9606.ENSP00000226253,9606.ENSP00000226574,9606.ENSP00000227266,9606.ENSP00000228506,9606.ENSP00000228740,…	CEACAM1,CEACAM6,MIF,MAPK1,CTSG,PGRMC1,OLFM4,PSMD7,CTSH,PDAP1,PSMA2,C5,C8G,C1QBP,ALDOC,NFKB1,CTSC,MLEC,LTA4H,MAPK14,MSH2,MSH6,CTSD,CD97,C3,PYCARD,COPB1,ACLY,LGALS3,CRP,CAB39,PSMB7,GGH,DNAJC13,ITGAV,HEXB,PSMD11,FAF2,PSMB1,COTL1,ERP44,PRDX1,AGA,PSMD3,RAB10,RAB7A,C1RL,SRP14,IQGAP1,PFKL,PSMA5,DYNC1LI1,LAMTOR1,STOM,CCT8,KPNB1,PDXK,CSTB,ARPC5,NCSTN,S100P,APEH,FABP5,HPRT1,CCT2,PA2G4,GLB1,EEF2,PSMD1,PSMD2…
GO:0002274	Myeloid leukocyte activation	166	585	0.48	1.05e-28	9606.ENSP00000161559,9606.ENSP00000199764,9606.ENSP00000215754,9606.ENSP00000215832,9606.ENSP00000216336,9606.ENSP00000217971,9606.ENSP00000219022,9606.ENSP00000219313,9606.ENSP00000220166,9606.ENSP00000222968,9606.ENSP00000223321,9606.ENSP00000226253,9606.ENSP00000226574,9606.ENSP00000227266,9606.ENSP00000228506,9606.ENSP00000228740,9606.ENSP00000229795,9606.ENSP00000236671,9606.ENSP00000242786,…	CEACAM1,CEACAM6,MIF,MAPK1,CTSG,PGRMC1,OLFM4,PSMD7,CTSH,PDAP1,PSMA2,ALDOC,NFKB1,CTSC,MLEC,LTA4H,MAPK14,CTSD,CD97,C3,PYCARD,COPB1,ACLY,LGALS3,CAB39,PSMB7,GGH,DNAJC13,ITGAV,HEXB,PSMD11,FAF2,PSMB1,COTL1,ERP44,AGA,PSMD3,RAB10,RAB7A,SRP14,IQGAP1,PFKL,PSMA5,DYNC1LI1,LAMTOR1,APP,STOM,CCT8,KPNB1,PDXK,CSTB,ARPC5,NCSTN,S100P,APEH,FABP5,CCT2,PA2G4,GLB1,EEF2,PSMD1,PSMD2,RAB6A,ATAD3B,TOLLIP,PKM,IMPDH2,KARS,AP2…
GO:0002833	Positive regulation of response to biotic stimulus	70	247	0.48	6.87e-12	9606.ENSP00000044462,9606.ENSP00000157812,9606.ENSP00000210313,9606.ENSP00000215071,9606.ENSP00000215754,9606.ENSP00000216455,9606.ENSP00000216802,9606.ENSP00000217958,9606.ENSP00000219313,9606.ENSP00000223321,9606.ENSP00000226574,9606.ENSP00000232003,9606.ENSP00000242351,9606.ENSP00000247470,9606.ENSP00000256078,9606.ENSP00000259457,9606.ENSP00000261303,9606.ENSP00000261427,9606.ENSP00000261479,…	PSMA4,PSMC4,PSMD5,PSMD8,MIF,PSMA3,PSME2,PSMD10,PSMD7,PSMA2,NFKB1,HRG,ZC3HAV1,PYCARD,KRAS,PSMB7,PSMC1,UBE2K,PSMA6,PSMD11,PSMB1,MAPK3,PSMD3,PSMA5,NONO,PSMB4,PSME3,HMGB2,PSMD1,PSMD2,PSMC5,RBM14,PRKDC,PAK2,LAMP1,PSMF1,PSPC1,HMGB1,PSMD12,SFPQ,PSMB10,XRCC6,MATR3,PSMB5,DHX9,IFI16,PSMD4,HMGB3,PSMA7,PSMB2,SRC,PSMB9,PSMB8,OPTN,PSME1,HSPD1,XRCC5,AP1G1,SIN3A,PSMD14,PSMC2,PSMD13,PSMC6,PRKCA,PSMD6,PSMD9,RPS19,…
GO:0030177	Positive regulation of wnt signaling pathway	52	182	0.48	5.63e-09	9606.ENSP00000044462,9606.ENSP00000157812,9606.ENSP00000210313,9606.ENSP00000215071,9606.ENSP00000216455,9606.ENSP00000216802,9606.ENSP00000217244,9606.ENSP00000217958,9606.ENSP00000219313,9606.ENSP00000223321,9606.ENSP00000226574,9606.ENSP00000259457,9606.ENSP00000261303,9606.ENSP00000261479,9606.ENSP00000261712,9606.ENSP00000262193,9606.ENSP00000264639,9606.ENSP00000271308,9606.ENSP00000290541,…	PSMA4,PSMC4,PSMD5,PSMD8,PSMA3,PSME2,CSNK2A1,PSMD10,PSMD7,PSMA2,NFKB1,PSMB7,PSMC1,PSMA6,PSMD11,PSMB1,PSMD3,PSMA5,PSMB4,PSME3,VPS35,PSMD1,PSMD2,PSMC5,CCAR2,RUVBL1,PPM1A,PSMF1,CAV1,PSMD12,PSMB10,VCP,PSMB5,PSMD4,PSMA7,PSMB2,SRC,PSMB9,PSMB8,PSME1,JUP,ILK,DDX3X,PSMD14,PSMC2,PSMD13,PSMC6,TBL1XR1,PSMD6,PSMD9,PSMC3,PSMB3
GO:0090090	Negative regulation of canonical wnt signaling pathway	52	183	0.48	6.58e-09	9606.ENSP00000044462,9606.ENSP00000157812,9606.ENSP00000210313,9606.ENSP00000215071,9606.ENSP00000216455,9606.ENSP00000216802,9606.ENSP00000217289,9606.ENSP00000217958,9606.ENSP00000219313,9606.ENSP00000223321,9606.ENSP00000229795,9606.ENSP00000252486,9606.ENSP00000259457,9606.ENSP00000261303,9606.ENSP00000261479,9606.ENSP00000261712,9606.ENSP00000262193,9606.ENSP00000262613,9606.ENSP00000264639,…	PSMA4,PSMC4,PSMD5,PSMD8,PSMA3,PSME2,FERMT1,PSMD10,PSMD7,PSMA2,MAPK14,APOE,PSMB7,PSMC1,PSMA6,PSMD11,PSMB1,SLC9A3R1,PSMD3,PSMA5,APP,PSMB4,PSME3,PSMD1,PSMD2,PSMC5,PSMF1,CAV1,PSMD12,PSMB10,PSMB5,PSMD4,PSMA7,STK4,PSMB2,HDAC1,PSMB9,PSMB8,PSME1,G3BP1,CTNND1,PSMD14,PSMC2,PSMD13,PSMC6,PSMD6,CSNK1A1,PSMD9,PFDN5,RUVBL2,PSMC3,PSMB3
GO:2001244	Positive regulation of intrinsic apoptotic signaling pathway	17	60	0.48	0.0038	9606.ENSP00000223136,9606.ENSP00000262613,9606.ENSP00000270142,9606.ENSP00000278572,9606.ENSP00000318176,9606.ENSP00000318822,9606.ENSP00000339095,9606.ENSP00000339191,9606.ENSP00000349748,9606.ENSP00000362057,9606.ENSP00000363676,9606.ENSP00000392330,9606.ENSP00000418770,9606.ENSP00000426909,9606.ENSP00000435210,9606.ENSP00000449089,9606.ENSP00000463784	FIS1,SLC9A3R1,SOD1,RPS3,PRKRA,BID,RPS7,CAV1,SFPQ,NOX1,RPL11,BCAP31,PARK7,GNB2L1,BCLAF1,DNM1L,RPL26
GO:0044273	Sulfur compound catabolic process	16	56	0.48	0.0051	9606.ENSP00000052754,9606.ENSP00000217426,9606.ENSP00000261416,9606.ENSP00000265077,9606.ENSP00000265838,9606.ENSP00000266718,9606.ENSP00000268097,9606.ENSP00000306920,9606.ENSP00000312506,9606.ENSP00000327336,9606.ENSP00000343924,9606.ENSP00000347041,9606.ENSP00000376807,9606.ENSP00000380402,9606.ENSP00000385828,9606.ENSP00000387654	DCN,AHCY,HEXB,VCAN,ACAT1,LUM,HEXA,GLB1,CSPG4,BGN,PRELP,FMOD,DPEP1,MPST,TST,PCYOX1
GO:1900024	Regulation of substrate adhesion-dependent cell spreading	15	53	0.48	0.0081	9606.ENSP00000219022,9606.ENSP00000225698,9606.ENSP00000236850,9606.ENSP00000300574,9606.ENSP00000320866,9606.ENSP00000326888,9606.ENSP00000331544,9606.ENSP00000341189,9606.ENSP00000346300,9606.ENSP00000348461,9606.ENSP00000358866,9606.ENSP00000364585,9606.ENSP00000373905,9606.ENSP00000383118,9606.ENSP00000394496	OLFM4,C1QBP,APOA1,CRK,CALR,LIMS2,FBLN1,PTK2,CRKL,RAC1,FLNA,RCC2,DNM2,CDC42,CORO1C
GO:0046031	ADP metabolic process	14	49	0.48	0.0109	9606.ENSP00000226253,9606.ENSP00000229239,9606.ENSP00000229270,9606.ENSP00000234590,9606.ENSP00000269848,9606.ENSP00000290573,9606.ENSP00000312250,9606.ENSP00000320171,9606.ENSP00000346921,9606.ENSP00000362271,9606.ENSP00000362413,9606.ENSP00000371230,9606.ENSP00000405573,9606.ENSP00000445175	ALDOC,GAPDH,TPI1,ENO1,PFKL,HK2,ADPGK,PKM,AK2,AK1,PGK1,AK3,GPI,LDHA
GO:0006220	Pyrimidine nucleotide metabolic process	13	46	0.48	0.0171	9606.ENSP00000219302,9606.ENSP00000232607,9606.ENSP00000245552,9606.ENSP00000264705,9606.ENSP00000318868,9606.ENSP00000322524,9606.ENSP00000337060,9606.ENSP00000349576,9606.ENSP00000360939,9606.ENSP00000361512,9606.ENSP00000370376,9606.ENSP00000371230,9606.ENSP00000376886	NME3,UMPS,NT5C,CAD,SHMT1,DCTPP1,NME1,DCTD,CMPK1,PRPS1,DUT,AK3,NME1-NME2
GO:0019985	Translesion synthesis	12	42	0.48	0.023	9606.ENSP00000254719,9606.ENSP00000263202,9606.ENSP00000272317,9606.ENSP00000287156,9606.ENSP00000323889,9606.ENSP00000331487,9606.ENSP00000351777,9606.ENSP00000363017,9606.ENSP00000368458,9606.ENSP00000388107,9606.ENSP00000457411,9606.ENSP00000475924	RPA1,UFD1L,RPS27A,UBE2L6,TRIM25,NPLOC4,VCP,RPA2,PCNA,UBA52,USP10,POLDIP2
GO:0098761	Cellular response to interleukin-7	12	42	0.48	0.023	9606.ENSP00000236959,9606.ENSP00000262030,9606.ENSP00000300289,9606.ENSP00000333277,9606.ENSP00000341208,9606.ENSP00000346300,9606.ENSP00000350708,9606.ENSP00000352252,9606.ENSP00000357189,9606.ENSP00000361626,9606.ENSP00000373620,9606.ENSP00000376753	ATIC,ATP5B,PDIA3,HIST2H3D,STAT5A,CRKL,RAD23B,HIST1H3J,HDGF,YBX1,HSPD1,GIPC1
GO:0009163	Nucleoside biosynthetic process	11	39	0.48	0.0359	9606.ENSP00000219302,9606.ENSP00000232607,9606.ENSP00000264705,9606.ENSP00000286621,9606.ENSP00000298556,9606.ENSP00000321584,9606.ENSP00000337060,9606.ENSP00000367615,9606.ENSP00000376886,9606.ENSP00000396452,9606.ENSP00000419851	NME3,UMPS,CAD,ADK,HPRT1,IMPDH2,NME1,APRT,NME1-NME2,HDHD1,GMPS
GO:0006886	Intracellular protein transport	280	999	0.47	5.15e-49	9606.ENSP00000000412,9606.ENSP00000215570,9606.ENSP00000216034,9606.ENSP00000219169,9606.ENSP00000221418,9606.ENSP00000221566,9606.ENSP00000222247,9606.ENSP00000223136,9606.ENSP00000223641,9606.ENSP00000225430,9606.ENSP00000229340,9606.ENSP00000229390,9606.ENSP00000230050,9606.ENSP00000238112,9606.ENSP00000244020,9606.ENSP00000245544,9606.ENSP00000245838,9606.ENSP00000249269,9606.ENSP00000249923,…	M6PR,TIMM13,TOMM22,NUTF2,ECH1,SGTA,RPL18A,FIS1,SEC61B,RPL19,RAB35,SRSF9,RPS12,CPSF3,SRSF6,NUP85,THOC2,PMPCB,COPB1,AP1M2,RPS16,XPO7,VPS25,NUP210,ARF3,COG3,SRSF1,RPL35,ARL3,NUP133,IPO5,ARL1,KPNA3,ERP29,SNX1,FAF2,TRAM1,RPL8,RAB2A,CSE1L,UFD1L,NAPA,SPCS2,ARCN1,AGPS,YWHAE,RAB10,PDCD6,GRPEL1,RAB7A,XPO5,TNPO3,IDE,SRP14,PML,EIF4A3,TIMM44,RPS11,RPS27A,RAB5A,RPS3,HNRNPU,RANBP2,TOMM70A,NUP205,AIFM1,DDX19B,AP…
GO:0033365	Protein localization to organelle	207	743	0.47	3.57e-35	9606.ENSP00000000412,9606.ENSP00000215570,9606.ENSP00000216034,9606.ENSP00000219169,9606.ENSP00000221418,9606.ENSP00000221566,9606.ENSP00000222247,9606.ENSP00000223136,9606.ENSP00000223641,9606.ENSP00000225430,9606.ENSP00000229340,9606.ENSP00000230050,9606.ENSP00000233146,9606.ENSP00000245544,9606.ENSP00000249269,9606.ENSP00000251453,9606.ENSP00000253794,9606.ENSP00000254719,9606.ENSP00000256644,…	M6PR,TIMM13,TOMM22,NUTF2,ECH1,SGTA,RPL18A,FIS1,SEC61B,RPL19,RAB35,RPS12,MSH2,NUP85,PMPCB,RPS16,VPS25,RPA1,LAMTOR5,COG3,RPL35,ARL3,OSBPL8,NUP133,IPO5,ARL1,KPNA3,TRAM1,RPL8,CSE1L,PACSIN2,SPCS2,AGPS,YWHAE,RAB10,GRPEL1,RAB7A,TNPO3,IDE,SRP14,PML,TIMM44,RPS11,RPS27A,RPS3,FAM21A,HNRNPU,RANBP2,TOMM70A,AIFM1,APPL1,KPNB1,HK2,CALM3,ACOX1,RPS23,RAD21,ARF6,VPS35,TPP1,MAPRE2,RPS9,HSPA4,MTCH2,SRP9,ARF4,RPL13,RP…
GO:0072657	Protein localization to membrane	137	495	0.47	1.03e-22	9606.ENSP00000054666,9606.ENSP00000070846,9606.ENSP00000215570,9606.ENSP00000216034,9606.ENSP00000220325,9606.ENSP00000221566,9606.ENSP00000222247,9606.ENSP00000223641,9606.ENSP00000225430,9606.ENSP00000230050,9606.ENSP00000234160,9606.ENSP00000251453,9606.ENSP00000252486,9606.ENSP00000259469,9606.ENSP00000260746,9606.ENSP00000261769,9606.ENSP00000262213,9606.ENSP00000262375,9606.ENSP00000262584,…	VAMP3,PKP2,TIMM13,TOMM22,EHD4,SGTA,RPL18A,SEC61B,RPL19,RPS12,GORASP2,RPS16,APOE,RPL35,ARL3,CDH1,TRAM1,DNAJA3,RPL8,SLC9A3R1,EHD2,RAB10,SRP14,RPS11,RPS27A,LIN7C,RPS3,ATP1B3,CALM3,SLMAP,RPS23,VPS35,RAB8A,RPS9,HSPA4,FNTA,SRP9,ARL6IP1,RPL13,RPL15,RPL38,RPL4,GAK,ROCK2,RPS15A,BID,RPLP2,CHMP4A,HGS,RAB11B,BSG,RFTN1,HSP90AA1,RPS7,CAV1,RPL7,RPS2,FERMT2,EPB41L3,SAMM50,RPS21,RPL3,RPL27A,RPL21,ANXA2,RPS17,RPSA…
GO:0002253	Activation of immune response	106	385	0.47	2.78e-17	9606.ENSP00000044462,9606.ENSP00000157812,9606.ENSP00000210313,9606.ENSP00000215071,9606.ENSP00000215832,9606.ENSP00000216455,9606.ENSP00000216802,9606.ENSP00000217958,9606.ENSP00000219313,9606.ENSP00000220003,9606.ENSP00000223321,9606.ENSP00000223642,9606.ENSP00000224181,9606.ENSP00000225698,9606.ENSP00000226279,9606.ENSP00000226574,9606.ENSP00000228825,9606.ENSP00000245907,9606.ENSP00000247470,…	PSMA4,PSMC4,PSMD5,PSMD8,MAPK1,PSMA3,PSME2,PSMD10,PSMD7,CSK,PSMA2,C5,C8G,C1QBP,CD38,NFKB1,ARPC3,C3,PYCARD,CRP,KRAS,CFHR5,PSMB7,PSMC1,PSMA6,PSMD11,PSMB1,ARPC1A,MAPK3,ACTR3,PSMD3,C1RL,PSMA5,NONO,PSMB4,PSME3,ARPC5,CRK,PSMD1,PSMD2,PSMC5,RBM14,PRKDC,KHDRBS1,PAK2,UBE2N,C7,CFD,RFTN1,HSP90AA1,PSMF1,PTK2,PSPC1,HMGB1,CRKL,PSMD12,RAC1,STOML2,SFPQ,PSMB10,XRCC6,MYO1C,HLA-DRB1,MATR3,C8A,PSMB5,CFH,IFI16,PSMD4,PS…
GO:0006163	Purine nucleotide metabolic process	92	329	0.47	2.72e-15	9606.ENSP00000205402,9606.ENSP00000215375,9606.ENSP00000215882,9606.ENSP00000216044,9606.ENSP00000216605,9606.ENSP00000219302,9606.ENSP00000226253,9606.ENSP00000229239,9606.ENSP00000229270,9606.ENSP00000234590,9606.ENSP00000236959,9606.ENSP00000245552,9606.ENSP00000253382,9606.ENSP00000253792,9606.ENSP00000262030,9606.ENSP00000262878,9606.ENSP00000265174,9606.ENSP00000265838,9606.ENSP00000268835,…	DLD,ATP5D,SLC25A1,GTPBP1,MTHFD1,NME3,ALDOC,GAPDH,TPI1,ENO1,ATIC,NT5C,ACSS2,ACLY,ATP5B,SAMHD1,PAPSS1,ACAT1,PRPSAP2,PFKL,HSD17B12,DLAT,ADK,ACSM3,ATP5O,HK2,HPRT1,ATP5L,ATP5H,CBR4,HINT1,PDHB,SULT1B1,ADPGK,PFAS,ACSS1,CYC1,PKM,IMPDH2,NME1,NUDT4,NT5C2,MCCC2,AK2,ACSL5,STOML2,ATP5C1,ACSL3,SULT1A4,PNP,ADSS,MPC2,HMGCS2,ATP5F1,GNAI3,CMPK1,PRPS1,PPCS,AK1,PGK1,HMGCL,CASK,APRT,SUCLA2,ACOT9,ITPA,AK3,NME1-NME2,PR…
GO:0019693	Ribose phosphate metabolic process	92	329	0.47	2.72e-15	9606.ENSP00000205402,9606.ENSP00000215375,9606.ENSP00000215882,9606.ENSP00000216044,9606.ENSP00000219302,9606.ENSP00000226253,9606.ENSP00000229239,9606.ENSP00000229270,9606.ENSP00000232607,9606.ENSP00000234590,9606.ENSP00000236959,9606.ENSP00000253382,9606.ENSP00000253792,9606.ENSP00000262030,9606.ENSP00000264705,9606.ENSP00000265174,9606.ENSP00000265838,9606.ENSP00000268835,9606.ENSP00000269848,…	DLD,ATP5D,SLC25A1,GTPBP1,NME3,ALDOC,GAPDH,TPI1,UMPS,ENO1,ATIC,ACSS2,ACLY,ATP5B,CAD,PAPSS1,ACAT1,PRPSAP2,PFKL,HSD17B12,DLAT,ADK,ACSM3,ATP5O,HK2,HPRT1,ATP5L,ATP5H,CBR4,HINT1,PDHB,SULT1B1,ADPGK,PFAS,ACSS1,CYC1,PKM,IMPDH2,NME1,NUDT4,NT5C2,MCCC2,AK2,ACSL5,STOML2,ATP5C1,ACSL3,SULT1A4,ADSS,MPC2,HMGCS2,ATP5F1,GNAI3,CMPK1,PRPS1,PPCS,AK1,PGK1,HMGCL,CASK,APRT,SUCLA2,ACOT9,ITPA,AK3,NME1-NME2,PRPS2,ATP5A1,PAI…
GO:0045088	Regulation of innate immune response	84	301	0.47	6.36e-14	9606.ENSP00000044462,9606.ENSP00000157812,9606.ENSP00000161559,9606.ENSP00000210313,9606.ENSP00000215071,9606.ENSP00000216129,9606.ENSP00000216455,9606.ENSP00000216802,9606.ENSP00000217958,9606.ENSP00000219313,9606.ENSP00000223321,9606.ENSP00000226574,9606.ENSP00000247470,9606.ENSP00000252486,9606.ENSP00000256078,9606.ENSP00000259457,9606.ENSP00000261303,9606.ENSP00000261427,9606.ENSP00000261479,…	PSMA4,PSMC4,CEACAM1,PSMD5,PSMD8,TTLL12,PSMA3,PSME2,PSMD10,PSMD7,PSMA2,NFKB1,PYCARD,APOE,KRAS,PSMB7,PSMC1,UBE2K,PSMA6,PSMD11,PSMB1,DNAJA3,SAMHD1,PSMD3,PSMA5,NONO,APPL1,PSMB4,PSME3,HMGB2,ABCE1,ERAP1,CRK,PSMD1,PSMD2,PSMC5,RBM14,PRKDC,PAK2,LAMP1,PSMF1,SERPINB4,PSPC1,HMGB1,PSMD12,SFPQ,PSMB10,XRCC6,MATR3,STAT1,PSMB5,DHX9,IFI16,ADAR,PSMD4,HMGB3,PSMA7,HSP90AB1,PTPN1,PSMB2,SRC,PSMB9,PSMB8,PSME1,XRCC5,AP1G…
GO:0009150	Purine ribonucleotide metabolic process	84	303	0.47	8.66e-14	9606.ENSP00000205402,9606.ENSP00000215375,9606.ENSP00000215882,9606.ENSP00000216044,9606.ENSP00000219302,9606.ENSP00000226253,9606.ENSP00000229239,9606.ENSP00000229270,9606.ENSP00000234590,9606.ENSP00000236959,9606.ENSP00000253382,9606.ENSP00000253792,9606.ENSP00000262030,9606.ENSP00000265174,9606.ENSP00000265838,9606.ENSP00000269848,9606.ENSP00000278353,9606.ENSP00000280346,9606.ENSP00000286621,…	DLD,ATP5D,SLC25A1,GTPBP1,NME3,ALDOC,GAPDH,TPI1,ENO1,ATIC,ACSS2,ACLY,ATP5B,PAPSS1,ACAT1,PFKL,HSD17B12,DLAT,ADK,ACSM3,ATP5O,HK2,HPRT1,ATP5L,ATP5H,CBR4,HINT1,PDHB,SULT1B1,ADPGK,PFAS,ACSS1,CYC1,PKM,IMPDH2,NME1,NUDT4,NT5C2,MCCC2,AK2,ACSL5,STOML2,ATP5C1,ACSL3,SULT1A4,ADSS,MPC2,HMGCS2,ATP5F1,GNAI3,PPCS,AK1,PGK1,HMGCL,CASK,APRT,SUCLA2,ACOT9,ITPA,AK3,NME1-NME2,ATP5A1,PAICS,ATP5J,PPT1,SLC25A13,RHOA,ACSF2,G…
GO:0050851	Antigen receptor-mediated signaling pathway	55	199	0.47	4.78e-09	9606.ENSP00000044462,9606.ENSP00000157812,9606.ENSP00000210313,9606.ENSP00000215071,9606.ENSP00000215832,9606.ENSP00000216455,9606.ENSP00000216802,9606.ENSP00000217958,9606.ENSP00000219313,9606.ENSP00000220003,9606.ENSP00000223321,9606.ENSP00000226279,9606.ENSP00000226574,9606.ENSP00000259457,9606.ENSP00000261303,9606.ENSP00000261479,9606.ENSP00000261712,9606.ENSP00000262193,9606.ENSP00000264639,…	PSMA4,PSMC4,PSMD5,PSMD8,MAPK1,PSMA3,PSME2,PSMD10,PSMD7,CSK,PSMA2,CD38,NFKB1,PSMB7,PSMC1,PSMA6,PSMD11,PSMB1,PSMD3,PSMA5,PSMB4,PSME3,PSMD1,PSMD2,PSMC5,KHDRBS1,PAK2,UBE2N,RFTN1,PSMF1,CRKL,PSMD12,STOML2,PSMB10,HLA-DRB1,PSMB5,PSMD4,PSMA7,PSMB2,PSMB9,PSMB8,PSME1,HLA-DRA,HLA-A,PSMD14,PSMC2,PTPN6,PSMD13,PSMC6,HLA-DPB1,EIF2B1,PSMD6,PSMD9,PSMC3,PSMB3
GO:0006888	Endoplasmic reticulum to golgi vesicle-mediated transport	54	195	0.47	6.56e-09	9606.ENSP00000225724,9606.ENSP00000227266,9606.ENSP00000240851,9606.ENSP00000249923,9606.ENSP00000258198,9606.ENSP00000258654,9606.ENSP00000262646,9606.ENSP00000263168,9606.ENSP00000263354,9606.ENSP00000264028,9606.ENSP00000264933,9606.ENSP00000273130,9606.ENSP00000303145,9606.ENSP00000306010,9606.ENSP00000325002,9606.ENSP00000329419,9606.ENSP00000330945,9606.ENSP00000338844,9606.ENSP00000343405,…	GOSR1,CTSC,TFG,COPB1,DYNC1LI2,COG3,RAB2A,CAPZA1,NAPA,ARCN1,PDCD6,DYNC1LI1,TMED10,ARF4,COPG1,COPB2,TMED9,SEC23B,SEC24C,VAPA,SPTBN1,VCP,DCTN1,COPA,SPTA1,SEC23IP,ACTR1A,TMED5,SPTAN1,PEF1,SEC13,DYNLL1,PPP6R3,PROS1,SEC31A,NSF,SEC24A,SAR1B,RAB1A,SCFD1,PPP6C,BCAP31,CAPZB,COPG2,TMED7,DCTN2,GOLGA2,VAPB,SEC24B,ARFGAP2,COPZ1,SPTB,DYNLL2,HYOU1
GO:1905330	Regulation of morphogenesis of an epithelium	50	180	0.47	2.62e-08	9606.ENSP00000044462,9606.ENSP00000157812,9606.ENSP00000210313,9606.ENSP00000215071,9606.ENSP00000216455,9606.ENSP00000216802,9606.ENSP00000217958,9606.ENSP00000219313,9606.ENSP00000223321,9606.ENSP00000259457,9606.ENSP00000261303,9606.ENSP00000261479,9606.ENSP00000261712,9606.ENSP00000262193,9606.ENSP00000264639,9606.ENSP00000271308,9606.ENSP00000290541,9606.ENSP00000292807,9606.ENSP00000293362,…	PSMA4,PSMC4,PSMD5,PSMD8,PSMA3,PSME2,PSMD10,PSMD7,PSMA2,PSMB7,PSMC1,PSMA6,PSMD11,PSMB1,PSMD3,PSMA5,PSMB4,AP2M1,PSME3,PSMD1,PSMD2,PSMC5,AP2A2,PSMF1,CTNNB1,PSMD12,RAC1,PSMB10,STAT1,PSMB5,PSMD4,PSMA7,PSMB2,PSMB9,PSMB8,PSME1,CDC42,PSMD14,PSMC2,PSMD13,RHOA,PSMC6,PSMD6,SEC24B,PSMD9,PHB2,CLTC,PSMC3,AP2B1,PSMB3
GO:0051170	Import into nucleus	33	118	0.47	1.28e-05	9606.ENSP00000215829,9606.ENSP00000219169,9606.ENSP00000245544,9606.ENSP00000261396,9606.ENSP00000261574,9606.ENSP00000261667,9606.ENSP00000262982,9606.ENSP00000265388,9606.ENSP00000268058,9606.ENSP00000283195,9606.ENSP00000288266,9606.ENSP00000290158,9606.ENSP00000300413,9606.ENSP00000310668,9606.ENSP00000323867,9606.ENSP00000334373,9606.ENSP00000336712,9606.ENSP00000341826,9606.ENSP00000342374,…	SNRPD3,NUTF2,NUP85,NUP133,IPO5,KPNA3,CSE1L,TNPO3,PML,RANBP2,APPL1,KPNB1,SNRPD1,NUP93,PRKAG1,KPNA4,TNPO1,HNRNPA1,SNRPD2,IPO4,IPO9,TPR,LMNA,ADAR,KPNA6,IPO7,ELAVL1,SNRPB,RPL23,PHB2,RAN,NUP62,RAB18
GO:0006006	Glucose metabolic process	32	116	0.47	2.32e-05	9606.ENSP00000215882,9606.ENSP00000216780,9606.ENSP00000225665,9606.ENSP00000226253,9606.ENSP00000229239,9606.ENSP00000229270,9606.ENSP00000229795,9606.ENSP00000234590,9606.ENSP00000245206,9606.ENSP00000265641,9606.ENSP00000267814,9606.ENSP00000269848,9606.ENSP00000280346,9606.ENSP00000290573,9606.ENSP00000297258,9606.ENSP00000303356,9606.ENSP00000307241,9606.ENSP00000308610,9606.ENSP00000312250,…	SLC25A1,PCK2,SLC25A11,ALDOC,GAPDH,TPI1,MAPK14,ENO1,GOT2,CPT1A,SORD,PFKL,DLAT,HK2,FABP5,DCXR,PDHB,GPD2,ADPGK,PKM,MDH2,PRKAA1,SLC39A14,AKR1A1,PGK1,PGM2,PGM5,SLC25A12,SLC25A13,GPI,FBP1,SLC25A10
GO:0009116	Nucleoside metabolic process	29	104	0.47	5.81e-05	9606.ENSP00000216044,9606.ENSP00000217426,9606.ENSP00000219302,9606.ENSP00000232607,9606.ENSP00000236959,9606.ENSP00000245552,9606.ENSP00000264705,9606.ENSP00000268835,9606.ENSP00000286621,9606.ENSP00000298556,9606.ENSP00000321584,9606.ENSP00000337060,9606.ENSP00000339479,9606.ENSP00000354532,9606.ENSP00000358867,9606.ENSP00000361512,9606.ENSP00000367408,9606.ENSP00000367615,9606.ENSP00000371230,…	GTPBP1,AHCY,NME3,UMPS,ATIC,NT5C,CAD,PRPSAP2,ADK,HPRT1,IMPDH2,NME1,NT5C2,PNP,GNAI3,PRPS1,CASK,APRT,AK3,NME1-NME2,PRPS2,HDHD1,RHOA,DERA,RAB23,GMPS,TJP2,RAN,ERH
GO:0009062	Fatty acid catabolic process	26	93	0.47	0.00017	9606.ENSP00000216780,9606.ENSP00000220764,9606.ENSP00000221418,9606.ENSP00000242592,9606.ENSP00000263383,9606.ENSP00000265641,9606.ENSP00000265838,9606.ENSP00000285093,9606.ENSP00000293217,9606.ENSP00000301729,9606.ENSP00000325136,9606.ENSP00000333664,9606.ENSP00000346173,9606.ENSP00000356015,9606.ENSP00000357535,9606.ENSP00000359233,9606.ENSP00000360541,9606.ENSP00000360569,9606.ENSP00000365462,…	PCK2,DECR1,ECH1,ACADS,ILVBL,CPT1A,ACAT1,ACAA2,ACOX1,ECI1,HADHB,ACAA1,ETFB,ACAT2,ECHS1,ABCD3,CPT2,SCP2,PCCA,AMACR,IVD,PCCB,HSD17B4,ECHDC1,ETFA,HADH
GO:0009132	Nucleoside diphosphate metabolic process	22	80	0.47	0.00084	9606.ENSP00000219302,9606.ENSP00000226253,9606.ENSP00000229239,9606.ENSP00000229270,9606.ENSP00000234590,9606.ENSP00000269848,9606.ENSP00000290573,9606.ENSP00000312250,9606.ENSP00000320171,9606.ENSP00000337060,9606.ENSP00000346921,9606.ENSP00000360939,9606.ENSP00000362271,9606.ENSP00000362413,9606.ENSP00000367408,9606.ENSP00000371230,9606.ENSP00000376886,9606.ENSP00000405573,9606.ENSP00000419628,…	NME3,ALDOC,GAPDH,TPI1,ENO1,PFKL,HK2,ADPGK,PKM,NME1,AK2,CMPK1,AK1,PGK1,CASK,AK3,NME1-NME2,GPI,NUDT5,NUDT16,TJP2,LDHA
GO:0006283	Transcription-coupled nucleotide-excision repair	21	75	0.47	0.00099	9606.ENSP00000227524,9606.ENSP00000254719,9606.ENSP00000263274,9606.ENSP00000264389,9606.ENSP00000268717,9606.ENSP00000272317,9606.ENSP00000299259,9606.ENSP00000301764,9606.ENSP00000304102,9606.ENSP00000343535,9606.ENSP00000346340,9606.ENSP00000350512,9606.ENSP00000362710,9606.ENSP00000363017,9606.ENSP00000368458,9606.ENSP00000370625,9606.ENSP00000376167,9606.ENSP00000388107,9606.ENSP00000415536,…	PRPF19,RPA1,LIG1,COPS4,COPS3,RPS27A,COPS2,DDB1,COPS6,USP7,COPS8,COPS5,COPS7B,RPA2,PCNA,POLR2B,GPS1,UBA52,POLR2H,TCEA1,POLR2A
GO:1901880	Negative regulation of protein depolymerization	18	65	0.47	0.0032	9606.ENSP00000248444,9606.ENSP00000259365,9606.ENSP00000263168,9606.ENSP00000263867,9606.ENSP00000264758,9606.ENSP00000296755,9606.ENSP00000303908,9606.ENSP00000308753,9606.ENSP00000348381,9606.ENSP00000349259,9606.ENSP00000356257,9606.ENSP00000357129,9606.ENSP00000361824,9606.ENSP00000362924,9606.ENSP00000378400,9606.ENSP00000401010,9606.ENSP00000449428,9606.ENSP00000451752	VIL1,TMOD1,CAPZA1,CAPG,ADD1,MAP1B,TWF2,TMOD3,ADD3,SPTBN1,LMOD1,SPTA1,SPTAN1,GSN,LIMA1,CAPZB,TWF1,SPTB
GO:0009179	Purine ribonucleoside diphosphate metabolic process	17	61	0.47	0.0044	9606.ENSP00000226253,9606.ENSP00000229239,9606.ENSP00000229270,9606.ENSP00000234590,9606.ENSP00000269848,9606.ENSP00000290573,9606.ENSP00000312250,9606.ENSP00000320171,9606.ENSP00000346921,9606.ENSP00000362271,9606.ENSP00000362413,9606.ENSP00000367408,9606.ENSP00000371230,9606.ENSP00000405573,9606.ENSP00000422375,9606.ENSP00000438262,9606.ENSP00000445175	ALDOC,GAPDH,TPI1,ENO1,PFKL,HK2,ADPGK,PKM,AK2,AK1,PGK1,CASK,AK3,GPI,NUDT16,TJP2,LDHA
GO:0006165	Nucleoside diphosphate phosphorylation	16	58	0.47	0.0069	9606.ENSP00000219302,9606.ENSP00000226253,9606.ENSP00000229239,9606.ENSP00000229270,9606.ENSP00000234590,9606.ENSP00000269848,9606.ENSP00000290573,9606.ENSP00000312250,9606.ENSP00000320171,9606.ENSP00000337060,9606.ENSP00000360939,9606.ENSP00000362271,9606.ENSP00000362413,9606.ENSP00000376886,9606.ENSP00000405573,9606.ENSP00000445175	NME3,ALDOC,GAPDH,TPI1,ENO1,PFKL,HK2,ADPGK,PKM,NME1,CMPK1,AK1,PGK1,NME1-NME2,GPI,LDHA
GO:0032781	Positive regulation of atpase activity	16	58	0.47	0.0069	9606.ENSP00000037243,9606.ENSP00000216479,9606.ENSP00000233146,9606.ENSP00000234420,9606.ENSP00000254322,9606.ENSP00000263354,9606.ENSP00000283179,9606.ENSP00000286371,9606.ENSP00000314030,9606.ENSP00000351022,9606.ENSP00000356520,9606.ENSP00000356790,9606.ENSP00000369127,9606.ENSP00000376297,9606.ENSP00000419665,9606.ENSP00000477310	GABARAPL2,AHSA1,MSH2,MSH6,DNAJB1,NAPA,HNRNPU,ATP1B3,DNAJA2,TPM1,DHX9,ATP1B1,DNAJA1,DYNLL1,SSBP1,DYNLL2
GO:0046148	Pigment biosynthetic process	14	50	0.47	0.0126	9606.ENSP00000216605,9606.ENSP00000217971,9606.ENSP00000246337,9606.ENSP00000264193,9606.ENSP00000298556,9606.ENSP00000313490,9606.ENSP00000318868,9606.ENSP00000361512,9606.ENSP00000367615,9606.ENSP00000381386,9606.ENSP00000382595,9606.ENSP00000419851,9606.ENSP00000444561,9606.ENSP00000478253	MTHFD1,PGRMC1,UROD,CPOX,HPRT1,PFAS,SHMT1,PRPS1,APRT,DDT,PAICS,GMPS,TMEM14C,MTHFD1L
GO:0006096	Glycolytic process	11	40	0.47	0.0411	9606.ENSP00000226253,9606.ENSP00000229239,9606.ENSP00000229270,9606.ENSP00000234590,9606.ENSP00000269848,9606.ENSP00000290573,9606.ENSP00000312250,9606.ENSP00000320171,9606.ENSP00000362413,9606.ENSP00000405573,9606.ENSP00000445175	ALDOC,GAPDH,TPI1,ENO1,PFKL,HK2,ADPGK,PKM,PGK1,GPI,LDHA
GO:0034381	Plasma lipoprotein particle clearance	11	40	0.47	0.0411	9606.ENSP00000227667,9606.ENSP00000236850,9606.ENSP00000252486,9606.ENSP00000292807,9606.ENSP00000327694,9606.ENSP00000356969,9606.ENSP00000375836,9606.ENSP00000442464,9606.ENSP00000465356,9606.ENSP00000479606,9606.ENSP00000482835	APOC3,APOA1,APOE,AP2M1,AP2A2,APOA2,HDLBP,NCEH1,APOC1,CLTC,AP2B1
GO:0002263	Cell activation involved in immune response	170	630	0.46	2.55e-27	9606.ENSP00000027335,9606.ENSP00000161559,9606.ENSP00000199764,9606.ENSP00000215754,9606.ENSP00000215832,9606.ENSP00000215909,9606.ENSP00000216336,9606.ENSP00000217971,9606.ENSP00000219022,9606.ENSP00000219313,9606.ENSP00000220166,9606.ENSP00000222968,9606.ENSP00000223321,9606.ENSP00000226253,9606.ENSP00000226574,9606.ENSP00000227266,9606.ENSP00000228506,9606.ENSP00000228740,9606.ENSP00000229795,…	CDH17,CEACAM1,CEACAM6,MIF,MAPK1,LGALS1,CTSG,PGRMC1,OLFM4,PSMD7,CTSH,PDAP1,PSMA2,ALDOC,NFKB1,CTSC,MLEC,LTA4H,MAPK14,MSH2,MSH6,CTSD,CD97,C3,PYCARD,COPB1,ACLY,LGALS3,CAB39,PSMB7,GGH,DNAJC13,ITGAV,HEXB,PSMD11,FAF2,PSMB1,COTL1,ERP44,AGA,PSMD3,RAB10,RAB7A,SRP14,IQGAP1,PFKL,PSMA5,DYNC1LI1,LAMTOR1,APP,STOM,CCT8,KPNB1,PDXK,CSTB,ARPC5,NCSTN,S100P,APEH,FABP5,CCT2,PA2G4,GLB1,EEF2,PSMD1,PSMD2,RAB6A,ATAD3B,TOL…
GO:0002366	Leukocyte activation involved in immune response	169	626	0.46	3.58e-27	9606.ENSP00000027335,9606.ENSP00000161559,9606.ENSP00000199764,9606.ENSP00000215754,9606.ENSP00000215832,9606.ENSP00000215909,9606.ENSP00000216336,9606.ENSP00000217971,9606.ENSP00000219022,9606.ENSP00000219313,9606.ENSP00000220166,9606.ENSP00000222968,9606.ENSP00000223321,9606.ENSP00000226253,9606.ENSP00000226574,9606.ENSP00000227266,9606.ENSP00000228506,9606.ENSP00000228740,9606.ENSP00000229795,…	CDH17,CEACAM1,CEACAM6,MIF,MAPK1,LGALS1,CTSG,PGRMC1,OLFM4,PSMD7,CTSH,PDAP1,PSMA2,ALDOC,NFKB1,CTSC,MLEC,LTA4H,MAPK14,MSH2,MSH6,CTSD,CD97,C3,PYCARD,COPB1,ACLY,LGALS3,CAB39,PSMB7,GGH,DNAJC13,ITGAV,HEXB,PSMD11,FAF2,PSMB1,COTL1,ERP44,AGA,PSMD3,RAB10,RAB7A,SRP14,IQGAP1,PFKL,PSMA5,DYNC1LI1,LAMTOR1,STOM,CCT8,KPNB1,PDXK,CSTB,ARPC5,NCSTN,S100P,APEH,FABP5,CCT2,PA2G4,GLB1,EEF2,PSMD1,PSMD2,RAB6A,ATAD3B,TOLLIP,…
GO:0006753	Nucleoside phosphate metabolic process	116	428	0.46	1.65e-18	9606.ENSP00000205402,9606.ENSP00000215375,9606.ENSP00000215832,9606.ENSP00000215882,9606.ENSP00000216044,9606.ENSP00000216605,9606.ENSP00000219302,9606.ENSP00000226253,9606.ENSP00000229239,9606.ENSP00000229270,9606.ENSP00000232607,9606.ENSP00000234590,9606.ENSP00000236959,9606.ENSP00000244043,9606.ENSP00000245552,9606.ENSP00000253382,9606.ENSP00000253792,9606.ENSP00000262030,9606.ENSP00000262878,…	DLD,ATP5D,MAPK1,SLC25A1,GTPBP1,MTHFD1,NME3,ALDOC,GAPDH,TPI1,UMPS,ENO1,ATIC,PTGIS,NT5C,ACSS2,ACLY,ATP5B,SAMHD1,CAD,PAPSS1,ACAT1,PRPSAP2,PFKL,HSD17B12,DLAT,ADK,ACSM3,ATP5O,HK2,HPRT1,ATP5L,RRM1,ATP5H,CBR4,HINT1,PDHB,SULT1B1,ADPGK,PFAS,ACSS1,CYC1,SHMT1,PKM,IMPDH2,DCTPP1,KARS,IDH2,NME1,NUDT4,NT5C2,MCCC2,AK2,ACSL5,STOML2,ATP5C1,DCTD,ACSL3,VCP,SULT1A4,RRM2,PNP,ADSS,MPC2,APOA1BP,LHPP,HMGCS2,ATP5F1,GNAI3,…
GO:0009117	Nucleotide metabolic process	115	422	0.46	1.68e-18	9606.ENSP00000205402,9606.ENSP00000215375,9606.ENSP00000215832,9606.ENSP00000215882,9606.ENSP00000216044,9606.ENSP00000216605,9606.ENSP00000219302,9606.ENSP00000226253,9606.ENSP00000229239,9606.ENSP00000229270,9606.ENSP00000232607,9606.ENSP00000234590,9606.ENSP00000236959,9606.ENSP00000244043,9606.ENSP00000245552,9606.ENSP00000253382,9606.ENSP00000253792,9606.ENSP00000262030,9606.ENSP00000262878,…	DLD,ATP5D,MAPK1,SLC25A1,GTPBP1,MTHFD1,NME3,ALDOC,GAPDH,TPI1,UMPS,ENO1,ATIC,PTGIS,NT5C,ACSS2,ACLY,ATP5B,SAMHD1,CAD,PAPSS1,ACAT1,PRPSAP2,PFKL,HSD17B12,DLAT,ADK,ACSM3,ATP5O,HK2,HPRT1,ATP5L,RRM1,ATP5H,CBR4,HINT1,PDHB,SULT1B1,ADPGK,PFAS,ACSS1,CYC1,SHMT1,PKM,IMPDH2,DCTPP1,KARS,IDH2,NME1,NUDT4,NT5C2,MCCC2,AK2,ACSL5,STOML2,ATP5C1,DCTD,ACSL3,VCP,SULT1A4,RRM2,PNP,ADSS,MPC2,APOA1BP,HMGCS2,ATP5F1,GNAI3,CMPK1…
GO:0009259	Ribonucleotide metabolic process	87	318	0.46	5.25e-14	9606.ENSP00000205402,9606.ENSP00000215375,9606.ENSP00000215882,9606.ENSP00000216044,9606.ENSP00000219302,9606.ENSP00000226253,9606.ENSP00000229239,9606.ENSP00000229270,9606.ENSP00000232607,9606.ENSP00000234590,9606.ENSP00000236959,9606.ENSP00000253382,9606.ENSP00000253792,9606.ENSP00000262030,9606.ENSP00000264705,9606.ENSP00000265174,9606.ENSP00000265838,9606.ENSP00000269848,9606.ENSP00000278353,…	DLD,ATP5D,SLC25A1,GTPBP1,NME3,ALDOC,GAPDH,TPI1,UMPS,ENO1,ATIC,ACSS2,ACLY,ATP5B,CAD,PAPSS1,ACAT1,PFKL,HSD17B12,DLAT,ADK,ACSM3,ATP5O,HK2,HPRT1,ATP5L,ATP5H,CBR4,HINT1,PDHB,SULT1B1,ADPGK,PFAS,ACSS1,CYC1,PKM,IMPDH2,NME1,NUDT4,NT5C2,MCCC2,AK2,ACSL5,STOML2,ATP5C1,ACSL3,SULT1A4,ADSS,MPC2,HMGCS2,ATP5F1,GNAI3,CMPK1,PPCS,AK1,PGK1,HMGCL,CASK,APRT,SUCLA2,ACOT9,ITPA,AK3,NME1-NME2,ATP5A1,PAICS,ATP5J,PPT1,SLC25A…
GO:0042254	Ribosome biogenesis	79	292	0.46	1.55e-12	9606.ENSP00000221801,9606.ENSP00000225698,9606.ENSP00000230340,9606.ENSP00000230640,9606.ENSP00000232888,9606.ENSP00000245539,9606.ENSP00000246868,9606.ENSP00000251453,9606.ENSP00000259469,9606.ENSP00000263239,9606.ENSP00000264279,9606.ENSP00000269349,9606.ENSP00000296577,9606.ENSP00000296930,9606.ENSP00000302886,9606.ENSP00000302896,9606.ENSP00000308179,9606.ENSP00000309830,9606.ENSP00000310448,…	FBL,C1QBP,BYSL,SKIV2L2,RRP9,MRPS7,SBDS,RPS16,RPL35,DDX18,NOP58,EIF4A3,ABCE1,NPM1,PA2G4,RPS9,WDR3,RPL38,SART1,PRKDC,MRPL1,NOC2L,RRS1,RPS7,RPL7,RPS2,RPS21,RPL3,RPS17,RPSA,DDX21,PES1,GTPBP4,RPL12,HEATR1,RPS27,DKC1,PDCD11,RPL5,RPL7A,PIN4,RPL10A,EIF6,RPL11,XRN2,DIS3,RPS6,NOP56,THUMPD1,MYBBP1A,NOP2,XRCC5,RPL24,RPL14,RPS8,DDX17,DDX3X,NHP2L1,WDR43,XPO1,NOLC1,RPS14,RPL23A,RPL6,RPL10,RPS24,EIF2A,RPL35A,TRM…
GO:0006839	Mitochondrial transport	61	225	0.46	1e-09	9606.ENSP00000215375,9606.ENSP00000215570,9606.ENSP00000215882,9606.ENSP00000216034,9606.ENSP00000223136,9606.ENSP00000225174,9606.ENSP00000229416,9606.ENSP00000249269,9606.ENSP00000249442,9606.ENSP00000262030,9606.ENSP00000264335,9606.ENSP00000264954,9606.ENSP00000265641,9606.ENSP00000270538,9606.ENSP00000284320,9606.ENSP00000285093,9606.ENSP00000287295,9606.ENSP00000290299,9606.ENSP00000290573,…	ATP5D,TIMM13,SLC25A1,TOMM22,FIS1,PPIF,GCLC,PMPCB,MTX2,ATP5B,YWHAE,GRPEL1,CPT1A,TIMM44,TOMM70A,ACAA2,AIFM1,ATP5O,HK2,VPS35,ATP5L,ATP5H,HSPA4,LETM1,YWHAG,SFXN1,CYC1,BID,SLC25A20,HSP90AA1,SFN,SAMM50,STOML2,ATP5C1,MPC2,ATP5F1,CPT2,SLC25A5,PMPCA,TOMM34,YWHAB,MCU,PITRM1,SLC25A6,HSPD1,CNP,TIMM9,YWHAZ,ATP5A1,TST,SLC25A12,ATP5J,SLC25A13,PNPT1,TOMM40,NDUFA13,TMEM14C,TIMM50,SLC25A10,SLC25A24,NMT1
GO:0006364	rRNA processing	58	212	0.46	2.2e-09	9606.ENSP00000221801,9606.ENSP00000230340,9606.ENSP00000230640,9606.ENSP00000232888,9606.ENSP00000246868,9606.ENSP00000251453,9606.ENSP00000259469,9606.ENSP00000263239,9606.ENSP00000264279,9606.ENSP00000269349,9606.ENSP00000302886,9606.ENSP00000302896,9606.ENSP00000308179,9606.ENSP00000310448,9606.ENSP00000313420,9606.ENSP00000315017,9606.ENSP00000322396,9606.ENSP00000339095,9606.ENSP00000339795,…	FBL,BYSL,SKIV2L2,RRP9,SBDS,RPS16,RPL35,DDX18,NOP58,EIF4A3,PA2G4,RPS9,WDR3,SART1,PRKDC,MRPL1,RRS1,RPS7,RPL7,RPS2,RPS21,RPS17,DDX21,PES1,GTPBP4,HEATR1,RPS27,DKC1,PDCD11,RPL5,RPL7A,PIN4,RPL10A,EIF6,RPL11,XRN2,DIS3,RPS6,NOP56,THUMPD1,NOP2,RPL14,RPS8,DDX17,NHP2L1,WDR43,NOLC1,RPS14,RPS24,RPL35A,TRMT112,RRP12,RSL1D1,RPL26,RPL27,RPS19,RPS28,DDX27
GO:0050821	Protein stabilization	51	186	0.46	2.6e-08	9606.ENSP00000229239,9606.ENSP00000236850,9606.ENSP00000246117,9606.ENSP00000258091,9606.ENSP00000258654,9606.ENSP00000262375,9606.ENSP00000268058,9606.ENSP00000275603,9606.ENSP00000280326,9606.ENSP00000286371,9606.ENSP00000286788,9606.ENSP00000295688,9606.ENSP00000296543,9606.ENSP00000299300,9606.ENSP00000309555,9606.ENSP00000316357,9606.ENSP00000317334,9606.ENSP00000318176,9606.ENSP00000320866,…	GAPDH,APOA1,NCLN,CCT7,COG3,DNAJA3,PML,CCT6A,CCT5,ATP1B3,CCT8,CCT3,NAA15,CCT2,HCFC1,USP9X,TCP1,PRKRA,CALR,CRTAP,HIST1H1B,LAMP1,HSP90AA1,RPS7,USP7,GTPBP4,ATP1B1,APOA2,BAG3,FLNA,RPL5,BAG2,HSP90AB1,STK4,STX12,RPL11,BAG6,FLOT1,SUGT1,HSPD1,PDCD10,CCT4,ZNF207,CTNND1,HYPK,LAMP2,PARK7,RPL23,CRYAB,PHB2,PHB
GO:0045069	Regulation of viral genome replication	27	99	0.46	0.00016	9606.ENSP00000242351,9606.ENSP00000253024,9606.ENSP00000261875,9606.ENSP00000286713,9606.ENSP00000301764,9606.ENSP00000303754,9606.ENSP00000306614,9606.ENSP00000309142,9606.ENSP00000310275,9606.ENSP00000313007,9606.ENSP00000336721,9606.ENSP00000345656,9606.ENSP00000357113,9606.ENSP00000357459,9606.ENSP00000359506,9606.ENSP00000360922,9606.ENSP00000362931,9606.ENSP00000382707,9606.ENSP00000382840,…	ZC3HAV1,TRIM28,PTPLAD1,STOM,DDB1,PPID,PPIH,PDE12,BANF1,PABPC1,LARP1,VAPA,IFI16,ADAR,FMR1,STAU1,SRPK1,IFITM3,DDX3X,IFITM1,TOP2B,ILF3,TOP2A,VAPB,PPIA,HSPA8,PHB
GO:0006890	Retrograde vesicle-mediated transport, golgi to endoplasmic reticulum	23	84	0.46	0.00063	9606.ENSP00000249923,9606.ENSP00000256682,9606.ENSP00000258654,9606.ENSP00000263354,9606.ENSP00000264028,9606.ENSP00000303145,9606.ENSP00000306010,9606.ENSP00000311449,9606.ENSP00000321266,9606.ENSP00000325002,9606.ENSP00000329419,9606.ENSP00000330945,9606.ENSP00000357048,9606.ENSP00000361057,9606.ENSP00000381293,9606.ENSP00000387286,9606.ENSP00000390783,9606.ENSP00000402346,9606.ENSP00000404833,…	COPB1,ARF3,COG3,NAPA,ARCN1,TMED10,ARF4,RAB6A,PITPNB,COPG1,COPB2,TMED9,COPA,SURF4,NSF,RAB1A,SCFD1,COPG2,TAPBP,TMED7,KLC1,ARFGAP2,COPZ1
GO:0036498	IRE1-mediated unfolded protein response	15	55	0.46	0.0108	9606.ENSP00000264758,9606.ENSP00000290949,9606.ENSP00000299427,9606.ENSP00000316029,9606.ENSP00000349860,9606.ENSP00000354791,9606.ENSP00000357189,9606.ENSP00000357283,9606.ENSP00000360683,9606.ENSP00000378721,9606.ENSP00000417175,9606.ENSP00000418401,9606.ENSP00000466379,9606.ENSP00000473631,9606.ENSP00000480150	ADD1,ATP6V0D1,TPP1,TLN1,GFPT1,DCTN1,HDGF,LMNA,PTPN1,SEC31A,VAPB,SRPRB,ASNA1,DNAJC3,HYOU1
GO:0019320	Hexose catabolic process	14	51	0.46	0.0145	9606.ENSP00000226253,9606.ENSP00000229239,9606.ENSP00000229270,9606.ENSP00000234590,9606.ENSP00000269848,9606.ENSP00000290573,9606.ENSP00000306920,9606.ENSP00000312250,9606.ENSP00000320171,9606.ENSP00000362413,9606.ENSP00000371393,9606.ENSP00000378360,9606.ENSP00000405573,9606.ENSP00000483375	ALDOC,GAPDH,TPI1,ENO1,PFKL,HK2,GLB1,ADPGK,PKM,PGK1,PGM2,DAK,GPI,GALE
GO:0006301	Postreplication repair	14	52	0.46	0.0168	9606.ENSP00000233146,9606.ENSP00000254719,9606.ENSP00000263202,9606.ENSP00000272317,9606.ENSP00000287156,9606.ENSP00000316176,9606.ENSP00000323889,9606.ENSP00000331487,9606.ENSP00000351777,9606.ENSP00000363017,9606.ENSP00000368458,9606.ENSP00000388107,9606.ENSP00000457411,9606.ENSP00000475924	MSH2,RPA1,UFD1L,RPS27A,UBE2L6,UBE2N,TRIM25,NPLOC4,VCP,RPA2,PCNA,UBA52,USP10,POLDIP2
GO:0006396	RNA processing	225	854	0.45	2.59e-35	9606.ENSP00000168216,9606.ENSP00000215793,9606.ENSP00000215829,9606.ENSP00000216038,9606.ENSP00000216252,9606.ENSP00000216832,9606.ENSP00000217109,9606.ENSP00000220592,9606.ENSP00000221419,9606.ENSP00000221801,9606.ENSP00000225698,9606.ENSP00000227524,9606.ENSP00000228284,9606.ENSP00000229390,9606.ENSP00000230340,9606.ENSP00000230640,9606.ENSP00000232888,9606.ENSP00000234677,9606.ENSP00000235090,…	HSD17B10,SF3A1,SNRPD3,RTCB,PHF5A,PNN,CSTF1,AGO2,HNRNPL,FBL,C1QBP,PRPF19,SART3,SRSF9,BYSL,SKIV2L2,RRP9,SARS,WDR77,CPSF3,TARDBP,SNRPA,SRSF6,THOC2,SNRPB2,RALY,SBDS,LSM8,RPS16,LSM7,RBM39,FUS,SNRPA1,LGALS3,MRPL44,TBRG4,SRSF1,RPL35,RTCA,SNW1,C14orf166,AARS,RBM25,ACIN1,DDX18,DCPS,SNRNP40,DNAJC8,NOP58,NSUN2,HNRNPH3,CCAR1,PRPF6,CPSF6,EIF4A3,NONO,MBNL1,HNRNPU,APP,U2AFBP,RAVER1,TRA2A,NUDT21,SNRPD1,SRRM2,PA2…
GO:0006887	Exocytosis	210	789	0.45	2.17e-33	9606.ENSP00000005257,9606.ENSP00000054666,9606.ENSP00000161559,9606.ENSP00000199764,9606.ENSP00000215754,9606.ENSP00000215832,9606.ENSP00000216181,9606.ENSP00000216336,9606.ENSP00000217971,9606.ENSP00000219022,9606.ENSP00000219313,9606.ENSP00000220166,9606.ENSP00000222968,9606.ENSP00000223321,9606.ENSP00000225777,9606.ENSP00000226253,9606.ENSP00000226574,9606.ENSP00000227266,9606.ENSP00000228506,…	RALA,VAMP3,CEACAM1,CEACAM6,MIF,MAPK1,MYH9,CTSG,PGRMC1,OLFM4,PSMD7,CTSH,PDAP1,PSMA2,SYNGR2,ALDOC,NFKB1,CTSC,MLEC,LTA4H,MAPK14,HRG,CTSD,APOA1,CD97,C3,PYCARD,TUBA4A,COPB1,TSG101,ACLY,LGALS3,CAB39,PSMB7,GGH,DNAJC13,ITGAV,HEXB,PSMD11,FAF2,PSMB1,ARFGEF1,COTL1,ERP44,LGALS3BP,NAPA,AGA,PSMD3,RAB10,KNG1,RAB7A,SRP14,IQGAP1,PFKL,SOD1,PSMA5,DYNC1LI1,LIN7C,LAMTOR1,FERMT3,OLA1,APP,STOM,CCT8,KPNB1,CALM3,PDXK,CST…
GO:0072521	Purine-containing compound metabolic process	95	360	0.45	1.77e-14	9606.ENSP00000205402,9606.ENSP00000215375,9606.ENSP00000215882,9606.ENSP00000216044,9606.ENSP00000216605,9606.ENSP00000217426,9606.ENSP00000219302,9606.ENSP00000226253,9606.ENSP00000229239,9606.ENSP00000229270,9606.ENSP00000234590,9606.ENSP00000236959,9606.ENSP00000245552,9606.ENSP00000253382,9606.ENSP00000253792,9606.ENSP00000262030,9606.ENSP00000262878,9606.ENSP00000265174,9606.ENSP00000265838,…	DLD,ATP5D,SLC25A1,GTPBP1,MTHFD1,AHCY,NME3,ALDOC,GAPDH,TPI1,ENO1,ATIC,NT5C,ACSS2,ACLY,ATP5B,SAMHD1,PAPSS1,ACAT1,PRPSAP2,PFKL,HSD17B12,DLAT,ADK,ACSM3,ATP5O,HK2,HPRT1,ATP5L,ATP5H,CBR4,HINT1,PDHB,SULT1B1,ADPGK,PFAS,ACSS1,CYC1,SHMT1,PKM,IMPDH2,NME1,NUDT4,NT5C2,MCCC2,AK2,ACSL5,STOML2,ATP5C1,ACSL3,SULT1A4,PNP,ADSS,MPC2,HMGCS2,ATP5F1,GNAI3,CMPK1,PRPS1,PPCS,AK1,PGK1,HMGCL,CASK,APRT,SUCLA2,ACOT9,ITPA,AK3,N…
GO:0001666	Response to hypoxia	90	342	0.45	1.17e-13	9606.ENSP00000044462,9606.ENSP00000157812,9606.ENSP00000179259,9606.ENSP00000210313,9606.ENSP00000215071,9606.ENSP00000216455,9606.ENSP00000216802,9606.ENSP00000217426,9606.ENSP00000217958,9606.ENSP00000219070,9606.ENSP00000219313,9606.ENSP00000223136,9606.ENSP00000223321,9606.ENSP00000226279,9606.ENSP00000234701,9606.ENSP00000244043,9606.ENSP00000259457,9606.ENSP00000261303,9606.ENSP00000261479,…	PSMA4,PSMC4,C12orf5,PSMD5,PSMD8,PSMA3,PSME2,AHCY,PSMD10,MMP2,PSMD7,FIS1,PSMA2,CD38,CLCA1,PTGIS,PSMB7,PSMC1,PSMA6,PSMD11,PSMB1,TCEB2,PSMD3,PML,PSMA5,RPS27A,ACAA2,PSMB4,HK2,PSME3,FABP1,ITGA2,HSP90B1,TBL2,PSMD1,PSMD2,PSMC5,HP1BP3,HSD11B2,PKM,NPEPPS,PSMF1,CAV1,PRKAA1,PSMD12,PSMB10,LONP1,MT-ND4,PSMB5,ATP1B1,LMNA,PSMD4,PSMA7,PDLIM1,PSMB2,PGK1,SRC,PSMB9,PSMB8,UBQLN1,SOD3,PSME1,HSPD1,CLDN3,ERO1L,TM9SF4,C…
GO:0016072	rRNA metabolic process	59	223	0.45	4.41e-09	9606.ENSP00000221801,9606.ENSP00000230340,9606.ENSP00000230640,9606.ENSP00000232888,9606.ENSP00000242784,9606.ENSP00000246868,9606.ENSP00000251453,9606.ENSP00000259469,9606.ENSP00000263239,9606.ENSP00000264279,9606.ENSP00000269349,9606.ENSP00000302886,9606.ENSP00000302896,9606.ENSP00000308179,9606.ENSP00000310448,9606.ENSP00000313420,9606.ENSP00000315017,9606.ENSP00000322396,9606.ENSP00000339095,…	FBL,BYSL,SKIV2L2,RRP9,C19orf43,SBDS,RPS16,RPL35,DDX18,NOP58,EIF4A3,PA2G4,RPS9,WDR3,SART1,PRKDC,MRPL1,RRS1,RPS7,RPL7,RPS2,RPS21,RPS17,DDX21,PES1,GTPBP4,HEATR1,RPS27,DKC1,PDCD11,RPL5,RPL7A,PIN4,RPL10A,EIF6,RPL11,XRN2,DIS3,RPS6,NOP56,THUMPD1,NOP2,RPL14,RPS8,DDX17,NHP2L1,WDR43,NOLC1,RPS14,RPS24,RPL35A,TRMT112,RRP12,RSL1D1,RPL26,RPL27,RPS19,RPS28,DDX27
GO:0017038	Protein import	38	144	0.45	6.48e-06	9606.ENSP00000216034,9606.ENSP00000219169,9606.ENSP00000245544,9606.ENSP00000252486,9606.ENSP00000261396,9606.ENSP00000261574,9606.ENSP00000261667,9606.ENSP00000262982,9606.ENSP00000264954,9606.ENSP00000265388,9606.ENSP00000268058,9606.ENSP00000270538,9606.ENSP00000283195,9606.ENSP00000287295,9606.ENSP00000288266,9606.ENSP00000290158,9606.ENSP00000302961,9606.ENSP00000310668,9606.ENSP00000334373,…	TOMM22,NUTF2,NUP85,APOE,NUP133,IPO5,KPNA3,CSE1L,GRPEL1,TNPO3,PML,TIMM44,RANBP2,AIFM1,APPL1,KPNB1,HSPA4,NUP93,KPNA4,HSP90AA1,TNPO1,SAMM50,IPO4,IPO9,TPR,LMNA,ADAR,KPNA6,IPO7,HSPD1,ELAVL1,LAMP2,TOMM40,RPL23,PHB2,TIMM50,RAN,NUP62
GO:0031123	RNA 3-end processing	36	135	0.45	1.06e-05	9606.ENSP00000168216,9606.ENSP00000217109,9606.ENSP00000221801,9606.ENSP00000229390,9606.ENSP00000238112,9606.ENSP00000244020,9606.ENSP00000245838,9606.ENSP00000258962,9606.ENSP00000266679,9606.ENSP00000269349,9606.ENSP00000284981,9606.ENSP00000291552,9606.ENSP00000300291,9606.ENSP00000307863,9606.ENSP00000312356,9606.ENSP00000313007,9606.ENSP00000325905,9606.ENSP00000326261,9606.ENSP00000337632,…	HSD17B10,CSTF1,FBL,SRSF9,CPSF3,SRSF6,THOC2,SRSF1,CPSF6,EIF4A3,APP,U2AFBP,NUDT21,U2AF2,TRMT10C,PABPC1,SRSF7,SRRM1,SARNP,CPSF7,RPS21,DKC1,AHCYL1,SRSF11,MAGOH,CSTF2,SRSF3,NCBP1,SRSF2,DDX39B,SSB,PNPT1,ALYREF,RNPS1,RBM8A,CPSF1
GO:0017148	Negative regulation of translation	36	136	0.45	1.22e-05	9606.ENSP00000220592,9606.ENSP00000220849,9606.ENSP00000229239,9606.ENSP00000240185,9606.ENSP00000254878,9606.ENSP00000256383,9606.ENSP00000268058,9606.ENSP00000269349,9606.ENSP00000278572,9606.ENSP00000305230,9606.ENSP00000313199,9606.ENSP00000317985,9606.ENSP00000318195,9606.ENSP00000318868,9606.ENSP00000320866,9606.ENSP00000320949,9606.ENSP00000336721,9606.ENSP00000340329,9606.ENSP00000348722,…	AGO2,EIF3E,GAPDH,TARDBP,HRSP12,EIF2S1,PML,EIF4A3,RPS3,SRP9,HNRNPD,ROCK2,NCL,SHMT1,CALR,CNOT1,LARP1,CAPRIN1,PUS7,FXR1,EPRS,TPR,SYNCRIP,FMR1,YBX1,EIF6,HNRNPR,IGF2BP2,KHSRP,ROCK1,DDX3X,RBM4,ILF3,GNB2L1,UPF1,YTHDF3
GO:0007006	Mitochondrial membrane organization	36	137	0.45	1.39e-05	9606.ENSP00000215375,9606.ENSP00000215570,9606.ENSP00000216034,9606.ENSP00000225174,9606.ENSP00000229416,9606.ENSP00000249442,9606.ENSP00000262030,9606.ENSP00000262570,9606.ENSP00000264335,9606.ENSP00000285093,9606.ENSP00000290299,9606.ENSP00000290573,9606.ENSP00000291295,9606.ENSP00000297185,9606.ENSP00000300688,9606.ENSP00000301587,9606.ENSP00000302961,9606.ENSP00000305653,9606.ENSP00000306330,…	ATP5D,TIMM13,TOMM22,PPIF,GCLC,MTX2,ATP5B,CHCHD3,YWHAE,ACAA2,ATP5O,HK2,CALM3,HSPA9,ATP5L,ATP5H,HSPA4,LETM1,YWHAG,BID,HSP90AA1,SFN,SAMM50,ATP5C1,MTX1,ATP5F1,SLC25A5,YWHAB,CNP,TIMM9,YWHAZ,ATP5A1,ATP5J,NDUFA13,TIMM50,NMT1
GO:1901657	Glycosyl compound metabolic process	34	129	0.45	2.56e-05	9606.ENSP00000216044,9606.ENSP00000217426,9606.ENSP00000219302,9606.ENSP00000232607,9606.ENSP00000236959,9606.ENSP00000245552,9606.ENSP00000264705,9606.ENSP00000268835,9606.ENSP00000286621,9606.ENSP00000298556,9606.ENSP00000303525,9606.ENSP00000321584,9606.ENSP00000337060,9606.ENSP00000339479,9606.ENSP00000352584,9606.ENSP00000354532,9606.ENSP00000358867,9606.ENSP00000361140,9606.ENSP00000361512,…	GTPBP1,AHCY,NME3,UMPS,ATIC,NT5C,CAD,PRPSAP2,ADK,HPRT1,CBR4,IMPDH2,NME1,NT5C2,AKR1B10,PNP,GNAI3,AKR1A1,PRPS1,FUCA1,CASK,APRT,AKR1C3,AK3,NME1-NME2,PRPS2,HDHD1,RHOA,DERA,RAB23,GMPS,TJP2,RAN,ERH
GO:0006606	Protein import into nucleus	26	97	0.45	0.0003	9606.ENSP00000219169,9606.ENSP00000245544,9606.ENSP00000261396,9606.ENSP00000261574,9606.ENSP00000261667,9606.ENSP00000262982,9606.ENSP00000265388,9606.ENSP00000268058,9606.ENSP00000283195,9606.ENSP00000288266,9606.ENSP00000290158,9606.ENSP00000310668,9606.ENSP00000334373,9606.ENSP00000336712,9606.ENSP00000346453,9606.ENSP00000354742,9606.ENSP00000356448,9606.ENSP00000357283,9606.ENSP00000357459,…	NUTF2,NUP85,NUP133,IPO5,KPNA3,CSE1L,TNPO3,PML,RANBP2,APPL1,KPNB1,NUP93,KPNA4,TNPO1,IPO4,IPO9,TPR,LMNA,ADAR,KPNA6,IPO7,ELAVL1,RPL23,PHB2,RAN,NUP62
GO:0006637	acyl-CoA metabolic process	25	95	0.45	0.00052	9606.ENSP00000205402,9606.ENSP00000215882,9606.ENSP00000253382,9606.ENSP00000253792,9606.ENSP00000265838,9606.ENSP00000278353,9606.ENSP00000280346,9606.ENSP00000289416,9606.ENSP00000303525,9606.ENSP00000307241,9606.ENSP00000316924,9606.ENSP00000348429,9606.ENSP00000350012,9606.ENSP00000356820,9606.ENSP00000358414,9606.ENSP00000361642,9606.ENSP00000363614,9606.ENSP00000367923,9606.ENSP00000368605,…	DLD,SLC25A1,ACSS2,ACLY,ACAT1,HSD17B12,DLAT,ACSM3,CBR4,PDHB,ACSS1,ACSL5,ACSL3,MPC2,HMGCS2,PPCS,HMGCL,SUCLA2,ACOT9,PPT1,ACSF2,SUCLG2,HSD17B4,DBI,DGAT1
GO:1903749	Positive regulation of establishment of protein localization to mitochondrion	16	60	0.45	0.0092	9606.ENSP00000249071,9606.ENSP00000264335,9606.ENSP00000270225,9606.ENSP00000306330,9606.ENSP00000318822,9606.ENSP00000320324,9606.ENSP00000340648,9606.ENSP00000340989,9606.ENSP00000346148,9606.ENSP00000349722,9606.ENSP00000361930,9606.ENSP00000379287,9606.ENSP00000400906,9606.ENSP00000466214,9606.ENSP00000468424,9606.ENSP00000479919	RAC2,YWHAE,SAE1,YWHAG,BID,NPEPPS,HUWE1,SFN,PRKAA1,UBE2D3,YWHAB,YWHAZ,UBE2L3,PDCD5,NMT1,SH3GLB1
GO:0030449	Regulation of complement activation	15	56	0.45	0.0123	9606.ENSP00000223642,9606.ENSP00000224181,9606.ENSP00000225698,9606.ENSP00000245907,9606.ENSP00000256785,9606.ENSP00000322061,9606.ENSP00000354458,9606.ENSP00000356399,9606.ENSP00000357156,9606.ENSP00000363770,9606.ENSP00000377783,9606.ENSP00000378130,9606.ENSP00000385035,9606.ENSP00000415941,9606.ENSP00000479488	C5,C8G,C1QBP,C3,CFHR5,C7,C8A,CFH,CD5L,C1QC,PROS1,CFI,C1S,C4B,PHB
GO:0045104	Intermediate filament cytoskeleton organization	13	49	0.45	0.0259	9606.ENSP00000070846,9606.ENSP00000246662,9606.ENSP00000257860,9606.ENSP00000270142,9606.ENSP00000310861,9606.ENSP00000323856,9606.ENSP00000336775,9606.ENSP00000358865,9606.ENSP00000363071,9606.ENSP00000369129,9606.ENSP00000421689,9606.ENSP00000446007,9606.ENSP00000484472	PKP2,KRT9,PRPH,SOD1,KRT2,PLEC,SYNM,INA,DES,DSP,CSNK1A1,VIM,EPPK1
GO:0000959	Mitochondrial rna metabolic process	11	41	0.45	0.0467	9606.ENSP00000168216,9606.ENSP00000258770,9606.ENSP00000261772,9606.ENSP00000309142,9606.ENSP00000312356,9606.ENSP00000333837,9606.ENSP00000355086,9606.ENSP00000373918,9606.ENSP00000400646,9606.ENSP00000420588,9606.ENSP00000472847	HSD17B10,TBRG4,AARS,PDE12,TRMT10C,MRPL12,DARS2,GARS,PNPT1,TFAM,SARS2
GO:0072528	Pyrimidine-containing compound biosynthetic process	11	41	0.45	0.0467	9606.ENSP00000219302,9606.ENSP00000232607,9606.ENSP00000264705,9606.ENSP00000318868,9606.ENSP00000337060,9606.ENSP00000349576,9606.ENSP00000360939,9606.ENSP00000361512,9606.ENSP00000370376,9606.ENSP00000376886,9606.ENSP00000396452	NME3,UMPS,CAD,SHMT1,NME1,DCTD,CMPK1,PRPS1,DUT,NME1-NME2,HDHD1
GO:0034622	Cellular protein-containing complex assembly	210	816	0.44	1.16e-31	9606.ENSP00000001008,9606.ENSP00000054666,9606.ENSP00000184266,9606.ENSP00000210313,9606.ENSP00000215375,9606.ENSP00000215793,9606.ENSP00000215829,9606.ENSP00000216190,9606.ENSP00000216554,9606.ENSP00000217958,9606.ENSP00000220592,9606.ENSP00000220849,9606.ENSP00000227524,9606.ENSP00000228284,9606.ENSP00000229390,9606.ENSP00000235090,9606.ENSP00000244020,9606.ENSP00000244537,9606.ENSP00000245539,…	FKBP4,VAMP3,NDUFB4,PSMD5,ATP5D,SF3A1,SNRPD3,EIF3D,EIF5,PSMD10,AGO2,EIF3E,PRPF19,SART3,SRSF9,WDR77,SRSF6,HIST1H4F,MRPS7,EIF3K,VIL1,CORO7,NDUFA10,EIF2S3,EIF3G,GRWD1,RPA1,NASP,SRSF1,KIAA0368,UBE2K,PSMD11,EIF3J,MCM4,NAPA,NDUFS3,HAT1,MCM6,MCM2,PRPF6,CPSF6,PXN,NDUFB10,RPS27A,SMARCA5,NUP205,VBP1,AIFM1,AP2M1,HMGB2,NDUFAF2,NPM1,NDUFB8,CCT2,NUDT21,SNRPD1,DDB1,UBTF,HSPA4,TBCA,MCM7,HIST1H1E,CLTB,RPL38,SART1,…
GO:0055086	Nucleobase-containing small molecule metabolic process	133	508	0.44	3.32e-20	9606.ENSP00000205402,9606.ENSP00000210444,9606.ENSP00000215375,9606.ENSP00000215832,9606.ENSP00000215882,9606.ENSP00000216044,9606.ENSP00000216410,9606.ENSP00000216605,9606.ENSP00000217426,9606.ENSP00000219302,9606.ENSP00000221130,9606.ENSP00000226253,9606.ENSP00000229239,9606.ENSP00000229270,9606.ENSP00000232607,9606.ENSP00000234590,9606.ENSP00000236959,9606.ENSP00000244043,9606.ENSP00000245552,…	DLD,NANS,ATP5D,MAPK1,SLC25A1,GTPBP1,GNPNAT1,MTHFD1,AHCY,NME3,GSR,ALDOC,GAPDH,TPI1,UMPS,ENO1,ATIC,PTGIS,NT5C,ACSS2,ACLY,UGGT1,ATP5B,SAMHD1,CAD,PAPSS1,ACAT1,PRPSAP2,PFKL,HSD17B12,DLAT,ADK,ACSM3,ATP5O,HK2,HPRT1,ATP5L,RRM1,ATP5H,CBR4,HINT1,PDHB,SULT1B1,GMPPB,ADPGK,PFAS,ACSS1,CYC1,SHMT1,UGDH,PKM,IMPDH2,DCTPP1,KARS,IDH2,NME1,NUDT4,UGP2,NT5C2,MCCC2,AK2,ACSL5,STOML2,ATP5C1,DCTD,GFPT1,ACSL3,VCP,SULT1A4,RR…
GO:0036293	Response to decreased oxygen levels	91	354	0.44	2.52e-13	9606.ENSP00000044462,9606.ENSP00000157812,9606.ENSP00000179259,9606.ENSP00000210313,9606.ENSP00000215071,9606.ENSP00000216455,9606.ENSP00000216802,9606.ENSP00000217426,9606.ENSP00000217958,9606.ENSP00000219070,9606.ENSP00000219313,9606.ENSP00000223136,9606.ENSP00000223321,9606.ENSP00000226279,9606.ENSP00000234701,9606.ENSP00000244043,9606.ENSP00000259457,9606.ENSP00000261303,9606.ENSP00000261479,…	PSMA4,PSMC4,C12orf5,PSMD5,PSMD8,PSMA3,PSME2,AHCY,PSMD10,MMP2,PSMD7,FIS1,PSMA2,CD38,CLCA1,PTGIS,PSMB7,PSMC1,PSMA6,PSMD11,PSMB1,TCEB2,PSMD3,PML,PSMA5,RPS27A,ACAA2,AIFM1,PSMB4,HK2,PSME3,FABP1,ITGA2,HSP90B1,TBL2,PSMD1,PSMD2,PSMC5,HP1BP3,HSD11B2,PKM,NPEPPS,PSMF1,CAV1,PRKAA1,PSMD12,PSMB10,LONP1,MT-ND4,PSMB5,ATP1B1,LMNA,PSMD4,PSMA7,PDLIM1,PSMB2,PGK1,SRC,PSMB9,PSMB8,UBQLN1,SOD3,PSME1,HSPD1,CLDN3,ERO1L,TM…
GO:1903829	Positive regulation of cellular protein localization	88	342	0.44	6.47e-13	9606.ENSP00000215832,9606.ENSP00000219169,9606.ENSP00000223136,9606.ENSP00000229795,9606.ENSP00000240185,9606.ENSP00000248444,9606.ENSP00000249071,9606.ENSP00000251968,9606.ENSP00000253024,9606.ENSP00000254301,9606.ENSP00000256644,9606.ENSP00000258091,9606.ENSP00000261574,9606.ENSP00000261769,9606.ENSP00000264335,9606.ENSP00000268058,9606.ENSP00000268182,9606.ENSP00000270225,9606.ENSP00000275603,…	MAPK1,NUTF2,FIS1,MAPK14,TARDBP,VIL1,RAC2,TSG101,TRIM28,LGALS3,LAMTOR5,CCT7,IPO5,CDH1,YWHAE,PML,IQGAP1,SAE1,CCT6A,CCT5,GPD1L,STOM,CCT8,CCT3,DTX3L,ARF6,CCT2,MAP1A,YWHAG,KIF5B,TCP1,STX4,ROCK2,BID,HCLS1,NPEPPS,PPM1A,PLS1,EPB41L2,HUWE1,SFN,EPB41,ANP32B,PRKAA1,DDRGK1,SPTBN1,UBE2D3,ACSL3,ATP2B4,CD2AP,MYO1C,TFRC,MSN,PARP1,EZR,TPR,BAG3,DKC1,FLNA,SORBS1,HSP90AB1,YWHAB,SRC,VPS28,SQSTM1,PDCD10,NUMA1,JUP,CCT4…
GO:1901991	Negative regulation of mitotic cell cycle phase transition	57	219	0.44	1.45e-08	9606.ENSP00000044462,9606.ENSP00000157812,9606.ENSP00000210313,9606.ENSP00000215071,9606.ENSP00000216455,9606.ENSP00000216802,9606.ENSP00000217958,9606.ENSP00000219313,9606.ENSP00000223321,9606.ENSP00000259457,9606.ENSP00000261303,9606.ENSP00000261479,9606.ENSP00000261712,9606.ENSP00000262193,9606.ENSP00000264639,9606.ENSP00000268058,9606.ENSP00000271308,9606.ENSP00000290541,9606.ENSP00000293362,…	PSMA4,PSMC4,PSMD5,PSMD8,PSMA3,PSME2,PSMD10,PSMD7,PSMA2,PSMB7,PSMC1,PSMA6,PSMD11,PSMB1,PSMD3,PML,PSMA5,PSMB4,PSME3,RAD21,PSMD1,PSMD2,PSMC5,PRKDC,CNOT1,CARM1,MRE11A,PSMF1,SFN,PSMD12,PSMB10,PSMB5,TPR,BUB3,PSMD4,PSMA7,PSMB2,RPA2,PSMB9,PSMB8,PCNA,PSME1,FHL1,ZNF207,CDK1,PSMD14,PSMC2,PSMD13,PSMC6,PRMT1,PSMD6,TNKS1BP1,CDK5RAP3,PSMD9,RPL26,PSMC3,PSMB3
GO:1901605	Alpha-amino acid metabolic process	49	191	0.44	3.1e-07	9606.ENSP00000205402,9606.ENSP00000216605,9606.ENSP00000217426,9606.ENSP00000220966,9606.ENSP00000223127,9606.ENSP00000229416,9606.ENSP00000234677,9606.ENSP00000245206,9606.ENSP00000254878,9606.ENSP00000264705,9606.ENSP00000265395,9606.ENSP00000265594,9606.ENSP00000265838,9606.ENSP00000273920,9606.ENSP00000277865,9606.ENSP00000281243,9606.ENSP00000284031,9606.ENSP00000299299,9606.ENSP00000313490,…	DLD,MTHFD1,AHCY,PYCRL,PLOD3,GCLC,SARS,GOT2,HRSP12,CAD,HIBADH,MCCC1,ACAT1,ENOPH1,GLUD1,QDPR,DDAH1,PCBD1,PFAS,GLS,SHMT1,BCAT2,ADI1,SHMT2,PYCR2,MCCC2,GFPT1,HIBCH,ADSS,OAT,PHGDH,ALDH18A1,ASS1,HMGCL,ALDH4A1,AGMAT,PSAT1,DPEP1,NIT2,MPST,PYCR1,FAH,SMS,TST,ALDH7A1,SLC25A12,IVD,GMPS,ALDH6A1
GO:0051099	Positive regulation of binding	45	175	0.44	1.1e-06	9606.ENSP00000216190,9606.ENSP00000220849,9606.ENSP00000221419,9606.ENSP00000224073,9606.ENSP00000252486,9606.ENSP00000253024,9606.ENSP00000256383,9606.ENSP00000256644,9606.ENSP00000264758,9606.ENSP00000265986,9606.ENSP00000272519,9606.ENSP00000284981,9606.ENSP00000291295,9606.ENSP00000296161,9606.ENSP00000296503,9606.ENSP00000296585,9606.ENSP00000311825,9606.ENSP00000332604,9606.ENSP00000337060,…	EIF3D,EIF3E,HNRNPL,EDF1,APOE,TRIM28,EIF2S1,LAMTOR5,ADD1,IDE,RALB,APP,CALM3,DTX3L,HMGB2,ITGA2,CTBP2,EIF3C,NME1,CAV1,CTNNB1,EPB41,HMGB1,ANXA2,DDRGK1,PARP1,DHX9,SPTA1,FMR1,HSP90AB1,STK4,FAM129B,TXN,RPL11,NCBP1,MAPRE1,FLOT1,FKBP1A,STMN1,EIF4G1,PARK7,CDK5,RAN,B2M,SPON1
GO:1902904	Negative regulation of supramolecular fiber organization	37	143	0.44	1.35e-05	9606.ENSP00000001008,9606.ENSP00000248444,9606.ENSP00000252486,9606.ENSP00000253925,9606.ENSP00000259365,9606.ENSP00000262215,9606.ENSP00000263168,9606.ENSP00000263867,9606.ENSP00000264071,9606.ENSP00000264758,9606.ENSP00000296755,9606.ENSP00000303908,9606.ENSP00000308753,9606.ENSP00000314067,9606.ENSP00000347719,9606.ENSP00000348381,9606.ENSP00000349259,9606.ENSP00000350757,9606.ENSP00000356257,…	FKBP4,VIL1,APOE,PPFIA1,TMOD1,ARFGEF1,CAPZA1,CAPG,TUBB4A,ADD1,MAP1B,TWF2,TMOD3,PAK2,TBCD,ADD3,SPTBN1,GMFB,LMOD1,F11R,SPTA1,SPTAN1,GSN,HSPG2,MAPRE1,EMILIN1,CORO1B,LIMA1,CTNNA2,CAPZB,STMN1,FAM49B,HSPA8,CRYAB,TWF1,SPTB,WASF2
GO:0043624	Cellular protein complex disassembly	36	140	0.44	2.1e-05	9606.ENSP00000081029,9606.ENSP00000238497,9606.ENSP00000245539,9606.ENSP00000248444,9606.ENSP00000253099,9606.ENSP00000254630,9606.ENSP00000256441,9606.ENSP00000258383,9606.ENSP00000258455,9606.ENSP00000263354,9606.ENSP00000269886,9606.ENSP00000279242,9606.ENSP00000296456,9606.ENSP00000296577,9606.ENSP00000303908,9606.ENSP00000305682,9606.ENSP00000314499,9606.ENSP00000315017,9606.ENSP00000333837,…	MRPS35,VPS4B,MRPS7,VIL1,MRPL4,PTCD3,MRPS36,MRPL44,MRPS9,NAPA,SH3GL1,MRPL49,APEH,ABCE1,TWF2,MRPL39,GAK,MRPL1,MRPL12,ETF1,MRPL37,MRPL24,DAP3,MRPL19,NSF,MRPS6,GSPT1,STMN1,MRPS22,MRPS27,HSPA8,CFL1,CKAP5,TRMT112,TWF1,MRPL45
GO:1990748	Cellular detoxification	26	101	0.44	0.00051	9606.ENSP00000221130,9606.ENSP00000252486,9606.ENSP00000262746,9606.ENSP00000265462,9606.ENSP00000270142,9606.ENSP00000295834,9606.ENSP00000298510,9606.ENSP00000319788,9606.ENSP00000342026,9606.ENSP00000352584,9606.ENSP00000354612,9606.ENSP00000356864,9606.ENSP00000358727,9606.ENSP00000361140,9606.ENSP00000363641,9606.ENSP00000367992,9606.ENSP00000369586,9606.ENSP00000370750,9606.ENSP00000371554,…	GSR,APOE,PRDX1,PRDX5,SOD1,FABP1,PRDX3,NQO1,PRDX6,AKR1B10,PTGS1,MGST3,GSTO1,AKR1A1,TXN,ESD,HBE1,RDH11,SOD3,GPX2,MGST1,GSTP1,PARK7,GSTK1,TXNRD1,FAM213A
GO:0051702	Interaction with symbiont	24	93	0.44	0.00092	9606.ENSP00000216336,9606.ENSP00000229239,9606.ENSP00000232003,9606.ENSP00000240185,9606.ENSP00000252486,9606.ENSP00000255030,9606.ENSP00000256785,9606.ENSP00000261531,9606.ENSP00000286713,9606.ENSP00000301764,9606.ENSP00000308938,9606.ENSP00000345656,9606.ENSP00000346032,9606.ENSP00000346839,9606.ENSP00000359506,9606.ENSP00000362649,9606.ENSP00000367208,9606.ENSP00000373620,9606.ENSP00000417175,…	CTSG,GAPDH,HRG,TARDBP,APOE,CRP,CFHR5,SNW1,STOM,DDB1,PLG,VAPA,ANXA2,FN1,FMR1,HDAC1,SUGT1,HSPD1,VAPB,HSPA8,CFL1,ELANE,PHB,PSMC3
GO:1904377	Positive regulation of protein localization to cell periphery	18	69	0.44	0.0057	9606.ENSP00000248444,9606.ENSP00000254301,9606.ENSP00000298316,9606.ENSP00000307078,9606.ENSP00000317714,9606.ENSP00000336831,9606.ENSP00000338481,9606.ENSP00000345259,9606.ENSP00000349259,9606.ENSP00000350012,9606.ENSP00000350310,9606.ENSP00000356042,9606.ENSP00000360293,9606.ENSP00000374455,9606.ENSP00000377298,9606.ENSP00000379350,9606.ENSP00000391490,9606.ENSP00000426909	VIL1,LGALS3,ARF6,KIF5B,STX4,PLS1,EPB41L2,EPB41,SPTBN1,ACSL3,ATP2B4,EZR,SORBS1,SQSTM1,NUMA1,ITGB1,AGR2,GNB2L1
GO:0009066	Aspartate family amino acid metabolic process	13	50	0.44	0.0296	9606.ENSP00000205402,9606.ENSP00000216605,9606.ENSP00000223127,9606.ENSP00000245206,9606.ENSP00000254878,9606.ENSP00000273920,9606.ENSP00000333666,9606.ENSP00000355493,9606.ENSP00000358417,9606.ENSP00000361471,9606.ENSP00000377696,9606.ENSP00000385746,9606.ENSP00000387123	DLD,MTHFD1,PLOD3,GOT2,HRSP12,ENOPH1,ADI1,ADSS,PHGDH,ASS1,NIT2,SMS,ALDH7A1
GO:0016126	Sterol biosynthetic process	13	50	0.44	0.0296	9606.ENSP00000003100,9606.ENSP00000236850,9606.ENSP00000253792,9606.ENSP00000285093,9606.ENSP00000339883,9606.ENSP00000346148,9606.ENSP00000349078,9606.ENSP00000356015,9606.ENSP00000356218,9606.ENSP00000358414,9606.ENSP00000359297,9606.ENSP00000370748,9606.ENSP00000410769	CYP51A1,APOA1,ACLY,ACAA2,LBR,PRKAA1,FDPS,ACAT2,CYB5R1,HMGCS2,NSDHL,IDI1,CNBP
GO:0044265	Cellular macromolecule catabolic process	231	917	0.43	7.77e-34	9606.ENSP00000044462,9606.ENSP00000157812,9606.ENSP00000210313,9606.ENSP00000215071,9606.ENSP00000216455,9606.ENSP00000216802,9606.ENSP00000217958,9606.ENSP00000219313,9606.ENSP00000220166,9606.ENSP00000220849,9606.ENSP00000221566,9606.ENSP00000222247,9606.ENSP00000223321,9606.ENSP00000223641,9606.ENSP00000225430,9606.ENSP00000225726,9606.ENSP00000227266,9606.ENSP00000227524,9606.ENSP00000229268,…	PSMA4,PSMC4,PSMD5,PSMD8,PSMA3,PSME2,PSMD10,PSMD7,CTSH,EIF3E,SGTA,RPL18A,PSMA2,SEC61B,RPL19,CCDC47,CTSC,PRPF19,USP5,RPS12,SKIV2L2,VPS4B,C19orf43,RNF114,CLPP,RPS16,TSG101,LSM7,VPS25,HRSP12,UGGT1,KIAA0368,PSMB7,RPL35,PSMC1,UBE2K,PSMA6,USP14,PSMD11,FAF2,PSMB1,RPL8,UFD1L,DCPS,PSMD3,RAB7A,PCNP,IDE,WDR61,PML,COPS3,EIF4A3,RPS11,PSMA5,RPS27A,ERLIN2,RPS3,UCHL1,UBE2L6,KPNB1,PSMB4,AP2M1,PSME3,STT3B,DTX3L,HMG…
GO:0070482	Response to oxygen levels	97	379	0.43	4.32e-14	9606.ENSP00000044462,9606.ENSP00000157812,9606.ENSP00000179259,9606.ENSP00000210313,9606.ENSP00000215071,9606.ENSP00000216455,9606.ENSP00000216802,9606.ENSP00000217426,9606.ENSP00000217958,9606.ENSP00000219070,9606.ENSP00000219313,9606.ENSP00000223136,9606.ENSP00000223321,9606.ENSP00000226279,9606.ENSP00000234701,9606.ENSP00000244043,9606.ENSP00000259457,9606.ENSP00000261303,9606.ENSP00000261479,…	PSMA4,PSMC4,C12orf5,PSMD5,PSMD8,PSMA3,PSME2,AHCY,PSMD10,MMP2,PSMD7,FIS1,PSMA2,CD38,CLCA1,PTGIS,PSMB7,PSMC1,PSMA6,PSMD11,PSMB1,TCEB2,PSMD3,PML,PSMA5,RPS27A,ATP6V1A,ACAA2,AIFM1,PSMB4,HK2,ATP6V0D1,PSME3,FABP1,ITGA2,HSP90B1,TBL2,PSMD1,PSMD2,PSMC5,HP1BP3,HSD11B2,PKM,NPEPPS,PSMF1,CAV1,PRKAA1,ATG7,PSMD12,PSMB10,LONP1,MT-ND4,PSMB5,ATP1B1,LMNA,PSMD4,PSMA7,PDLIM1,NOX1,PSMB2,PGK1,SRC,ATP6V1G1,PSMB9,PSMB8,UB…
GO:0002429	Immune response-activating cell surface receptor signaling pathway	78	311	0.43	5.53e-11	9606.ENSP00000044462,9606.ENSP00000157812,9606.ENSP00000210313,9606.ENSP00000215071,9606.ENSP00000215832,9606.ENSP00000216455,9606.ENSP00000216802,9606.ENSP00000217958,9606.ENSP00000219313,9606.ENSP00000220003,9606.ENSP00000223321,9606.ENSP00000226279,9606.ENSP00000226574,9606.ENSP00000228825,9606.ENSP00000256078,9606.ENSP00000259457,9606.ENSP00000261303,9606.ENSP00000261479,9606.ENSP00000261712,…	PSMA4,PSMC4,PSMD5,PSMD8,MAPK1,PSMA3,PSME2,PSMD10,PSMD7,CSK,PSMA2,CD38,NFKB1,ARPC3,KRAS,PSMB7,PSMC1,PSMA6,PSMD11,PSMB1,ARPC1A,MAPK3,ACTR3,PSMD3,PSMA5,PSMB4,PSME3,ARPC5,CRK,PSMD1,PSMD2,PSMC5,KHDRBS1,PAK2,UBE2N,RFTN1,HSP90AA1,PSMF1,PTK2,CRKL,PSMD12,RAC1,STOML2,PSMB10,MYO1C,HLA-DRB1,PSMB5,PSMD4,PSMA7,HSP90AB1,PSMB2,SRC,PSMB9,PSMB8,BAG6,ABI1,ACTR2,PSME1,GRB2,HLA-DRA,HLA-A,CDC42,PSMD14,ARPC4,PSMC2,PTPN…
GO:0007015	Actin filament organization	64	254	0.43	4.15e-09	9606.ENSP00000228825,9606.ENSP00000245932,9606.ENSP00000248444,9606.ENSP00000249071,9606.ENSP00000251166,9606.ENSP00000259365,9606.ENSP00000262753,9606.ENSP00000262942,9606.ENSP00000263238,9606.ENSP00000263867,9606.ENSP00000264758,9606.ENSP00000284770,9606.ENSP00000292385,9606.ENSP00000294742,9606.ENSP00000299767,9606.ENSP00000303908,9606.ENSP00000308753,9606.ENSP00000320176,9606.ENSP00000324422,…	ARPC3,VASP,VIL1,RAC2,CORO7,TMOD1,POF1B,ARPC1A,ACTR3,CAPG,ADD1,PDLIM3,DBN1,ARPC5,HSP90B1,TWF2,TMOD3,HCLS1,ZYX,MYO1D,FLII,PAWR,PLS1,DPYSL3,MYO1F,SORBS2,SVIL,PLS3,ADD3,RAC1,SH3BP1,TPM1,CD2AP,MYO1C,ACTA1,ENAH,EZR,LMOD1,SPTA1,TPM3,FLNA,MYO6,SORBS1,PDLIM1,CAP1,MCU,SRC,GSN,ABI1,CTTN,ACTR2,TPM2,MYO1B,CORO1B,ACTN1,LIMA1,DIAPH1,CDC42,TF,ARPC4,CORO1C,RHOA,CFL1,TWF1
GO:1901988	Negative regulation of cell cycle phase transition	59	235	0.43	2.27e-08	9606.ENSP00000044462,9606.ENSP00000157812,9606.ENSP00000210313,9606.ENSP00000215071,9606.ENSP00000216455,9606.ENSP00000216802,9606.ENSP00000217958,9606.ENSP00000219313,9606.ENSP00000223321,9606.ENSP00000259457,9606.ENSP00000261303,9606.ENSP00000261479,9606.ENSP00000261712,9606.ENSP00000262193,9606.ENSP00000264639,9606.ENSP00000268058,9606.ENSP00000271308,9606.ENSP00000290541,9606.ENSP00000293362,…	PSMA4,PSMC4,PSMD5,PSMD8,PSMA3,PSME2,PSMD10,PSMD7,PSMA2,PSMB7,PSMC1,PSMA6,PSMD11,PSMB1,PSMD3,PML,PSMA5,PSMB4,PSME3,RAD21,PSMD1,PSMD2,PSMC5,PRKDC,CNOT1,CARM1,MRE11A,PSMF1,SFN,PSMD12,PSMB10,PSMB5,TPR,BUB3,PSMD4,BRCC3,PSMA7,PSMB2,RPA2,PSMB9,PSMB8,PCNA,PSME1,FHL1,ZNF207,CDK1,PSMD14,PSMC2,PSMD13,PSMC6,PRMT1,PSMD6,H2AFY,TNKS1BP1,CDK5RAP3,PSMD9,RPL26,PSMC3,PSMB3
GO:2001242	Regulation of intrinsic apoptotic signaling pathway	42	164	0.43	3.23e-06	9606.ENSP00000215754,9606.ENSP00000223136,9606.ENSP00000225174,9606.ENSP00000228251,9606.ENSP00000234590,9606.ENSP00000246957,9606.ENSP00000247470,9606.ENSP00000261735,9606.ENSP00000262613,9606.ENSP00000263774,9606.ENSP00000270142,9606.ENSP00000276079,9606.ENSP00000278572,9606.ENSP00000310670,9606.ENSP00000317992,9606.ENSP00000318176,9606.ENSP00000318822,9606.ENSP00000339095,9606.ENSP00000339191,…	MIF,FIS1,PPIF,YBX3,ENO1,TRAP1,PYCARD,ERP29,SLC9A3R1,NDUFS3,SOD1,NONO,RPS3,CCAR2,NOC2L,PRKRA,BID,RPS7,CAV1,SFPQ,PARP1,PTPN1,TXNDC12,VDAC2,NOX1,HDAC1,SRC,RPL11,HNRNPK,UBQLN1,DNAJA1,DDX3X,BCAP31,CD44,PARK7,NDUFA13,GNB2L1,BCLAF1,DNM1L,RPL26,TPT1,HYOU1
GO:0034249	Negative regulation of cellular amide metabolic process	39	154	0.43	1.08e-05	9606.ENSP00000220592,9606.ENSP00000220849,9606.ENSP00000229239,9606.ENSP00000240185,9606.ENSP00000252486,9606.ENSP00000254878,9606.ENSP00000256383,9606.ENSP00000268058,9606.ENSP00000269349,9606.ENSP00000278572,9606.ENSP00000305230,9606.ENSP00000313199,9606.ENSP00000317985,9606.ENSP00000318195,9606.ENSP00000318868,9606.ENSP00000320866,9606.ENSP00000320949,9606.ENSP00000336721,9606.ENSP00000340329,…	AGO2,EIF3E,GAPDH,TARDBP,APOE,HRSP12,EIF2S1,PML,EIF4A3,RPS3,SRP9,HNRNPD,ROCK2,NCL,SHMT1,CALR,CNOT1,LARP1,CAPRIN1,PRKAA1,PUS7,FXR1,EPRS,TPR,SYNCRIP,FMR1,YBX1,EIF6,HNRNPR,IGF2BP2,KHSRP,ROCK1,DDX3X,RBM4,ILF3,GNB2L1,SPON1,UPF1,YTHDF3
GO:0033875	Ribonucleoside bisphosphate metabolic process	33	129	0.43	5.98e-05	9606.ENSP00000205402,9606.ENSP00000215882,9606.ENSP00000253382,9606.ENSP00000253792,9606.ENSP00000265174,9606.ENSP00000265838,9606.ENSP00000278353,9606.ENSP00000280346,9606.ENSP00000289416,9606.ENSP00000303525,9606.ENSP00000307241,9606.ENSP00000308770,9606.ENSP00000316924,9606.ENSP00000343657,9606.ENSP00000348429,9606.ENSP00000350012,9606.ENSP00000353600,9606.ENSP00000356820,9606.ENSP00000358414,…	DLD,SLC25A1,ACSS2,ACLY,PAPSS1,ACAT1,HSD17B12,DLAT,ACSM3,CBR4,PDHB,SULT1B1,ACSS1,MCCC2,ACSL5,ACSL3,SULT1A4,MPC2,HMGCS2,PPCS,HMGCL,SUCLA2,ACOT9,PPT1,ACSF2,PAPSS2,SUCLG2,ABHD14B,HSD17B4,DBI,BPNT1,COASY,DGAT1
GO:0034032	Purine nucleoside bisphosphate metabolic process	33	129	0.43	5.98e-05	9606.ENSP00000205402,9606.ENSP00000215882,9606.ENSP00000253382,9606.ENSP00000253792,9606.ENSP00000265174,9606.ENSP00000265838,9606.ENSP00000278353,9606.ENSP00000280346,9606.ENSP00000289416,9606.ENSP00000303525,9606.ENSP00000307241,9606.ENSP00000308770,9606.ENSP00000316924,9606.ENSP00000343657,9606.ENSP00000348429,9606.ENSP00000350012,9606.ENSP00000353600,9606.ENSP00000356820,9606.ENSP00000358414,…	DLD,SLC25A1,ACSS2,ACLY,PAPSS1,ACAT1,HSD17B12,DLAT,ACSM3,CBR4,PDHB,SULT1B1,ACSS1,MCCC2,ACSL5,ACSL3,SULT1A4,MPC2,HMGCS2,PPCS,HMGCL,SUCLA2,ACOT9,PPT1,ACSF2,PAPSS2,SUCLG2,ABHD14B,HSD17B4,DBI,BPNT1,COASY,DGAT1
GO:0072329	Monocarboxylic acid catabolic process	30	118	0.43	0.00017	9606.ENSP00000216780,9606.ENSP00000220764,9606.ENSP00000221418,9606.ENSP00000242592,9606.ENSP00000263383,9606.ENSP00000265641,9606.ENSP00000265838,9606.ENSP00000267814,9606.ENSP00000285093,9606.ENSP00000293217,9606.ENSP00000301729,9606.ENSP00000303356,9606.ENSP00000325136,9606.ENSP00000333664,9606.ENSP00000346173,9606.ENSP00000356015,9606.ENSP00000357535,9606.ENSP00000359233,9606.ENSP00000360541,…	PCK2,DECR1,ECH1,ACADS,ILVBL,CPT1A,ACAT1,SORD,ACAA2,ACOX1,ECI1,DCXR,HADHB,ACAA1,ETFB,ACAT2,ECHS1,ABCD3,CPT2,SCP2,AKR1A1,PCCA,AMACR,FAH,IVD,PCCB,HSD17B4,ECHDC1,ETFA,HADH
GO:0006414	Translational elongation	30	119	0.43	0.00019	9606.ENSP00000081029,9606.ENSP00000216044,9606.ENSP00000245539,9606.ENSP00000253099,9606.ENSP00000254630,9606.ENSP00000256441,9606.ENSP00000258383,9606.ENSP00000258455,9606.ENSP00000279242,9606.ENSP00000305682,9606.ENSP00000307940,9606.ENSP00000313877,9606.ENSP00000315017,9606.ENSP00000322419,9606.ENSP00000322439,9606.ENSP00000331901,9606.ENSP00000333837,9606.ENSP00000336702,9606.ENSP00000339063,…	MRPS35,GTPBP1,MRPS7,MRPL4,PTCD3,MRPS36,MRPL44,MRPS9,MRPL49,MRPL39,EEF2,TSFM,MRPL1,RPLP2,TUFM,EEF1G,MRPL12,EIF5A,EEF1A1,MRPL37,MRPL24,DAP3,EEF1B2,MRPL19,MRPS6,MRPS22,GFM1,GNB2L1,MRPS27,MRPL45
GO:0007229	Integrin-mediated signaling pathway	24	94	0.43	0.001	9606.ENSP00000027335,9606.ENSP00000161559,9606.ENSP00000200181,9606.ENSP00000216181,9606.ENSP00000217289,9606.ENSP00000236850,9606.ENSP00000261023,9606.ENSP00000279227,9606.ENSP00000293379,9606.ENSP00000296585,9606.ENSP00000304408,9606.ENSP00000316029,9606.ENSP00000324422,9606.ENSP00000341189,9606.ENSP00000342858,9606.ENSP00000355361,9606.ENSP00000362680,9606.ENSP00000364585,9606.ENSP00000376886,…	CDH17,CEACAM1,ITGB4,MYH9,FERMT1,APOA1,ITGAV,FERMT3,ITGA5,ITGA2,COL3A1,TLN1,ZYX,PTK2,FERMT2,CD47,SRC,RCC2,NME1-NME2,ITGB1,ILK,CDC42,ITGA6,ITGA7
GO:0006903	Vesicle targeting	23	91	0.43	0.0016	9606.ENSP00000227266,9606.ENSP00000240851,9606.ENSP00000250244,9606.ENSP00000263354,9606.ENSP00000264933,9606.ENSP00000303145,9606.ENSP00000330945,9606.ENSP00000343405,9606.ENSP00000349486,9606.ENSP00000358071,9606.ENSP00000362807,9606.ENSP00000373312,9606.ENSP00000377390,9606.ENSP00000378721,9606.ENSP00000381293,9606.ENSP00000381823,9606.ENSP00000385432,9606.ENSP00000387286,9606.ENSP00000390783,…	CTSC,TFG,AP1M2,NAPA,PDCD6,TMED10,TMED9,SEC24C,SCRIB,SEC23IP,PEF1,SEC13,PPP6R3,SEC31A,NSF,SEC24A,SAR1B,RAB1A,SCFD1,PPP6C,GOLGA2,SEC24B,ARFGAP2
GO:0070849	Response to epidermal growth factor	12	47	0.43	0.045	9606.ENSP00000215832,9606.ENSP00000248444,9606.ENSP00000262027,9606.ENSP00000263025,9606.ENSP00000264705,9606.ENSP00000268182,9606.ENSP00000307288,9606.ENSP00000318195,9606.ENSP00000339063,9606.ENSP00000356448,9606.ENSP00000369500,9606.ENSP00000381607	MAPK1,VIL1,MARS,MAPK3,CAD,IQGAP1,MCM7,NCL,EEF1A1,TPR,SYAP1,GSTP1
GO:0046907	Intracellular transport	374	1520	0.42	5.58e-55	9606.ENSP00000000412,9606.ENSP00000054666,9606.ENSP00000215375,9606.ENSP00000215570,9606.ENSP00000215829,9606.ENSP00000216034,9606.ENSP00000219169,9606.ENSP00000220325,9606.ENSP00000221418,9606.ENSP00000221566,9606.ENSP00000222247,9606.ENSP00000223136,9606.ENSP00000223641,9606.ENSP00000225430,9606.ENSP00000225724,9606.ENSP00000227266,9606.ENSP00000229340,9606.ENSP00000229390,9606.ENSP00000230050,…	M6PR,VAMP3,ATP5D,TIMM13,SNRPD3,TOMM22,NUTF2,EHD4,ECH1,SGTA,RPL18A,FIS1,SEC61B,RPL19,GOSR1,CTSC,RAB35,SRSF9,RPS12,SNX3,CPSF3,VPS4B,TFG,SRSF6,NUP85,THOC2,PMPCB,COPB1,AP1M2,CORO7,RPS16,TSG101,APOE,XPO7,VPS25,NUP210,ARF3,DYNC1LI2,COG3,SRSF1,RPL35,LRPPRC,ARL3,NUP133,IPO5,ARL1,KPNA3,ERP29,SNX1,FAF2,ATP5B,TRAM1,RPL8,SLC9A3R1,RAB2A,CSE1L,CAPZA1,UFD1L,EHD2,NAPA,SPCS2,OSBP,ARCN1,AGPS,YWHAE,RAB10,PDCD6,GRPE…
GO:1901566	Organonitrogen compound biosynthetic process	331	1346	0.42	4.41e-48	9606.ENSP00000052754,9606.ENSP00000081029,9606.ENSP00000205402,9606.ENSP00000215375,9606.ENSP00000215882,9606.ENSP00000216044,9606.ENSP00000216190,9606.ENSP00000216554,9606.ENSP00000216605,9606.ENSP00000216951,9606.ENSP00000217244,9606.ENSP00000217971,9606.ENSP00000219302,9606.ENSP00000220592,9606.ENSP00000220849,9606.ENSP00000220966,9606.ENSP00000222247,9606.ENSP00000223029,9606.ENSP00000223127,…	DCN,MRPS35,DLD,ATP5D,SLC25A1,GTPBP1,EIF3D,EIF5,MTHFD1,GSS,CSNK2A1,PGRMC1,NME3,AGO2,EIF3E,PYCRL,RPL18A,AIMP2,PLOD3,RPL19,PNPO,DRG2,GCLC,RPS12,UMPS,MOGS,SPR,SARS,APOA1,ATIC,RPN2,PTGIS,GOT2,MRPS7,UROD,EIF3K,MPDU1,RPS16,APOE,EIF2S3,MRPL4,EIF3G,ACSS2,ACLY,PTCD3,EIF2S1,MRPS36,NARS,MRPL44,MRPS9,COG3,UGGT1,RPL35,AARS,EIF3J,PTPLAD1,MARS,ATP5B,LPCAT2,ALG1,RPL8,DARS,CPOX,CAD,GALNT7,VCAN,PAPSS1,EIF4H,ACAT1,L…
GO:0009057	Macromolecule catabolic process	264	1058	0.42	1.95e-38	9606.ENSP00000044462,9606.ENSP00000052754,9606.ENSP00000157812,9606.ENSP00000161559,9606.ENSP00000210313,9606.ENSP00000215071,9606.ENSP00000216455,9606.ENSP00000216802,9606.ENSP00000217958,9606.ENSP00000219313,9606.ENSP00000220166,9606.ENSP00000220849,9606.ENSP00000221566,9606.ENSP00000222247,9606.ENSP00000223321,9606.ENSP00000223641,9606.ENSP00000225430,9606.ENSP00000225726,9606.ENSP00000227266,…	PSMA4,DCN,PSMC4,CEACAM1,PSMD5,PSMD8,PSMA3,PSME2,PSMD10,PSMD7,CTSH,EIF3E,SGTA,RPL18A,PSMA2,SEC61B,RPL19,CCDC47,CTSC,PRPF19,USP5,RPS12,SKIV2L2,CTSD,VPS4B,C19orf43,RNF114,CLPP,RPS16,TSG101,APOE,LSM7,VPS25,HRSP12,UGGT1,KIAA0368,PSMB7,RPL35,PSMC1,HEXB,UBE2K,PSMA6,USP14,PSMD11,FAF2,PSMB1,RPL8,UFD1L,DCPS,PSMD3,RAB7A,VCAN,AMBP,PCNP,IDE,LUM,WDR61,PML,HEXA,COPS3,EIF4A3,RPS11,PSMA5,RPS27A,ERLIN2,RPS3,UCHL1,…
GO:0002831	Regulation of response to biotic stimulus	100	406	0.42	1.19e-13	9606.ENSP00000044462,9606.ENSP00000157812,9606.ENSP00000161559,9606.ENSP00000179259,9606.ENSP00000210313,9606.ENSP00000215071,9606.ENSP00000215754,9606.ENSP00000216129,9606.ENSP00000216455,9606.ENSP00000216802,9606.ENSP00000217958,9606.ENSP00000219313,9606.ENSP00000223321,9606.ENSP00000225698,9606.ENSP00000226574,9606.ENSP00000232003,9606.ENSP00000242351,9606.ENSP00000247470,9606.ENSP00000252486,…	PSMA4,PSMC4,CEACAM1,C12orf5,PSMD5,PSMD8,MIF,TTLL12,PSMA3,PSME2,PSMD10,PSMD7,PSMA2,C1QBP,NFKB1,HRG,ZC3HAV1,PYCARD,APOE,KRAS,PSMB7,PSMC1,UBE2K,PSMA6,PSMD11,PSMB1,DNAJA3,SAMHD1,MAPK3,UFD1L,PSMD3,PML,PSMA5,NONO,APPL1,PSMB4,PSME3,DTX3L,HMGB2,ABCE1,ERAP1,CRK,PSMD1,PSMD2,PSMC5,RBM14,PRKDC,PAK2,NPLOC4,LAMP1,PSMF1,SERPINB4,PSPC1,HMGB1,PSMD12,SFPQ,PSMB10,XRCC6,PCBP2,MATR3,STAT1,PSMB5,DHX9,IFI16,ADAR,PSMD4,…
GO:0043687	Post-translational protein modification	90	360	0.42	1.31e-12	9606.ENSP00000044462,9606.ENSP00000054950,9606.ENSP00000157812,9606.ENSP00000210313,9606.ENSP00000215071,9606.ENSP00000215727,9606.ENSP00000215909,9606.ENSP00000216455,9606.ENSP00000216802,9606.ENSP00000217958,9606.ENSP00000219313,9606.ENSP00000222399,9606.ENSP00000223321,9606.ENSP00000236850,9606.ENSP00000245907,9606.ENSP00000252486,9606.ENSP00000253023,9606.ENSP00000258341,9606.ENSP00000259457,…	PSMA4,RCN1,PSMC4,PSMD5,PSMD8,SERPIND1,LGALS1,PSMA3,PSME2,PSMD10,PSMD7,LAMB1,PSMA2,APOA1,C3,APOE,UBE2M,LAMC1,PSMB7,PSMC1,PSMA6,PSMD11,PSMB1,TCEB2,RAB2A,COPS4,PSMD3,KNG1,VCAN,TNC,COPS3,FN3KRP,PSMA5,RAB5A,APP,PSMB4,PSME3,STT3B,COPS2,HSP90B1,RAB8A,DDB1,COPS6,PSMD1,PSMD2,PSMC5,RAB11B,PSMF1,SUMF2,COPS8,ATG7,FN1,PSMD12,COPS5,ITIH2,PSMB10,UBA3,PSMB5,APOA2,PSMD4,PSMA7,PSMB2,COPS7B,PSMB9,PSMB8,UCHL3,RBBP7,…
GO:0070646	Protein modification by small protein removal	73	298	0.42	6.74e-10	9606.ENSP00000044462,9606.ENSP00000157812,9606.ENSP00000210313,9606.ENSP00000215071,9606.ENSP00000216455,9606.ENSP00000216802,9606.ENSP00000217958,9606.ENSP00000219313,9606.ENSP00000223321,9606.ENSP00000229268,9606.ENSP00000230085,9606.ENSP00000259457,9606.ENSP00000261303,9606.ENSP00000261479,9606.ENSP00000261601,9606.ENSP00000261712,9606.ENSP00000262193,9606.ENSP00000263202,9606.ENSP00000264389,…	PSMA4,PSMC4,PSMD5,PSMD8,PSMA3,PSME2,PSMD10,PSMD7,PSMA2,USP5,SNX3,PSMB7,PSMC1,PSMA6,USP14,PSMD11,PSMB1,UFD1L,COPS4,PSMD3,COPS3,PSMA5,RPS27A,UCHL1,PSMB4,PSME3,COPS2,COPS6,PSMD1,HCFC1,PSMD2,PSMC5,USP39,USP9X,RUVBL1,HGS,SHMT2,PSMF1,USP7,COPS8,PSMD12,COPS5,RAD23B,PSMB10,VCP,PSMB5,UCHL5,PSMD4,BRCC3,PSMA7,PSMB2,COPS7B,PSMB9,PSMB8,STAM,UCHL3,PSME1,GPS1,CDK1,PSMD14,UBA52,PSMC2,PSMD13,RHOA,PSMC6,PSMD6,EIF3…
GO:0030178	Negative regulation of wnt signaling pathway	54	218	0.42	1.63e-07	9606.ENSP00000044462,9606.ENSP00000157812,9606.ENSP00000210313,9606.ENSP00000215071,9606.ENSP00000216455,9606.ENSP00000216802,9606.ENSP00000217289,9606.ENSP00000217958,9606.ENSP00000219313,9606.ENSP00000223321,9606.ENSP00000229795,9606.ENSP00000252486,9606.ENSP00000259457,9606.ENSP00000261303,9606.ENSP00000261479,9606.ENSP00000261712,9606.ENSP00000262193,9606.ENSP00000262613,9606.ENSP00000264639,…	PSMA4,PSMC4,PSMD5,PSMD8,PSMA3,PSME2,FERMT1,PSMD10,PSMD7,PSMA2,MAPK14,APOE,PSMB7,PSMC1,PSMA6,PSMD11,PSMB1,SLC9A3R1,PSMD3,PSMA5,APP,PSMB4,PSME3,PSMD1,PSMD2,PSMC5,PSMF1,CAV1,PSMD12,PSMB10,PSMB5,PSMD4,PSMA7,STK4,PSMB2,HDAC1,PSMB9,PSMB8,PSME1,G3BP1,CTNND1,PSMD14,PSMC2,PSMD13,PSMC6,PSMD6,CSNK1A1,GNB2L1,PSMD9,PFDN5,RNF213,RUVBL2,PSMC3,PSMB3
GO:0044272	Sulfur compound biosynthetic process	44	179	0.42	4.26e-06	9606.ENSP00000052754,9606.ENSP00000205402,9606.ENSP00000215882,9606.ENSP00000216605,9606.ENSP00000216951,9606.ENSP00000229416,9606.ENSP00000253382,9606.ENSP00000253792,9606.ENSP00000265077,9606.ENSP00000265174,9606.ENSP00000265838,9606.ENSP00000266718,9606.ENSP00000273920,9606.ENSP00000275428,9606.ENSP00000278353,9606.ENSP00000280346,9606.ENSP00000303147,9606.ENSP00000303525,9606.ENSP00000307241,…	DCN,DLD,SLC25A1,MTHFD1,GSS,GCLC,ACSS2,ACLY,VCAN,PAPSS1,ACAT1,LUM,ENOPH1,GGCT,HSD17B12,DLAT,MAT2A,CBR4,PDHB,CSPG4,ACSS1,UGDH,MAT2B,CNDP2,BGN,ADI1,PRELP,FMOD,ACSL5,ACSL3,MPC2,MGST3,GSTO1,AKR1A1,PPCS,ESD,MGST1,MPST,HAGH,GSTP1,PPT1,PAPSS2,GSTK1,OPLAH
GO:1903900	Regulation of viral life cycle	38	153	0.42	2.17e-05	9606.ENSP00000215909,9606.ENSP00000230085,9606.ENSP00000238497,9606.ENSP00000242351,9606.ENSP00000251968,9606.ENSP00000253024,9606.ENSP00000254436,9606.ENSP00000261875,9606.ENSP00000268058,9606.ENSP00000286713,9606.ENSP00000301764,9606.ENSP00000303754,9606.ENSP00000306614,9606.ENSP00000309142,9606.ENSP00000310275,9606.ENSP00000313007,9606.ENSP00000323889,9606.ENSP00000336721,9606.ENSP00000345656,…	LGALS1,SNX3,VPS4B,ZC3HAV1,TSG101,TRIM28,TRIM21,PTPLAD1,PML,STOM,DDB1,PPID,PPIH,PDE12,BANF1,PABPC1,TRIM25,LARP1,VAPA,HLA-DRB1,IFI16,ADAR,FMR1,STAU1,KPNA6,GSN,SRPK1,LGALS9,IFITM3,DDX3X,IFITM1,TOP2B,ILF3,TOP2A,VAPB,PPIA,HSPA8,PHB
GO:0051701	Interaction with host	37	151	0.42	3.76e-05	9606.ENSP00000229239,9606.ENSP00000238497,9606.ENSP00000245838,9606.ENSP00000261023,9606.ENSP00000261667,9606.ENSP00000261769,9606.ENSP00000265062,9606.ENSP00000265986,9606.ENSP00000290158,9606.ENSP00000293379,9606.ENSP00000296585,9606.ENSP00000303754,9606.ENSP00000317334,9606.ENSP00000333298,9606.ENSP00000334373,9606.ENSP00000339191,9606.ENSP00000344456,9606.ENSP00000346067,9606.ENSP00000346437,…	GAPDH,VPS4B,THOC2,ITGAV,KPNA3,CDH1,RAB7A,IDE,KPNB1,ITGA5,ITGA2,PPID,TCP1,LAMP1,KPNA4,CAV1,CTNNB1,RPSA,ATG7,SCRIB,TFRC,F11R,SRC,KPNA6,GRB2,CDK1,ITGB1,DDX39B,CTNND1,VAPB,PPIA,ALYREF,IST1,PHB2,SLC1A5,MRC1,PHB
GO:0031333	Negative regulation of protein-containing complex assembly	33	133	0.42	0.0001	9606.ENSP00000001008,9606.ENSP00000248444,9606.ENSP00000259365,9606.ENSP00000262215,9606.ENSP00000263168,9606.ENSP00000263867,9606.ENSP00000264071,9606.ENSP00000264758,9606.ENSP00000299138,9606.ENSP00000303908,9606.ENSP00000308753,9606.ENSP00000327255,9606.ENSP00000345347,9606.ENSP00000347719,9606.ENSP00000348381,9606.ENSP00000349259,9606.ENSP00000356257,9606.ENSP00000357129,9606.ENSP00000361635,…	FKBP4,VIL1,TMOD1,ARFGEF1,CAPZA1,CAPG,TUBB4A,ADD1,VPS35,TWF2,TMOD3,PPM1A,HMGB1,TBCD,ADD3,SPTBN1,LMOD1,SPTA1,VDAC2,SPTAN1,SRC,GSN,MAPRE1,DDX3X,CDC42,CAPZB,LAMP2,STMN1,PARK7,FAM49B,CRYAB,TWF1,SPTB
GO:0010811	Positive regulation of cell-substrate adhesion	31	124	0.42	0.00016	9606.ENSP00000199764,9606.ENSP00000217289,9606.ENSP00000219022,9606.ENSP00000225698,9606.ENSP00000232003,9606.ENSP00000236850,9606.ENSP00000246792,9606.ENSP00000264187,9606.ENSP00000268182,9606.ENSP00000278353,9606.ENSP00000293379,9606.ENSP00000300574,9606.ENSP00000320866,9606.ENSP00000326888,9606.ENSP00000331544,9606.ENSP00000346300,9606.ENSP00000346839,9606.ENSP00000348461,9606.ENSP00000358866,…	CEACAM6,FERMT1,OLFM4,C1QBP,HRG,APOA1,RRAS,NID1,IQGAP1,HSD17B12,ITGA5,CRK,CALR,LIMS2,FBLN1,CRKL,FN1,RAC1,FLNA,STK4,RSU1,EMILIN1,DNM2,JUP,ILK,ROCK1,CDC42,FBLN2,ITGA6,AGR2,TSTA3
GO:1903578	Regulation of atp metabolic process	30	122	0.42	0.00029	9606.ENSP00000179259,9606.ENSP00000225174,9606.ENSP00000234590,9606.ENSP00000245544,9606.ENSP00000254508,9606.ENSP00000261396,9606.ENSP00000283195,9606.ENSP00000284981,9606.ENSP00000285968,9606.ENSP00000309142,9606.ENSP00000310668,9606.ENSP00000323867,9606.ENSP00000333667,9606.ENSP00000346148,9606.ENSP00000351777,9606.ENSP00000354876,9606.ENSP00000355759,9606.ENSP00000356448,9606.ENSP00000362413,…	C12orf5,PPIF,ENO1,NUP85,NUP210,NUP133,RANBP2,APP,NUP205,PDE12,NUP93,PRKAG1,SHMT2,PRKAA1,VCP,MT-CO2,PARP1,TPR,PGK1,EIF6,NUP160,SEC13,CDK1,RAE1,SLC25A12,RHOA,FBP1,PARK7,DNM1L,NUP62
GO:0032543	Mitochondrial translation	28	114	0.42	0.00052	9606.ENSP00000081029,9606.ENSP00000245539,9606.ENSP00000253099,9606.ENSP00000254630,9606.ENSP00000256441,9606.ENSP00000258383,9606.ENSP00000258455,9606.ENSP00000261772,9606.ENSP00000279242,9606.ENSP00000305682,9606.ENSP00000313877,9606.ENSP00000315017,9606.ENSP00000322439,9606.ENSP00000333837,9606.ENSP00000354086,9606.ENSP00000354525,9606.ENSP00000355086,9606.ENSP00000355889,9606.ENSP00000357320,…	MRPS35,MRPS7,MRPL4,PTCD3,MRPS36,MRPL44,MRPS9,AARS,MRPL49,MRPL39,TSFM,MRPL1,TUFM,MRPL12,MRPL37,MRPL24,DARS2,IARS2,DAP3,GARS,MRPL19,MRPS6,MRPS22,GFM1,HARS,MRPS27,SARS2,MRPL45
GO:0097237	Cellular response to toxic substance	27	109	0.42	0.00062	9606.ENSP00000221130,9606.ENSP00000223136,9606.ENSP00000252486,9606.ENSP00000262746,9606.ENSP00000265462,9606.ENSP00000270142,9606.ENSP00000295834,9606.ENSP00000298510,9606.ENSP00000319788,9606.ENSP00000342026,9606.ENSP00000352584,9606.ENSP00000354612,9606.ENSP00000356864,9606.ENSP00000358727,9606.ENSP00000361140,9606.ENSP00000363641,9606.ENSP00000367992,9606.ENSP00000369586,9606.ENSP00000370750,…	GSR,FIS1,APOE,PRDX1,PRDX5,SOD1,FABP1,PRDX3,NQO1,PRDX6,AKR1B10,PTGS1,MGST3,GSTO1,AKR1A1,TXN,ESD,HBE1,RDH11,SOD3,GPX2,MGST1,GSTP1,PARK7,GSTK1,TXNRD1,FAM213A
GO:0034404	Nucleobase-containing small molecule biosynthetic process	26	105	0.42	0.00083	9606.ENSP00000219302,9606.ENSP00000232607,9606.ENSP00000245552,9606.ENSP00000262878,9606.ENSP00000264705,9606.ENSP00000265838,9606.ENSP00000286621,9606.ENSP00000298556,9606.ENSP00000304229,9606.ENSP00000321584,9606.ENSP00000322524,9606.ENSP00000337060,9606.ENSP00000338352,9606.ENSP00000339479,9606.ENSP00000351777,9606.ENSP00000354532,9606.ENSP00000367615,9606.ENSP00000369456,9606.ENSP00000370376,…	NME3,UMPS,NT5C,SAMHD1,CAD,ACAT1,ADK,HPRT1,HINT1,IMPDH2,DCTPP1,NME1,NUDT4,NT5C2,VCP,PNP,APRT,ITPA,DUT,NME1-NME2,CNP,HDHD1,DERA,NUDT5,GMPS,NUDT16
GO:1903363	Negative regulation of cellular protein catabolic process	22	89	0.42	0.0028	9606.ENSP00000037243,9606.ENSP00000217244,9606.ENSP00000221566,9606.ENSP00000261601,9606.ENSP00000268058,9606.ENSP00000299138,9606.ENSP00000300231,9606.ENSP00000310670,9606.ENSP00000338039,9606.ENSP00000339095,9606.ENSP00000343535,9606.ENSP00000346032,9606.ENSP00000346483,9606.ENSP00000356425,9606.ENSP00000359345,9606.ENSP00000360609,9606.ENSP00000363676,9606.ENSP00000365131,9606.ENSP00000376753,…	GABARAPL2,CSNK2A1,SGTA,USP14,PML,VPS35,MAP1A,CCAR2,PSMF1,RPS7,USP7,ANXA2,DDRGK1,UCHL5,RPL5,HSP90AB1,RPL11,BAG6,GIPC1,PARK7,RPL23,CDK5RAP3
GO:0031397	Negative regulation of protein ubiquitination	19	76	0.42	0.0062	9606.ENSP00000229416,9606.ENSP00000278572,9606.ENSP00000296161,9606.ENSP00000307863,9606.ENSP00000339095,9606.ENSP00000339191,9606.ENSP00000354040,9606.ENSP00000358283,9606.ENSP00000359345,9606.ENSP00000359727,9606.ENSP00000363676,9606.ENSP00000366565,9606.ENSP00000369127,9606.ENSP00000374455,9606.ENSP00000380460,9606.ENSP00000418770,9606.ENSP00000419782,9606.ENSP00000420311,9606.ENSP00000444357	GCLC,RPS3,DTX3L,U2AF2,RPS7,CAV1,GTPBP4,UFL1,RPL5,BAG2,RPL11,VPS28,DNAJA1,SQSTM1,PLAA,PARK7,CDK5,RPL23,OTUB1
GO:1903051	Negative regulation of proteolysis involved in cellular protein catabolic process	19	76	0.42	0.0062	9606.ENSP00000037243,9606.ENSP00000217244,9606.ENSP00000221566,9606.ENSP00000261601,9606.ENSP00000268058,9606.ENSP00000300231,9606.ENSP00000310670,9606.ENSP00000338039,9606.ENSP00000339095,9606.ENSP00000343535,9606.ENSP00000346483,9606.ENSP00000356425,9606.ENSP00000359345,9606.ENSP00000360609,9606.ENSP00000363676,9606.ENSP00000365131,9606.ENSP00000376753,9606.ENSP00000418770,9606.ENSP00000420311	GABARAPL2,CSNK2A1,SGTA,USP14,PML,MAP1A,CCAR2,PSMF1,RPS7,USP7,DDRGK1,UCHL5,RPL5,HSP90AB1,RPL11,BAG6,GIPC1,PARK7,RPL23
GO:0048010	Vascular endothelial growth factor receptor signaling pathway	17	69	0.42	0.0128	9606.ENSP00000229795,9606.ENSP00000261023,9606.ENSP00000264933,9606.ENSP00000267257,9606.ENSP00000300574,9606.ENSP00000314067,9606.ENSP00000317985,9606.ENSP00000335153,9606.ENSP00000341189,9606.ENSP00000348461,9606.ENSP00000356505,9606.ENSP00000362680,9606.ENSP00000365312,9606.ENSP00000382697,9606.ENSP00000383118,9606.ENSP00000400175,9606.ENSP00000483313	MAPK14,ITGAV,PDCD6,PXN,CRK,PAK2,ROCK2,HSP90AA1,PTK2,RAC1,NCF2,SRC,ABI1,ROCK1,CDC42,RHOA,WASF2
GO:0042440	Pigment metabolic process	16	65	0.42	0.0174	9606.ENSP00000216605,9606.ENSP00000217971,9606.ENSP00000246337,9606.ENSP00000264193,9606.ENSP00000265132,9606.ENSP00000298556,9606.ENSP00000313490,9606.ENSP00000318868,9606.ENSP00000361512,9606.ENSP00000367615,9606.ENSP00000381386,9606.ENSP00000382595,9606.ENSP00000419851,9606.ENSP00000444561,9606.ENSP00000477572,9606.ENSP00000478253	MTHFD1,PGRMC1,UROD,CPOX,AMBP,HPRT1,PFAS,SHMT1,PRPS1,APRT,DDT,PAICS,GMPS,TMEM14C,HMOX2,MTHFD1L
GO:0051851	Modulation by host of symbiont process	15	61	0.42	0.0235	9606.ENSP00000240185,9606.ENSP00000252486,9606.ENSP00000255030,9606.ENSP00000261531,9606.ENSP00000286713,9606.ENSP00000345656,9606.ENSP00000346032,9606.ENSP00000359506,9606.ENSP00000362649,9606.ENSP00000367208,9606.ENSP00000417175,9606.ENSP00000432083,9606.ENSP00000432660,9606.ENSP00000479488,9606.ENSP00000481029	TARDBP,APOE,CRP,SNW1,STOM,VAPA,ANXA2,FMR1,HDAC1,SUGT1,VAPB,HSPA8,CFL1,PHB,PSMC3
GO:0008637	Apoptotic mitochondrial changes	14	57	0.42	0.0317	9606.ENSP00000223136,9606.ENSP00000225174,9606.ENSP00000275428,9606.ENSP00000281456,9606.ENSP00000285093,9606.ENSP00000290573,9606.ENSP00000299138,9606.ENSP00000310670,9606.ENSP00000318822,9606.ENSP00000340989,9606.ENSP00000373620,9606.ENSP00000392709,9606.ENSP00000445806,9606.ENSP00000449089	FIS1,PPIF,GGCT,SLC25A4,ACAA2,HK2,VPS35,CCAR2,BID,SFN,HSPD1,NDUFS1,TIMM50,DNM1L
GO:0035194	Post-transcriptional gene silencing by rna	14	57	0.42	0.0317	9606.ENSP00000220592,9606.ENSP00000258383,9606.ENSP00000265351,9606.ENSP00000318176,9606.ENSP00000320949,9606.ENSP00000346694,9606.ENSP00000355599,9606.ENSP00000356520,9606.ENSP00000357459,9606.ENSP00000363574,9606.ENSP00000374332,9606.ENSP00000386894,9606.ENSP00000446215,9606.ENSP00000480421	AGO2,MRPL44,XPO5,PRKRA,CNOT1,HNRNPA2B1,TSNAX,DHX9,ADAR,EIF6,TSN,RBM4,RAN,SRRT
GO:0006998	Nuclear envelope organization	13	52	0.42	0.0381	9606.ENSP00000240185,9606.ENSP00000310275,9606.ENSP00000310668,9606.ENSP00000324804,9606.ENSP00000325074,9606.ENSP00000354791,9606.ENSP00000357283,9606.ENSP00000361845,9606.ENSP00000378699,9606.ENSP00000380378,9606.ENSP00000384015,9606.ENSP00000408695,9606.ENSP00000418529	TARDBP,BANF1,NUP93,PPP2R1A,PPP2R2A,DCTN1,LMNA,ZMPSTE24,CDK1,PAFAH1B1,SUN1,PRKCA,NSFL1C
GO:0043331	Response to dsrna	13	53	0.42	0.0427	9606.ENSP00000215832,9606.ENSP00000226574,9606.ENSP00000263025,9606.ENSP00000272519,9606.ENSP00000296930,9606.ENSP00000309142,9606.ENSP00000334153,9606.ENSP00000339191,9606.ENSP00000346120,9606.ENSP00000356520,9606.ENSP00000365569,9606.ENSP00000367123,9606.ENSP00000370745	MAPK1,NFKB1,MAPK3,RALB,NPM1,PDE12,RFTN1,CAV1,DDX21,DHX9,FLOT1,SLC3A2,DDX1
GO:0044271	Cellular nitrogen compound biosynthetic process	365	1522	0.41	3.13e-51	9606.ENSP00000012443,9606.ENSP00000081029,9606.ENSP00000205402,9606.ENSP00000210444,9606.ENSP00000215375,9606.ENSP00000215829,9606.ENSP00000215832,9606.ENSP00000215882,9606.ENSP00000216044,9606.ENSP00000216190,9606.ENSP00000216297,9606.ENSP00000216410,9606.ENSP00000216554,9606.ENSP00000216605,9606.ENSP00000216951,9606.ENSP00000217109,9606.ENSP00000217971,9606.ENSP00000219302,9606.ENSP00000220592,…	PPP5C,MRPS35,DLD,NANS,ATP5D,SNRPD3,MAPK1,SLC25A1,GTPBP1,EIF3D,SUPT16H,GNPNAT1,EIF5,MTHFD1,GSS,CSTF1,PGRMC1,NME3,AGO2,EIF3E,RPL18A,AIMP2,RPL19,PNPO,DRG2,NFKB1,GCLC,RPS12,UMPS,SPR,SARS,ATIC,CPSF3,TARDBP,PTGIS,HIST1H4F,MRPS7,NT5C,UROD,EIF3K,RPS16,TRIM28,EIF2S3,MRPL4,EIF3G,ACSS2,ACLY,PPP1R1B,PTCD3,RPA1,EIF2S1,MRPS36,NARS,MRPL44,MRPS9,RPL35,SNW1,AARS,EIF3J,MARS,ATP5B,TCEB2,RPL8,SAMHD1,MAPK3,UFD1L,LIG1…
GO:0006790	Sulfur compound metabolic process	86	355	0.41	1.96e-11	9606.ENSP00000052754,9606.ENSP00000205402,9606.ENSP00000215882,9606.ENSP00000216605,9606.ENSP00000216951,9606.ENSP00000217426,9606.ENSP00000221130,9606.ENSP00000229416,9606.ENSP00000253382,9606.ENSP00000253792,9606.ENSP00000260324,9606.ENSP00000261416,9606.ENSP00000265077,9606.ENSP00000265174,9606.ENSP00000265594,9606.ENSP00000265838,9606.ENSP00000266718,9606.ENSP00000268097,9606.ENSP00000270142,…	DCN,DLD,SLC25A1,MTHFD1,GSS,AHCY,GSR,GCLC,ACSS2,ACLY,SQRDL,HEXB,VCAN,PAPSS1,MCCC1,ACAT1,LUM,HEXA,SOD1,ENOPH1,GGCT,HSD17B12,DLAT,NUBP1,ACSM3,ETHE1,HSPA9,MAT2A,CBR4,BOLA2B,GLB1,PDHB,SULT1B1,CSPG4,ACSS1,UGDH,MAT2B,CNDP2,BGN,ADI1,STAT5A,MCCC2,PRELP,FMOD,ACSL5,ACSL3,SULT1A4,MPC2,MGST3,GLRX3,HMGCS2,PHGDH,GSTO1,AHCYL1,AKR1A1,PPCS,GLO1,HMGCL,PCCA,SUCLA2,ESD,ACOT9,DPEP1,CIAPIN1,MGST1,MPST,HAGH,GSTP1,SMS,TS…
GO:0032271	Regulation of protein polymerization	56	232	0.41	1.85e-07	9606.ENSP00000001008,9606.ENSP00000228825,9606.ENSP00000245932,9606.ENSP00000247470,9606.ENSP00000248444,9606.ENSP00000259365,9606.ENSP00000262215,9606.ENSP00000262428,9606.ENSP00000262942,9606.ENSP00000263168,9606.ENSP00000263238,9606.ENSP00000263867,9606.ENSP00000264071,9606.ENSP00000264758,9606.ENSP00000278572,9606.ENSP00000292385,9606.ENSP00000294742,9606.ENSP00000296755,9606.ENSP00000298316,…	FKBP4,ARPC3,VASP,PYCARD,VIL1,TMOD1,ARFGEF1,COTL1,ARPC1A,CAPZA1,ACTR3,CAPG,TUBB4A,ADD1,RPS3,DBN1,ARPC5,MAP1B,ARF6,TWF2,TMOD3,HCLS1,DRG1,HSP90AA1,TBCD,ADD3,RAC1,SPTBN1,GMFB,MYO1C,DCTN1,LMOD1,SPTA1,ARHGAP18,VDAC2,SPTAN1,GSN,MAPRE1,CTTN,ACTR2,GRB2,NUMA1,CORO1B,CTNNA2,ARPC4,ARFIP1,RHOA,CAPZB,STMN1,DBNL,FAM49B,CKAP5,TWF1,SPTB,TPPP3,WASF2
GO:0032984	Protein-containing complex disassembly	55	229	0.41	2.87e-07	9606.ENSP00000037243,9606.ENSP00000081029,9606.ENSP00000216297,9606.ENSP00000238497,9606.ENSP00000245539,9606.ENSP00000248444,9606.ENSP00000251968,9606.ENSP00000253099,9606.ENSP00000253237,9606.ENSP00000254630,9606.ENSP00000256441,9606.ENSP00000258383,9606.ENSP00000258455,9606.ENSP00000263354,9606.ENSP00000269886,9606.ENSP00000279242,9606.ENSP00000296456,9606.ENSP00000296577,9606.ENSP00000303908,…	GABARAPL2,MRPS35,SUPT16H,VPS4B,MRPS7,VIL1,TSG101,MRPL4,GRWD1,PTCD3,MRPS36,MRPL44,MRPS9,NAPA,SH3GL1,MRPL49,APEH,ABCE1,TWF2,MRPL39,KIF5B,GAK,MRPL1,PPP1CA,MRPL12,CAV1,CTNNB1,VCP,ETF1,MRPL37,MRPL24,VTA1,DAP3,SET,UBQLN1,MRPL19,CHMP1A,NSF,MRPS6,SMARCD2,GSPT1,LAMP2,STMN1,KLC1,MRPS22,RPL23,CSNK1A1,MRPS27,HSPA8,CFL1,CKAP5,TRMT112,IST1,TWF1,MRPL45
GO:0050792	Regulation of viral process	52	215	0.41	5.7e-07	9606.ENSP00000215909,9606.ENSP00000230085,9606.ENSP00000238497,9606.ENSP00000240185,9606.ENSP00000242351,9606.ENSP00000251968,9606.ENSP00000252486,9606.ENSP00000253024,9606.ENSP00000254436,9606.ENSP00000255030,9606.ENSP00000261531,9606.ENSP00000261875,9606.ENSP00000265062,9606.ENSP00000268058,9606.ENSP00000286713,9606.ENSP00000301764,9606.ENSP00000303754,9606.ENSP00000306614,9606.ENSP00000309142,…	LGALS1,SNX3,VPS4B,TARDBP,ZC3HAV1,TSG101,APOE,TRIM28,TRIM21,CRP,SNW1,PTPLAD1,RAB7A,PML,STOM,DDB1,PPID,PPIH,PDE12,BANF1,PABPC1,TRIM25,FBLN1,LARP1,VAPA,HLA-DRB1,STAT1,DHX9,IFI16,ADAR,FMR1,STAU1,HDAC1,KPNA6,GSN,SRPK1,POLR2B,LGALS9,IFITM3,DDX3X,IFITM1,TOP2B,ILF3,TOP2A,POLR2H,VAPB,PPIA,HSPA8,CFL1,PHB,POLR2A,PSMC3
GO:0006986	Response to unfolded protein	40	166	0.41	2.17e-05	9606.ENSP00000233893,9606.ENSP00000247461,9606.ENSP00000254322,9606.ENSP00000256383,9606.ENSP00000261942,9606.ENSP00000262455,9606.ENSP00000264758,9606.ENSP00000281938,9606.ENSP00000290949,9606.ENSP00000295770,9606.ENSP00000297185,9606.ENSP00000299427,9606.ENSP00000299767,9606.ENSP00000302961,9606.ENSP00000307260,9606.ENSP00000310111,9606.ENSP00000316029,9606.ENSP00000318687,9606.ENSP00000320866,…	HSPE1,CANX,DNAJB1,EIF2S1,FAF2,ERP44,ADD1,HSPB8,ATP6V0D1,STT3B,HSPA9,TPP1,HSP90B1,HSPA4,TBL2,HSPB7,TLN1,HSPH1,CALR,HSP90AA1,GFPT1,VCP,DCTN1,HDGF,LMNA,BAG3,HSP90AB1,PTPN1,OPTN,DNAJA1,HSPD1,SEC31A,ERO1L,VAPB,SRPRB,HSPA8,CDK5RAP3,ASNA1,DNAJC3,HYOU1
GO:0019318	Hexose metabolic process	38	157	0.41	3.53e-05	9606.ENSP00000215882,9606.ENSP00000216780,9606.ENSP00000225665,9606.ENSP00000226253,9606.ENSP00000229239,9606.ENSP00000229270,9606.ENSP00000229795,9606.ENSP00000234590,9606.ENSP00000245206,9606.ENSP00000265641,9606.ENSP00000267814,9606.ENSP00000269848,9606.ENSP00000280346,9606.ENSP00000290573,9606.ENSP00000297258,9606.ENSP00000303356,9606.ENSP00000306920,9606.ENSP00000307241,9606.ENSP00000308610,…	SLC25A1,PCK2,SLC25A11,ALDOC,GAPDH,TPI1,MAPK14,ENO1,GOT2,CPT1A,SORD,PFKL,DLAT,HK2,FABP5,DCXR,GLB1,PDHB,GPD2,ADPGK,PKM,MDH2,PRKAA1,SLC39A14,AKR1A1,PGK1,FUCA1,POFUT1,PGM2,DAK,PGM5,SLC25A12,MAN2B1,SLC25A13,GPI,FBP1,SLC25A10,GALE
GO:0002576	Platelet degranulation	31	129	0.41	0.0003	9606.ENSP00000232003,9606.ENSP00000236850,9606.ENSP00000248437,9606.ENSP00000262776,9606.ENSP00000265023,9606.ENSP00000270142,9606.ENSP00000279227,9606.ENSP00000284719,9606.ENSP00000284981,9606.ENSP00000291295,9606.ENSP00000296130,9606.ENSP00000308938,9606.ENSP00000316029,9606.ENSP00000321853,9606.ENSP00000332139,9606.ENSP00000346839,9606.ENSP00000353025,9606.ENSP00000355467,9606.ENSP00000356218,…	HRG,APOA1,TUBA4A,LGALS3BP,KNG1,SOD1,FERMT3,OLA1,APP,CALM3,CLEC3B,PLG,TLN1,SERPINF2,CFD,FN1,FAM3C,SCCPDH,CYB5R1,TAGLN2,ECM1,FLNA,PROS1,ACTN1,TF,AHSG,CHID1,LAMP2,STXBP2,ITIH3,FAM49B
GO:0009063	Cellular amino acid catabolic process	30	124	0.41	0.00036	9606.ENSP00000168216,9606.ENSP00000205402,9606.ENSP00000217426,9606.ENSP00000245206,9606.ENSP00000254878,9606.ENSP00000265395,9606.ENSP00000265594,9606.ENSP00000265838,9606.ENSP00000277865,9606.ENSP00000281243,9606.ENSP00000284031,9606.ENSP00000299299,9606.ENSP00000317379,9606.ENSP00000318868,9606.ENSP00000322991,9606.ENSP00000333667,9606.ENSP00000343657,9606.ENSP00000352706,9606.ENSP00000357838,…	HSD17B10,DLD,AHCY,GOT2,HRSP12,HIBADH,MCCC1,ACAT1,GLUD1,QDPR,DDAH1,PCBD1,GLS,SHMT1,BCAT2,SHMT2,MCCC2,HIBCH,OAT,ACADSB,DBT,HMGCL,ALDH4A1,MPST,FAH,TST,ALDH7A1,PCYOX1,IVD,ALDH6A1
GO:0031032	Actomyosin structure organization	27	111	0.41	0.00078	9606.ENSP00000216181,9606.ENSP00000252456,9606.ENSP00000259365,9606.ENSP00000308753,9606.ENSP00000317985,9606.ENSP00000324422,9606.ENSP00000324573,9606.ENSP00000338481,9606.ENSP00000343158,9606.ENSP00000345259,9606.ENSP00000351022,9606.ENSP00000355124,9606.ENSP00000355645,9606.ENSP00000356257,9606.ENSP00000356275,9606.ENSP00000357005,9606.ENSP00000360293,9606.ENSP00000360305,9606.ENSP00000362680,…	MYH9,CNN1,TMOD1,TMOD3,ROCK2,ZYX,FLII,EPB41L2,EPB41L3,EPB41,TPM1,KRT19,ACTA1,LMOD1,CSRP1,F11R,SORBS1,PDLIM1,SRC,ITGB1,MYH11,PGM5,ROCK1,RHOA,PDCD6IP,ACTG1,MYH14
GO:0006415	Translational termination	24	99	0.41	0.0019	9606.ENSP00000081029,9606.ENSP00000245539,9606.ENSP00000253099,9606.ENSP00000254630,9606.ENSP00000256441,9606.ENSP00000258383,9606.ENSP00000258455,9606.ENSP00000279242,9606.ENSP00000296456,9606.ENSP00000296577,9606.ENSP00000305682,9606.ENSP00000315017,9606.ENSP00000333837,9606.ENSP00000353741,9606.ENSP00000354086,9606.ENSP00000354525,9606.ENSP00000357320,9606.ENSP00000377486,9606.ENSP00000382250,…	MRPS35,MRPS7,MRPL4,PTCD3,MRPS36,MRPL44,MRPS9,MRPL49,APEH,ABCE1,MRPL39,MRPL1,MRPL12,ETF1,MRPL37,MRPL24,DAP3,MRPL19,MRPS6,GSPT1,MRPS22,MRPS27,TRMT112,MRPL45
GO:0051262	Protein tetramerization	22	90	0.41	0.0032	9606.ENSP00000168216,9606.ENSP00000245932,9606.ENSP00000249750,9606.ENSP00000262878,9606.ENSP00000266679,9606.ENSP00000269848,9606.ENSP00000281828,9606.ENSP00000284981,9606.ENSP00000298556,9606.ENSP00000300291,9606.ENSP00000300738,9606.ENSP00000303525,9606.ENSP00000317379,9606.ENSP00000318868,9606.ENSP00000320309,9606.ENSP00000333667,9606.ENSP00000345412,9606.ENSP00000346827,9606.ENSP00000353099,…	HSD17B10,VASP,ALDH1A2,SAMHD1,CPSF6,PFKL,FARSB,APP,HPRT1,NUDT21,RRM1,CBR4,GLS,SHMT1,FARSA,SHMT2,CPSF7,ALDH9A1,HLA-DRB1,RRM2,GOLGA2,B2M
GO:0070125	Mitochondrial translational elongation	22	90	0.41	0.0032	9606.ENSP00000081029,9606.ENSP00000245539,9606.ENSP00000253099,9606.ENSP00000254630,9606.ENSP00000256441,9606.ENSP00000258383,9606.ENSP00000258455,9606.ENSP00000279242,9606.ENSP00000305682,9606.ENSP00000313877,9606.ENSP00000315017,9606.ENSP00000322439,9606.ENSP00000333837,9606.ENSP00000354086,9606.ENSP00000354525,9606.ENSP00000357320,9606.ENSP00000377486,9606.ENSP00000382250,9606.ENSP00000418008,…	MRPS35,MRPS7,MRPL4,PTCD3,MRPS36,MRPL44,MRPS9,MRPL49,MRPL39,TSFM,MRPL1,TUFM,MRPL12,MRPL37,MRPL24,DAP3,MRPL19,MRPS6,MRPS22,GFM1,MRPS27,MRPL45
GO:0098869	Cellular oxidant detoxification	22	90	0.41	0.0032	9606.ENSP00000221130,9606.ENSP00000252486,9606.ENSP00000262746,9606.ENSP00000265462,9606.ENSP00000270142,9606.ENSP00000295834,9606.ENSP00000298510,9606.ENSP00000319788,9606.ENSP00000342026,9606.ENSP00000354612,9606.ENSP00000356864,9606.ENSP00000358727,9606.ENSP00000363641,9606.ENSP00000369586,9606.ENSP00000371554,9606.ENSP00000374265,9606.ENSP00000379512,9606.ENSP00000381607,9606.ENSP00000418770,…	GSR,APOE,PRDX1,PRDX5,SOD1,FABP1,PRDX3,NQO1,PRDX6,PTGS1,MGST3,GSTO1,TXN,HBE1,SOD3,GPX2,MGST1,GSTP1,PARK7,GSTK1,TXNRD1,FAM213A
GO:0048013	Ephrin receptor signaling pathway	21	86	0.41	0.0043	9606.ENSP00000219070,9606.ENSP00000228825,9606.ENSP00000262942,9606.ENSP00000263238,9606.ENSP00000292807,9606.ENSP00000294742,9606.ENSP00000294785,9606.ENSP00000300574,9606.ENSP00000317985,9606.ENSP00000327694,9606.ENSP00000341189,9606.ENSP00000348461,9606.ENSP00000362680,9606.ENSP00000367220,9606.ENSP00000382697,9606.ENSP00000383118,9606.ENSP00000388169,9606.ENSP00000400175,9606.ENSP00000458162,…	MMP2,ARPC3,ARPC1A,ACTR3,AP2M1,ARPC5,NCSTN,CRK,ROCK2,AP2A2,PTK2,RAC1,SRC,ACTR2,ROCK1,CDC42,ARPC4,RHOA,ACTG1,YES1,AP2B1
GO:1901879	Regulation of protein depolymerization	21	87	0.41	0.0048	9606.ENSP00000248444,9606.ENSP00000259365,9606.ENSP00000263168,9606.ENSP00000263867,9606.ENSP00000264758,9606.ENSP00000296755,9606.ENSP00000300231,9606.ENSP00000303908,9606.ENSP00000308753,9606.ENSP00000348381,9606.ENSP00000349259,9606.ENSP00000350018,9606.ENSP00000356257,9606.ENSP00000357129,9606.ENSP00000361824,9606.ENSP00000362924,9606.ENSP00000378400,9606.ENSP00000401010,9606.ENSP00000432660,…	VIL1,TMOD1,CAPZA1,CAPG,ADD1,MAP1B,MAP1A,TWF2,TMOD3,ADD3,SPTBN1,SH3BP1,LMOD1,SPTA1,SPTAN1,GSN,LIMA1,CAPZB,CFL1,TWF1,SPTB
GO:0006826	Iron ion transport	17	71	0.41	0.0163	9606.ENSP00000232003,9606.ENSP00000253413,9606.ENSP00000273398,9606.ENSP00000276390,9606.ENSP00000290949,9606.ENSP00000316905,9606.ENSP00000333547,9606.ENSP00000352522,9606.ENSP00000352779,9606.ENSP00000353224,9606.ENSP00000363162,9606.ENSP00000366525,9606.ENSP00000373905,9606.ENSP00000385834,9606.ENSP00000429301,9606.ENSP00000452780,9606.ENSP00000479606	HRG,ATP6V1E1,ATP6V1A,ATP6V1B2,ATP6V0D1,SFXN1,RAB11B,ATP6V1H,SLC39A14,TFRC,ATP6V1G1,FTL,DNM2,TF,PGRMC2,B2M,CLTC
GO:1903078	Positive regulation of protein localization to plasma membrane	15	62	0.41	0.0265	9606.ENSP00000248444,9606.ENSP00000254301,9606.ENSP00000298316,9606.ENSP00000307078,9606.ENSP00000317714,9606.ENSP00000336831,9606.ENSP00000349259,9606.ENSP00000350012,9606.ENSP00000350310,9606.ENSP00000356042,9606.ENSP00000360293,9606.ENSP00000374455,9606.ENSP00000379350,9606.ENSP00000391490,9606.ENSP00000426909	VIL1,LGALS3,ARF6,KIF5B,STX4,PLS1,SPTBN1,ACSL3,ATP2B4,EZR,SORBS1,SQSTM1,ITGB1,AGR2,GNB2L1
GO:0051649	Establishment of localization in cell	559	2375	0.4	1.31e-81	9606.ENSP00000000412,9606.ENSP00000054666,9606.ENSP00000161559,9606.ENSP00000199764,9606.ENSP00000215375,9606.ENSP00000215570,9606.ENSP00000215754,9606.ENSP00000215829,9606.ENSP00000215832,9606.ENSP00000216034,9606.ENSP00000216181,9606.ENSP00000216336,9606.ENSP00000217971,9606.ENSP00000219022,9606.ENSP00000219169,9606.ENSP00000219313,9606.ENSP00000220166,9606.ENSP00000220325,9606.ENSP00000221418,…	M6PR,VAMP3,CEACAM1,CEACAM6,ATP5D,TIMM13,MIF,SNRPD3,MAPK1,TOMM22,MYH9,CTSG,PGRMC1,OLFM4,NUTF2,PSMD7,CTSH,EHD4,ECH1,SGTA,RPL18A,PDAP1,FIS1,PSMA2,SEC61B,RPL19,GOSR1,ALDOC,NFKB1,CTSC,MLEC,LTA4H,RAB35,SRSF9,MAPK14,RPS12,SNX3,HRG,CTSD,APOA1,CPSF3,VPS4B,TFG,CD97,SRSF6,NUP85,THOC2,C3,CANX,PYCARD,TUBA4A,PMPCB,COPB1,AP1M2,CORO7,RPS16,TSG101,APOE,XPO7,ACLY,VPS25,PPFIA1,LGALS3,NUP210,ARF3,DYNC1LI2,CAB39,COG3…
GO:0002252	Immune effector process	229	969	0.4	4.45e-30	9606.ENSP00000027335,9606.ENSP00000161559,9606.ENSP00000199764,9606.ENSP00000215754,9606.ENSP00000215832,9606.ENSP00000215909,9606.ENSP00000216336,9606.ENSP00000217971,9606.ENSP00000219022,9606.ENSP00000219313,9606.ENSP00000220166,9606.ENSP00000222968,9606.ENSP00000223321,9606.ENSP00000223642,9606.ENSP00000224181,9606.ENSP00000225698,9606.ENSP00000226253,9606.ENSP00000226574,9606.ENSP00000227266,…	CDH17,CEACAM1,CEACAM6,MIF,MAPK1,LGALS1,CTSG,PGRMC1,OLFM4,PSMD7,CTSH,PDAP1,PSMA2,C5,C8G,C1QBP,ALDOC,NFKB1,CTSC,MLEC,LTA4H,ARPC3,MAPK14,MSH2,MSH6,CTSD,ZC3HAV1,CD97,C3,PYCARD,COPB1,ACLY,LGALS3,CRP,CFHR5,CAB39,PSMB7,GGH,DNAJC13,ITGAV,HEXB,PSMD11,FAF2,PSMB1,COTL1,ERP44,PRDX1,SAMHD1,ARPC1A,MAPK3,ACTR3,AGA,PSMD3,RAB10,RAB7A,C1RL,SRP14,PML,IQGAP1,PFKL,PSMA5,DYNC1LI1,LAMTOR1,APP,STOM,CCT8,KPNB1,PDXK,CSTB,…
GO:0019752	Carboxylic acid metabolic process	203	853	0.4	8.36e-27	9606.ENSP00000011292,9606.ENSP00000052754,9606.ENSP00000168216,9606.ENSP00000205402,9606.ENSP00000215754,9606.ENSP00000216254,9606.ENSP00000216605,9606.ENSP00000216780,9606.ENSP00000216951,9606.ENSP00000217426,9606.ENSP00000217901,9606.ENSP00000220764,9606.ENSP00000220966,9606.ENSP00000221418,9606.ENSP00000222572,9606.ENSP00000223029,9606.ENSP00000223127,9606.ENSP00000226253,9606.ENSP00000228740,…	CPA1,DCN,HSD17B10,DLD,MIF,ACO2,MTHFD1,PCK2,GSS,AHCY,IDH3G,DECR1,PYCRL,ECH1,PON2,AIMP2,PLOD3,ALDOC,LTA4H,GAPDH,TPI1,CMAS,GCLC,MAPK14,ENO1,SARS,ATIC,ACADS,PTGIS,PEPD,GOT2,C3,ALDH1A2,ACSS2,ACLY,HRSP12,MRPS36,NARS,GGH,HEXB,AARS,PTPLAD1,MARS,MAPK3,ILVBL,OSBP,DARS,CAD,SDHA,VCAN,VDAC1,HIBADH,MCCC1,CPT1A,ACAT1,SORD,HEXA,PFKL,ITIH1,ENOPH1,GLUD1,HSD17B12,DLAT,QDPR,FARSB,DDAH1,ACAA2,ACSM3,HK2,ACOX1,PCBD1,ID…
GO:0062197	Cellular response to chemical stress	70	293	0.4	4.17e-09	9606.ENSP00000012443,9606.ENSP00000215832,9606.ENSP00000216714,9606.ENSP00000219070,9606.ENSP00000221130,9606.ENSP00000225174,9606.ENSP00000228251,9606.ENSP00000256383,9606.ENSP00000258418,9606.ENSP00000262746,9606.ENSP00000263025,9606.ENSP00000265462,9606.ENSP00000267257,9606.ENSP00000268058,9606.ENSP00000270142,9606.ENSP00000273258,9606.ENSP00000278572,9606.ENSP00000287295,9606.ENSP00000295834,…	PPP5C,MAPK1,APEX1,MMP2,GSR,PPIF,YBX3,EIF2S1,CAB39,PRDX1,MAPK3,PRDX5,PXN,PML,SOD1,ARL6IP5,RPS3,AIFM1,FABP1,PRDX3,CRK,CYCS,HNRNPD,STX4,PRKRA,NQO1,CAV1,PRDX6,PYCR2,PRKAA1,ATG7,STK39,TPM1,XRCC6,MYLK,LONP1,PARP1,NCF2,STAU1,NOX1,ADPRHL2,SRC,STK24,NUDT2,PCNA,AKR1C3,SOD3,DNM2,GPX2,XRCC5,PDCD10,DPEP1,NME1-NME2,SIN3A,CDK1,ERO1L,MGST1,CST3,GSTP1,DDX3X,PYCR1,DIABLO,PNPT1,SLC2A1,PARK7,HDAC2,TXNRD1,ATP2A2,SLC2…
GO:0031647	Regulation of protein stability	69	293	0.4	9.2e-09	9606.ENSP00000085068,9606.ENSP00000215832,9606.ENSP00000220166,9606.ENSP00000229239,9606.ENSP00000236850,9606.ENSP00000240185,9606.ENSP00000246117,9606.ENSP00000247470,9606.ENSP00000254436,9606.ENSP00000256078,9606.ENSP00000258091,9606.ENSP00000258654,9606.ENSP00000262375,9606.ENSP00000268058,9606.ENSP00000275603,9606.ENSP00000280326,9606.ENSP00000286371,9606.ENSP00000286788,9606.ENSP00000295688,…	ISOC2,MAPK1,CTSH,GAPDH,APOA1,TARDBP,NCLN,PYCARD,TRIM21,KRAS,CCT7,COG3,DNAJA3,PML,CCT6A,CCT5,ATP1B3,CCT8,CCT3,NAA15,VPS35,CCT2,HCFC1,CCAR2,PRKDC,USP9X,TCP1,PRKRA,CALR,CRTAP,HIST1H1B,LAMP1,HSP90AA1,RPS7,USP7,GTPBP4,ATP1B1,APOA2,LMNA,BAG3,FLNA,RPL5,BAG2,HSP90AB1,CTSA,STK4,SRC,GSN,STX12,RPL11,BAG6,FLOT1,SUGT1,HSPD1,PDCD10,GIPC1,CCT4,ZNF207,CTNND1,HYPK,TF,LAMP2,PARK7,RPL23,HSPA8,CRYAB,PHB2,PHB,SH3GLB1
GO:0016579	Protein deubiquitination	66	281	0.4	2.36e-08	9606.ENSP00000044462,9606.ENSP00000157812,9606.ENSP00000210313,9606.ENSP00000215071,9606.ENSP00000216455,9606.ENSP00000216802,9606.ENSP00000217958,9606.ENSP00000219313,9606.ENSP00000223321,9606.ENSP00000229268,9606.ENSP00000230085,9606.ENSP00000259457,9606.ENSP00000261303,9606.ENSP00000261479,9606.ENSP00000261601,9606.ENSP00000261712,9606.ENSP00000262193,9606.ENSP00000263202,9606.ENSP00000264639,…	PSMA4,PSMC4,PSMD5,PSMD8,PSMA3,PSME2,PSMD10,PSMD7,PSMA2,USP5,SNX3,PSMB7,PSMC1,PSMA6,USP14,PSMD11,PSMB1,UFD1L,PSMD3,PSMA5,RPS27A,UCHL1,PSMB4,PSME3,PSMD1,HCFC1,PSMD2,PSMC5,USP39,USP9X,RUVBL1,HGS,SHMT2,PSMF1,USP7,PSMD12,COPS5,RAD23B,PSMB10,VCP,PSMB5,UCHL5,PSMD4,BRCC3,PSMA7,PSMB2,PSMB9,PSMB8,STAM,UCHL3,PSME1,CDK1,PSMD14,UBA52,PSMC2,PSMD13,RHOA,PSMC6,PSMD6,EIF3F,PSMD9,OTUB1,USP10,ADRM1,PSMC3,PSMB3
GO:0046395	Carboxylic acid catabolic process	62	260	0.4	4.55e-08	9606.ENSP00000168216,9606.ENSP00000205402,9606.ENSP00000216780,9606.ENSP00000217426,9606.ENSP00000220764,9606.ENSP00000221418,9606.ENSP00000242592,9606.ENSP00000245206,9606.ENSP00000254878,9606.ENSP00000261416,9606.ENSP00000263383,9606.ENSP00000265395,9606.ENSP00000265594,9606.ENSP00000265641,9606.ENSP00000265838,9606.ENSP00000267814,9606.ENSP00000268097,9606.ENSP00000277865,9606.ENSP00000281243,…	HSD17B10,DLD,PCK2,AHCY,DECR1,ECH1,ACADS,GOT2,HRSP12,HEXB,ILVBL,HIBADH,MCCC1,CPT1A,ACAT1,SORD,HEXA,GLUD1,QDPR,DDAH1,ACAA2,ACOX1,PCBD1,ECI1,DCXR,GLS,SHMT1,BCAT2,HADHB,ACAA1,SHMT2,MCCC2,ETFB,HIBCH,ACAT2,ECHS1,OAT,ACADSB,DBT,ABCD3,CPT2,SCP2,AKR1A1,HMGCL,ALDH4A1,PCCA,AMACR,QPRT,MPST,FAH,TST,ALDH7A1,PCYOX1,CD44,IVD,PCCB,HSD17B4,GNPDA1,ECHDC1,ALDH6A1,ETFA,HADH
GO:0031503	Protein-containing complex localization	61	257	0.4	6.97e-08	9606.ENSP00000001008,9606.ENSP00000229390,9606.ENSP00000238112,9606.ENSP00000244020,9606.ENSP00000245544,9606.ENSP00000245838,9606.ENSP00000254508,9606.ENSP00000258962,9606.ENSP00000260746,9606.ENSP00000261396,9606.ENSP00000269349,9606.ENSP00000283179,9606.ENSP00000283195,9606.ENSP00000285968,9606.ENSP00000288071,9606.ENSP00000291552,9606.ENSP00000296577,9606.ENSP00000296930,9606.ENSP00000299138,…	FKBP4,SRSF9,CPSF3,SRSF6,NUP85,THOC2,NUP210,SRSF1,ARL3,NUP133,EIF4A3,HNRNPU,RANBP2,NUP205,DDX19B,U2AFBP,ABCE1,NPM1,VPS35,RAB8A,DDX19A,KIF5B,U2AF2,NUP93,RRS1,SRSF7,SRRM1,XPOT,EIF5A,TNPO1,SARNP,HNRNPA2B1,AP3D1,SCRIB,SFPQ,EZR,TPR,SRSF11,MAGOH,SRSF3,EIF6,NCBP1,RCC2,NUP160,SEC13,DNM2,SRSF2,DYNLL1,RAE1,DDX39B,XPO1,SSB,ALYREF,RAN,RNPS1,RBM8A,UPF1,NUP62,DYNLL2,AP2B1,CPSF1
GO:0034599	Cellular response to oxidative stress	58	244	0.4	1.62e-07	9606.ENSP00000012443,9606.ENSP00000215832,9606.ENSP00000216714,9606.ENSP00000219070,9606.ENSP00000221130,9606.ENSP00000225174,9606.ENSP00000256383,9606.ENSP00000262746,9606.ENSP00000263025,9606.ENSP00000265462,9606.ENSP00000267257,9606.ENSP00000268058,9606.ENSP00000270142,9606.ENSP00000273258,9606.ENSP00000278572,9606.ENSP00000287295,9606.ENSP00000295834,9606.ENSP00000298510,9606.ENSP00000300574,…	PPP5C,MAPK1,APEX1,MMP2,GSR,PPIF,EIF2S1,PRDX1,MAPK3,PRDX5,PXN,PML,SOD1,ARL6IP5,RPS3,AIFM1,FABP1,PRDX3,CRK,CYCS,HNRNPD,STX4,PRKRA,NQO1,PRDX6,PYCR2,PRKAA1,TPM1,LONP1,PARP1,NCF2,STAU1,ADPRHL2,SRC,STK24,NUDT2,PCNA,AKR1C3,SOD3,DNM2,GPX2,PDCD10,DPEP1,NME1-NME2,SIN3A,CDK1,ERO1L,MGST1,CST3,GSTP1,PYCR1,DIABLO,PNPT1,PARK7,HDAC2,TXNRD1,ATP2A2,SLC25A24
GO:0043903	Regulation of symbiotic process	55	230	0.4	3.22e-07	9606.ENSP00000215909,9606.ENSP00000229239,9606.ENSP00000230085,9606.ENSP00000238497,9606.ENSP00000240185,9606.ENSP00000242351,9606.ENSP00000251968,9606.ENSP00000252486,9606.ENSP00000253024,9606.ENSP00000254436,9606.ENSP00000255030,9606.ENSP00000261023,9606.ENSP00000261531,9606.ENSP00000261875,9606.ENSP00000265062,9606.ENSP00000268058,9606.ENSP00000286713,9606.ENSP00000301764,9606.ENSP00000303754,…	LGALS1,GAPDH,SNX3,VPS4B,TARDBP,ZC3HAV1,TSG101,APOE,TRIM28,TRIM21,CRP,ITGAV,SNW1,PTPLAD1,RAB7A,PML,STOM,DDB1,PPID,PPIH,PDE12,BANF1,PABPC1,TRIM25,FBLN1,LARP1,CAV1,VAPA,HLA-DRB1,STAT1,DHX9,IFI16,ADAR,FMR1,STAU1,HDAC1,KPNA6,GSN,SRPK1,POLR2B,LGALS9,IFITM3,DDX3X,IFITM1,TOP2B,ILF3,TOP2A,POLR2H,VAPB,PPIA,HSPA8,CFL1,PHB,POLR2A,PSMC3
GO:0030833	Regulation of actin filament polymerization	41	173	0.4	2.28e-05	9606.ENSP00000228825,9606.ENSP00000245932,9606.ENSP00000247470,9606.ENSP00000248444,9606.ENSP00000259365,9606.ENSP00000262215,9606.ENSP00000262428,9606.ENSP00000262942,9606.ENSP00000263168,9606.ENSP00000263238,9606.ENSP00000263867,9606.ENSP00000264758,9606.ENSP00000292385,9606.ENSP00000294742,9606.ENSP00000298316,9606.ENSP00000303908,9606.ENSP00000308753,9606.ENSP00000320176,9606.ENSP00000348381,…	ARPC3,VASP,PYCARD,VIL1,TMOD1,ARFGEF1,COTL1,ARPC1A,CAPZA1,ACTR3,CAPG,ADD1,DBN1,ARPC5,ARF6,TWF2,TMOD3,HCLS1,ADD3,SPTBN1,GMFB,MYO1C,LMOD1,SPTA1,ARHGAP18,SPTAN1,GSN,CTTN,ACTR2,GRB2,CORO1B,CTNNA2,ARPC4,ARFIP1,RHOA,CAPZB,DBNL,FAM49B,TWF1,SPTB,WASF2
GO:0034504	Protein localization to nucleus	39	165	0.4	4.18e-05	9606.ENSP00000219169,9606.ENSP00000245544,9606.ENSP00000261183,9606.ENSP00000261396,9606.ENSP00000261574,9606.ENSP00000261667,9606.ENSP00000262982,9606.ENSP00000264335,9606.ENSP00000265388,9606.ENSP00000268058,9606.ENSP00000283179,9606.ENSP00000283195,9606.ENSP00000288266,9606.ENSP00000290158,9606.ENSP00000310668,9606.ENSP00000320866,9606.ENSP00000322396,9606.ENSP00000334373,9606.ENSP00000336712,…	NUTF2,NUP85,OSBPL8,NUP133,IPO5,KPNA3,CSE1L,YWHAE,TNPO3,PML,HNRNPU,RANBP2,APPL1,KPNB1,NUP93,CALR,RRS1,KPNA4,TNPO1,IPO4,IPO9,TPR,LMNA,ADAR,KPNA6,TXN,RPL11,IPO7,SUN1,XPO1,ELAVL1,RANGAP1,PARK7,CDK5,RPL23,PLRG1,PHB2,RAN,NUP62
GO:0032392	DNA geometric change	27	114	0.4	0.0011	9606.ENSP00000254719,9606.ENSP00000262105,9606.ENSP00000264156,9606.ENSP00000265056,9606.ENSP00000272317,9606.ENSP00000296503,9606.ENSP00000301764,9606.ENSP00000307288,9606.ENSP00000318297,9606.ENSP00000325863,9606.ENSP00000345347,9606.ENSP00000346694,9606.ENSP00000349508,9606.ENSP00000350708,9606.ENSP00000352257,9606.ENSP00000355759,9606.ENSP00000356520,9606.ENSP00000359393,9606.ENSP00000368100,…	RPA1,MCM4,MCM6,MCM2,RPS27A,HMGB2,DDB1,MCM7,RUVBL1,MRE11A,HMGB1,HNRNPA2B1,CHD4,RAD23B,XRCC6,PARP1,DHX9,HMGB3,RAD50,DDX1,XRCC5,G3BP1,DDX3X,UBA52,RECQL,SSBP1,RUVBL2
GO:0033108	Mitochondrial respiratory chain complex assembly	24	102	0.4	0.0028	9606.ENSP00000184266,9606.ENSP00000252711,9606.ENSP00000263774,9606.ENSP00000268668,9606.ENSP00000287295,9606.ENSP00000296597,9606.ENSP00000299166,9606.ENSP00000312618,9606.ENSP00000315774,9606.ENSP00000322450,9606.ENSP00000327268,9606.ENSP00000330737,9606.ENSP00000345445,9606.ENSP00000354762,9606.ENSP00000354961,9606.ENSP00000362060,9606.ENSP00000362873,9606.ENSP00000389160,9606.ENSP00000392709,…	NDUFB4,NDUFA10,NDUFS3,NDUFB10,AIFM1,NDUFAF2,NDUFB8,ACAD9,NDUFS8,NDUFV1,NDUFV2,NDUFA12,SAMM50,COA3,MT-ND4,NDUFS5,NDUFA8,NDUFA11,NDUFS1,NDUFA5,TFAM,NDUFA13,UQCRB,NDUFAB1
GO:1903321	Negative regulation of protein modification by small protein conjugation or removal	21	88	0.4	0.0054	9606.ENSP00000229416,9606.ENSP00000254436,9606.ENSP00000278572,9606.ENSP00000296161,9606.ENSP00000307863,9606.ENSP00000339095,9606.ENSP00000339191,9606.ENSP00000344456,9606.ENSP00000354040,9606.ENSP00000358283,9606.ENSP00000359345,9606.ENSP00000359727,9606.ENSP00000363676,9606.ENSP00000366565,9606.ENSP00000369127,9606.ENSP00000374455,9606.ENSP00000380460,9606.ENSP00000418770,9606.ENSP00000419782,…	GCLC,TRIM21,RPS3,DTX3L,U2AF2,RPS7,CAV1,CTNNB1,GTPBP4,UFL1,RPL5,BAG2,RPL11,VPS28,DNAJA1,SQSTM1,PLAA,PARK7,CDK5,RPL23,OTUB1
GO:0043154	Negative regulation of cysteine-type endopeptidase activity involved in apoptotic process	20	85	0.4	0.0083	9606.ENSP00000217244,9606.ENSP00000248444,9606.ENSP00000256644,9606.ENSP00000262375,9606.ENSP00000264335,9606.ENSP00000265462,9606.ENSP00000295834,9606.ENSP00000298510,9606.ENSP00000306788,9606.ENSP00000314067,9606.ENSP00000340989,9606.ENSP00000362680,9606.ENSP00000368884,9606.ENSP00000376807,9606.ENSP00000382840,9606.ENSP00000398632,9606.ENSP00000418770,9606.ENSP00000419970,9606.ENSP00000433560,…	CSNK2A1,VIL1,LAMTOR5,DNAJA3,YWHAE,PRDX5,FABP1,PRDX3,ARL6IP1,PAK2,SFN,SRC,RPS6KA3,DPEP1,DDX3X,CD44,PARK7,POR,CRYAB,RPS6KA1
GO:1903747	Regulation of establishment of protein localization to mitochondrion	18	76	0.4	0.0135	9606.ENSP00000249071,9606.ENSP00000264335,9606.ENSP00000270225,9606.ENSP00000306330,9606.ENSP00000318822,9606.ENSP00000320324,9606.ENSP00000340648,9606.ENSP00000340989,9606.ENSP00000346148,9606.ENSP00000349722,9606.ENSP00000358081,9606.ENSP00000361930,9606.ENSP00000369127,9606.ENSP00000379287,9606.ENSP00000400906,9606.ENSP00000466214,9606.ENSP00000468424,9606.ENSP00000479919	RAC2,YWHAE,SAE1,YWHAG,BID,NPEPPS,HUWE1,SFN,PRKAA1,UBE2D3,BAG3,YWHAB,DNAJA1,YWHAZ,UBE2L3,PDCD5,NMT1,SH3GLB1
GO:0048857	Neural nucleus development	15	64	0.4	0.0334	9606.ENSP00000246554,9606.ENSP00000263774,9606.ENSP00000264335,9606.ENSP00000277865,9606.ENSP00000291295,9606.ENSP00000349486,9606.ENSP00000358737,9606.ENSP00000358865,9606.ENSP00000376297,9606.ENSP00000377470,9606.ENSP00000383118,9606.ENSP00000389649,9606.ENSP00000400175,9606.ENSP00000428564,9606.ENSP00000445175	COX6B1,NDUFS3,YWHAE,GLUD1,CALM3,SCRIB,ATP5F1,INA,DYNLL1,CNP,CDC42,ATP5J,RHOA,SEC24B,LDHA
GO:0043388	Positive regulation of dna binding	14	59	0.4	0.0398	9606.ENSP00000224073,9606.ENSP00000253024,9606.ENSP00000256644,9606.ENSP00000291295,9606.ENSP00000296503,9606.ENSP00000296585,9606.ENSP00000337060,9606.ENSP00000344456,9606.ENSP00000345347,9606.ENSP00000346483,9606.ENSP00000355759,9606.ENSP00000362409,9606.ENSP00000363641,9606.ENSP00000418770	EDF1,TRIM28,LAMTOR5,CALM3,HMGB2,ITGA2,NME1,CTNNB1,HMGB1,DDRGK1,PARP1,FAM129B,TXN,PARK7
GO:0034613	Cellular protein localization	376	1610	0.39	1.23e-50	9606.ENSP00000000412,9606.ENSP00000054666,9606.ENSP00000070846,9606.ENSP00000215570,9606.ENSP00000216034,9606.ENSP00000219169,9606.ENSP00000220325,9606.ENSP00000221418,9606.ENSP00000221566,9606.ENSP00000222247,9606.ENSP00000223136,9606.ENSP00000223641,9606.ENSP00000225430,9606.ENSP00000227524,9606.ENSP00000229340,9606.ENSP00000229390,9606.ENSP00000230050,9606.ENSP00000233146,9606.ENSP00000234160,…	M6PR,VAMP3,PKP2,TIMM13,TOMM22,NUTF2,EHD4,ECH1,SGTA,RPL18A,FIS1,SEC61B,RPL19,PRPF19,RAB35,SRSF9,RPS12,MSH2,GORASP2,CPSF3,SRSF6,NUP85,THOC2,PMPCB,COPB1,AP1M2,RPS16,APOE,XPO7,VPS25,NUP210,RPA1,LAMTOR5,ARF3,COG3,SRSF1,RPL35,ARL3,OSBPL8,NUP133,IPO5,ARL1,KPNA3,ERP29,CDH1,SNX1,FAF2,TRAM1,DNAJA3,RPL8,SLC9A3R1,RAB2A,CSE1L,UFD1L,PACSIN2,EHD2,NAPA,SPCS2,ARCN1,AGPS,YWHAE,RAB10,SEPT11,PDCD6,GRPEL1,RAB7A,XPO5,…
GO:0065003	Protein-containing complex assembly	300	1293	0.39	5.97e-39	9606.ENSP00000001008,9606.ENSP00000054666,9606.ENSP00000168216,9606.ENSP00000184266,9606.ENSP00000210313,9606.ENSP00000215375,9606.ENSP00000215754,9606.ENSP00000215793,9606.ENSP00000215829,9606.ENSP00000216190,9606.ENSP00000216218,9606.ENSP00000216554,9606.ENSP00000217958,9606.ENSP00000220325,9606.ENSP00000220592,9606.ENSP00000220849,9606.ENSP00000223029,9606.ENSP00000227266,9606.ENSP00000227524,…	FKBP4,VAMP3,HSD17B10,NDUFB4,PSMD5,ATP5D,MIF,SF3A1,SNRPD3,EIF3D,ST13,EIF5,PSMD10,EHD4,AGO2,EIF3E,AIMP2,CTSC,PRPF19,APOC3,SART3,SRSF9,WDR77,APOA1,TFG,SRSF6,HIST1H4F,MRPS7,VASP,PYCARD,EIF3K,VIL1,ALDH1A2,CORO7,APOE,NDUFA10,EIF2S3,EIF3G,GRWD1,FUS,NUP210,RPA1,NASP,LAMC1,SRSF1,KIAA0368,UBE2K,KPNA3,PSMD11,EIF3J,MCM4,TCEB2,SLC9A3R1,SAMHD1,MAPK3,CAPZA1,NAPA,NDUFS3,CAPG,HAT1,MCM6,DARS,PDCD6,MCM2,PRPF6,CPSF6…
GO:0032940	Secretion by cell	228	979	0.39	3.71e-29	9606.ENSP00000000412,9606.ENSP00000005257,9606.ENSP00000054666,9606.ENSP00000161559,9606.ENSP00000199764,9606.ENSP00000215754,9606.ENSP00000215832,9606.ENSP00000216181,9606.ENSP00000216336,9606.ENSP00000217971,9606.ENSP00000219022,9606.ENSP00000219313,9606.ENSP00000220166,9606.ENSP00000222968,9606.ENSP00000223321,9606.ENSP00000225777,9606.ENSP00000226253,9606.ENSP00000226574,9606.ENSP00000227266,…	M6PR,RALA,VAMP3,CEACAM1,CEACAM6,MIF,MAPK1,MYH9,CTSG,PGRMC1,OLFM4,PSMD7,CTSH,PDAP1,PSMA2,SYNGR2,ALDOC,NFKB1,CTSC,MLEC,LTA4H,MAPK14,HRG,CTSD,APOA1,CD97,C3,CANX,PYCARD,TUBA4A,COPB1,TSG101,ACLY,PPFIA1,LGALS3,CAB39,PSMB7,GGH,DNAJC13,ITGAV,HEXB,PSMD11,ERP29,FAF2,PSMB1,ARFGEF1,COTL1,ERP44,LGALS3BP,NAPA,AGA,PSMD3,RAB10,KNG1,RAB7A,SRP14,IQGAP1,PFKL,SOD1,PSMA5,DYNC1LI1,LIN7C,LAMTOR1,FERMT3,OLA1,APP,PDIA4,S…
GO:0031329	Regulation of cellular catabolic process	201	875	0.39	6.41e-25	9606.ENSP00000037243,9606.ENSP00000044462,9606.ENSP00000052754,9606.ENSP00000157812,9606.ENSP00000179259,9606.ENSP00000210313,9606.ENSP00000215071,9606.ENSP00000216044,9606.ENSP00000216455,9606.ENSP00000216714,9606.ENSP00000216802,9606.ENSP00000217244,9606.ENSP00000217958,9606.ENSP00000219313,9606.ENSP00000220592,9606.ENSP00000221566,9606.ENSP00000223321,9606.ENSP00000227266,9606.ENSP00000227667,…	GABARAPL2,PSMA4,DCN,PSMC4,C12orf5,PSMD5,PSMD8,GTPBP1,PSMA3,APEX1,PSME2,CSNK2A1,PSMD10,PSMD7,AGO2,SGTA,PSMA2,CTSC,APOC3,YBX3,GAPDH,USP5,GCLC,MAPK14,APOA1,TARDBP,ZC3HAV1,CAPNS1,PYCARD,APOE,ATP6V1E1,FUS,TRIM21,HRSP12,LAMTOR5,TBRG4,PSMB7,LRPPRC,PSMC1,UBE2K,PSMA6,USP14,PSMD11,PSMB1,MAPK3,PSMD3,NSUN2,VDAC1,CPT1A,PML,PSMA5,RPS27A,RALB,RAB5A,ATP6V1A,CISD2,ATP6V1B2,LAMTOR1,HSPB8,HNRNPU,UCHL1,APP,AIFM1,PSM…
GO:0044282	Small molecule catabolic process	97	424	0.39	1.17e-11	9606.ENSP00000168216,9606.ENSP00000196371,9606.ENSP00000205402,9606.ENSP00000216780,9606.ENSP00000217426,9606.ENSP00000220764,9606.ENSP00000221418,9606.ENSP00000226253,9606.ENSP00000229239,9606.ENSP00000229270,9606.ENSP00000234590,9606.ENSP00000242592,9606.ENSP00000245206,9606.ENSP00000245552,9606.ENSP00000252486,9606.ENSP00000254878,9606.ENSP00000261416,9606.ENSP00000261733,9606.ENSP00000263383,…	HSD17B10,OXCT1,DLD,PCK2,AHCY,DECR1,ECH1,ALDOC,GAPDH,TPI1,ENO1,ACADS,GOT2,NT5C,APOE,HRSP12,HEXB,ALDH2,ILVBL,HIBADH,MCCC1,CPT1A,ACAT1,SORD,HEXA,PFKL,GLUD1,QDPR,DDAH1,ACAA2,HK2,ACOX1,HPRT1,PCBD1,ECI1,DCXR,GLB1,GPD2,SULT1B1,ADPGK,GLS,SHMT1,PKM,BCAT2,HADHB,ACAA1,SHMT2,MCCC2,ETFB,RPE,AKR1B10,HIBCH,PNP,ACAT2,ECHS1,OAT,ACADSB,DBT,ABCD3,CPT2,SCP2,AKR1A1,PGK1,HMGCL,ALDH4A1,PCCA,ALDH1B1,ESD,AKR1C3,PGM2,AMAC…
GO:0002764	Immune response-regulating signaling pathway	81	349	0.39	5.46e-10	9606.ENSP00000044462,9606.ENSP00000157812,9606.ENSP00000210313,9606.ENSP00000215071,9606.ENSP00000215832,9606.ENSP00000216455,9606.ENSP00000216802,9606.ENSP00000217958,9606.ENSP00000219313,9606.ENSP00000220003,9606.ENSP00000220166,9606.ENSP00000223321,9606.ENSP00000226279,9606.ENSP00000226574,9606.ENSP00000228825,9606.ENSP00000256078,9606.ENSP00000259457,9606.ENSP00000261303,9606.ENSP00000261479,…	PSMA4,PSMC4,PSMD5,PSMD8,MAPK1,PSMA3,PSME2,PSMD10,PSMD7,CSK,CTSH,PSMA2,CD38,NFKB1,ARPC3,KRAS,PSMB7,PSMC1,PSMA6,PSMD11,PSMB1,ARPC1A,MAPK3,ACTR3,PSMD3,PSMA5,PSMB4,CALM3,PSME3,ARPC5,CRK,PSMD1,PSMD2,PSMC5,KHDRBS1,PAK2,UBE2N,RFTN1,HSP90AA1,PSMF1,PTK2,CRKL,PSMD12,RAC1,STOML2,PIGR,PSMB10,MYO1C,HLA-DRB1,PSMB5,PSMD4,PSMA7,HSP90AB1,PSMB2,SRC,PSMB9,PSMB8,BAG6,ABI1,ACTR2,PSME1,GRB2,HLA-DRA,HLA-A,CDC42,PSMD14,…
GO:0002768	Immune response-regulating cell surface receptor signaling pathway	80	346	0.39	8.35e-10	9606.ENSP00000044462,9606.ENSP00000157812,9606.ENSP00000210313,9606.ENSP00000215071,9606.ENSP00000215832,9606.ENSP00000216455,9606.ENSP00000216802,9606.ENSP00000217958,9606.ENSP00000219313,9606.ENSP00000220003,9606.ENSP00000223321,9606.ENSP00000226279,9606.ENSP00000226574,9606.ENSP00000228825,9606.ENSP00000256078,9606.ENSP00000259457,9606.ENSP00000261303,9606.ENSP00000261479,9606.ENSP00000261712,…	PSMA4,PSMC4,PSMD5,PSMD8,MAPK1,PSMA3,PSME2,PSMD10,PSMD7,CSK,PSMA2,CD38,NFKB1,ARPC3,KRAS,PSMB7,PSMC1,PSMA6,PSMD11,PSMB1,ARPC1A,MAPK3,ACTR3,PSMD3,PSMA5,PSMB4,CALM3,PSME3,ARPC5,CRK,PSMD1,PSMD2,PSMC5,KHDRBS1,PAK2,UBE2N,RFTN1,HSP90AA1,PSMF1,PTK2,CRKL,PSMD12,RAC1,STOML2,PIGR,PSMB10,MYO1C,HLA-DRB1,PSMB5,PSMD4,PSMA7,HSP90AB1,PSMB2,SRC,PSMB9,PSMB8,BAG6,ABI1,ACTR2,PSME1,GRB2,HLA-DRA,HLA-A,CDC42,PSMD14,ARPC4…
GO:0031330	Negative regulation of cellular catabolic process	60	258	0.39	1.76e-07	9606.ENSP00000037243,9606.ENSP00000179259,9606.ENSP00000217244,9606.ENSP00000221566,9606.ENSP00000227667,9606.ENSP00000228251,9606.ENSP00000229795,9606.ENSP00000240185,9606.ENSP00000254108,9606.ENSP00000260665,9606.ENSP00000261601,9606.ENSP00000264670,9606.ENSP00000268058,9606.ENSP00000283179,9606.ENSP00000299138,9606.ENSP00000300231,9606.ENSP00000302768,9606.ENSP00000310670,9606.ENSP00000313007,…	GABARAPL2,C12orf5,CSNK2A1,SGTA,APOC3,YBX3,MAPK14,TARDBP,FUS,LRPPRC,USP14,NSUN2,PML,HNRNPU,VPS35,MAP1A,PAIP1,CCAR2,PABPC1,HNRNPD,HNRNPA0,CHMP4A,LARP1,PSMF1,RPS7,PTK2,USP7,ANXA2,ATG7,DDRGK1,THRAP3,ATP2B4,UCHL5,DHX9,DKC1,SYNCRIP,RPL5,FMR1,HSP90AB1,CTSA,YBX1,RPL11,BAG6,DFFA,GIPC1,CST3,ROCK1,ELAVL1,SCFD1,GOLGA2,EIF4G1,PARK7,RPL23,EIF4G2,CDK5RAP3,SLIRP,HNRNPC,APOC1,TAF15,POLDIP2
GO:0034976	Response to endoplasmic reticulum stress	59	256	0.39	3.02e-07	9606.ENSP00000221566,9606.ENSP00000223641,9606.ENSP00000225726,9606.ENSP00000234160,9606.ENSP00000240185,9606.ENSP00000247461,9606.ENSP00000256383,9606.ENSP00000259253,9606.ENSP00000259335,9606.ENSP00000261427,9606.ENSP00000261942,9606.ENSP00000262455,9606.ENSP00000263202,9606.ENSP00000264758,9606.ENSP00000268058,9606.ENSP00000276461,9606.ENSP00000286091,9606.ENSP00000287295,9606.ENSP00000290949,…	SGTA,SEC61B,CCDC47,GORASP2,TARDBP,CANX,EIF2S1,UGGT1,KIAA0368,UBE2K,FAF2,ERP44,UFD1L,ADD1,PML,ERLIN2,PDIA4,AIFM1,ATP6V0D1,STT3B,TPP1,HSP90B1,PDIA3,TBL2,EEF2,TLN1,CALR,TRIM25,NPLOC4,UBQLN2,DDRGK1,UBA5,GFPT1,VCP,DCTN1,FAM129A,HDGF,LMNA,UFL1,PTPN1,BAG6,FLOT1,UBQLN1,SEC31A,ERO1L,HM13,DDX3X,PSMC6,ERLIN1,EIF4G1,VAPB,SRPRB,TMEM33,CDK5RAP3,ATP2A2,ASNA1,DNAJC3,HYOU1,TMCO1
GO:0032388	Positive regulation of intracellular transport	52	223	0.39	1.51e-06	9606.ENSP00000215832,9606.ENSP00000219169,9606.ENSP00000223136,9606.ENSP00000229795,9606.ENSP00000240185,9606.ENSP00000249071,9606.ENSP00000253024,9606.ENSP00000261574,9606.ENSP00000261769,9606.ENSP00000263277,9606.ENSP00000264335,9606.ENSP00000266679,9606.ENSP00000270225,9606.ENSP00000286713,9606.ENSP00000306330,9606.ENSP00000307078,9606.ENSP00000313829,9606.ENSP00000318822,9606.ENSP00000320176,…	MAPK1,NUTF2,FIS1,MAPK14,TARDBP,RAC2,TRIM28,IPO5,CDH1,EHD2,YWHAE,CPSF6,SAE1,STOM,YWHAG,KIF5B,KHDRBS1,BID,HCLS1,NPEPPS,PPM1A,HUWE1,SFN,ANP32B,ANXA2,PRKAA1,UBE2D3,MYO1C,MSN,EZR,TPR,DHX9,BAG3,FLNA,SCP2,HSP90AB1,YWHAB,PDCD10,NUMA1,JUP,CDK1,YWHAZ,TM9SF4,CDC42,SAR1B,BCAP31,UBE2L3,CDK5,RAN,PDCD5,NMT1,SH3GLB1
GO:0005996	Monosaccharide metabolic process	46	198	0.39	8.78e-06	9606.ENSP00000215882,9606.ENSP00000216780,9606.ENSP00000225665,9606.ENSP00000226253,9606.ENSP00000229239,9606.ENSP00000229270,9606.ENSP00000229416,9606.ENSP00000229795,9606.ENSP00000234590,9606.ENSP00000245206,9606.ENSP00000265641,9606.ENSP00000267814,9606.ENSP00000269848,9606.ENSP00000280346,9606.ENSP00000290573,9606.ENSP00000297258,9606.ENSP00000303356,9606.ENSP00000306920,9606.ENSP00000307241,…	SLC25A1,PCK2,SLC25A11,ALDOC,GAPDH,TPI1,GCLC,MAPK14,ENO1,GOT2,CPT1A,SORD,PFKL,DLAT,HK2,FABP5,DCXR,GLB1,PDHB,GPD2,ADPGK,PKM,TALDO1,MDH2,CYB5A,PRKAA1,RPE,SLC39A14,GSTO1,AKR1A1,PGK1,FUCA1,POFUT1,PGM2,DAK,PGM5,SLC25A12,TKT,MAN2B1,SLC25A13,GPI,FBP1,SLC2A1,NUDT5,SLC25A10,GALE
GO:0010952	Positive regulation of peptidase activity	46	198	0.39	8.78e-06	9606.ENSP00000216802,9606.ENSP00000220166,9606.ENSP00000223061,9606.ENSP00000223136,9606.ENSP00000227266,9606.ENSP00000229795,9606.ENSP00000233893,9606.ENSP00000236671,9606.ENSP00000247470,9606.ENSP00000262375,9606.ENSP00000263025,9606.ENSP00000264933,9606.ENSP00000268058,9606.ENSP00000273258,9606.ENSP00000278572,9606.ENSP00000284981,9606.ENSP00000287295,9606.ENSP00000293362,9606.ENSP00000307786,…	PSME2,CTSH,PCOLCE,FIS1,CTSC,MAPK14,HSPE1,CTSD,PYCARD,DNAJA3,MAPK3,PDCD6,PML,ARL6IP5,RPS3,APP,AIFM1,PSME3,CYCS,ROCK2,BID,KARS,FBLN1,CAV1,HMGB1,ANP32B,DDRGK1,FN1,VCP,IFI16,GSN,PSME1,HSPD1,CLDN3,LGALS9,DDX3X,PSMD14,BCAP31,DIABLO,RHOA,FAM162A,NDUFA13,GNB2L1,CASP1,PDCD5,ADRM1
GO:0008064	Regulation of actin polymerization or depolymerization	44	189	0.39	1.45e-05	9606.ENSP00000228825,9606.ENSP00000245932,9606.ENSP00000247470,9606.ENSP00000248444,9606.ENSP00000259365,9606.ENSP00000262215,9606.ENSP00000262428,9606.ENSP00000262942,9606.ENSP00000263168,9606.ENSP00000263238,9606.ENSP00000263867,9606.ENSP00000264758,9606.ENSP00000292385,9606.ENSP00000294742,9606.ENSP00000298316,9606.ENSP00000303908,9606.ENSP00000308753,9606.ENSP00000320176,9606.ENSP00000348381,…	ARPC3,VASP,PYCARD,VIL1,TMOD1,ARFGEF1,COTL1,ARPC1A,CAPZA1,ACTR3,CAPG,ADD1,DBN1,ARPC5,ARF6,TWF2,TMOD3,HCLS1,ADD3,SPTBN1,SH3BP1,GMFB,MYO1C,LMOD1,SPTA1,ARHGAP18,SPTAN1,GSN,CTTN,ACTR2,GRB2,CORO1B,LIMA1,CTNNA2,ARPC4,ARFIP1,RHOA,CAPZB,DBNL,FAM49B,CFL1,TWF1,SPTB,WASF2
GO:0090316	Positive regulation of intracellular protein transport	43	184	0.39	1.76e-05	9606.ENSP00000215832,9606.ENSP00000219169,9606.ENSP00000223136,9606.ENSP00000229795,9606.ENSP00000240185,9606.ENSP00000249071,9606.ENSP00000253024,9606.ENSP00000261574,9606.ENSP00000261769,9606.ENSP00000264335,9606.ENSP00000270225,9606.ENSP00000286713,9606.ENSP00000306330,9606.ENSP00000307078,9606.ENSP00000318822,9606.ENSP00000320176,9606.ENSP00000320324,9606.ENSP00000327255,9606.ENSP00000340648,…	MAPK1,NUTF2,FIS1,MAPK14,TARDBP,RAC2,TRIM28,IPO5,CDH1,YWHAE,SAE1,STOM,YWHAG,KIF5B,BID,HCLS1,NPEPPS,PPM1A,HUWE1,SFN,ANP32B,PRKAA1,UBE2D3,MYO1C,TPR,BAG3,FLNA,HSP90AB1,YWHAB,PDCD10,JUP,CDK1,YWHAZ,TM9SF4,CDC42,SAR1B,BCAP31,UBE2L3,CDK5,RAN,PDCD5,NMT1,SH3GLB1
GO:0035966	Response to topologically incorrect protein	43	188	0.39	2.73e-05	9606.ENSP00000233893,9606.ENSP00000247461,9606.ENSP00000254322,9606.ENSP00000256383,9606.ENSP00000259253,9606.ENSP00000261942,9606.ENSP00000262455,9606.ENSP00000263202,9606.ENSP00000264758,9606.ENSP00000281938,9606.ENSP00000290949,9606.ENSP00000295770,9606.ENSP00000297185,9606.ENSP00000299427,9606.ENSP00000299767,9606.ENSP00000302961,9606.ENSP00000307260,9606.ENSP00000310111,9606.ENSP00000316029,…	HSPE1,CANX,DNAJB1,EIF2S1,UGGT1,FAF2,ERP44,UFD1L,ADD1,HSPB8,ATP6V0D1,STT3B,HSPA9,TPP1,HSP90B1,HSPA4,TBL2,HSPB7,TLN1,HSPH1,CALR,HSP90AA1,GFPT1,VCP,DCTN1,HDGF,LMNA,BAG3,HSP90AB1,PTPN1,BAG6,OPTN,DNAJA1,HSPD1,SEC31A,ERO1L,VAPB,SRPRB,HSPA8,CDK5RAP3,ASNA1,DNAJC3,HYOU1
GO:0016236	Macroautophagy	36	156	0.39	0.00015	9606.ENSP00000037243,9606.ENSP00000216034,9606.ENSP00000217244,9606.ENSP00000238497,9606.ENSP00000251968,9606.ENSP00000253794,9606.ENSP00000265062,9606.ENSP00000265333,9606.ENSP00000284320,9606.ENSP00000306015,9606.ENSP00000323867,9606.ENSP00000324205,9606.ENSP00000331201,9606.ENSP00000345195,9606.ENSP00000346148,9606.ENSP00000346437,9606.ENSP00000351777,9606.ENSP00000356602,9606.ENSP00000358081,…	GABARAPL2,TOMM22,CSNK2A1,VPS4B,TSG101,VPS25,RAB7A,VDAC1,TOMM70A,SYNPO2,PRKAG1,CHMP4A,HGS,UBQLN2,PRKAA1,ATG7,VCP,VTA1,BAG3,SRC,STX12,CSNK2B,UBQLN1,VPS28,STAM,SQSTM1,DYNLL1,PLAA,RAB1A,LAMP2,TOMM40,RAB23,NSFL1C,PGAM5,PHB2,DYNLL2
GO:0051494	Negative regulation of cytoskeleton organization	35	152	0.39	0.0002	9606.ENSP00000001008,9606.ENSP00000248444,9606.ENSP00000253925,9606.ENSP00000259365,9606.ENSP00000262215,9606.ENSP00000263168,9606.ENSP00000263867,9606.ENSP00000264071,9606.ENSP00000264758,9606.ENSP00000283027,9606.ENSP00000296755,9606.ENSP00000296930,9606.ENSP00000303908,9606.ENSP00000308753,9606.ENSP00000311747,9606.ENSP00000314067,9606.ENSP00000347719,9606.ENSP00000348381,9606.ENSP00000349259,…	FKBP4,VIL1,PPFIA1,TMOD1,ARFGEF1,CAPZA1,CAPG,TUBB4A,ADD1,NUBP1,MAP1B,NPM1,TWF2,TMOD3,RBM14,PAK2,TBCD,ADD3,SPTBN1,GMFB,LMOD1,F11R,SPTA1,SPTAN1,GSN,MAPRE1,CORO1B,LIMA1,CTNNA2,CAPZB,STMN1,FAM49B,TWF1,SPTB,WASF2
GO:0140053	Mitochondrial gene expression	33	143	0.39	0.00033	9606.ENSP00000081029,9606.ENSP00000168216,9606.ENSP00000245539,9606.ENSP00000253099,9606.ENSP00000254630,9606.ENSP00000256441,9606.ENSP00000258383,9606.ENSP00000258455,9606.ENSP00000258770,9606.ENSP00000261772,9606.ENSP00000279242,9606.ENSP00000305682,9606.ENSP00000312356,9606.ENSP00000313877,9606.ENSP00000315017,9606.ENSP00000322439,9606.ENSP00000333837,9606.ENSP00000354086,9606.ENSP00000354525,…	MRPS35,HSD17B10,MRPS7,MRPL4,PTCD3,MRPS36,MRPL44,MRPS9,TBRG4,AARS,MRPL49,MRPL39,TRMT10C,TSFM,MRPL1,TUFM,MRPL12,MRPL37,MRPL24,DARS2,IARS2,DAP3,GARS,MRPL19,MRPS6,PNPT1,MRPS22,GFM1,TFAM,HARS,MRPS27,SARS2,MRPL45
GO:0060968	Regulation of gene silencing	32	137	0.39	0.00035	9606.ENSP00000220592,9606.ENSP00000244537,9606.ENSP00000245544,9606.ENSP00000254508,9606.ENSP00000261396,9606.ENSP00000265351,9606.ENSP00000283195,9606.ENSP00000285968,9606.ENSP00000302486,9606.ENSP00000307705,9606.ENSP00000310668,9606.ENSP00000329662,9606.ENSP00000330074,9606.ENSP00000333277,9606.ENSP00000339566,9606.ENSP00000350170,9606.ENSP00000352252,9606.ENSP00000356448,9606.ENSP00000356520,…	AGO2,HIST1H4F,NUP85,NUP210,NUP133,XPO5,RANBP2,NUP205,MAP2K1,HIST1H1E,NUP93,H1FX,HIST1H1B,HIST2H3D,HIST1H1C,FXR1,HIST1H3J,TPR,DHX9,ADAR,FMR1,ZMPSTE24,NUP160,POLR2B,SEC13,SIN3A,RAE1,ELAVL1,POLR2H,EIF4G1,NUP62,POLR2A
GO:0034614	Cellular response to reactive oxygen species	31	133	0.39	0.00048	9606.ENSP00000012443,9606.ENSP00000215832,9606.ENSP00000216714,9606.ENSP00000219070,9606.ENSP00000225174,9606.ENSP00000262746,9606.ENSP00000263025,9606.ENSP00000265462,9606.ENSP00000267257,9606.ENSP00000270142,9606.ENSP00000278572,9606.ENSP00000287295,9606.ENSP00000295834,9606.ENSP00000298510,9606.ENSP00000300574,9606.ENSP00000313199,9606.ENSP00000319788,9606.ENSP00000346148,9606.ENSP00000351022,…	PPP5C,MAPK1,APEX1,MMP2,PPIF,PRDX1,MAPK3,PRDX5,PXN,SOD1,RPS3,AIFM1,FABP1,PRDX3,CRK,HNRNPD,NQO1,PRKAA1,TPM1,ADPRHL2,SRC,PCNA,AKR1C3,SOD3,DNM2,PDCD10,DPEP1,CDK1,CST3,PARK7,HDAC2
GO:0042177	Negative regulation of protein catabolic process	31	135	0.39	0.00059	9606.ENSP00000003100,9606.ENSP00000037243,9606.ENSP00000217244,9606.ENSP00000221566,9606.ENSP00000230085,9606.ENSP00000261601,9606.ENSP00000268058,9606.ENSP00000299138,9606.ENSP00000300231,9606.ENSP00000305790,9606.ENSP00000310670,9606.ENSP00000338039,9606.ENSP00000339095,9606.ENSP00000343535,9606.ENSP00000346032,9606.ENSP00000346483,9606.ENSP00000356425,9606.ENSP00000358866,9606.ENSP00000359345,…	CYP51A1,GABARAPL2,CSNK2A1,SGTA,SNX3,USP14,PML,VPS35,MAP1A,SF3B3,CCAR2,PSMF1,RPS7,USP7,ANXA2,DDRGK1,UCHL5,FLNA,RPL5,HSP90AB1,CTSA,RPL11,BAG6,GIPC1,CST3,ROCK1,PARK7,RPL23,CDK5RAP3,PHB,SNX12
GO:0060147	Regulation of posttranscriptional gene silencing	27	117	0.39	0.0016	9606.ENSP00000220592,9606.ENSP00000244537,9606.ENSP00000245544,9606.ENSP00000254508,9606.ENSP00000261396,9606.ENSP00000265351,9606.ENSP00000283195,9606.ENSP00000285968,9606.ENSP00000302486,9606.ENSP00000310668,9606.ENSP00000333277,9606.ENSP00000350170,9606.ENSP00000352252,9606.ENSP00000356448,9606.ENSP00000356520,9606.ENSP00000357459,9606.ENSP00000359506,9606.ENSP00000361845,9606.ENSP00000367721,…	AGO2,HIST1H4F,NUP85,NUP210,NUP133,XPO5,RANBP2,NUP205,MAP2K1,NUP93,HIST2H3D,FXR1,HIST1H3J,TPR,DHX9,ADAR,FMR1,ZMPSTE24,NUP160,POLR2B,SEC13,RAE1,ELAVL1,POLR2H,EIF4G1,NUP62,POLR2A
GO:0060966	Regulation of gene silencing by rna	27	117	0.39	0.0016	9606.ENSP00000220592,9606.ENSP00000244537,9606.ENSP00000245544,9606.ENSP00000254508,9606.ENSP00000261396,9606.ENSP00000265351,9606.ENSP00000283195,9606.ENSP00000285968,9606.ENSP00000302486,9606.ENSP00000310668,9606.ENSP00000333277,9606.ENSP00000350170,9606.ENSP00000352252,9606.ENSP00000356448,9606.ENSP00000356520,9606.ENSP00000357459,9606.ENSP00000359506,9606.ENSP00000361845,9606.ENSP00000367721,…	AGO2,HIST1H4F,NUP85,NUP210,NUP133,XPO5,RANBP2,NUP205,MAP2K1,NUP93,HIST2H3D,FXR1,HIST1H3J,TPR,DHX9,ADAR,FMR1,ZMPSTE24,NUP160,POLR2B,SEC13,RAE1,ELAVL1,POLR2H,EIF4G1,NUP62,POLR2A
GO:0052126	Movement in host environment	25	108	0.39	0.0026	9606.ENSP00000238497,9606.ENSP00000261023,9606.ENSP00000261667,9606.ENSP00000261769,9606.ENSP00000265062,9606.ENSP00000265986,9606.ENSP00000293379,9606.ENSP00000296585,9606.ENSP00000303754,9606.ENSP00000333298,9606.ENSP00000339191,9606.ENSP00000344456,9606.ENSP00000346067,9606.ENSP00000353224,9606.ENSP00000357005,9606.ENSP00000362680,9606.ENSP00000376345,9606.ENSP00000378699,9606.ENSP00000379350,…	VPS4B,ITGAV,KPNA3,CDH1,RAB7A,IDE,ITGA5,ITGA2,PPID,LAMP1,CAV1,CTNNB1,RPSA,TFRC,F11R,SRC,GRB2,CDK1,ITGB1,CTNND1,PPIA,IST1,SLC1A5,MRC1,PHB
GO:1901606	Alpha-amino acid catabolic process	24	104	0.39	0.0035	9606.ENSP00000205402,9606.ENSP00000217426,9606.ENSP00000245206,9606.ENSP00000254878,9606.ENSP00000265395,9606.ENSP00000265594,9606.ENSP00000265838,9606.ENSP00000277865,9606.ENSP00000281243,9606.ENSP00000284031,9606.ENSP00000299299,9606.ENSP00000317379,9606.ENSP00000318868,9606.ENSP00000322991,9606.ENSP00000333667,9606.ENSP00000343657,9606.ENSP00000352706,9606.ENSP00000357838,9606.ENSP00000363614,…	DLD,AHCY,GOT2,HRSP12,HIBADH,MCCC1,ACAT1,GLUD1,QDPR,DDAH1,PCBD1,GLS,SHMT1,BCAT2,SHMT2,MCCC2,HIBCH,OAT,HMGCL,ALDH4A1,FAH,ALDH7A1,IVD,ALDH6A1
GO:0000910	Cytokinesis	23	100	0.39	0.0047	9606.ENSP00000216181,9606.ENSP00000229340,9606.ENSP00000238497,9606.ENSP00000260746,9606.ENSP00000263238,9606.ENSP00000264893,9606.ENSP00000285735,9606.ENSP00000317985,9606.ENSP00000324205,9606.ENSP00000341524,9606.ENSP00000349259,9606.ENSP00000367220,9606.ENSP00000380824,9606.ENSP00000380998,9606.ENSP00000381992,9606.ENSP00000382697,9606.ENSP00000391249,9606.ENSP00000398610,9606.ENSP00000400175,…	MYH9,RAB35,VPS4B,ARL3,ACTR3,SEPT11,RHOC,ROCK2,CHMP4A,SEPT6,SPTBN1,ACTR2,SEPT10,CHMP1A,SEPT7,ROCK1,SEPT9,ANXA11,RHOA,STMN1,PDCD6IP,CFL1,IST1
GO:0032092	Positive regulation of protein binding	20	86	0.39	0.0093	9606.ENSP00000252486,9606.ENSP00000264758,9606.ENSP00000265986,9606.ENSP00000272519,9606.ENSP00000284981,9606.ENSP00000296161,9606.ENSP00000339191,9606.ENSP00000345259,9606.ENSP00000346032,9606.ENSP00000357129,9606.ENSP00000360609,9606.ENSP00000361892,9606.ENSP00000363676,9606.ENSP00000364721,9606.ENSP00000365569,9606.ENSP00000383003,9606.ENSP00000419782,9606.ENSP00000446215,9606.ENSP00000452780,…	APOE,ADD1,IDE,RALB,APP,DTX3L,CAV1,EPB41,ANXA2,SPTA1,HSP90AB1,STK4,RPL11,MAPRE1,FLOT1,FKBP1A,CDK5,RAN,B2M,SPON1
GO:0051668	Localization within membrane	20	86	0.39	0.0093	9606.ENSP00000005257,9606.ENSP00000252486,9606.ENSP00000261396,9606.ENSP00000262375,9606.ENSP00000303423,9606.ENSP00000334153,9606.ENSP00000338844,9606.ENSP00000343405,9606.ENSP00000348461,9606.ENSP00000348888,9606.ENSP00000349486,9606.ENSP00000356790,9606.ENSP00000357218,9606.ENSP00000358866,9606.ENSP00000373312,9606.ENSP00000378721,9606.ENSP00000381823,9606.ENSP00000387286,9606.ENSP00000419782,…	RALA,APOE,NUP133,DNAJA3,FNTA,RFTN1,SEC23B,SEC24C,RAC1,PIGR,SCRIB,ATP1B1,APOA1BP,FLNA,SEC13,SEC31A,SEC24A,RAB1A,CDK5,SEC24B
GO:0043462	Regulation of atpase activity	19	82	0.39	0.0125	9606.ENSP00000037243,9606.ENSP00000216479,9606.ENSP00000225174,9606.ENSP00000233146,9606.ENSP00000234420,9606.ENSP00000254322,9606.ENSP00000263354,9606.ENSP00000265056,9606.ENSP00000283179,9606.ENSP00000286371,9606.ENSP00000314030,9606.ENSP00000351022,9606.ENSP00000356520,9606.ENSP00000356790,9606.ENSP00000367542,9606.ENSP00000369127,9606.ENSP00000376297,9606.ENSP00000419665,9606.ENSP00000477310	GABARAPL2,AHSA1,PPIF,MSH2,MSH6,DNAJB1,NAPA,MCM2,HNRNPU,ATP1B3,DNAJA2,TPM1,DHX9,ATP1B1,TPM2,DNAJA1,DYNLL1,SSBP1,DYNLL2
GO:0030433	Ubiquitin-dependent erad pathway	17	73	0.39	0.0203	9606.ENSP00000221566,9606.ENSP00000223641,9606.ENSP00000225726,9606.ENSP00000259335,9606.ENSP00000261942,9606.ENSP00000263202,9606.ENSP00000276461,9606.ENSP00000295770,9606.ENSP00000299767,9606.ENSP00000323889,9606.ENSP00000331487,9606.ENSP00000345195,9606.ENSP00000351777,9606.ENSP00000365131,9606.ENSP00000365576,9606.ENSP00000401802,9606.ENSP00000410964	SGTA,SEC61B,CCDC47,KIAA0368,FAF2,UFD1L,ERLIN2,STT3B,HSP90B1,TRIM25,NPLOC4,UBQLN2,VCP,BAG6,UBQLN1,PSMC6,ERLIN1
GO:0043574	Peroxisomal transport	16	70	0.39	0.0307	9606.ENSP00000221418,9606.ENSP00000264167,9606.ENSP00000265986,9606.ENSP00000272317,9606.ENSP00000293217,9606.ENSP00000316357,9606.ENSP00000333664,9606.ENSP00000349722,9606.ENSP00000359233,9606.ENSP00000360569,9606.ENSP00000363614,9606.ENSP00000371517,9606.ENSP00000388107,9606.ENSP00000390265,9606.ENSP00000420914,9606.ENSP00000431049	ECH1,AGPS,IDE,RPS27A,ACOX1,USP9X,ACAA1,UBE2D3,ABCD3,SCP2,HMGCL,AMACR,UBA52,IDH1,HSD17B4,GSTK1
GO:0009166	Nucleotide catabolic process	15	65	0.39	0.0371	9606.ENSP00000245552,9606.ENSP00000262878,9606.ENSP00000265838,9606.ENSP00000298556,9606.ENSP00000304229,9606.ENSP00000322524,9606.ENSP00000338352,9606.ENSP00000339479,9606.ENSP00000351777,9606.ENSP00000354532,9606.ENSP00000369456,9606.ENSP00000370376,9606.ENSP00000377470,9606.ENSP00000416583,9606.ENSP00000422375	NT5C,SAMHD1,ACAT1,HPRT1,HINT1,DCTPP1,NUDT4,NT5C2,VCP,PNP,ITPA,DUT,CNP,DERA,NUDT16
GO:0018208	Peptidyl-proline modification	14	60	0.39	0.0446	9606.ENSP00000001008,9606.ENSP00000216330,9606.ENSP00000225174,9606.ENSP00000283195,9606.ENSP00000303754,9606.ENSP00000306614,9606.ENSP00000323696,9606.ENSP00000362773,9606.ENSP00000377036,9606.ENSP00000379042,9606.ENSP00000383003,9606.ENSP00000384999,9606.ENSP00000419425,9606.ENSP00000444810	FKBP4,FKBP3,PPIF,RANBP2,PPID,PPIH,CRTAP,PIN4,PPP2R4,ERO1L,FKBP1A,P4HA2,PPIA,FKBP5
GO:0034605	Cellular response to heat	14	60	0.39	0.0446	9606.ENSP00000256383,9606.ENSP00000264335,9606.ENSP00000264933,9606.ENSP00000294053,9606.ENSP00000335153,9606.ENSP00000351777,9606.ENSP00000356448,9606.ENSP00000358081,9606.ENSP00000360609,9606.ENSP00000369424,9606.ENSP00000373620,9606.ENSP00000392896,9606.ENSP00000430432,9606.ENSP00000440045	EIF2S1,YWHAE,PDCD6,CLPB,HSP90AA1,VCP,TPR,BAG3,HSP90AB1,RBBP7,HSPD1,HSBP1,HDAC2,ATP2A2
GO:1901799	Negative regulation of proteasomal protein catabolic process	14	60	0.39	0.0446	9606.ENSP00000037243,9606.ENSP00000221566,9606.ENSP00000261601,9606.ENSP00000300231,9606.ENSP00000310670,9606.ENSP00000338039,9606.ENSP00000343535,9606.ENSP00000346483,9606.ENSP00000356425,9606.ENSP00000360609,9606.ENSP00000363676,9606.ENSP00000365131,9606.ENSP00000376753,9606.ENSP00000418770	GABARAPL2,SGTA,USP14,MAP1A,CCAR2,PSMF1,USP7,DDRGK1,UCHL5,HSP90AB1,RPL11,BAG6,GIPC1,PARK7
GO:0006027	Glycosaminoglycan catabolic process	14	61	0.39	0.0489	9606.ENSP00000052754,9606.ENSP00000261416,9606.ENSP00000265077,9606.ENSP00000266718,9606.ENSP00000268097,9606.ENSP00000306920,9606.ENSP00000312506,9606.ENSP00000327336,9606.ENSP00000343924,9606.ENSP00000347041,9606.ENSP00000363603,9606.ENSP00000363827,9606.ENSP00000370542,9606.ENSP00000398632	DCN,HEXB,VCAN,LUM,HEXA,GLB1,CSPG4,BGN,PRELP,FMOD,FUCA1,HSPG2,SDC1,CD44
GO:0045824	Negative regulation of innate immune response	14	61	0.39	0.0489	9606.ENSP00000161559,9606.ENSP00000216129,9606.ENSP00000262375,9606.ENSP00000262878,9606.ENSP00000300574,9606.ENSP00000343445,9606.ENSP00000357113,9606.ENSP00000357459,9606.ENSP00000378856,9606.ENSP00000379873,9606.ENSP00000399168,9606.ENSP00000418194,9606.ENSP00000470972,9606.ENSP00000478490	CEACAM1,TTLL12,DNAJA3,SAMHD1,CRK,SERPINB4,IFI16,ADAR,LGALS9,HLA-A,HLA-B,PARP14,RPS19,YTHDF3
GO:0043933	Protein-containing complex subunit organization	350	1539	0.38	1.42e-44	9606.ENSP00000001008,9606.ENSP00000037243,9606.ENSP00000054666,9606.ENSP00000081029,9606.ENSP00000168216,9606.ENSP00000184266,9606.ENSP00000210313,9606.ENSP00000215375,9606.ENSP00000215754,9606.ENSP00000215793,9606.ENSP00000215829,9606.ENSP00000216190,9606.ENSP00000216218,9606.ENSP00000216297,9606.ENSP00000216554,9606.ENSP00000217958,9606.ENSP00000220325,9606.ENSP00000220592,9606.ENSP00000220849,…	FKBP4,GABARAPL2,VAMP3,MRPS35,HSD17B10,NDUFB4,PSMD5,ATP5D,MIF,SF3A1,SNRPD3,EIF3D,ST13,SUPT16H,EIF5,PSMD10,EHD4,AGO2,EIF3E,AIMP2,CTSC,PRPF19,APOC3,SART3,SRSF9,WDR77,APOA1,VPS4B,TFG,SRSF6,HIST1H4F,MRPS7,VASP,PYCARD,EIF3K,VIL1,ALDH1A2,CORO7,TSG101,APOE,NDUFA10,EIF2S3,MRPL4,EIF3G,GRWD1,FUS,NUP210,PTCD3,RPA1,NASP,MRPS36,LAMC1,MRPL44,MRPS9,SRSF1,KIAA0368,NUP133,UBE2K,KPNA3,PSMD11,EIF3J,MCM4,TCEB2,SLC9A3…
GO:0045184	Establishment of protein localization	350	1564	0.38	2.84e-43	9606.ENSP00000000412,9606.ENSP00000037243,9606.ENSP00000054666,9606.ENSP00000215570,9606.ENSP00000216034,9606.ENSP00000216181,9606.ENSP00000219169,9606.ENSP00000221418,9606.ENSP00000221566,9606.ENSP00000222247,9606.ENSP00000223136,9606.ENSP00000223641,9606.ENSP00000225430,9606.ENSP00000225724,9606.ENSP00000229314,9606.ENSP00000229340,9606.ENSP00000229390,9606.ENSP00000230050,9606.ENSP00000230085,…	M6PR,GABARAPL2,VAMP3,TIMM13,TOMM22,MYH9,NUTF2,ECH1,SGTA,RPL18A,FIS1,SEC61B,RPL19,GOSR1,GOLT1B,RAB35,SRSF9,RPS12,SNX3,GORASP2,CPSF3,VPS4B,SRSF6,NUP85,THOC2,CANX,PMPCB,MTX2,COPB1,AP1M2,CORO7,RPS16,TSG101,APOE,XPO7,ATP6V1E1,VPS25,NUP210,NASP,ARF3,COG3,SRSF1,RPL35,ARL3,DNAJC13,NUP133,IPO5,ARL1,KPNA3,ERP29,SNX1,FAF2,TRAM1,ARFGEF1,RPL8,RAB2A,CSE1L,UFD1L,NAPA,SPCS2,ARCN1,AGPS,YWHAE,RAB10,PDCD6,GRPEL1,RA…
GO:0015031	Protein transport	337	1486	0.38	1.61e-42	9606.ENSP00000000412,9606.ENSP00000037243,9606.ENSP00000054666,9606.ENSP00000215570,9606.ENSP00000216034,9606.ENSP00000216181,9606.ENSP00000219169,9606.ENSP00000221418,9606.ENSP00000221566,9606.ENSP00000222247,9606.ENSP00000223136,9606.ENSP00000223641,9606.ENSP00000225430,9606.ENSP00000225724,9606.ENSP00000229314,9606.ENSP00000229340,9606.ENSP00000229390,9606.ENSP00000230050,9606.ENSP00000230085,…	M6PR,GABARAPL2,VAMP3,TIMM13,TOMM22,MYH9,NUTF2,ECH1,SGTA,RPL18A,FIS1,SEC61B,RPL19,GOSR1,GOLT1B,RAB35,SRSF9,RPS12,SNX3,CPSF3,VPS4B,SRSF6,NUP85,THOC2,CANX,PMPCB,MTX2,COPB1,AP1M2,CORO7,RPS16,TSG101,APOE,XPO7,ATP6V1E1,VPS25,NUP210,NASP,ARF3,COG3,SRSF1,RPL35,ARL3,DNAJC13,NUP133,IPO5,ARL1,KPNA3,ERP29,SNX1,FAF2,TRAM1,ARFGEF1,RPL8,RAB2A,CSE1L,UFD1L,NAPA,SPCS2,ARCN1,AGPS,YWHAE,RAB10,PDCD6,GRPEL1,RAB7A,XPO5…
GO:0015833	Peptide transport	340	1518	0.38	5.86e-42	9606.ENSP00000000412,9606.ENSP00000027335,9606.ENSP00000037243,9606.ENSP00000054666,9606.ENSP00000215570,9606.ENSP00000216034,9606.ENSP00000216181,9606.ENSP00000219169,9606.ENSP00000221418,9606.ENSP00000221566,9606.ENSP00000222247,9606.ENSP00000223136,9606.ENSP00000223641,9606.ENSP00000225430,9606.ENSP00000225724,9606.ENSP00000229314,9606.ENSP00000229340,9606.ENSP00000229390,9606.ENSP00000230050,…	M6PR,CDH17,GABARAPL2,VAMP3,TIMM13,TOMM22,MYH9,NUTF2,ECH1,SGTA,RPL18A,FIS1,SEC61B,RPL19,GOSR1,GOLT1B,RAB35,SRSF9,RPS12,SNX3,CPSF3,VPS4B,SRSF6,NUP85,THOC2,CANX,PMPCB,MTX2,COPB1,AP1M2,CORO7,RPS16,TSG101,APOE,XPO7,ATP6V1E1,VPS25,NUP210,NASP,ARF3,COG3,SRSF1,RPL35,ARL3,DNAJC13,NUP133,IPO5,ARL1,KPNA3,ERP29,SNX1,FAF2,TRAM1,ARFGEF1,RPL8,SLC9A3R1,RAB2A,CSE1L,UFD1L,NAPA,SPCS2,ARCN1,AGPS,YWHAE,RAB10,PDCD6,GR…
GO:0140352	Export from cell	231	1028	0.38	1.1e-27	9606.ENSP00000000412,9606.ENSP00000005257,9606.ENSP00000054666,9606.ENSP00000161559,9606.ENSP00000199764,9606.ENSP00000215754,9606.ENSP00000215832,9606.ENSP00000216181,9606.ENSP00000216336,9606.ENSP00000217971,9606.ENSP00000219022,9606.ENSP00000219313,9606.ENSP00000220166,9606.ENSP00000222968,9606.ENSP00000223321,9606.ENSP00000225777,9606.ENSP00000226253,9606.ENSP00000226574,9606.ENSP00000227266,…	M6PR,RALA,VAMP3,CEACAM1,CEACAM6,MIF,MAPK1,MYH9,CTSG,PGRMC1,OLFM4,PSMD7,CTSH,PDAP1,PSMA2,SYNGR2,ALDOC,NFKB1,CTSC,MLEC,LTA4H,MAPK14,HRG,CTSD,APOA1,CD97,C3,CANX,PYCARD,TUBA4A,COPB1,TSG101,ACLY,PPFIA1,LGALS3,CAB39,PSMB7,GGH,DNAJC13,ITGAV,HEXB,PSMD11,ERP29,FAF2,PSMB1,ARFGEF1,COTL1,ERP44,LGALS3BP,NAPA,AGA,PSMD3,RAB10,KNG1,RAB7A,SRP14,IQGAP1,PFKL,SOD1,PSMA5,DYNC1LI1,LIN7C,LAMTOR1,FERMT3,OLA1,APP,PDIA4,A…
GO:0009894	Regulation of catabolic process	232	1038	0.38	1.56e-27	9606.ENSP00000003100,9606.ENSP00000037243,9606.ENSP00000044462,9606.ENSP00000052754,9606.ENSP00000157812,9606.ENSP00000179259,9606.ENSP00000210313,9606.ENSP00000215071,9606.ENSP00000216044,9606.ENSP00000216455,9606.ENSP00000216714,9606.ENSP00000216802,9606.ENSP00000217244,9606.ENSP00000217958,9606.ENSP00000219313,9606.ENSP00000220592,9606.ENSP00000221566,9606.ENSP00000223321,9606.ENSP00000227266,…	CYP51A1,GABARAPL2,PSMA4,DCN,PSMC4,C12orf5,PSMD5,PSMD8,GTPBP1,PSMA3,APEX1,PSME2,CSNK2A1,PSMD10,PSMD7,AGO2,SGTA,PSMA2,CTSC,APOC3,YBX3,GAPDH,USP5,GCLC,MAPK14,SNX3,APOA1,TARDBP,ZC3HAV1,NUP85,CAPNS1,PYCARD,APOE,ATP6V1E1,FUS,TRIM21,NUP210,HRSP12,LAMTOR5,TBRG4,PSMB7,LRPPRC,PSMC1,NUP133,UBE2K,PSMA6,USP14,PSMD11,CDH1,SNX1,PSMB1,MAPK3,PSMD3,NSUN2,RAB7A,VDAC1,CPT1A,IDE,PML,PSMA5,RPS27A,RALB,RAB5A,ATP6V1A,CI…
GO:0055114	Oxidation-reduction process	214	939	0.38	3.13e-26	9606.ENSP00000003100,9606.ENSP00000168216,9606.ENSP00000184266,9606.ENSP00000203407,9606.ENSP00000205402,9606.ENSP00000215375,9606.ENSP00000216254,9606.ENSP00000216605,9606.ENSP00000216714,9606.ENSP00000217515,9606.ENSP00000217901,9606.ENSP00000220764,9606.ENSP00000220966,9606.ENSP00000221130,9606.ENSP00000221418,9606.ENSP00000223127,9606.ENSP00000225573,9606.ENSP00000226253,9606.ENSP00000229239,…	CYP51A1,HSD17B10,NDUFB4,UQCRC1,DLD,ATP5D,ACO2,MTHFD1,APEX1,TXNL1,IDH3G,DECR1,PYCRL,GSR,ECH1,PLOD3,PNPO,ALDOC,GAPDH,TPI1,MAPK14,SPR,ENO1,APOA1,ACADS,PTGIS,COX6B1,ALDH1A2,PGLS,NDUFA10,ACSS2,SQRDL,ALDH2,COQ9,PRDX1,ILVBL,NDUFS3,AGPS,CPOX,SDHA,HIBADH,PRDX5,CPT1A,ACAT1,SORD,NDUFB10,PFKL,SOD1,SH3BGRL3,GLUD1,HSD17B12,DLAT,QDPR,GPD1L,ACAA2,PDIA4,AIFM1,HK2,CTBP1,CALM3,ETHE1,ACOX1,NDUFAF2,PRDX3,NDUFB8,PCBD1…
GO:0006082	Organic acid metabolic process	216	964	0.38	1.16e-25	9606.ENSP00000011292,9606.ENSP00000052754,9606.ENSP00000168216,9606.ENSP00000205402,9606.ENSP00000215754,9606.ENSP00000216254,9606.ENSP00000216605,9606.ENSP00000216780,9606.ENSP00000216951,9606.ENSP00000217426,9606.ENSP00000217901,9606.ENSP00000220764,9606.ENSP00000220966,9606.ENSP00000221418,9606.ENSP00000222572,9606.ENSP00000223029,9606.ENSP00000223127,9606.ENSP00000226253,9606.ENSP00000228740,…	CPA1,DCN,HSD17B10,DLD,MIF,ACO2,MTHFD1,PCK2,GSS,AHCY,IDH3G,DECR1,PYCRL,ECH1,PON2,AIMP2,PLOD3,ALDOC,LTA4H,GAPDH,TPI1,CMAS,GCLC,MAPK14,ENO1,SARS,ATIC,ACADS,PTGIS,PEPD,GOT2,C3,ALDH1A2,ACSS2,ACLY,HRSP12,MRPS36,NARS,GGH,HEXB,AARS,PTPLAD1,MARS,MAPK3,ILVBL,OSBP,DARS,CAD,SDHA,VCAN,PAPSS1,VDAC1,HIBADH,MCCC1,CPT1A,ACAT1,LUM,SORD,HEXA,PFKL,ITIH1,ENOPH1,GLUD1,HSD17B12,DLAT,QDPR,FARSB,DDAH1,ACAA2,ACSM3,HK2,ACO…
GO:0043436	Oxoacid metabolic process	213	944	0.38	1.27e-25	9606.ENSP00000011292,9606.ENSP00000052754,9606.ENSP00000168216,9606.ENSP00000205402,9606.ENSP00000215754,9606.ENSP00000216254,9606.ENSP00000216605,9606.ENSP00000216780,9606.ENSP00000216951,9606.ENSP00000217426,9606.ENSP00000217901,9606.ENSP00000220764,9606.ENSP00000220966,9606.ENSP00000221418,9606.ENSP00000222572,9606.ENSP00000223029,9606.ENSP00000223127,9606.ENSP00000226253,9606.ENSP00000228740,…	CPA1,DCN,HSD17B10,DLD,MIF,ACO2,MTHFD1,PCK2,GSS,AHCY,IDH3G,DECR1,PYCRL,ECH1,PON2,AIMP2,PLOD3,ALDOC,LTA4H,GAPDH,TPI1,CMAS,GCLC,MAPK14,ENO1,SARS,ATIC,ACADS,PTGIS,PEPD,GOT2,C3,ALDH1A2,ACSS2,ACLY,HRSP12,MRPS36,NARS,GGH,HEXB,AARS,PTPLAD1,MARS,MAPK3,ILVBL,OSBP,DARS,CAD,SDHA,VCAN,PAPSS1,VDAC1,HIBADH,MCCC1,CPT1A,ACAT1,LUM,SORD,HEXA,PFKL,ITIH1,ENOPH1,GLUD1,HSD17B12,DLAT,QDPR,FARSB,DDAH1,ACAA2,ACSM3,HK2,ACO…
GO:0034660	ncRNA metabolic process	106	467	0.38	1.47e-12	9606.ENSP00000168216,9606.ENSP00000216038,9606.ENSP00000220592,9606.ENSP00000221801,9606.ENSP00000223029,9606.ENSP00000230340,9606.ENSP00000230640,9606.ENSP00000232888,9606.ENSP00000234677,9606.ENSP00000242784,9606.ENSP00000246868,9606.ENSP00000251453,9606.ENSP00000256854,9606.ENSP00000258383,9606.ENSP00000259469,9606.ENSP00000261700,9606.ENSP00000261772,9606.ENSP00000262027,9606.ENSP00000263239,…	HSD17B10,RTCB,AGO2,FBL,AIMP2,BYSL,SKIV2L2,RRP9,SARS,C19orf43,SBDS,RPS16,NARS,MRPL44,RPL35,C14orf166,AARS,MARS,DDX18,DARS,NOP58,NSUN2,XPO5,EIF4A3,FARSB,PA2G4,RPS9,QARS,WDR3,SART1,TRMT10C,PRKDC,MRPL1,PRKRA,FARSA,RRS1,KARS,RPS7,RPL7,RPS2,PPA2,RPS21,RPS17,DDX21,HNRNPA2B1,PES1,WARS,PUS7,GTPBP4,DARS2,HEATR1,IARS2,EPRS,ADAR,RPS27,DKC1,PDCD11,RPL5,RPL7A,CSTF2,PPA1,YARS,PIN4,RPL10A,EIF6,RPL11,IARS,VARS,XR…
GO:0007005	Mitochondrion organization	101	452	0.38	1.28e-11	9606.ENSP00000037243,9606.ENSP00000168216,9606.ENSP00000184266,9606.ENSP00000215375,9606.ENSP00000215570,9606.ENSP00000216034,9606.ENSP00000223136,9606.ENSP00000225174,9606.ENSP00000229416,9606.ENSP00000249269,9606.ENSP00000249442,9606.ENSP00000252711,9606.ENSP00000262030,9606.ENSP00000262375,9606.ENSP00000262570,9606.ENSP00000263774,9606.ENSP00000264335,9606.ENSP00000264954,9606.ENSP00000268668,…	GABARAPL2,HSD17B10,NDUFB4,ATP5D,TIMM13,TOMM22,FIS1,PPIF,GCLC,PMPCB,MTX2,NDUFA10,ATP5B,DNAJA3,CHCHD3,NDUFS3,YWHAE,GRPEL1,NDUFB10,TIMM44,CISD2,GGCT,SLC25A4,TOMM70A,ACAA2,AIFM1,ATP5O,HK2,CALM3,NDUFAF2,HSPA9,PRDX3,VPS35,NDUFB8,ATP5L,ATP5H,HSPA4,LETM1,YWHAG,CYCS,HCFC1,CCAR2,ATAD3B,TMEM70,ACAD9,NDUFS8,BID,NDUFV1,NDUFV2,NDUFA12,HSP90AA1,SFN,SAMM50,ATG7,STOML2,ATP5C1,LONP1,COA3,MT-ND4,PARP1,MTX1,ATP5F1,S…
GO:0048193	Golgi vesicle transport	81	359	0.38	1.72e-09	9606.ENSP00000037243,9606.ENSP00000054666,9606.ENSP00000225724,9606.ENSP00000227266,9606.ENSP00000230085,9606.ENSP00000240851,9606.ENSP00000249923,9606.ENSP00000251166,9606.ENSP00000256682,9606.ENSP00000258198,9606.ENSP00000258654,9606.ENSP00000260746,9606.ENSP00000261636,9606.ENSP00000261889,9606.ENSP00000262646,9606.ENSP00000263168,9606.ENSP00000263354,9606.ENSP00000264028,9606.ENSP00000264710,…	GABARAPL2,VAMP3,GOSR1,CTSC,SNX3,TFG,COPB1,CORO7,ARF3,DYNC1LI2,COG3,ARL3,ARL1,SNX1,RAB2A,CAPZA1,NAPA,ARCN1,RAB10,PDCD6,DYNC1LI1,RAB8A,TMED10,ARF4,SCAMP3,RAB6A,GAK,STX4,PITPNB,COPG1,COPB2,TMED9,LAMP1,SEC23B,SEC24C,VAPA,AP3D1,SPTBN1,VCP,DCTN1,COPA,SPTA1,SEC23IP,ACTR1A,TMED5,SURF4,SPTAN1,PEF1,OPTN,SNX2,SEC13,DNM2,MYO1B,DYNLL1,AP1G1,PPP6R3,PROS1,SEC31A,NSF,SEC24A,SAR1B,RAB1A,SCFD1,PPP6C,BCAP31,CAPZB,C…
GO:0043161	Proteasome-mediated ubiquitin-dependent protein catabolic process	73	323	0.38	1.32e-08	9606.ENSP00000044462,9606.ENSP00000157812,9606.ENSP00000210313,9606.ENSP00000215071,9606.ENSP00000216455,9606.ENSP00000216802,9606.ENSP00000217958,9606.ENSP00000219313,9606.ENSP00000221566,9606.ENSP00000223321,9606.ENSP00000223641,9606.ENSP00000225726,9606.ENSP00000259335,9606.ENSP00000259457,9606.ENSP00000261303,9606.ENSP00000261427,9606.ENSP00000261479,9606.ENSP00000261712,9606.ENSP00000261942,…	PSMA4,PSMC4,PSMD5,PSMD8,PSMA3,PSME2,PSMD10,PSMD7,SGTA,PSMA2,SEC61B,CCDC47,KIAA0368,PSMB7,PSMC1,UBE2K,PSMA6,PSMD11,FAF2,PSMB1,UFD1L,PSMD3,PCNP,PML,PSMA5,RPS27A,ERLIN2,UCHL1,PSMB4,PSME3,STT3B,HSP90B1,DDB1,PSMD1,PSMD2,PSMC5,TRIM25,NPLOC4,PSMF1,TRIM2,CTNNB1,UBQLN2,PSMD12,UBE2D3,RAD23B,PSMB10,VCP,CD2AP,PCBP2,PSMB5,BUB3,PSMD4,PSMA7,PSMB2,PSMB9,PSMB8,BAG6,UBQLN1,PSME1,CDK1,PLAA,PSMD14,UBA52,PSMC2,PSMD13…
GO:0060828	Regulation of canonical wnt signaling pathway	65	291	0.38	1.62e-07	9606.ENSP00000044462,9606.ENSP00000157812,9606.ENSP00000210313,9606.ENSP00000215071,9606.ENSP00000216455,9606.ENSP00000216802,9606.ENSP00000217289,9606.ENSP00000217958,9606.ENSP00000219313,9606.ENSP00000223321,9606.ENSP00000226574,9606.ENSP00000229795,9606.ENSP00000252486,9606.ENSP00000259457,9606.ENSP00000261303,9606.ENSP00000261479,9606.ENSP00000261712,9606.ENSP00000262193,9606.ENSP00000262613,…	PSMA4,PSMC4,PSMD5,PSMD8,PSMA3,PSME2,FERMT1,PSMD10,PSMD7,PSMA2,NFKB1,MAPK14,APOE,PSMB7,PSMC1,PSMA6,PSMD11,PSMB1,SLC9A3R1,PSMD3,PSMA5,APP,PSMB4,PSME3,VPS35,PSMD1,PSMD2,PSMC5,CCAR2,RUVBL1,PPP1CA,PPM1A,PSMF1,CAV1,CTNNB1,PSMD12,PSMB10,VCP,PSMB5,PSMD4,PSMA7,STK4,PSMB2,HDAC1,SRC,PSMB9,PSMB8,PSME1,JUP,G3BP1,ILK,CTNND1,DDX3X,PSMD14,PSMC2,PSMD13,PSMC6,TBL1XR1,PSMD6,CSNK1A1,PSMD9,PFDN5,RUVBL2,PSMC3,PSMB3
GO:0110053	Regulation of actin filament organization	61	273	0.38	4.47e-07	9606.ENSP00000228825,9606.ENSP00000236850,9606.ENSP00000245932,9606.ENSP00000247470,9606.ENSP00000248444,9606.ENSP00000253925,9606.ENSP00000259365,9606.ENSP00000262215,9606.ENSP00000262428,9606.ENSP00000262942,9606.ENSP00000263168,9606.ENSP00000263238,9606.ENSP00000263867,9606.ENSP00000264758,9606.ENSP00000267257,9606.ENSP00000285735,9606.ENSP00000292385,9606.ENSP00000294742,9606.ENSP00000298316,…	ARPC3,APOA1,VASP,PYCARD,VIL1,PPFIA1,TMOD1,ARFGEF1,COTL1,ARPC1A,CAPZA1,ACTR3,CAPG,ADD1,PXN,RHOC,DBN1,ARPC5,ARF6,TWF2,SYNPO2,TMOD3,PAK2,ROCK2,HCLS1,SERPINF2,ADD3,RAC1,SPTBN1,SH3BP1,GMFB,TPM1,MYO1C,CD47,LMOD1,F11R,SPTA1,ARHGAP18,FLNA,SPTAN1,GSN,CTTN,ACTR2,GRB2,CORO1B,LIMA1,ROCK1,CDC42,CTNNA2,ARPC4,ARFIP1,RHOA,CAPZB,STMN1,DBNL,FAM49B,CFL1,TWF1,SPTB,ACTG1,WASF2
GO:0034620	Cellular response to unfolded protein	29	129	0.38	0.0013	9606.ENSP00000247461,9606.ENSP00000256383,9606.ENSP00000264758,9606.ENSP00000281938,9606.ENSP00000290949,9606.ENSP00000297185,9606.ENSP00000299427,9606.ENSP00000299767,9606.ENSP00000307260,9606.ENSP00000316029,9606.ENSP00000320866,9606.ENSP00000349860,9606.ENSP00000351777,9606.ENSP00000354791,9606.ENSP00000357189,9606.ENSP00000357283,9606.ENSP00000358081,9606.ENSP00000360683,9606.ENSP00000368022,…	CANX,EIF2S1,ADD1,HSPB8,ATP6V0D1,HSPA9,TPP1,HSP90B1,TBL2,TLN1,CALR,GFPT1,VCP,DCTN1,HDGF,LMNA,BAG3,PTPN1,OPTN,HSPD1,SEC31A,ERO1L,VAPB,SRPRB,HSPA8,CDK5RAP3,ASNA1,DNAJC3,HYOU1
GO:0016051	Carbohydrate biosynthetic process	28	125	0.38	0.0018	9606.ENSP00000210444,9606.ENSP00000215882,9606.ENSP00000216780,9606.ENSP00000225665,9606.ENSP00000226253,9606.ENSP00000229239,9606.ENSP00000229270,9606.ENSP00000234590,9606.ENSP00000245206,9606.ENSP00000250124,9606.ENSP00000267814,9606.ENSP00000305603,9606.ENSP00000308610,9606.ENSP00000321259,9606.ENSP00000327070,9606.ENSP00000338703,9606.ENSP00000352779,9606.ENSP00000361140,9606.ENSP00000362413,…	NANS,SLC25A1,PCK2,SLC25A11,ALDOC,GAPDH,TPI1,ENO1,GOT2,MPDU1,SORD,FUT3,GPD2,TALDO1,MDH2,UGP2,SLC39A14,AKR1A1,PGK1,PGM2,SLC25A12,TKT,SLC25A13,GPI,FBP1,IMPA1,SLC2A1,SLC25A10
GO:2000278	Regulation of dna biosynthetic process	26	114	0.38	0.0024	9606.ENSP00000215832,9606.ENSP00000258091,9606.ENSP00000263025,9606.ENSP00000268058,9606.ENSP00000275603,9606.ENSP00000280326,9606.ENSP00000283179,9606.ENSP00000286788,9606.ENSP00000295688,9606.ENSP00000299300,9606.ENSP00000313199,9606.ENSP00000317334,9606.ENSP00000335153,9606.ENSP00000341826,9606.ENSP00000344456,9606.ENSP00000346694,9606.ENSP00000358563,9606.ENSP00000360609,9606.ENSP00000362409,…	MAPK1,CCT7,MAPK3,PML,CCT6A,CCT5,HNRNPU,CCT8,CCT3,CCT2,HNRNPD,TCP1,HSP90AA1,HNRNPA1,CTNNB1,HNRNPA2B1,DKC1,HSP90AB1,FAM129B,SRC,PCNA,PARP4,XRCC5,CCT4,DDX39B,HNRNPC
GO:0016052	Carbohydrate catabolic process	26	115	0.38	0.0026	9606.ENSP00000226253,9606.ENSP00000229239,9606.ENSP00000229270,9606.ENSP00000234590,9606.ENSP00000261416,9606.ENSP00000267814,9606.ENSP00000269848,9606.ENSP00000290573,9606.ENSP00000291295,9606.ENSP00000303356,9606.ENSP00000306920,9606.ENSP00000308610,9606.ENSP00000312250,9606.ENSP00000320171,9606.ENSP00000352401,9606.ENSP00000361140,9606.ENSP00000362413,9606.ENSP00000371393,9606.ENSP00000378360,…	ALDOC,GAPDH,TPI1,ENO1,HEXB,SORD,PFKL,HK2,CALM3,DCXR,GLB1,GPD2,ADPGK,PKM,RPE,AKR1A1,PGK1,PGM2,DAK,MAN2B1,GPI,DERA,NUDT5,LDHA,AMY2A,GALE
GO:0051817	Modulation of process of other organism involved in symbiotic interaction	22	97	0.38	0.007	9606.ENSP00000229239,9606.ENSP00000240185,9606.ENSP00000252486,9606.ENSP00000255030,9606.ENSP00000261531,9606.ENSP00000261667,9606.ENSP00000286713,9606.ENSP00000290158,9606.ENSP00000334373,9606.ENSP00000345656,9606.ENSP00000346032,9606.ENSP00000346437,9606.ENSP00000349486,9606.ENSP00000359506,9606.ENSP00000362649,9606.ENSP00000367208,9606.ENSP00000417175,9606.ENSP00000432083,9606.ENSP00000432660,…	GAPDH,TARDBP,APOE,CRP,SNW1,KPNA3,STOM,KPNB1,KPNA4,VAPA,ANXA2,ATG7,SCRIB,FMR1,HDAC1,SUGT1,VAPB,HSPA8,CFL1,PHB2,PHB,PSMC3
GO:2000117	Negative regulation of cysteine-type endopeptidase activity	21	93	0.38	0.0095	9606.ENSP00000217244,9606.ENSP00000248444,9606.ENSP00000256644,9606.ENSP00000262375,9606.ENSP00000264335,9606.ENSP00000265462,9606.ENSP00000295834,9606.ENSP00000298510,9606.ENSP00000306788,9606.ENSP00000314067,9606.ENSP00000340989,9606.ENSP00000357113,9606.ENSP00000362680,9606.ENSP00000368884,9606.ENSP00000376807,9606.ENSP00000382840,9606.ENSP00000398632,9606.ENSP00000418770,9606.ENSP00000419970,…	CSNK2A1,VIL1,LAMTOR5,DNAJA3,YWHAE,PRDX5,FABP1,PRDX3,ARL6IP1,PAK2,SFN,IFI16,SRC,RPS6KA3,DPEP1,DDX3X,CD44,PARK7,POR,CRYAB,RPS6KA1
GO:0007031	Peroxisome organization	18	79	0.38	0.0188	9606.ENSP00000221418,9606.ENSP00000223136,9606.ENSP00000264167,9606.ENSP00000265986,9606.ENSP00000272317,9606.ENSP00000293217,9606.ENSP00000316357,9606.ENSP00000333664,9606.ENSP00000349722,9606.ENSP00000359233,9606.ENSP00000360569,9606.ENSP00000363614,9606.ENSP00000371517,9606.ENSP00000388107,9606.ENSP00000390265,9606.ENSP00000420914,9606.ENSP00000431049,9606.ENSP00000449089	ECH1,FIS1,AGPS,IDE,RPS27A,ACOX1,USP9X,ACAA1,UBE2D3,ABCD3,SCP2,HMGCL,AMACR,UBA52,IDH1,HSD17B4,GSTK1,DNM1L
GO:0007032	Endosome organization	17	75	0.38	0.0254	9606.ENSP00000230085,9606.ENSP00000238497,9606.ENSP00000251968,9606.ENSP00000253794,9606.ENSP00000260818,9606.ENSP00000278671,9606.ENSP00000324205,9606.ENSP00000331201,9606.ENSP00000353444,9606.ENSP00000356602,9606.ENSP00000366565,9606.ENSP00000366746,9606.ENSP00000374455,9606.ENSP00000380998,9606.ENSP00000394496,9606.ENSP00000411825,9606.ENSP00000438399	SNX3,VPS4B,TSG101,VPS25,DNAJC13,LAMTOR1,CHMP4A,HGS,RAB5B,VTA1,VPS28,STAM,SQSTM1,CHMP1A,CORO1C,PDCD6IP,IST1
GO:0045739	Positive regulation of dna repair	16	71	0.38	0.0343	9606.ENSP00000179259,9606.ENSP00000253024,9606.ENSP00000254108,9606.ENSP00000278572,9606.ENSP00000296161,9606.ENSP00000313420,9606.ENSP00000316176,9606.ENSP00000326603,9606.ENSP00000345347,9606.ENSP00000355518,9606.ENSP00000355759,9606.ENSP00000356520,9606.ENSP00000358474,9606.ENSP00000367220,9606.ENSP00000368458,9606.ENSP00000422375	C12orf5,TRIM28,FUS,RPS3,DTX3L,PRKDC,UBE2N,SMCHD1,HMGB1,FH,PARP1,DHX9,BRCC3,ACTR2,PCNA,NUDT16
GO:1901292	Nucleoside phosphate catabolic process	16	71	0.38	0.0343	9606.ENSP00000245552,9606.ENSP00000262878,9606.ENSP00000265838,9606.ENSP00000298556,9606.ENSP00000304229,9606.ENSP00000322524,9606.ENSP00000338352,9606.ENSP00000339479,9606.ENSP00000351777,9606.ENSP00000354532,9606.ENSP00000369456,9606.ENSP00000370376,9606.ENSP00000377470,9606.ENSP00000416583,9606.ENSP00000419628,9606.ENSP00000422375	NT5C,SAMHD1,ACAT1,HPRT1,HINT1,DCTPP1,NUDT4,NT5C2,VCP,PNP,ITPA,DUT,CNP,DERA,NUDT5,NUDT16
GO:0006879	Cellular iron ion homeostasis	15	66	0.38	0.0411	9606.ENSP00000265729,9606.ENSP00000270142,9606.ENSP00000273398,9606.ENSP00000283027,9606.ENSP00000290949,9606.ENSP00000306752,9606.ENSP00000309477,9606.ENSP00000352779,9606.ENSP00000353224,9606.ENSP00000357633,9606.ENSP00000363162,9606.ENSP00000366525,9606.ENSP00000385834,9606.ENSP00000442318,9606.ENSP00000477572	SRI,SOD1,ATP6V1A,NUBP1,ATP6V0D1,BOLA2B,ACO1,SLC39A14,TFRC,GLRX3,ATP6V1G1,FTL,TF,CAND1,HMOX2
GO:0016925	Protein sumoylation	15	66	0.38	0.0411	9606.ENSP00000245544,9606.ENSP00000246548,9606.ENSP00000253024,9606.ENSP00000254508,9606.ENSP00000261396,9606.ENSP00000270225,9606.ENSP00000283195,9606.ENSP00000285968,9606.ENSP00000310668,9606.ENSP00000348056,9606.ENSP00000356448,9606.ENSP00000367721,9606.ENSP00000379182,9606.ENSP00000401470,9606.ENSP00000471191	NUP85,UBA2,TRIM28,NUP210,NUP133,SAE1,RANBP2,NUP205,NUP93,UBE2I,TPR,NUP160,RAE1,RANGAP1,NUP62
GO:1903201	Regulation of oxidative stress-induced cell death	15	67	0.38	0.0455	9606.ENSP00000246957,9606.ENSP00000270142,9606.ENSP00000276079,9606.ENSP00000284981,9606.ENSP00000328088,9606.ENSP00000344456,9606.ENSP00000346437,9606.ENSP00000349748,9606.ENSP00000355759,9606.ENSP00000362057,9606.ENSP00000363641,9606.ENSP00000365576,9606.ENSP00000384949,9606.ENSP00000418770,9606.ENSP00000426909	TRAP1,SOD1,NONO,APP,PAWR,CTNNB1,ATG7,SFPQ,PARP1,NOX1,TXN,UBQLN1,PYCR1,PARK7,GNB2L1
GO:0044419	Interspecies interaction between organisms	418	1899	0.37	3.58e-51	9606.ENSP00000044462,9606.ENSP00000052754,9606.ENSP00000054666,9606.ENSP00000209875,9606.ENSP00000215754,9606.ENSP00000215832,9606.ENSP00000216129,9606.ENSP00000216190,9606.ENSP00000216218,9606.ENSP00000216297,9606.ENSP00000216336,9606.ENSP00000216455,9606.ENSP00000216479,9606.ENSP00000221566,9606.ENSP00000222247,9606.ENSP00000223321,9606.ENSP00000223642,9606.ENSP00000224181,9606.ENSP00000225430,…	PSMA4,DCN,VAMP3,CBX5,MIF,MAPK1,TTLL12,EIF3D,ST13,SUPT16H,CTSG,PSMA3,AHSA1,SGTA,RPL18A,PSMA2,C5,C8G,RPL19,C1QBP,SYNGR2,NFKB1,GAPDH,MAPK14,RPS12,SNX3,HRG,MSH6,ENO1,VPS4B,TARDBP,ZC3HAV1,NUP85,THOC2,C3,CANX,PYCARD,VIL1,COPB1,AP1M2,RPS16,TSG101,APOE,TRIM28,EIF3G,LGALS3,TRIM21,NUP210,CRP,LAMTOR5,CFHR5,PSMB7,RPL35,ITGAV,NUP133,SNW1,IPO5,USP14,KPNA3,C14orf166,CDH1,PSMB1,TRAM1,TCEB2,DNAJA3,COTL1,RPL8,PRDX…
GO:1901575	Organic substance catabolic process	389	1750	0.37	3.91e-48	9606.ENSP00000044462,9606.ENSP00000052754,9606.ENSP00000157812,9606.ENSP00000161559,9606.ENSP00000168216,9606.ENSP00000196371,9606.ENSP00000205402,9606.ENSP00000210313,9606.ENSP00000215071,9606.ENSP00000216455,9606.ENSP00000216780,9606.ENSP00000216802,9606.ENSP00000217426,9606.ENSP00000217958,9606.ENSP00000219313,9606.ENSP00000220166,9606.ENSP00000220764,9606.ENSP00000220849,9606.ENSP00000221418,…	PSMA4,DCN,PSMC4,CEACAM1,HSD17B10,OXCT1,DLD,PSMD5,PSMD8,PSMA3,PCK2,PSME2,AHCY,PSMD10,PSMD7,CTSH,DECR1,EIF3E,ECH1,SGTA,RPL18A,PSMA2,SEC61B,RPL19,CCDC47,ALDOC,CTSC,PRPF19,APOC3,LTA4H,GAPDH,USP5,TPI1,RPS12,SKIV2L2,ENO1,CTSD,VPS4B,PLBD1,ACADS,C19orf43,RNF114,GOT2,NT5C,CLPP,RPS16,TSG101,APOE,LSM7,VPS25,HRSP12,UGGT1,KIAA0368,PSMB7,RPL35,HINT2,PSMC1,HEXB,UBE2K,PSMA6,USP14,PSMD11,ALDH2,FAF2,PSMB1,RPL8,SAM…
GO:0044248	Cellular catabolic process	387	1758	0.37	5.43e-47	9606.ENSP00000037243,9606.ENSP00000044462,9606.ENSP00000052754,9606.ENSP00000157812,9606.ENSP00000168216,9606.ENSP00000179259,9606.ENSP00000196371,9606.ENSP00000200181,9606.ENSP00000205402,9606.ENSP00000210313,9606.ENSP00000215071,9606.ENSP00000216034,9606.ENSP00000216455,9606.ENSP00000216780,9606.ENSP00000216802,9606.ENSP00000217244,9606.ENSP00000217426,9606.ENSP00000217958,9606.ENSP00000219313,…	GABARAPL2,PSMA4,DCN,PSMC4,HSD17B10,C12orf5,OXCT1,ITGB4,DLD,PSMD5,PSMD8,TOMM22,PSMA3,PCK2,PSME2,CSNK2A1,AHCY,PSMD10,PSMD7,CTSH,DECR1,EIF3E,ECH1,SGTA,RPL18A,PON2,FIS1,PSMA2,SEC61B,RPL19,CCDC47,CTSC,PRPF19,APOC3,LTA4H,USP5,TPI1,RPS12,SKIV2L2,VPS4B,ACADS,C19orf43,RNF114,GOT2,NT5C,CLPP,RPS16,TSG101,LSM7,VPS25,HRSP12,UGGT1,KIAA0368,PSMB7,RPL35,PSMC1,HEXB,UBE2K,PSMA6,USP14,PSMD11,FAF2,PSMB1,RPL8,PRDX1,S…
GO:0016070	RNA metabolic process	350	1584	0.37	3.1e-42	9606.ENSP00000012443,9606.ENSP00000168216,9606.ENSP00000215793,9606.ENSP00000215829,9606.ENSP00000216038,9606.ENSP00000216252,9606.ENSP00000216297,9606.ENSP00000216714,9606.ENSP00000216832,9606.ENSP00000217109,9606.ENSP00000220592,9606.ENSP00000220849,9606.ENSP00000221419,9606.ENSP00000221801,9606.ENSP00000222247,9606.ENSP00000223029,9606.ENSP00000225430,9606.ENSP00000225698,9606.ENSP00000226574,…	PPP5C,HSD17B10,SF3A1,SNRPD3,RTCB,PHF5A,SUPT16H,APEX1,PNN,CSTF1,AGO2,EIF3E,HNRNPL,FBL,RPL18A,AIMP2,RPL19,C1QBP,NFKB1,PRPF19,SART3,SRSF9,RPS12,BYSL,SKIV2L2,RRP9,SARS,WDR77,CPSF3,TARDBP,C19orf43,SNRPA,SRSF6,HIST1H4F,THOC2,SNRPB2,RALY,SBDS,LSM8,RPS16,LSM7,TRIM28,RBM39,PPP1R1B,FUS,SNRPA1,LGALS3,HRSP12,NARS,MRPL44,TBRG4,SRSF1,RPL35,RTCA,SNW1,C14orf166,AARS,RBM25,MARS,TCEB2,RPL8,ACIN1,SAMHD1,MAPK3,DDX18…
GO:0046903	Secretion	242	1097	0.37	4.35e-28	9606.ENSP00000000412,9606.ENSP00000005257,9606.ENSP00000054666,9606.ENSP00000161559,9606.ENSP00000199764,9606.ENSP00000215754,9606.ENSP00000215832,9606.ENSP00000216181,9606.ENSP00000216336,9606.ENSP00000217971,9606.ENSP00000219022,9606.ENSP00000219313,9606.ENSP00000220166,9606.ENSP00000222968,9606.ENSP00000223321,9606.ENSP00000225777,9606.ENSP00000226253,9606.ENSP00000226574,9606.ENSP00000227266,…	M6PR,RALA,VAMP3,CEACAM1,CEACAM6,MIF,MAPK1,MYH9,CTSG,PGRMC1,OLFM4,PSMD7,CTSH,PDAP1,PSMA2,SYNGR2,ALDOC,NFKB1,CTSC,MLEC,LTA4H,MAPK14,HRG,UMPS,CTSD,APOA1,CD97,GOT2,C3,CANX,PYCARD,TUBA4A,COPB1,TSG101,ACLY,PPFIA1,LGALS3,CAB39,PSMB7,GGH,DNAJC13,ITGAV,HEXB,PSMD11,ERP29,FAF2,PSMB1,ARFGEF1,COTL1,ERP44,SLC9A3R1,LGALS3BP,NAPA,AGA,PSMD3,CAD,RAB10,KNG1,RAB7A,SRP14,IQGAP1,PFKL,SOD1,PSMA5,DYNC1LI1,LIN7C,LAMTOR1,…
GO:0050778	Positive regulation of immune response	133	607	0.37	9.67e-15	9606.ENSP00000044462,9606.ENSP00000157812,9606.ENSP00000210313,9606.ENSP00000215071,9606.ENSP00000215754,9606.ENSP00000215832,9606.ENSP00000216336,9606.ENSP00000216455,9606.ENSP00000216802,9606.ENSP00000217958,9606.ENSP00000219313,9606.ENSP00000220003,9606.ENSP00000223321,9606.ENSP00000223642,9606.ENSP00000224181,9606.ENSP00000225698,9606.ENSP00000226279,9606.ENSP00000226574,9606.ENSP00000228825,…	PSMA4,PSMC4,PSMD5,PSMD8,MIF,MAPK1,CTSG,PSMA3,PSME2,PSMD10,PSMD7,CSK,PSMA2,C5,C8G,C1QBP,CD38,NFKB1,ARPC3,MAPK14,HRG,MSH2,C3,PYCARD,CRP,KRAS,CFHR5,PSMB7,PSMC1,UBE2K,PSMA6,PSMD11,PSMB1,ARPC1A,MAPK3,ACTR3,PSMD3,C1RL,PSMA5,NONO,RPS3,PSMB4,PSME3,ARPC5,HMGB2,CRK,PSMD1,PSMD2,PSMC5,RBM14,PRKDC,KHDRBS1,PAK2,UBE2N,STX4,C7,KARS,CFD,LAMP1,RFTN1,HSP90AA1,PSMF1,PTK2,PSPC1,HMGB1,DDX21,CRKL,PSMD12,RAC1,STOML2,SFP…
GO:0022411	Cellular component disassembly	88	395	0.37	4.64e-10	9606.ENSP00000037243,9606.ENSP00000081029,9606.ENSP00000216297,9606.ENSP00000216336,9606.ENSP00000219070,9606.ENSP00000223136,9606.ENSP00000238497,9606.ENSP00000245539,9606.ENSP00000246533,9606.ENSP00000248444,9606.ENSP00000250378,9606.ENSP00000251968,9606.ENSP00000253099,9606.ENSP00000253237,9606.ENSP00000254630,9606.ENSP00000256441,9606.ENSP00000258341,9606.ENSP00000258383,9606.ENSP00000258455,…	GABARAPL2,MRPS35,SUPT16H,CTSG,MMP2,FIS1,VPS4B,MRPS7,CAPNS1,VIL1,CMA1,TSG101,MRPL4,GRWD1,PTCD3,MRPS36,LAMC1,MRPL44,MRPS9,ACIN1,NAPA,SH3GL1,CISD2,MRPL49,KPNB1,APEH,HMGB2,ABCE1,TWF2,MRPL39,KIF5B,PLG,GAK,MRPL1,PPP1CA,BSG,MRPL12,CAV1,TPSAB1,CTNNB1,HMGB1,ATG7,VCP,ETF1,MRPL37,MRPL24,DCTN1,VTA1,DAP3,CTSS,MCTS1,SET,C1QC,FLOT1,UBQLN1,DFFA,SQSTM1,MRPL19,CDK1,PAFAH1B1,CHMP1A,NSF,MRPS6,SMARCD2,GSPT1,CD44,LAMP…
GO:0032386	Regulation of intracellular transport	80	360	0.37	4.08e-09	9606.ENSP00000215832,9606.ENSP00000217289,9606.ENSP00000219169,9606.ENSP00000223136,9606.ENSP00000229795,9606.ENSP00000230085,9606.ENSP00000240185,9606.ENSP00000245838,9606.ENSP00000249071,9606.ENSP00000253024,9606.ENSP00000260818,9606.ENSP00000261574,9606.ENSP00000261769,9606.ENSP00000263025,9606.ENSP00000263277,9606.ENSP00000264335,9606.ENSP00000264670,9606.ENSP00000265351,9606.ENSP00000266679,…	MAPK1,FERMT1,NUTF2,FIS1,MAPK14,SNX3,TARDBP,THOC2,RAC2,TRIM28,DNAJC13,IPO5,CDH1,MAPK3,EHD2,YWHAE,NSUN2,XPO5,CPSF6,SAE1,STOM,MAP1B,MAP2K1,YWHAG,KIF5B,KHDRBS1,BID,HCLS1,NPEPPS,PPM1A,LAMP1,RAB11B,HUWE1,SFN,PPP1CC,ANP32B,ANXA2,PRKAA1,UBE2D3,MYO1C,MSN,EZR,TPR,DHX9,BAG3,FLNA,SCP2,HSP90AB1,PTPN1,YWHAB,SRC,TXN,PDCD10,NUMA1,JUP,CDK1,YWHAZ,TM9SF4,CDC42,XPO1,NOLC1,SAR1B,RBM4,PPP1R12A,SCFD1,BCAP31,ARFIP1,UBE2…
GO:1904951	Positive regulation of establishment of protein localization	81	368	0.37	4.52e-09	9606.ENSP00000196371,9606.ENSP00000215754,9606.ENSP00000215832,9606.ENSP00000219169,9606.ENSP00000223136,9606.ENSP00000226279,9606.ENSP00000229239,9606.ENSP00000229795,9606.ENSP00000240185,9606.ENSP00000249071,9606.ENSP00000251968,9606.ENSP00000253024,9606.ENSP00000258091,9606.ENSP00000261574,9606.ENSP00000261769,9606.ENSP00000264335,9606.ENSP00000265729,9606.ENSP00000270225,9606.ENSP00000275603,…	OXCT1,MIF,MAPK1,NUTF2,FIS1,CD38,GAPDH,MAPK14,TARDBP,RAC2,TSG101,TRIM28,CCT7,IPO5,CDH1,YWHAE,SRI,SAE1,CCT6A,GLUD1,CCT5,APP,STOM,CCT8,CCT3,ARF6,VPS35,CCT2,PPID,YWHAG,KIF5B,TCP1,STX4,BID,HCLS1,NPEPPS,PPM1A,HUWE1,SFN,ANP32B,PRKAA1,RAC1,UBE2D3,ACSL3,CD2AP,MYO1C,HLA-DRB1,EZR,TPR,MPC2,BAG3,DKC1,FLNA,HSP90AB1,YWHAB,MCU,SRC,VPS28,PDCD10,JUP,CCT4,CDK1,YWHAZ,TM9SF4,SEC24A,CDC42,VSNL1,SAA1,SAR1B,BCAP31,UBE2L…
GO:0010498	Proteasomal protein catabolic process	76	345	0.37	1.56e-08	9606.ENSP00000044462,9606.ENSP00000157812,9606.ENSP00000210313,9606.ENSP00000215071,9606.ENSP00000216455,9606.ENSP00000216802,9606.ENSP00000217958,9606.ENSP00000219313,9606.ENSP00000221566,9606.ENSP00000223321,9606.ENSP00000223641,9606.ENSP00000225726,9606.ENSP00000227524,9606.ENSP00000259253,9606.ENSP00000259335,9606.ENSP00000259457,9606.ENSP00000261303,9606.ENSP00000261427,9606.ENSP00000261479,…	PSMA4,PSMC4,PSMD5,PSMD8,PSMA3,PSME2,PSMD10,PSMD7,SGTA,PSMA2,SEC61B,CCDC47,PRPF19,UGGT1,KIAA0368,PSMB7,PSMC1,UBE2K,PSMA6,PSMD11,FAF2,PSMB1,UFD1L,PSMD3,PCNP,PML,PSMA5,RPS27A,ERLIN2,UCHL1,PSMB4,PSME3,STT3B,HSP90B1,DDB1,PSMD1,PSMD2,PSMC5,TRIM25,NPLOC4,PSMF1,TRIM2,CTNNB1,UBQLN2,PSMD12,UBE2D3,RAD23B,PSMB10,VCP,CD2AP,PCBP2,PSMB5,BUB3,PSMD4,PSMA7,PSMB2,PSMB9,PSMB8,BAG6,UBQLN1,PSME1,CDK1,PLAA,HM13,PSMD14,…
GO:0010948	Negative regulation of cell cycle process	72	328	0.37	4.82e-08	9606.ENSP00000044462,9606.ENSP00000157812,9606.ENSP00000209875,9606.ENSP00000210313,9606.ENSP00000215071,9606.ENSP00000215754,9606.ENSP00000216455,9606.ENSP00000216802,9606.ENSP00000217958,9606.ENSP00000219313,9606.ENSP00000223321,9606.ENSP00000259457,9606.ENSP00000261303,9606.ENSP00000261479,9606.ENSP00000261712,9606.ENSP00000262193,9606.ENSP00000264639,9606.ENSP00000268058,9606.ENSP00000271308,…	PSMA4,PSMC4,CBX5,PSMD5,PSMD8,MIF,PSMA3,PSME2,PSMD10,PSMD7,PSMA2,PSMB7,PSMC1,PSMA6,PSMD11,PSMB1,PSMD3,PML,PSMA5,NUBP1,PSMB4,PSME3,NPM1,RAD21,PSMD1,PSMD2,PSMC5,RBM14,PRKDC,CALR,CNOT1,CARM1,MRE11A,CBX3,PSMF1,SFN,PSMD12,PSMB10,RRM2,PSMB5,TPR,BUB3,PSMD4,BRCC3,PSMA7,HSP90AB1,PSMB2,RBBP4,RPA2,PSMB9,PSMB8,PCNA,RBBP7,PSME1,FHL1,ZNF207,CDK1,PSMD14,PSMC2,PSMD13,PSMC6,PRMT1,NAA10,PSMD6,RPL23,H2AFY,TNKS1BP1,C…
GO:0009895	Negative regulation of catabolic process	70	316	0.37	5.8e-08	9606.ENSP00000003100,9606.ENSP00000037243,9606.ENSP00000179259,9606.ENSP00000217244,9606.ENSP00000221566,9606.ENSP00000227667,9606.ENSP00000228251,9606.ENSP00000229795,9606.ENSP00000230085,9606.ENSP00000240185,9606.ENSP00000254108,9606.ENSP00000260665,9606.ENSP00000261601,9606.ENSP00000264670,9606.ENSP00000268058,9606.ENSP00000283179,9606.ENSP00000299138,9606.ENSP00000300231,9606.ENSP00000302768,…	CYP51A1,GABARAPL2,C12orf5,CSNK2A1,SGTA,APOC3,YBX3,MAPK14,SNX3,TARDBP,FUS,LRPPRC,USP14,NSUN2,PML,HNRNPU,VPS35,MAP1A,PAIP1,SF3B3,CCAR2,PABPC1,HNRNPD,HNRNPA0,CHMP4A,LARP1,PSMF1,RPS7,PTK2,USP7,ANXA2,PRKAA1,ATG7,DDRGK1,THRAP3,ATP2B4,UCHL5,DHX9,APOA2,DKC1,SYNCRIP,FLNA,RPL5,FMR1,HSP90AB1,CTSA,YBX1,RPL11,BAG6,DFFA,GIPC1,CST3,ROCK1,ELAVL1,SLC25A12,SCFD1,FBP1,GOLGA2,EIF4G1,PARK7,RPL23,EIF4G2,CDK5RAP3,SLIRP…
GO:2000027	Regulation of animal organ morphogenesis	57	257	0.37	1.55e-06	9606.ENSP00000044462,9606.ENSP00000157812,9606.ENSP00000161559,9606.ENSP00000210313,9606.ENSP00000215071,9606.ENSP00000216455,9606.ENSP00000216802,9606.ENSP00000217958,9606.ENSP00000219313,9606.ENSP00000223321,9606.ENSP00000244020,9606.ENSP00000259457,9606.ENSP00000261303,9606.ENSP00000261479,9606.ENSP00000261712,9606.ENSP00000262193,9606.ENSP00000264639,9606.ENSP00000268058,9606.ENSP00000271308,…	PSMA4,PSMC4,CEACAM1,PSMD5,PSMD8,PSMA3,PSME2,PSMD10,PSMD7,PSMA2,SRSF6,PSMB7,PSMC1,PSMA6,PSMD11,PSMB1,PSMD3,PML,PSMA5,PSMB4,AP2M1,PSME3,PSMD1,PSMD2,PSMC5,CARM1,LIMS2,AP2A2,PSMF1,CTNNB1,PSMD12,RAC1,PSMB10,STAT1,PSMB5,PSMD4,PSMA7,PSMB2,PSMB9,PSMB8,PSME1,CDC42,PSMD14,PSMC2,PSMD13,RHOA,PSMC6,PSMD6,POR,SEC24B,PSMD9,PHB2,NACA,CLTC,PSMC3,AP2B1,PSMB3
GO:0006997	Nucleus organization	29	132	0.37	0.0018	9606.ENSP00000238497,9606.ENSP00000240185,9606.ENSP00000261396,9606.ENSP00000268058,9606.ENSP00000285968,9606.ENSP00000296503,9606.ENSP00000310275,9606.ENSP00000310668,9606.ENSP00000321266,9606.ENSP00000324205,9606.ENSP00000324804,9606.ENSP00000325074,9606.ENSP00000346725,9606.ENSP00000354791,9606.ENSP00000356448,9606.ENSP00000357283,9606.ENSP00000360034,9606.ENSP00000361845,9606.ENSP00000362931,…	VPS4B,TARDBP,NUP133,PML,NUP205,HMGB2,BANF1,NUP93,PITPNB,CHMP4A,PPP2R1A,PPP2R2A,PES1,DCTN1,TPR,LMNA,SERBP1,ZMPSTE24,SRPK1,SF1,NUMA1,CDK1,PAFAH1B1,CHMP1A,SUN1,NOLC1,PRKCA,NSFL1C,RPS19
GO:0007160	Cell-matrix adhesion	28	127	0.37	0.0022	9606.ENSP00000200181,9606.ENSP00000216286,9606.ENSP00000217289,9606.ENSP00000253925,9606.ENSP00000261023,9606.ENSP00000264187,9606.ENSP00000270233,9606.ENSP00000279227,9606.ENSP00000296585,9606.ENSP00000304408,9606.ENSP00000324422,9606.ENSP00000342858,9606.ENSP00000344456,9606.ENSP00000346839,9606.ENSP00000348461,9606.ENSP00000360293,9606.ENSP00000362680,9606.ENSP00000364585,9606.ENSP00000365745,…	ITGB4,NID2,FERMT1,PPFIA1,ITGAV,NID1,BCAM,FERMT3,ITGA2,COL3A1,ZYX,FERMT2,CTNNB1,FN1,RAC1,SORBS1,SRC,RCC2,CTTN,EMILIN1,ACTN1,ITGB1,ILK,ITGA6,CD44,RHOA,CDK5,ITGA7
GO:0010822	Positive regulation of mitochondrion organization	27	121	0.37	0.0024	9606.ENSP00000052754,9606.ENSP00000223136,9606.ENSP00000225174,9606.ENSP00000247470,9606.ENSP00000249071,9606.ENSP00000264335,9606.ENSP00000270225,9606.ENSP00000290573,9606.ENSP00000299138,9606.ENSP00000306330,9606.ENSP00000318822,9606.ENSP00000320324,9606.ENSP00000340648,9606.ENSP00000340989,9606.ENSP00000346148,9606.ENSP00000349722,9606.ENSP00000361930,9606.ENSP00000362144,9606.ENSP00000368022,…	DCN,FIS1,PPIF,PYCARD,RAC2,YWHAE,SAE1,HK2,VPS35,YWHAG,BID,NPEPPS,HUWE1,SFN,PRKAA1,UBE2D3,YWHAB,MCU,OPTN,YWHAZ,UBE2L3,PARK7,FAM162A,DNM1L,PDCD5,NMT1,SH3GLB1
GO:0042542	Response to hydrogen peroxide	26	119	0.37	0.004	9606.ENSP00000012443,9606.ENSP00000216714,9606.ENSP00000225174,9606.ENSP00000270142,9606.ENSP00000278572,9606.ENSP00000287295,9606.ENSP00000295834,9606.ENSP00000298510,9606.ENSP00000300574,9606.ENSP00000307940,9606.ENSP00000319788,9606.ENSP00000334373,9606.ENSP00000346148,9606.ENSP00000354394,9606.ENSP00000362680,9606.ENSP00000365730,9606.ENSP00000368458,9606.ENSP00000370542,9606.ENSP00000373620,…	PPP5C,APEX1,PPIF,SOD1,RPS3,AIFM1,FABP1,PRDX3,CRK,EEF2,NQO1,KPNA4,PRKAA1,STAT1,SRC,STK24,PCNA,SDC1,HSPD1,PDCD10,CDK1,CST3,PARK7,HDAC2,CRYAB,LDHA
GO:0060964	Regulation of gene silencing by mirna	25	114	0.37	0.0049	9606.ENSP00000220592,9606.ENSP00000244537,9606.ENSP00000245544,9606.ENSP00000254508,9606.ENSP00000261396,9606.ENSP00000283195,9606.ENSP00000285968,9606.ENSP00000302486,9606.ENSP00000310668,9606.ENSP00000333277,9606.ENSP00000350170,9606.ENSP00000352252,9606.ENSP00000356448,9606.ENSP00000356520,9606.ENSP00000359506,9606.ENSP00000361845,9606.ENSP00000367721,9606.ENSP00000370625,9606.ENSP00000373312,…	AGO2,HIST1H4F,NUP85,NUP210,NUP133,RANBP2,NUP205,MAP2K1,NUP93,HIST2H3D,FXR1,HIST1H3J,TPR,DHX9,FMR1,ZMPSTE24,NUP160,POLR2B,SEC13,RAE1,ELAVL1,POLR2H,EIF4G1,NUP62,POLR2A
GO:2001243	Negative regulation of intrinsic apoptotic signaling pathway	22	99	0.37	0.0088	9606.ENSP00000215754,9606.ENSP00000225174,9606.ENSP00000228251,9606.ENSP00000234590,9606.ENSP00000246957,9606.ENSP00000263774,9606.ENSP00000276079,9606.ENSP00000310670,9606.ENSP00000317992,9606.ENSP00000318822,9606.ENSP00000360683,9606.ENSP00000360688,9606.ENSP00000361635,9606.ENSP00000362649,9606.ENSP00000362680,9606.ENSP00000369127,9606.ENSP00000382840,9606.ENSP00000398632,9606.ENSP00000418770,…	MIF,PPIF,YBX3,ENO1,TRAP1,NDUFS3,NONO,CCAR2,NOC2L,BID,PTPN1,TXNDC12,VDAC2,HDAC1,SRC,DNAJA1,DDX3X,CD44,PARK7,NDUFA13,TPT1,HYOU1
GO:0006625	Protein targeting to peroxisome	15	68	0.37	0.0498	9606.ENSP00000221418,9606.ENSP00000264167,9606.ENSP00000265986,9606.ENSP00000272317,9606.ENSP00000293217,9606.ENSP00000316357,9606.ENSP00000333664,9606.ENSP00000349722,9606.ENSP00000360569,9606.ENSP00000363614,9606.ENSP00000371517,9606.ENSP00000388107,9606.ENSP00000390265,9606.ENSP00000420914,9606.ENSP00000431049	ECH1,AGPS,IDE,RPS27A,ACOX1,USP9X,ACAA1,UBE2D3,SCP2,HMGCL,AMACR,UBA52,IDH1,HSD17B4,GSTK1
GO:0010467	Gene expression	445	2056	0.36	2.96e-53	9606.ENSP00000012443,9606.ENSP00000081029,9606.ENSP00000168216,9606.ENSP00000215793,9606.ENSP00000215829,9606.ENSP00000216038,9606.ENSP00000216044,9606.ENSP00000216190,9606.ENSP00000216252,9606.ENSP00000216297,9606.ENSP00000216336,9606.ENSP00000216554,9606.ENSP00000216832,9606.ENSP00000217109,9606.ENSP00000220166,9606.ENSP00000220592,9606.ENSP00000220849,9606.ENSP00000221419,9606.ENSP00000221801,…	PPP5C,MRPS35,HSD17B10,SF3A1,SNRPD3,RTCB,GTPBP1,EIF3D,PHF5A,SUPT16H,CTSG,EIF5,PNN,CSTF1,CTSH,AGO2,EIF3E,HNRNPL,FBL,RPL18A,AIMP2,RPL19,C1QBP,DRG2,NFKB1,PRPF19,SART3,SRSF9,RPS12,BYSL,SKIV2L2,RRP9,SARS,WDR77,CPSF3,TARDBP,SNRPA,SRSF6,HIST1H4F,MRPS7,NUP85,THOC2,SNRPB2,RALY,SBDS,PYCARD,EIF3K,PMPCB,LSM8,CMA1,RPS16,APOE,LSM7,TRIM28,EIF2S3,MRPL4,EIF3G,RBM39,PPP1R1B,FUS,SNRPA1,LGALS3,NUP210,PTCD3,EIF2S1,MRP…
GO:0044283	Small molecule biosynthetic process	124	572	0.36	1.87e-13	9606.ENSP00000003100,9606.ENSP00000052754,9606.ENSP00000215754,9606.ENSP00000215882,9606.ENSP00000216605,9606.ENSP00000216780,9606.ENSP00000219302,9606.ENSP00000220966,9606.ENSP00000223127,9606.ENSP00000225573,9606.ENSP00000225665,9606.ENSP00000226253,9606.ENSP00000228740,9606.ENSP00000229239,9606.ENSP00000229270,9606.ENSP00000232607,9606.ENSP00000234454,9606.ENSP00000234590,9606.ENSP00000236850,…	CYP51A1,DCN,MIF,SLC25A1,MTHFD1,PCK2,NME3,PYCRL,PLOD3,PNPO,SLC25A11,ALDOC,LTA4H,GAPDH,TPI1,UMPS,SPR,ENO1,APOA1,ATIC,PTGIS,GOT2,NT5C,ALDH1A2,ACSS2,ACLY,PTPLAD1,COQ9,SAMHD1,OSBP,CAD,VCAN,ACAT1,SORD,ENOPH1,GLUD1,HSD17B12,QDPR,ACAA2,ADK,COQ5,ACSM3,PDXK,HPRT1,PCBD1,CBR4,HINT1,GPD2,CSPG4,ACSS1,GLS,SHMT1,UGDH,PKM,TALDO1,IMPDH2,DCTPP1,BCAT2,PRKAG1,MDH2,BGN,ADI1,SHMT2,NME1,NUDT4,UGP2,NT5C2,LBR,PYCR2,PTGES2…
GO:1903827	Regulation of cellular protein localization	123	568	0.36	2.52e-13	9606.ENSP00000215832,9606.ENSP00000217289,9606.ENSP00000219169,9606.ENSP00000220003,9606.ENSP00000223136,9606.ENSP00000229795,9606.ENSP00000230085,9606.ENSP00000230340,9606.ENSP00000240185,9606.ENSP00000245838,9606.ENSP00000248444,9606.ENSP00000249071,9606.ENSP00000251968,9606.ENSP00000253024,9606.ENSP00000253925,9606.ENSP00000254301,9606.ENSP00000256644,9606.ENSP00000258091,9606.ENSP00000261574,…	MAPK1,FERMT1,NUTF2,CSK,FIS1,MAPK14,SNX3,BYSL,TARDBP,THOC2,VIL1,RAC2,TSG101,TRIM28,PPFIA1,LGALS3,LAMTOR5,CCT7,IPO5,CDH1,YWHAE,NSUN2,XPO5,PML,IQGAP1,SAE1,RALB,CCT6A,CCT5,GPD1L,APP,STOM,CCT8,APPL1,AP2M1,CCT3,DTX3L,ARF6,VPS35,CCT2,MAP1A,YWHAG,KIF5B,TCP1,STX4,ROCK2,BID,LYPLA1,HCLS1,NPEPPS,PPM1A,RAB11B,HSP90AA1,PLS1,EPB41L2,HUWE1,SFN,TRIM29,CTNNB1,EPB41,ANP32B,PRKAA1,CRKL,DDRGK1,SPTBN1,SCRIB,UBE2D3,ACS…
GO:0097435	Supramolecular fiber organization	104	480	0.36	2.86e-11	9606.ENSP00000070846,9606.ENSP00000223127,9606.ENSP00000228825,9606.ENSP00000245932,9606.ENSP00000246662,9606.ENSP00000248444,9606.ENSP00000249071,9606.ENSP00000251166,9606.ENSP00000259365,9606.ENSP00000262753,9606.ENSP00000262942,9606.ENSP00000263238,9606.ENSP00000263867,9606.ENSP00000264758,9606.ENSP00000266718,9606.ENSP00000284770,9606.ENSP00000284981,9606.ENSP00000290158,9606.ENSP00000292385,…	PKP2,PLOD3,ARPC3,VASP,KRT9,VIL1,RAC2,CORO7,TMOD1,POF1B,ARPC1A,ACTR3,CAPG,ADD1,LUM,PDLIM3,APP,KPNB1,DBN1,ARPC5,COL14A1,HSP90B1,TWF2,COL3A1,TMOD3,KRT2,HCLS1,SERPINF2,CRTAP,ZYX,MYO1D,FLII,PAWR,PLS1,DPYSL3,MYO1F,ANXA2,FMOD,SORBS2,SVIL,PLS3,ADD3,RAC1,SH3BP1,TPM1,CD2AP,MYO1C,DCTN1,KRT19,ACTA1,ENAH,EZR,LMOD1,CSRP1,SPTA1,TPM3,SLK,FLNA,MYO6,SORBS1,PDLIM1,HSP90AB1,CAP1,MCU,SRC,GSN,DES,MAPRE1,ABI1,CTTN,ACTR…
GO:0052547	Regulation of peptidase activity	97	449	0.36	1.89e-10	9606.ENSP00000215727,9606.ENSP00000216455,9606.ENSP00000216802,9606.ENSP00000217244,9606.ENSP00000220166,9606.ENSP00000223061,9606.ENSP00000223136,9606.ENSP00000223642,9606.ENSP00000227266,9606.ENSP00000229239,9606.ENSP00000229795,9606.ENSP00000232003,9606.ENSP00000233893,9606.ENSP00000236671,9606.ENSP00000245907,9606.ENSP00000247470,9606.ENSP00000248444,9606.ENSP00000254722,9606.ENSP00000256644,…	SERPIND1,PSMA3,PSME2,CSNK2A1,CTSH,PCOLCE,FIS1,C5,CTSC,GAPDH,MAPK14,HRG,HSPE1,CTSD,C3,PYCARD,VIL1,SERPINF1,LAMTOR5,PEBP1,USP14,DNAJA3,MAPK3,YWHAE,PDCD6,KNG1,AMBP,PRDX5,PML,ARL6IP5,ITIH1,RPS3,APP,AIFM1,CSTB,PSME3,COL6A3,FABP1,PRDX3,ARL6IP1,CYCS,PAK2,ROCK2,BID,SERPINF2,KARS,FBLN1,PSMF1,CAV1,SFN,SERPINB4,HMGB1,ANP32B,ANXA2,DDRGK1,FN1,ITIH2,VCP,UCHL5,IFI16,ECM1,HDAC1,SRC,GSN,PSMB9,PSMB8,RPS6KA3,SERPIN…
GO:0006979	Response to oxidative stress	84	393	0.36	7.02e-09	9606.ENSP00000012443,9606.ENSP00000184266,9606.ENSP00000215832,9606.ENSP00000216714,9606.ENSP00000216951,9606.ENSP00000219070,9606.ENSP00000221130,9606.ENSP00000222572,9606.ENSP00000225174,9606.ENSP00000226279,9606.ENSP00000229416,9606.ENSP00000252486,9606.ENSP00000256383,9606.ENSP00000262746,9606.ENSP00000263025,9606.ENSP00000265462,9606.ENSP00000267257,9606.ENSP00000268058,9606.ENSP00000270142,…	PPP5C,NDUFB4,MAPK1,APEX1,GSS,MMP2,GSR,PON2,PPIF,CD38,GCLC,APOE,EIF2S1,PRDX1,MAPK3,PRDX5,PXN,PML,SOD1,ARL6IP5,RPS3,APP,AIFM1,FABP1,PRDX3,CRK,CYCS,EEF2,HNRNPD,NDUFS8,STX4,PRKRA,NQO1,HNRNPM,NDUFA12,KPNA4,PRDX6,PYCR2,PRKAA1,TPM1,LONP1,STAT1,PTGS1,PSMB5,PARP1,NCF2,PDLIM1,STAU1,ADPRHL2,SRC,TXN,STK24,NUDT2,PCNA,AKR1C3,PSIP1,SDC1,SOD3,HSPD1,DNM2,GPX2,PDCD10,DPEP1,NME1-NME2,SIN3A,CDK1,ERO1L,MGST1,CST3,GST…
GO:0031349	Positive regulation of defense response	79	367	0.36	1.77e-08	9606.ENSP00000044462,9606.ENSP00000157812,9606.ENSP00000210313,9606.ENSP00000215071,9606.ENSP00000216455,9606.ENSP00000216802,9606.ENSP00000217958,9606.ENSP00000219313,9606.ENSP00000223321,9606.ENSP00000226574,9606.ENSP00000227266,9606.ENSP00000242351,9606.ENSP00000245907,9606.ENSP00000247470,9606.ENSP00000256078,9606.ENSP00000259457,9606.ENSP00000261303,9606.ENSP00000261427,9606.ENSP00000261479,…	PSMA4,PSMC4,PSMD5,PSMD8,PSMA3,PSME2,PSMD10,PSMD7,PSMA2,NFKB1,CTSC,ZC3HAV1,C3,PYCARD,KRAS,PSMB7,PSMC1,UBE2K,PSMA6,PSMD11,PSMB1,MAPK3,PSMD3,PSMA5,NONO,PDCD4,APPL1,PSMB4,PSME3,HMGB2,ITGA2,IL16,PSMD1,PSMD2,PSMC5,RBM14,PRKDC,PAK2,KARS,LAMP1,PSMF1,PSPC1,HMGB1,PSMD12,SFPQ,PSMB10,XRCC6,MATR3,PSMB5,TGM2,CD47,DHX9,IFI16,PSMD4,HMGB3,PSMA7,PSMB2,SRC,KPNA6,PSMB9,PSMB8,OPTN,PSME1,HSPD1,XRCC5,AP1G1,SIN3A,DDT,PS…
GO:1902903	Regulation of supramolecular fiber organization	79	368	0.36	1.96e-08	9606.ENSP00000001008,9606.ENSP00000228825,9606.ENSP00000236850,9606.ENSP00000245932,9606.ENSP00000247470,9606.ENSP00000248444,9606.ENSP00000252486,9606.ENSP00000253925,9606.ENSP00000259365,9606.ENSP00000262215,9606.ENSP00000262428,9606.ENSP00000262942,9606.ENSP00000263168,9606.ENSP00000263238,9606.ENSP00000263867,9606.ENSP00000264071,9606.ENSP00000264758,9606.ENSP00000267257,9606.ENSP00000278572,…	FKBP4,ARPC3,APOA1,VASP,PYCARD,VIL1,APOE,PPFIA1,TMOD1,ARFGEF1,COTL1,ARPC1A,CAPZA1,ACTR3,CAPG,TUBB4A,ADD1,PXN,RPS3,APP,RHOC,DBN1,ARPC5,MAP1B,ARF6,MAP1A,TWF2,SYNPO2,TMOD3,PAK2,ROCK2,HCLS1,SERPINF2,DRG1,TBCD,ADD3,RAC1,SPTBN1,SH3BP1,GMFB,TPM1,MYO1C,DCTN1,CD47,LMOD1,F11R,SPTA1,ARHGAP18,FLNA,SPTAN1,GSN,HSPG2,MAPRE1,CTTN,ACTR2,EMILIN1,GRB2,NUMA1,CORO1B,LIMA1,ROCK1,CDC42,CTNNA2,ARPC4,ARFIP1,RHOA,CAPZB,STM…
GO:0016055	Wnt signaling pathway	75	351	0.36	6.02e-08	9606.ENSP00000044462,9606.ENSP00000157812,9606.ENSP00000210313,9606.ENSP00000215071,9606.ENSP00000216455,9606.ENSP00000216802,9606.ENSP00000217244,9606.ENSP00000217958,9606.ENSP00000219313,9606.ENSP00000220592,9606.ENSP00000223321,9606.ENSP00000230085,9606.ENSP00000259457,9606.ENSP00000261303,9606.ENSP00000261479,9606.ENSP00000261712,9606.ENSP00000262193,9606.ENSP00000262494,9606.ENSP00000262613,…	PSMA4,PSMC4,PSMD5,PSMD8,PSMA3,PSME2,CSNK2A1,PSMD10,PSMD7,AGO2,PSMA2,SNX3,PSMB7,PSMC1,PSMA6,PSMD11,PSMB1,GNAO1,SLC9A3R1,NID1,PSMD3,WDR61,PSMA5,RPS27A,RAB5A,PSMB4,CALM3,AP2M1,PSME3,VPS35,DDB1,PSMD1,PSMD2,PSMC5,CCAR2,PPP1CA,AP2A2,PSMF1,CAV1,FERMT2,CTNNB1,PRKAA1,PSMD12,RAC1,PSMB10,PSMB5,PSMD4,PSMA7,PSMB2,VPS26A,PSMB9,PSMB8,CSNK2B,SDC1,PSME1,TGFB1I1,CTNND1,DDX3X,CDC42,PSMD14,UBA52,PSMC2,PSMD13,RHOA,PS…
GO:0071356	Cellular response to tumor necrosis factor	53	245	0.36	8.15e-06	9606.ENSP00000044462,9606.ENSP00000157812,9606.ENSP00000210313,9606.ENSP00000215071,9606.ENSP00000215832,9606.ENSP00000216455,9606.ENSP00000216802,9606.ENSP00000217958,9606.ENSP00000219313,9606.ENSP00000223321,9606.ENSP00000226574,9606.ENSP00000228251,9606.ENSP00000229795,9606.ENSP00000247470,9606.ENSP00000259457,9606.ENSP00000261303,9606.ENSP00000261479,9606.ENSP00000261712,9606.ENSP00000262193,…	PSMA4,PSMC4,PSMD5,PSMD8,MAPK1,PSMA3,PSME2,PSMD10,PSMD7,PSMA2,NFKB1,YBX3,MAPK14,PYCARD,PSMB7,PSMC1,PSMA6,PSMD11,PSMB1,MAPK3,PSMD3,PSMA5,RPS3,PSMB4,PSME3,PSMD1,PSMD2,PSMC5,KARS,PSMF1,PSMD12,PSMB10,STAT1,PSMB5,DHX9,PSMD4,PSMA7,ASS1,PSMB2,PSMB9,PSMB8,ASAH1,PSME1,ILK,PSMD14,PSMC2,PSMD13,PSMC6,PSMD6,PSMD9,PRPF8,PSMC3,PSMB3
GO:0043281	Regulation of cysteine-type endopeptidase activity involved in apoptotic process	47	216	0.36	2.95e-05	9606.ENSP00000217244,9606.ENSP00000220166,9606.ENSP00000223136,9606.ENSP00000233893,9606.ENSP00000236671,9606.ENSP00000247470,9606.ENSP00000248444,9606.ENSP00000256644,9606.ENSP00000262375,9606.ENSP00000264335,9606.ENSP00000264933,9606.ENSP00000265462,9606.ENSP00000268058,9606.ENSP00000273258,9606.ENSP00000278572,9606.ENSP00000284981,9606.ENSP00000287295,9606.ENSP00000295834,9606.ENSP00000298510,…	CSNK2A1,CTSH,FIS1,HSPE1,CTSD,PYCARD,VIL1,LAMTOR5,DNAJA3,YWHAE,PDCD6,PRDX5,PML,ARL6IP5,RPS3,APP,AIFM1,FABP1,PRDX3,ARL6IP1,CYCS,PAK2,BID,SFN,HMGB1,ANP32B,VCP,SRC,GSN,RPS6KA3,HSPD1,DPEP1,LGALS9,DDX3X,BCAP31,DIABLO,CD44,RHOA,PARK7,FAM162A,POR,NDUFA13,GNB2L1,CASP1,CRYAB,RPS6KA1,PDCD5
GO:0000302	Response to reactive oxygen species	43	198	0.36	8.03e-05	9606.ENSP00000012443,9606.ENSP00000215832,9606.ENSP00000216714,9606.ENSP00000219070,9606.ENSP00000225174,9606.ENSP00000252486,9606.ENSP00000262746,9606.ENSP00000263025,9606.ENSP00000265462,9606.ENSP00000267257,9606.ENSP00000270142,9606.ENSP00000278572,9606.ENSP00000287295,9606.ENSP00000295834,9606.ENSP00000298510,9606.ENSP00000300574,9606.ENSP00000307940,9606.ENSP00000313199,9606.ENSP00000319788,…	PPP5C,MAPK1,APEX1,MMP2,PPIF,APOE,PRDX1,MAPK3,PRDX5,PXN,SOD1,RPS3,AIFM1,FABP1,PRDX3,CRK,EEF2,HNRNPD,NQO1,KPNA4,PRKAA1,TPM1,STAT1,ADPRHL2,SRC,TXN,STK24,PCNA,AKR1C3,SDC1,SOD3,HSPD1,DNM2,PDCD10,DPEP1,CDK1,CST3,GSTP1,TRA2B,PARK7,HDAC2,CRYAB,LDHA
GO:0051054	Positive regulation of dna metabolic process	43	200	0.36	9.88e-05	9606.ENSP00000179259,9606.ENSP00000215832,9606.ENSP00000233146,9606.ENSP00000253024,9606.ENSP00000254108,9606.ENSP00000258091,9606.ENSP00000263025,9606.ENSP00000268058,9606.ENSP00000275603,9606.ENSP00000278572,9606.ENSP00000280326,9606.ENSP00000286788,9606.ENSP00000295688,9606.ENSP00000296161,9606.ENSP00000299300,9606.ENSP00000313199,9606.ENSP00000313420,9606.ENSP00000316176,9606.ENSP00000316357,…	C12orf5,MAPK1,MSH2,TRIM28,FUS,CCT7,MAPK3,PML,CCT6A,RPS3,CCT5,CCT8,CCT3,DTX3L,CCT2,HNRNPD,PRKDC,UBE2N,USP9X,TCP1,MRE11A,SMCHD1,HSP90AA1,HNRNPA1,USP7,CTNNB1,HMGB1,HNRNPA2B1,TFRC,FH,PARP1,DHX9,BRCC3,DKC1,HSP90AB1,SRC,ACTR2,RAD50,PCNA,XRCC5,CCT4,DDX39B,NUDT16
GO:0071346	Cellular response to interferon-gamma	35	161	0.36	0.00052	9606.ENSP00000054666,9606.ENSP00000229239,9606.ENSP00000254436,9606.ENSP00000263238,9606.ENSP00000268058,9606.ENSP00000307078,9606.ENSP00000309142,9606.ENSP00000317714,9606.ENSP00000323889,9606.ENSP00000324422,9606.ENSP00000352834,9606.ENSP00000353099,9606.ENSP00000354394,9606.ENSP00000355361,9606.ENSP00000355890,9606.ENSP00000358635,9606.ENSP00000359025,9606.ENSP00000361471,9606.ENSP00000362924,…	VAMP3,GAPDH,TRIM21,ACTR3,PML,KIF5B,PDE12,STX4,TRIM25,ZYX,MYO1C,HLA-DRB1,STAT1,CD47,EPRS,SYNCRIP,STXBP3,ASS1,GSN,HLA-C,ACTR2,HLA-DRA,LGALS9,HLA-A,CDC42,CD44,HLA-B,HLA-DPB1,STXBP2,FLNB,CASP1,VIM,B2M,MRC1,ACTG1
GO:0035967	Cellular response to topologically incorrect protein	32	148	0.36	0.0011	9606.ENSP00000247461,9606.ENSP00000256383,9606.ENSP00000259253,9606.ENSP00000263202,9606.ENSP00000264758,9606.ENSP00000281938,9606.ENSP00000290949,9606.ENSP00000297185,9606.ENSP00000299427,9606.ENSP00000299767,9606.ENSP00000307260,9606.ENSP00000316029,9606.ENSP00000320866,9606.ENSP00000349860,9606.ENSP00000351777,9606.ENSP00000354791,9606.ENSP00000357189,9606.ENSP00000357283,9606.ENSP00000358081,…	CANX,EIF2S1,UGGT1,UFD1L,ADD1,HSPB8,ATP6V0D1,HSPA9,TPP1,HSP90B1,TBL2,TLN1,CALR,GFPT1,VCP,DCTN1,HDGF,LMNA,BAG3,PTPN1,BAG6,OPTN,HSPD1,SEC31A,ERO1L,VAPB,SRPRB,HSPA8,CDK5RAP3,ASNA1,DNAJC3,HYOU1
GO:0001889	Liver development	28	129	0.36	0.0027	9606.ENSP00000216254,9606.ENSP00000216410,9606.ENSP00000216780,9606.ENSP00000249750,9606.ENSP00000256078,9606.ENSP00000264705,9606.ENSP00000265838,9606.ENSP00000281243,9606.ENSP00000296585,9606.ENSP00000298316,9606.ENSP00000313199,9606.ENSP00000319169,9606.ENSP00000320171,9606.ENSP00000357998,9606.ENSP00000358723,9606.ENSP00000361471,9606.ENSP00000361845,9606.ENSP00000363614,9606.ENSP00000365042,…	ACO2,GNPNAT1,PCK2,ALDH1A2,KRAS,CAD,ACAT1,QDPR,ITGA2,ARF6,HNRNPD,PRMT5,PKM,SEC63,RAP1A,ASS1,ZMPSTE24,HMGCL,CSNK2B,PCNA,DDX39B,MPST,PNPT1,RPL10,RPL30,RPS6KA1,PRKCSH,LSR
GO:0043280	Positive regulation of cysteine-type endopeptidase activity involved in apoptotic process	29	136	0.36	0.0027	9606.ENSP00000220166,9606.ENSP00000223136,9606.ENSP00000233893,9606.ENSP00000236671,9606.ENSP00000247470,9606.ENSP00000262375,9606.ENSP00000264933,9606.ENSP00000268058,9606.ENSP00000273258,9606.ENSP00000278572,9606.ENSP00000284981,9606.ENSP00000287295,9606.ENSP00000307786,9606.ENSP00000318822,9606.ENSP00000345347,9606.ENSP00000345848,9606.ENSP00000351777,9606.ENSP00000362924,9606.ENSP00000373620,…	CTSH,FIS1,HSPE1,CTSD,PYCARD,DNAJA3,PDCD6,PML,ARL6IP5,RPS3,APP,AIFM1,CYCS,BID,HMGB1,ANP32B,VCP,GSN,HSPD1,LGALS9,DDX3X,BCAP31,DIABLO,RHOA,FAM162A,NDUFA13,GNB2L1,CASP1,PDCD5
GO:1905477	Positive regulation of protein localization to membrane	28	129	0.36	0.0027	9606.ENSP00000223136,9606.ENSP00000248444,9606.ENSP00000254301,9606.ENSP00000264335,9606.ENSP00000286713,9606.ENSP00000298316,9606.ENSP00000306330,9606.ENSP00000307078,9606.ENSP00000317714,9606.ENSP00000318822,9606.ENSP00000336831,9606.ENSP00000340989,9606.ENSP00000349259,9606.ENSP00000350012,9606.ENSP00000350310,9606.ENSP00000352834,9606.ENSP00000356042,9606.ENSP00000360293,9606.ENSP00000361930,…	FIS1,VIL1,LGALS3,YWHAE,STOM,ARF6,YWHAG,KIF5B,STX4,BID,PLS1,SFN,SPTBN1,ACSL3,ATP2B4,MYO1C,EZR,SORBS1,YWHAB,SQSTM1,YWHAZ,ITGB1,AGR2,CDK5,GNB2L1,PDCD5,NMT1,AP2B1
GO:0098754	Detoxification	27	125	0.36	0.0037	9606.ENSP00000221130,9606.ENSP00000252486,9606.ENSP00000262746,9606.ENSP00000265462,9606.ENSP00000270142,9606.ENSP00000295834,9606.ENSP00000298510,9606.ENSP00000319788,9606.ENSP00000342026,9606.ENSP00000352584,9606.ENSP00000354612,9606.ENSP00000355377,9606.ENSP00000356864,9606.ENSP00000358727,9606.ENSP00000361140,9606.ENSP00000363641,9606.ENSP00000367992,9606.ENSP00000369586,9606.ENSP00000370750,…	GSR,APOE,PRDX1,PRDX5,SOD1,FABP1,PRDX3,NQO1,PRDX6,AKR1B10,PTGS1,AKR7A3,MGST3,GSTO1,AKR1A1,TXN,ESD,HBE1,RDH11,SOD3,GPX2,MGST1,GSTP1,PARK7,GSTK1,TXNRD1,FAM213A
GO:0043244	Regulation of protein-containing complex disassembly	26	121	0.36	0.0049	9606.ENSP00000248444,9606.ENSP00000259365,9606.ENSP00000263168,9606.ENSP00000263867,9606.ENSP00000264758,9606.ENSP00000296755,9606.ENSP00000300231,9606.ENSP00000303908,9606.ENSP00000308753,9606.ENSP00000336702,9606.ENSP00000348381,9606.ENSP00000349259,9606.ENSP00000350018,9606.ENSP00000353741,9606.ENSP00000356257,9606.ENSP00000357129,9606.ENSP00000361824,9606.ENSP00000361845,9606.ENSP00000362924,…	VIL1,TMOD1,CAPZA1,CAPG,ADD1,MAP1B,MAP1A,TWF2,TMOD3,EIF5A,ADD3,SPTBN1,SH3BP1,ETF1,LMOD1,SPTA1,SPTAN1,ZMPSTE24,GSN,LIMA1,GSPT1,CAPZB,CFL1,TWF1,SPTB,UPF1
GO:0030968	Endoplasmic reticulum unfolded protein response	23	106	0.36	0.0089	9606.ENSP00000247461,9606.ENSP00000256383,9606.ENSP00000264758,9606.ENSP00000290949,9606.ENSP00000299427,9606.ENSP00000299767,9606.ENSP00000307260,9606.ENSP00000316029,9606.ENSP00000320866,9606.ENSP00000349860,9606.ENSP00000351777,9606.ENSP00000354791,9606.ENSP00000357189,9606.ENSP00000357283,9606.ENSP00000360683,9606.ENSP00000378721,9606.ENSP00000379042,9606.ENSP00000417175,9606.ENSP00000418401,…	CANX,EIF2S1,ADD1,ATP6V0D1,TPP1,HSP90B1,TBL2,TLN1,CALR,GFPT1,VCP,DCTN1,HDGF,LMNA,PTPN1,SEC31A,ERO1L,VAPB,SRPRB,CDK5RAP3,ASNA1,DNAJC3,HYOU1
GO:0032508	DNA duplex unwinding	23	106	0.36	0.0089	9606.ENSP00000254719,9606.ENSP00000262105,9606.ENSP00000264156,9606.ENSP00000265056,9606.ENSP00000272317,9606.ENSP00000301764,9606.ENSP00000307288,9606.ENSP00000318297,9606.ENSP00000325863,9606.ENSP00000349508,9606.ENSP00000350708,9606.ENSP00000352257,9606.ENSP00000355759,9606.ENSP00000356520,9606.ENSP00000368100,9606.ENSP00000370745,9606.ENSP00000375978,9606.ENSP00000377681,9606.ENSP00000382840,…	RPA1,MCM4,MCM6,MCM2,RPS27A,DDB1,MCM7,RUVBL1,MRE11A,CHD4,RAD23B,XRCC6,PARP1,DHX9,RAD50,DDX1,XRCC5,G3BP1,DDX3X,UBA52,RECQL,SSBP1,RUVBL2
[truncated: 431 more rows]

## Sheet: MF
Table S3. Functional enrichment analysis of DAPs performed using GO terms (MF-Molecular Functions).
[truncated: 171 more rows]

[truncated: 4 more sheets: CC, KEGG, Reactome, WikiPath]
