# Supplementary material for: Proteomic and metabolomic signatures of rectal tumor discriminate patients with different responses to preoperative radiotherapy
Source: Front Oncol. 2024 Feb 12;14:1323961. doi: 10.3389/fonc.2024.1323961 (PMC10896604; doi:10.3389/fonc.2024.1323961)
Supplement: Supplementary file 14 [file Table_4.xlsx]

## Sheet: msea_qea_result
Table S4. Results of quantitative enrichment analysis of DAMs based on the SMPDB database.
SMPDB Pathways	Total Cmpd	Hits	Statistic Q	Expected Q	Raw p	Holm p	FDR
Warburg Effect	58	10	49.063	5.8824	2.3957e-08	1.9405e-06	1.9405e-06
Gluconeogenesis	35	6	52.732	5.8824	5.6229e-08	4.4984e-06	2.2773e-06
Transfer of Acetyl Groups into Mitochondria	22	2	73.493	5.8824	1.025e-07	8.0979e-06	2.7676e-06
Sphingolipid Metabolism	40	3	53.093	5.8824	3.0962e-07	2.4151e-05	6.1172e-06
Mitochondrial Electron Transport Chain	19	2	52.041	5.8824	3.776e-07	2.9075e-05	6.1172e-06
Citric Acid Cycle	32	3	61.394	5.8824	5.9487e-07	4.521e-05	8.0307e-06
Glycerolipid Metabolism	25	3	55.183	5.8824	8.1117e-07	6.0838e-05	9.3864e-06
Glycolysis	25	3	49.738	5.8824	9.9619e-07	7.3718e-05	1.0086e-05
Galactose Metabolism	38	8	38.922	5.8824	1.7133e-06	0.00012507	1.542e-05
Oxidation of Branched Chain Fatty Acids	26	5	39.978	5.8824	3.8386e-06	0.00027638	3.1092e-05
Mitochondrial Beta-Oxidation of Long Chain Saturated Fatty Acids	28	3	30.346	5.8824	4.4308e-06	0.00031459	3.2627e-05
Carnitine Synthesis	22	6	45.865	5.8824	8.7991e-06	0.00061593	5.9394e-05
Inositol Phosphate Metabolism	26	3	35.924	5.8824	2.3745e-05	0.0016384	0.00012841
Malate-Aspartate Shuttle	10	4	51.961	5.8824	2.4949e-05	0.0016965	0.00012841
Tyrosine Metabolism	72	6	44.055	5.8824	2.5164e-05	0.0016965	0.00012841
Aspartate Metabolism	35	7	43.016	5.8824	2.5365e-05	0.0016965	0.00012841
Amino Sugar Metabolism	33	7	35.265	5.8824	3.8391e-05	0.0024954	0.00018292
Pyruvate Metabolism	48	4	35.263	5.8824	4.7909e-05	0.0030662	0.00021559
Glycine and Serine Metabolism	59	7	34.299	5.8824	6.288e-05	0.0039614	0.00023557
Phospholipid Biosynthesis	29	1	64.056	5.8824	6.6396e-05	0.0041166	0.00023557
Glycerol Phosphate Shuttle	11	1	64.056	5.8824	6.6396e-05	0.0041166	0.00023557
De Novo Triacylglycerol Biosynthesis	9	1	64.056	5.8824	6.6396e-05	0.0041166	0.00023557
Lactose Degradation	9	2	56.1	5.8824	6.6889e-05	0.0041166	0.00023557
Glucose-Alanine Cycle	13	3	48.617	5.8824	7.5431e-05	0.004375	0.00025458
Nucleotide Sugars Metabolism	20	3	29.318	5.8824	8.6209e-05	0.0049139	0.00027932
Nicotinate and Nicotinamide Metabolism	37	5	36.301	5.8824	0.00011268	0.0063101	0.00035104
Cardiolipin Biosynthesis	11	2	36.157	5.8824	0.00015138	0.0083261	0.00043189
Inositol Metabolism	33	4	29.008	5.8824	0.00015265	0.0083261	0.00043189
Urea Cycle	29	7	36.752	5.8824	0.00015767	0.0083563	0.00043189
Lysine Degradation	30	4	45.724	5.8824	0.00015996	0.0083563	0.00043189
Phytanic Acid Peroxisomal Oxidation	26	4	36.416	5.8824	0.0001755	0.0089503	0.00045855
Valine, Leucine and Isoleucine Degradation	60	3	42.771	5.8824	0.00024344	0.012172	0.00061621
Alpha Linolenic Acid and Linoleic Acid Metabolism	19	2	54.801	5.8824	0.00025401	0.012446	0.00062347
Catecholamine Biosynthesis	20	3	43.03	5.8824	0.00026645	0.01279	0.00063479
Beta-Alanine Metabolism	34	3	45.079	5.8824	0.00027803	0.013068	0.00064345
Glutamate Metabolism	49	9	36.957	5.8824	0.00029833	0.013723	0.00067124
Arginine and Proline Metabolism	53	8	37.312	5.8824	0.00033324	0.014996	0.00072572
Pyrimidine Metabolism	59	3	36.121	5.8824	0.00034046	0.014996	0.00072572
Glutathione Metabolism	21	3	33.066	5.8824	0.00040227	0.017298	0.00083549
Tryptophan Metabolism	60	5	37.179	5.8824	0.00042678	0.017925	0.00086424
Phenylalanine and Tyrosine Metabolism	28	5	36.102	5.8824	0.00043839	0.017974	0.00086609
Beta Oxidation of Very Long Chain Fatty Acids	17	1	54.226	5.8824	0.00049248	0.019699	0.00092775
Ammonia Recycling	32	7	36.843	5.8824	0.00049251	0.019699	0.00092775
D-Arginine and D-Ornithine Metabolism	11	1	53.38	5.8824	0.00057386	0.021807	0.0010564
Arachidonic Acid Metabolism	69	2	38.215	5.8824	0.00058997	0.021829	0.0010619
Fatty acid Metabolism	43	2	31.242	5.8824	0.00079287	0.028543	0.0013664
Mitochondrial Beta-Oxidation of Short Chain Saturated Fatty Acids	27	2	31.242	5.8824	0.00079287	0.028543	0.0013664
Methionine Metabolism	43	3	30.949	5.8824	0.0010152	0.034517	0.0017132
Purine Metabolism	74	6	27.723	5.8824	0.0010778	0.035568	0.0017817
Pentose Phosphate Pathway	29	3	34.868	5.8824	0.0012089	0.038684	0.0019584
Alanine Metabolism	17	4	32.396	5.8824	0.0015407	0.047762	0.002447
Cysteine Metabolism	26	3	32.182	5.8824	0.0020925	0.062775	0.003198
Propanoate Metabolism	42	3	32.182	5.8824	0.0020925	0.062775	0.003198
Taurine and Hypotaurine Metabolism	12	1	45.073	5.8824	0.002283	0.063923	0.0034244
Phosphatidylcholine Biosynthesis	14	2	27.669	5.8824	0.0023972	0.064725	0.0034674
Phosphatidylethanolamine Biosynthesis	12	2	27.669	5.8824	0.0023972	0.064725	0.0034674
Lactose Synthesis	20	2	32.91	5.8824	0.0025517	0.064725	0.0036261
Thyroid hormone synthesis	13	1	42.975	5.8824	0.0031413	0.075392	0.004387
Spermidine and Spermine Biosynthesis	18	3	29.454	5.8824	0.004478	0.103	0.0061478
Ketone Body Metabolism	13	1	40.026	5.8824	0.0048365	0.1064	0.0065293
Biotin Metabolism	8	2	29.388	5.8824	0.0083898	0.17619	0.011141
Threonine and 2-Oxobutanoate Degradation	20	1	34.165	5.8824	0.010849	0.21697	0.014173
Steroid Biosynthesis	48	2	25.838	5.8824	0.011332	0.21697	0.014569
Folate Metabolism	29	1	33.555	5.8824	0.011761	0.21697	0.014885
Porphyrin Metabolism	40	1	33.038	5.8824	0.012587	0.21697	0.015686
Phosphatidylinositol Phosphate Metabolism	17	1	32.477	5.8824	0.013545	0.21697	0.016623
Butyrate Metabolism	19	2	24.143	5.8824	0.018615	0.27923	0.022505
Starch and Sucrose Metabolism	31	3	19.535	5.8824	0.01904	0.27923	0.02268
Plasmalogen Synthesis	26	1	28.553	5.8824	0.022345	0.29049	0.026231
Histidine Metabolism	43	2	20.907	5.8824	0.026053	0.31264	0.029856
Phenylacetate Metabolism	9	2	20.049	5.8824	0.02617	0.31264	0.029856
Bile Acid Biosynthesis	65	2	20.649	5.8824	0.028021	0.31264	0.031524
Fructose and Mannose Degradation	32	2	16.775	5.8824	0.052611	0.4735	0.058376
