# Supplementary material for: Proteomic and metabolomic signatures of rectal tumor discriminate patients with different responses to preoperative radiotherapy
Source: Front Oncol. 2024 Feb 12;14:1323961. doi: 10.3389/fonc.2024.1323961 (PMC10896604; doi:10.3389/fonc.2024.1323961)
Supplement: Supplementary file 15 [file Table_5.xlsx]

## Sheet: MetaboAnalyst_result_pathway
Table S5. Results of joint pathway analysis of DAPs and DAMs based on the KEGG database.
KEEG Pathway	Total	Expected	Hits	Raw p	Holm adjust	FDR	Impact
Ribosome	153	16.193	75	1.81e-33	5.98e-31	5.98e-31	0
Spliceosome	135	14.288	69	2.47e-32	8.14e-30	4.08e-30	0
Proteasome	45	4.7625	37	4.57e-29	1.5e-26	5.04e-27	0
RNA transport	168	17.78	61	4.26e-19	1.4e-16	3.52e-17	0.73394
Bacterial invasion of epithelial cells	73	7.7259	32	2.84e-13	9.23e-11	1.34e-11	1.0465
Oxidative phosphorylation	149	15.769	47	2.06e-12	6.68e-10	8.53e-11	0.021739
Phagosome	153	16.193	46	2.3e-11	7.44e-09	8.47e-10	0.17949
Focal adhesion	201	21.273	54	5.39e-11	1.74e-08	1.78e-09	2.0806
Pathogenic Escherichia coli infection	204	21.59	54	9.93e-11	3.19e-08	2.99e-09	0.608
Protein processing in endoplasmic reticulum	172	18.203	48	1.54e-10	4.93e-08	4.25e-09	0.19811
Citrate cycle (TCA cycle)	50	5.2917	23	1.94e-10	6.18e-08	4.59e-09	3.0909
Endocytosis	255	26.988	60	1.49e-09	4.73e-07	3.29e-08	0.17518
Thermogenesis	254	26.882	59	3.44e-09	1.09e-06	7.12e-08	0.33735
Shigellosis	69	7.3025	25	1.35e-08	4.25e-06	2.63e-07	0.45238
Regulation of actin cytoskeleton	218	23.072	51	3.12e-08	9.81e-06	5.74e-07	1.1807
Tight junction	170	17.992	43	3.47e-08	1.09e-05	6.05e-07	0.84444
Valine leucine and isoleucine degradation	90	9.525	28	8.4e-08	2.62e-05	1.39e-06	2.0417
Pyruvate metabolism	70	7.4084	24	8.96e-08	2.79e-05	1.41e-06	2.5283
mRNA surveillance pathway	91	9.6309	28	1.09e-07	3.39e-05	1.64e-06	0.69643
Adherens junction	71	7.5142	24	1.22e-07	3.77e-05	1.75e-06	1.48
Proteoglycans in cancer	211	22.331	48	1.97e-07	6.06e-05	2.71e-06	0.73
Glycolysis or Gluconeogenesis	99	10.478	29	2.13e-07	6.53e-05	2.82e-06	2.9846
Central carbon metabolism in cancer	106	11.218	29	1.04e-06	0.00031675	1.32e-05	0.17699
Aminoacyl-tRNA biosynthesis	118	12.488	31	1.16e-06	0.00035416	1.42e-05	0.52577
Salmonella infection	84	8.89	24	3.8e-06	0.0011565	4.5e-05	0.93878
Yersinia infection	125	13.229	31	4.34e-06	0.0013156	4.96e-05	1.0729
Leukocyte transendothelial migration	116	12.277	29	7.41e-06	0.0022375	8.17e-05	0.91209
Glutathione metabolism	94	9.9484	25	9.78e-06	0.0029452	0.00010448	1.7246
Non-alcoholic fatty liver disease (NAFLD)	151	15.981	34	1.47e-05	0.0044078	0.00015198	0.27143
Alanine aspartate and glutamate metabolism	64	6.7734	19	2.11e-05	0.0063054	0.00021152	2.2787
Epstein-Barr virus infection	204	21.59	41	3.7e-05	0.011035	0.00036049	0.36735
Viral carcinogenesis	201	21.273	39	0.00012587	0.037382	0.0011903	0.0072993
Arrhythmogenic right ventricular cardiomyopathy (ARVC)	79	8.3609	20	0.00015588	0.04614	0.0013945	0.095238
RNA degradation	79	8.3609	20	0.00015588	0.04614	0.0013945	0.048387
Vasopressin-regulated water reabsorption	46	4.8683	14	0.00018906	0.055582	0.0016468	0.14815
Necroptosis	172	18.203	34	0.00023129	0.067769	0.001963	0.38298
Propanoate metabolism	82	8.6784	20	0.00026809	0.078283	0.0022185	1.625
Pentose phosphate pathway	65	6.8792	17	0.00031407	0.091394	0.0025355	2.3492
Protein export	23	2.4342	9	0.00033287	0.096532	0.0026233	0
Systemic lupus erythematosus	136	14.393	28	0.00040273	0.11639	0.0031001	0.15385
Glyoxylate and dicarboxylate metabolism	92	9.7367	21	0.00050156	0.14445	0.0037731	0.76136
Fatty acid degradation	94	9.9484	21	0.00067918	0.19357	0.0047832	2.605
beta-Alanine metabolism	63	6.6675	16	0.00066551	0.19034	0.0047832	1.1481
Apoptosis	140	14.817	28	0.00065607	0.18829	0.0047832	0.45133
Lysosome	127	13.441	26	0.00069841	0.19835	0.0048161	0
ECM-receptor interaction	89	9.4192	20	0.00083461	0.23536	0.0055251	0.97222
Amoebiasis	115	12.171	24	0.00082959	0.23477	0.0055251	0.18333
Ferroptosis	71	7.5142	17	0.00094521	0.2656	0.0061346	0.2973
Antigen processing and presentation	78	8.255	18	0.001076	0.30128	0.0068491	0.57895
Platelet activation	138	14.605	27	0.00115	0.32084	0.0071818	0.52874
Non-homologous end-joining	13	1.3758	6	0.0012346	0.34321	0.0075675	0
Fluid shear stress and atherosclerosis	147	15.558	28	0.0014426	0.3996	0.0086818	0.6
PPAR signaling pathway	81	8.5725	18	0.0017032	0.47008	0.010067	0.67797
Human immunodeficiency virus 1 infection	217	22.966	37	0.002292	0.62801	0.012872	0.53731
Influenza A	173	18.309	31	0.0022943	0.62801	0.012872	0.4386
Proximal tubule bicarbonate reclamation	40	4.2333	11	0.0022764	0.626	0.012872	0.06383
Vibrio cholerae infection	59	6.2442	14	0.0028321	0.77033	0.015624	0.46429
Gap junction	99	10.478	20	0.0032465	0.8798	0.017561	0.61538
DNA replication	36	3.81	10	0.0032894	0.88813	0.017561	0
Arginine and proline metabolism	128	13.547	24	0.0037642	1	0.019777	1
Oxytocin signaling pathway	165	17.463	29	0.0041649	1	0.020888	0.75
Fc gamma R-mediated phagocytosis	101	10.689	20	0.0041269	1	0.020888	0.64286
Thyroid cancer	37	3.9158	10	0.0040883	1	0.020888	0.64
Synthesis and degradation of ketone bodies	16	1.6933	6	0.0043593	1	0.021536	3.4
Retrograde endocannabinoid signaling	167	17.674	29	0.0049667	1	0.024143	0.25
Prion diseases	38	4.0217	10	0.0050328	1	0.024143	0.09375
Peroxisome	83	8.7842	17	0.0055135	1	0.026071	0
Butanoate metabolism	70	7.4084	15	0.0057361	1	0.02637	1.2727
Synaptic vesicle cycle	90	9.525	18	0.0056698	1	0.02637	0.058824
cGMP-PKG signaling pathway	177	18.733	30	0.0061789	1	0.028017	0.41463
Renal cell carcinoma	72	7.62	15	0.0075197	1	0.033635	0.31579
Mismatch repair	23	2.4342	7	0.0078035	1	0.034439	0
Hypertrophic cardiomyopathy (HCM)	93	9.8425	18	0.0080452	1	0.035039	0.15217
Endocrine and other factor-regulated calcium reabsorption	61	6.4559	13	0.01022	1	0.043932	0.16071
HIF-1 signaling pathway	124	13.123	22	0.010395	1	0.044112	0.56098
Human cytomegalovirus infection	231	24.448	36	0.011225	1	0.047032	0.55152
Purine metabolism	225	23.813	35	0.012627	1	0.052243	3.0149
Arginine biosynthesis	44	4.6567	10	0.014755	1	0.060297	1.0857
Human papillomavirus infection	333	35.243	48	0.016122	1	0.065077	0.25
Legionellosis	58	6.1384	12	0.016751	1	0.066803	0.29167
Pertussis	86	9.1017	16	0.017326	1	0.068271	0.44118
Complement and coagulation cascades	80	8.4667	15	0.019456	1	0.075765	0.22388
Viral myocarditis	60	6.35	12	0.021615	1	0.083192	0.27273
Vascular smooth muscle contraction	148	15.663	24	0.022078	1	0.083998	0.64789
Cellular senescence	165	17.463	26	0.024748	1	0.09284	0.40171
Protein digestion and absorption	142	15.028	23	0.024963	1	0.09284	0
Cysteine and methionine metabolism	112	11.853	19	0.025478	1	0.093703	0.8932
Cardiac muscle contraction	90	9.525	16	0.025829	1	0.09395	0.11628
Rap1 signaling pathway	215	22.754	32	0.029346	1	0.10558	1.0319
Dilated cardiomyopathy (DCM)	99	10.478	17	0.03	1	0.10564	0.2766
Epithelial cell signaling in Helicobacter pylori infection	77	8.1492	14	0.029928	1	0.10564	0.2619
Toxoplasmosis	115	12.171	19	0.032583	1	0.11353	0.37705
Sulfur metabolism	43	4.5508	9	0.033384	1	0.11511	0.54386
D-Glutamine and D-glutamate metabolism	18	1.905	5	0.034906	1	0.11911	1.0625
VEGF signaling pathway	65	6.8792	12	0.038234	1	0.12907	0.54545
Colorectal cancer	87	9.2075	15	0.038603	1	0.12907	0.35135
Sphingolipid signaling pathway	134	14.182	21	0.042631	1	0.14111	0.5
Aldosterone-regulated sodium reabsorption	45	4.7625	9	0.043411	1	0.14227	0.14286
Long-term potentiation	74	7.8317	13	0.045454	1	0.1475	1
Pathways in cancer	562	59.478	72	0.048156	1	0.15327	0.36728
Cholesterol metabolism	60	6.35	11	0.048086	1	0.15327	0.1
Ribosome biogenesis in eukaryotes	105	11.113	17	0.049071	1	0.15469	0.05
