# Supplementary material for: Proteomic and metabolomic signatures of rectal tumor discriminate patients with different responses to preoperative radiotherapy
Source: Front Oncol. 2024 Feb 12;14:1323961. doi: 10.3389/fonc.2024.1323961 (PMC10896604; doi:10.3389/fonc.2024.1323961)
Supplement: Supplementary file 16 [file Table_6.xlsx]

## Sheet: correlation coefficient
Table S6. Results of the Pearson’s correlation analysis performed for DAPs and DAPs as well as clinical data of rectal cancer patients.
	Citric acid	Oleic acid	Pelargonic acid	O95425	P46821	Hexose	P07951	P09493	P08648	Q05682	Q9HBL0	P16070	P12814	Q8WX93	P10643	P17661	Q93052	P51884	Phosphoenolpyruvic	Cis-gondoic acid	Alpha-aminoadipic	P50479	Asparagine	Cytosin	Q14112	Ribitol	Glycerol	Galactose	P23219	Q13885	Alpha-Ketoglutaric	Q969E4	Lysine	Malic acid	Q9ULC3	Q16363	Q6PCB0	Aspartic acid	Squalene	Uridine	Lactobionic acid	Cadaverine	N-Acetyl-aspartic	Glycerol-3-phospha	Linoleic acid	P78559	1-Monopalmitin	Glyceric acid	Phosphoethanolamin
Citric acid	1	0.90244	0.90474	0.9049	0	0	0.89562	0.88843	0.87122	0.88587	0.87783	0.86843	0.81864	0.85465	0.87418	0.85649	0.80133	0.81583	0.90028	0.8086	0.8492	0	0.83797	0.91543	0.8776	0.84154	0	0	0	0.89457	0	0.87003	0	0.87769	0	0	0	0.82267	0	0.87311	0	0.86598	0.81569	0	0	0	0	0	0
Oleic acid	0.90244	1	0.93348	0.94513	0.87057	0.81199	0.854	0.82449	0.85781	0.84505	0.88996	0.86501	0.88153	0.84519	0	0	0	0	0	0.81554	0	0	0	0.90567	0.88738	0.8949	0	0	0.83636	0.85479	0.85028	0	0	0.8851	0	0.83037	0.86159	0	0	0.86148	0	0.91093	0.89298	0	0.83689	0.86016	0.80539	0	0
Pelargonic acid	0.90474	0.93348	1	0.90031	0.80149	0.83201	0.85905	0.83383	0.85019	0.86277	0.88457	0.83218	0.8229	0.82272	0.83859	0	0	0	0	0	0	0	0	0.9235	0	0.80336	0	0	0.81558	0.89095	0	0	0	0.92584	0	0	0	0	0	0	0	0.88486	0.9006	0.84088	0.8269	0.92896	0	0	0
O95425	0.9049	0.94513	0.90031	1	0.88788	0.87091	0.90047	0.88339	0.9112	0.8912	0.92223	0.92245	0.86942	0.87123	0.80752	0.80968	0	0	0.84437	0.87473	0.84622	0	0.80274	0.94227	0.90905	0.95249	0.83498	0	0.91551	0.87431	0.83521	0.81634	0	0.83749	0	0.80221	0.85935	0	0	0	0	0.85588	0.8563	0	0	0	0	0	0
P46821	0	0.87057	0.80149	0.88788	1	0.80669	0.89007	0.87712	0.93729	0.8926	0.92919	0.91947	0.87876	0.87761	0.80203	0	0	0	0	0.88312	0.87439	0.86676	0.82873	0.89653	0.88807	0.8273	0	0	0	0	0.83238	0	0	0	0.81745	0.80846	0.84653	0	0	0	0	0	0	0	0	0	0	0	0
Hexose	0	0.81199	0.83201	0.87091	0.80669	1	0.86931	0.85223	0.861	0.85036	0.85197	0.80482	0.81914	0.80491	0	0	0	0	0	0	0	0	0	0	0	0	0	0	0	0	0	0	0	0	0	0	0	0	0	0	0	0	0	0	0	0	0	0	0
P07951	0.89562	0.854	0.85905	0.90047	0.89007	0.86931	1	0.99467	0.97696	0.9808	0.96369	0.94435	0.91237	0.93838	0.90111	0.97042	0.94983	0.82783	0.82595	0.82102	0.88406	0.81594	0.83911	0.91388	0.84086	0.80607	0	0	0.81872	0.82226	0	0	0	0.83071	0	0	0	0	0	0	0	0	0	0	0	0	0	0	0
P09493	0.88843	0.82449	0.83383	0.88339	0.87712	0.85223	0.99467	1	0.96685	0.9845	0.95906	0.94229	0.90293	0.94399	0.92547	0.97306	0.96033	0.82934	0.82406	0.8308	0.89052	0.84787	0.84572	0.89915	0.82526	0	0	0	0.81205	0.80927	0	0	0	0.81923	0	0	0	0	0	0	0	0	0	0	0	0	0	0	0
P08648	0.87122	0.85781	0.85019	0.9112	0.93729	0.861	0.97696	0.96685	1	0.96565	0.97779	0.9433	0.8952	0.92638	0.85896	0.92703	0.91919	0.82327	0.81081	0.84915	0.89746	0.82789	0.82801	0.92612	0.85315	0.81444	0	0	0.82735	0.81699	0.8365	0	0	0.81582	0.80057	0	0	0	0	0	0	0	0	0	0	0	0	0	0
Q05682	0.88587	0.84505	0.86277	0.8912	0.8926	0.85036	0.9808	0.9845	0.96565	1	0.98021	0.94881	0.93811	0.9796	0.91282	0.94879	0.93998	0	0.80291	0.85057	0.93087	0.86801	0.89445	0.91792	0.83024	0.80858	0	0	0.8534	0.82182	0	0	0	0.86981	0.8243	0.82258	0	0	0.81268	0	0	0	0	0	0	0	0	0	0
Q9HBL0	0.87783	0.88996	0.88457	0.92223	0.92919	0.85197	0.96369	0.95906	0.97779	0.98021	1	0.95593	0.94567	0.96691	0.88295	0.91754	0.91473	0	0	0.87227	0.91328	0.85792	0.86877	0.93916	0.85415	0.82759	0.81315	0	0.88828	0.86057	0.84937	0	0	0.87307	0.87777	0.84262	0.8582	0	0	0	0	0	0	0	0	0	0	0	0
P16070	0.86843	0.86501	0.83218	0.92245	0.91947	0.80482	0.94435	0.94229	0.9433	0.94881	0.95593	1	0.93143	0.94284	0.84547	0.87768	0.87193	0	0.81593	0.89097	0.90216	0.85435	0.86371	0.94954	0.89937	0.86308	0	0	0.90532	0.85963	0	0.87058	0.82212	0.81962	0.86119	0.84422	0.86353	0	0	0	0	0	0	0	0	0	0	0	0
P12814	0.81864	0.88153	0.8229	0.86942	0.87876	0.81914	0.91237	0.90293	0.8952	0.93811	0.94567	0.93143	1	0.97214	0.8042	0.85679	0.86157	0	0	0.83177	0.86442	0.80258	0.86855	0.8638	0.82969	0.82458	0	0	0.87451	0.80686	0	0	0	0.83384	0.83944	0.90299	0.86252	0	0	0	0	0	0	0	0	0	0	0	0
Q8WX93	0.85465	0.84519	0.82272	0.87123	0.87761	0.80491	0.93838	0.94399	0.92638	0.9796	0.96691	0.94284	0.97214	1	0.86889	0.90113	0.90568	0	0	0.87508	0.93343	0.87167	0.91564	0.88347	0.82423	0.82198	0	0	0.87658	0.80854	0.80922	0	0	0.85291	0.87026	0.89787	0.83207	0.83117	0.82555	0	0	0	0	0	0	0	0	0	0
P10643	0.87418	0	0.83859	0.80752	0.80203	0	0.90111	0.92547	0.85896	0.91282	0.88295	0.84547	0.8042	0.86889	1	0.88192	0.85581	0	0	0	0.82456	0.88643	0.81159	0.83472	0	0	0	0	0	0	0	0	0	0.83442	0	0	0	0	0	0.80106	0.80494	0	0	0	0	0	0	0	0
P17661	0.85649	0	0	0.80968	0	0	0.97042	0.97306	0.92703	0.94879	0.91754	0.87768	0.85679	0.90113	0.88192	1	0.98006	0.81086	0	0	0.83462	0	0	0.83895	0	0	0	0	0	0.80062	0	0	0	0	0	0	0	0	0	0	0	0	0	0	0	0	0	0	0
Q93052	0.80133	0	0	0	0	0	0.94983	0.96033	0.91919	0.93998	0.91473	0.87193	0.86157	0.90568	0.85581	0.98006	1	0.82766	0	0	0.8207	0	0	0.80758	0	0	0	0	0	0	0	0	0	0	0	0	0	0	0	0	0	0	0	0	0	0	0	0	0
P51884	0.81583	0	0	0	0	0	0.82783	0.82934	0.82327	0	0	0	0	0	0	0.81086	0.82766	1	0.89289	0	0	0	0	0	0.81298	0	0	0	0	0	0	0.84243	0	0	0	0	0	0	0.80299	0	0	0	0	0	0	0	0	0	0
Phosphoenolpyruvic	0.90028	0	0	0.84437	0	0	0.82595	0.82406	0.81081	0.80291	0	0.81593	0	0	0	0	0	0.89289	1	0.82639	0.82667	0	0.81924	0	0.87901	0.85642	0	0	0	0	0	0.86567	0.86234	0	0	0	0	0.81497	0.82808	0	0	0	0	0	0	0	0	0	0
Cis-gondoic acid	0.8086	0.81554	0	0.87473	0.88312	0	0.82102	0.8308	0.84915	0.85057	0.87227	0.89097	0.83177	0.87508	0	0	0	0	0.82639	1	0.92231	0.89293	0.88746	0.85602	0.92106	0.88615	0	0.80642	0.82566	0	0.84468	0.83524	0.95752	0	0.90555	0.89831	0.89211	0.88976	0.81569	0	0	0	0	0	0	0	0	0	0
Alpha-aminoadipic	0.8492	0	0	0.84622	0.87439	0	0.88406	0.89052	0.89746	0.93087	0.91328	0.90216	0.86442	0.93343	0.82456	0.83462	0.8207	0	0.82667	0.92231	1	0.88379	0.97638	0.89034	0.86453	0.84691	0	0	0.80253	0	0.81513	0.80174	0.87531	0.83503	0.86111	0.84864	0	0.90441	0.86041	0	0	0	0	0	0	0	0	0	0
P50479	0	0	0	0	0.86676	0	0.81594	0.84787	0.82789	0.86801	0.85792	0.85435	0.80258	0.87167	0.88643	0	0	0	0	0.89293	0.88379	1	0.86213	0.81463	0.81804	0	0	0	0	0	0	0	0.89101	0.80201	0.86711	0.86972	0.81	0.84498	0.90901	0.81035	0	0	0	0	0	0	0	0	0
Asparagine	0.83797	0	0	0.80274	0.82873	0	0.83911	0.84572	0.82801	0.89445	0.86877	0.86371	0.86855	0.91564	0.81159	0	0	0	0.81924	0.88746	0.97638	0.86213	1	0.84847	0.84617	0.82661	0	0	0	0	0	0	0.85123	0.83672	0.83523	0.88182	0	0.92947	0.88341	0	0	0	0	0	0	0	0	0	0
Cytosin	0.91543	0.90567	0.9235	0.94227	0.89653	0	0.91388	0.89915	0.92612	0.91792	0.93916	0.94954	0.8638	0.88347	0.83472	0.83895	0.80758	0	0	0.85602	0.89034	0.81463	0.84847	1	0.92043	0.86844	0	0	0.88547	0.8908	0	0.84568	0	0.91571	0.82914	0	0.84638	0.80507	0	0.82072	0	0.84234	0.8265	0	0	0	0	0	0
Q14112	0.8776	0.88738	0	0.90905	0.88807	0	0.84086	0.82526	0.85315	0.83024	0.85415	0.89937	0.82969	0.82423	0	0	0	0.81298	0.87901	0.92106	0.86453	0.81804	0.84617	0.92043	1	0.90392	0	0	0	0	0	0.89145	0.8955	0.8325	0.80722	0.83941	0.89023	0.87773	0.8294	0.84422	0	0.80544	0	0	0	0	0	0	0
Ribitol	0.84154	0.8949	0.80336	0.95249	0.8273	0	0.80607	0	0.81444	0.80858	0.82759	0.86308	0.82458	0.82198	0	0	0	0	0.85642	0.88615	0.84691	0	0.82661	0.86844	0.90392	1	0	0	0.87669	0.80123	0.82606	0.81633	0.81209	0	0	0.80622	0.81468	0.80154	0	0	0	0	0.81804	0	0	0	0	0	0
Glycerol	0	0	0	0.83498	0	0	0	0	0	0	0.81315	0	0	0	0	0	0	0	0	0	0	0	0	0	0	0	1	0	0.81785	0	0.80815	0	0	0	0	0	0	0	0	0	0	0	0	0	0	0	0	0	0
Galactose	0	0	0	0	0	0	0	0	0	0	0	0	0	0	0	0	0	0	0	0.80642	0	0	0	0	0	0	0	1	0	0	0	0	0.80489	0	0	0	0	0	0	0	0	0	0	0	0	0	0	0	0
P23219	0	0.83636	0.81558	0.91551	0	0	0.81872	0.81205	0.82735	0.8534	0.88828	0.90532	0.87451	0.87658	0	0	0	0	0	0.82566	0.80253	0	0	0.88547	0	0.87669	0.81785	0	1	0.84253	0	0	0	0	0.8525	0.81984	0.85863	0	0	0	0	0	0	0	0	0	0	0	0
Q13885	0.89457	0.85479	0.89095	0.87431	0	0	0.82226	0.80927	0.81699	0.82182	0.86057	0.85963	0.80686	0.80854	0	0.80062	0	0	0	0	0	0	0	0.8908	0	0.80123	0	0	0.84253	1	0	0.8421	0	0	0	0	0	0	0	0	0	0.8023	0.83553	0	0	0.83623	0	0	0
Alpha-Ketoglutaric	0	0.85028	0	0.83521	0.83238	0	0	0	0.8365	0	0.84937	0	0	0.80922	0	0	0	0	0	0.84468	0.81513	0	0	0	0	0.82606	0.80815	0	0	0	1	0	0	0	0	0	0	0	0	0	0	0	0	0	0	0	0	0	0
Q969E4	0.87003	0	0	0.81634	0	0	0	0	0	0	0	0.87058	0	0	0	0	0	0.84243	0.86567	0.83524	0.80174	0	0	0.84568	0.89145	0.81633	0	0	0	0.8421	0	1	0.84854	0	0	0	0	0.80028	0	0	0	0	0	0	0	0	0	0	0
Lysine	0	0	0	0	0	0	0	0	0	0	0	0.82212	0	0	0	0	0	0	0.86234	0.95752	0.87531	0.89101	0.85123	0	0.8955	0.81209	0	0.80489	0	0	0	0.84854	1	0	0.82305	0.84771	0.81242	0.88433	0.86722	0	0	0	0	0	0	0	0	0	0
Malic acid	0.87769	0.8851	0.92584	0.83749	0	0	0.83071	0.81923	0.81582	0.86981	0.87307	0.81962	0.83384	0.85291	0.83442	0	0	0	0	0	0.83503	0.80201	0.83672	0.91571	0.8325	0	0	0	0	0	0	0	0	1	0	0.81646	0	0.82525	0	0.86714	0	0	0	0	0	0.81967	0	0	0
Q9ULC3	0	0	0	0	0.81745	0	0	0	0.80057	0.8243	0.87777	0.86119	0.83944	0.87026	0	0	0	0	0	0.90555	0.86111	0.86711	0.83523	0.82914	0.80722	0	0	0	0.8525	0	0	0	0.82305	0	1	0.91242	0.93444	0.85601	0	0	0	0	0	0	0	0	0	0	0
Q16363	0	0.83037	0	0.80221	0.80846	0	0	0	0	0.82258	0.84262	0.84422	0.90299	0.89787	0	0	0	0	0	0.89831	0.84864	0.86972	0.88182	0	0.83941	0.80622	0	0	0.81984	0	0	0	0.84771	0.81646	0.91242	1	0.92672	0.90995	0.82417	0	0.81775	0	0	0	0	0	0	0	0
Q6PCB0	0	0.86159	0	0.85935	0.84653	0	0	0	0	0	0.8582	0.86353	0.86252	0.83207	0	0	0	0	0	0.89211	0	0.81	0	0.84638	0.89023	0.81468	0	0	0.85863	0	0	0	0.81242	0	0.93444	0.92672	1	0.845	0	0	0	0	0	0	0	0	0	0	0
Aspartic acid	0.82267	0	0	0	0	0	0	0	0	0	0	0	0	0.83117	0	0	0	0	0.81497	0.88976	0.90441	0.84498	0.92947	0.80507	0.87773	0.80154	0	0	0	0	0	0.80028	0.88433	0.82525	0.85601	0.90995	0.845	1	0.89082	0.8088	0	0	0	0	0	0	0	0	0
Squalene	0	0	0	0	0	0	0	0	0	0.81268	0	0	0	0.82555	0	0	0	0.80299	0.82808	0.81569	0.86041	0.90901	0.88341	0	0.8294	0	0	0	0	0	0	0	0.86722	0	0	0.82417	0	0.89082	1	0.82234	0	0	0	0	0	0	0	0	0
Uridine	0.87311	0.86148	0	0	0	0	0	0	0	0	0	0	0	0	0.80106	0	0	0	0	0	0	0.81035	0	0.82072	0.84422	0	0	0	0	0	0	0	0	0.86714	0	0	0	0.8088	0.82234	1	0.82354	0.82006	0	0	0	0	0	0	0
Lactobionic acid	0	0	0	0	0	0	0	0	0	0	0	0	0	0	0.80494	0	0	0	0	0	0	0	0	0	0	0	0	0	0	0	0	0	0	0	0	0.81775	0	0	0	0.82354	1	0	0	0	0	0	0	0	0
Cadaverine	0.86598	0.91093	0.88486	0.85588	0	0	0	0	0	0	0	0	0	0	0	0	0	0	0	0	0	0	0	0.84234	0.80544	0	0	0	0	0.8023	0	0	0	0	0	0	0	0	0	0.82006	0	1	0.93643	0.86318	0.89737	0.8891	0.88272	0	0
N-Acetyl-aspartic	0.81569	0.89298	0.9006	0.8563	0	0	0	0	0	0	0	0	0	0	0	0	0	0	0	0	0	0	0	0.8265	0	0.81804	0	0	0	0.83553	0	0	0	0	0	0	0	0	0	0	0	0.93643	1	0.89079	0.91478	0.87774	0.82986	0	0
Glycerol-3-phospha	0	0	0.84088	0	0	0	0	0	0	0	0	0	0	0	0	0	0	0	0	0	0	0	0	0	0	0	0	0	0	0	0	0	0	0	0	0	0	0	0	0	0	0.86318	0.89079	1	0.96388	0.85518	0.90162	0	0.88001
Linoleic acid	0	0.83689	0.8269	0	0	0	0	0	0	0	0	0	0	0	0	0	0	0	0	0	0	0	0	0	0	0	0	0	0	0	0	0	0	0	0	0	0	0	0	0	0	0.89737	0.91478	0.96388	1	0.85804	0.9484	0	0.86323
P78559	0	0.86016	0.92896	0	0	0	0	0	0	0	0	0	0	0	0	0	0	0	0	0	0	0	0	0	0	0	0	0	0	0.83623	0	0	0	0.81967	0	0	0	0	0	0	0	0.8891	0.87774	0.85518	0.85804	1	0.8669	0	0
1-Monopalmitin	0	0.80539	0	0	0	0	0	0	0	0	0	0	0	0	0	0	0	0	0	0	0	0	0	0	0	0	0	0	0	0	0	0	0	0	0	0	0	0	0	0	0	0.88272	0.82986	0.90162	0.9484	0.8669	1	0.80437	0.83971
Glyceric acid	0	0	0	0	0	0	0	0	0	0	0	0	0	0	0	0	0	0	0	0	0	0	0	0	0	0	0	0	0	0	0	0	0	0	0	0	0	0	0	0	0	0	0	0	0	0	0.80437	1	0
Phosphoethanolamin	0	0	0	0	0	0	0	0	0	0	0	0	0	0	0	0	0	0	0	0	0	0	0	0	0	0	0	0	0	0	0	0	0	0	0	0	0	0	0	0	0	0	0	0.88001	0.86323	0	0.83971	0	1
Arachidonic acid	0	0	0	0	0	0	0	0	0	0	0	0	0	0	0	0	0	0	0	0	0	0	0	0	0	0	0	0	0	0	0	0	0	0	0	0	0	0	0	0	0	0	0	0.83872	0.84443	0	0	0.84396	0.89906
Propylene glycol	0	0	0	0	0	0	0	0	0	0	0	0	0	0	0	0	0	0	0	0	0	0	0	0	0	0	0	0	0	0	0	0	0	0	0	0	0	0	0	0	0	0.80145	0	0.83195	0.82541	0.91026	0.84995	0.82399	0.88545
P07585	0.80224	0	0	0	0	0	0.80465	0	0.82309	0	0	0	0	0	0	0	0	0.95517	0.88522	0	0	0	0	0	0.8397	0	0	0	0	0	0	0	0	0	0	0	0	0	0.83794	0	0	0	0	0	0	0	0	0	0
P19823	0	0	0	0	0	0	0	0	0	0	0	0	0	0	0	0	0	0	0	0	0	0	0	0	0	0	0	0	0	0	0	0	0	0	0	0	0	0	0	0	0	0	0	0	0	0	0	0	0
Panose	0	0	0	0	0	0	0	0	0	0	0.83273	0	0	0	0	0.84482	0.80654	0	0	0	0	0	0	0	0	0	0.81662	0	0.81651	0.85974	0.81845	0	0	0	0	0	0	0	0	0	0	0	0	0	0	0	0	0	0
Maltose	0	0	0	0.80286	0	0	0	0	0	0	0	0	0	0	0	0	0	0	0	0.87127	0	0	0	0	0	0	0	0	0	0	0.84162	0	0	0	0	0	0	0	0	0	0.80935	0	0	0	0	0	0	0	0
P39059	0	0	0	0	0	0	0	0	0	0	0	0	0	0	0	0	0	0	0	0	0	0	0	0	0.83405	0	0	0	0	0	0	0	0.825	0	0	0	0	0	0	0	0	0	0	0	0	0	0	0	0
Hypotaurine	0	0	0	0	0	0	0	0	0	0	0	0	0	0	0	0	0	0	0	0.84386	0	0	0	0	0.80232	0	0	0.92405	0	0	0	0	0.87194	0	0	0	0	0	0	0	0	0	0	0	0	0	0	0	0
Hydrocinnamic acid	0	0	0	0.80138	0.82153	0	0	0	0	0	0	0	0	0	0	0	0	0	0	0.91873	0	0.80484	0	0.80163	0.90187	0.82845	0	0.81633	0	0	0	0	0.9084	0	0	0	0	0	0	0	0	0	0	0	0	0	0	0	0
Galacturonic acid	0	0	0	0	0	0	0	0	0	0	0	0	0	0	0	0	0	0	0	0.85977	0	0	0	0	0	0	0	0.88601	0	0	0	0	0.90117	0	0	0	0	0	0	0	0	0	0	0	0	0	0	0	0
Tryptophan	0	0	0	0	0	0	0	0	0	0	0	0	0	0	0	0	0	0	0	0	0	0	0	0	0	0	0	0	0	0	0	0	0.80917	0	0	0	0	0	0	0	0	0	0	0	0	0	0	0	0
Phenylalanine	0	0	0	0	0	0	0	0	0	0	0	0	0	0	0	0	0	0	0.80757	0.814	0	0	0	0	0.81329	0	0	0	0	0	0	0	0.88069	0	0	0	0	0.85396	0	0	0	0	0	0	0	0	0	0	0
5	6-Dihydrouracil	0	0	0	0	0	0	0	0	0	0	0	0	0	0	0	0	0	0	0	0	0	0	0	0	0	0	0	0	0	0	0	0	0	0	0	0	0	0	0	0	0	0	0	0	0	0	0	0
Q9H6Z4	0	0	0	0	0	0	0	0	0	-0.80957	0	0	-0.85318	-0.84103	0	0	0	0	0	0	0	0	0	0	0	0	0	0	0	0	0	0	0	0	0	-0.80802	0	0	0	0	0	0	0	0	0	0	0	0	0
P55039	0	0	0	0	0	-0.8476	0	0	0	0	0	0	0	0	0	0	0	0	0	0	0	0	0	0	0	0	0	0	0	0	0	0	0	0	0	0	0	0	0	0	0	0	0	0	0	0	0	0	0
Carinitine	0	0	0	0	0	0	0	0	0	0	0	0	0	0	0	0	0	0	0	0	0	0	0	0	0	0	0	0	0	0	0	0	0	0	0	0	0	0	0	0	0	0	0	0	0	0	0	0	0
Q96ST3	0	0	0	0	0	0	0	0	0	0	0	0	0	0	-0.80237	0	0	0	0	0	0	0	0	0	0	0	0	0	0	0	0	0	0	0	0	0	0	0	0	0	-0.80333	0	0	0	0	0	0	0	0
Urea	0	0	0	0	0	0	0	0	0	0	0	0	0	0	0	0	0	0	0	0.80902	0	0	0	0	0	0	0	0.8287	0	0	0	0	0	0	0	0	0	0	0	0	0	0	0	0	0	0	0	0	0
N-Acetyl glucosami	0	0	0	0	0	0	0	0	0	0	0	0.81346	0	0	0	0	0	0	0	0.84275	0	0.83746	0	0	0	0	0	0.80267	0	0	0	0.80174	0.83919	0	0	0	0	0	0	0	0	0	0	0	0	0	0	0	0
Inositol-4-monopho	0	0	0	0	0	0	0	0	0	0	0	0	0	0	0	0	0	0	0	0	0	0	0	0	0	0	0	0	0	0	0	0	0	0	0	0	0	0	0	0	0	0	0	0	0	0	0	0	0
Beta-Ketoadipic ac	0	0	0	0	0	0	0	0	0	0	0	0	0	0	0	0	0	0	0	0.82938	0	0	0	0	0	0.80439	0	0	0	0	0	0	0.80596	0	0	0	0	0	0	0	0	0	0	0	0	0	0	0	0
Threonine	0	0	0	0	0	0	0	0	0	0	0	0	0	0	0	0	0	0	0	0	0	0	0	0	0	0	0	0	0	0	0	0	0	0	0	0	0	0	0	0	0	0	0	0	0	0	0	0	0
Isohexonic acid	0	0	0	0	0	0	0	0	0	0	0	0	0	0	0	0	0	0	0	0	0	0	0	0	0	0	0	0	0	0	0	0	0	0	0	0	0	0	0	0	0	0	0	0	0	0	0	0	0
Glucose	0.82118	0.83855	0	0.90521	0.88054	0	0.86841	0.87013	0.88368	0.86117	0.8696	0.86845	0.82901	0.86332	0	0	0	0.81928	0.87746	0.94524	0.86145	0.82356	0.80552	0.81606	0.88634	0.89894	0	0.81938	0	0	0.86272	0	0.89896	0	0	0.81445	0.81818	0	0	0	0	0	0	0	0	0	0	0	0
Hexitol	0	0	0	0	0	0	0	0.80041	0	0.8137	0.80938	0	0.82083	0.85017	0	0	0	0	0.80015	0.88099	0.81454	0	0	0	0	0.81346	0	0	0	0	0.84987	0	0.8286	0	0	0.82993	0	0	0	0	0	0	0	0	0	0	0	0	0
Q9Y6B6	0.82926	0.84874	0	0.89136	0.84303	0	0.89799	0.9021	0.87431	0.88721	0.90904	0.95191	0.90604	0.89733	0.82602	0.85973	0.8631	0	0	0.88452	0.81148	0.80971	0	0.87661	0.86475	0.8254	0	0	0.89401	0.83894	0	0.85841	0.80683	0	0.86005	0.85192	0.88534	0	0	0	0	0	0	0	0	0	0	0	0
Q9Y6F6	0	0	0	0.8343	0	0	0.83946	0.85046	0.80548	0.82957	0.84339	0.82076	0	0.82164	0	0.85331	0.84548	0	0	0.85299	0	0	0	0	0	0	0.83346	0	0.82272	0	0	0	0	0	0.80828	0	0	0	0	0	0	0	0	0	0	0	0	0	0
Q9H773	0	0	0	0	0	0	0	0	0	0	0	0	0	0	0	0	0	0	0	0	0	0	0	0	0	0	0	0	0	0	0	0	0	0	0	0	0	0	0	0	0	0	0	0	0	0	0	0	0
Q09161	-0.82097	0	0	0	0	0	0	0	0	0	0	0	0	0	0	-0.80223	0	0	0	0	0	0	0	0	0	0	0	0	0	0	0	0	0	0	0	0	0	0	0	0	0	0	0	0	0	0	0	0	0
Q12874	0	0	0	0	0	0	0	0	0	0	0	0	0	0	0	-0.82179	0	0	0	0	0	0	0	0	0	0	0	0	0	0	0	0	0	0	0	0	0	0	0	0	0	0	0	0	0	0	0	0	0
Q9UMS4	0	0	0	0	0	0	0	0	0	0	0	0	0	0	0	-0.80551	0	0	0	0	0	0	0	0	0	0	0	0	0	0	0	0	0	0	0	0	0	0	0	0	0	0	0	0	0	0	0	0	0
Q9Y6H1	0	0	0	0	0	0	-0.81015	-0.82287	0	0	0	0	0	0	0	-0.83239	-0.82893	-0.80956	0	0	0	0	0	0	0	0	0	0	0	0	0	0	0	0	0	0	0	0	0	0	0	0	0	0	0	0	0	0	0
P55060	0	0	0	0	0	0	0	0	0	0	0	0	0	0	0	0	0	-0.84741	0	0	0	0	0	0	0	0	0	-0.8134	0	0	0	0	0	0	0	0	0	0	0	0	0	0	0	0	0	0	0	0	0
O43290	0	0	0	0	0	0	0	0	0	0	0	0	0	0	0	0	0	0	0	0	0	0	0	0	0	0	0	0	0	0	0	0	0	0	0	0	0	0	0	0	0	0	0	0	0	0	0	0	0
Q96A49	-0.80065	0	0	0	0	0	0	-0.80381	0	0	0	0	0	0	0	-0.83122	0	0	0	0	0	0	0	0	0	0	0	0	0	0	0	0	0	0	0	0	0	0	0	0	0	0	0	0	0	0	0	0	0
P04350	0	0	0	0	0	0	0	0	0	0	0	0	0	0	0	0	0	0	0	0	0	0	0	0	0	0	0	0	0	0	0	0	0	0	0	0	0	0	0	0	0	0	0	0	0	0	0	0	0
Q92688	0	0	0	0	0	0	0	0	0	0	0	0	0	0	0	0	0	0	0	0	0	0	0	0	0	0	0	0	0	0	0	0	0	0	0	0	0	0	0	0	0	0	0	0	0	0	0	0	0
O15551	0	0	0	0	0	0	0	0	0	0	0	0	0	0	0	0	0	0	0	0	0	0	0	0	0	0	0	0	0	0	0	0	0	0	0	0	0	0	0	0	0	0	0	0	0	0	0	0	0
P55196	0	0	0	0	0	0	0	0	0	0	0	0	0	0	0	0	0	0	0	0	0	0	0	0	0	0	0	0	0	0	0	0	0	0	0	0	0	0	0	0	0	0	0	0	0	0	0	0	0
Q8IX12	0	0	0	0	0	0	0	0	0	0	0	0	0	0	0	0	0	0	0	0	0	0	0	0	0	0	0	0	0	0	0	0	0	0	0	0	0	0	0	0	0	0	0	0	0	0	0	0	0
Q9UK45	0	0	0	0	0	0	0	0	0	0	0	0	0	0	0	0	0	0	0	0	0	0	0	0	0	0	0	0	0	0	0	0	0	0	0	0	0	0	0	0	0	0	0	0	0	0	0	0	0
Q96AB3	0	0	0	0	0	0	0	0	0	0	0	0	0	0	0	0	0	0	0	0	0	0	0	0	0	0	0	0	0	0	0	0	0	0	0	0	0	0	0	0	0	0	0	0	0	0	0	0	0
O75955	0	0	0	0	0	0	0	0	0	0	0	0	0	0	0	0	0	0	0	0	0	0	0	0	0	0	0	0	0	0	0	0	0	0	0	0	0	0	0	0	0	0	0	0	0	0	0	0	0
Q99598	0	0	0	0	0	0	0	0	0	0	0	0	0	0	0	0	0	0	0	0	0	0	0	0	0	0	0	0	0	0	0	0	0	0	0	0	0	0	0	0	0	0	0	0	0	0	0	0	0
Q8TBC4	0	0	0	0	0	0	0	0	0	0	0	0	0	0	0	0	0	0	0	0	0	0	0	0	0	0	0	0	0	0	0	0	0	0	0	0	0	0	0	0	0	0	0	0	0	0	0	0	0
Q9UNZ2	0	0	0	0	0	0	0	0	0	0	0	0	0	0	0	0	0	0	0	0	0	0	0	0	0	0	0	0	0	0	0	0	0	0	0	0	0	0	0	0	0	0	0	0	0	0	0	0	0
P42229	0	0	0	0	0	0	0	0	0	0	0	0	0	0	0	0	0	0	0	0	0	0	0	0	0	0	0	-0.81858	0	0	0	0	0	0	0	0	0	0	0	0	0	0	0	0	0	0	0	0	0
Q13131	0	0	0	0	0	0	0	0	0	0	0	0	0	0	0	0	0	0	0	0	0	0	0	0	0	0	0	0	0	0	0	0	0	0	0	0	0	0	0	0	0	0	0	0	0	0	0	0	0
Q13405	0	0	0	0	0	0	0	0	0	0	0	0	0	0	0	0	0	0	0	0	0	0	0	0	0	0	0	0	0	0	0	0	0	0	0	0	0	0	0	0	0	0	0	0	0	0	0	0	0
Q9HB71	0	0	0	0	0	0	0	0	0	0	0	0	0	0	0	0	0	0	0	0	0	0	0	0	0	0	0	0	0	0	0	0	0	0	0	0	0	0	0	0	0	0	0	0	0	0	0	0	0
Q9Y2R0	0	0	0	0	0	0	0	0	0	0	0	0	0	0	0	0	0	0	0	0	0	0	0	0	0	0	0	0	0	0	0	0	0	0	0	0	0	0	0	0	0	0	0	0	0	0	0	0	0
Q7L0Y3	-0.81005	0	0	0	0	0	0	0	0	0	0	0	0	0	0	0	0	-0.81028	0	0	0	0	0	0	-0.80285	0	0	0	0	0	0	-0.83819	0	0	0	0	0	0	0	0	0	0	0	0	0	0	0	0	0
O43447	0	0	0	0	0	0	0	0	0	0	0	0	0	0	0	0	0	0	0	0	0	0	0	0	0	0	0	0	0	0	0	0	0	0	0	0	0	0	0	0	0	0	0	0	0	0	0	0	0
P51553	0	0	0	0	0	0	0	0	0	0	0	0	0	0	0	0	0	0	0	0	0	0	0	0	0	0	0	0	0	0	0	0	0	0	0	0	0	0	0	0	0	0	0	0	0	0	0	0	0
P33316	0	0	0	0	0	0	0	0	0	0	0	0	0	0	0	0	0	0	0	0	0	0	0	0	0	0	0	0	0	0	0	0	0	0	0	0	0	0	0	0	0	0	0	0	0	0	0	0	0
Q9BRX8	0	0	0	0	0	0	0	0	0	0	0	0	0	0	0	0	0	0	0	0	0	0	0	0	0	0	0	-0.80246	0	0	0	0	0	0	0	0	0	0	0	0	0	0	0	0	0	0	0	0	0
Q9P016	0	0	0	0	0	0	0	0	0	0	0	0	0	0	0	0	0	0	0	0	0	0	0	0	0	0	0	0	0	0	0	0	0	0	0	0	0	0	0	0	0	0	0	0	0	0	0	0	0
Q03519	0	0	0	0	0	0	0	0	0	0	0	0	0	0	0	0	0	0	0	0	0	0	0	0	0	0	0	0	0	0	0	0	0	0	0	0	0	0	0	0	0	0	0	0	0	0	0	0	0
O43615	0	0	0	0	0	0	0	0	0	0	0	0	0	0	0	0	0	0	0	0	0	0	0	0	0	0	0	0	0	0	0	0	0	0	0	0	0	0	0	0	0	0	0	0	0	0	0	0	0
P62495	0	0	0	0	0	0	0	0	0	0	0	0	0	0	0	0	0	0	0	0	0	0	0	0	0	0	0	0	0	0	0	0	0	0	0	0	0	0	0	0	0	0	0	0	0	0	0	0	0
Q9BSH5	0	0	0	0	0	0	0	0	0	0	0	0	0	0	0	0	0	0	0	0	0	0	0	0	0	0	0	0	0	0	0	0	0	0	0	0	0	0	0	0	0	0	0	0	0	0	0	0	0
P41240	0	0	0	0	0	0	0	0	0	0	0	0	0	0	0	0	0	-0.80825	0	0	0	0	0	0	0	0	0	0	0	0	0	0	0	0	0	0	0	0	0	0	0	0	0	0	0	0	0	0	0
P53990	0	0	0	0	0	0	0	0	0	0	0	0	0	0	0	0	0	0	0	0	0	0	0	0	0	0	0	-0.82432	0	0	0	0	0	0	0	0	0	0	0	0	0	0	0	0	0	0	0	0	0
O43175	0	0	0	0	0	0	0	0	0	0	0	0	0	0	0	0	0	0	0	0	0	0	0	0	0	0	0	0	0	0	0	0	0	0	0	0	0	0	0	0	0	0	0	0	0	0	0	0	0
O75832	0	0	0	0	0	0	0	0	0	0	0	0	0	0	0	0	0	0	0	0	0	0	0	0	0	0	0	0	0	0	0	0	0	0	0	0	0	0	0	0	0	0	0	0	0	0	0	0	0
P46109	0	0	0	0	0	0	0	0	0	0	0	0	0	0	0	0	0	0	0	0	0	0	0	0	0	0	0	0	0	0	0	0	0	0	0	0	0	0	0	0	0	0	0	0	0	0	0	0	0
P55795	0	0	0	0	0	0	0	0	0	0	0	0	0	0	0	0	0	0	0	0	0	0	0	0	0	0	0	0	0	0	0	0	0	0	0	0	0	0	0	0	0	0	0	0	0	0	0	0	0
Q8N1G4	0	0	0	0	0	0	0	0	0	0	0	0	0	0	0	0	0	0	0	0	0	0	0	0	0	0	0	0	0	0	0	0	0	0	0	0	0	0	0	0	0	0	0	0	0	0	0	0	0
Q00059	0	0	0	0	0	0	0	0	0	0	0	0	0	0	0	0	0	0	0	0	0	0	0	0	0	0	0	0	0	0	0	0	0	0	0	0	0	0	0	0	0	0	0	0	0	0	0	0	0
O00182	0	0	0	0	0	0	0	0	0	0	0	0	0	0	0	0	0	0	0	0	0	0	0	0	0	0	0	0	0	0	0	0	0	0	0	0	0	0	0	0	0	0	0	0	0	0	0	0	0
O96000	0	0	0	0	0	0	0	0	0	0	0	0	0	0	0	0	0	0	0	0	0	0	0	0	0	0	0	0	0	0	0	0	0	0	0	0	0	0	0	0	0	0	0	0	0	0	0	0	0
O00264	0	0	0	0	0	0	0	0	0	0	0	0	0	0	0	0	0	0	0	0	0	0	0	0	0	0	0	0	0	0	0	0	0	0	0	0	0	0	0	0	0	0	0	0	0	0	0	0	0
Q96I24	0	0	0	0	0	0	0	0	0	0	0	0	0	0	0	0	0	0	0	0	0	0	0	0	0	0	0	-0.83517	0	0	0	0	0	0	0	0	0	0	0	0	0	0	0	0	0	0	0	0	0
Q9UNF0	0	0	0	0	0	0	0	0	0	0	0	0	0	0	0	0	0	0	0	0	0	0	0	0	0	0	0	-0.84874	0	0	0	0	0	0	0	0	0	0	0	0	0	0	0	0	0	0	0	0	0
O60884	0	0	0	0	0	0	0	0	0	0	0	0	0	0	0	0	0	-0.83235	-0.81195	0	0	0	0	0	0	0	0	-0.85871	0	0	0	0	0	0	0	0	0	0	0	0	0	0	0	0	0	0	0	0	0
P15311	0	0	0	0	0	0	0	0	0	0	0	0	0	0	0	0	0	-0.8165	-0.81039	0	0	0	0	0	0	0	0	-0.85455	0	0	0	0	0	0	0	0	0	0	0	0	0	0	0	0	0	0	0	0	0
P41227	0	0	0	0	0	0	0	0	0	0	0	0	0	0	0	0	0	0	0	0	0	0	0	0	0	0	0	-0.87572	0	0	0	0	0	0	0	0	0	0	0	0	0	0	0	0	0	0	0	0	0
Q15020	0	0	0	0	0	0	0	0	0	0	0	0	0	0	0	0	0	0	0	0	0	0	0	0	0	0	0	-0.80862	0	0	0	0	0	0	0	0	0	0	0	0	0	0	0	0	0	0	0	0	0
Q8WXF1	0	0	0	0	0	0	0	0	0	0	0	0	0	0	0	0	0	0	0	0	0	0	0	0	0	0	0	-0.83901	0	0	0	0	0	0	0	0	0	0	0	0	0	0	0	0	0	0	0	0	0
Q9BQA1	0	0	0	0	0	0	0	0	0	0	0	0	0	0	0	0	0	0	0	0	0	0	0	0	0	0	0	-0.83238	0	0	0	0	0	0	0	0	0	0	0	0	0	0	0	0	0	0	0	0	0
O00743	0	0	0	0	0	0	0	0	0	0	0	0	0	0	0	0	0	0	0	0	0	0	0	0	0	0	0	-0.92031	0	0	0	0	0	0	0	0	0	0	0	0	0	0	0	0	0	0	0	0	0
Q5R3I4	0	0	0	0	0	0	0	0	0	0	0	0	0	0	0	0	0	0	0	0	0	0	0	0	0	0	0	-0.84597	0	0	0	0	0	0	0	0	0	0	0	0	0	0	0	0	0	0	0	0	0
Q9Y277	0	0	0	0	0	0	0	0	0	0	0	0	0	0	0	0	0	0	0	0	0	0	0	0	0	0	0	0	0	0	0	0	0	0	0	0	0	0	0	0	0	0	0	0	0	0	0	0	0
O00534	0	0	0	0	0	0	0	0	0	0	0	0	0	0	0	0	0	0	0	0	0	0	0	0	0	0	0	0	0	0	0	0	0	0	0	0	0	0	0	0	0	0	0	0	0	0	0	0	0
Q7L2H7	0	0	0	0	0	0	0	0	0	0	0	0	0	0	0	0	0	0	0	0	0	0	0	0	0	0	0	0	0	0	0	0	0	0	0	0	0	0	0	0	0	0	0	0	0	0	0	0	0
P05166	0	0	0	0	0	0	0	0	0	0	0	0	0	0	0	0	0	0	0	0	0	0	0	0	0	0	0	0	0	0	0	0	0	0	0	0	0	0	0	0	0	0	0	0	0	0	0	0	0
Q06210	0	0	0	0	0	0	0	0	0	0	0	0	0	0	0	0	0	0	0	0	0	0	0	0	0	0	0	-0.83813	0	0	0	0	0	0	0	0	0	0	0	0	0	0	0	0	0	0	0	0	0
Q9BT78	0	0	0	0	0	0	0	0	0	0	0	0	0	0	0	0	0	0	0	-0.83752	0	0	0	0	0	0	0	-0.88	0	0	0	0	-0.80905	0	0	0	0	0	0	0	0	0	0	0	0	0	0	0	0
O94925	0	0	0	0	0	0	0	0	0	0	0	0	0	0	0	0	0	0	0	0	0	0	0	0	0	0	0	0	0	0	0	0	0	0	0	0	0	0	0	0	0	0	0	0	0	0	0	0	0
P12955	0	0	0	0	0	0	0	0	0	0	0	0	0	0	0	0	0	0	0	0	0	0	0	0	0	0	0	0	0	0	0	0	0	0	0	0	0	0	0	0	0	0	0	0	0	0	0	0	0
Q96PK6	0	0	0	0	0	0	0	0	0	0	0	0	0	0	0	0	0	0	0	0	0	0	0	0	0	0	0	0	0	0	0	0	0	0	0	0	0	0	0	0	0	0	0	0	0	0	0	0	0
P61313	0	0	0	0	0	0	0	0	0	0	0	0	0	0	0	0	0	0	0	0	0	0	0	0	0	0	0	0	0	0	0	0	0	0	0	0	0	0	0	0	0	0	0	0	0	0	0	0	0
Q8N163	0	0	0	0	0	0	0	0	0	0	0	0	0	0	0	0	0	0	0	0	0	0	0	0	0	0	0	0	0	0	0	0	0	0	0	0	0	0	0	0	0	0	0	0	0	0	0	0	0
Q9ULA0	0	0	0	0	0	0	0	0	0	0	0	0	0	0	0	0	0	0	0	0	0	0	0	0	0	0	0	0	0	0	0	0	0	0	0	0	0	0	0	0	0	0	0	0	0	0	0	0	0
P09668	0	0	0	0	0	0	0	0	0	0	0	0	0	0	0	0	0	0	0	0	0	0	0	0	0	0	0	0	0	0	0	0	0	0	0	0	0	0	0	0	0	0	0	0	0	0	0	0	0
O75131	0	0	0	0	0	0	0	0	0	0	0	0	0	0	0	0	0	0	0	0	0	0	0	0	0	0	0	0	0	0	0	0	0	0	0	0	0	0	0	0	0	0	0	0	0	0	0	0	0
P49721	0	0	0	0	0	0	0	0	0	0	0	0	0	0	0	0	0	0	0	0	0	0	0	0	0	0	0	0	0	0	0	0	0	0	0	0	0	0	0	0	0	0	0	0	0	0	0	0	0
P53367	0	0	0	0	0	0	0	0	0	0	0	0	-0.82852	0	0	0	0	0	0	0	0	0	0	0	0	0	0	0	-0.80336	0	0	0	0	0	0	0	0	0	0	0	0	0	0	0	0	0	0	0	0
Q02750	0	0	0	0	0	0	0	0	0	0	0	0	-0.80319	0	0	0	-0.81553	0	0	0	0	0	0	0	0	0	0	0	0	0	0	0	0	0	0	0	0	0	0	0	0	0	0	0	0	0	0	0	0
O94874	0	0	0	0	0	0	0	0	0	0	0	0	-0.81255	0	0	0	0	0	0	0	0	0	0	0	0	0	0	0	0	0	0	0	0	0	0	0	0	0	0	0	0	0	0	0	0	0	0	0	0
P67870	0	0	0	0	0	0	0	0	0	0	0	0	0	0	0	0	0	0	0	0	0	0	0	0	0	0	0	0	0	0	0	0	0	0	0	0	0	0	0	0	0	0	0	0	0	0	0	0	0
Q9UKK9	0	0	0	0	0	0	0	0	0	0	0	0	0	0	0	-0.80304	-0.80421	0	0	0	0	0	0	0	0	0	0	0	0	0	0	0	0	0	0	0	0	0	0	0	0	0	0	0	0	0	0	0	0
P23588	0	0	0	0	0	0	0	0	0	0	0	0	0	0	0	0	0	0	0	0	0	0	0	0	0	0	0	0	0	0	0	0	0	0	0	0	0	0	0	0	0	0	0	0	0	0	0	0	0
O75844	0	0	0	0	0	0	0	0	0	0	0	0	0	0	0	0	0	0	0	0	0	0	0	0	0	0	0	0	0	0	0	0	0	0	0	0	0	0	0	0	0	0	0	0	0	0	0	0	0
P63279	0	0	0	0	0	0	0	0	0	0	0	0	0	0	0	0	0	0	0	0	0	0	0	0	0	0	0	0	0	0	0	0	0	0	0	0	0	0	0	0	0	0	0	0	0	0	0	0	0
O60762	0	0	0	0	0	0	0	0	0	0	0	0	0	0	0	0	0	0	0	0	0	0	0	0	0	0	0	0	0	0	0	0	0	0	0	0	0	0	0	0	0	0	0	0	0	0	0	0	0
Q9Y285	0	0	0	0	0	0	0	0	0	0	0	0	0	0	0	0	0	0	0	0	0	0	0	0	0	0	0	0	0	0	0	0	0	0	0	0	0	0	0	0	0	0	0	0	0	0	0	0	0
Q8NBQ5	0	0	0	0	0	0	0	0	0	0	0	0	0	0	0	0	0	0	0	0	0	0	0	0	0	0	0	0	0	0	0	0	0	0	0	0	0	0	0	0	0	0	0	0	0	0	0	0	0
O15533	0	0	0	0	0	0	0	0	0	0	0	0	0	0	0	0	0	0	0	0	0	0	0	0	0	0	0	0	0	0	0	0	0	0	0	0	0	0	0	0	0	0	0	0	0	0	0	0	0
P46778	0	0	0	0	0	0	0	0	0	0	0	0	0	0	0	0	0	0	0	0	0	0	0	0	0	0	0	0	0	0	0	0	0	0	0	0	0	0	0	0	0	0	0	0	0	0	0	0	0
P30405	0	0	0	0	0	0	0	0	0	0	0	0	0	0	0	0	0	0	0	0	0	0	0	0	0	0	0	0	0	0	0	0	0	0	0	0	0	0	0	0	0	0	0	0	0	0	0	0	0
Q9Y4Z0	0	0	0	0	0	0	0	0	0	0	0	0	0	0	0	0	0	0	0	0	0	0	0	0	0	0	0	0	0	0	0	0	0	0	0	0	0	0	0	0	0	0	0	0	0	0	0	0	0
Q7Z6Z7	0	0	0	0	0	0	0	0	0	0	0	0	0	0	0	-0.82408	-0.80143	0	0	0	0	0	0	0	0	0	0	0	0	0	0	0	0	0	0	0	0	0	0	0	0	0	0	0	0	0	0	0	0
P28070	0	0	0	0	0	0	0	0	0	0	0	0	0	0	0	0	0	0	0	0	0	0	0	0	0	0	0	0	0	0	0	0	0	0	0	0	0	0	0	0	0	0	0	0	0	0	0	0	0
Q13177	0	0	0	0	0	0	0	0	0	0	0	0	0	0	0	0	0	0	0	0	0	0	0	0	0	0	0	0	0	0	0	0	0	0	0	0	0	0	0	0	0	0	0	0	0	0	0	0	0
Q9NZ08	0	0	0	0	0	0	0	0	0	0	0	0	0	0	0	0	0	0	0	0	0	0	0	0	0	0	0	0	0	0	0	0	0	0	0	0	0	0	0	0	0	0	0	0	0	0	0	0	0
Q13217	0	0	0	0	0	0	0	0	0	0	0	0	0	0	0	0	0	0	0	0	0	0	0	0	0	0	0	0	0	0	0	0	0	0	0	0	0	0	0	0	0	0	0	0	0	0	0	0	0
Q9HAB8	0	0	0	0	0	0	0	0	0	0	0	0	0	0	0	0	0	0	0	0	0	0	0	0	0	0	0	0	0	0	0	0	0	0	0	0	0	0	0	0	0	0	0	0	0	0	0	0	0
P42330	0	0	0	0	0	0	0	0	0	0	0	0	0	0	0	0	0	0	0	0	0	0	0	0	0	0	0	0	0	0	0	0	0	0	0	0	0	0	0	0	0	0	0	0	0	0	0	0	0
P60983	0	0	0	0	0	0	0	0	0	0	0	0	0	0	0	0	0	0	0	0	0	0	0	0	0	0	0	0	0	0	0	0	0	0	0	0	0	0	0	0	0	0	0	0	0	0	0	0	0
Q9BRG1	0	0	0	0	0	0	0	0	0	0	0	0	0	0	0	0	0	0	0	0	0	0	0	0	0	0	0	0	0	0	0	0	0	0	0	0	0	0	0	0	0	0	0	0	0	0	0	0	0
O75937	0	0	0	0	0	0	0	0	0	0	0	0	0	0	0	0	0	0	0	0	0	0	0	0	0	0	0	0	0	0	0	0	0	0	0	0	0	0	0	0	0	0	0	0	0	0	0	0	0
Q13428	0	0	0	0	0	0	0	0	0	0	0	0	0	0	0	0	0	0	0	0	0	0	0	0	0	0	0	0	0	0	0	0	0	0	0	0	0	0	0	0	0	0	0	0	0	0	0	0	0
P36405	0	0	0	0	0	0	0	0	0	0	0	0	0	0	0	0	0	0	0	0	0	0	0	0	0	0	0	0	0	0	0	0	0	0	0	0	0	0	0	0	0	0	0	0	0	0	0	0	0
P49902	0	0	0	0	0	0	0	0	0	0	0	0	0	0	0	0	0	0	0	0	0	0	0	0	0	0	0	0	0	0	0	0	0	0	0	0	0	0	0	0	0	0	0	0	0	0	0	0	0
Q7L5N1	0	0	0	0	0	0	0	0	0	0	0	0	0	0	0	0	0	0	0	0	0	0	0	0	0	0	0	0	0	0	0	0	0	0	0	0	0	0	0	0	0	0	0	0	0	0	0	0	0
Q8WW12	0	0	0	0	0	0	0	0	0	0	0	0	0	0	0	0	0	0	0	0	0	0	0	0	0	0	0	0	0	0	0	0	0	0	0	0	0	0	0	0	0	0	0	0	0	0	0	0	0
P15927	0	0	0	0	0	0	0	0	0	0	0	0	0	0	0	0	0	0	0	0	0	0	0	0	0	0	0	0	0	0	0	0	0	0	0	0	0	0	0	0	0	0	0	0	0	0	0	0	0
Q9Y6E2	0	0	0	0	0	0	0	0	0	0	0	0	0	0	0	0	0	0	0	0	0	0	0	0	0	0	0	0	0	0	0	0	0	0	0	0	0	0	0	0	0	0	0	0	0	0	0	0	0
O00629	0	0	0	0	0	0	0	0	0	0	0	0	0	0	0	0	0	0	0	0	0	0	0	0	0	0	0	0	0	0	0	0	0	0	0	0	0	0	0	0	0	0	0	0	0	0	0	0	0
Q9P0S9	0	0	0	0	0	0	0	0	0	0	0	0	0	0	0	0	0	0	0	0	0	0	0	0	0	0	0	0	0	0	0	0	0	0	0	0	0	0	0	0	0	0	0	0	0	0	0	0	0
O60925	0	0	0	0	0	0	0	0	0	0	0	0	0	0	0	0	0	0	0	0	0	0	0	0	0	0	0	0	0	0	0	0	0	0	0	0	0	0	0	0	0	0	0	0	0	0	0	0	0
P48556	0	0	0	0	0	0	0	0	0	0	0	0	0	0	0	0	0	0	0	0	0	0	0	0	0	0	0	0	0	0	0	0	0	0	0	0	0	0	0	0	0	0	0	0	0	0	0	0	0
Q15046	0	0	0	0	0	0	0	0	0	0	0	0	0	0	0	0	0	0	0	0	0	0	0	0	0	0	0	0	0	0	0	0	0	0	0	0	0	0	0	0	0	0	0	0	0	0	0	0	0
P50583	0	0	0	0	0	0	0	0	0	0	0	0	0	0	0	0	0	0	0	0	0	0	0	0	0	0	0	0	0	0	0	0	0	0	0	0	0	0	0	0	0	0	0	0	0	0	0	0	0
P37198	0	0	0	0	0	0	0	0	0	0	0	0	0	0	0	0	0	0	0	0	0	0	0	0	0	0	0	0	0	0	0	0	0	0	0	0	0	0	0	0	0	0	0	0	0	0	0	0	0
Q3ZCQ8	0	0	0	0	0	0	0	0	0	0	0	0	0	0	0	0	0	0	0	0	0	0	0	0	0	0	0	0	0	0	0	0	0	0	0	0	0	0	0	0	0	0	0	0	0	0	0	0	0
O43684	0	0	0	0	0	0	0	0	0	0	0	0	0	0	0	0	0	0	0	0	0	0	0	0	0	0	0	0	0	0	0	0	0	0	0	0	0	0	0	0	0	0	0	0	0	0	0	0	0
Q92890	0	0	0	0	0	0	0	0	0	0	0	0	0	0	0	0	0	0	0	0	0	0	0	0	0	0	0	0	0	0	0	0	0	0	0	0	0	0	0	0	0	0	0	0	0	0	0	0	0
Q9C0C2	0	0	0	0	0	0	0	0	0	0	0	0	0	0	0	0	0	0	0	0	0	0	0	0	0	0	0	0	0	0	0	0	0	0	0	0	0	0	0	0	0	0	0	0	0	0	0	0	0
Q13057	0	0	0	0	0	0	0	0	0	0	0	0	0	0	0	0	0	0	0	0	0	0	0	0	0	0	0	0	0	0	0	0	0	0	0	0	0	0	0	0	0	0	0	0	0	0	0	0	0
Q9UHD1	0	0	0	0	0	0	0	0	0	0	0	0	0	0	0	0	0	0	0	0	0	0	0	0	0	0	0	0	0	0	0	0	0	0	0	0	0	0	0	0	0	0	0	0	0	0	0	0	0
Q9UKM9	0	0	0	0	0	0	0	0	0	0	0	0	0	0	0	0	0	0	0	0	0	0	0	0	0	0	0	0	0	0	0	0	0	0	0	0	0	0	0	0	0	0	0	0	0	0	0	0	0
P10155	0	0	0	0	0	0	0	0	0	0	0	0	0	0	0	0	0	0	0	0	0	0	0	0	0	0	0	0	0	0	0	0	0	0	0	0	0	0	0	0	0	0	0	0	0	0	0	0	0
P17858	0	0	0	0	0	0	0	0	0	0	0	0	0	0	0	0	0	0	0	0	0	0	0	0	0	0	0	0	0	0	0	0	0	0	0	0	0	0	0	0	0	0	0	0	0	0	0	0	0
O60869	0	0	0	0	0	0	0	0	0	0	0	0	0	0	0	0	0	0	0	0	0	0	0	0	0	0	0	0	0	0	0	0	0	0	0	0	0	0	0	0	0	0	0	0	0	0	0	0	0
Q7Z4V5	0	0	0	0	0	0	0	0	0	0	0	0	0	0	0	0	0	0	0	0	0	0	0	0	0	0	0	0	0	0	0	0	0	0	0	0	0	0	0	0	0	0	0	0	0	0	0	0	0
Q9NP72	0	0	0	0	0	0	0	0	0	0	0	0	0	0	0	0	0	0	0	0	0	0	0	0	0	0	0	0	0	0	0	0	0	0	0	0	0	0	0	0	0	0	0	0	0	0	0	0	0
Q9NZJ9	0	0	0	0	0	0	0	0	0	0	0	0	0	0	0	0	0	0	0	0	0	0	0	0	0	0	0	0	0	0	0	0	0	0	0	0	0	0	0	0	0	0	0	0	0	0	0	0	0
O95168	0	-0.81037	0	-0.81562	0	0	0	0	0	0	0	0	0	0	0	0	0	0	0	0	0	0	0	0	0	0	0	-0.80253	0	0	0	0	0	0	0	0	0	0	0	0	0	0	0	0	0	0	0	0	0
P09622	0	-0.81459	0	0	0	0	0	0	0	0	0	0	0	0	0	0	0	0	0	0	0	0	0	0	0	0	0	0	0	0	0	0	0	0	0	0	0	0	0	0	0	0	0	0	0	0	-0.80249	0	0
P14854	0	0	0	0	0	0	0	0	0	0	0	0	0	0	0	0	0	0	0	0	0	0	0	0	0	0	0	0	0	0	0	0	0	0	0	0	0	0	0	0	0	0	0	0	0	0	0	0	0
O95319	0	0	0	0	0	0	0	0	0	0	0	0	0	0	0	0	0	0	0	0	0	0	0	0	0	0	-0.80645	0	0	0	0	0	0	0	0	0	0	0	0	0	0	0	0	0	0	0	0	0	0
Q9NP81	0	0	0	0	0	0	0	0	0	0	0	0	0	0	0	0	0	0	0	0	0	0	0	0	0	0	0	0	0	0	0	0	0	0	0	0	0	0	0	0	0	0	0	0	0	0	0	0	0
P30504	0	0	0	0	0	0	0	0	0	0	0	0	0	0	0	0	0	0	0	0	0	0	0	0	0	0	0	0	0	0	0	0	0	0	0	0	0	0	0	0	0	0	0	0	0	0	0	0	0
Q14566	0	0	0	0	0	0	0	0	0	0	0	0	0	0	0	0	0	0	0	0	0	0	0	0	0	0	0	0	0	0	0	0	0	0	0	0	0	0	0	0	0	0	0	0	0	0	0	0	0
Q9BUH6	0	-0.80092	0	0	-0.85246	0	-0.83029	-0.8262	0	-0.82254	-0.81662	-0.85767	-0.8632	-0.83965	0	0	0	0	0	0	0	0	0	0	0	0	0	0	0	0	0	0	0	0	0	0	0	0	0	0	0	0	0	0	0	0	0	0	0
P48960	0	-0.80635	0	0	0	0	0	0	0	0	0	0	0	0	0	0	0	0	0	0	0	0	0	0	0	0	0	0	0	0	0	0	0	0	0	0	0	0	0	0	0	0	0	0	0	0	0	0	0
P62854	0	0	0	0	0	0	0	0	0	0	0	0	0	0	0	0	0	0	0	0	0	0	0	0	0	0	0	0	0	0	0	0	0	0	0	0	0	0	0	0	0	0	0	0	0	0	0	0	0
Q96A33	0	0	0	0	0	0	-0.8178	-0.83502	0	-0.82715	0	-0.84003	-0.87469	-0.85622	0	-0.81739	-0.81381	0	0	0	0	0	0	0	0	0	0	0	0	0	0	0	0	0	0	0	0	0	0	0	0	0	0	0	0	0	0	0	0
O14744	0	0	0	0	0	0	0	0	0	0	0	0	0	0	0	0	0	0	0	0	0	0	0	0	0	0	0	0	0	0	0	0	0	0	0	0	0	0	0	0	0	0	0	0	0	0	0	0	0
Q8N684	0	0	0	0	0	0	0	0	0	0	0	0	0	0	0	0	0	0	0	0	0	0	0	0	0	0	0	0	0	0	0	0	0	0	0	0	0	0	0	0	0	0	0	0	0	0	0	0	0
Q96CN7	0	0	0	0	0	0	0	0	0	0	0	0	0	0	0	0	0	0	0	0	0	0	0	0	0	0	0	0	0	0	0	0	0	0	0	0	0	0	0	0	0	0	0	0	0	0	0	0	0
Q9NUP9	0	0	0	0	0	0	0	0	0	0	0	0	0	0	0	0	0	0	0	0	0	0	0	0	0	0	0	0	0	0	0	0	0	0	0	0	0	0	0	0	0	0	0	0	0	0	0	0	0
O15355	0	0	0	0	0	0	0	0	0	0	0	0	0	0	0	0	0	0	0	0	0	0	0	0	0	0	0	0	0	0	0	0	0	0	0	0	0	0	0	0	0	0	0	0	0	0	0	0	0
P55957	0	0	0	0	0	0	0	0	0	0	0	0	0	0	0	0	0	0	0	0	0	0	0	0	0	0	0	0	0	0	0	0	0	0	0	0	0	0	0	0	0	0	0	0	0	0	0	0	0
Q9UHY7	0	0	0	0	0	0	0	0	0	0	0	0	0	0	0	0	0	0	0	0	0	0	0	0	0	0	0	0	0	0	0	0	0	0	0	0	0	0	0	0	0	0	0	0	0	0	0	0	0
Q9Y295	0	0	0	0	0	0	0	0	0	0	0	0	0	0	0	0	0	0	0	0	0	0	0	0	0	0	0	0	0	0	0	0	0	0	0	0	0	0	0	0	0	0	0	0	0	0	0	0	0
P53384	0	0	0	0	0	0	0	0	0	0	0	0	0	0	0	0	0	0	0	0	0	0	0	0	0	0	0	0	0	0	0	0	0	0	0	0	0	0	0	0	0	0	0	0	0	0	0	0	0
Q96FJ2	0	0	0	0	0	0	0	0	0	0	0	0	0	0	0	0	0	0	0	0	0	0	0	0	0	0	0	-0.80202	0	0	0	0	0	0	0	0	0	0	0	0	0	0	0	0	0	0	0	0	0
Q9HA64	0	0	0	0	0	0	0	0	0	0	0	0	0	0	0	0	0	0	0	0	0	0	0	0	0	0	0	0	0	0	0	0	0	0	0	0	0	0	0	0	0	0	0	0	0	0	0	0	0
P46060	0	0	0	0	0	0	0	0	0	0	0	0	0	0	0	0	0	0	0	0	0	0	0	0	0	0	0	0	0	0	0	0	0	0	0	0	0	0	0	0	0	0	0	0	0	0	0	0	0
P35813	0	0	0	0	0	0	0	0	0	0	0	0	0	0	0	0	0	0	0	0	0	0	0	0	0	0	0	0	0	0	0	0	0	0	0	0	0	0	0	0	0	0	0	0	0	0	0	0	0
Q92878	0	0	0	0	0	0	0	0	0	0	0	0	0	0	0	0	0	0	0	0	0	0	0	0	0	0	0	0	0	0	0	0	0	0	0	0	0	0	0	0	0	0	0	0	0	0	0	0	0
Q9NX55	0	0	0	0	0	0	0	0	0	0	0	0	0	0	0	0	0	0	0	0	0	0	0	0	0	0	0	0	0	0	0	0	0	0	0	0	0	0	0	0	0	0	0	0	0	0	0	0	0
O95292	0	0	0	0	0	0	0	0	0	0	0	0	0	0	0	0	0	0	0	0	0	0	0	0	0	0	0	0	0	0	0	0	0	0	0	0	0	0	0	0	0	0	0	0	0	0	0	0	0
Q16576	0	0	0	0	0	0	0	0	0	0	0	0	0	0	0	0	0	0	0	0	0	0	0	0	0	0	0	0	0	0	0	0	0	0	0	0	0	0	0	0	0	0	0	0	0	0	0	0	0
P09327	0	0	0	0	0	0	0	0	0	0	0	0	0	0	0	0	0	0	0	0	0	0	0	0	0	0	0	0	0	0	0	0	0	0	0	0	0	0	0	0	0	0	0	0	0	0	0	0	0
P26440	0	0	0	0	0	0	0	0	0	0	0	0	0	0	0	0	0	0	0	0	0	0	0	0	0	0	0	0	0	0	0	0	0	0	0	0	0	0	0	0	0	0	0	0	0	0	0	0	0
Q15738	-0.81131	0	0	-0.81328	0	0	-0.82905	-0.84717	-0.83126	-0.84475	-0.84638	-0.85605	-0.82808	-0.85647	0	0	-0.82374	-0.81241	0	0	0	0	0	0	0	0	0	0	0	0	0	0	0	0	0	0	-0.82123	0	0	0	0	0	0	0	0	0	0	0	0
P35613	0	0	0	0	0	0	-0.8195	-0.84111	0	-0.8707	0	0	-0.83339	-0.89554	-0.84129	0	0	0	-0.8006	-0.81349	-0.88672	-0.82279	-0.91452	0	0	0	0	0	0	0	0	0	-0.80892	0	0	-0.83693	0	-0.81273	-0.84262	0	0	0	0	0	0	0	0	0	0
P47813	0	0	0	0	0	0	0	0	0	0	0	0	0	0	0	0	0	0	-0.80205	0	0	0	0	0	0	0	0	0	0	0	0	0	-0.80402	0	0	0	0	0	0	0	0	0	0	0	0	0	0	0	0
Q9P2B2	0	0	0	0	0	0	0	0	0	0	0	0	0	0	-0.85414	0	0	0	0	-0.83762	0	-0.84491	0	0	0	0	0	0	0	0	0	0	-0.83824	0	0	-0.852	0	0	0	0	-0.83164	0	0	0	0	0	0	0	0
P51610	0	0	0	0	0	0	0	0	0	0	0	0	0	0	0	0	0	0	0	0	0	0	0	0	0	0	0	0	0	0	0	0	0	0	0	0	0	0	0	0	0	0	0	0	0	0	0	0	0
Q96SB4	0	0	0	0	0	0	0	0	0	0	0	0	0	0	0	0	0	0	0	0	0	0	0	0	0	0	0	0	0	0	0	0	0	0	0	0	0	0	0	0	0	0	0	0	0	0	0	0	0
P16444	0	0	0	0	0	-0.81683	0	0	0	0	0	-0.82245	0	0	0	0	0	0	0	0	0	0	0	0	0	0	0	0	0	0	0	0	0	0	0	0	0	0	0	0	0	0	0	0	0	0	0	0	0
Q53H96	0	0	0	0	0	0	0	-0.8003	0	0	0	0	0	0	0	0	0	0	0	0	0	0	0	0	0	0	0	0	0	0	0	0	0	0	0	0	0	0	0	0	0	0	0	0	0	0	0	0	0
N-Acetyl-serine	0	0	0	0	0	0	-0.83035	-0.8577	-0.82406	-0.87343	-0.81818	-0.83835	0	-0.85176	0	-0.80057	-0.82788	0	0	0	-0.84888	0	0	0	0	0	0	0	0	0	0	0	0	0	0	0	0	0	0	0	0	0	0	0	0	0	0	0	0
P06731	0	-0.84133	-0.84424	-0.80545	0	-0.80376	0	0	0	0	0	0	0	0	0	0	0	0	0	0	0	0	0	0	0	0	0	0	0	0	0	0	0	0	0	0	0	0	0	0	0	-0.86311	-0.91678	-0.90182	-0.93549	-0.83324	-0.88489	0	-0.82534
P07108	0	0	0	0	0	-0.84082	0	0	0	0	0	0	0	0	0	0	0	0	0	0	0	0	0	0	0	0	0	0	0	0	0	0	0	0	0	0	0	0	0	0	0	0	0	0	0	0	0	0	0
O43172	0	0	0	0	0	0	0	0	0	0	0	0	0	0	0	0	0	0	0	0	0	0	0	0	0	0	0	0	0	0	0	0	0	0	0	0	0	0	0	0	0	0	0	-0.83426	0	0	0	0	0
Q08J23	0	0	0	0	0	-0.8188	0	0	0	0	0	0	0	0	0	0	0	0	0	0	0	0	0	0	0	0	0	0	0	0	0	0	0	0	0	0	0	0	0	0	0	0	0	0	0	0	0	0	0
Q8N766	0	0	0	0	0	0	0	0	0	0	0	0	0	0	0	0	0	0	0	0	0	0	0	0	0	0	0	0	0	0	0	0	0	0	0	0	0	0	0	0	0	0	0	0	0	0	0	0	0
Q9UNS2	0	0	0	0	0	0	0	0	0	0	0	0	0	0	0	0	0	0	0	0	0	0	0	0	0	0	0	0	0	0	0	0	0	0	0	0	0	0	0	0	0	0	0	0	0	0	0	0	0
Q9H910	0	0	0	0	0	0	0	0	0	0	0	0	0	0	0	0	0	0	0	0	0	0	0	0	0	0	0	0	0	0	0	0	0	0	0	0	0	0	0	0	0	0	0	0	0	0	0	0	0
Q9UMR2	0	0	0	0	0	0	0	0	0	0	0	0	0	0	0	0	0	0	0	0	0	0	0	0	0	0	0	-0.82632	0	0	0	0	0	0	0	0	0	0	0	0	0	0	0	0	0	0	0	0	0
Q02252	0	0	0	0	0	0	0	0	0	0	0	0	0	0	0	0	0	0	0	0	0	0	0	0	0	0	0	0	0	0	0	0	0	0	0	0	0	0	0	0	0	0	0	0	0	0	0	0	0
Q9Y508	0	-0.84744	0	0	0	0	0	0	0	0	0	0	0	0	0	0	0	0	0	0	0	0	0	0	-0.84671	0	0	0	0	0	0	0	0	-0.82952	0	0	0	0	0	-0.87005	0	0	0	0	0	0	0	0	0
Q08623	0	0	0	0	0	0	0	0	0	0	0	0	0	0	0	0	0	0	0	0	0	0	0	0	-0.84204	0	0	0	0	0	0	0	0	0	0	0	0	0	0	0	0	0	0	0	0	0	0	0	0
Q96AT9	-0.91238	0	0	0	0	0	0	0	0	0	0	0	0	0	0	0	0	-0.81079	-0.8318	0	0	0	0	0	0	0	0	0	0	0	0	-0.86796	0	0	0	0	0	-0.80652	-0.82991	-0.85818	0	0	0	0	0	0	0	0	0
Q14232	0	0	0	0	0	0	0	0	0	0	0	0	0	0	0	0	0	0	0	0	0	0	0	0	0	0	0	0	0	0	0	0	0	0	0	0	0	0	0	0	0	0	0	0	0	0	0	0	0
Q99961	0	0	0	0	0	0	0	0	0	0	0	0	0	0	0	0	0	0	0	0	0	0	0	0	0	0	0	0	0	0	0	0	0	0	0	0	0	0	0	0	0	0	0	0	0	0	0	0	0
Q8TAT6	0	0	0	0	0	0	0	0	0	0	0	0	0	0	0	0	0	0	0	0	0	0	0	0	0	0	0	0	0	0	0	0	0	0	0	0	0	0	0	0	0	0	0	0	0	0	0	0	0
Q9UBF2	0	0	0	0	0	0	0	0	0	0	0	0	0	0	0	0	0	0	0	0	0	0	0	0	0	0	0	0	0	0	0	0	0	0	0	0	0	0	0	0	0	0	0	0	0	0	0	0	0
Q8N335	0	0	0	0	0	0	0	0	0	0	0	0	0	0	0	0	0	0	0	0	0	0	0	0	0	0	0	0	0	0	0	0	0	0	0	0	0	0	0	0	0	0	0	0	0	0	0	0	0
Q99795	0	0	0	0	0	0	0	0	0	0	0	0	0	0	0	0	0	0	0	0	0	0	0	0	0	0	0	0	0	0	0	0	0	0	0	0	0	0	0	0	0	0	0	0	0	0	0	0	0
Q9BPW8	0	0	0	0	0	0	0	0	0	0	0	0	0	0	0	0	0	0	0	0	0	0	0	0	0	0	0	0	0	0	0	0	0	0	0	0	0	0	0	0	0	0	0	0	0	0	0	0	0
Q96EK6	0	0	0	0	0	0	0	0	0	0	0	0	0	0	0	0	0	0	0	0	0	0	0	0	0	0	0	0	0	0	0	0	0	0	0	0	0	0	0	0	0	0	0	0	0	0	0	0	0
Q9H9J2	0	0	0	0	0	0	0	0	0	0	0	0	0	0	0	0	0	0	0	0	0	0	0	0	0	0	0	0	0	0	0	0	0	0	0	0	0	0	0	0	0	0	0	0	0	0	0	0	0
2-Hydroxyglutaric	0	0	0	0	0	0	0	0	0	0	0	0	0	0	0	0	0	0	0	0	0	0	0	0	0	0	0.86924	0.84686	0	0	0	0	0	0	0	0	0	0	0	0	0	0	0	0	0	0	0	0	0
1-Monostearin	0	0	0	0	0	0	0	0	0	0	0	0	0	0	0	0	0	0	0	0	0	0	0	0	0	0	0	0.9079	0	0	0	0	0	0	0	0	0	0	0	0	0	0	0	0	0	0	0	0	0
N-Acetylneuraminic	0	0	0	0	0	0	0	0	0	0	0	0	0	0	0	0	0	0	0	0	0	0	0	0	0	0	0	0.81533	0	0	0	0	0	0	0	0	0	0	0	0	0	0	0	0	0	0	0	0	0
Q9UHQ9	0	0	0	0	-0.8138	0	0	0	0	0	0	0	0	0	0	0	0	0	0	0	0	-0.8267	0	0	0	0	0	0	0	0	0	0	0	0	-0.8156	0	0	0	0	0	0	0	0	0	0	0	0	0	0
Q9H583	0	0	0	0	0	0	0	0	0	0	0	0	0	0	0	0	0	0	0	0	0	0	0	0	0	0	0	0	0	0	0	0	0	0	0	0	0	0	0	0	0	0	0	0	0	0	0	0	0
Quinolinic acid	0.86814	0	0	0	0	0	0	0	0	0	0	0	0	0	0	0	0	0	0	0	0	0	0	0	0	0	0	0	0	0.86333	0	0.84206	0	0	0	0	0	0	0	0	0	0	0	0	0	0	0	0	0
Q969Z0	0	-0.86353	0	-0.84125	0	0	0	0	0	0	0	0	0	0	0	0	0	0	0	0	0	0	0	0	0	-0.82006	0	0	0	0	0	0	0	0	0	0	0	0	0	0	0	-0.90227	0	0	0	0	0	0	0
GABA	0	0	0	0	0	0	0	0	0	0	0	0	0.8046	0.8091	0	0	0	0	0	0	0	0	0	0	0	0	0	0	0	0	0	0	0	0	0.83802	0.83113	0	0	0	0	0	0	0	0	0	0	0	0	0
Creatinine	0	0	0	0	0	0	0	0	0	0	0.81312	0	0	0	0	0	0	0	0	0	0.80351	0	0	0	0	0	0	0	0	0.84976	0	0	0	0	0.8627	0	0	0	0	0	0	0	0	0	0	0	0	0	0
P43897	0	0	0	0	0	0	0	0	0	0	0	0	0	0	0	0	0	0	0	0	0	0	0	0	0	0	0	0	0	0	0	0	0	0	0	0	0	0	0	0	0	0	0	0	0	0	0	0	0
Q9NYK5	0	0	0	0	0	0	0	0	0	0	0	0	0	0	0	0	0	0	0	0	0	0	0	0	0	0	0	0	0	0	0	0	0	0	0	0	0	0	0	0	0	0	0	0	0	0	-0.82563	0	0
O75915	0	0	0	0	0	0	0	0	0	0	0	0	0	0	0	0	0	0	0	0	0	0	0	0	0	0	0	0	0	0	0	0	0	0	0	0	0	0	0	0	0	0	0	0	0	0	0	-0.81745	-0.8014
Xylulose	0	0	0	0	0	0	0	0	0	0	0	0	0	0	0	0	0	0	0	0	0	0	0	0	0	0	0	0	0	0	0	0	0	0	0	0	0	0	0	0	0	0	0	0	0	0	0	0	0
3-Aminopropionitri	0	0	0.8512	0	0	0	0	0	0	0	0	0	0	0	0	0	0	0	0	0	0	0	0	0	0	0	0	0	0	0	0	0	0	0	0	0	0	0	0	0	0	0	0.80623	0.84987	0	0.814	0	0	0
Serine	0	0	0	0	0	0	0	0	0	0	0	0	0	0	0	0	0	0	0	0	0	0	0	0	0	0	0	0	0	0	0	0	0	0	0	0	0	0	0	0	0	0	0	0	0	0	0	0	0
P49406	0	0	0	0	0	0	0	0	0	0	0	0	0	0	0	0	0	0	0	0	0	0	0	0	0	0	0	0	0	0	0	0	0	0	0	0	0	0	0	0	0	0	0	0	0	0	0	0	0
Inositol	0	0	0	0	0	0	0	0	0	0	0	0	0	0	0	0	0	0	0	0	0	0	0	0	0	0	0	0	0	0	0	0	0	0	0	0	0	0	0	0	0	0	0	0	0	0	0	0	0
Q9NUU7	0	0	0	0	0	0	0	0	0	0	0	0	0	0	0	0	0	0	0	0	0	0	0	0	0	0	0	0	0	0	0	0	0	0	0.80992	0	0	0	0	0	0	0	0	0	0	0	0	0	0
cStage	0	0	0	0	0	0	0	0	0	0	0	0	0	0	0	0	0	0	0	0	0	0	0	0	0	0	0	0	0	0	0	0	0	0	0	0	0	0	0	0	0	0	0	0	-0.80019	0	0	0	0
BMI	0	0	0	0	0	0	0	0	0	0	0	0	0	0	0	0	0	0	0	0	0	0	0	0	0	0	0	0	0	0	0	0	0	0	0	0	0	0	0	0	0	0	0	0	0	0	0	0	0
Glutamic acid	0	0	0	0	0	0	0	0	0	0	0	0	0	0	0	0	0	0	0	0	0	0	0	0	0	0	0	0	0	0	0	0	0	0	0	0	0	0	0	0	0.8312	0	0	0	0	0	0	0	0
Lactic acid	0	0	0	0	0	0	0	0	0	0	0	0	0	0	0	0	0	0	0	0	0	0	0	0	0	0	0	0	0	0	0	0	0	0	0	0	0	0	0	0	0	0	0	0	0	0	0	0	0
Fructose	0	0	0	0	0	0	0	0	0	0	0	0	0	0	0	0	0	0	0	0	0	0	0	0	0	0	0	0	0	0	0	0	0	0	0	0	0	0	0	0	0	0	0	0	0	0	0	0	0
O60684	0	0	0	0	0	0	0	0	0	0	0	0	0	0	0	0	0	0	0	0	0	0	0	0	0	0	0	0	0	0	0	0	0	0	0	0	0	0	0	0	0	0	0	0	0	0	0	0	0
Q9BVG4	0	0	0	0	0	0	0	0	0	0	0	0	0	0	0	0	0	0	0	0	0	0	0	0	0	0	0	0	0	0	0	0	0	0	0	0	0	0	0	0	0	0	0	0	0	0	0	0	0
FIBR	0	0	0	0	0	0	0	0	0	0	0	0	0	0	0	0	0	0	0	0	0	0	0	0	0	0	0	0	0	0	0	0	0	0	0	0	0	0	0	0	0	0	0	0	0	0	0	0	0
PLT	0	0	0	0	0	0	0	0	0	0	0	0	0	0	0	0	0	0	0	0	0	0	0	0	0	0	0	0	0	0	0	0	0	0	0	0	0	0	0	0	0	0	0	0	0	0	0	0	0
LIMF	0	0	0	0	0	0	0	0	0	0	0	0	0	0	0	0	0	0	0	0	0	0	0	0	0	0	0	0	0	0	0	0	0	0	0	0	0	0	0	0	0	0	0	0	0	0	0	0	0
ypN	0	0	0	0	0	0	0	0	0	0	0	0	0	0	0	0	0	0	0	0	0	0	0	0	0	0	0	0	0	0	0	0	0	0	0	0	0	0	0	0	0	0	0	0	0	0	0	0	0
ypT	0	0	0	0	0	0	0	0	0	0	0	0	0	0	0	0	0	0	0	0	0	0	0	0	0	0	0	0	0	0	0	0	0	0	0	0	0	0	0	0	0	0	0	0	0	0	0	0	0
Uracil	0	0	0	0	0	0	0	0	0	0	0	0	0	0	0	0	0	0	0	0	0	0	0	0	0	0	0	0	0	0	0	0	0	0	0	0	0	0	0	0	0	0	0	0	0	0	0	0	0
Gly-Gly	0	0	0	0	0	0	0	0	0	0	0	0	0	0	0	0	0	0	0	0	0	0	0	0	0	0	0	0	0	0	0	0	0	0	0	0	0	0	0	0	0	0	0	0	0	0	0	0	0
Alpha-Tocopherol	0	0	0	0	0	0	0	0	0	0	0	0	0	0	0	0	0	0	0	0	0	0	0	0	0	0	0	0	0	0	0	0	0	0	0	0	0	0	0	0	0	0	0	0	0	0	0	0	0
1	5-Anhydro-D-gluc	0	0	0	0	0	0	0	0	0	0	0	0	0	0	0	0	0	0	0	0	0	0	0	0	0	0	0	0	0	0	0	0	0	0	0	0	0	0	0	0	0	0	0	0	0	0	0	0
Hypoxanthine	0	0	0	0	0	0	0	0	0	0	0	0	0	0	0	0	0	0	0	0	0	0	0	0	0	0	0	0	0	0	0	0	0	0	0	0	0	0	0	0	0	0	0	0	0	0	0	0	0
Ribose	0	0	0	0	0	0	0	0	0	0	0	0	0	0	0	0	0	0	0	0	0	0	0	0	0	0	0	0	0	0	0	0	0	0	0	0	0	0	0	0	0	0	0	0	0	0	0	0	0
Pyrophosphoric aci	0	0	0	0	0	0	0	0	0	0	0	0	0	0	0	0	0	0	0	0	0	0	0	0	0	0	0	0	0	0	0	0	0	0	0	0	0	0	0	0	0	0	0	0	0	0	0	0	0
Cysteinylglycine	0	0	0	0	0	0	0	0	0	0	0	0	0	0	0	0	0	0	0	0	0	0	0	0	0	0	0	0	0	0	0	0	0	0	0	0	0	0	0	0	0	0	0	0	0	0	0	0	0
Glucose-6-phosphat	0	0	0	0	0	0	0	0	0	0	0	0	0	0	0	0	0	0	0	0	0	0	0	0	0	0	0	0	0	0	0	0	0	0	0	0	0	0	0	0	0	0	0	0	0	0	0	0	0
Cellobiose	0	0	0	0	0	0	0	0	0	0	0	0	0	0	0	0	0	0	0	0	0	0	0	0	0	0	0	0	0	0	0	0	0	0	0	0	0	0	0	0	0	0	0	0	0	0	0	0	0
Ribulose-5-phospha	0	0	0	0	0	0	0	0	0	0	0	0	0	0	0	0	0	0	0	0	0	0	0	0	0	0	0	0	0	0	0	0	0	0	0	0	0	0	0	0	0	0	0	0	0	0	0	0	0
Q9BTW9	0	0	0	0	0	0	0	0	0	0	0	0	0	0	0	0	0	0	0	0	0	0	0	0	0	0	0	0	0	0	0	0	0	0	0	0	0	0	0	0	0	0	0	0	0	0	0	0	0
P10620	0	0	0	0	0	0	0	0	0	0	0	0	0	0	0	0	0	0	0	0	0	0	0	0	0	0	0	0	0	0	0	0	0	0	0	0	0	0	0	0	0	0	0	0	0	0	0	0	0
P41567	0	0	0	0	0	0	0	0	0	0	0	0	0	0	0	0	0	0	0	0	0	0	0	0	0	0	0	0	0	0	0	0	0	0	0	0	0	0	0	0	0	0	0	0	0	0	0	0	0
Spermidine	0	0	0	0	0	0	0	0	0	0	0	0	0	0	0	0	0	0	0	0	0	0	0	0	0	0	0	0	0	0	0	0	0	0	0	0	0	0	0	0.81822	0	0	0	0	0	0	0	0	0
Ornithine	0	0	0	0	0	0	0	0	0	0	0	0	0	0	0	0	0	0	0	0	0	0	0	0	0	0	0	0	0	0	0	0	0	0	0	0	0	0	0	0	0	0	0	0	0	0	0	0	0
Tyrosine	0	0	0	0	0	0	0	0	0	0	0	0	0	0	0	0	0	0	0	0	0	0	0	0	0	0	0	0	0	0	0	0	0	0	0	0	0	0	0	0	0	0	0	0	0	0	0	0	0
Ascorbic acid	0	0	0	0	0	0	0	0	0	0	0	0	0	0	0	0	0	0	0	0	0	0	0	0	0	0	0	0	0	0	0	0	0	0	0	0	0	0	0	0	0	0	0	0	0	0	0	0	0
Dehydroascorbic ac	0	0	0	0	0	0	0	0	0	0	0	0	0	0	0	0	0	0	0	0	0	0	0	0	0	0	0	0	0	0	0	0	0	0	0	0	0	0	0	0	0	0	0	0	0	0	0	0	0
Q9UD71	0	0	0	0	0	0	0	0	0	0	0	0	0	0	0	0	0	0	0	0	0	0	0	0	0	0	0	0	0	0	0	0	0	0	0	0	0	0	0	0	0	0	0	0	0	0	0	0	0
Uridine 5'-diphosp	0	0	0	0	0	0	0	0	0	0	0	0	0	0	0	0	0	0	0	0	0	0	0	0	0	0	0	0	0	0	0	0	0	0	0	0	0	0	0	0	0	0	0	0	0	0	0	0	0.88362
Stearic acid	0	0	0	0	0	0	0	0	0	0	0	0	0	0	0	0	0	0	0	0	0	0	0	0	0	0	0	0	0	0	0	0	0	0	0	0	0	0	0	0	0	0	0	0	0	0	0	0	0.80214
LNY	0	0	0	0	0	0	0	0	0	0	0	0	0	0	0	0	0	0	0	0	0	0	0	0	0	0	0	0	0	0	0	0	0	0	0	0	0	0	0	0	0	0	0	0	0	0	0	0	0.82563
Niacinamide	0	0	0	0	0	0	0	0	0	0	0	0	0	0	0	0	0	0	0	0	0	0	0	0	0	0	0	0	0	0	0	0	0	0	0.83267	0.82452	0.8441	0	0	0	0	0	0	0	0	0	0	0	0
Iditol	0	0	0	0	0	0	0	0	0	0	0	0	0	0	0	0	0	0	0	0	0	0	0	0	0	0	0	0	0	0	0	0	0	0	0	0	0	0	0	0	0	0	0	0	0	0	0	0	0
Glutamine	0	0	0	0	0	0	0	0	0	0	0	0	0	0	0	0	0	0	0	0	0	0	0	0	0	0	0	0	0	0	0	0	0	0	0	0	0	0	0	0	0	0	0	0	0	0	0	0	0
WBC	0	0	0	0	0	0	0	0	0	0	0	0	0	0	0	0	0	0	0	0	0	0	0	0	0	0	0	0	0	0	0	0	0	0	0	0	0	0	0	0	0	0	0	0	0	0	0	0	0
NEUTR	0	0	0	0	0	0	0	0	0	0	0	0	0	0	0	0	0	0	0	0	0	0	0	0	0	0	0	0	0	0	0	0	0	0	0	0	0	0	0	0	0	0	0	0	0	0	0	0	0
Q96A35	0	0	0	0	0	0	0	0	0	0	0	0	0	0	0	0	0	0	0	0	0	0	0	0	0	0	0	0	0	0	0	0	0	0	0	0	0	0	0	0	0	0	0	0	0	0	0	0	0
Tocopherol gamma	0	0	0	0	0	0	0	0	0	0	0	0	0	0	0	0	0	0	0	0	0	0	0	0	0	0	0	0	0	0	0	0	0	0	0	0	0	0	0	0	0	0	0	0	0	0	0	0	0
P01833	0	0	0	0	0	0	0	0	0	0	0	0	0	0	0	0	0	0	0	0	0	0	0	0	0	0	0	0	0	0	0	0	0	0	0	0	0	0	0	0	0	0	0	0	0	0	0	0	0
P14735	0	0	0	0	0	0	0	0	0	0	0	0	0	0	0	0	0	0	0	0	0	0	0	0	0	0	0	0	0	0	0	0	0	0	0	0	0	0	0	0	0	0	0	0	0	0	0	0	0
Glycolic acid	0	0	0	0	0.8046	0	0	0	0	0.80128	0	0	0	0.80924	0	0	0	0	0	0.84117	0.89609	0.83143	0.87989	0	0	0	0	0	0	0	0.82846	0	0	0.84401	0	0	0	0.83026	0	0	0	0	0	0	0	0	0	0	0
Succinic acid	0	0	0	0	0	0	0	0	0	0	0	0	0	0	0	0	0	0	0	0.83925	0	0	0	0	0	0	0	0	0	0	0	0	0.83068	0	0.80417	0	0	0	0	0	0	0	0	0	0	0	0	0	0
Hydroxylamine	0	0	0	0	0	0	0	0	0	0	0	0	0	0.82659	0	0	0	0	0	0.86482	0.85835	0.81508	0.83449	0	0	0	0	0	0	0	0	0	0.85389	0	0.88262	0.84365	0	0.84086	0	0	0	0	0	0	0	0	0	0	0
Glycine	0	0	0	0	0	0	0	0	0	0	0	0	0	0	0	0	0	0	0	0.81235	0.80632	0	0.84025	0	0	0	0	0	0	0	0	0	0	0	0.81856	0.85879	0	0.90442	0	0	0	0	0	0	0	0	0	0	0
Aminomalonate	0	0	0	0	0	0	0	0	0	0	0	0	0	0	0	0	0	0	0	0.80235	0.83131	0.80677	0.81518	0	0	0	0	0	0	0	0	0	0.81899	0	0	0	0	0.81973	0	0	0	0	0	0	0	0	0	0	0
P21217	-0.83955	0	0	-0.81144	0	0	0	0	0	0	0	0	0	0	0	0	0	0	0	0	0	0	0	0	0	0	0	0	0	-0.80191	0	0	0	0	0	0	0	0	0	0	0	0	-0.82726	0	0	0	0	0	0
Q9UM54	0	0	0	0	0	0	0	0	0	0	0	0	0	0	0	0	0	0	0	0	0	0	0	0	0	0	0	0	0	0	0	0	0	0	0	0	0	0	0	0	0	0	0	0	0	0	0	0	0
O95793	0	0	0	0	0	0	0	0	0	0	0	0	0	0	0	0	0	0	0	0	0	0	0	0	0	0	0	0	0	0	0	0	0	0	0	0	0	0	0	0	0	0	0	0	0	0	0	0	0
Q9NTI5	0	0	0	0	0	0	0	0	0	0	0	0	0	0	0	0	0	0	0	0	0	0	0	0	0	0	0	0	0	0	0	0	0	0	0	0	0	0	0	0	0	0	0	0	0	0	0	0	0
P53041	0	0	0	0	0	0	0	0	0	0	0	0	0	0	0	0	-0.80257	-0.80547	0	0	0	0	0	0	0	0	0	0	0	0	0	0	0	0	0	0	0	0	0	0	0	0	0	0	0	0	0	0	0
Q08752	0	0	0	0	0	0	0	0	0	0	0	0	0	0	0	0	0	0	0	0	0	0	0	0	0	0	0	0	0	0	0	0	0	0	0	0	0	0	0	0	0	0	0	0	0	0	0	0	0
Q12769	0	0	0	0	0	0	0	0	0	0	0	0	0	0	0	0	0	0	0	0	0	0	0	0	0	0	0	0	0	0	0	0	0	0	0	0	0	0	0	0	0	0	0	0	0	0	0	0	0
Q9Y5K5	0	0	0	0	0	0	0	0	0	0	0	0	0	0	0	0	0	0	0	0	0	0	0	0	0	0	0	0	0	0	0	0	0	0	0	0	0	0	0	0	0	0	0	0	0	0	0	0	0
Q9HD42	0	0	0	0	0	0	0	0	0	0	0	0	0	0	0	0	0	0	0	0	0	0	0	0	0	0	0	0	0	0	0	0	0	0	0	0	0	0	0	0	0	0	0	0	0	0	0	0	0
P0DMN0	0	0	0	0	0	0	0	0	0	0	0	0	0	0	0	0	0	0	0	0	0	0	0	0	0	0	0	0	0	0	0	0	0	0	0	0	0	0	0	0	0	0	0	0	0	0	0	0	0
P46734	0	0	0	0	0	0	0	0	0	0	0	0	0	0	0	0	0	0	0	0	0	0	0	0	0	0	0	0	0	0	0	0	0	0	0	0	0	0	0	0	0	0	0	0	0	0	0	0	0
Q9NPQ8	0	0	0	0	0	0	0	0	0	0	0	0	0	0	0	0	0	0	0	0	0	0	0	0	0	0	0	0	0	0	0	0	0	0	0	0	0	0	0	0	0	0	0	0	0	0	0	0	0
Q9NX40	0	0	0	0	0	0	0	0	0	0	0	0	0	0	0	0	0	0	0	0	0	0	0	0	0	0	0	0	0	0	0	0	0	0	0	0	0	0	0	0	0	0	0	0	0	0	0	0	0
Q14126	0	0	0	0	0	0	0	0	0	0	0	0	0	0	0	0	0	0	0	0	0	0	0	0	0	0	0	0	0	0	0	0	0	0	0	0	0	0	0	0	0	0	0	0	0	0	0	0	0
O75477	0	0	0	0	0	0	0	0	0	0	0	-0.8194	-0.84113	-0.84077	0	0	0	0	0	0	0	0	0	0	0	0	0	0	0	0	0	0	0	0	0	0	0	0	0	0	0	0	0	0	0	0	0	0	0
Q13595	-0.87097	0	-0.83983	0	0	0	-0.82491	-0.8362	0	-0.84668	-0.81153	-0.85662	-0.8229	-0.84116	-0.87414	-0.80083	0	0	0	0	0	0	0	-0.83792	0	0	0	0	0	-0.84419	0	0	0	-0.82499	0	0	0	0	0	0	0	0	0	0	0	0	0	0	0
Q14244	0	0	0	0	0	0	0	0	0	0	0	0	0	0	0	0	0	0	0	0	0	0	0	0	0	0	0	0	0	0	0	0	0	0	0	0	0	0	0	0	0	0	0	0	0	0	0	0	0
Q9UK41	0	0	0	0	0	0	0	0	0	0	0	0	0	0	0	0	0	0	0	0	0	0	0	0	0	0	0	0	0	0	0	0	0	0	0	0	0	0	0	0	0	0	0	0	0	0	0	0	0
Q96JB2	0	0	0	0	0	0	0	0	0	0	0	0	0	0	0	0	0	0	0	0	0	0	0	0	0	0	0	0	0	0	0	0	0	0	0	0	0	0	0	0	0	0	0	0	0	0	0	0	0
Q9BXW7	0	0	0	0	0	0	0	0	0	0	0	0	0	0	0	0	0	0	0	0	0	0	0	0	0	0	0	0	0	0	0	0	0	0	0	0	0	0	0	0	0	0	0	0	0	0	0	0	0
Q96DE0	-0.86841	0	0	-0.81961	0	0	0	0	0	0	0	0	0	0	0	0	0	0	0	0	0	0	0	0	0	0	0	-0.82251	0	0	0	-0.83412	0	0	0	0	0	0	0	0	0	-0.85595	0	0	0	0	0	0	0
Q9Y262	0	0	0	0	0	0	0	0	0	0	0	0	0	0	0	0	0	0	0	0	0	0	0	0	0	0	0	0	0	0	0	0	0	0	0	0	0	0	0	0	0	0	0	0	0	0	0	0	0
Q9Y3L3	0	0	0	0	0	0	0	0	0	0	0	0	0	0	0	0	0	0	-0.80751	0	0	0	0	0	0	0	0	-0.85073	0	0	0	0	-0.81861	0	0	0	0	0	0	0	0	0	0	0	0	0	0	0	0
Q6P1N9	0	0	0	0	0	0	0	0	0	0	0	0	0	0	0	0	0	0	0	0	0	0	0	0	0	0	0	0	0	0	0	0	0	0	0	0	0	0	0	0	0	0	0	0	0	0	0	0	0
Q9Y2S7	0	0	0	0	0	0	0	0	0	0	0	0	0	0	0	0	0	0	0	0	0	0	0	0	-0.8519	0	0	-0.80706	0	0	0	0	0	0	0	0	0	0	0	0	0	0	0	0	0	0	0	0	0
Q10713	0	0	0	0	0	0	0	0	0	0	0	0	0	0	0	0	0	0	0	0	0	0	0	0	0	0	0	-0.80185	0	0	0	0	0	0	0	0	0	0	0	0	0	0	0	0	0	0	0	0	0
Q7Z406	0	0	0	0	0	0	0	0	0	0	0	0	0	0	0	0	0	0	0	0	0	0	0	0	0	0	0	-0.82034	0	0	0	0	0	0	0	0	0	0	0	0	0	0	0	0	0	0	0	0	0
Q9P2R7	0	0	0	0	0	0	0	0	0	0	0	0	0	0	0	0	0	0	-0.80081	0	0	0	0	0	0	0	0	0	0	0	0	0	0	0	0	0	0	0	0	0	0	0	0	0	0	0	0	0	0
Q16740	0	0	0	0	0	0	0	0	0	0	0	0	0	0	0	0	0	0	0	0	0	0	0	0	0	0	0	0	0	0	0	0	0	0	0	0	0	0	0	0	0	0	0	0	0	0	0	0	0
O95299	0	0	0	0	0	0	0	0	0	0	0	0	0	0	0	0	0	0	0	0	0	0	0	0	0	0	0	-0.88624	0	0	0	0	0	0	0	0	0	0	0	0	0	0	0	0	0	0	0	0	0
O75116	0	0	0	0	0	0	0	0	0	0	0	0	0	0	0	0	0	0	0	0	0	0	0	0	0	0	0	-0.87461	0	0	0	0	0	0	0	0	0	0	0	0	0	0	0	0	0	0	0	0	0
P05026	0	0	0	0	0	0	0	0	0	0	0	0	0	0	0	0	0	0	0	0	0	0	0	0	0	0	0	-0.88522	0	0	0	0	0	0	0	0	0	0	0	0	0	0	0	0	0	0	0	0	0
P07741	0	-0.81169	0	-0.81129	0	0	0	0	0	0	0	0	0	0	0	0	0	0	0	0	0	0	0	0	0	0	0	0	0	0	0	0	0	0	0	0	0	0	0	0	0	-0.85019	-0.84732	0	-0.80011	0	0	0	0
P35270	-0.8436	-0.86128	-0.8221	-0.84851	0	0	-0.80277	0	0	0	0	0	0	0	0	0	0	0	0	0	0	0	0	-0.80859	-0.80602	0	0	0	0	0	0	0	0	0	0	0	0	0	0	0	0	-0.92445	-0.85765	-0.81527	-0.83305	0	-0.82131	0	0
P08574	-0.88364	-0.86418	-0.84918	-0.91385	-0.87607	-0.80025	-0.86422	-0.84549	-0.87063	-0.82236	-0.8277	-0.85	0	0	-0.8016	0	0	0	-0.8735	-0.80128	-0.81095	0	0	-0.9085	-0.90625	-0.86273	0	0	0	0	0	0	0	0	0	0	0	0	0	0	0	-0.83774	0	0	0	0	0	0	0
P48637	-0.85467	-0.90275	-0.88828	-0.89429	-0.85495	-0.85987	-0.82967	-0.80224	-0.83803	0	-0.80941	0	0	0	0	0	0	0	-0.81325	0	0	0	0	-0.85617	-0.83092	-0.82436	0	0	0	0	0	0	0	-0.8212	0	0	0	0	0	0	0	-0.85883	-0.81754	0	0	0	0	0	0
Q96QR8	0	0	0	0	0	0	-0.82192	-0.81588	0	0	0	0	0	0	0	0	0	0	-0.80253	0	0	0	0	0	0	0	0	0	0	0	0	0	0	0	0	0	0	0	0	0	0	0	0	0	0	0	0	0	0
O14964	0	0	0	-0.84132	-0.80517	0	0	0	0	0	0	0	0	0	0	0	0	0	0	0	0	0	0	-0.81468	0	0	0	0	0	0	0	0	0	0	0	0	0	0	0	0	0	0	0	0	0	0	0	0	0
Q14839	-0.83707	0	0	-0.81682	0	0	-0.83791	-0.83912	-0.83051	0	0	0	0	0	-0.81905	0	0	0	-0.8328	0	0	0	0	-0.81122	0	0	0	0	0	0	0	0	0	0	0	0	0	0	0	0	0	0	0	0	0	0	0	0	0
Q92621	0	0	0	-0.84047	-0.83138	-0.80233	-0.81213	-0.81206	-0.81339	0	0	0	0	0	-0.83043	0	0	0	0	0	0	0	0	-0.83632	0	0	0	0	0	0	0	0	0	0	0	0	0	0	0	0	0	0	0	0	0	0	0	0	0
P57735	-0.80475	-0.83287	-0.83627	-0.81484	-0.83809	0	0	0	0	0	0	0	0	0	-0.82439	0	0	0	0	0	0	0	-0.81303	-0.83626	-0.82194	0	0	0	0	0	0	0	0	0	0	0	0	0	0	0	0	0	0	0	0	0	0	0	0
Q96IU4	0	-0.83759	0	-0.82944	0	-0.84642	0	0	0	0	0	0	0	0	0	0	0	0	0	0	0	0	0	0	0	0	0	0	0	0	0	0	0	0	0	0	0	0	0	0	0	-0.81144	0	0	0	0	0	0	0
P16219	0	0	0	-0.89216	0	-0.83196	-0.81021	0	-0.80645	0	-0.83663	-0.82751	-0.80245	0	0	0	0	0	0	0	0	0	0	-0.82961	0	-0.83009	0	0	-0.85355	0	0	0	0	0	0	0	0	0	0	0	0	0	0	0	0	0	0	0	0
Q53EL6	0	-0.82748	-0.82405	-0.91019	-0.80027	-0.84187	0	0	0	0	-0.82108	-0.81937	0	0	0	0	0	0	0	0	0	0	0	-0.84584	0	-0.81871	-0.85039	0	-0.82237	-0.81551	0	0	0	0	0	0	0	0	0	0	0	0	0	0	0	0	0	0	0
O95563	0	-0.83451	0	-0.91437	-0.83026	-0.87837	0	0	0	0	0	0	0	0	0	0	0	0	0	0	0	0	0	0	0	-0.87018	-0.85117	0	-0.83617	0	0	0	0	0	0	0	0	0	0	0	0	0	0	0	0	0	0	0	0
P30044	0	-0.92078	-0.83983	-0.88487	0	-0.86967	0	0	0	0	0	0	-0.84729	0	0	0	0	0	0	0	0	0	0	0	0	-0.87238	0	0	0	0	0	0	0	0	0	0	0	0	0	0	0	-0.82278	-0.89852	0	-0.83262	0	0	0	0
Q02338	0	-0.89407	-0.80604	-0.89938	-0.86274	0	0	0	0	0	0	-0.82223	0	0	0	0	0	0	0	-0.80362	0	0	0	-0.8242	-0.83594	-0.88446	0	0	0	0	-0.82416	0	0	0	0	0	0	0	0	0	0	-0.81905	-0.80133	0	0	0	0	0	0
P36542	0	-0.83514	0	-0.86354	-0.8901	-0.80499	-0.83379	-0.82378	-0.82961	-0.80709	-0.80277	-0.81344	0	0	-0.806	0	0	0	0	0	0	0	0	-0.80831	-0.81178	-0.82599	0	0	0	0	0	0	0	0	0	0	0	0	0	0	0	0	0	0	0	0	0	0	0
P49756	0	-0.80123	0	0	-0.87794	0	-0.80524	0	0	0	0	0	0	0	0	0	0	0	0	0	0	0	0	0	0	0	0	0	0	0	0	0	0	0	0	0	0	0	0	0	0	0	0	0	0	0	0	0	0
P45973	0	-0.81208	0	-0.84167	-0.93207	0	-0.86898	-0.86756	-0.90605	-0.84339	-0.87133	-0.867	0	-0.81278	-0.81514	0	0	0	0	-0.8302	0	-0.83954	0	-0.81249	-0.80502	0	0	0	0	0	0	0	0	0	0	0	0	0	0	0	0	0	0	0	0	0	0	0	0
P13073	0	-0.83524	0	-0.87638	-0.91865	-0.81484	-0.81303	-0.80838	-0.81696	-0.81676	-0.81974	-0.85691	-0.81838	-0.81096	0	0	0	0	-0.80722	-0.85418	-0.82135	0	-0.81366	-0.81209	-0.8512	-0.88149	0	0	0	0	0	0	0	0	0	0	0	0	0	0	0	0	0	0	0	0	0	0	0
Q9NSK0	-0.83233	-0.84438	0	-0.86496	-0.91416	0	-0.86428	-0.8588	-0.85264	-0.85407	-0.85543	-0.89332	-0.84338	-0.83267	-0.81247	0	0	0	-0.86576	-0.87083	-0.86778	-0.8459	-0.88045	-0.87892	-0.93632	-0.84138	0	0	0	0	0	0	-0.84639	0	0	-0.81991	-0.81616	-0.82571	-0.85775	0	0	0	0	0	0	0	0	0	0
P54105	0	0	0	0	0	0	0	0	0	0	0	0	0	0	0	0	0	0	0	0	0	0	0	0	0	0	0	0	0	0	0	0	0	0	0	0	0	0	0	0	0	0	0	0	0	0	0	0	0
P04080	0	0	0	0	0	0	0	0	0	0	0	0	0	0	0	0	0	0	0	0	0	0	0	0	0	0	0	0	0	0	0	0	0	0	0	0	0	0	0	0	0	0	0	0	0	0	0	0	0
P12268	0	0	0	0	0	-0.86598	0	0	0	0	0	0	0	0	0	0	0	0	0	0	0	0	0	0	0	0	0	0	0	0	0	0	0	0	0	0	0	0	0	0	0	0	0	0	0	0	0	0	0
Q9Y333	0	0	0	0	0	0	0	0	0	0	0	0	0	0	0	0	0	0	0	0	0	0	0	0	0	0	0	0	0	0	0	0	0	0	0	0	0	0	0	0	0	0	0	0	0	0	0	0	0
O76003	0	0	0	0	0	0	0	0	0	0	0	0	0	0	0	0	0	0	0	0	0	0	0	0	0	0	0	0	0	0	0	0	0	0	0	0	0	0	0	0	0	0	0	0	0	0	0	0	0
Q6P1M3	-0.80365	0	0	0	0	0	0	0	0	0	0	0	0	0	0	0	0	0	0	0	0	0	0	0	0	0	0	0	0	0	0	0	0	0	0	0	0	0	0	0	0	0	0	-0.81545	0	0	0	0	0
O95218	0	0	0	0	0	0	0	-0.80898	0	0	0	0	0	0	0	0	0	0	0	0	0	0	0	0	0	0	0	0	0	0	0	0	0	0	0	0	0	0	0	0	0	0	0	0	0	0	0	0	0
P07814	-0.80037	0	0	0	0	0	-0.82308	-0.84892	0	0	0	0	0	0	-0.80645	-0.81013	0	0	0	0	0	0	0	0	0	0	0	0	0	0	0	0	0	0	0	0	0	0	0	0	0	0	0	0	0	0	0	0	0
P36551	-0.90995	-0.81032	-0.85704	-0.82755	0	0	-0.82823	-0.82414	0	-0.80576	0	-0.83727	0	0	-0.81799	-0.80677	0	0	0	0	0	0	0	-0.84647	0	0	0	0	0	-0.92449	0	-0.84001	0	0	0	0	0	0	0	0	0	-0.82267	-0.84215	0	0	0	0	0	0
A0AV96	-0.80946	0	0	0	0	0	-0.81422	0	0	0	0	0	0	0	0	-0.83198	0	0	0	0	0	0	0	0	0	0	0	0	0	0	0	0	0	0	0	0	0	0	0	0	0	0	0	0	0	0	0	0	0
Q9BYD3	-0.83402	0	0	-0.81874	0	0	-0.80503	0	0	0	0	0	0	0	0	0	0	0	-0.84467	0	0	0	0	0	0	-0.81956	0	0	0	0	0	0	0	0	0	0	0	0	0	0	0	0	-0.827	0	0	0	0	0	0
Q13232	0	0	0	0	0	0	0	0	0	0	0	0	0	0	0	0	0	0	0	0	0	0	0	0	0	0	0	0	0	0	0	0	0	0	0	0	0	0	0	0	0	0	0	0	0	0	0	0	0
Q8WVY7	0	0	0	0	0	0	0	0	0	0	0	0	0	0	0	0	0	0	0	0	0	0	0	0	0	0	0	0	0	0	0	0	0	0	0	0	0	0	0	0	0	0	0	0	0	0	0	0	0
O15067	0	0	0	-0.85142	0	0	0	0	0	0	0	0	0	0	0	0	0	0	0	0	0	0	0	0	0	0	-0.86997	-0.83965	0	0	0	0	0	0	0	0	0	0	0	0	0	0	0	0	0	0	0	0	0
Q9H0W9	0	-0.8439	0	-0.85957	0	0	0	0	0	0	0	0	0	0	0	0	0	0	0	0	0	0	0	0	0	0	-0.81307	0	0	0	0	0	0	0	0	0	0	0	0	0	0	0	0	0	0	0	0	0	0
Q16718	0	0	0	0	0	0	0	0	0	0	0	0	0	0	0	0	0	0	0	0	0	0	0	0	0	0	0	0	0	0	0	0	0	0	0	0	0	0	0	0	0	0	0	0	0	0	0	0	0
O94905	0	0	0	0	0	0	0	0	0	0	0	0	0	0	0	0	0	0	0	0	0	0	0	0	0	0	0	0	0	0	0	0	0	0	0	0	0	0	0	0	0	0	0	0	0	0	0	0	0
Q14683	0	0	0	0	0	0	0	0	0	0	0	0	0	0	0	0	0	0	0	0	0	0	0	0	0	0	0	0	0	0	0	0	0	0	0	0	0	0	0	0	0	0	0	0	0	0	0	0	0
P33240	0	0	0	0	0	-0.87282	0	0	0	0	0	0	0	0	0	0	0	0	0	0	0	0	0	0	0	0	0	0	0	0	0	0	0	0	0	0	0	0	0	0	0	0	0	0	0	0	0	0	0
P57737	0	0	0	0	-0.804	-0.83985	0	0	0	0	0	0	0	0	0	0	0	0	0	0	0	0	0	0	0	0	0	0	0	0	0	0	0	0	0	0	0	0	0	0	0	0	0	0	0	0	0	0	0
P25789	0	0	-0.82597	0	0	-0.81626	0	0	0	0	0	0	0	0	-0.85487	0	0	0	0	0	0	0	0	0	0	0	0	0	0	0	0	0	0	0	0	0	0	0	0	0	0	0	0	0	0	0	0	0	0
Q6PIU2	0	0	-0.84697	0	0	-0.8966	-0.82632	-0.82327	0	-0.835	-0.82396	0	-0.81347	0	-0.82745	0	0	0	0	0	0	0	0	0	0	0	0	0	0	0	0	0	0	0	0	0	0	0	0	0	0	0	0	0	0	0	0	0	0
Q15165	0	0	0	0	0	-0.90729	0	0	0	0	0	0	0	0	0	0	0	0	0	0	0	0	0	0	0	0	0	0	0	0	0	0	0	0	0	0	0	0	0	0	0	0	0	0	0	0	0	0	0
Q9BX68	0	0	-0.80483	0	0	-0.90727	0	0	0	0	0	0	0	0	0	0	0	0	0	0	0	0	0	0	0	0	0	0	0	0	0	0	0	0	0	0	0	0	0	0	0	0	0	0	0	0	0	0	0
P12270	0	0	0	0	-0.80484	-0.83024	0	0	0	0	0	0	0	0	0	0	0	0	0	0	0	0	0	0	0	0	0	0	0	0	0	0	0	0	0	0	0	0	0	0	0	0	0	0	0	0	0	0	0
P18754	0	0	0	0	0	-0.84293	0	0	0	0	0	0	0	0	0	0	0	0	0	0	0	0	0	0	0	0	0	0	0	0	0	0	0	0	0	0	0	0	0	0	0	0	0	0	0	0	0	0	0
Q02790	0	0	0	0	0	-0.84009	0	0	0	0	0	0	0	0	0	0	0	0	0	0	0	0	0	0	0	0	0	0	0	0	0	0	0	0	0	0	0	0	0	0	0	0	0	0	0	0	0	0	0
Q15008	-0.81207	-0.83766	-0.87366	-0.84251	0	-0.87579	0	0	-0.81779	0	0	0	0	0	0	0	0	0	0	0	0	0	0	-0.80345	0	0	0	0	0	0	0	0	0	0	0	0	0	0	0	0	0	0	0	0	0	-0.81286	0	0	0
Q6P2Q9	0	0	0	0	0	-0.86829	-0.81017	0	-0.82123	0	0	0	0	0	0	0	0	0	0	0	0	0	0	0	0	0	0	0	0	0	0	0	0	0	0	0	0	0	0	0	0	0	0	0	0	0	0	0	0
O00515	-0.80543	-0.80809	0	-0.86783	0	-0.86252	0	0	-0.84277	0	-0.80643	0	0	0	0	0	0	0	0	0	0	0	0	0	0	0	0	0	0	0	0	0	0	0	0	0	0	0	0	0	0	0	0	0	0	0	0	0	0
P51398	0	0	0	-0.87068	0	-0.83587	0	0	-0.82846	0	-0.80834	0	0	0	0	0	0	0	0	0	0	0	0	0	0	0	0	0	0	0	0	0	0	0	0	0	0	0	0	0	0	0	0	0	0	0	0	0	0
Q8NFW8	0	-0.83058	0	-0.84207	-0.83588	-0.80014	0	0	0	0	0	0	0	0	0	0	0	0	0	0	0	0	0	0	0	0	0	0	0	0	-0.80616	0	0	0	0	0	0	0	0	0	0	0	0	0	0	0	0	0	0
Q9UBQ5	0	0	0	-0.84249	0	-0.84377	0	0	-0.81695	0	0	0	0	0	0	0	0	0	0	0	0	0	0	0	0	0	0	0	0	0	0	0	0	0	0	0	0	0	0	0	0	0	0	0	0	0	0	0	0
Q96RQ3	-0.89836	-0.83171	-0.89228	-0.82995	0	0	-0.84909	-0.8231	-0.86793	-0.85702	-0.8498	0	0	-0.81441	0	0	0	0	0	0	-0.81005	0	0	-0.87717	0	0	0	0	0	0	0	0	0	-0.85511	0	0	0	0	0	0	0	0	0	0	0	0	0	0	0
P19075	-0.80757	-0.88108	-0.92926	-0.87338	0	-0.80186	0	0	0	0	0	0	0	0	0	0	0	0	0	0	0	0	0	-0.87812	0	-0.81087	0	0	0	-0.82302	0	0	0	-0.81093	0	0	0	0	0	0	0	-0.86434	-0.87061	0	0	-0.89043	0	0	0
Q9ULC5	-0.85205	0	-0.82215	0	-0.80512	0	0	0	-0.82983	0	0	0	0	0	0	0	0	0	0	0	0	0	0	-0.88465	-0.8105	0	0	0	0	0	0	0	0	0	0	0	0	0	0	0	0	0	0	0	0	0	0	0	0
P30046	0	0	-0.87645	0	0	0	0	0	0	0	0	0	0	0	0	0	0	0	0	0	0	0	0	-0.81383	0	0	0	0	0	0	0	0	0	0	0	0	0	0	0	0	0	-0.85266	-0.81516	0	0	-0.8252	0	0	0
P82933	0	0	0	0	0	0	0	0	0	0	0	0	0	0	0	0	0	0	0	0	0	0	0	0	0	0	0	0	0	0	0	0	0	0	0	0	0	0	0	0	0	0	0	0	0	0	0	0	0
P56192	0	0	-0.84816	0	0	-0.85265	0	0	0	0	0	0	0	0	0	0	0	0	0	0	0	0	0	0	0	0	0	0	0	0	0	0	0	0	0	0	0	0	0	0	0	0	0	0	0	0	0	0	0
Q16822	0	0	0	-0.80596	0	-0.8269	0	0	0	0	0	0	0	0	0	0	0	0	0	0	0	0	0	0	0	0	0	0	0	0	0	0	0	0	0	0	0	0	0	0	0	0	0	0	0	0	0	0	0
Q99714	0	0	0	0	0	-0.81927	0	0	0	0	0	0	0	0	0	0	0	0	0	0	0	0	0	0	0	0	0	0	0	0	0	0	0	0	0	0	0	0	0	0	0	0	0	0	0	0	0	0	0
Q9Y230	0	0	0	0	0	-0.84511	0	0	0	0	0	0	0	0	0	0	0	0	0	0	0	0	0	0	0	0	0	0	0	0	0	0	0	0	0	0	0	0	0	0	0	0	0	0	0	0	0	0	0
P48729	0	0	-0.80566	0	0	-0.87929	0	0	0	0	0	0	0	0	0	0	0	0	0	0	0	0	0	0	0	0	0	0	0	0	0	0	0	0	0	0	0	0	0	0	0	0	0	0	0	0	0	0	0
Q9Y5L4	0	0	-0.8388	0	0	-0.90705	0	0	-0.80332	0	0	0	0	0	0	0	0	0	0	0	0	0	0	0	0	0	0	0	0	0	0	0	0	0	0	0	0	0	0	0	0	0	0	0	0	0	0	0	0
O60547	0	-0.80722	-0.90693	-0.81118	0	-0.88101	0	0	-0.81302	0	-0.82365	0	0	0	0	0	0	0	0	0	0	0	0	-0.81848	0	0	0	0	0	0	0	0	0	-0.82543	0	0	0	0	0	0	0	0	0	0	0	-0.82051	0	0	0
P62857	0	0	0	0	-0.83075	-0.85833	0	0	-0.80239	0	0	0	0	0	0	0	0	0	0	0	0	0	0	0	0	0	0	0	0	0	0	0	0	0	0	0	0	0	0	0	0	0	0	0	0	0	0	0	0
Q9Y3L5	0	0	-0.8355	0	0	-0.81658	0	0	0	0	0	0	0	0	0	0	0	0	0	0	0	0	0	0	0	0	0	0	0	0	0	0	0	0	0	0	0	0	0	0	0	0	0	0	0	0	0	0	0
O95571	0	-0.81126	-0.80595	-0.80324	-0.81008	-0.87309	0	0	0	0	0	0	0	0	0	0	0	0	0	0	0	0	0	0	0	0	0	0	0	0	0	0	0	0	0	0	0	0	0	0	0	0	0	0	0	0	0	0	0
O95232	0	0	0	0	0	-0.83419	0	0	0	0	0	0	0	0	0	0	0	0	0	0	0	0	0	0	0	0	0	0	0	0	0	0	0	0	0	0	0	0	0	0	0	0	0	0	0	0	0	0	0
P49585	0	0	0	0	0	-0.80319	0	0	0	0	0	0	0	0	0	0	0	0	0	0	0	0	0	0	0	0	0	0	0	0	0	0	0	0	0	0	0	0	0	0	0	0	0	0	0	0	0	0	0
P17931	0	0	0	-0.84542	-0.8216	-0.80761	0	0	0	0	0	0	0	0	0	0	0	0	0	0	0	0	0	0	0	-0.81904	0	0	0	0	0	0	0	0	0	0	0	0	0	0	0	0	0	0	0	0	0	0	0
P80365	0	-0.80746	0	-0.80372	0	0	0	0	0	0	0	0	0	0	0	0	0	0	0	0	0	0	0	0	0	-0.83367	0	0	0	0	0	0	0	0	0	0	0	0	0	0	0	0	-0.84139	0	0	0	0	0	0
Q8NFV4	0	-0.82006	0	-0.80546	0	0	0	0	0	0	0	0	0	0	0	0	0	0	0	0	0	0	0	0	0	0	0	0	0	0	0	0	0	0	0	0	0	0	0	0	0	-0.80645	0	0	0	0	0	0	0
Q96I99	0	0	0	-0.84796	-0.90358	0	0	0	-0.80668	0	0	0	0	0	0	0	0	0	0	0	0	0	0	0	-0.80755	-0.81058	0	0	0	0	0	0	0	0	0	0	0	0	0	0	0	0	0	0	0	0	0	0	0
Q99459	0	0	0	0	0	0	0	0	0	0	0	0	0	0	0	0	0	0	0	0	0	0	0	0	0	0	0	0	0	0	0	0	0	0	0	0	0	0	0	0	0	0	0	0	0	0	0	0	0
Q9Y5X3	0	0	0	0	0	0	0	0	0	0	0	0	0	0	0	0	0	0	0	0	0	0	0	0	0	0	0	0	0	0	0	0	0	0	0	0	0	0	0	0	0	0	0	0	0	0	0	0	0
Q9Y2V2	0	0	0	0	0	0	0	0	0	0	0	0	0	0	0	0	0	0	0	0	0	0	0	0	0	0	0	0	0	0	0	0	0	0	0	0	0	0	0	0	0	0	0	0	0	0	0	0	0
Q9UBB4	0	0	0	0	0	0	0	0	0	0	0	0	0	0	0	0	0	0	0	0	0	0	0	0	0	0	0	0	0	0	0	0	0	0	0	0	0	0	0	0	0	0	0	0	0	0	0	0	0
P46379	0	0	0	0	0	0	0	0	0	0	0	0	0	0	0	0	0	0	0	0	0	0	0	0	0	0	0	0	0	0	0	0	0	0	0	0	0	0	0	0	0	0	0	0	0	0	0	0	0
Q13155	0	0	0	0	0	0	0	0	-0.80261	0	0	0	0	0	0	0	0	0	0	0	0	0	0	0	0	0	0	0	0	0	0	0	0	0	0	0	0	0	0	0	0	0	0	0	0	0	0	0	0
P31937	0	0	0	0	0	0	0	0	0	0	0	0	0	0	0	0	0	0	0	0	0	0	0	0	0	0	0	0	0	0	0	0	0	0	0	0	0	0	0	0	0	0	0	0	0	0	0	0	0
Q9HB07	0	0	0	0	0	0	0	0	0	0	0	0	0	0	0	0	0	0	0	0	0	0	0	0	0	0	0	0	0	0	0	0	0	0	0	0	0	0	0	0	0	-0.81539	0	0	0	0	0	0	0
Q9BQ61	-0.82682	0	0	0	0	0	-0.80007	0	0	0	0	0	0	0	0	0	0	0	-0.90754	0	0	0	0	0	0	0	0	0	0	0	0	0	0	0	0	0	0	0	-0.84021	0	0	0	0	0	0	0	0	0	0
Q9Y237	-0.86535	0	-0.81337	0	0	0	0	0	0	0	0	0	0	0	0	0	0	0	0	0	0	0	0	0	0	0	0	0	0	0	0	0	0	0	0	0	0	0	0	0	0	-0.813	0	-0.8249	0	0	0	0	0
Q9Y2Z0	-0.87527	0	0	0	0	0	0	0	0	0	0	0	0	0	-0.82999	0	0	0	-0.84164	0	0	0	0	-0.80692	0	0	0	0	0	0	0	0	0	0	0	0	0	0	0	0	0	0	0	0	0	0	0	0	0
P07919	-0.86615	0	0	-0.86266	-0.80507	0	-0.86095	-0.84049	-0.89344	-0.82986	-0.84081	-0.85631	0	0	0	-0.80824	0	0	-0.85857	0	-0.82423	0	0	-0.85943	0	-0.81763	0	0	0	-0.8642	0	-0.83072	0	0	0	0	0	0	0	0	0	0	0	0	0	0	0	0	0
O15347	-0.92131	-0.81748	-0.86705	-0.81701	0	0	-0.81794	-0.81965	-0.81677	-0.81308	-0.80914	0	0	0	-0.887	0	0	0	-0.84228	0	-0.80178	0	0	-0.84814	0	0	0	0	0	-0.82206	0	0	0	-0.81762	0	0	0	0	0	-0.82225	0	0	0	0	0	-0.80752	0	0	0
P30038	-0.90292	-0.80123	-0.81988	-0.80776	-0.83968	0	-0.86155	-0.85325	-0.88907	-0.84394	-0.84055	-0.81554	0	0	-0.83775	-0.80156	0	-0.81918	-0.8725	0	-0.84153	0	-0.80262	-0.85052	-0.80251	0	0	0	0	0	0	0	0	0	0	0	0	0	-0.80136	-0.81111	0	0	0	0	0	0	0	0	0
O60716	0	-0.8314	-0.8614	-0.84818	-0.87302	-0.8843	-0.80086	0	-0.85401	0	-0.81928	0	0	0	0	0	0	0	0	0	0	0	0	-0.8443	0	0	0	0	0	0	0	0	0	0	0	0	0	0	0	0	0	0	0	0	0	0	0	0	0
P00367	0	-0.82111	-0.85405	-0.8216	-0.89353	-0.82724	-0.84549	-0.82996	-0.86986	-0.8488	-0.83684	-0.80956	0	0	-0.82063	0	0	0	0	0	-0.81636	0	0	-0.84623	0	0	0	0	0	0	0	0	0	-0.8033	0	0	0	0	0	0	0	0	0	0	0	0	0	0	0
P40306	0	0	0	0	-0.92808	0	-0.84087	-0.83041	-0.89524	-0.83985	-0.85981	-0.81146	0	-0.80047	0	0	0	0	0	0	-0.84687	0	-0.81035	0	0	0	0	0	0	0	-0.80264	0	0	0	0	0	0	0	0	0	0	0	0	0	0	0	0	0	0
Q99417	-0.83636	-0.84461	-0.8586	-0.83109	0	-0.83504	-0.8075	0	-0.83118	0	-0.81098	0	0	0	0	0	0	0	0	0	0	0	0	0	0	0	0	0	0	-0.81652	-0.85254	0	0	0	0	0	0	0	0	0	0	0	0	0	0	0	0	0	0
P14927	-0.82474	-0.89343	0	-0.83342	0	0	-0.81916	-0.81105	0	-0.81838	-0.80811	-0.82505	-0.88071	-0.83915	-0.80852	0	0	0	0	-0.80908	0	0	-0.82132	-0.80426	-0.85666	-0.82612	0	0	0	0	0	0	0	-0.84472	0	-0.87468	0	0	0	-0.82132	0	0	0	0	0	0	0	0	0
Q8NBX0	0	0	0	0	0	0	-0.84617	-0.87629	0	-0.85178	-0.80253	-0.86678	-0.82023	-0.85987	-0.82801	-0.81243	-0.82727	0	-0.80278	-0.87076	-0.84387	-0.86818	-0.8405	0	0	0	0	0	0	0	0	0	-0.88361	0	0	-0.80798	0	0	-0.83853	0	0	0	0	0	0	0	0	0	0
P30049	-0.81387	0	0	-0.82996	-0.85895	0	-0.90125	-0.92585	-0.88047	-0.93154	-0.89835	-0.95077	-0.87164	-0.92526	-0.87937	-0.85186	-0.85323	0	-0.8097	-0.86851	-0.91557	-0.90124	-0.89369	-0.8672	-0.81899	0	0	0	-0.81711	0	0	-0.81591	-0.85121	0	-0.83547	-0.82898	0	0	-0.8268	0	0	0	0	0	0	0	0	0	0
Q16698	0	0	0	-0.80941	-0.8827	0	-0.9018	-0.9106	-0.87842	-0.90205	-0.87314	-0.94411	-0.89277	-0.90276	0	-0.83745	-0.85403	0	-0.80541	-0.85783	-0.87309	-0.84495	-0.85047	-0.82768	-0.84489	0	0	0	0	0	0	-0.80013	-0.83554	0	0	-0.80127	0	0	-0.82739	0	0	0	0	0	0	0	0	0	0
P30626	0	-0.82991	0	-0.90619	0	0	0	0	0	0	0	-0.80585	0	0	0	0	0	0	0	0	0	0	0	-0.81097	0	-0.89504	-0.82605	-0.80289	-0.85467	0	0	0	0	0	0	0	0	0	0	0	0	0	-0.81402	0	0	0	0	0	0
O75351	0	0	0	-0.81001	0	0	0	0	0	0	0	0	0	0	0	0	0	0	0	0	0	0	0	0	0	-0.80052	0	-0.86435	0	0	0	0	0	0	0	0	0	0	0	0	0	0	0	0	0	0	0	0	0
O94760	0	0	0	-0.81751	0	0	0	0	0	0	0	0	0	0	0	0	0	0	0	0	0	0	0	0	0	0	0	-0.80471	0	0	0	0	0	0	0	0	0	0	0	0	0	0	0	0	0	0	0	0	0
P05091	-0.84287	0	0	-0.83262	0	0	-0.80168	-0.81088	0	0	0	-0.80907	0	0	0	0	0	-0.87454	-0.91267	-0.84164	0	0	0	0	-0.85964	-0.81033	0	-0.88773	0	0	0	-0.88103	-0.86403	0	0	0	0	0	0	0	0	0	0	0	0	0	0	0	0
Q9H2U2	0	0	0	0	0	0	0	0	0	0	0	-0.81025	0	0	0	0	0	0	0	0	0	0	0	0	0	0	0	0	0	0	0	0	0	0	0	0	0	0	0	0	0	0	0	0	0	0	0	0	0
Q9NUB1	0	0	0	0	0	0	0	0	0	0	0	0	0	0	0	0	0	0	-0.81911	0	0	0	0	0	0	0	0	-0.8226	0	0	0	0	0	0	0	0	0	0	0	0	0	0	0	0	0	0	0	0	0
O15372	0	0	0	0	0	0	0	0	0	0	0	0	0	0	0	0	0	0	0	0	0	0	0	0	0	0	0	-0.88085	0	0	0	0	0	0	0	0	0	0	0	0	0	0	0	0	0	0	0	0	0
Q01082	0	0	0	-0.87586	-0.81086	0	-0.81953	-0.82988	-0.80513	0	0	-0.86461	0	0	0	0	0	0	0	-0.81586	0	0	0	-0.82368	-0.81913	-0.81912	0	-0.88958	0	0	0	0	0	0	0	0	0	0	0	0	0	0	0	0	0	0	0	0	0
Q9NR28	0	0	0	0	0	0	0	0	0	0	0	0	0	0	0	0	0	0	0	0	0	0	0	0	0	0	0	0	0	-0.83956	0	0	0	0	0	0	0	0	0	0	0	0	0	0	0	0	0	0	0
O43242	0	0	0	0	0	0	0	0	0	0	0	0	0	0	0	-0.82967	-0.82247	-0.80844	0	0	0	0	0	0	0	0	0	0	0	0	0	0	0	0	0	0	0	0	0	0	0	0	0	0	0	0	0	0	0
P39748	0	0	0	0	0	0	0	0	0	0	0	0	0	0	0	0	0	0	0	0	0	0	0	0	0	0	0	0	0	0	0	0	0	0	0	0	0	0	0	0	0	0	0	0	0	0	0	0	0
Q02880	0	0	0	0	0	0	0	0	0	0	0	0	0	0	0	0	0	0	0	0	0	0	0	0	0	0	0	0	0	0	0	0	0	0	0	0	0	0	0	0	0	0	0	0	0	0	0	0	0
Q9HC35	0	0	0	0	0	0	0	0	0	0	0	0	0	0	0	0	0	0	0	0	0	0	0	0	0	0	0	0	0	-0.86616	0	0	0	0	0	0	0	0	0	0	0	0	0	0	0	0	0	0	0
P05067	0	0	0	0	0	0	0	0	0	0	0	0	0	0	0	0	0	0	0	0	0	0	0	0	0	0	-0.80615	0	0	-0.88039	0	0	0	0	0	0	0	0	0	0	0	0	0	0	0	0	0	0	0
Q9NR19	0	0	0	0	0	0	0	0	0	0	0	0	0	0	0	0	0	0	0	0	0	0	0	0	0	0	0	0	0	0	0	0	0	0	0	0	0	0	0	0	0	0	0	0	0	0	0	0	0
P26639	-0.81968	0	0	0	0	0	-0.82418	-0.83242	0	0	0	0	0	0	0	-0.82896	-0.80685	-0.84014	0	0	0	0	0	0	0	0	0	0	0	0	0	0	0	0	0	0	0	0	0	0	0	0	0	0	0	0	0	0	0
Q01130	0	0	0	0	0	0	0	0	0	0	0	0	0	0	0	0	0	0	0	0	0	0	0	0	0	0	0	0	0	0	0	0	0	0	0	0	0	0	0	0	0	0	0	0	0	0	0	0	0
Q14247	0	0	0	0	0	0	-0.84129	-0.85732	0	-0.81044	0	0	0	0	-0.89198	-0.8568	-0.84611	0	0	0	0	0	0	0	0	0	0	0	0	0	0	0	0	0	0	0	0	0	0	0	0	0	0	0	0	0	0	0	0
Q63HN8	-0.82606	0	0	0	0	0	-0.8454	-0.8647	0	-0.83744	0	0	0	0	-0.91246	-0.88659	-0.84051	0	0	0	0	0	0	0	0	0	0	0	0	0	0	0	0	0	0	0	0	0	0	0	0	0	0	0	0	0	0	0	0
P55010	0	0	0	0	0	-0.80231	-0.80528	-0.8183	0	0	0	0	0	0	-0.85711	0	0	0	0	0	0	0	0	0	0	0	0	0	0	0	0	0	0	0	0	0	0	0	0	0	0	0	0	0	0	0	0	0	0
P55209	0	0	0	0	0	-0.82756	-0.82693	-0.82647	0	0	0	0	0	0	0	-0.82682	-0.80554	-0.82709	0	0	0	0	0	0	0	0	0	0	0	0	0	0	0	0	0	0	0	0	0	0	0	0	0	0	0	0	0	0	0
Q8N2K0	0	0	0	0	0	0	0	-0.81163	0	0	0	0	0	0	0	-0.81798	0	0	0	0	0	0	0	0	0	0	0	0	0	0	0	0	0	0	0	0	0	0	0	0	0	0	0	0	0	0	0	0	0
O60701	0	-0.80005	0	-0.85667	0	-0.89236	0	0	0	0	0	0	0	0	0	0	0	0	0	0	0	0	0	0	0	0	-0.90604	0	0	0	0	0	0	0	0	0	0	0	0	0	0	0	0	0	0	0	0	0	0
Q9NR45	0	-0.87179	-0.84474	-0.89979	0	-0.84014	-0.80966	0	0	0	-0.82648	0	0	0	0	0	0	0	0	0	0	0	0	-0.80643	0	-0.82848	-0.88085	0	0	0	0	0	0	0	0	0	0	0	0	0	0	0	-0.80574	0	0	0	0	0	0
Q06323	0	-0.80811	0	0	0	-0.85503	-0.81701	-0.81085	0	0	0	0	0	0	-0.84618	0	0	0	0	0	0	0	0	0	0	0	0	0	0	0	0	0	0	0	0	0	0	0	0	0	0	0	0	0	0	0	0	0	0
P00558	0	-0.81436	0	0	0	-0.84191	0	0	0	0	0	0	0	0	0	0	0	0	0	0	0	0	0	0	0	0	0	0	0	0	0	0	0	0	0	0	0	0	0	0	0	0	0	0	0	0	0	0	0
P27695	0	-0.81343	-0.81399	-0.82421	0	-0.90449	-0.84377	-0.8342	0	-0.80202	0	0	0	0	-0.82344	-0.8065	0	0	0	0	0	0	0	0	0	0	-0.81039	0	0	0	0	0	0	0	0	0	0	0	0	0	0	0	0	0	0	0	0	0	0
Q00688	-0.80765	-0.86213	-0.81542	-0.81685	0	-0.81097	-0.84763	-0.82239	0	0	0	0	0	0	-0.80047	-0.80129	0	0	0	0	0	0	0	0	0	0	0	0	0	0	0	0	0	0	0	0	0	0	0	0	0	0	0	-0.81315	-0.8216	0	0	0	0
Q9UL46	0	0	0	0	0	-0.84668	-0.81908	-0.82051	0	0	0	0	0	0	-0.84204	0	0	0	0	0	0	0	0	0	0	0	-0.81912	0	0	0	0	0	0	0	0	0	0	0	0	0	0	0	0	0	0	0	0	0	0
P15880	0	0	0	0	0	-0.8993	-0.8699	-0.85537	-0.82629	-0.80289	0	0	0	0	0	-0.83248	0	0	0	0	0	0	0	0	0	0	0	0	0	0	0	0	0	0	0	0	0	0	0	0	0	0	0	0	0	0	0	0	0
P20042	0	0	0	0	0	-0.86003	-0.89198	-0.88833	-0.8329	-0.85874	-0.8172	0	-0.81405	-0.8058	-0.82503	-0.85853	-0.83972	0	0	0	0	0	0	0	0	0	0	0	0	0	0	0	0	0	0	0	0	0	0	0	0	0	0	0	0	0	0	0	0
P09429	0	-0.82549	0	-0.80503	-0.82314	-0.87099	-0.91707	-0.90978	-0.87663	-0.89732	-0.87414	0	-0.87655	-0.8739	-0.85958	-0.88389	-0.86388	0	0	0	0	0	0	0	0	0	0	0	0	0	0	0	0	0	0	0	0	0	0	0	0	0	0	0	0	0	0	0	0
Q12906	0	0	0	-0.81997	-0.82658	-0.88561	-0.92786	-0.91745	-0.90649	-0.88176	-0.87852	-0.8029	-0.83111	-0.83273	-0.8251	-0.91071	-0.88656	0	0	0	0	0	0	0	0	0	0	0	0	0	-0.80226	0	0	0	0	0	0	0	0	0	0	0	0	0	0	0	0	0	0
P39023	0	0	0	-0.80625	-0.80921	-0.92033	-0.89431	-0.88278	-0.8672	-0.84961	-0.83972	0	0	0	-0.81351	-0.85783	-0.82129	0	0	0	0	0	0	0	0	0	0	0	0	0	0	0	0	0	0	0	0	0	0	0	0	0	0	0	0	0	0	0	0
Q13200	0	0	0	0	0	-0.8784	-0.90684	-0.90214	-0.86499	-0.85458	-0.82705	0	0	0	-0.83948	-0.89888	-0.85716	0	0	0	0	0	0	0	0	0	0	0	0	0	0	0	0	0	0	0	0	0	0	0	0	0	0	0	0	0	0	0	0
O00231	0	-0.81263	-0.81154	-0.81082	-0.8194	-0.86737	-0.9075	-0.88822	-0.8828	-0.85058	-0.84976	0	0	0	-0.83866	-0.87806	-0.82721	0	0	0	0	0	0	0	0	0	0	0	0	0	-0.80324	0	0	0	0	0	0	0	0	0	0	0	0	0	0	0	0	0	0
P35268	0	-0.83692	0	-0.84353	-0.8769	-0.90951	-0.91764	-0.89478	-0.90025	-0.87468	-0.87549	-0.81812	-0.86068	-0.83324	0	-0.85629	-0.82641	0	0	0	0	0	0	0	0	0	0	0	0	0	0	0	0	0	0	0	0	0	0	0	0	0	0	0	0	0	0	0	0
P42677	0	-0.83753	0	-0.85543	-0.88385	-0.89467	-0.91933	-0.89973	-0.90797	-0.8762	-0.88976	-0.84263	-0.86463	-0.84125	-0.80385	-0.86806	-0.83414	0	0	0	0	0	0	0	0	0	0	0	0	0	-0.84368	0	0	0	0	0	0	0	0	0	0	0	0	0	0	0	0	0	0
P05141	0	-0.84864	-0.80669	0	0	-0.87354	-0.82516	0	-0.8027	0	-0.80695	0	-0.80528	0	0	0	0	0	0	0	0	0	0	0	0	0	0	0	0	0	0	0	0	0	0	0	0	0	0	0	0	0	0	0	-0.83909	0	0	0	0
P40616	0	-0.83019	0	-0.80001	0	-0.84407	-0.83007	-0.80235	-0.81226	0	-0.82435	0	-0.80299	0	0	0	0	0	0	0	0	0	0	0	0	0	-0.80792	0	0	0	0	0	0	0	0	0	0	0	0	0	0	0	0	0	-0.8092	0	0	0	0
Q9NZB2	0	0	0	0	0	-0.85939	-0.85292	-0.83474	-0.81624	0	-0.80872	0	0	0	0	-0.82646	0	0	0	0	0	0	0	0	0	0	-0.82679	0	0	0	0	0	0	0	0	0	0	0	0	0	0	0	0	0	0	0	0	0	0
O00764	0	0	0	0	0	-0.86822	-0.81956	0	0	0	0	0	0	0	0	0	0	0	0	0	0	0	0	0	0	0	0	0	0	0	0	0	0	0	0	0	0	0	0	0	0	0	0	0	0	0	0	0	0
P62753	0	0	0	0	0	-0.89541	-0.85901	-0.8526	-0.82378	-0.82626	-0.83116	0	-0.81391	0	0	-0.82264	-0.80623	0	0	0	0	0	0	0	0	0	-0.82901	0	0	0	0	0	0	0	0	0	0	0	0	0	0	0	0	0	0	0	0	0	0
P15531	0	0	0	0	-0.81901	-0.85947	-0.86234	-0.86762	-0.83277	-0.85141	-0.83419	-0.84051	-0.84454	-0.83902	-0.84236	-0.80969	0	0	-0.80373	0	0	0	0	0	0	0	0	0	0	0	0	0	0	0	0	0	0	0	0	0	0	0	0	0	0	0	0	0	0
P16949	0	0	-0.82942	0	0	-0.83893	-0.89984	-0.89701	-0.85241	-0.86056	-0.84109	-0.81065	0	0	-0.90584	-0.88164	-0.8351	0	0	0	0	0	0	0	0	0	0	0	0	0	0	0	0	0	0	0	0	0	0	0	0	0	0	0	0	0	0	0	0
P30048	-0.87869	-0.87272	-0.87531	-0.88723	0	-0.93571	-0.88057	-0.86009	-0.84908	-0.84531	-0.84526	-0.83105	-0.83513	-0.81078	0	-0.82406	0	0	-0.83618	0	0	0	0	-0.81584	0	-0.80719	0	0	0	-0.86316	0	0	0	0	0	0	0	0	0	0	0	-0.80242	-0.84871	0	-0.8189	0	0	0	0
Q13283	0	0	-0.82816	-0.82573	-0.81676	-0.95423	-0.88599	-0.88846	-0.85762	-0.88189	-0.86761	-0.82781	-0.8393	-0.83888	-0.87214	-0.82156	-0.80145	0	0	0	0	0	0	0	0	0	0	0	0	0	0	0	0	0	0	0	0	0	0	0	0	0	0	0	0	0	0	0	0
P00491	-0.81426	-0.82212	-0.83772	-0.84429	0	-0.90984	-0.92411	-0.91728	-0.88612	-0.91172	-0.9126	-0.84611	-0.90186	-0.89073	-0.83607	-0.92319	-0.90271	0	0	0	0	0	0	0	0	0	-0.83443	0	-0.81586	-0.81418	0	0	0	0	0	0	0	0	0	0	0	0	0	0	0	0	0	0	0
Q9H3R2	-0.8835	-0.8845	-0.88036	-0.8927	0	-0.91794	-0.90398	-0.88814	-0.86318	-0.87322	-0.87727	-0.85189	-0.87319	-0.85092	-0.82687	-0.87381	-0.81425	0	0	0	0	0	0	-0.82122	0	-0.80009	-0.82207	0	-0.80651	-0.88135	0	0	0	0	0	0	0	0	0	0	0	0	-0.84227	0	-0.8152	0	0	0	0
P53396	0	0	0	-0.82557	0	-0.95566	-0.87271	-0.87643	-0.84032	-0.84474	-0.83363	0	0	0	-0.82737	-0.83487	0	0	0	0	0	0	0	0	0	0	-0.8495	0	0	0	0	0	0	0	0	0	0	0	0	0	0	0	0	0	0	0	0	0	0
P06748	-0.8068	-0.81695	-0.82045	-0.82551	0	-0.92256	-0.90286	-0.89113	-0.84289	-0.86298	-0.84667	0	-0.844	-0.82324	-0.83606	-0.88831	-0.8332	0	0	0	0	0	0	0	0	0	-0.80195	0	0	0	0	0	0	0	0	0	0	0	0	0	0	0	0	0	0	0	0	0	0
P39687	0	-0.80683	-0.80268	0	0	-0.8842	-0.89567	-0.89643	-0.84818	-0.86326	-0.85204	0	-0.81583	-0.81553	-0.90275	-0.87461	-0.84131	0	0	0	0	0	0	0	0	0	-0.81772	0	0	0	0	0	0	0	0	0	0	0	0	0	0	0	0	0	0	0	0	0	0
P00492	-0.81202	-0.82669	-0.8369	0	0	-0.88153	-0.86089	-0.85161	-0.81072	-0.81729	-0.81714	0	0	0	-0.86788	-0.83873	0	0	0	0	0	0	0	0	0	0	0	0	0	0	0	0	0	0	0	0	0	0	0	0	0	0	0	-0.8061	-0.80396	0	0	0	0
Q14974	0	0	-0.80345	0	0	-0.91463	-0.90774	-0.90605	-0.85242	-0.87421	-0.84546	0	0	-0.80514	-0.86954	-0.90437	-0.8638	0	0	0	0	0	0	0	0	0	0	0	0	0	0	0	0	0	0	0	0	0	0	0	0	0	0	0	0	0	0	0	0
P05387	0	-0.82182	-0.84635	-0.83022	-0.84373	-0.92499	-0.94873	-0.92961	-0.92694	-0.92019	-0.91634	-0.84872	-0.88611	-0.87397	-0.83157	-0.92093	-0.89308	0	0	0	0	0	0	-0.81489	0	0	0	0	0	0	0	0	0	0	0	0	0	0	0	0	0	0	0	0	0	0	0	0	0
Q9ULZ3	0	-0.81653	-0.83677	-0.8094	-0.80365	-0.94608	-0.88434	-0.8697	-0.86747	-0.8797	-0.88071	0	-0.86488	-0.85205	-0.81595	-0.84746	-0.8138	0	0	0	0	0	0	0	0	0	-0.80358	0	0	0	0	0	0	0	0	0	0	0	0	0	0	0	0	0	0	0	0	0	0
P61923	0	-0.81229	-0.84179	0	-0.81507	-0.92192	-0.87973	-0.85878	-0.85197	-0.8485	-0.86132	0	-0.83794	0	-0.80653	-0.83558	0	0	0	0	0	0	0	0	0	0	0	0	0	0	0	0	0	0	0	0	0	0	0	0	0	0	0	0	0	0	0	0	0
P62913	0	0	0	0	-0.83521	-0.87716	-0.88152	-0.861	-0.88168	-0.8361	-0.86907	0	-0.81861	0	0	-0.85097	-0.83744	0	0	0	0	0	0	0	0	0	-0.80096	0	0	0	0	0	0	0	0	0	0	0	0	0	0	0	0	0	0	0	0	0	0
O75369	0	0	0	-0.84155	-0.86565	-0.9354	-0.91714	-0.91247	-0.92284	-0.88686	-0.89889	-0.8596	-0.82058	-0.82775	-0.8195	-0.86996	-0.85867	0	0	0	0	0	0	-0.80073	0	0	-0.82725	0	0	0	0	0	0	0	0	0	0	0	0	0	0	0	0	0	0	0	0	0	0
P11172	0	-0.83254	-0.82306	-0.8467	-0.81496	-0.96797	-0.88003	-0.86056	-0.84633	-0.84169	-0.84495	-0.8109	-0.84577	-0.80148	0	-0.81244	0	0	0	0	0	0	0	0	0	0	0	0	0	0	0	0	0	0	0	0	0	0	0	0	0	0	0	0	0	0	0	0	0
P61204	0	-0.82769	-0.8364	-0.85409	-0.84333	-0.93514	-0.92926	-0.92607	-0.90479	-0.91987	-0.91671	-0.84421	-0.88063	-0.88615	-0.88133	-0.89566	-0.86887	0	0	0	0	0	0	0	0	0	-0.86388	0	0	0	0	0	0	0	0	0	0	0	0	0	0	0	0	0	0	0	0	0	0
Q01844	0	-0.8341	-0.85173	-0.84446	-0.8252	-0.95484	-0.89951	-0.88834	-0.87674	-0.89328	-0.89827	-0.8076	-0.87745	-0.85931	-0.83778	-0.85613	-0.82791	0	0	0	0	0	0	0	0	0	-0.82558	0	0	0	0	0	0	0	0	0	0	0	0	0	0	0	0	0	0	0	0	0	0
P52701	0	0	0	0	-0.8454	-0.84009	-0.90113	-0.89509	-0.88525	-0.84209	-0.82912	-0.83304	-0.80618	0	0	-0.83875	-0.85634	-0.86227	0	0	0	0	0	0	0	0	0	0	0	0	0	0	0	0	0	0	0	0	0	0	0	0	0	0	0	0	0	0	0
Q02543	0	0	0	-0.80854	-0.83904	-0.90909	-0.89606	-0.90579	-0.87257	-0.88457	-0.87172	-0.85122	-0.86484	-0.85869	-0.81691	-0.84459	-0.8621	0	0	0	0	0	0	0	0	0	0	0	0	0	0	0	0	0	0	0	0	0	0	0	0	0	0	0	0	0	0	0	0
Q9Y3T9	-0.81632	-0.8256	0	-0.87302	0	-0.91486	-0.86778	-0.85674	-0.82786	-0.81646	-0.80399	0	0	0	0	-0.81674	0	0	0	0	0	0	0	0	0	0	-0.80387	0	0	0	0	0	0	0	0	0	0	0	0	0	0	0	0	0	0	0	0	0	0
O14561	-0.82114	-0.86539	-0.82686	-0.84177	0	-0.88698	-0.87617	-0.84807	-0.81962	-0.81676	-0.81793	0	-0.83645	0	0	-0.84075	0	0	0	0	0	0	0	0	0	0	0	0	0	0	0	0	0	0	0	0	0	0	0	0	0	-0.80374	-0.83959	-0.85378	-0.8679	0	0	0	0
P22392	0	-0.82436	0	0	0	-0.89509	-0.84496	-0.82267	0	0	0	0	0	0	0	-0.80668	0	0	0	0	0	0	0	0	0	0	0	0	0	0	0	0	0	0	0	0	0	0	0	0	0	0	0	-0.83575	-0.8476	0	0	0	0
Q03518	0	0	0	0	0	-0.80772	0	0	0	0	0	0	0	0	-0.80182	0	0	0	0	0	0	0	0	0	0	0	0	0	0	0	0	0	0	0	0	0	0	0	0	0	0	0	0	0	0	0	0	0	0
Q96KR1	0	0	0	-0.81273	-0.81131	-0.83361	-0.83126	-0.85144	-0.83726	-0.82369	-0.83148	-0.81222	0	0	-0.86566	0	0	0	0	0	0	0	0	0	0	0	-0.84945	0	0	0	0	0	0	0	0	0	0	0	0	0	0	0	0	0	0	0	0	0	0
Q01081	0	0	0	-0.84443	0	-0.87902	-0.85273	-0.8627	-0.83243	-0.81879	0	0	0	0	-0.83341	0	0	0	0	0	0	0	0	0	0	0	0	0	0	0	0	0	0	0	0	0	0	0	0	0	0	0	0	0	0	0	0	0	0
Q9UQE7	-0.85462	0	0	-0.85388	0	-0.87763	-0.90891	-0.9303	-0.8672	-0.89411	-0.86266	-0.83925	0	-0.83376	-0.92896	-0.88569	-0.85884	0	-0.80876	0	0	0	0	-0.80403	0	0	-0.81894	0	0	0	0	0	0	0	0	0	0	0	0	0	0	0	0	0	0	0	0	0	0
P63104	-0.85499	0	0	-0.8021	0	-0.83954	-0.90937	-0.90818	-0.8712	-0.84621	-0.80725	0	0	0	-0.87063	-0.87823	-0.82497	-0.84195	-0.85803	0	0	0	0	0	0	0	0	0	0	0	0	0	0	0	0	0	0	0	0	0	0	0	0	0	0	0	0	0	0
O14980	-0.81318	0	0	-0.80696	0	-0.82502	-0.85279	-0.85575	-0.83776	0	0	0	0	0	-0.83267	-0.82833	0	-0.81304	-0.8273	0	0	0	0	0	0	0	0	0	0	0	0	0	0	0	0	0	0	0	0	0	0	0	0	0	0	0	0	0	0
Q9UNM6	-0.82207	0	0	-0.83606	-0.81126	-0.83771	-0.91178	-0.91366	-0.89246	-0.86054	-0.82937	0	0	0	-0.84615	-0.87236	-0.84225	-0.84457	-0.84944	0	0	0	0	0	0	0	0	0	0	0	0	0	0	0	0	0	0	0	0	0	0	0	0	0	0	0	0	0	0
O15212	-0.80224	0	0	0	0	-0.84967	-0.86247	-0.84721	-0.8088	0	0	0	0	0	-0.83348	-0.83416	0	0	0	0	0	0	0	0	0	0	0	0	0	0	0	0	0	0	0	0	0	0	0	0	0	0	0	0	0	0	0	0	0
P11586	-0.81048	0	0	-0.82742	0	-0.89632	-0.8712	-0.86775	-0.82211	-0.8164	0	0	0	0	-0.85562	-0.82621	0	0	0	0	0	0	0	0	0	0	0	0	0	0	0	0	0	0	0	0	0	0	0	0	0	0	0	0	0	0	0	0	0
P50570	-0.80801	0	0	-0.90176	-0.80458	-0.88498	-0.88001	-0.87351	-0.86909	-0.83237	-0.839	0	0	0	-0.81026	-0.82439	0	0	0	0	0	0	0	-0.82139	0	0	-0.83026	0	0	0	0	0	0	0	0	0	0	0	0	0	0	0	0	0	0	0	0	0	0
Q9H4A4	0	-0.82651	0	-0.89314	-0.84492	-0.90012	-0.84677	-0.83834	-0.8383	-0.80244	-0.81904	0	0	0	-0.80753	0	0	0	0	0	0	0	0	0	0	-0.81603	-0.83874	0	0	0	0	0	0	0	0	0	0	0	0	0	0	0	0	0	0	0	0	0	0
P10809	-0.88374	-0.8985	-0.8599	-0.91594	-0.86095	-0.91889	-0.92512	-0.90021	-0.90971	-0.87263	-0.88469	-0.86793	-0.85488	-0.82762	-0.80839	-0.85807	-0.80624	-0.81803	-0.87037	0	0	0	0	-0.85538	-0.83454	-0.83794	0	0	0	-0.83752	0	0	0	0	0	0	0	0	0	0	0	-0.80916	-0.83237	0	-0.81951	0	0	0	0
P40926	-0.86949	-0.88555	-0.85457	-0.90695	-0.85136	-0.91552	-0.93226	-0.90436	-0.90256	-0.8747	-0.87159	-0.8738	-0.85624	-0.82655	0	-0.86458	-0.80526	0	-0.85791	0	0	0	0	-0.85556	-0.82948	-0.84328	0	0	0	-0.81387	0	0	0	0	0	0	0	0	0	0	0	-0.81058	-0.84698	0	-0.81415	0	0	0	0
P22087	0	-0.81508	-0.83724	-0.87649	-0.85349	-0.93947	-0.93566	-0.91618	-0.92362	-0.88785	-0.89229	-0.84627	-0.81833	-0.8172	-0.81671	-0.89255	-0.84253	0	0	0	0	0	0	-0.83092	0	0	-0.82193	0	0	0	0	0	0	0	0	0	0	0	0	0	0	0	0	0	0	0	0	0	0
P63244	-0.8105	-0.84664	-0.87377	-0.86663	-0.84972	-0.94231	-0.93443	-0.9195	-0.90832	-0.89743	-0.892	-0.83019	-0.83035	-0.83068	-0.87454	-0.8862	-0.83593	0	0	0	0	0	0	-0.8252	0	0	-0.82019	0	0	0	0	0	0	0	0	0	0	0	0	0	0	0	0	0	0	0	0	0	0
P09651	-0.81017	-0.82038	-0.83008	-0.85265	-0.84728	-0.94893	-0.93717	-0.91684	-0.92233	-0.88953	-0.87949	-0.8247	-0.82375	-0.82315	-0.82254	-0.88731	-0.84299	0	0	0	0	0	0	-0.80395	0	0	0	0	0	0	0	0	0	0	0	0	0	0	0	0	0	0	0	0	0	0	0	0	0
Q14103	-0.83925	-0.87174	-0.86883	-0.87958	-0.86779	-0.96131	-0.92924	-0.91543	-0.91607	-0.9081	-0.90482	-0.83899	-0.8679	-0.86556	-0.86549	-0.8664	-0.82664	0	0	0	0	0	0	-0.81852	0	0	0	0	0	0	0	0	0	0	0	0	0	0	0	0	0	0	0	0	0	0	0	0	0
P22234	-0.87561	-0.84463	-0.84824	-0.86922	0	-0.85732	-0.86741	-0.8521	-0.83972	-0.81516	-0.82179	0	0	0	-0.83191	-0.83193	0	0	-0.83031	0	0	0	0	0	0	0	-0.80174	0	0	-0.83043	0	0	0	0	0	0	0	0	0	0	0	0	0	0	0	0	0	0	0
P50995	-0.8959	-0.85596	-0.86763	-0.93015	-0.87937	-0.85265	-0.95805	-0.95406	-0.95565	-0.93239	-0.93731	-0.89559	-0.82122	-0.86647	-0.89684	-0.92109	-0.88506	0	-0.81669	-0.84407	-0.86604	0	-0.80356	-0.9167	-0.85002	-0.82951	-0.84316	0	-0.80696	-0.82984	-0.81971	0	0	-0.82272	0	0	0	0	0	0	0	0	0	0	0	0	0	0	0
O00567	-0.81438	-0.83435	0	-0.88926	-0.88097	-0.8851	-0.92635	-0.91001	-0.93148	-0.88732	-0.89908	-0.83331	-0.82621	-0.83626	-0.80739	-0.87831	-0.84552	0	-0.81506	-0.80068	-0.82082	0	0	-0.81977	-0.80558	-0.81807	0	0	0	0	-0.85381	0	0	0	0	0	0	0	0	0	0	0	0	0	0	0	0	0	0
Q04637	-0.87638	-0.82175	-0.81623	-0.8943	-0.8645	-0.87516	-0.95459	-0.9515	-0.95128	-0.92891	-0.92745	-0.87508	-0.84	-0.8776	-0.87082	-0.93013	-0.89715	-0.845	-0.85557	-0.82002	-0.86814	0	-0.82202	-0.85523	-0.81068	-0.80869	-0.81322	0	0	-0.82549	-0.82836	0	0	0	0	0	0	0	0	0	0	0	0	0	0	0	0	0	0
P62316	-0.82676	-0.84453	-0.86426	-0.86732	-0.85537	-0.91728	-0.90332	-0.88715	-0.91931	-0.88232	-0.88949	0	0	-0.81591	-0.84289	-0.84447	-0.80592	0	0	0	0	0	0	-0.81857	0	0	0	0	0	0	-0.80968	0	0	0	0	0	0	0	0	0	0	0	0	0	0	0	0	0	0
Q99623	0	-0.83628	-0.83322	-0.88465	-0.89136	-0.95608	-0.92779	-0.91591	-0.94109	-0.91255	-0.91527	-0.84255	-0.84437	-0.86259	-0.83538	-0.85815	-0.83738	0	0	0	0	0	0	-0.82559	0	0	0	0	0	0	0	0	0	0	0	0	0	0	0	0	0	0	0	0	0	0	0	0	0
P08238	-0.87567	-0.84531	-0.86933	-0.86845	-0.81399	-0.92162	-0.90382	-0.88892	-0.90141	-0.85995	-0.86981	-0.80163	0	0	-0.84935	-0.85709	-0.80939	0	-0.80977	0	0	0	0	-0.82446	0	0	0	0	0	-0.80425	0	0	0	0	0	0	0	0	0	0	0	0	0	0	0	0	0	0	0
P14866	-0.82981	-0.80949	-0.83476	-0.86201	-0.82821	-0.92586	-0.88858	-0.88262	-0.88889	-0.84779	-0.85038	0	0	0	-0.86588	-0.82888	0	0	0	0	0	0	0	-0.80273	0	0	-0.80797	0	0	0	0	0	0	0	0	0	0	0	0	0	0	0	0	0	0	0	0	0	0
P22626	-0.84119	-0.81353	-0.83543	-0.84899	-0.82072	-0.90702	-0.88143	-0.88278	-0.87082	-0.86147	-0.84888	0	0	0	-0.89681	-0.82094	0	0	-0.804	0	0	0	0	0	0	0	0	0	0	0	0	0	0	0	0	0	0	0	0	0	0	0	0	0	0	0	0	0	0
Q99460	-0.89344	-0.86256	-0.86713	-0.88964	-0.89005	-0.87305	-0.9462	-0.9262	-0.95874	-0.90865	-0.91033	-0.85359	-0.81049	-0.83965	-0.8477	-0.8891	-0.84859	-0.82721	-0.84863	0	-0.83679	0	0	-0.88239	-0.82829	0	0	0	0	0	-0.80957	0	0	-0.80065	0	0	0	0	0	0	0	0	0	0	0	0	0	0	0
Q99832	-0.82816	-0.81714	-0.83948	-0.81045	-0.84421	-0.87903	-0.90271	-0.88035	-0.90227	-0.85241	-0.84907	0	0	0	-0.83353	-0.85061	0	0	0	0	0	0	0	0	0	0	0	0	0	0	0	0	0	0	0	0	0	0	0	0	0	0	0	0	0	0	0	0	0
P63241	0	0	0	-0.81508	0	-0.88634	-0.84575	-0.83976	-0.80879	0	0	0	0	0	-0.8533	0	0	0	0	0	0	0	0	0	0	0	0	0	0	0	0	0	0	0	0	0	0	0	0	0	0	0	0	0	0	0	0	0	0
Q7L1Q6	0	-0.80829	-0.82376	-0.83534	-0.84095	-0.91319	-0.87811	-0.85998	-0.87875	-0.81726	-0.82595	0	0	0	-0.82719	-0.80646	0	0	0	0	0	0	0	0	0	0	0	0	0	0	0	0	0	0	0	0	0	0	0	0	0	0	0	0	0	0	0	0	0
Q07021	-0.88714	-0.91917	-0.89572	-0.9104	-0.8719	-0.87334	-0.91506	-0.8966	-0.87691	-0.89329	-0.87304	-0.86305	-0.86102	-0.85258	-0.86014	-0.82187	0	0	-0.84279	0	-0.81495	0	-0.81117	-0.88395	-0.86659	-0.85988	0	0	0	0	0	0	0	-0.87072	0	0	0	0	0	0	0	-0.83087	-0.83324	0	0	0	0	0	0
Q13151	-0.86641	-0.85885	-0.85819	-0.90557	-0.8445	-0.93166	-0.90562	-0.90659	-0.88025	-0.88505	-0.86757	-0.84415	-0.80343	-0.8282	-0.90427	-0.82632	0	0	-0.83729	0	0	0	0	-0.83786	0	-0.80795	0	0	0	0	0	0	0	0	0	0	0	0	0	0	0	0	0	0	0	0	0	0	0
P05388	0	-0.87841	-0.82234	-0.8865	-0.94666	-0.86591	-0.90453	-0.89361	-0.92709	-0.90292	-0.95045	-0.91068	-0.92309	-0.89753	-0.82387	-0.82955	-0.83398	0	0	-0.82287	-0.80433	0	0	-0.85833	0	0	-0.83003	0	-0.84229	0	-0.84831	0	0	0	-0.82227	-0.8072	-0.84833	0	0	0	0	0	0	0	0	0	0	0	0
Q96C19	-0.85518	-0.91224	-0.8778	-0.90643	-0.90431	-0.89581	-0.93316	-0.92692	-0.92192	-0.95415	-0.96088	-0.91492	-0.97092	-0.96387	-0.87664	-0.87067	-0.85308	0	0	-0.83278	-0.87435	-0.81965	-0.871	-0.87035	-0.81431	-0.84251	-0.80059	0	-0.8539	-0.82498	-0.84564	0	0	-0.84538	-0.80915	-0.87403	-0.82782	0	0	0	0	0	0	0	0	0	0	0	0
O75964	-0.8029	-0.83666	-0.81599	-0.84847	-0.87651	-0.86761	-0.93679	-0.92703	-0.93315	-0.94047	-0.95011	-0.85641	-0.92608	-0.92358	-0.83136	-0.90785	-0.91216	0	0	0	-0.84258	0	-0.8168	-0.82851	0	0	0	0	0	0	-0.8186	0	0	-0.81136	0	0	0	0	0	0	0	0	0	0	0	0	0	0	0
P53007	0	0	-0.81195	-0.8449	-0.85192	-0.87492	-0.90371	-0.89828	-0.91731	-0.9079	-0.91998	-0.80451	-0.83422	-0.86834	-0.8348	-0.88027	-0.85571	0	0	0	-0.845	0	-0.80164	-0.80116	0	0	-0.84128	0	0	0	-0.85931	0	0	0	0	0	0	0	0	0	0	0	0	0	0	0	0	0	0
Q9BUJ2	-0.80369	-0.81221	-0.84053	-0.82233	-0.83343	-0.89219	-0.91221	-0.89877	-0.91495	-0.91728	-0.92119	-0.80747	-0.87461	-0.88928	-0.82326	-0.89315	-0.86327	0	0	0	-0.83137	0	-0.80842	0	0	0	0	0	0	0	-0.83329	0	0	0	0	0	0	0	0	0	0	0	0	0	0	0	0	0	0
O14818	-0.80885	-0.83081	-0.8057	-0.83142	-0.86272	-0.89556	-0.91783	-0.91042	-0.91612	-0.9057	-0.9057	-0.80411	-0.85961	-0.87412	-0.86106	-0.87912	-0.85977	0	0	0	-0.80341	0	0	0	0	0	0	0	0	0	-0.83948	0	0	0	0	0	0	0	0	0	0	0	0	0	0	0	0	0	0
Q07955	-0.84287	-0.88713	-0.87349	-0.8602	-0.84224	-0.89487	-0.89579	-0.87301	-0.89602	-0.87057	-0.88565	0	-0.82965	-0.82912	-0.83492	-0.84707	0	0	0	0	0	0	0	0	0	0	0	0	0	0	-0.86137	0	0	0	0	0	0	0	0	0	0	0	0	0	0	0	0	0	0
Q15424	0	-0.82135	-0.81721	-0.84937	-0.82708	-0.91591	-0.88853	-0.86397	-0.89273	-0.86538	-0.87995	0	-0.82878	-0.82425	0	-0.85034	-0.80606	0	0	0	0	0	0	0	0	0	-0.80468	0	0	0	-0.84671	0	0	0	0	0	0	0	0	0	0	0	0	0	0	0	0	0	0
P25705	0	-0.84646	-0.8047	-0.88887	-0.92085	-0.86371	-0.90803	-0.90629	-0.90009	-0.91357	-0.91196	-0.87782	-0.8813	-0.89539	-0.86096	-0.83188	-0.8059	0	0	-0.86229	-0.87339	-0.81723	-0.84988	-0.83651	-0.80935	-0.84835	-0.80757	0	0	0	-0.85043	0	0	0	0	0	0	0	0	0	0	0	0	0	0	0	0	0	0
P61163	0	-0.83596	0	-0.89562	-0.9558	-0.85353	-0.91427	-0.90121	-0.92728	-0.88778	-0.90447	-0.90093	-0.85635	-0.85011	0	-0.81817	-0.81327	0	0	-0.84903	-0.82396	0	0	-0.86203	-0.85647	-0.83266	0	0	0	0	0	0	0	0	0	0	0	0	0	0	0	0	0	0	0	0	0	0	0
Q6NUK1	0	-0.84633	0	-0.84414	-0.88753	-0.82213	-0.83502	-0.82301	-0.8533	-0.8425	-0.88718	0	-0.84664	-0.8308	0	0	0	0	0	0	0	0	0	0	0	0	-0.83815	0	0	0	-0.87191	0	0	0	0	0	0	0	0	0	0	0	0	0	0	0	0	0	0
O94973	0	0	0	-0.81083	-0.86282	-0.8704	-0.89199	-0.87633	-0.89607	-0.86186	-0.85966	0	-0.81838	-0.82709	0	-0.84524	-0.81396	0	0	0	0	0	0	0	0	0	0	0	0	0	-0.85126	0	0	0	0	0	0	0	0	0	0	0	0	0	0	0	0	0	0
P46779	0	0	0	0	-0.82668	-0.82451	-0.83586	-0.82305	-0.83721	0	-0.80664	0	0	0	0	0	0	0	0	0	0	0	0	0	0	0	0	0	0	0	0	0	0	0	0	0	0	0	0	0	0	0	0	0	0	0	0	0	0
P31689	0	0	0	0	0	-0.83373	-0.82914	-0.82576	-0.80874	-0.82108	-0.83115	0	0	0	0	-0.83416	-0.83722	0	0	0	0	0	0	0	0	0	0	0	0	0	0	0	0	0	0	0	0	0	0	0	0	0	0	0	0	0	0	0	0
Q92882	0	0	0	0	0	-0.85465	0	0	0	0	0	0	0	0	0	0	0	0	0	0	0	0	0	0	0	0	-0.81447	0	0	0	0	0	0	0	0	0	0	0	0	0	0	0	0	0	0	0	0	0	0
P08708	0	0	0	0	0	-0.8672	-0.83543	-0.80964	-0.82529	0	-0.81063	0	0	0	0	0	0	0	0	0	0	0	0	0	0	0	0	0	0	0	0	0	0	0	0	0	0	0	0	0	0	0	0	0	0	0	0	0	0
P32322	0	0	0	0	0	-0.84114	-0.84584	-0.82262	-0.80335	-0.80359	-0.80014	0	0	0	0	-0.84838	-0.81119	0	0	0	0	0	0	0	0	0	0	0	0	0	0	0	0	0	0	0	0	0	0	0	0	0	0	0	0	0	0	0	0
P09467	0	0	0	-0.8071	0	-0.93241	-0.83353	-0.83104	-0.81833	-0.82576	-0.84295	0	-0.82796	-0.80707	0	0	0	0	0	0	0	0	0	0	0	0	-0.84002	0	0	0	0	0	0	0	0	0	0	0	0	0	0	0	0	0	0	0	0	0	0
Q8IWB7	0	0	0	0	0	-0.9128	-0.8412	-0.83207	-0.84565	-0.8193	-0.82331	0	0	0	0	-0.80579	0	0	0	0	0	0	0	0	0	0	0	0	0	0	0	0	0	0	0	0	0	0	0	0	0	0	0	0	0	0	0	0	0
Q14980	0	0	0	0	-0.83601	-0.86691	-0.87425	-0.86893	-0.887	-0.84326	-0.84677	0	0	0	0	-0.84078	-0.82218	0	0	0	0	0	0	0	0	0	0	0	0	0	0	0	0	0	0	0	0	0	0	0	0	0	0	0	0	0	0	0	0
P46782	0	0	0	0	-0.86795	-0.9109	-0.89684	-0.87449	-0.9039	-0.85996	-0.85808	0	-0.80109	0	0	-0.83495	-0.81084	0	0	0	0	0	0	0	0	0	0	0	0	0	0	0	0	0	0	0	0	0	0	0	0	0	0	0	0	0	0	0	0
O60832	0	-0.83261	-0.82483	-0.84917	-0.84381	-0.9323	-0.84943	-0.82102	-0.87377	-0.82485	-0.8635	0	-0.80349	0	0	0	0	0	0	0	0	0	0	0	0	0	0	0	0	0	-0.80459	0	0	0	0	0	0	0	0	0	0	0	0	0	0	0	0	0	0
O00116	0	0	0	-0.81399	-0.8166	-0.90616	-0.86287	-0.83567	-0.88823	-0.82451	-0.8443	0	0	0	0	-0.81142	0	0	0	0	0	0	0	0	0	0	0	0	0	0	0	0	0	0	0	0	0	0	0	0	0	0	0	0	0	0	0	0	0
P39019	0	-0.82604	-0.83819	-0.82311	-0.86909	-0.91507	-0.88265	-0.85364	-0.90578	-0.85762	-0.87757	0	-0.80648	0	0	-0.81706	0	0	0	0	0	0	0	0	0	0	0	0	0	0	-0.8023	0	0	0	0	0	0	0	0	0	0	0	0	0	0	0	0	0	0
P33991	0	0	-0.81712	0	0	-0.83382	-0.84329	-0.82463	-0.81777	-0.82648	-0.8345	0	-0.80554	0	0	-0.82202	0	0	0	0	0	0	0	0	0	0	0	0	0	0	0	0	0	0	0	0	0	0	0	0	0	0	0	0	0	0	0	0	0
P15153	0	-0.81824	0	0	-0.83723	-0.86217	-0.88876	-0.87849	-0.87427	-0.90766	-0.90835	-0.80161	-0.92022	-0.91064	-0.80959	-0.8568	-0.84937	0	0	0	-0.80491	0	0	0	0	0	0	0	0	0	-0.82914	0	0	0	0	0	0	0	0	0	0	0	0	0	0	0	0	0	0
P51659	0	-0.81042	-0.81711	-0.81973	0	-0.94529	-0.81672	0	-0.80672	-0.80818	-0.8403	0	-0.83915	0	0	0	0	0	0	0	0	0	0	0	0	0	-0.83663	0	0	0	0	0	0	0	0	0	0	0	0	0	0	0	0	0	0	0	0	0	0
O43169	-0.87365	-0.86856	-0.81618	-0.85531	0	-0.81616	-0.88714	-0.85494	-0.85981	-0.80005	-0.81044	-0.80703	0	0	0	-0.83018	0	-0.84823	-0.83923	0	0	0	0	-0.82035	-0.82623	0	0	0	0	0	0	0	0	0	0	0	0	0	0	0	0	-0.85978	-0.82581	-0.83345	-0.86766	0	-0.84573	0	0
Q9NQR4	-0.94677	-0.90214	-0.86383	-0.85418	0	0	-0.8969	-0.88164	-0.84861	-0.85349	-0.84247	-0.83624	-0.83165	-0.81988	-0.86661	-0.8516	0	-0.83457	-0.89128	0	0	0	0	-0.84319	-0.84673	0	0	0	0	-0.83327	0	0	0	-0.81138	0	0	0	0	0	-0.87178	0	-0.85008	-0.8123	-0.80386	-0.81732	0	0	0	0
P82673	-0.87745	-0.84258	-0.83667	-0.87712	0	-0.84858	-0.92702	-0.9096	-0.88916	-0.89342	-0.85266	-0.85915	-0.82275	-0.84477	-0.80976	-0.86651	-0.82343	0	-0.82526	0	0	0	0	-0.85846	-0.80432	-0.81643	0	0	0	0	0	0	0	-0.80445	0	0	0	0	0	0	0	-0.80327	0	0	0	0	0	0	0
Q9Y365	-0.9163	-0.90919	-0.89426	-0.93895	0	-0.86189	-0.91304	-0.89045	-0.87684	-0.86446	-0.86347	-0.87606	-0.82331	-0.81551	-0.80987	-0.85404	0	0	-0.81873	0	0	0	0	-0.89799	-0.83947	-0.8561	0	0	-0.83074	-0.82698	0	0	0	-0.81366	0	0	0	0	0	0	0	-0.91006	-0.89107	-0.81717	-0.82164	0	0	0	0
P25685	-0.86812	-0.8266	-0.82169	-0.80966	0	0	-0.87625	-0.8718	-0.80737	-0.83735	-0.81718	-0.8367	-0.80453	0	-0.85892	-0.82751	-0.80682	0	0	0	0	0	0	-0.85139	-0.83623	0	0	0	0	0	0	0	0	-0.83471	0	0	0	0	0	-0.82188	0	-0.80558	0	0	0	0	0	0	0
Q9UDY2	-0.83273	0	-0.84635	-0.85472	0	-0.88391	-0.88988	-0.89136	-0.83898	-0.8755	-0.84186	-0.86352	0	-0.80474	-0.84511	-0.83757	0	0	0	0	0	0	0	-0.86998	0	0	0	0	0	-0.80412	0	0	0	0	0	0	0	0	0	0	0	0	0	0	0	0	0	0	0
Q16762	-0.82668	-0.86335	-0.89873	-0.85403	0	-0.87668	-0.83025	-0.80989	0	-0.805	-0.80915	-0.8242	0	0	-0.81035	0	0	0	0	0	0	0	0	-0.83245	0	0	0	0	0	-0.85914	0	0	0	0	0	0	0	0	0	0	0	-0.80615	-0.85102	0	0	-0.81141	0	0	0
Q8TCS8	-0.92054	-0.90436	-0.8999	-0.90346	0	-0.82127	-0.84822	-0.8278	-0.81863	0	-0.81836	-0.8413	0	0	-0.81538	0	0	0	-0.8392	0	0	0	0	-0.87465	-0.82814	-0.82339	0	0	0	-0.91356	0	-0.80666	0	0	0	0	0	0	0	0	0	-0.90719	-0.89356	-0.81573	-0.85083	-0.85338	-0.83545	0	0
Q99873	-0.83408	-0.8105	-0.87744	-0.8256	-0.84443	-0.90464	-0.88424	-0.87379	-0.89879	-0.89031	-0.87671	-0.8053	0	-0.83624	-0.85283	-0.81808	0	0	0	0	-0.81421	0	0	-0.82457	0	0	0	0	0	0	0	0	0	0	0	0	0	0	0	0	0	0	0	0	0	0	0	0	0
P27708	0	0	-0.858	-0.82635	-0.81974	-0.92718	-0.8537	-0.84298	-0.86293	-0.83237	-0.83248	0	0	0	-0.83304	0	0	0	0	0	0	0	0	-0.80695	0	0	0	0	0	0	0	0	0	0	0	0	0	0	0	0	0	0	0	0	0	0	0	0	0
Q5JTH9	-0.82395	-0.80914	-0.86813	-0.85279	-0.85993	-0.88201	-0.8523	-0.83907	-0.88291	-0.82877	-0.84038	0	0	0	-0.8297	0	0	0	0	0	0	0	0	-0.85328	0	0	0	0	0	0	0	0	0	0	0	0	0	0	0	0	0	0	0	0	0	0	0	0	0
P16422	0	0	0	-0.81805	-0.83565	-0.91643	0	0	-0.80034	0	0	0	0	0	0	0	0	0	0	0	0	0	0	0	0	0	0	0	0	0	0	0	0	0	0	0	0	0	0	0	0	0	0	0	0	0	0	0	0
Q14764	0	0	-0.8277	-0.81798	-0.86286	-0.92307	-0.8308	-0.80735	-0.86978	-0.82686	-0.85621	0	0	0	0	0	0	0	0	0	0	0	0	0	0	0	0	0	0	0	0	0	0	0	0	0	0	0	0	0	0	0	0	0	0	0	0	0	0
P11908	-0.85691	-0.94448	-0.9028	-0.92472	-0.87429	-0.86662	-0.86748	-0.84283	-0.89318	-0.84713	-0.90266	-0.8122	-0.82799	-0.81196	-0.81093	0	0	0	0	0	0	0	0	-0.86448	-0.82062	-0.81443	-0.84239	0	0	0	-0.85681	0	0	-0.83743	0	0	-0.81395	0	0	0	0	-0.82685	-0.80562	0	-0.80867	-0.8346	-0.81738	0	0
P63220	-0.8518	-0.85768	-0.88518	-0.88459	-0.81389	-0.85627	-0.87447	-0.85143	-0.87164	-0.85036	-0.86568	0	0	0	0	-0.811	0	0	0	0	0	0	0	-0.8761	-0.81903	0	0	0	0	0	0	0	0	-0.86255	0	0	0	0	0	0	0	0	-0.80778	0	0	0	0	0	0
Q9H488	-0.8216	-0.86186	-0.86262	-0.85143	0	-0.86059	-0.84336	-0.8081	-0.83449	-0.80513	-0.83092	0	0	0	0	0	0	0	0	0	0	0	0	0	0	0	0	0	0	0	0	0	0	0	0	0	0	0	0	0	0	0	-0.82483	-0.82788	-0.83334	0	0	0	0
O00151	0	-0.83074	-0.83182	-0.90345	-0.89238	-0.92506	-0.86553	-0.83714	-0.90682	-0.83658	-0.87178	-0.83009	0	0	0	0	0	0	0	0	0	0	0	-0.8515	0	-0.8295	0	0	0	0	0	0	0	0	0	0	0	0	0	0	0	0	0	0	0	0	0	0	0
P14923	0	-0.80439	-0.81056	-0.86154	-0.87876	-0.93053	-0.85708	-0.84102	-0.88968	-0.83046	-0.85506	0	0	0	0	0	0	0	0	0	0	0	0	-0.80234	0	0	0	0	0	0	0	0	0	0	0	0	0	0	0	0	0	0	0	0	0	0	0	0	0
P51858	-0.84169	-0.84978	-0.87821	-0.88982	-0.83299	-0.91652	-0.85471	-0.83742	-0.86842	-0.82899	-0.84202	0	0	0	-0.81925	0	0	0	0	0	0	0	0	-0.82755	0	0	0	0	0	0	0	0	0	0	0	0	0	0	0	0	0	0	0	0	0	0	0	0	0
P18283	-0.8024	-0.8855	-0.89735	-0.83346	-0.81091	-0.89079	-0.80725	0	-0.82653	0	-0.82107	0	0	0	0	0	0	0	0	0	0	0	0	0	0	0	0	0	0	0	0	0	0	0	0	0	0	0	0	0	0	0	-0.80526	-0.80706	-0.84237	-0.83459	0	0	0
P99999	-0.84681	-0.9131	-0.9061	-0.88105	-0.8409	-0.87543	-0.823	-0.8014	-0.83687	-0.81468	-0.84053	0	0	0	-0.82314	0	0	0	0	0	0	0	0	-0.81528	0	-0.80004	0	0	0	0	-0.81612	0	0	-0.82297	0	0	0	0	0	0	0	0	0	0	0	-0.83742	0	0	0
Q5JTJ3	0	-0.86871	-0.82606	-0.88832	-0.8272	-0.88382	0	0	-0.84245	0	-0.82877	0	0	0	0	0	0	0	0	0	0	0	0	0	0	-0.82894	-0.80355	0	0	0	-0.85907	0	0	0	0	0	0	0	0	0	0	0	0	0	0	0	0	0	0
Q9NSE4	0	-0.86245	-0.86224	-0.86617	0	-0.88717	0	0	-0.80813	0	0	0	0	0	0	0	0	0	0	0	0	0	0	0	0	0	0	0	0	0	0	0	0	0	0	0	0	0	0	0	0	-0.80328	-0.84746	-0.8009	-0.832	0	0	0	0
P16401	0	0	-0.85522	0	-0.82538	-0.89844	-0.88882	-0.87837	-0.87392	-0.8963	-0.87808	-0.80689	-0.84762	-0.85751	-0.85123	-0.84032	-0.80753	0	0	0	0	0	0	0	0	0	0	0	0	0	0	0	0	0	0	0	0	0	0	0	0	0	0	0	0	0	0	0	0
Q6L8Q7	0	0	-0.84512	0	0	-0.89424	-0.86891	-0.86078	-0.85415	-0.86268	-0.84415	0	0	-0.80719	-0.82879	-0.84001	0	0	0	0	0	0	0	0	0	0	0	0	0	0	0	0	0	0	0	0	0	0	0	0	0	0	0	0	0	0	0	0	0
P68402	0	0	0	0	0	-0.92309	-0.83022	-0.80732	-0.81468	0	0	0	0	0	0	0	0	0	0	0	0	0	0	0	0	0	0	0	0	0	0	0	0	0	0	0	0	0	0	0	0	0	0	0	0	0	0	0	0
Q9BQE3	0	0	0	0	0	-0.89798	-0.83733	-0.82386	0	0	0	0	0	0	0	-0.82685	0	0	0	0	0	0	0	0	0	0	0	0	0	0	0	0	0	0	0	0	0	0	0	0	0	0	0	0	0	0	0	0	0
Q8IY67	-0.84462	0	-0.8267	-0.82132	0	-0.90447	-0.89474	-0.89451	-0.8883	-0.89093	-0.88801	0	-0.81963	-0.85422	-0.85193	-0.88893	-0.86134	0	0	0	0	0	0	0	0	0	-0.81374	0	0	0	0	0	0	0	0	0	0	0	0	0	0	0	0	0	0	0	0	0	0
P61289	-0.81682	-0.83552	-0.84876	-0.8146	0	-0.90778	-0.85816	-0.8299	-0.86443	-0.83844	-0.84606	0	-0.80066	0	0	-0.81705	0	0	0	0	0	0	0	0	0	0	0	0	0	0	0	0	0	0	0	0	0	0	0	0	0	0	0	0	0	0	0	0	0
P62826	0	0	0	-0.8124	-0.83269	-0.88983	-0.88261	-0.87289	-0.91184	-0.86084	-0.87186	0	0	0	0	-0.84013	-0.82813	-0.80327	0	0	0	0	0	0	0	0	0	0	0	0	0	0	0	0	0	0	0	0	0	0	0	0	0	0	0	0	0	0	0
Q14166	-0.83542	-0.8149	0	-0.89261	-0.80751	-0.90568	-0.85856	-0.8505	-0.87555	-0.82527	-0.85085	-0.84778	0	0	0	0	0	0	-0.83823	0	0	0	0	-0.80522	0	-0.80292	-0.81252	0	0	-0.85171	0	0	0	0	0	0	0	0	0	0	0	0	0	0	0	0	0	0	0
Q9HAV7	-0.84202	-0.83417	0	-0.90451	0	-0.89704	-0.83556	-0.82435	-0.83748	0	-0.81205	0	0	0	0	0	0	0	-0.82064	0	0	0	0	0	0	-0.80895	0	0	0	0	0	0	0	0	0	0	0	0	0	0	0	0	0	0	0	0	0	0	0
P31946	-0.81992	0	0	0	0	-0.83796	-0.84538	-0.84162	-0.81382	0	0	0	0	0	-0.8556	0	0	0	-0.82537	0	0	0	0	0	0	0	0	0	0	0	0	0	0	0	0	0	0	0	0	0	0	0	0	0	0	0	0	0	0
Q9H0D6	0	0	0	0	0	-0.818	-0.84467	-0.82056	0	0	0	0	0	0	0	0	0	0	-0.81189	0	0	0	0	0	0	0	0	0	0	0	0	0	0	0	0	0	0	0	0	0	0	0	0	0	0	0	0	0	0
P05455	-0.86807	0	-0.80391	-0.8328	0	-0.88327	-0.88126	-0.88073	-0.86366	-0.84794	-0.81593	0	0	0	-0.86314	-0.81688	0	0	-0.87786	0	0	0	0	0	0	0	0	0	0	0	0	0	0	0	0	0	0	0	0	0	0	0	0	0	0	0	0	0	0
P12956	-0.87339	-0.81933	-0.83653	-0.88757	-0.83268	-0.8911	-0.88262	-0.87296	-0.89917	-0.84961	-0.85079	0	0	0	-0.83103	-0.8128	0	0	-0.85502	0	0	0	0	-0.83838	0	0	0	0	0	0	0	0	0	0	0	0	0	0	0	0	0	0	0	0	0	0	0	0	0
P12235	-0.8132	-0.82514	0	-0.82154	-0.90365	-0.83659	-0.88763	-0.86505	-0.91672	-0.84582	-0.85986	0	0	0	0	-0.80768	0	-0.81669	-0.81968	0	0	0	0	-0.80947	-0.80231	0	0	0	0	0	0	0	0	0	0	0	0	0	0	0	0	0	0	0	0	0	0	0	0
P24666	-0.85165	-0.84815	-0.85852	-0.86733	-0.8695	-0.9064	-0.91132	-0.89373	-0.91973	-0.8687	-0.86736	-0.81579	0	0	-0.84967	-0.83379	0	0	-0.80723	0	0	0	0	-0.83966	0	0	0	0	0	0	0	0	0	0	0	0	0	0	0	0	0	0	0	0	0	0	0	0	0
Q9UQ80	-0.80845	-0.82159	-0.81711	-0.81939	-0.86315	-0.84867	-0.88948	-0.86833	-0.90035	-0.83977	-0.84046	0	0	0	-0.82217	-0.81585	0	0	0	0	0	0	0	-0.80421	0	0	0	0	0	0	0	0	0	0	0	0	0	0	0	0	0	0	0	0	0	0	0	0	0
Q07020	0	0	0	0	0	0	-0.85086	-0.83816	-0.86111	-0.81865	-0.83091	0	0	0	0	-0.82556	-0.86293	-0.8123	0	0	0	0	0	0	0	0	0	0	0	0	0	0	0	0	0	0	0	0	0	0	0	0	0	0	0	0	0	0	0
Q13724	0	0	0	-0.80978	0	-0.82167	-0.8054	0	-0.80877	0	0	0	0	0	0	0	0	0	0	0	0	0	0	0	0	0	0	0	0	0	0	0	0	0	0	0	0	0	0	0	0	0	0	0	0	0	0	0	0
P38646	0	0	0	0	0	-0.90491	0	0	0	0	0	0	0	0	0	0	0	0	0	0	0	0	0	0	0	0	-0.85585	0	0	0	0	0	0	0	0	0	0	0	0	0	0	0	0	0	0	0	0	0	0
Q99805	0	0	0	0	0	-0.89856	0	0	0	0	0	0	0	0	0	0	0	0	0	0	0	0	0	0	0	0	0	0	0	0	0	0	0	0	0	0	0	0	0	0	0	0	0	0	0	0	0	0	0
Q9Y6N5	0	0	0	0	0	-0.8741	0	0	0	-0.80318	-0.84173	0	-0.8549	-0.80341	0	0	0	0	0	0	0	0	0	0	0	0	0	0	0	0	0	0	0	0	0	0	0	0	0	0	0	0	0	0	0	0	0	0	0
Q9Y5B9	0	0	0	0	0	-0.81114	0	0	0	0	0	0	0	0	0	0	0	0	0	0	0	0	0	0	0	0	0	0	0	0	-0.8607	0	0	0	0	0	0	0	0	0	0	0	0	0	0	0	0	0	0
P61326	0	0	0	0	0	-0.81857	0	0	0	0	0	0	0	0	0	0	0	0	0	0	0	0	0	0	0	0	0	0	0	0	-0.85255	0	0	0	0	0	0	0	0	0	0	0	0	0	0	0	0	0	0
Q969Q0	0	0	0	0	0	0	0	0	0	0	0	0	0	0	0	0	0	0	0	0	0	0	0	0	0	0	0	0	0	0	-0.85635	0	0	0	0	0	0	0	0	0	0	0	0	0	0	0	0	0	0
Q96HS1	0	-0.85922	0	0	-0.81247	0	-0.82328	0	-0.81374	0	-0.81234	0	-0.8411	0	0	0	0	0	0	0	0	0	-0.80418	0	0	0	0	0	0	0	-0.87749	0	0	0	0	0	0	0	0	0	0	0	0	0	0	0	0	0	0
P51812	0	-0.82608	0	0	0	-0.82115	0	0	0	0	0	0	-0.80828	0	0	0	0	0	0	0	0	0	0	0	0	0	0	0	0	0	-0.82488	0	0	0	0	0	0	0	0	0	0	0	0	0	0	0	0	0	0
Q14651	0	-0.80586	0	0	-0.80921	-0.84603	0	0	0	0	0	0	-0.80555	0	0	0	0	0	0	0	0	0	0	0	0	0	0	0	0	0	0	0	0	0	0	0	0	0	0	0	0	0	0	0	0	0	0	0	0
O75494	0	0	0	0	0	-0.90883	-0.80318	-0.80451	0	0	0	0	-0.80158	0	0	0	0	0	0	0	0	0	0	0	0	0	0	0	0	0	0	0	0	0	0	0	0	0	0	0	0	0	0	0	0	0	0	0	0
Q9HD45	0	0	0	0	0	-0.90271	-0.81567	-0.82618	0	-0.83173	-0.81311	0	-0.82283	-0.80504	0	0	0	0	0	0	0	0	0	0	0	0	0	0	0	0	0	0	0	0	0	0	0	0	0	0	0	0	0	0	0	0	0	0	0
P06454	0	0	0	0	0	0	0	0	0	0	0	0	0	0	0	0	0	0	0	0	0	0	0	0	0	0	0	0	0	0	0	0	0	0	0	0	0	0	0	0	0	0	0	0	0	0	0	0	0
Q14157	0	0	0	0	0	-0.8258	0	0	0	0	0	0	0	0	0	0	0	0	0	0	0	0	0	0	0	0	0	0	0	0	0	0	0	0	0	0	0	0	0	0	0	0	0	0	0	0	0	0	0
P14174	-0.84203	0	-0.80545	0	0	-0.84185	-0.86357	-0.8537	0	-0.81445	0	0	0	0	-0.81122	-0.84097	0	0	0	0	0	0	0	0	0	0	0	0	0	0	0	0	0	0	0	0	0	0	0	0	0	0	0	-0.82133	0	0	0	0	0
P55265	0	0	0	0	0	-0.88457	-0.83754	-0.8362	0	0	0	0	0	0	-0.80194	0	0	0	0	0	0	0	0	0	0	0	0	0	0	0	0	0	0	0	0	0	0	0	0	0	0	0	0	0	0	0	0	0	0
Q14847	0	0	0	0	0	-0.873	0	0	0	0	0	0	0	0	0	0	0	0	0	0	0	0	0	0	0	0	-0.82508	0	0	0	0	0	0	0	0	0	0	0	0	0	0	0	0	0	0	0	0	0	0
P84090	0	0	0	0	0	-0.91677	-0.82139	0	0	0	0	0	0	0	0	0	0	0	0	0	0	0	0	0	0	0	0	0	0	0	0	0	0	0	0	0	0	0	0	0	0	0	0	-0.80173	-0.80954	0	0	0	0
Q15067	0	0	0	0	0	-0.8745	0	0	0	0	0	0	0	0	0	0	0	0	0	0	0	0	0	0	0	0	0	0	0	0	0	0	0	0	0	0	0	0	0	0	0	0	0	0	0	0	0	0	0
P23368	0	0	-0.80936	0	0	-0.83112	-0.8409	-0.83645	0	-0.8252	-0.8028	0	0	0	-0.81023	-0.85586	0	0	0	0	0	0	0	0	0	0	-0.86128	0	0	0	0	0	0	0	0	0	0	0	0	0	0	0	0	0	0	0	0	0	0
P30520	0	0	0	0	0	-0.82257	-0.81398	0	0	0	0	0	0	0	0	-0.83468	0	0	0	0	0	0	0	0	0	0	0	0	0	0	0	0	0	0	0	0	0	0	0	0	0	0	0	0	0	0	0	0	0
P12830	0	-0.83356	-0.8	0	-0.81994	-0.83567	-0.85806	-0.8413	-0.81529	-0.83784	-0.83441	-0.85534	-0.89033	-0.84057	0	0	0	0	0	0	0	0	0	0	0	0	0	0	0	0	0	0	0	0	0	0	0	0	0	0	0	0	0	0	0	0	0	0	0
P63173	0	0	0	0	0	-0.82939	-0.83752	-0.81519	-0.80023	0	0	0	-0.8056	0	0	0	0	0	0	0	0	0	0	0	0	0	0	0	0	0	0	0	0	0	0	0	0	0	0	0	0	0	0	0	0	0	0	0	0
Q9NZP8	0	0	0	0	0	-0.8401	-0.81421	0	0	0	0	0	0	0	0	0	0	0	0	0	0	0	0	0	0	0	0	0	0	0	0	0	0	0	0	0	0	0	0	0	0	0	0	0	0	0	0	0	0
P46087	0	0	0	0	0	-0.83356	-0.86003	-0.84343	-0.82535	-0.83154	-0.81952	0	-0.80488	-0.81231	0	-0.87597	-0.80957	0	0	0	0	0	0	0	0	0	0	0	0	0	0	0	0	0	0	0	0	0	0	0	0	0	0	0	0	0	0	0	0
P54709	0	0	0	0	-0.8246	-0.8898	-0.87929	-0.87667	-0.85804	-0.88214	-0.88212	-0.848	-0.90215	-0.87256	0	-0.84406	-0.8447	0	0	0	0	0	0	0	0	0	0	0	0	0	0	0	0	0	0	0	0	0	0	0	0	0	0	0	0	0	0	0	0
Q9NYL9	0	0	0	0	0	-0.87319	-0.85843	-0.85309	-0.81422	-0.85021	-0.84767	0	-0.88725	-0.85265	0	-0.86504	-0.85555	0	0	0	0	0	0	0	0	0	0	0	0	0	0	0	0	0	0	0	0	0	0	0	0	0	0	0	0	0	0	0	0
Q3LXA3	0	0	0	0	0	0	0	0	0	0	0	0	0	0	0	0	0	0	0	0	0	0	0	0	0	0	0	0	0	0	0	0	0	0	0	0	0	0	0	0	0	0	0	0	0	0	0	0	0
O15371	0	0	0	0	0	-0.85753	0	0	0	0	0	0	0	0	0	0	0	0	0	0	0	0	0	0	0	0	0	0	0	0	0	0	0	0	0	0	0	0	0	0	0	0	0	0	0	0	0	0	0
Q2TAY7	0	0	0	0	0	0	0	0	0	0	0	0	0	0	0	0	0	0	0	0	0	0	0	0	0	0	0	0	0	0	0	0	0	0	0	0	0	0	0	0	0	0	0	0	0	0	0	0	0
P54819	0	-0.81844	0	-0.83509	0	-0.86995	-0.82771	0	0	0	0	-0.81472	-0.83862	0	0	0	0	0	0	0	0	0	0	0	0	0	0	0	0	0	0	0	0	0	0	0	0	0	0	0	0	0	-0.84442	0	0	0	0	0	0
P50579	0	0	0	0	0	-0.80588	-0.82105	-0.81635	0	0	0	0	0	0	-0.80368	0	0	0	0	0	0	0	0	0	0	0	0	0	0	0	0	0	0	0	0	0	0	0	0	0	0	0	0	0	0	0	0	0	0
P52815	0	0	0	0	0	-0.84741	-0.83468	-0.81803	0	-0.80096	-0.80141	0	-0.86491	0	0	0	0	0	0	0	0	0	0	0	0	0	0	0	0	0	0	0	0	0	0	0	0	0	0	0	0	0	0	0	0	0	0	0	0
O14828	-0.84013	-0.82396	0	-0.83257	0	0	-0.86145	-0.87724	-0.83453	-0.89406	-0.89891	-0.85669	-0.92273	-0.93247	-0.8489	-0.84737	-0.85623	0	0	-0.84509	-0.833	-0.81829	-0.84494	0	0	0	0	0	-0.81299	-0.81355	0	0	0	0	-0.85934	-0.90898	-0.85328	-0.80853	0	0	-0.8418	0	0	0	0	0	0	0	0
Q8TEM1	-0.81835	-0.84567	0	-0.85179	0	0	-0.81851	-0.82672	0	-0.82976	-0.86614	-0.82016	-0.87095	-0.8553	-0.81664	-0.80447	0	0	0	0	0	0	0	0	0	0	-0.87107	0	-0.83849	-0.85255	0	0	0	0	-0.81706	-0.8419	-0.85151	0	0	0	-0.86266	0	0	0	0	0	0	0	0
P19838	-0.81669	0	0	0	0	0	-0.83904	-0.8397	0	-0.80346	0	0	0	-0.80499	0	-0.85915	-0.81923	-0.83263	-0.84827	0	0	0	0	0	0	0	0	0	0	0	0	0	0	0	0	0	0	0	0	0	0	0	0	0	0	0	0	0	0
P13164	0	0	0	0	0	0	0	0	0	0	0	0	0	0	0	-0.80012	0	0	0	0	0	0	0	0	0	0	0	0	0	0	0	0	0	0	0	0	0	0	0	0	0	0	0	0	0	0	0	0	0
P52434	-0.80083	0	0	0	0	0	-0.80488	-0.81179	0	0	0	0	0	0	0	-0.83567	-0.81628	0	0	0	0	0	0	0	0	0	-0.82403	0	0	0	0	0	0	0	0	0	0	0	0	0	0	0	0	0	0	0	0	0	0
P43304	0	0	0	0	0	0	0	0	0	0	0	0	-0.80895	0	0	0	0	0	0	0	0	0	0	0	0	0	0	0	0	0	0	0	0	0	0	0	0	0	0	0	0	0	0	0	0	0	0	0	0
Q9BWD1	0	0	0	0	0	0	0	0	0	0	0	0	0	0	0	0	0	0	0	0	0	0	0	0	0	0	0	0	0	0	0	0	0	0	0	0	0	0	0	0	0	0	0	0	0	0	0	0	0
Q9Y315	0	0	0	0	0	0	0	0	0	0	0	0	0	0	0	0	0	0	0	0	0	0	0	0	0	0	0	0	0	0	0	0	0	0	0	0	0	0	0	0	0	0	0	0	0	0	0	0	0
P40121	0	0	0	0	0	-0.8213	0	-0.80125	0	0	-0.8092	0	-0.82653	0	0	0	0	0	0	0	0	0	0	0	0	0	-0.85702	0	0	0	0	0	0	0	0	0	0	0	0	0	0	0	0	0	0	0	0	0	0
Q9BWJ5	0	0	0	0	0	0	-0.80169	0	0	0	0	0	-0.81935	0	0	0	0	0	0	0	0	0	0	0	0	0	0	0	0	0	0	0	0	0	0	0	0	0	0	0	0	0	0	0	0	0	0	0	0
O60610	0	0	0	0	0	0	0	0	0	0	0	0	0	0	0	0	0	0	0	0	0	0	0	0	0	0	0	0	0	0	0	0	0	0	0	0	0	0	0	0	0	0	0	0	0	0	0	0	0
Q9Y2X3	0	0	0	0	0	0	0	0	0	0	0	0	0	0	0	0	0	0	0	0	0	0	0	0	0	0	0	0	0	0	0	0	0	0	0	0	0	0	0	0	0	0	0	0	0	0	0	0	0
P55212	0	0	0	-0.80461	0	-0.81262	-0.81569	0	0	0	0	0	-0.80716	0	0	-0.80694	0	0	0	0	0	0	0	0	0	0	-0.81317	0	0	0	0	0	0	0	0	0	0	0	0	0	0	0	0	0	0	0	0	0	0
P57088	0	0	0	0	0	-0.83221	-0.80387	0	0	0	0	0	0	0	0	-0.82184	-0.80977	0	0	0	0	0	0	0	0	0	0	0	0	0	0	0	0	0	0	0	0	0	0	0	0	0	0	0	0	0	0	0	0
Q10567	0	0	0	0	0	-0.81385	-0.80769	0	0	0	-0.81436	0	0	0	0	-0.80179	0	0	0	0	0	0	0	0	0	0	-0.82516	0	0	0	-0.80527	0	0	0	0	0	0	0	0	0	0	0	0	0	0	0	0	0	0
O43760	0	0	0	0	0	-0.82275	-0.81339	-0.81844	0	-0.82126	-0.82957	0	-0.84462	-0.82216	0	0	-0.82431	0	0	0	0	0	0	0	0	0	0	0	0	0	0	0	0	0	0	0	0	0	0	0	0	0	0	0	0	0	0	0	0
O14908	0	-0.80939	0	0	0	0	-0.82015	-0.80583	0	-0.80752	-0.82037	0	-0.87809	-0.80801	0	0	0	0	0	0	0	0	0	0	0	0	0	0	0	0	0	0	0	0	0	0	0	0	0	0	0	0	0	0	0	0	0	0	0
Q9HAT2	0	-0.81097	0	-0.83577	0	-0.8126	-0.81267	-0.80112	0	-0.80504	-0.83858	-0.80648	-0.88402	-0.81637	0	0	0	0	0	0	0	0	0	0	0	0	0	0	-0.83082	0	0	0	0	0	0	0	-0.8198	0	0	0	0	0	0	0	0	0	0	0	0
O95154	0	0	0	0	0	0	0	0	0	0	0	0	0	0	0	0	0	0	0	0	0	0	0	0	0	0	0	0	0	0	0	0	0	0	0	0	0	0	0	0	0	0	0	0	0	0	0	0	0
P06132	0	0	0	0	0	0	0	0	0	0	0	0	0	0	0	0	0	0	0	0	0	0	0	0	0	0	0	0	0	0	0	0	0	0	0	0	0	0	0	0	0	0	0	0	0	0	0	0	0
Q14699	0	0	0	0	0	0	0	0	0	0	0	0	0	0	0	0	0	0	0	0	0	0	0	0	0	0	0	0	0	0	0	0	0	0	0	0	0	0	0	0	0	0	0	0	0	0	0	0	0
P04440	0	0	0	0	0	0	-0.80467	-0.80471	0	0	0	0	0	0	0	-0.85064	-0.82161	0	0	0	0	0	0	0	0	0	0	0	0	0	0	0	0	0	0	0	0	0	0	0	0	0	0	0	0	0	0	0	0
A5YKK6	0	0	0	0	0	0	0	0	0	0	0	0	0	0	0	0	0	0	0	0	0	0	0	0	0	0	0	0	0	0	0	0	0	0	0	0	0	0	0	0	0	0	0	0	0	0	0	0	0
O60256	0	0	0	0	0	0	0	0	0	0	0	0	0	0	0	0	0	0	0	0	0	0	0	0	0	0	0	0	0	0	0	0	0	0	0	0	0	0	0	0	0	0	0	0	0	0	0	0	0
Q8NE86	-0.86464	0	0	-0.88463	0	0	-0.85411	-0.86616	-0.80991	-0.81506	-0.81045	-0.84821	0	0	-0.8384	-0.83902	0	0	-0.80625	-0.80836	0	0	0	-0.81796	0	-0.81447	-0.83834	-0.87416	-0.81056	-0.82271	0	-0.83093	0	0	0	0	0	0	0	0	0	0	0	0	0	0	0	0	0
Q8IWX8	-0.84989	0	0	-0.82324	0	0	-0.8217	-0.84105	0	0	0	0	0	0	-0.84321	-0.80894	0	0	-0.81061	0	0	0	0	0	0	0	0	0	0	0	0	0	0	0	0	0	0	0	0	0	0	0	0	0	0	0	0	0	0
Q9UHK6	-0.80684	0	0	-0.83051	0	0	-0.81314	-0.8369	0	0	0	-0.80803	0	0	0	0	0	0	-0.86928	0	0	0	0	0	0	0	0	0	0	0	0	0	0	0	0	0	0	0	0	0	0	0	0	0	0	0	0	0	0
P35611	0	0	0	0	0	0	0	0	0	0	0	0	0	0	0	0	0	0	0	0	0	0	0	0	0	0	0	0	0	0	0	0	0	0	0	0	0	0	0	0	0	0	0	0	0	0	0	0	0
Q6PI48	0	0	0	-0.82203	0	0	0	0	0	0	0	0	0	0	0	0	0	0	0	0	0	0	0	0	0	0	-0.80418	-0.81086	0	0	0	0	0	0	0	0	0	0	0	0	0	0	0	0	0	0	0	0	0
O95433	0	0	0	0	0	0	0	0	0	0	0	0	0	0	0	0	0	0	0	0	0	0	0	0	0	0	0	0	0	0	0	0	0	0	0	0	0	0	0	0	0	0	0	0	0	0	0	0	0
Q13148	0	0	0	0	0	0	-0.81773	-0.83508	0	0	0	0	0	0	0	-0.80037	0	0	0	0	0	0	0	0	0	0	0	0	0	0	0	0	0	0	0	0	0	0	0	0	0	0	0	0	0	0	0	0	0
Q13263	0	0	0	0	0	0	0	0	0	0	0	0	0	0	0	0	0	0	0	0	0	0	0	0	0	0	0	0	0	0	0	0	0	0	0	0	0	0	0	0	0	0	0	0	0	0	0	0	0
Q9H993	0	0	0	0	0	0	0	0	0	0	0	0	0	0	0	0	0	0	0	0	0	0	0	0	0	0	0	0	0	0	0	0	0	0	0	0	0	0	0	0	0	0	0	0	0	0	0	0	0
P18077	0	0	0	0	0	0	0	0	0	0	0	0	0	0	0	0	0	0	0	0	0	0	0	0	0	0	-0.81575	0	0	0	0	0	0	0	0	0	0	0	0	0	0	0	0	0	0	0	0	0	0
P57721	0	0	0	-0.8212	0	-0.80281	-0.821	-0.82414	0	-0.80354	-0.81847	0	0	0	0	-0.80657	-0.80547	0	0	0	0	0	0	0	0	0	0	0	0	0	0	0	0	0	0	0	0	0	0	0	0	0	0	0	0	0	0	0	0
P49321	0	0	0	-0.84755	0	0	-0.83634	-0.84139	-0.80776	-0.80005	-0.81744	0	0	0	0	-0.82058	-0.82569	-0.81713	0	-0.81461	0	0	0	0	0	0	-0.80167	0	0	0	0	0	0	0	0	0	0	0	0	0	0	0	0	0	0	0	0	0	0
Q9Y5S9	0	0	0	0	0	0	0	0	0	0	0	0	0	0	0	0	0	0	0	0	0	0	0	0	0	0	0	0	0	0	0	0	0	0	0	0	0	0	0	0	0	0	0	0	0	0	0	0	0
Q9BT22	0	0	0	-0.86911	0	-0.829	0	0	0	0	0	0	0	0	0	0	0	0	0	0	0	0	0	0	0	-0.80083	-0.80632	0	0	0	0	0	0	0	0	0	0	0	0	0	0	0	0	0	0	0	0	0	0
Q9P0J1	0	0	0	0	0	0	0	0	0	0	0	0	0	0	0	0	0	0	0	0	0	0	0	0	0	0	0	0	0	0	0	0	0	0	0	0	0	0	0	0	0	0	0	0	0	0	0	0	0
Q92783	0	0	0	0	0	0	0	0	0	0	0	0	0	0	0	0	0	0	0	0	0	0	0	0	0	0	0	-0.81324	0	0	0	0	0	0	0	0	0	0	0	0	0	0	0	0	0	0	0	0	0
Q92616	0	0	0	-0.80705	0	0	0	0	0	0	0	0	0	0	0	0	0	0	0	0	0	0	0	0	0	0	0	-0.82272	0	0	0	0	0	0	0	0	0	0	0	0	0	0	0	0	0	0	0	0	0
Q9Y512	0	0	0	-0.83529	0	0	0	0	0	0	0	0	0	0	0	0	0	0	0	0	0	0	0	0	0	-0.84066	0	-0.81485	0	0	-0.80474	0	0	0	0	0	0	0	0	0	0	0	0	0	0	0	0	0	0
P13798	-0.81644	-0.81632	0	-0.86598	0	0	-0.83043	-0.82689	0	-0.82776	-0.83958	-0.81162	-0.83698	-0.82705	0	-0.82079	0	0	0	0	0	0	-0.81596	0	0	-0.83887	-0.82826	0	-0.81987	-0.87272	0	0	0	0	0	0	0	0	0	0	0	0	0	0	0	0	0	0	0
Q9UBX3	0	-0.83509	0	-0.85937	-0.81687	0	-0.83366	-0.83357	-0.81682	-0.8159	-0.85377	-0.84715	-0.86431	-0.83617	0	0	0	0	0	-0.88678	0	0	0	0	-0.85234	-0.82331	0	0	0	0	-0.81914	0	-0.80393	0	-0.82485	-0.84886	-0.87858	0	0	0	-0.81242	0	0	0	0	0	0	0	0
P51970	0	0	0	-0.845	0	0	0	0	0	0	0	0	0	0	0	0	0	0	-0.8432	-0.81312	0	0	-0.81458	0	0	-0.844	0	0	0	0	0	0	0	0	0	0	0	0	0	0	0	0	0	0	0	0	0	0	0
Q96SQ9	-0.86387	-0.87427	0	-0.91532	0	0	-0.83477	-0.83851	-0.82218	-0.80809	-0.83689	-0.83907	0	-0.80108	-0.82924	0	0	0	-0.83613	-0.87492	0	0	0	-0.80796	-0.83495	-0.86745	-0.86562	-0.8753	-0.80803	-0.81287	-0.83878	0	-0.80725	0	0	0	-0.81618	0	0	0	-0.84344	0	0	0	0	0	0	0	0
Q13505	0	0	0	-0.84178	0	0	-0.82113	-0.83113	-0.81146	0	0	0	0	0	0	0	0	-0.81359	-0.84859	-0.82531	0	0	0	0	0	-0.81238	-0.81031	-0.85234	0	0	-0.80408	0	0	0	0	0	0	0	0	0	0	0	0	0	0	0	0	0	0
Q9UKV3	0	0	0	-0.87618	0	0	-0.84289	-0.85632	-0.83966	-0.81921	-0.83403	-0.83079	0	-0.80844	-0.80938	-0.80709	0	0	-0.82586	-0.86677	0	0	0	0	0	-0.83018	-0.86471	-0.87696	0	0	-0.82981	0	-0.80362	0	0	0	0	0	0	0	0	0	0	0	0	0	0	0	0
Q9NYF8	0	0	0	0	0	0	-0.8178	-0.82905	0	0	0	0	-0.8127	0	0	-0.81618	0	0	0	0	0	0	0	0	0	0	0	0	0	0	0	0	0	0	0	0	0	0	0	0	0	0	0	0	0	0	0	0	0
P04439	0	0	0	0	0	0	-0.82842	-0.83701	0	-0.82073	-0.80017	0	-0.88347	-0.84156	0	-0.81843	-0.83644	0	0	0	0	0	0	0	0	0	0	0	0	0	0	0	0	0	0	0	0	0	0	0	0	0	0	0	0	0	0	0	0
Q96FW1	0	0	0	0	0	0	-0.84522	-0.84624	0	-0.81805	0	0	-0.86187	-0.8243	0	-0.8491	-0.82794	0	0	0	0	0	0	0	0	0	0	0	0	0	0	0	0	0	0	0	0	0	0	0	0	0	0	0	0	0	0	0	0
Q9NSD9	0	0	0	0	0	0	0	0	0	0	0	0	0	0	0	0	0	0	0	0	0	0	0	0	0	0	0	0	0	0	0	0	0	0	0	0	0	0	0	0	0	0	0	0	0	0	0	0	0
P52789	0	0	0	-0.81163	0	0	-0.81876	-0.82751	0	0	0	-0.84518	0	0	0	0	0	0	0	-0.8224	0	0	0	0	0	-0.80385	0	-0.83556	0	0	0	0	0	0	0	0	0	0	0	0	0	0	0	0	0	0	0	0	0
Q13347	0	0	0	0	0	0	-0.81295	-0.8184	0	0	0	-0.80747	0	0	0	0	0	0	0	0	0	0	0	0	0	0	0	0	0	0	0	0	0	0	0	0	0	0	0	0	0	0	0	0	0	0	0	0	0
P00390	0	-0.84424	0	-0.83472	0	0	0	0	0	0	0	0	-0.8273	0	0	0	0	0	0	0	0	0	0	0	0	-0.81426	-0.80905	0	0	0	0	0	0	0	0	0	0	0	0	0	0	0	0	0	0	0	0	0	0
Q96A26	0	0	0	0	0	0	0	0	0	0	0	0	0	0	0	0	0	0	0	0	0	0	0	0	0	0	0	0	0	0	0	0	0	0	0	0	0	0	0	0	0	0	0	0	0	0	0	0	0
Q00535	0	0	0	0	0	-0.80731	0	0	0	0	0	0	0	0	0	0	0	0	0	0	0	0	0	0	0	0	-0.8035	0	0	0	0	0	0	0	0	0	0	0	0	0	0	0	0	0	0	0	0	0	0
Q6IBS0	0	0	0	0	0	-0.82514	0	-0.81173	0	0	0	0	-0.80736	0	0	0	0	0	0	0	0	0	0	0	0	0	-0.83296	0	0	0	0	0	0	0	0	0	0	0	0	0	0	0	0	0	0	0	0	0	0
O75348	0	0	0	0	0	0	-0.82541	-0.82094	0	0	0	0	-0.81892	0	0	-0.85145	-0.81897	0	0	0	0	0	0	0	0	0	0	0	0	0	0	0	0	0	0	0	0	0	0	0	0	0	0	0	0	0	0	0	0
P49720	0	0	0	0	0	0	0	0	0	0	0	0	0	0	-0.80374	0	0	0	0	0	0	0	0	0	0	0	-0.83653	0	0	0	0	0	0	0	0	0	0	0	0	0	0	0	0	0	0	0	0	0	0
O95336	0	0	0	0	0	0	0	0	0	0	0	0	0	0	0	0	0	0	0	0	0	0	0	0	0	0	0	0	0	0	0	0	0	0	0	0	0	0	0	0	0	0	0	0	0	0	0	0	0
Q1KMD3	0	0	0	0	0	0	0	0	0	0	0	0	0	0	0	0	0	0	0	0	0	0	0	0	0	0	0	0	0	0	0	0	0	0	0	0	0	0	0	0	0	0	0	0	0	0	0	0	0
P46781	0	0	0	0	0	0	0	0	0	0	0	0	0	0	0	0	0	0	0	0	0	0	0	0	0	0	0	0	0	0	0	0	0	0	0	0	0	0	0	0	0	0	0	0	0	0	0	0	0
Q99471	0	0	0	0	0	0	0	0	0	0	0	0	0	0	0	0	0	0	0	0	0	0	0	0	0	0	0	0	0	0	0	0	0	0	0	0	0	0	0	0	0	0	0	0	0	0	0	0	0
Q15370	0	0	0	0	0	-0.81393	-0.82895	-0.83221	0	0	0	0	-0.81505	0	0	0	0	0	0	0	0	0	0	0	0	0	0	0	0	0	0	0	0	0	0	0	0	0	0	0	0	0	0	0	0	0	0	0	0
Q96KP4	0	0	0	0	0	0	0	-0.80542	0	0	0	0	0	0	0	0	0	0	0	0	0	0	0	0	0	0	0	0	0	0	0	0	0	0	0	0	0	0	0	0	0	0	0	0	0	0	0	0	0
Q99729	0	0	0	0	0	-0.81569	-0.88725	-0.89247	0	-0.85586	-0.81922	-0.84266	-0.86244	-0.84403	-0.81284	-0.89375	-0.86187	0	0	0	0	0	0	0	0	0	0	0	0	0	0	0	0	0	0	0	0	0	0	0	0	0	0	0	0	0	0	0	0
Q9UN86	0	0	0	0	0	-0.81	-0.88562	-0.89002	-0.81069	-0.84998	-0.8088	-0.84166	-0.8367	-0.83151	0	-0.88821	-0.84874	0	0	0	0	0	0	0	0	0	0	0	0	0	0	0	0	0	0	0	0	0	0	0	0	0	0	0	0	0	0	0	0
P49458	0	0	0	-0.80724	0	-0.80767	-0.88355	-0.88168	-0.80346	-0.84213	-0.82464	-0.83007	-0.86827	-0.83514	0	-0.87704	-0.85182	0	0	0	0	0	0	0	0	0	0	0	0	0	0	0	0	0	0	0	0	0	0	0	0	0	0	0	0	0	0	0	0
Q15393	0	0	0	0	0	0	-0.85053	-0.85668	0	-0.80793	0	-0.80703	-0.81728	0	-0.81529	-0.837	0	0	0	0	0	0	0	0	0	0	0	0	0	0	0	0	0	0	0	0	0	0	0	0	0	0	0	0	0	0	0	0	0
P62333	0	0	0	0	0	0	0	0	0	0	0	0	0	0	0	0	0	0	0	0	0	0	0	0	0	0	0	0	0	0	0	0	0	0	0	0	0	0	0	0	0	0	0	0	0	0	0	0	0
P60228	0	0	0	0	0	0	-0.82887	-0.82625	0	0	0	0	0	0	0	-0.82984	0	0	0	0	0	0	0	0	0	0	0	0	0	0	0	0	0	0	0	0	0	0	0	0	0	0	0	0	0	0	0	0	0
Q9Y2W1	0	0	0	0	0	0	-0.82396	-0.82587	0	0	0	0	-0.80619	0	0	-0.83414	-0.80577	0	0	0	0	0	0	0	0	0	0	0	0	0	0	0	0	0	0	0	0	0	0	0	0	0	0	0	0	0	0	0	0
Q14376	0	0	0	-0.81443	0	0	0	0	0	0	0	0	0	0	0	0	0	0	0	0	0	0	0	0	0	0	0	0	0	0	0	0	0	0	0	0	0	0	0	0	0	0	0	0	0	0	0	0	0
P26640	0	0	0	0	0	0	-0.82148	-0.82454	0	0	0	0	0	0	0	-0.82958	0	0	0	0	0	0	0	0	0	0	0	0	0	0	0	0	0	0	0	0	0	0	0	0	0	0	0	0	0	0	0	0	0
Q16531	0	0	0	0	0	0	-0.83758	-0.85121	0	0	0	0	0	0	0	-0.84615	-0.8305	0	0	0	0	0	0	0	0	0	0	0	0	0	0	0	0	0	0	0	0	0	0	0	0	0	0	0	0	0	0	0	0
O75475	-0.80292	-0.81907	0	-0.84663	0	0	-0.85929	-0.85042	0	0	0	0	0	0	-0.80546	-0.82809	0	0	0	0	0	0	0	0	0	-0.80848	0	-0.80457	0	0	0	0	0	0	0	0	0	0	0	0	0	0	0	0	0	0	0	0	0
P07954	0	-0.8021	0	-0.83437	0	0	0	0	0	0	0	0	0	0	0	0	0	0	0	-0.80182	0	0	0	0	0	-0.81649	0	-0.82181	0	0	0	0	0	0	0	0	0	0	0	0	0	0	0	0	0	0	0	0	0
P53992	0	0	0	-0.80253	0	0	-0.81444	-0.82222	0	0	0	0	0	0	0	0	0	0	0	0	0	0	0	0	0	0	0	0	0	0	0	0	0	0	0	0	0	0	0	0	0	0	0	0	0	0	0	0	0
P62829	0	0	0	-0.83396	0	-0.81515	-0.86854	-0.86934	-0.82633	-0.82251	-0.81975	-0.80449	-0.80452	0	0	-0.83896	-0.81799	0	0	0	0	0	0	0	0	0	0	0	0	0	0	0	0	0	0	0	0	0	0	0	0	0	0	0	0	0	0	0	0
Q9Y6E0	0	0	0	-0.81991	0	0	-0.83708	-0.84131	0	0	0	0	-0.81672	0	-0.80701	-0.81306	0	0	-0.80077	0	0	0	0	0	0	0	0	0	0	0	0	0	0	0	0	0	0	0	0	0	0	0	0	0	0	0	0	0	0
Q9Y383	0	0	0	0	0	0	-0.84956	-0.86036	0	-0.80034	0	0	0	0	-0.81752	-0.84058	-0.81261	0	0	0	0	0	0	0	0	0	0	0	0	0	0	0	0	0	0	0	0	0	0	0	0	0	0	0	0	0	0	0	0
P17987	0	0	0	-0.81397	0	0	-0.87948	-0.89423	-0.81848	-0.85077	-0.83979	-0.82679	-0.83101	-0.83682	-0.83156	-0.88813	-0.87967	0	0	0	0	0	0	0	0	0	-0.82107	0	0	0	0	0	0	0	0	0	0	0	0	0	0	0	0	0	0	0	0	0	0
P38159	0	0	0	-0.82091	0	0	-0.8579	-0.86666	-0.80073	-0.82138	-0.81022	0	0	-0.80498	-0.82879	-0.85075	-0.82345	0	-0.80814	0	0	0	0	0	0	0	0	0	0	0	0	0	0	0	0	0	0	0	0	0	0	0	0	0	0	0	0	0	0
Q99613	0	0	0	-0.80719	0	0	-0.86162	-0.86605	0	-0.81294	0	0	0	0	0	-0.85885	-0.83126	0	0	0	0	0	0	0	0	0	0	0	0	0	0	0	0	0	0	0	0	0	0	0	0	0	0	0	0	0	0	0	0
P49368	-0.86433	-0.80466	0	-0.87164	-0.8121	0	-0.92312	-0.93316	-0.87726	-0.88717	-0.87211	-0.90167	-0.84727	-0.86637	-0.865	-0.90206	-0.88438	-0.87633	-0.87371	-0.86613	-0.82242	0	0	-0.82287	-0.85097	-0.81727	0	-0.82178	0	0	0	-0.8486	-0.83479	0	0	0	0	0	0	0	0	0	0	0	0	0	0	0	0
Q99733	-0.82246	0	0	-0.82148	0	0	-0.8654	-0.87728	-0.80868	-0.82299	0	-0.82654	0	0	-0.8411	-0.81914	-0.80602	-0.8635	-0.88422	-0.83917	0	0	0	0	-0.85069	0	0	-0.8245	0	0	0	0	-0.84568	0	0	0	0	0	0	0	0	0	0	0	0	0	0	0	0
P45880	0	0	0	0	0	0	-0.90774	-0.92927	-0.8432	-0.89591	-0.84411	-0.8664	-0.8407	-0.87861	-0.86962	-0.90422	-0.89117	-0.8213	-0.83561	-0.82225	-0.85207	-0.8107	-0.8515	0	0	0	0	0	0	0	0	0	-0.80956	0	0	0	0	0	-0.80679	0	0	0	0	0	0	0	0	0	0
P31947	0	0	0	0	0	0	-0.83835	-0.85599	0	0	0	0	0	0	-0.87291	-0.82626	0	0	0	0	0	0	0	0	0	0	0	0	0	0	0	0	0	0	0	0	0	0	0	0	0	0	0	0	0	0	0	0	0
P62191	0	0	0	0	0	0	-0.87692	-0.88698	0	-0.83955	0	0	0	0	-0.85347	-0.89382	-0.84028	0	0	0	0	0	0	0	0	0	0	0	0	0	0	0	0	0	0	0	0	0	0	0	0	0	0	0	0	0	0	0	0
Q7Z4W1	0	0	0	0	0	0	-0.83023	-0.84755	0	-0.80049	0	-0.8131	0	-0.80056	-0.8036	-0.80175	-0.80447	0	0	-0.81004	0	0	0	0	0	0	0	0	0	0	0	0	0	0	0	0	0	0	0	0	0	0	0	0	0	0	0	0	0
P52272	0	0	0	0	0	0	-0.85326	-0.87765	0	-0.83594	-0.80371	-0.82265	-0.816	-0.83652	-0.83784	-0.85232	-0.84198	0	0	-0.8052	0	0	0	0	0	0	0	0	0	0	0	0	0	0	0	0	0	0	0	0	0	0	0	0	0	0	0	0	0
P60900	0	0	0	0	0	0	-0.83818	-0.85088	0	0	0	0	-0.80104	0	0	-0.84235	-0.83	0	0	0	0	0	0	0	0	0	0	0	0	0	0	0	0	0	0	0	0	0	0	0	0	0	0	0	0	0	0	0	0
P42765	0	0	0	0	0	0	0	0	0	0	0	0	0	0	0	0	0	0	0	0	0	0	0	0	0	0	0	0	0	0	0	0	0	0	0	0	0	0	0	0	0	0	0	0	0	0	0	0	0
P54886	0	0	0	0	0	0	-0.84949	-0.85117	0	0	0	-0.83562	-0.81953	0	0	-0.84802	-0.81726	0	0	0	0	0	0	0	0	0	0	0	0	0	0	0	0	0	0	0	0	0	0	0	0	0	0	0	0	0	0	0	0
Q9NZL9	0	0	0	0	0	0	-0.8002	-0.81098	0	0	0	0	0	0	-0.80121	0	0	0	0	0	0	0	0	0	0	0	0	0	0	0	0	0	0	0	0	0	0	0	0	0	0	0	0	0	0	0	0	0	0
O43491	0	0	0	0	0	0	0	0	0	0	0	0	0	0	0	0	0	0	0	0	0	0	0	0	0	0	0	-0.85095	0	0	0	0	0	0	0	0	0	0	0	0	0	0	0	0	0	0	0	0	0
O43837	0	0	0	0	0	0	0	0	0	0	0	0	0	0	0	0	0	0	0	0	0	0	0	0	0	0	0	-0.81853	0	0	0	0	0	0	0	0	0	0	0	0	0	0	0	0	0	0	0	0	0
Q13363	0	0	0	0	0	0	0	0	0	0	0	0	0	0	0	0	0	0	0	0	0	0	0	0	0	0	0	0	0	0	0	0	0	0	0	0	0	0	0	0	0	0	0	0	0	0	0	0	0
Q13501	0	0	0	0	0	0	0	0	0	0	0	0	0	0	0	0	0	0	0	0	0	0	0	0	0	0	0	0	0	0	0	0	0	0	0	0	0	0	0	0	0	0	0	0	0	0	0	0	0
O75822	0	0	0	0	0	0	0	0	0	0	0	0	0	0	0	0	0	0	0	0	0	0	0	0	0	0	0	0	0	0	0	0	0	0	0	0	0	0	0	0	0	0	0	0	0	0	0	0	0
Q9H3K2	0	0	0	0	0	0	-0.80783	-0.80301	0	0	0	0	0	0	0	-0.81403	0	0	0	0	0	0	0	0	0	0	-0.80428	0	0	0	0	0	0	0	0	0	0	0	0	0	0	0	0	0	0	0	0	0	0
P09661	0	0	0	-0.82032	0	0	-0.84401	-0.84281	0	-0.80585	-0.81809	0	-0.81844	0	0	-0.84153	-0.82474	0	0	0	0	0	0	0	0	0	0	0	0	0	0	0	0	0	0	0	0	0	0	0	0	0	0	0	0	0	0	0	0
P31942	0	0	0	0	0	0	-0.829	-0.83018	0	0	0	0	0	0	0	-0.84234	-0.82735	0	0	0	0	0	0	0	0	0	0	0	0	0	0	0	0	0	0	0	0	0	0	0	0	0	0	0	0	0	0	0	0
Q13435	0	0	0	0	0	0	-0.8139	-0.82115	0	0	0	0	0	0	0	-0.83866	0	0	0	0	0	0	0	0	0	0	0	0	0	0	0	0	0	0	0	0	0	0	0	0	0	0	0	0	0	0	0	0	0
Q14444	0	0	0	0	0	0	-0.84568	-0.85818	0	-0.80757	0	0	0	0	0	-0.87331	-0.87293	0	0	0	0	0	0	0	0	0	0	0	0	0	0	0	0	0	0	0	0	0	0	0	0	0	0	0	0	0	0	0	0
Q9NX63	0	0	0	0	0	0	-0.80919	-0.82739	0	0	0	0	0	0	-0.80392	-0.82777	-0.81584	0	0	0	0	0	0	0	0	0	0	0	0	0	0	0	0	0	0	0	0	0	0	0	0	0	0	0	0	0	0	0	0
Q6XQN6	0	0	0	0	0	0	0	0	0	0	0	0	0	0	0	0	0	0	0	0	0	0	0	0	0	0	0	0	0	0	0	0	0	0	0	0	0	0	0	0	0	0	0	0	0	0	0	0	0
O95169	0	0	0	0	0	0	0	0	0	0	0	0	0	0	0	0	0	0	0	-0.80973	0	0	0	0	0	0	0	0	0	0	-0.80466	0	0	0	0	0	0	0	0	0	-0.80005	0	0	0	0	0	0	0	0
Q96CW1	0	0	0	0	0	0	0	0	0	0	0	0	0	0	0	-0.80363	0	0	0	0	0	0	0	0	0	0	-0.82787	0	0	0	0	0	0	0	0	0	0	0	0	0	0	0	0	0	0	0	0	0	0
Q9BZK7	0	0	0	0	0	0	0	0	0	0	0	0	0	0	0	0	0	0	0	0	0	0	0	0	0	0	0	-0.83627	0	0	0	0	0	0	0	0	0	0	0	0	0	0	0	0	0	0	0	0	0
P52758	0	0	0	-0.80488	0	0	-0.81332	-0.8076	0	0	0	0	0	0	0	0	0	-0.84812	0	0	0	0	0	0	0	0	0	-0.82001	0	0	0	0	0	0	0	0	0	0	0	0	0	0	0	0	0	0	0	0	0
Q96EY7	0	0	0	0	0	0	0	0	0	0	0	0	0	0	0	0	0	0	-0.83863	0	0	0	0	0	0	0	0	0	0	0	0	0	0	0	0	0	0	0	0	0	0	0	0	0	0	0	0	0	0
P30566	0	0	0	-0.817	0	0	0	0	0	0	0	0	0	0	0	0	0	0	0	-0.80917	0	0	0	0	0	0	0	-0.86445	0	0	0	0	0	0	0	0	0	0	0	0	0	0	0	0	0	0	0	0	0
Q15631	0	0	0	0	0	0	-0.81987	-0.83371	0	0	0	0	0	0	0	-0.84078	-0.82281	-0.8404	0	0	0	0	0	0	0	0	0	0	0	0	0	0	0	0	0	0	0	0	0	0	0	0	0	0	0	0	0	0	0
P49591	0	0	0	0	0	0	-0.80207	-0.82279	0	0	0	0	0	0	0	-0.81066	-0.80568	0	0	0	0	0	0	0	0	0	0	-0.8061	0	0	0	0	0	0	0	0	0	0	0	0	0	0	0	0	0	0	0	0	0
P48643	0	0	0	0	0	0	0	-0.80532	0	0	0	0	0	0	0	-0.83453	-0.80876	0	0	0	0	0	0	0	0	0	0	0	0	0	0	0	0	0	0	0	0	0	0	0	0	0	0	0	0	0	0	0	0
Q14498	0	0	0	0	0	0	-0.8413	-0.85402	0	-0.80004	0	0	0	0	0	-0.86957	-0.86563	-0.82745	0	0	0	0	0	0	0	0	0	0	0	0	0	0	0	0	0	0	0	0	0	0	0	0	0	0	0	0	0	0	0
Q96C86	0	-0.80766	-0.80128	-0.86163	0	-0.83974	-0.85608	-0.84648	0	-0.80324	0	0	0	0	-0.81168	-0.80182	0	0	0	0	0	0	0	0	0	-0.80763	0	0	0	0	0	0	0	0	0	0	0	0	0	0	0	0	-0.80775	0	0	0	0	0	0
O75340	-0.86571	-0.84581	-0.82074	-0.89787	-0.82223	-0.83368	-0.89289	-0.88652	-0.84797	-0.83757	-0.83232	-0.87033	0	0	-0.85535	-0.8309	0	0	-0.84888	0	0	0	0	-0.85479	-0.84176	-0.83053	0	0	0	-0.83252	0	0	0	0	0	0	0	0	0	0	0	0	0	0	0	0	0	0	0
P31939	-0.84841	-0.84043	0	-0.87774	0	-0.80031	-0.86523	-0.8587	-0.81191	0	0	-0.80884	0	0	-0.83097	-0.80663	0	0	-0.8521	0	0	0	0	0	-0.82921	-0.81649	0	-0.824	0	0	0	0	0	0	0	0	0	0	0	0	0	0	0	0	0	0	0	0	0
P49419	-0.81318	-0.84333	0	-0.8618	-0.81687	-0.80462	-0.81708	-0.81422	0	0	0	0	0	0	-0.83783	0	0	0	-0.82403	0	0	0	0	0	-0.81133	-0.81348	0	0	0	0	0	0	0	0	0	0	0	0	0	0	0	0	0	0	0	0	0	0	0
P62937	-0.84089	-0.82564	0	-0.84814	0	-0.81354	-0.80676	-0.80991	0	0	0	0	0	0	-0.85739	0	0	0	-0.82202	0	0	0	0	0	0	0	0	0	0	0	0	0	0	0	0	0	0	0	0	0	0	0	0	0	0	0	0	0	0
P05023	-0.83036	-0.87993	-0.82585	-0.91921	-0.91624	-0.89368	-0.90886	-0.90128	-0.89868	-0.89758	-0.91192	-0.93508	-0.913	-0.88789	-0.83052	-0.82051	0	0	-0.83917	-0.83154	-0.83697	0	-0.83394	-0.87414	-0.85697	-0.86718	0	0	-0.82995	-0.84631	0	0	0	0	0	-0.81472	-0.82254	0	0	0	0	0	0	0	0	0	0	0	0
P10599	-0.90323	-0.92098	-0.87402	-0.93136	-0.85157	-0.89073	-0.89985	-0.90154	-0.87346	-0.90017	-0.90792	-0.89269	-0.89876	-0.89131	-0.89522	-0.82622	-0.80174	0	-0.85206	-0.81353	0	-0.80479	0	-0.867	-0.84099	-0.84497	-0.81133	0	-0.83177	-0.8411	0	0	0	-0.82284	0	-0.84701	-0.84271	0	0	0	0	0	0	0	0	0	0	0	0
O95202	-0.82816	-0.9114	-0.84363	-0.93527	-0.92443	-0.88168	-0.92735	-0.90464	-0.92411	-0.88589	-0.90582	-0.90824	-0.8753	-0.85585	-0.81536	-0.84144	0	0	-0.80841	-0.83091	-0.81155	0	0	-0.87604	-0.85614	-0.88487	-0.80102	0	-0.81504	0	-0.8601	0	0	0	0	0	0	0	0	0	0	0	0	0	0	0	0	0	0
P50914	0	-0.85485	-0.80009	-0.9017	-0.91338	-0.89181	-0.92481	-0.91646	-0.92541	-0.89136	-0.92137	-0.90283	-0.87499	-0.8603	-0.8398	-0.86351	-0.84501	0	0	-0.81219	0	0	0	-0.84073	0	-0.80528	-0.86117	0	-0.81565	0	-0.83146	0	0	0	0	0	0	0	0	0	0	0	0	0	0	0	0	0	0
Q92841	0	-0.82868	-0.81339	-0.8491	-0.84777	-0.91518	-0.92039	-0.91326	-0.87801	-0.88201	-0.86372	-0.84702	-0.84123	-0.83573	-0.87505	-0.86271	-0.816	0	0	0	0	0	0	0	0	0	0	0	0	0	0	0	0	0	0	0	0	0	0	0	0	0	0	0	0	0	0	0	0
Q14258	0	-0.84819	0	-0.85027	-0.83873	-0.88691	-0.89337	-0.8808	-0.85517	-0.84038	-0.84588	-0.83398	-0.83156	-0.80039	-0.83884	-0.83065	0	0	0	0	0	0	0	0	0	0	-0.81012	0	0	0	0	0	0	0	0	0	0	0	0	0	0	0	0	0	0	0	0	0	0
Q9UMX0	0	-0.841	-0.82082	-0.8509	-0.83262	-0.91355	-0.90816	-0.89556	-0.86616	-0.86271	-0.85968	-0.83299	-0.83869	-0.81317	-0.84783	-0.84959	-0.81507	0	0	0	0	0	0	0	0	0	-0.80515	0	0	0	0	0	0	0	0	0	0	0	0	0	0	0	0	0	0	0	0	0	0
O94826	-0.86433	-0.84665	-0.81945	-0.88246	-0.86887	-0.87354	-0.9704	-0.95806	-0.9285	-0.91655	-0.89758	-0.91013	-0.87012	-0.86349	-0.86284	-0.92385	-0.88825	-0.8358	-0.84375	0	-0.80291	0	0	-0.86573	-0.83716	0	0	0	0	0	0	0	0	0	0	0	0	0	0	0	0	0	0	0	0	0	0	0	0
P84103	-0.80868	-0.81915	-0.80673	-0.84236	-0.84619	-0.89459	-0.94901	-0.93936	-0.90307	-0.90424	-0.8816	-0.88365	-0.86988	-0.86196	-0.86462	-0.90958	-0.86504	0	0	0	0	0	0	-0.80966	0	0	0	0	0	0	0	0	0	0	0	0	0	0	0	0	0	0	0	0	0	0	0	0	0
P00505	-0.89166	-0.90117	-0.83136	-0.91085	-0.83232	-0.86232	-0.90231	-0.88912	-0.87069	-0.84997	-0.86471	-0.84946	-0.83777	-0.81231	-0.84201	-0.84495	-0.80248	-0.83399	-0.8738	0	0	0	0	-0.83366	-0.8521	-0.82924	0	0	0	-0.82696	0	0	0	0	0	0	0	0	0	0	0	-0.81334	-0.8048	0	0	0	0	0	0
O43390	-0.82177	-0.87539	-0.8343	-0.90765	-0.84657	-0.89562	-0.89542	-0.88958	-0.86656	-0.85106	-0.86521	-0.85958	-0.81918	-0.80778	-0.87278	-0.83066	0	0	0	0	0	0	0	-0.82186	0	-0.81358	-0.87434	0	0	0	0	0	0	0	0	0	0	0	0	0	0	0	0	0	0	0	0	0	0
O75390	-0.83727	-0.87656	-0.81728	-0.93898	-0.89947	-0.91585	-0.92509	-0.91244	-0.92617	-0.88311	-0.89838	-0.87925	-0.83574	-0.83872	-0.83184	-0.84942	-0.8097	0	-0.84503	-0.82445	-0.80137	0	0	-0.84848	-0.83325	-0.87022	-0.8378	0	0	0	-0.83853	0	0	0	0	0	0	0	0	0	0	0	0	0	0	0	0	0	0
P35222	-0.87673	-0.89141	-0.86024	-0.93478	-0.89477	-0.88277	-0.93947	-0.92889	-0.9208	-0.90054	-0.91286	-0.89716	-0.85358	-0.84949	-0.87413	-0.87758	-0.83466	0	-0.84162	-0.82772	-0.82418	0	-0.80039	-0.89128	-0.87016	-0.85236	-0.82022	0	0	-0.83981	-0.80125	0	0	0	0	0	0	0	0	0	0	0	0	0	0	0	0	0	0
P49411	-0.85163	-0.87609	-0.81144	-0.91876	-0.86495	-0.88546	-0.91132	-0.89878	-0.88513	-0.8562	-0.86087	-0.85528	-0.81663	-0.8043	-0.83807	-0.83761	0	-0.80332	-0.86191	0	0	0	0	-0.83556	-0.85138	-0.84957	0	0	0	0	0	0	0	0	0	0	0	0	0	0	0	0	0	0	0	0	0	0	0
P19338	-0.88004	-0.85785	-0.8332	-0.89088	-0.85243	-0.91934	-0.95141	-0.94105	-0.91739	-0.90226	-0.8903	-0.8789	-0.8558	-0.8489	-0.86788	-0.89922	-0.86172	-0.84101	-0.86806	0	0	0	0	-0.84296	-0.81189	0	0	0	0	0	0	0	0	0	0	0	0	0	0	0	0	0	0	0	0	0	0	0	0
P13010	-0.82446	-0.82638	-0.80243	-0.89611	-0.8709	-0.92564	-0.92938	-0.92209	-0.91338	-0.87937	-0.87268	-0.85247	0	-0.80995	-0.85553	-0.86203	-0.82365	0	-0.83138	0	0	0	0	-0.82615	0	0	0	0	0	0	0	0	0	0	0	0	0	0	0	0	0	0	0	0	0	0	0	0	0
P41252	-0.83761	-0.8289	-0.83736	-0.89121	-0.84464	-0.90907	-0.93686	-0.9225	-0.91302	-0.88269	-0.87806	-0.84418	0	-0.80698	-0.84913	-0.89441	-0.83529	0	-0.80249	0	0	0	0	-0.84045	0	0	-0.81263	0	0	0	0	0	0	0	0	0	0	0	0	0	0	0	0	0	0	0	0	0	0
P08865	-0.83251	-0.84381	-0.8462	-0.88283	-0.86051	-0.94593	-0.95032	-0.93873	-0.91614	-0.90821	-0.8913	-0.8667	-0.84968	-0.84893	-0.87279	-0.89572	-0.84703	0	-0.80177	0	0	0	0	-0.83273	0	0	0	0	0	0	0	0	0	0	0	0	0	0	0	0	0	0	0	0	0	0	0	0	0
P61978	-0.81909	-0.81447	-0.8237	-0.85683	-0.84145	-0.92748	-0.94512	-0.94224	-0.90591	-0.90508	-0.88529	-0.86024	-0.83668	-0.84633	-0.89811	-0.90629	-0.86091	0	0	0	0	0	0	-0.809	0	0	-0.80819	0	0	0	0	0	0	0	0	0	0	0	0	0	0	0	0	0	0	0	0	0	0
P31943	-0.81595	-0.8098	0	-0.8617	-0.82367	-0.92137	-0.91721	-0.91826	-0.87643	-0.87436	-0.8567	-0.82665	-0.80223	-0.81262	-0.89098	-0.87077	-0.82679	0	-0.80384	0	0	0	0	0	0	0	-0.81498	0	0	0	0	0	0	0	0	0	0	0	0	0	0	0	0	0	0	0	0	0	0
Q00839	-0.84082	-0.85064	-0.82839	-0.88302	-0.8913	-0.90777	-0.94807	-0.94334	-0.92244	-0.91036	-0.89812	-0.87243	-0.84485	-0.85575	-0.90393	-0.88847	-0.84902	0	-0.82644	0	-0.80596	0	0	-0.83477	0	0	0	0	0	0	0	0	0	0	0	0	0	0	0	0	0	0	0	0	0	0	0	0	0
P62314	-0.82602	-0.85864	-0.82679	-0.89154	-0.90369	-0.90829	-0.95947	-0.95249	-0.95169	-0.94232	-0.94628	-0.89564	-0.90762	-0.91651	-0.87582	-0.91745	-0.89235	0	0	-0.81494	-0.84818	0	-0.81179	-0.83873	0	-0.80991	-0.83607	0	0	0	-0.86677	0	0	0	0	0	0	0	0	0	0	0	0	0	0	0	0	0	0
Q12905	-0.81605	-0.86567	-0.85509	-0.86045	-0.85846	-0.92203	-0.94663	-0.92951	-0.90969	-0.91072	-0.9036	-0.85417	-0.88958	-0.86951	-0.86334	-0.90285	-0.86219	0	0	0	0	0	0	-0.81771	0	0	0	0	0	0	0	0	0	0	0	0	0	0	0	0	0	0	0	0	0	0	0	0	0
E9PAV3	-0.85631	-0.85382	-0.8665	-0.86685	-0.82927	-0.92073	-0.96078	-0.9505	-0.9175	-0.92375	-0.91218	-0.86355	-0.87759	-0.87328	-0.89352	-0.93762	-0.89577	0	0	0	0	0	0	-0.83312	0	0	-0.80887	0	0	-0.80719	0	0	0	0	0	0	0	0	0	0	0	0	0	0	0	0	0	0	0
Q16629	-0.83934	-0.84551	-0.8481	-0.85591	-0.83353	-0.9242	-0.94201	-0.93444	-0.89946	-0.91052	-0.89587	-0.83449	-0.86442	-0.86075	-0.89355	-0.90873	-0.86883	0	0	0	0	0	0	-0.80659	0	0	0	0	0	0	0	0	0	0	0	0	0	0	0	0	0	0	0	0	0	0	0	0	0
O00299	-0.81031	-0.84115	-0.80932	-0.84996	-0.85832	-0.9136	-0.88938	-0.88443	-0.87304	-0.85831	-0.86172	-0.803	-0.81662	-0.81275	-0.87342	-0.8257	0	0	-0.80948	0	0	0	0	0	0	0	0	0	0	0	0	0	0	0	0	0	0	0	0	0	0	0	0	0	0	0	0	0	0
P28066	-0.81025	-0.83879	-0.83875	-0.84849	-0.80439	-0.90567	-0.90037	-0.89605	-0.86235	-0.87054	-0.86917	0	-0.81712	-0.8179	-0.8906	-0.86952	-0.8259	0	0	0	0	0	0	0	0	0	-0.85548	0	0	0	0	0	0	0	0	0	0	0	0	0	0	0	0	0	0	0	0	0	0
P08579	-0.80888	-0.83628	0	-0.86093	-0.86519	-0.92987	-0.9382	-0.92885	-0.91463	-0.89882	-0.89693	-0.85769	-0.87447	-0.86154	-0.85307	-0.8922	-0.86338	0	-0.80459	0	0	0	0	0	0	0	0	0	0	0	0	0	0	0	0	0	0	0	0	0	0	0	0	0	0	0	0	0	0
P26599	-0.80342	-0.84919	-0.82682	-0.89253	-0.8847	-0.93681	-0.93957	-0.93021	-0.91989	-0.89984	-0.9047	-0.86918	-0.85537	-0.84773	-0.8661	-0.88215	-0.84843	0	0	0	0	0	0	-0.82815	0	0	-0.83501	0	0	0	0	0	0	0	0	0	0	0	0	0	0	0	0	0	0	0	0	0	0
P68366	-0.84911	-0.8155	0	-0.88169	-0.83469	-0.82622	-0.91198	-0.91206	-0.86963	-0.86177	-0.83421	-0.84751	0	0	-0.85699	-0.84619	-0.81671	-0.8315	-0.87286	-0.80697	0	0	0	-0.82568	-0.85711	-0.81524	0	0	0	0	0	0	0	0	0	0	0	0	0	0	0	0	0	0	0	0	0	0	0
P23526	-0.90531	-0.86591	0	-0.88812	-0.88711	-0.80843	-0.93159	-0.93147	-0.91505	-0.90106	-0.89393	-0.88851	-0.85753	-0.87122	-0.87747	-0.86855	-0.85982	-0.9161	-0.93086	-0.86342	-0.84251	-0.84781	-0.82	-0.85291	-0.90151	-0.82029	0	0	0	0	0	-0.81258	-0.84536	0	0	0	0	0	-0.85738	-0.81963	0	0	0	0	0	0	0	0	0
Q13185	-0.90137	-0.82344	-0.80412	-0.8815	-0.82274	-0.8437	-0.94034	-0.94122	-0.9109	-0.90005	-0.87884	-0.83823	0	-0.83521	-0.89453	-0.91084	-0.87551	-0.86902	-0.88484	-0.80025	-0.81906	0	0	-0.83511	-0.82525	0	0	0	0	0	0	0	0	0	0	0	0	0	0	0	0	0	0	0	0	0	0	0	0
Q9Y2R9	-0.80952	0	0	-0.83557	0	-0.85772	-0.86765	-0.88456	-0.82449	-0.84584	-0.80794	0	0	-0.80908	-0.84655	-0.8448	-0.80774	0	-0.85381	0	0	0	0	0	0	0	0	0	0	0	0	0	0	0	0	0	0	0	0	0	0	0	0	0	0	0	0	0	0
Q9NVP1	-0.90265	-0.82315	0	-0.91357	-0.85442	-0.83142	-0.95972	-0.97044	-0.93759	-0.94095	-0.92446	-0.92101	-0.85063	-0.90158	-0.90751	-0.93167	-0.91052	-0.86681	-0.88523	-0.87931	-0.88075	-0.83386	-0.83184	-0.87879	-0.8547	-0.83847	-0.80661	0	-0.81144	-0.81934	0	-0.82785	-0.83758	0	0	0	0	0	0	0	0	0	0	0	0	0	0	0	0
O43324	-0.89754	-0.83505	0	-0.91133	-0.80625	-0.86517	-0.93219	-0.93458	-0.90066	-0.88835	-0.88211	-0.87911	-0.82243	-0.8438	-0.8686	-0.90268	-0.86855	-0.86953	-0.88607	-0.80419	0	0	0	-0.83645	-0.8204	-0.82285	-0.81811	0	0	-0.82656	0	-0.80801	0	0	0	0	0	0	0	0	0	0	0	0	0	0	0	0	0
Q6P2E9	-0.89166	-0.83737	-0.80418	-0.91975	-0.82039	-0.85873	-0.93365	-0.94217	-0.90709	-0.90352	-0.9009	-0.8887	-0.82739	-0.86144	-0.89765	-0.9057	-0.87573	-0.83566	-0.85849	-0.83398	-0.80789	0	0	-0.84984	-0.81752	-0.82589	-0.86245	-0.80804	-0.81014	-0.83064	0	0	0	0	0	0	0	0	0	0	0	0	0	0	0	0	0	0	0
Q08945	-0.80299	-0.86835	0	-0.89208	-0.88917	-0.80024	-0.87047	-0.86095	-0.86063	-0.82807	-0.84782	-0.82673	0	0	-0.83526	0	0	0	-0.80014	-0.84685	0	0	0	-0.82318	-0.85982	-0.83471	0	-0.81604	0	0	-0.82314	0	0	0	0	0	0	0	0	0	0	0	0	0	0	0	0	0	0
O75436	0	-0.84913	0	-0.86354	-0.86715	-0.8274	-0.89362	-0.8828	-0.86694	-0.8397	-0.84465	-0.83728	-0.82326	-0.80875	-0.82767	-0.82955	0	0	-0.8035	-0.80675	0	0	0	0	-0.8022	-0.81299	0	0	0	0	-0.83156	0	0	0	0	0	0	0	0	0	0	0	0	0	0	0	0	0	0
Q9GZT3	0	-0.83053	0	-0.8667	-0.83188	-0.81141	-0.83877	-0.82322	-0.81522	0	0	0	0	0	0	0	0	0	0	0	0	0	0	0	-0.80665	-0.82724	0	-0.81181	0	0	0	0	0	0	0	0	0	0	0	0	0	0	0	0	0	0	0	0	0
P50990	-0.89839	-0.81005	-0.81302	-0.84271	0	-0.8116	-0.93342	-0.93141	-0.87793	-0.87157	-0.84325	-0.83846	0	-0.80026	-0.90349	-0.92169	-0.86242	-0.83562	-0.84531	0	0	0	0	-0.82071	0	0	0	0	0	0	0	0	0	0	0	0	0	0	0	0	0	0	0	0	0	0	0	0	0
Q6NXG1	-0.84155	-0.80478	0	-0.84015	-0.82203	-0.83651	-0.93575	-0.92373	-0.89238	-0.86941	-0.83404	-0.83788	0	0	-0.85583	-0.89119	-0.83629	-0.80025	-0.82802	0	0	0	0	-0.81152	0	0	0	0	0	0	0	0	0	0	0	0	0	0	0	0	0	0	0	0	0	0	0	0	0
P51991	0	0	0	0	0	-0.83642	-0.86284	-0.87663	-0.80526	-0.80461	0	0	0	0	-0.85149	-0.8221	0	0	-0.82437	0	0	0	0	0	0	0	0	0	0	0	0	0	0	0	0	0	0	0	0	0	0	0	0	0	0	0	0	0	0
P33176	0	0	0	0	-0.81909	-0.80847	-0.88726	-0.88225	-0.84604	-0.81687	0	-0.8007	0	0	-0.83142	-0.83873	0	0	0	0	0	0	0	0	0	0	0	0	0	0	0	0	0	0	0	0	0	0	0	0	0	0	0	0	0	0	0	0	0
P62258	-0.85247	-0.82005	-0.83328	-0.84351	0	-0.83739	-0.89982	-0.90381	-0.83144	-0.86246	-0.82499	-0.80953	0	0	-0.92905	-0.85628	0	0	0	0	0	0	0	-0.80999	0	0	0	0	0	0	0	0	0	0	0	0	0	0	0	0	0	0	0	0	0	0	0	0	0
Q9BUL8	0	0	0	0	0	0	-0.81389	-0.81277	0	0	0	0	0	0	-0.80358	0	0	0	0	0	0	0	0	0	0	0	0	0	0	0	0	0	0	0	0	0	0	0	0	0	0	0	0	0	0	0	0	0	0
Q15287	0	0	0	0	0	-0.80835	-0.88178	-0.87937	-0.80722	-0.82993	0	-0.80079	0	0	-0.85836	-0.85759	0	0	0	0	0	0	0	0	0	0	0	0	0	0	0	0	0	0	0	0	0	0	0	0	0	0	0	0	0	0	0	0	0
Q9UHX1	0	0	0	0	0	0	-0.86782	-0.87059	0	-0.81984	0	-0.81044	0	0	-0.83431	-0.85196	0	0	0	0	0	0	0	0	0	0	0	0	0	0	0	0	0	0	0	0	0	0	0	0	0	0	0	0	0	0	0	0	0
Q00796	-0.83123	-0.87538	-0.84509	-0.87382	-0.8123	-0.85075	-0.87975	-0.85721	-0.83031	-0.83975	-0.83593	-0.85781	-0.85578	-0.81875	0	-0.81986	0	0	-0.80266	0	0	0	0	-0.82136	0	-0.84946	0	0	0	-0.84583	0	0	0	0	0	0	0	0	0	0	0	0	-0.84404	0	0	0	0	0	0
Q13630	-0.80644	-0.86353	-0.81728	-0.91156	-0.81353	-0.83522	-0.87416	-0.85105	-0.83563	-0.81388	-0.83198	-0.87941	-0.81788	0	0	-0.80832	0	0	0	0	0	0	0	-0.85381	-0.82882	-0.86235	0	0	-0.81801	-0.8374	0	0	0	0	0	0	0	0	0	0	0	-0.81592	-0.86003	0	0	0	0	0	0
P61604	-0.83538	-0.87471	-0.80932	-0.8667	0	-0.87066	-0.86579	-0.84373	-0.80738	-0.80342	-0.80968	-0.82138	-0.84008	0	0	-0.81257	0	0	-0.81105	0	0	0	0	0	0	0	0	0	0	-0.8108	0	0	0	0	0	0	0	0	0	0	0	-0.81175	-0.84807	0	-0.84242	0	0	0	0
O75439	0	-0.80168	0	0	0	-0.83323	-0.82833	-0.82243	0	0	0	0	-0.82616	0	0	0	0	0	0	0	0	0	0	0	0	0	0	0	0	0	0	0	0	0	0	0	0	0	0	0	0	0	0	0	0	0	0	0	0
P13804	-0.80553	-0.83456	0	-0.87433	-0.81553	-0.85728	-0.90389	-0.89783	-0.84209	-0.86959	-0.85573	-0.90505	-0.89904	-0.86079	-0.80825	-0.84953	-0.81455	0	-0.80872	0	0	0	0	-0.81328	-0.80769	-0.83012	0	0	-0.80901	0	0	0	0	0	0	0	0	0	0	0	0	0	0	0	0	0	0	0	0
Q92598	0	-0.80676	0	0	-0.83191	0	-0.88564	-0.87587	-0.8505	-0.83141	-0.82962	-0.80483	-0.82057	-0.80055	-0.82529	-0.85001	-0.81381	-0.81401	-0.81928	0	0	0	0	0	0	0	0	0	0	0	0	0	0	0	0	0	0	0	0	0	0	0	0	0	0	0	0	0	0
P60866	0	-0.83849	0	-0.83029	-0.84782	-0.87068	-0.89841	-0.87811	-0.86869	-0.85665	-0.86558	-0.80943	-0.85978	-0.82594	-0.80192	-0.85205	-0.81828	0	0	0	0	0	0	0	0	0	0	0	0	0	-0.82241	0	0	0	0	0	0	0	0	0	0	0	0	0	0	0	0	0	0
Q9BZZ5	0	-0.84092	0	-0.8222	-0.82313	-0.84244	-0.9029	-0.89654	-0.86122	-0.86687	-0.8604	-0.80319	-0.86245	-0.84833	-0.85492	-0.86887	-0.84572	0	0	0	0	0	0	0	0	0	0	0	0	0	-0.81792	0	0	0	0	0	0	0	0	0	0	0	0	0	0	0	0	0	0
P23396	0	0	0	-0.80538	-0.83877	-0.86169	-0.90024	-0.89796	-0.86296	-0.87874	-0.87347	-0.82134	-0.87306	-0.85659	-0.82437	-0.8686	-0.85793	0	0	0	0	0	0	0	0	0	0	0	0	0	0	0	0	0	0	0	0	0	0	0	0	0	0	0	0	0	0	0	0
P62888	0	-0.8074	0	-0.82879	-0.82847	-0.86565	-0.89534	-0.87914	-0.86071	-0.84852	-0.85447	-0.80624	-0.8395	-0.81187	0	-0.86028	-0.82274	0	0	0	0	0	0	0	0	0	-0.81034	0	0	0	-0.80938	0	0	0	0	0	0	0	0	0	0	0	0	0	0	0	0	0	0
Q53GQ0	0	-0.81316	0	-0.85471	-0.88358	-0.84332	-0.93277	-0.93884	-0.90616	-0.91209	-0.90872	-0.86755	-0.86079	-0.87454	-0.90048	-0.8933	-0.88565	0	0	-0.82436	-0.80972	-0.82007	0	-0.81134	0	0	-0.82255	0	0	0	0	0	0	0	0	0	0	0	0	0	0	0	0	0	0	0	0	0	0
P62244	0	0	0	-0.83017	-0.83623	-0.87033	-0.93914	-0.93549	-0.89073	-0.88713	-0.86011	-0.8443	-0.82823	-0.83009	-0.85138	-0.90341	-0.8789	0	0	0	0	0	0	0	0	0	0	0	0	0	0	0	0	0	0	0	0	0	0	0	0	0	0	0	0	0	0	0	0
P62249	0	-0.82926	0	-0.86054	-0.86572	-0.87457	-0.93831	-0.92474	-0.90383	-0.88531	-0.87285	-0.84694	-0.83905	-0.8333	-0.84041	-0.88841	-0.85285	0	0	0	0	0	0	-0.80206	0	0	0	0	0	0	0	0	0	0	0	0	0	0	0	0	0	0	0	0	0	0	0	0	0
P41250	-0.80723	-0.82779	0	-0.88441	-0.87885	-0.86398	-0.94924	-0.94247	-0.93916	-0.90587	-0.92346	-0.91049	-0.88721	-0.87376	-0.82052	-0.91087	-0.91716	-0.84925	0	-0.80362	0	0	0	-0.83887	-0.81905	0	0	0	-0.80128	0	0	0	0	0	0	0	0	0	0	0	0	0	0	0	0	0	0	0	0
P62269	0	-0.82945	0	-0.87559	-0.89849	-0.86027	-0.94417	-0.93741	-0.92982	-0.91926	-0.91591	-0.87061	-0.88142	-0.88297	-0.83365	-0.8895	-0.89409	-0.80549	0	-0.82794	-0.8231	0	0	-0.83142	-0.83712	0	0	0	0	0	0	0	0	0	0	0	0	0	0	0	0	0	0	0	0	0	0	0	0
Q96AG4	0	0	0	-0.81827	-0.8018	-0.89329	-0.94162	-0.9401	-0.88344	-0.91892	-0.89129	-0.84617	-0.87981	-0.8798	-0.87309	-0.92889	-0.90339	0	0	0	0	0	0	0	0	0	0	0	0	0	0	0	0	0	0	0	0	0	0	0	0	0	0	0	0	0	0	0	0
P30050	0	-0.83698	-0.81195	-0.85311	-0.8632	-0.90203	-0.93192	-0.9224	-0.90686	-0.91583	-0.92215	-0.85798	-0.91147	-0.89488	-0.84566	-0.90011	-0.87896	0	0	0	0	0	0	0	0	0	-0.83389	0	0	0	-0.82541	0	0	0	0	0	0	0	0	0	0	0	0	0	0	0	0	0	0
P25398	-0.80188	-0.82997	-0.82986	-0.8459	-0.82826	-0.91475	-0.94106	-0.9334	-0.89332	-0.91192	-0.89785	-0.84704	-0.88289	-0.8731	-0.87726	-0.9162	-0.8759	0	0	0	0	0	0	0	0	0	-0.81516	0	0	0	0	0	0	0	0	0	0	0	0	0	0	0	0	0	0	0	0	0	0
P62277	0	0	0	-0.8235	-0.82123	-0.91726	-0.91691	-0.91045	-0.87004	-0.88373	-0.86664	-0.82259	-0.86347	-0.8468	-0.83292	-0.88164	-0.85363	0	0	0	0	0	0	0	0	0	0	0	0	0	0	0	0	0	0	0	0	0	0	0	0	0	0	0	0	0	0	0	0
P35232	-0.88603	-0.89093	-0.86781	-0.92757	-0.85702	-0.9218	-0.96715	-0.95719	-0.92585	-0.9367	-0.9294	-0.92025	-0.91633	-0.90289	-0.87253	-0.92039	-0.88853	0	-0.83036	0	-0.80463	0	0	-0.88334	-0.83352	-0.83652	0	0	-0.83595	-0.83393	0	0	0	-0.80229	0	0	0	0	0	0	0	0	-0.81276	0	0	0	0	0	0
Q00325	-0.815	-0.80413	-0.80906	-0.87598	0	-0.90784	-0.93644	-0.92141	-0.89576	-0.88674	-0.87252	-0.84794	-0.83009	-0.8335	-0.81001	-0.91943	-0.85763	0	0	0	0	0	0	-0.80744	0	-0.80425	-0.82155	0	0	-0.80105	0	0	0	0	0	0	0	0	0	0	0	0	0	0	0	0	0	0	0
P50897	0	0	0	-0.86151	-0.83667	-0.89747	-0.88544	-0.89446	-0.84924	-0.86893	-0.87031	-0.85249	-0.84945	-0.83655	-0.85712	-0.82831	-0.82133	0	0	0	0	0	0	0	0	0	-0.82243	0	0	0	0	0	0	0	0	0	0	0	0	0	0	0	0	0	0	0	0	0	0
Q9Y2Q3	0	-0.84768	-0.81122	-0.90069	0	-0.91903	-0.8555	-0.84522	-0.80453	-0.82686	-0.82586	-0.82908	-0.83442	-0.80335	0	0	0	0	0	0	0	0	0	0	0	-0.84745	-0.84695	0	-0.82645	0	0	0	0	0	0	0	0	0	0	0	0	0	-0.80713	0	0	0	0	0	0
Q07666	0	-0.81592	0	-0.85366	0	-0.83108	-0.87877	-0.87173	-0.84894	-0.83166	-0.84229	0	0	0	-0.81952	-0.85607	-0.82071	0	0	0	0	0	0	0	0	0	-0.83938	0	0	0	-0.81316	0	0	0	0	0	0	0	0	0	0	0	0	0	0	0	0	0	0
Q92499	0	0	0	-0.81377	0	-0.84664	-0.85276	-0.85744	-0.80773	-0.80947	0	0	0	0	-0.80448	-0.83134	0	0	0	0	0	0	0	0	0	0	-0.83642	0	0	0	0	0	0	0	0	0	0	0	0	0	0	0	0	0	0	0	0	0	0
P16615	0	0	0	-0.85339	-0.84491	-0.85333	-0.90496	-0.91131	-0.88588	-0.87901	-0.86546	-0.82207	-0.80179	-0.83353	-0.83923	-0.86447	-0.84861	0	0	-0.82013	-0.80776	0	0	0	0	0	-0.8044	0	0	0	0	0	0	0	0	0	0	0	0	0	0	0	0	0	0	0	0	0	0
P60842	0	0	0	-0.84442	-0.80235	-0.86033	-0.90448	-0.90185	-0.87174	-0.84397	-0.83784	0	0	0	-0.83421	-0.87721	-0.84572	0	0	0	0	0	0	0	0	0	-0.81252	0	0	0	0	0	0	0	0	0	0	0	0	0	0	0	0	0	0	0	0	0	0
Q15365	-0.8141	-0.80498	0	-0.86161	0	-0.86655	-0.88314	-0.87959	-0.84627	-0.82275	-0.81698	0	0	0	-0.84799	-0.8449	0	0	-0.80001	0	0	0	0	0	0	0	-0.82448	0	0	0	0	0	0	0	0	0	0	0	0	0	0	0	0	0	0	0	0	0	0
O00303	-0.80835	0	0	-0.85363	0	-0.91052	-0.92816	-0.91716	-0.88044	-0.86798	-0.84491	-0.81788	0	0	-0.82301	-0.89314	-0.8518	0	0	0	0	0	0	0	0	0	0	0	0	0	0	0	0	0	0	0	0	0	0	0	0	0	0	0	0	0	0	0	0
O60506	-0.80306	0	0	-0.8164	0	-0.87151	-0.91022	-0.90403	-0.84859	-0.8386	-0.81688	0	0	0	-0.8542	-0.89526	-0.84684	0	0	0	0	0	0	0	0	0	0	0	0	0	0	0	0	0	0	0	0	0	0	0	0	0	0	0	0	0	0	0	0
P12004	-0.84839	-0.81182	-0.81013	-0.84161	0	-0.8774	-0.92804	-0.92084	-0.87064	-0.86899	-0.85122	-0.81366	-0.80494	-0.80138	-0.87089	-0.91203	-0.86458	-0.80075	-0.80117	0	0	0	0	0	0	0	0	0	0	0	0	0	0	0	0	0	0	0	0	0	0	0	0	0	0	0	0	0	0
Q96HE7	-0.82038	-0.84546	-0.80197	-0.84536	0	-0.88461	-0.86793	-0.86186	-0.81799	-0.84463	-0.84435	0	-0.84853	-0.82501	-0.83024	-0.84115	-0.80383	0	0	0	0	0	0	0	0	0	-0.8113	0	0	0	0	0	0	0	0	0	0	0	0	0	0	0	0	0	0	0	0	0	0
Q9P258	-0.84929	-0.89412	-0.831	-0.91743	-0.86005	-0.89339	-0.9324	-0.91947	-0.91541	-0.89364	-0.91455	-0.86414	-0.87832	-0.86487	-0.84645	-0.89092	-0.85966	0	-0.80621	-0.80468	0	0	0	-0.82985	-0.80882	-0.83024	-0.86381	0	0	-0.8062	-0.8564	0	0	0	0	0	0	0	0	0	0	0	0	0	0	0	0	0	0
P21796	-0.80074	-0.81842	0	-0.84176	0	-0.90036	-0.92578	-0.92107	-0.87407	-0.89075	-0.87452	-0.81644	-0.86014	-0.85595	-0.86306	-0.90953	-0.87216	0	0	0	0	0	0	0	0	0	-0.82627	0	0	0	0	0	0	0	0	0	0	0	0	0	0	0	0	0	0	0	0	0	0
Q9H3K6	-0.80239	-0.87139	0	-0.8784	-0.8397	-0.89275	-0.91919	-0.90833	-0.87697	-0.87902	-0.87969	-0.84454	-0.88191	-0.85291	-0.84116	-0.86727	-0.84595	0	0	0	0	0	0	0	0	0	-0.80205	0	0	0	0	0	0	0	0	0	0	0	0	0	0	0	0	0	0	0	0	0	0
P11177	-0.83706	-0.82891	0	-0.85555	-0.83884	-0.82095	-0.94602	-0.9452	-0.88994	-0.92959	-0.90981	-0.90274	-0.92607	-0.91784	-0.86633	-0.92595	-0.90256	0	-0.80852	-0.81983	-0.85213	0	-0.8607	-0.83275	-0.82011	-0.80248	0	0	0	-0.8071	0	0	0	0	0	-0.80444	0	0	0	0	0	0	0	0	0	0	0	0	0
P34897	-0.88378	-0.866	-0.82556	-0.89396	-0.85217	-0.85416	-0.95036	-0.94593	-0.91716	-0.93332	-0.92844	-0.89	-0.91206	-0.91579	-0.87395	-0.92707	-0.8953	-0.82285	-0.85575	-0.83751	-0.8677	0	-0.86389	-0.84714	-0.83411	-0.83479	0	0	0	-0.844	-0.83457	0	0	0	0	0	0	0	0	0	0	0	0	0	0	0	0	0	0
P38919	0	0	0	-0.83157	0	-0.87345	-0.91467	-0.91835	-0.86123	-0.86996	-0.84747	-0.81312	-0.80072	-0.8085	-0.86408	-0.89522	-0.86331	0	0	0	0	0	0	0	0	0	0	0	0	0	0	0	0	0	0	0	0	0	0	0	0	0	0	0	0	0	0	0	0
P07910	-0.83805	-0.82946	-0.81387	-0.88869	-0.84592	-0.9097	-0.94658	-0.94796	-0.91021	-0.9137	-0.9061	-0.87337	-0.8571	-0.86575	-0.89574	-0.91492	-0.88187	0	-0.80682	0	0	0	0	-0.82585	0	0	-0.84502	0	0	0	0	0	0	0	0	0	0	0	0	0	0	0	0	0	0	0	0	0	0
P55884	-0.84154	-0.82808	0	-0.89003	-0.83805	-0.87093	-0.93327	-0.93672	-0.88625	-0.90324	-0.88594	-0.86568	-0.8502	-0.86059	-0.88686	-0.89514	-0.86272	0	-0.83281	-0.81485	-0.81334	0	0	-0.82356	-0.81636	-0.8172	-0.80839	0	0	0	0	0	0	0	0	0	0	0	0	0	0	0	0	0	0	0	0	0	0
Q8NC51	0	-0.80796	0	-0.81691	0	-0.85438	-0.88408	-0.87582	-0.82485	-0.83971	-0.8371	-0.80794	-0.84055	-0.80874	-0.83105	-0.86449	-0.813	0	0	0	0	0	0	0	0	0	-0.80454	0	0	0	0	0	0	0	0	0	0	0	0	0	0	0	0	0	0	0	0	0	0
P14868	0	0	0	-0.82365	0	-0.86314	-0.92483	-0.92013	-0.8569	-0.86874	-0.84742	-0.82371	-0.8322	-0.818	-0.85813	-0.90952	-0.87468	0	0	0	0	0	0	0	0	0	0	0	0	0	0	0	0	0	0	0	0	0	0	0	0	0	0	0	0	0	0	0	0
P20618	0	0	0	-0.80793	0	-0.87821	-0.89399	-0.89215	-0.81988	-0.84849	-0.82027	0	-0.80749	-0.80261	-0.85906	-0.88505	-0.83132	0	0	0	0	0	0	0	0	0	-0.81755	0	0	0	0	0	0	0	0	0	0	0	0	0	0	0	0	0	0	0	0	0	0
P35637	-0.84098	-0.85939	-0.80529	-0.86942	-0.81868	-0.86569	-0.9323	-0.932	-0.86962	-0.90104	-0.88285	-0.8682	-0.89232	-0.88007	-0.89251	-0.89839	-0.86738	0	-0.8029	0	0	0	0	-0.80091	0	0	0	0	0	0	0	0	0	0	0	0	0	0	0	0	0	0	0	0	0	0	0	0	0
Q13838	0	-0.80734	0	-0.83278	0	-0.87561	-0.90351	-0.90382	-0.83979	-0.85908	-0.83914	-0.82979	-0.83599	-0.82625	-0.86978	-0.87563	-0.82966	0	0	0	0	0	0	0	0	0	-0.81696	0	0	0	0	0	0	0	0	0	0	0	0	0	0	0	0	0	0	0	0	0	0
P23246	0	0	0	-0.84066	-0.81465	-0.88339	-0.92818	-0.92702	-0.87691	-0.87818	-0.85321	-0.84285	-0.82449	-0.82935	-0.86163	-0.89887	-0.85554	0	0	0	0	0	0	0	0	0	0	0	0	0	0	0	0	0	0	0	0	0	0	0	0	0	0	0	0	0	0	0	0
P62851	0	0	0	-0.82376	-0.8417	-0.83136	-0.93408	-0.93794	-0.88398	-0.89602	-0.87466	-0.85277	-0.8437	-0.85047	-0.8819	-0.9081	-0.89072	0	0	0	0	0	0	0	0	0	0	0	0	0	0	0	0	0	0	0	0	0	0	0	0	0	0	0	0	0	0	0	0
Q92945	-0.8674	-0.86784	-0.83661	-0.90236	0	-0.8746	-0.91626	-0.91147	-0.86819	-0.86962	-0.87371	-0.84825	-0.83256	-0.82813	-0.8753	-0.89296	-0.84248	0	0	0	0	0	0	-0.81822	0	-0.80335	-0.87805	0	0	-0.83188	0	0	0	0	0	0	0	0	0	0	0	0	0	0	0	0	0	0	0
Q9Y265	-0.80974	-0.80256	0	-0.82943	0	-0.83687	-0.90315	-0.8907	-0.83259	-0.83656	-0.82261	-0.80443	-0.81766	0	-0.80673	-0.89613	-0.84716	0	0	0	0	0	0	0	0	0	0	0	0	0	0	0	0	0	0	0	0	0	0	0	0	0	0	0	0	0	0	0	0
P78371	-0.85669	0	0	-0.84426	0	-0.84212	-0.92937	-0.9265	-0.85396	-0.87319	-0.83638	-0.83174	-0.81738	-0.8235	-0.84861	-0.92652	-0.87761	-0.81947	-0.83143	0	0	0	0	0	0	0	0	0	0	0	0	0	0	0	0	0	0	0	0	0	0	0	0	0	0	0	0	0	0
Q08211	-0.81302	0	0	-0.84257	0	-0.86414	-0.93818	-0.93726	-0.8763	-0.88755	-0.8617	-0.85677	-0.85287	-0.84796	-0.84861	-0.92312	-0.89323	-0.81547	-0.81027	0	0	0	0	0	0	0	0	0	0	0	0	0	0	0	0	0	0	0	0	0	0	0	0	0	0	0	0	0	0
O00410	-0.81901	0	0	-0.80603	0	-0.8018	-0.87464	-0.87274	-0.81069	-0.80419	0	0	0	0	-0.80345	-0.87055	-0.83357	-0.85495	-0.83271	0	0	0	0	0	0	0	0	0	0	0	0	0	0	0	0	0	0	0	0	0	0	0	0	0	0	0	0	0	0
Q14160	-0.82566	0	0	-0.8663	0	-0.86891	-0.90386	-0.90643	-0.85997	-0.8548	-0.83017	-0.8262	0	-0.80623	-0.8171	-0.86984	-0.83767	-0.84836	-0.87599	0	0	0	0	0	0	-0.8024	0	0	0	0	0	0	0	0	0	0	0	0	0	0	0	0	0	0	0	0	0	0	0
P52597	-0.83286	0	0	-0.8141	0	-0.80148	-0.88505	-0.89029	-0.81267	-0.83383	-0.8045	-0.80376	0	0	-0.83563	-0.89253	-0.83909	-0.81102	-0.83089	0	0	0	0	0	0	0	0	0	0	0	0	0	0	0	0	0	0	0	0	0	0	0	0	0	0	0	0	0	0
Q9UJZ1	-0.86688	0	0	-0.83151	0	0	-0.89119	-0.89437	-0.82367	-0.8502	-0.83078	-0.82455	-0.80029	-0.81002	-0.86171	-0.89652	-0.83806	0	-0.82888	0	0	0	0	0	0	0	0	0	0	-0.85148	0	0	0	0	0	0	0	0	0	0	0	0	0	0	0	0	0	0	0
P09874	0	0	0	-0.80611	-0.81889	0	-0.89728	-0.89827	-0.84581	-0.84787	-0.83545	-0.82527	-0.81465	-0.81193	-0.84841	-0.87437	-0.85007	0	0	-0.80315	0	0	0	0	0	0	0	0	0	0	0	0	0	0	0	0	0	0	0	0	0	0	0	0	0	0	0	0	0
P34932	-0.80984	-0.80624	0	-0.84811	-0.82595	-0.81425	-0.87771	-0.87982	-0.83988	-0.83075	-0.82592	-0.81873	0	0	-0.84057	-0.82802	0	-0.82571	-0.86125	-0.80707	0	0	0	0	-0.81385	0	0	0	0	0	0	0	0	0	0	0	0	0	0	0	0	0	0	0	0	0	0	0	0
P18124	0	0	0	0	0	-0.84682	-0.8506	-0.83259	-0.80992	0	0	0	0	0	0	-0.83237	0	0	0	0	0	0	0	0	0	0	0	0	0	0	0	0	0	0	0	0	0	0	0	0	0	0	0	0	0	0	0	0	0
P62081	0	0	0	0	0	-0.85462	-0.84688	-0.83024	0	0	0	0	0	0	0	-0.82776	0	0	0	0	0	0	0	0	0	0	0	0	0	0	0	0	0	0	0	0	0	0	0	0	0	0	0	0	0	0	0	0	0
P28838	0	0	0	0	0	-0.81669	-0.86462	-0.86338	-0.83025	-0.80837	-0.81388	0	0	0	-0.81	-0.86698	-0.84804	0	0	0	0	0	0	0	0	0	-0.81948	0	0	0	0	0	0	0	0	0	0	0	0	0	0	0	0	0	0	0	0	0	0
P63010	0	0	0	0	0	-0.81717	-0.86107	-0.86355	-0.81259	-0.83543	-0.83102	0	-0.80719	0	-0.81309	-0.86115	-0.84802	0	0	0	0	0	0	0	0	0	-0.8009	0	0	0	0	0	0	0	0	0	0	0	0	0	0	0	0	0	0	0	0	0	0
A1L0T0	0	0	0	-0.80701	0	-0.81749	0	0	0	0	0	0	0	0	0	0	0	0	0	0	0	0	0	0	0	0	-0.82398	0	0	0	0	0	0	0	0	0	0	0	0	0	0	0	0	0	0	0	0	0	0
Q16851	0	-0.81266	0	-0.83122	-0.80453	-0.82992	-0.83526	-0.83584	-0.809	-0.81211	-0.82289	0	0	0	-0.82687	0	0	0	0	0	0	0	0	0	0	0	-0.86378	0	0	0	-0.83897	0	0	0	0	0	0	0	0	0	0	0	0	0	0	0	0	0	0
P11940	0	0	0	-0.80957	0	-0.81796	-0.88796	-0.88976	-0.81102	-0.84393	-0.82944	-0.81862	-0.83945	-0.81764	-0.83549	-0.88726	-0.85238	0	0	0	0	0	0	0	0	0	-0.80442	0	0	0	0	0	0	0	0	0	0	0	0	0	0	0	0	0	0	0	0	0	0
Q9UBQ0	0	0	0	-0.81767	0	-0.81466	-0.89308	-0.88721	-0.83637	-0.83618	-0.83574	-0.81572	-0.83843	-0.81037	-0.81146	-0.88401	-0.85357	0	0	0	0	0	0	0	0	0	0	0	0	0	0	0	0	0	0	0	0	0	0	0	0	0	0	0	0	0	0	0	0
P40227	0	0	0	0	0	-0.84364	-0.90601	-0.90495	-0.83338	-0.85841	-0.83305	-0.80887	-0.83022	-0.81972	-0.84044	-0.91581	-0.871	0	0	0	0	0	0	0	0	0	0	0	0	0	0	0	0	0	0	0	0	0	0	0	0	0	0	0	0	0	0	0	0
P14678	-0.81005	0	0	-0.81801	0	-0.84071	-0.92149	-0.92805	-0.84259	-0.88457	-0.84731	-0.84446	-0.85524	-0.85547	-0.8664	-0.91916	-0.88548	0	0	0	0	0	0	0	0	0	0	0	0	0	0	0	0	0	0	0	0	0	0	0	0	0	0	0	0	0	0	0	0
P78527	0	0	0	0	0	-0.81258	-0.91691	-0.9198	-0.83595	-0.8624	-0.82005	-0.82945	-0.82518	-0.82224	-0.84221	-0.91432	-0.88134	-0.80179	0	0	0	0	0	0	0	0	0	0	0	0	0	0	0	0	0	0	0	0	0	0	0	0	0	0	0	0	0	0	0
P49588	0	0	0	0	0	0	-0.88791	-0.88889	-0.81618	-0.84462	-0.82291	0	-0.82152	-0.81113	-0.86107	-0.88129	-0.84984	0	0	0	0	0	0	0	0	0	0	0	0	0	0	0	0	0	0	0	0	0	0	0	0	0	0	0	0	0	0	0	0
P17980	0	0	0	0	0	-0.81739	-0.88924	-0.8978	-0.82041	-0.85362	-0.82986	-0.80872	-0.83884	-0.83185	-0.82941	-0.88267	-0.8754	0	0	0	0	0	0	0	0	0	0	0	0	0	0	0	0	0	0	0	0	0	0	0	0	0	0	0	0	0	0	0	0
P62847	0	0	0	0	0	-0.83113	-0.87969	-0.88044	-0.82703	-0.83152	-0.82164	0	-0.80097	0	0	-0.87562	-0.85839	0	0	0	0	0	0	0	0	0	-0.80874	0	0	0	0	0	0	0	0	0	0	0	0	0	0	0	0	0	0	0	0	0	0
P43243	0	0	0	0	0	-0.82805	-0.82167	-0.82296	0	0	0	0	0	0	0	-0.80773	0	0	0	0	0	0	0	0	0	0	-0.81235	0	0	0	0	0	0	0	0	0	0	0	0	0	0	0	0	0	0	0	0	0	0
P43686	0	0	0	0	0	-0.81667	-0.85056	-0.85161	0	-0.80535	0	0	0	0	-0.81489	-0.86673	-0.81988	0	0	0	0	0	0	0	0	0	-0.82184	0	0	0	0	0	0	0	0	0	0	0	0	0	0	0	0	0	0	0	0	0	0
Q96AE4	0	0	0	0	0	-0.83284	-0.84969	-0.85581	0	-0.81384	-0.80104	0	0	0	-0.84181	-0.85642	-0.81461	0	0	0	0	0	0	0	0	0	-0.843	0	0	0	0	0	0	0	0	0	0	0	0	0	0	0	0	0	0	0	0	0	0
P62995	-0.80199	0	0	-0.82813	0	-0.82458	-0.88053	-0.88821	-0.82833	-0.85121	-0.84584	-0.8146	-0.81879	-0.81874	-0.83627	-0.88017	-0.85029	0	0	0	0	0	0	0	0	0	-0.81072	0	0	-0.80841	0	0	0	0	0	0	0	0	0	0	0	0	0	0	0	0	0	0	0
Q05519	0	0	0	-0.82411	0	-0.84272	-0.8655	-0.86392	-0.80013	-0.83018	-0.82608	0	-0.8234	-0.80298	0	-0.87387	-0.8427	0	0	0	0	0	0	0	0	0	-0.81814	0	0	0	0	0	0	0	0	0	0	0	0	0	0	0	0	0	0	0	0	0	0
Q92544	0	0	0	0	0	-0.80531	-0.85594	-0.85744	0	-0.82146	-0.81037	0	-0.81073	0	0	-0.84882	-0.83783	0	0	0	0	0	0	0	0	0	0	0	0	0	0	0	0	0	0	0	0	0	0	0	0	0	0	0	0	0	0	0	0
Q9BTT0	0	0	0	0	0	-0.81199	-0.87072	-0.87782	0	-0.84119	-0.80993	0	-0.81301	-0.81314	-0.81104	-0.89376	-0.8697	0	0	0	0	0	0	0	0	0	-0.80015	0	0	0	0	0	0	0	0	0	0	0	0	0	0	0	0	0	0	0	0	0	0
Q9NR30	0	0	0	-0.81949	0	-0.82632	-0.90692	-0.91087	-0.85951	-0.86655	-0.84745	-0.84131	-0.84862	-0.85348	0	-0.91026	-0.89533	-0.84734	-0.81928	0	0	0	0	0	0	0	0	0	0	0	0	0	0	0	0	0	0	0	0	0	0	0	0	0	0	0	0	0	0
Q9NS69	0	-0.81673	0	-0.82717	0	-0.80299	-0.87074	-0.85474	-0.82992	-0.82234	-0.8255	0	-0.83818	-0.81477	0	-0.85089	-0.80251	0	0	0	0	0	0	0	0	-0.80084	0	0	0	0	-0.85716	0	0	0	0	0	0	0	0	0	0	0	0	0	0	0	0	0	0
O14936	0	0	0	-0.83217	-0.80436	-0.80866	-0.85918	-0.85073	-0.82652	-0.8282	-0.8381	-0.80594	-0.86507	-0.83041	0	-0.81529	-0.81945	0	0	0	0	0	0	0	0	0	0	0	0	0	0	0	0	0	0	0	0	0	0	0	0	0	0	0	0	0	0	0	0
P61353	0	0	0	0	0	0	-0.85898	-0.85951	-0.8127	-0.82018	-0.82221	0	-0.83256	-0.80845	0	-0.84638	-0.85371	0	0	0	0	0	0	0	0	0	0	0	0	0	0	0	0	0	0	0	0	0	0	0	0	0	0	0	0	0	0	0	0
Q9NYU2	0	0	0	-0.80465	0	-0.81776	-0.85509	-0.85526	0	-0.83971	-0.83527	0	-0.86546	-0.8362	0	-0.83288	-0.82138	0	0	0	0	0	0	0	0	0	0	0	0	0	0	0	0	0	0	0	0	0	0	0	0	0	0	0	0	0	0	0	0
P61019	0	-0.85544	-0.80674	-0.85871	-0.80201	-0.85156	-0.89176	-0.89541	-0.84288	-0.89593	-0.89742	-0.84566	-0.91758	-0.90327	-0.87082	-0.8663	-0.84672	0	0	0	0	0	0	0	0	0	-0.8589	0	-0.82125	0	-0.80425	0	0	0	0	-0.82841	0	0	0	0	-0.80758	0	0	0	0	0	0	0	0
Q86VP6	0	-0.80117	0	-0.8787	0	-0.8398	-0.91599	-0.91647	-0.86592	-0.87806	-0.8745	-0.87037	-0.82242	-0.83371	-0.85556	-0.9072	-0.86121	0	0	0	0	0	0	-0.82355	0	0	-0.88872	0	-0.83488	-0.81032	0	0	0	0	0	0	0	0	0	0	0	0	0	0	0	0	0	0	0
P67809	0	0	0	0	0	-0.84618	-0.89555	-0.89705	-0.82902	-0.86009	-0.84506	-0.84188	-0.88253	-0.84805	0	-0.88614	-0.87833	0	0	0	0	0	0	0	0	0	0	0	0	0	0	0	0	0	0	0	0	0	0	0	0	0	0	0	0	0	0	0	0
Q01105	0	0	0	0	0	-0.8525	-0.8749	-0.87845	-0.80785	-0.83643	-0.82545	-0.82994	-0.84204	-0.81678	-0.83064	-0.85767	-0.82844	0	0	0	0	0	0	0	0	0	-0.81992	0	0	0	0	0	0	0	0	0	0	0	0	0	0	0	0	0	0	0	0	0	0
Q96EP5	0	0	0	0	0	-0.88258	-0.85234	-0.85779	0	-0.82953	-0.81784	-0.82021	-0.83558	-0.80051	-0.83158	-0.82174	-0.80084	0	0	0	0	0	0	0	0	0	0	0	0	0	0	0	0	0	0	0	0	0	0	0	0	0	0	0	0	0	0	0	0
P11387	0	0	0	0	0	-0.83312	-0.83638	-0.85274	0	-0.81091	0	0	0	0	-0.82373	-0.84616	-0.82549	0	0	0	0	0	0	0	0	0	0	0	0	0	0	0	0	0	0	0	0	0	0	0	0	0	0	0	0	0	0	0	0
P11233	0	0	0	0	0	-0.81579	-0.86312	-0.88275	0	-0.84297	-0.80658	0	0	0	-0.92509	-0.86922	-0.81258	0	0	0	0	0	0	0	0	0	-0.83535	0	0	0	0	0	0	0	0	0	0	0	0	0	0	0	0	0	0	0	0	0	0
Q9UK76	0	0	0	0	0	-0.87547	-0.84274	-0.84841	0	-0.80615	0	0	0	0	-0.84639	-0.8146	0	0	0	0	0	0	0	0	0	0	0	0	0	0	0	0	0	0	0	0	0	0	0	0	0	0	0	0	0	0	0	0	0
P20700	0	0	0	0	-0.80846	-0.86102	-0.87785	-0.87885	-0.83848	-0.86857	-0.86129	-0.81431	-0.86637	-0.85444	-0.83101	-0.85258	-0.83416	0	0	0	0	0	0	0	0	0	-0.8173	0	0	0	0	0	0	0	0	0	0	0	0	0	0	0	0	0	0	0	0	0	0
P62280	0	0	0	0	-0.83225	-0.89457	-0.88109	-0.872	-0.854	-0.86598	-0.85765	-0.80351	-0.86838	-0.84351	0	-0.83787	-0.82595	0	0	0	0	0	0	0	0	0	0	0	0	0	0	0	0	0	0	0	0	0	0	0	0	0	0	0	0	0	0	0	0
P28062	0	0	0	0	0	0	0	0	0	0	0	0	0	0	-0.8204	0	0	0	0	0	0	0	0	0	0	0	-0.81987	0	0	0	0	0	0	0	0	0	0	0	0	0	0	0	0	0	0	0	0	0	0
P49207	0	0	0	0	0	-0.84678	0	0	0	0	0	0	0	0	0	0	0	0	0	0	0	0	0	0	0	0	0	0	0	0	0	0	0	0	0	0	0	0	0	0	0	0	0	0	0	0	0	0	0
P26373	0	0	0	0	0	-0.8295	0	0	0	0	0	0	0	0	0	0	0	0	0	0	0	0	0	0	0	0	-0.82064	0	0	0	0	0	0	0	0	0	0	0	0	0	0	0	0	0	0	0	0	0	0
P35998	0	0	0	0	0	-0.80914	0	0	0	0	0	0	0	0	0	0	0	0	0	0	0	0	0	0	0	0	-0.804	0	0	0	0	0	0	0	0	0	0	0	0	0	0	0	0	0	0	0	0	0	0
P62701	0	0	0	0	0	-0.83168	-0.83721	-0.82873	0	0	0	0	0	0	0	-0.80761	0	0	0	0	0	0	0	0	0	0	0	0	0	0	0	0	0	0	0	0	0	0	0	0	0	0	0	0	0	0	0	0	0
P62241	0	0	0	0	0	-0.87037	-0.8728	-0.86041	-0.8255	-0.81688	-0.80452	0	-0.80262	0	0	-0.85325	-0.81962	0	0	0	0	0	0	0	0	0	0	0	0	0	0	0	0	0	0	0	0	0	0	0	0	0	0	0	0	0	0	0	0
P62424	0	0	0	0	0	-0.83687	-0.86622	-0.85441	-0.81827	-0.81958	-0.81273	0	-0.82222	0	0	-0.84456	-0.80762	0	0	0	0	0	0	0	0	0	0	0	0	0	0	0	0	0	0	0	0	0	0	0	0	0	0	0	0	0	0	0	0
Q9NVS9	0	-0.84391	0	0	0	0	0	0	0	0	0	0	-0.81231	0	0	0	0	0	0	0	0	0	0	0	0	0	0	0	0	0	-0.83734	0	0	0	0	0	0	0	0	0	0	0	0	0	0	0	0	0	0
O00584	0	-0.81353	0	-0.84119	-0.81059	-0.84087	-0.84172	-0.81534	-0.80491	-0.81236	-0.83214	-0.83261	-0.88324	-0.80757	0	0	0	0	0	0	0	0	0	0	0	-0.8064	0	0	-0.80098	0	0	0	0	0	0	0	0	0	0	0	0	0	0	0	0	0	0	0	0
P22307	0	-0.84185	0	-0.82785	-0.81625	-0.86428	-0.82834	-0.80203	-0.80978	0	-0.82666	0	-0.85036	0	0	0	0	0	0	0	0	0	0	0	0	0	-0.81432	0	0	0	-0.84105	0	0	0	0	0	0	0	0	0	0	0	0	0	0	0	0	0	0
P62263	0	-0.83799	0	-0.84229	-0.85846	-0.86464	-0.87817	-0.86847	-0.84972	-0.85766	-0.87835	-0.84879	-0.8887	-0.84738	-0.81332	-0.82172	-0.80226	0	0	0	0	0	0	0	0	0	-0.83542	0	0	0	0	0	0	0	0	0	0	0	0	0	0	0	0	0	0	0	0	0	0
P61981	0	0	0	0	0	0	-0.87231	-0.88254	-0.81921	-0.84994	-0.80331	0	0	-0.82257	-0.80738	-0.87792	-0.87832	-0.81034	0	0	0	0	0	0	0	0	0	0	0	0	0	0	0	0	0	0	0	0	0	0	0	0	0	0	0	0	0	0	0
O75643	0	0	0	0	0	0	-0.868	-0.8585	0	-0.83402	-0.80762	0	-0.80371	0	-0.81415	-0.89481	-0.83714	0	0	0	0	0	0	0	0	0	0	0	0	0	0	0	0	0	0	0	0	0	0	0	0	0	0	0	0	0	0	0	0
Q8TCT9	0	0	0	0	0	0	-0.83071	-0.81848	0	0	0	0	0	0	0	-0.83115	0	0	0	0	0	0	0	0	0	0	0	0	0	0	-0.80345	0	0	0	0	0	0	0	0	0	0	0	0	0	0	0	0	0	0
P26368	0	0	0	-0.80916	0	-0.86075	-0.88557	-0.88207	-0.82387	-0.84105	-0.82192	0	-0.80549	-0.80645	-0.83997	-0.88042	-0.8356	0	0	0	0	0	0	0	0	0	-0.84049	0	0	0	0	0	0	0	0	0	0	0	0	0	0	0	0	0	0	0	0	0	0
Q15366	0	0	0	-0.80127	0	-0.87335	-0.87122	-0.87654	-0.83108	-0.81857	-0.80812	0	0	0	-0.84386	-0.84096	-0.80863	0	0	0	0	0	0	0	0	0	-0.83164	0	0	0	0	0	0	0	0	0	0	0	0	0	0	0	0	0	0	0	0	0	0
P26196	-0.82216	0	0	0	0	-0.81549	-0.91532	-0.92329	-0.84485	-0.86337	-0.82355	-0.81851	0	-0.8129	-0.9044	-0.91063	-0.86566	0	0	0	0	0	0	0	0	0	0	0	0	0	0	0	0	0	0	0	0	0	0	0	0	0	0	0	0	0	0	0	0
P46777	0	0	0	0	0	-0.86841	-0.9105	-0.91113	-0.83342	-0.85608	-0.80622	0	0	0	-0.81607	-0.91294	-0.88105	0	0	0	0	0	0	0	0	0	0	0	0	0	0	0	0	0	0	0	0	0	0	0	0	0	0	0	0	0	0	0	0
P62195	0	0	0	0	0	-0.85153	-0.90743	-0.91646	-0.82705	-0.87359	-0.81577	0	-0.81377	-0.82941	-0.85304	-0.90431	-0.88069	0	0	0	0	0	0	0	0	0	0	0	0	0	0	0	0	0	0	0	0	0	0	0	0	0	0	0	0	0	0	0	0
P43487	-0.83408	-0.80168	0	0	0	-0.82783	-0.92754	-0.92623	-0.84643	-0.89533	-0.86448	-0.84815	-0.88671	-0.87152	-0.87539	-0.93442	-0.89893	0	0	0	0	0	0	0	0	0	0	0	0	0	0	0	0	0	0	0	0	0	0	0	0	0	0	0	0	0	0	0	0
P50991	-0.82601	0	0	-0.80414	-0.80592	-0.81403	-0.96213	-0.96428	-0.90392	-0.92654	-0.89952	-0.88223	-0.88149	-0.88982	-0.89982	-0.96571	-0.95043	0	0	0	0	0	0	-0.80729	0	0	0	0	0	0	0	0	0	0	0	0	0	0	0	0	0	0	0	0	0	0	0	0	0
P52907	0	0	0	0	0	-0.80462	-0.92459	-0.93303	-0.87011	-0.91596	-0.87394	-0.81799	-0.86917	-0.89771	-0.86874	-0.92845	-0.9124	0	0	0	-0.83296	0	-0.82433	0	0	0	0	0	0	0	0	0	0	0	0	0	0	0	0	0	0	0	0	0	0	0	0	0	0
P05198	-0.81961	0	0	-0.82229	0	-0.89854	-0.93424	-0.93523	-0.88565	-0.91702	-0.88342	-0.80721	-0.85568	-0.88079	-0.88423	-0.92938	-0.89549	0	0	0	0	0	0	0	0	0	-0.80201	0	0	0	0	0	0	0	0	0	0	0	0	0	0	0	0	0	0	0	0	0	0
P62318	-0.82601	0	0	-0.81053	0	-0.87254	-0.94553	-0.9436	-0.88543	-0.90871	-0.87091	-0.81712	-0.84515	-0.86448	-0.87108	-0.95414	-0.91813	0	0	0	0	0	0	0	0	0	0	0	0	0	0	0	0	0	0	0	0	0	0	0	0	0	0	0	0	0	0	0	0
P54577	-0.80822	0	0	-0.82267	-0.85255	-0.86036	-0.96615	-0.96479	-0.92343	-0.92792	-0.89809	-0.8768	-0.87988	-0.886	-0.86792	-0.9412	-0.9336	-0.83764	-0.80455	0	-0.80147	0	0	0	0	0	0	0	0	0	0	0	0	0	0	0	0	0	0	0	0	0	0	0	0	0	0	0	0
Q13247	-0.85683	-0.85337	-0.80534	-0.85539	-0.85885	-0.86959	-0.96123	-0.95851	-0.91995	-0.94079	-0.91655	-0.88623	-0.92012	-0.92447	-0.89384	-0.92776	-0.90764	-0.81188	-0.83547	0	-0.82892	0	-0.81545	-0.81316	0	0	0	0	0	0	0	0	0	0	0	0	0	0	0	0	0	0	0	0	0	0	0	0	0
Q9NY33	-0.81945	-0.81519	0	-0.86513	-0.83007	0	-0.89626	-0.90637	-0.86047	-0.9052	-0.88739	-0.89988	-0.93	-0.93329	-0.81323	-0.85025	-0.86021	-0.81653	-0.86189	-0.88777	-0.85514	-0.81834	-0.84978	0	-0.84483	-0.84917	0	0	-0.82201	0	0	0	-0.85102	0	-0.80337	-0.88446	-0.83102	0	-0.80711	0	0	0	0	0	0	0	0	0	0
Q14203	0	0	0	-0.81464	-0.80335	0	-0.90539	-0.90734	-0.86152	-0.87735	-0.84893	-0.8434	-0.82982	-0.84626	0	-0.87386	-0.8739	0	0	0	0	0	0	0	0	0	0	0	0	0	0	0	0	0	0	0	0	0	0	0	0	0	0	0	0	0	0	0	0
Q9Y570	0	0	0	0	0	0	-0.83479	-0.82713	-0.81482	-0.80697	-0.81675	0	-0.83903	-0.81397	0	0	-0.80667	0	0	0	0	0	0	0	0	0	0	0	0	0	0	0	0	0	0	0	0	0	0	0	0	0	0	0	0	0	0	0	0
P30085	0	-0.83886	0	-0.8438	-0.84498	-0.8209	-0.84007	-0.8195	-0.85095	-0.80223	-0.85816	-0.80225	-0.85036	-0.80092	0	0	0	0	0	0	0	0	0	0	0	0	-0.80816	0	0	0	-0.86822	0	0	0	0	0	0	0	0	0	0	0	0	0	0	0	0	0	0
Q13547	0	-0.8081	0	-0.83749	0	-0.84354	-0.86673	-0.85907	-0.85423	-0.85382	-0.8748	0	-0.82832	-0.83048	-0.80053	-0.86146	-0.82662	0	0	0	0	0	0	0	0	0	-0.85293	0	0	0	-0.84541	0	0	0	0	0	0	0	0	0	0	0	0	0	0	0	0	0	0
P47897	0	-0.86787	0	-0.91742	-0.89031	-0.8093	-0.89887	-0.88502	-0.89534	-0.85608	-0.88928	-0.89024	-0.86298	-0.83955	0	-0.83472	-0.81913	0	-0.80547	-0.87793	0	0	0	-0.83934	-0.87884	-0.87144	-0.80307	0	-0.8145	0	-0.8486	0	0	0	0	0	-0.82846	0	0	0	0	0	0	0	0	0	0	0	0
Q01085	0	-0.82607	0	-0.86533	-0.84276	0	-0.86366	-0.85499	-0.8645	-0.83556	-0.87504	-0.84506	-0.8511	-0.83679	0	-0.83252	-0.81918	0	0	-0.87511	-0.80943	0	0	0	-0.83124	-0.83012	-0.80722	0	0	0	-0.88445	0	0	0	0	0	-0.81868	0	0	0	0	0	0	0	0	0	0	0	0
P10515	-0.87743	-0.81334	0	-0.91504	-0.87465	0	-0.90432	-0.91716	-0.90458	-0.90343	-0.90062	-0.89571	-0.80647	-0.86487	-0.88159	-0.84948	-0.82526	-0.81336	-0.88137	-0.91675	-0.90831	-0.85674	-0.86806	-0.88429	-0.88311	-0.86377	0	-0.83442	0	-0.81362	0	-0.81205	-0.87933	0	-0.81357	0	0	0	0	0	0	0	0	0	0	0	0	0	0
P61086	-0.88643	-0.84989	-0.80989	-0.89457	-0.88956	0	-0.90469	-0.90696	-0.90554	-0.89346	-0.89701	-0.87794	-0.81648	-0.86153	-0.88792	-0.8525	-0.80867	-0.8048	-0.88225	-0.90457	-0.91115	-0.84177	-0.89007	-0.86776	-0.87093	-0.85727	0	-0.8067	0	-0.82854	-0.86933	0	-0.84535	0	0	0	0	-0.80376	0	0	0	0	0	0	0	0	0	0	0
P16435	-0.84943	0	0	-0.84188	-0.86087	-0.83646	-0.93729	-0.953	-0.92776	-0.94211	-0.91138	-0.89306	-0.83927	-0.90062	-0.88833	-0.90522	-0.89526	-0.83935	-0.86749	-0.82798	-0.90768	-0.85017	-0.87192	-0.84309	-0.80181	0	0	0	0	0	0	0	-0.80238	0	0	0	0	0	-0.81949	0	0	0	0	0	0	0	0	0	0
Q8WUM0	-0.81326	0	0	-0.85417	-0.86088	0	-0.90756	-0.92906	-0.90636	-0.91811	-0.89313	-0.89896	-0.83846	-0.90676	-0.8486	-0.86599	-0.87146	-0.84043	-0.87495	-0.91317	-0.91419	-0.86907	-0.8628	-0.81199	-0.82504	-0.82245	0	0	0	0	0	0	-0.89226	0	-0.80534	0	0	0	-0.80752	0	0	0	0	0	0	0	0	0	0
Q96RS6	-0.91637	-0.84847	0	-0.8535	-0.83634	0	-0.93088	-0.93099	-0.9084	-0.91556	-0.91853	-0.91803	-0.90473	-0.90958	-0.85498	-0.91104	-0.91504	-0.91207	-0.86905	-0.84433	-0.85009	-0.83311	-0.83981	-0.87354	-0.88128	0	0	0	0	-0.85051	0	-0.88502	-0.80939	0	-0.82005	-0.8302	-0.84421	-0.8125	-0.85421	-0.84097	0	0	0	0	0	0	0	0	0
Q9BXP5	-0.86422	-0.84557	-0.81397	-0.88829	-0.86205	-0.83331	-0.89527	-0.89923	-0.91965	-0.91946	-0.9481	-0.86993	-0.88938	-0.91779	-0.84316	-0.86039	-0.86296	0	-0.81648	-0.85501	-0.87621	-0.81945	-0.84508	-0.84923	-0.81101	-0.80162	-0.81713	0	-0.81689	-0.84606	-0.84183	0	0	0	-0.87033	-0.83749	-0.85343	-0.81676	0	0	0	0	0	0	0	0	0	0	0
P27635	0	0	0	-0.84361	-0.84972	-0.81481	-0.88626	-0.8874	-0.89958	-0.86138	-0.87123	-0.80529	0	-0.8151	0	-0.84777	-0.85561	-0.83663	-0.80081	-0.82692	-0.80989	0	0	0	-0.80037	0	0	0	0	0	0	0	0	0	0	0	0	0	0	0	0	0	0	0	0	0	0	0	0
Q15056	-0.81431	-0.84898	0	-0.89052	-0.84754	0	-0.84228	-0.84429	-0.85207	-0.82143	-0.86887	-0.8444	-0.82289	-0.81368	0	0	0	-0.83279	-0.80735	-0.88264	0	0	0	-0.81431	-0.87873	-0.80908	0	0	0	0	0	0	-0.81939	0	-0.82462	-0.81641	-0.90027	0	0	0	-0.80763	0	0	0	0	0	0	0	0
O43660	-0.81986	0	0	-0.81367	-0.81606	0	-0.89065	-0.8831	-0.84458	-0.83268	-0.81946	-0.83063	0	0	-0.80033	-0.84478	-0.83671	-0.86414	-0.82223	0	0	0	0	-0.81928	-0.87613	0	0	0	0	0	0	0	0	0	0	0	0	0	0	0	0	0	0	0	0	0	0	0	0
Q7L014	-0.87301	-0.83048	-0.80445	-0.86648	0	0	-0.91307	-0.90182	-0.86492	-0.8477	-0.84615	-0.84991	0	0	-0.83246	-0.8817	-0.84999	-0.84112	-0.80864	0	0	0	0	-0.86261	-0.86176	0	0	0	0	0	0	0	0	0	0	0	0	0	0	0	0	0	0	0	0	0	0	0	0
P42704	-0.90118	-0.8361	0	-0.89815	-0.81485	-0.82883	-0.90812	-0.91202	-0.86093	-0.88116	-0.86284	-0.90725	-0.85386	-0.85377	-0.8508	-0.85257	-0.82372	-0.85436	-0.91557	-0.81435	-0.81138	0	-0.81079	-0.86106	-0.8781	-0.83994	0	0	0	-0.83828	0	-0.86373	-0.80444	0	0	0	0	0	0	0	0	0	0	0	0	0	0	0	0
Q9H307	-0.94173	-0.84403	-0.84593	-0.90599	-0.83493	0	-0.96402	-0.96942	-0.92793	-0.94322	-0.9183	-0.91326	-0.83929	-0.89204	-0.92544	-0.94213	-0.90816	-0.84894	-0.8723	-0.85867	-0.8853	-0.83386	-0.84679	-0.91356	-0.87432	-0.82632	0	0	0	-0.83422	0	-0.83822	-0.8217	-0.84093	0	0	0	0	0	0	0	0	0	0	0	0	0	0	0
O95573	-0.95028	-0.90461	-0.85238	-0.90961	-0.83732	0	-0.91251	-0.91847	-0.87849	-0.89649	-0.89373	-0.88657	-0.84962	-0.87011	-0.92843	-0.86169	-0.83694	-0.83958	-0.88894	-0.85856	-0.82481	-0.85326	-0.81532	-0.88467	-0.89116	-0.82528	0	0	0	-0.83049	0	-0.82551	-0.82992	-0.84887	0	-0.82784	-0.8264	0	-0.81368	-0.87442	-0.83616	-0.81912	0	0	0	0	0	0	0
Q9Y2L1	-0.96041	-0.90976	-0.86378	-0.92466	-0.82562	-0.80711	-0.91955	-0.92097	-0.87895	-0.89807	-0.88874	-0.88673	-0.85036	-0.86807	-0.91321	-0.8683	-0.83129	-0.83848	-0.9067	-0.84685	-0.82612	-0.81767	-0.81743	-0.88875	-0.89324	-0.8524	0	0	0	-0.84046	0	-0.83392	-0.8174	-0.84524	0	-0.80922	-0.80524	0	0	-0.84964	-0.80011	-0.83657	0	0	0	0	0	0	0
P62266	0	0	0	0	0	0	-0.83613	-0.84662	0	0	0	0	0	0	0	0	0	-0.80943	0	0	0	0	0	0	0	0	0	0	0	0	0	0	0	0	0	0	0	0	0	0	0	0	0	0	0	0	0	0	0
P62633	0	0	0	-0.82647	-0.80919	0	-0.8538	-0.84384	-0.84698	0	0	-0.81345	0	0	0	0	0	-0.87996	-0.84236	0	0	0	0	0	-0.82591	0	0	-0.81799	0	0	0	0	0	0	0	0	0	0	0	0	0	0	0	0	0	0	0	0	0
P30084	-0.80436	0	0	-0.86749	0	0	-0.83693	-0.84046	-0.80029	0	0	-0.8242	0	0	0	0	0	-0.81017	-0.88757	-0.80474	0	0	0	0	-0.82519	-0.84084	0	-0.87784	0	0	0	0	0	0	0	0	0	0	0	0	0	0	0	0	0	0	0	0	0
Q8WUM4	0	0	0	-0.83866	-0.81041	0	-0.82676	-0.81891	-0.80182	0	0	-0.80591	0	0	0	0	0	0	0	0	0	0	0	0	0	0	0	-0.84006	0	0	0	0	0	0	0	0	0	0	0	0	0	0	0	0	0	0	0	0	0
Q96TA1	0	0	0	-0.84317	-0.82513	-0.83414	-0.83386	-0.83477	-0.80913	0	0	-0.81757	0	0	0	0	0	0	0	0	0	0	0	0	0	0	0	-0.82386	0	0	0	0	0	0	0	0	0	0	0	0	0	0	0	0	0	0	0	0	0
Q16836	0	-0.81686	0	-0.87545	0	-0.86814	-0.83415	0	-0.8124	0	0	0	0	0	0	0	0	0	-0.80596	0	0	0	0	0	0	-0.84718	0	0	0	0	0	0	0	0	0	0	0	0	0	0	0	0	-0.82206	0	0	0	0	0	0
P48047	0	-0.86417	0	-0.89819	-0.88027	-0.81723	-0.83958	-0.8211	-0.83237	0	-0.80067	-0.80901	0	0	0	0	0	0	-0.83201	-0.8169	0	0	0	-0.81463	-0.87106	-0.87421	0	0	0	0	0	0	0	0	0	0	0	0	0	0	0	0	0	0	0	0	0	0	0
P55327	0	-0.83335	0	-0.8626	-0.87902	0	-0.84569	-0.83309	-0.82426	0	0	-0.83156	0	0	0	0	0	0	0	0	0	0	0	-0.80473	-0.83711	-0.81365	0	0	0	0	0	0	0	0	0	0	0	0	0	0	0	0	0	0	0	0	0	0	0
P09525	-0.83617	0	0	-0.80539	0	0	-0.83731	-0.85205	0	-0.80837	0	0	0	0	-0.91223	0	0	0	-0.82293	0	0	0	0	0	0	0	0	0	0	0	0	0	0	0	0	0	0	0	0	0	0	0	0	0	0	0	0	0	0
P09211	-0.80975	0	0	0	0	0	-0.82877	-0.83985	0	0	0	0	0	0	-0.89625	0	0	0	-0.80322	0	0	0	0	0	0	0	0	0	0	0	0	0	0	0	0	0	0	0	0	0	0	0	0	0	0	0	0	0	0
P22314	0	0	0	0	0	0	0	0	0	0	0	0	0	0	-0.80862	0	0	0	0	0	0	0	0	0	0	0	0	0	0	0	0	0	0	0	0	0	0	0	0	0	0	0	0	0	0	0	0	0	0
Q08379	0	0	0	0	0	0	-0.8047	-0.82797	0	0	0	0	0	0	-0.87784	0	0	0	0	0	0	0	0	0	0	0	0	0	0	0	0	0	0	0	0	0	0	0	0	0	0	0	0	0	0	0	0	0	0
P21964	0	0	0	0	0	-0.83413	-0.87316	-0.88114	-0.81515	-0.81787	0	-0.81789	0	0	0	-0.83916	-0.80522	-0.83006	-0.85218	0	0	0	0	0	0	0	0	0	0	0	0	0	0	0	0	0	0	0	0	0	0	0	0	0	0	0	0	0	0
Q92804	0	0	0	-0.8319	0	-0.81385	-0.84776	-0.85919	-0.80251	0	0	-0.82632	0	0	0	0	0	-0.80238	-0.81531	0	0	0	0	0	0	0	0	0	0	0	0	0	0	0	0	0	0	0	0	0	0	0	0	0	0	0	0	0	0
Q15691	0	0	0	0	0	0	0	0	0	0	0	0	0	0	0	0	0	-0.86846	0	0	0	0	0	0	0	0	0	0	0	0	0	0	0	0	0	0	0	0	0	0	0	0	0	0	0	0	0	0	0
Q9UEW8	0	0	0	0	0	0	0	0	0	0	0	0	0	0	0	0	0	0	-0.83769	0	0	0	0	0	0	0	0	0	0	0	0	0	0	0	0	0	0	0	0	0	0	0	0	0	0	0	0	0	0
P36776	-0.86835	-0.8277	0	-0.8858	0	0	-0.82661	-0.80094	-0.80202	0	0	0	0	0	0	0	0	0	-0.87836	0	0	0	0	-0.81455	-0.84153	-0.86802	0	0	0	-0.83799	0	-0.83159	0	0	0	0	0	0	0	0	0	-0.82315	-0.82979	0	0	0	0	0	0
Q96BW5	0	0	0	0	-0.82024	0	0	0	0	0	0	0	0	0	0	0	0	0	-0.81461	0	0	0	0	0	0	0	0	0	0	0	0	0	0	0	0	0	0	0	0	0	0	0	0	0	0	0	0	0	0
P62330	0	0	0	0	0	-0.82135	0	0	0	0	0	0	0	0	0	0	0	0	0	0	0	0	0	0	0	0	-0.86241	0	0	0	0	0	0	0	0	0	0	0	0	0	0	0	0	0	0	0	0	0	0
O75531	0	0	0	0	0	-0.80163	-0.81003	-0.81848	0	0	0	0	0	0	0	-0.82599	0	0	0	0	0	0	0	0	0	0	-0.81898	0	0	0	0	0	0	0	0	0	0	0	0	0	0	0	0	0	0	0	0	0	0
Q641Q2	0	0	0	0	0	-0.84363	0	0	0	0	0	0	0	0	0	0	0	0	0	0	0	0	0	0	0	0	-0.86625	0	0	0	0	0	0	0	0	0	0	0	0	0	0	0	0	0	0	0	0	0	0
P62760	-0.81323	0	0	0	0	0	-0.83476	-0.84619	0	0	0	0	0	0	-0.87023	-0.84218	-0.8142	0	0	0	0	0	0	0	0	0	0	0	0	0	0	0	0	0	0	0	0	0	0	0	0	0	0	0	0	0	0	0	0
Q15061	0	0	0	0	0	-0.81829	-0.85743	-0.86993	-0.83166	0	0	0	0	0	0	-0.87272	-0.85104	-0.80933	0	0	0	0	0	0	0	0	-0.81168	0	0	0	0	0	0	0	0	0	0	0	0	0	0	0	0	0	0	0	0	0	0
O00232	-0.80943	0	0	-0.81156	0	-0.8679	-0.87327	-0.87142	0	-0.80996	0	0	0	0	-0.81344	-0.87484	-0.81814	0	0	0	0	0	0	0	0	0	0	0	0	0	0	0	0	0	0	0	0	0	0	0	0	0	0	0	0	0	0	0	0
P15170	-0.80904	0	0	-0.81403	0	-0.83904	-0.8299	-0.81151	0	0	0	0	0	0	0	-0.80938	0	0	-0.82033	0	0	0	0	0	0	0	0	0	0	0	0	0	0	0	0	0	0	0	0	0	0	0	0	0	0	0	0	0	0
Q15397	0	0	0	0	0	-0.85402	-0.81539	-0.81503	0	0	0	0	0	0	0	-0.81587	0	0	0	0	0	0	0	0	0	0	0	0	0	0	0	0	0	0	0	0	0	0	0	0	0	0	0	0	0	0	0	0	0
P32969	0	0	0	0	0	0	-0.85053	-0.85666	0	0	0	0	0	0	0	-0.83008	-0.80793	0	0	0	0	0	0	0	0	0	0	0	0	0	0	0	0	0	0	0	0	0	0	0	0	0	0	0	0	0	0	0	0
P62899	0	0	0	0	0	0	0	0	0	0	0	0	0	0	0	0	0	0	0	0	0	0	0	0	0	0	0	-0.80443	0	0	0	0	0	0	0	0	0	0	0	0	0	0	0	0	0	0	0	0	0
P78344	0	0	0	0	0	0	-0.81348	-0.81475	0	0	0	0	0	0	0	-0.80226	0	0	0	0	0	0	0	0	0	0	0	0	0	0	0	0	0	0	0	0	0	0	0	0	0	0	0	0	0	0	0	0	0
Q15233	0	0	0	0	0	0	-0.85191	-0.84463	0	0	0	0	0	0	-0.80226	-0.809	0	0	0	0	0	0	0	0	0	0	0	0	0	0	0	0	0	0	0	0	0	0	0	0	0	0	0	0	0	0	0	0	0
Q9H7Z7	0	0	0	0	0	0	0	0	0	0	0	0	0	0	0	0	0	0	0	0	0	0	0	0	0	0	0	0	0	0	0	0	0	0	0	0	0	0	0	0	0	0	-0.82702	-0.82295	-0.80633	0	0	0	0
O75347	0	-0.84277	0	-0.80764	0	0	0	0	0	0	0	0	0	0	0	0	0	0	0	0	0	0	0	0	0	0	0	0	0	0	0	0	0	0	0	0	0	0	0	0	0	-0.8001	0	0	0	0	-0.80783	0	0
P61077	0	0	0	0	0	0	0	0	0	0	0	0	0	0	0	-0.80761	0	-0.8105	0	0	0	0	0	0	0	0	0	0	0	0	0	0	0	0	0	0	0	0	0	0	0	0	0	0	0	0	0	0	0
Q15181	0	0	0	0	0	0	-0.81873	0	0	0	0	0	0	0	0	-0.81035	0	0	0	0	0	0	0	0	0	0	0	0	0	0	0	0	0	0	0	0	0	0	0	0	0	0	0	0	-0.80025	0	0	0	0
[truncated: 948 more columns]

## Sheet: p-val
Table S6. Results of the Pearson’s correlation analysis performed for DAPs and DAPs as well as clinical data of rectal cancer patients.
	Citric acid	Oleic acid	Pelargonic acid	O95425	P46821	Hexose	P07951	P09493	P08648	Q05682	Q9HBL0	P16070	P12814	Q8WX93	P10643	P17661	Q93052	P51884	Phosphoenolpyruvic	Cis-gondoic acid	Alpha-aminoadipic	P50479	Asparagine	Cytosin	Q14112	Ribitol	Glycerol	Galactose	P23219	Q13885	Alpha-Ketoglutaric	Q969E4	Lysine	Malic acid	Q9ULC3	Q16363	Q6PCB0	Aspartic acid	Squalene	Uridine	Lactobionic acid	Cadaverine	N-Acetyl-aspartic	Glycerol-3-phospha	Linoleic acid	P78559	1-Monopalmitin	Glyceric acid	Phosphoethanolamin
Citric acid	NA	1.0056e-05	8.76e-06	8.6777e-06	0.00093965	0.0017545	1.4857e-05	2.1803e-05	4.962e-05	2.4845e-05	3.6712e-05	5.6067e-05	0.00034331	9.8775e-05	4.3441e-05	9.1904e-05	0.00056998	0.00037409	1.1417e-05	0.00046352	0.00012168	0.0011038	0.00018253	4.3921e-06	3.7113e-05	0.00016099	0.004424	0.011255	0.0011248	1.5742e-05	0.0018924	5.2282e-05	0.0010544	3.6944e-05	0.0029982	0.0012242	0.001299	0.00030283	0.00088725	4.5604e-05	0.0020204	6.23e-05	0.00037565	0.0020584	0.0025837	0.00061536	0.0029818	0.019893	0.033994
Oleic acid	1.0056e-05	NA	1.0822e-06	3.4979e-07	5.1064e-05	0.00041957	0.00010133	0.00028579	8.7213e-05	0.00014188	2.0147e-05	6.4889e-05	3.0778e-05	0.00014112	0.00064366	0.0017771	0.0046229	0.0077971	0.00063937	0.00037738	0.00084282	0.0029379	0.00089013	8.2795e-06	2.3016e-05	1.5463e-05	0.0012657	0.020892	0.00019296	9.8249e-05	0.00011685	0.00191	0.0049762	2.5829e-05	0.0020814	0.00023615	7.4836e-05	0.00093554	0.0060134	7.5167e-05	0.00093562	5.9345e-06	1.7158e-05	0.0011185	0.00018947	7.9329e-05	0.00050828	0.011397	0.019908
Pelargonic acid	8.76e-06	1.0822e-06	NA	1.1395e-05	0.00056737	0.00022364	8.2962e-05	0.00021034	0.00011725	7.1279e-05	2.651e-05	0.00022234	0.00030063	0.00030232	0.00017864	0.00066387	0.0035338	0.031657	0.0048551	0.0053831	0.00099272	0.0065832	0.0012381	2.4495e-06	0.00093036	0.00053846	0.00088427	0.071216	0.00037695	1.9119e-05	0.0015304	0.007634	0.031463	2.0433e-06	0.0062969	0.003745	0.0028235	0.004781	0.017911	0.00059563	0.0055934	2.6138e-05	1.1204e-05	0.00016478	0.0002645	1.5897e-06	0.0011514	0.011825	0.016577
O95425	8.6777e-06	3.4979e-07	1.1395e-05	NA	2.2438e-05	5.0304e-05	1.1288e-05	2.8112e-05	5.8317e-06	1.8868e-05	2.6969e-06	2.6525e-06	5.3713e-05	4.9587e-05	0.00047823	0.00044917	0.0013888	0.0029602	0.0001454	4.2372e-05	0.00013592	0.0020428	0.00054798	4.7154e-07	6.7024e-06	1.4985e-07	0.00020232	0.0030034	4.3702e-06	4.3191e-05	0.00020071	0.00036834	0.0010344	0.00018561	0.00077051	0.0005561	8.1993e-05	0.0014283	0.009606	0.0021345	0.0050704	9.4125e-05	9.2605e-05	0.0079985	0.0032944	0.00097042	0.0046578	0.033041	0.087324
P46821	0.00093965	5.1064e-05	0.00056737	2.2438e-05	NA	0.00048974	2.0026e-05	3.794e-05	7.664e-07	1.7514e-05	1.5607e-06	3.3055e-06	3.514e-05	3.7092e-05	0.00055889	0.0011246	0.00096943	0.0028846	0.0010983	2.8485e-05	4.3037e-05	6.0261e-05	0.00024923	1.4129e-05	2.2211e-05	0.00026113	0.0055113	0.012295	0.00084263	0.0026381	0.00022089	0.004284	0.00075131	0.0006745	0.00035613	0.0004654	0.00013439	0.001107	0.00077298	0.0015161	0.012298	0.0066191	0.010085	0.061023	0.025386	0.014241	0.033226	0.16837	0.52367
Hexose	0.0017545	0.00041957	0.00022364	5.0304e-05	0.00048974	NA	5.3976e-05	0.00010849	7.6675e-05	0.0001165	0.00010958	0.00051666	0.00033802	0.00051536	0.001386	0.00069228	0.0020504	0.017582	0.0034835	0.015521	0.0053914	0.02229	0.010416	0.00099461	0.0085006	0.0012393	0.0006591	0.072016	0.0012111	0.0026047	0.0057141	0.039489	0.058338	0.0065719	0.031037	0.018834	0.014172	0.054884	0.051362	0.058523	0.064034	0.0069198	0.0016682	0.0069723	0.0044836	0.0092483	0.019877	0.058005	0.12325
P07951	1.4857e-05	0.00010133	8.2962e-05	1.1288e-05	2.0026e-05	5.3976e-05	NA	3.284e-13	2.0558e-09	6.9496e-10	3.0574e-08	3.8017e-07	5.4014e-06	6.9125e-07	1.0878e-05	9.0672e-09	2.0661e-07	0.00025663	0.00027274	0.00031887	2.7189e-05	0.00037277	0.00017537	4.8829e-06	0.00016494	0.0004986	0.0015294	0.013726	0.00034247	0.00030675	0.00087068	0.00094169	0.0022166	0.00023347	0.0018088	0.0019499	0.00201	0.0038761	0.00099527	0.001774	0.0099613	0.0030953	0.0027643	0.0073376	0.0087366	0.01128	0.016421	0.15429	0.20493
P09493	2.1803e-05	0.00028579	0.00021034	2.8112e-05	3.794e-05	0.00010849	3.284e-13	NA	1.7829e-08	1.934e-10	6.2188e-08	4.7073e-07	9.7702e-06	3.9481e-07	2.1047e-06	5.2136e-09	5.1665e-08	0.00024433	0.00028981	0.0002328	1.9561e-05	0.0001279	0.00013842	1.2183e-05	0.00027889	0.00089168	0.0014069	0.0096886	0.00041885	0.00045453	0.0014641	0.00098707	0.0012841	0.00033712	0.0012187	0.0014861	0.0021746	0.0036324	0.00065724	0.0022107	0.0073886	0.0064732	0.0070148	0.015888	0.020395	0.018197	0.030045	0.19476	0.2784
P08648	4.962e-05	8.7213e-05	0.00011725	5.8317e-06	7.664e-07	7.6675e-05	2.0558e-09	1.7829e-08	NA	2.2037e-08	1.6499e-09	4.2443e-07	1.5205e-05	1.9589e-06	8.3294e-05	1.8598e-06	3.371e-06	0.0002971	0.00043449	0.00012191	1.341e-05	0.00025616	0.00025521	1.9987e-06	0.00010471	0.00039009	0.0012723	0.014235	0.00026067	0.00036116	0.00019202	0.0011947	0.0017699	0.00037423	0.00058222	0.0020614	0.00077969	0.0024587	0.0014445	0.0019989	0.012207	0.0042549	0.0052396	0.017167	0.013243	0.010579	0.017553	0.20435	0.30749
Q05682	2.4845e-05	0.00014188	7.1279e-05	1.8868e-05	1.7514e-05	0.0001165	6.9496e-10	1.934e-10	2.2037e-08	NA	8.3142e-10	2.3241e-07	7.0928e-07	9.966e-10	5.2428e-06	2.3295e-07	5.9264e-07	0.0012231	0.00054535	0.00011558	1.3564e-06	5.7101e-05	1.5844e-05	3.6913e-06	0.00023713	0.00046379	0.0015687	0.024316	0.00010372	0.00031106	0.00075217	0.0014113	0.0011456	5.2787e-05	0.00028758	0.00030363	0.00090256	0.00089993	0.0004111	0.002015	0.0062157	0.0079711	0.0060545	0.021802	0.026879	0.013499	0.048323	0.25669	0.31384
Q9HBL0	3.6712e-05	2.0147e-05	2.651e-05	2.6969e-06	1.5607e-06	0.00010958	3.0574e-08	6.2188e-08	1.6499e-09	8.3142e-10	NA	9.6119e-08	3.3017e-07	1.7637e-08	2.8729e-05	3.7927e-06	4.6095e-06	0.0015637	0.001108	4.7339e-05	5.0825e-06	8.684e-05	5.5241e-05	6.4163e-07	0.00010074	0.0002587	0.00040542	0.019826	2.1979e-05	7.8016e-05	0.00012091	0.0012382	0.0015225	4.5674e-05	3.6807e-05	0.00015491	8.5847e-05	0.00072391	0.0012283	0.0011752	0.0027288	0.0040287	0.0033412	0.017299	0.013458	0.0048669	0.018558	0.20974	0.25542
P16070	5.6067e-05	6.4889e-05	0.00022234	2.6525e-06	3.3055e-06	0.00051666	3.8017e-07	4.7073e-07	4.2443e-07	2.3241e-07	9.6119e-08	NA	1.2927e-06	4.4481e-07	0.00013969	3.6963e-05	4.8073e-05	0.0010217	0.00037295	1.9107e-05	1.0228e-05	9.994e-05	6.854e-05	2.1359e-07	1.2034e-05	7.0372e-05	0.0028943	0.0077902	8.4592e-06	8.1065e-05	0.0013492	5.1039e-05	0.00030813	0.00033312	7.6073e-05	0.00014623	6.9041e-05	0.00094709	0.000931	0.0016596	0.010593	0.002441	0.0027163	0.036361	0.022888	0.014161	0.034955	0.2265	0.34827
P12814	0.00034331	3.0778e-05	0.00030063	5.3713e-05	3.514e-05	0.00033802	5.4014e-06	9.7702e-06	1.5205e-05	7.0928e-07	3.3017e-07	1.2927e-06	NA	6.3626e-09	0.00052575	9.0832e-05	7.4883e-05	0.004528	0.0017205	0.00022542	6.6518e-05	0.00055034	5.5787e-05	6.828e-05	0.00024148	0.00028499	0.0046297	0.069928	4.2805e-05	0.00048732	0.00068783	0.0020047	0.0029948	0.00021025	0.00017339	9.7332e-06	7.2028e-05	0.00067189	0.00090123	0.0026266	0.0049183	0.0078029	0.0028519	0.023995	0.013658	0.018641	0.039944	0.28557	0.22625
Q8WX93	9.8775e-05	0.00014112	0.00030232	4.9587e-05	3.7092e-05	0.00051536	6.9125e-07	3.9481e-07	1.9589e-06	9.966e-10	1.7637e-08	4.4481e-07	6.3626e-09	NA	5.496e-05	1.0866e-05	8.2742e-06	0.0026034	0.00080334	4.1697e-05	1.087e-06	4.8623e-05	4.3296e-06	2.8002e-05	0.00028817	0.00030941	0.0028055	0.037714	3.8912e-05	0.00046428	0.00045525	0.0012507	0.00065182	0.00010568	5.1765e-05	1.3103e-05	0.00022313	0.00022994	0.00027626	0.0023581	0.0034724	0.014633	0.0097989	0.049734	0.046137	0.025585	0.08431	0.39129	0.37131
P10643	4.3441e-05	0.00064366	0.00017864	0.00047823	0.00055889	0.001386	1.0878e-05	2.1047e-06	8.3294e-05	5.2428e-06	2.8729e-05	0.00013969	0.00052575	5.496e-05	NA	3.0199e-05	9.4387e-05	0.0046335	0.0017223	0.0010955	0.00028517	2.4149e-05	0.0004246	0.00020408	0.0024904	0.0069843	0.0010068	0.0075971	0.0043429	0.0010709	0.0046832	0.0078068	0.0027553	0.00020619	0.0027323	0.0015992	0.0060665	0.0051139	0.00093783	0.00057426	0.0005149	0.0080476	0.019639	0.021069	0.034907	0.0059364	0.030711	0.079336	0.22044
P17661	9.1904e-05	0.0017771	0.00066387	0.00044917	0.0011246	0.00069228	9.0672e-09	5.2136e-09	1.8598e-06	2.3295e-07	3.7927e-06	3.6963e-05	9.0832e-05	1.0866e-05	3.0199e-05	NA	8.696e-10	0.00043387	0.0019626	0.0023092	0.00020479	0.0019463	0.00076954	0.00017637	0.0027011	0.0055439	0.0020855	0.026483	0.0016726	0.0005813	0.00283	0.002306	0.0089538	0.0012491	0.0044015	0.0082194	0.01075	0.013114	0.0035105	0.0058105	0.012012	0.014242	0.010811	0.009457	0.020018	0.026488	0.027361	0.27907	0.21229
Q93052	0.00056998	0.0046229	0.0035338	0.0013888	0.00096943	0.0020504	2.0661e-07	5.1665e-08	3.371e-06	5.9264e-07	4.6095e-06	4.8073e-05	7.4883e-05	8.2742e-06	9.4387e-05	8.696e-10	NA	0.00025807	0.0042075	0.0018374	0.0003221	0.00074676	0.0013846	0.00047734	0.0033024	0.013371	0.0051982	0.03624	0.0023438	0.0027527	0.0055728	0.0034369	0.0062665	0.0023058	0.0018074	0.0054335	0.0060281	0.01227	0.0018989	0.007504	0.012357	0.039406	0.038449	0.034938	0.053478	0.07175	0.059419	0.51053	0.38643
P51884	0.00037409	0.0077971	0.031657	0.0029602	0.0028846	0.017582	0.00025663	0.00024433	0.0002971	0.0012231	0.0015637	0.0010217	0.004528	0.0026034	0.0046335	0.00043387	0.00025807	NA	1.7247e-05	0.0016492	0.0028256	0.0035707	0.0066375	0.0035634	0.00040745	0.009057	0.068448	0.0088074	0.037505	0.0097091	0.015959	0.00015596	0.00070568	0.029243	0.013686	0.016615	0.006999	0.0057402	0.0005441	0.0037603	0.031932	0.022833	0.060023	0.074137	0.050809	0.14081	0.032627	0.20961	0.34471
Phosphoenolpyruvic	1.1417e-05	0.00063937	0.0048551	0.0001454	0.0010983	0.0034835	0.00027274	0.00028981	0.00043449	0.00054535	0.001108	0.00037295	0.0017205	0.00080334	0.0017223	0.0019626	0.0042075	1.7247e-05	NA	0.00026892	0.00026653	0.0021374	0.00033701	0.00080651	3.4733e-05	9.217e-05	0.038146	0.0045425	0.011043	0.0023919	0.0055335	6.3106e-05	7.2541e-05	0.0073963	0.012759	0.0027144	0.0042833	0.00038386	0.00025459	0.0024575	0.022165	0.004007	0.0095094	0.051991	0.031111	0.041428	0.040416	0.048639	0.22064
Cis-gondoic acid	0.00046352	0.00037738	0.0053831	4.2372e-05	2.8485e-05	0.015521	0.00031887	0.0002328	0.00012191	0.00011558	4.7339e-05	1.9107e-05	0.00022542	4.1697e-05	0.0010955	0.0023092	0.0018374	0.0016492	0.00026892	NA	2.6812e-06	1.7211e-05	2.2916e-05	9.3612e-05	2.9428e-06	2.4502e-05	0.0056359	0.00049362	0.00027529	0.0024252	0.00014379	0.00020047	7.7382e-08	0.0012959	8.338e-06	1.2782e-05	1.7978e-05	2.0357e-05	0.00037562	0.0014253	0.0015118	0.015817	0.030435	0.22268	0.14156	0.045562	0.10448	0.3024	0.65358
Alpha-aminoadipic	0.00012168	0.00084282	0.00099272	0.00013592	4.3037e-05	0.0053914	2.7189e-05	1.9561e-05	1.341e-05	1.3564e-06	5.0825e-06	1.0228e-05	6.6518e-05	1.087e-06	0.00028517	0.00020479	0.0003221	0.0028256	0.00026653	2.6812e-06	NA	2.7554e-05	2.3823e-09	1.9744e-05	6.6231e-05	0.00013253	0.011528	0.0157	0.00055113	0.00082604	0.00038208	0.00056341	4.1252e-05	0.00020193	7.6315e-05	0.00012427	0.0010104	8.9395e-06	7.8521e-05	0.0028386	0.011501	0.026173	0.022226	0.12906	0.12831	0.033145	0.16702	0.3837	0.68777
P50479	0.0011038	0.0029379	0.0065832	0.0020428	6.0261e-05	0.02229	0.00037277	0.0001279	0.00025616	5.7101e-05	8.684e-05	9.994e-05	0.00055034	4.8623e-05	2.4149e-05	0.0019463	0.00074676	0.0035707	0.0021374	1.7211e-05	2.7554e-05	NA	7.3191e-05	0.00038789	0.00034965	0.0073031	0.022925	0.0091814	0.0060033	0.010989	0.006338	0.0041139	1.9062e-05	0.00055925	5.9357e-05	5.3001e-05	0.00044498	0.00014224	6.7187e-06	0.00044046	0.0014784	0.048143	0.12055	0.26362	0.23552	0.063827	0.19433	0.3889	0.87085
Asparagine	0.00018253	0.00089013	0.0012381	0.00054798	0.00024923	0.010416	0.00017537	0.00013842	0.00025521	1.5844e-05	5.5241e-05	6.854e-05	5.5787e-05	4.3296e-06	0.0004246	0.00076954	0.0013846	0.0066375	0.00033701	2.2916e-05	2.3823e-09	7.3191e-05	NA	0.00012506	0.00013617	0.00026705	0.024666	0.032663	0.0017621	0.00083146	0.0011051	0.00092791	0.00011271	0.00019059	0.00020059	3.0353e-05	0.0013703	1.5245e-06	2.8083e-05	0.0022307	0.0084882	0.02986	0.018614	0.11589	0.11363	0.029648	0.17608	0.29372	0.5837
Cytosin	4.3921e-06	8.2795e-06	2.4495e-06	4.7154e-07	1.4129e-05	0.00099461	4.8829e-06	1.2183e-05	1.9987e-06	3.6913e-06	6.4163e-07	2.1359e-07	6.828e-05	2.8002e-05	0.00020408	0.00017637	0.00047734	0.0035634	0.00080651	9.3612e-05	1.9744e-05	0.00038789	0.00012506	NA	3.0823e-06	5.6043e-05	0.0029024	0.01327	2.5351e-05	1.9273e-05	0.0014465	0.00013866	0.0011572	4.309e-06	0.00024588	0.00071205	0.00013515	0.00051292	0.0022889	0.00032194	0.0098709	0.00015644	0.00026797	0.007646	0.0062058	0.00066171	0.0087771	0.07464	0.15311
Q14112	3.7113e-05	2.3016e-05	0.00093036	6.7024e-06	2.2211e-05	0.0085006	0.00016494	0.00027889	0.00010471	0.00023713	0.00010074	1.2034e-05	0.00024148	0.00028817	0.0024904	0.0027011	0.0033024	0.00040745	3.4733e-05	2.9428e-06	6.6231e-05	0.00034965	0.00013617	3.0823e-06	NA	9.2071e-06	0.024846	0.0032994	0.00075094	0.00095073	0.0019479	1.8618e-05	1.4963e-05	0.00022001	0.00048234	0.00017354	1.9865e-05	3.6887e-05	0.00024385	0.00014619	0.0086296	0.0005076	0.0016806	0.036712	0.015535	0.0095423	0.015772	0.06359	0.23149
Ribitol	0.00016099	1.5463e-05	0.00053846	1.4985e-07	0.00026113	0.0012393	0.0004986	0.00089168	0.00039009	0.00046379	0.0002587	7.0372e-05	0.00028499	0.00030941	0.0069843	0.0055439	0.013371	0.009057	9.217e-05	2.4502e-05	0.00013253	0.0073031	0.00026705	5.6043e-05	9.2071e-06	NA	0.0037941	0.0040829	3.8709e-05	0.00057159	0.00027179	0.00036847	0.00041836	0.0014816	0.0024917	0.00049641	0.00038727	0.00056656	0.011452	0.0079943	0.017533	0.0007606	0.00034967	0.040434	0.017344	0.0085065	0.031769	0.064035	0.16833
Glycerol	0.004424	0.0012657	0.00088427	0.00020232	0.0055113	0.0006591	0.0015294	0.0014069	0.0012723	0.0015687	0.00040542	0.0028943	0.0046297	0.0028055	0.0010068	0.0020855	0.0051982	0.068448	0.038146	0.0056359	0.011528	0.022925	0.024666	0.0029024	0.024846	0.0037941	NA	0.0055181	0.00035172	0.00071768	0.00046962	0.045554	0.05157	0.011461	0.0049011	0.015069	0.0067766	0.075063	0.1955	0.04723	0.0014677	0.013197	0.010307	0.02947	0.02498	0.0030532	0.011334	0.093835	0.11956
Galactose	0.011255	0.020892	0.071216	0.0030034	0.012295	0.072016	0.013726	0.0096886	0.014235	0.024316	0.019826	0.0077902	0.069928	0.037714	0.0075971	0.026483	0.03624	0.0088074	0.0045425	0.00049362	0.0157	0.0091814	0.032663	0.01327	0.0032994	0.0040829	0.0055181	NA	0.022003	0.026159	0.012801	0.0049135	0.00051564	0.090656	0.019155	0.03275	0.015774	0.047252	0.058231	0.032902	0.010182	0.035037	0.11034	0.33694	0.24792	0.11277	0.089169	0.10948	0.60358
P23219	0.0011248	0.00019296	0.00037695	4.3702e-06	0.00084263	0.0012111	0.00034247	0.00041885	0.00026067	0.00010372	2.1979e-05	8.4592e-06	4.2805e-05	3.8912e-05	0.0043429	0.0016726	0.0023438	0.037505	0.011043	0.00027529	0.00055113	0.0060033	0.0017621	2.5351e-05	0.00075094	3.8709e-05	0.00035172	0.022003	NA	0.0001554	0.001722	0.00139	0.0053916	0.00085024	0.00010736	0.00033085	8.4385e-05	0.0052322	0.044273	0.021341	0.012333	0.0039578	0.001403	0.053348	0.036192	0.009636	0.05294	0.30296	0.22002
Q13885	1.5742e-05	9.8249e-05	1.9119e-05	4.3191e-05	0.0026381	0.0026047	0.00030675	0.00045453	0.00036116	0.00031106	7.8016e-05	8.1065e-05	0.00048732	0.00046428	0.0010709	0.0005813	0.0027527	0.0097091	0.0023919	0.0024252	0.00082604	0.010989	0.00083146	1.9273e-05	0.00095073	0.00057159	0.00071768	0.026159	0.0001554	NA	0.002018	0.00015779	0.014514	0.00090675	0.00085166	0.0026183	0.00089269	0.0030718	0.024519	0.0031192	0.0054999	0.00055465	0.00019854	0.0041074	0.0028441	0.00019383	0.002708	0.042517	0.049159
Alpha-Ketoglutaric	0.0018924	0.00011685	0.0015304	0.00020071	0.00022089	0.0057141	0.00087068	0.0014641	0.00019202	0.00075217	0.00012091	0.0013492	0.00068783	0.00045525	0.0046832	0.00283	0.0055728	0.015959	0.0055335	0.00014379	0.00038208	0.006338	0.0011051	0.0014465	0.0019479	0.00027179	0.00046962	0.012801	0.001722	0.002018	NA	0.014499	0.0063098	0.004483	0.001555	0.0019996	0.0017798	0.0028198	0.021018	0.00486	0.0014291	0.012662	0.013259	0.053535	0.02608	0.010074	0.019296	0.20411	0.2495
Q969E4	5.2282e-05	0.00191	0.007634	0.00036834	0.004284	0.039489	0.00094169	0.00098707	0.0011947	0.0014113	0.0012382	5.1039e-05	0.0020047	0.0012507	0.0078068	0.002306	0.0034369	0.00015596	6.3106e-05	0.00020047	0.00056341	0.0041139	0.00092791	0.00013866	1.8618e-05	0.00036847	0.045554	0.0049135	0.00139	0.00015779	0.014499	NA	0.00012473	0.0071927	0.0012786	0.0020451	0.00062533	0.00058691	0.0022445	0.0020105	0.024348	0.0027278	0.0070656	0.073736	0.047013	0.03856	0.037226	0.17846	0.24698
Lysine	0.0010544	0.0049762	0.031463	0.0010344	0.00075131	0.058338	0.0022166	0.0012841	0.0017699	0.0011456	0.0015225	0.00030813	0.0029948	0.00065182	0.0027553	0.0089538	0.0062665	0.00070568	7.2541e-05	7.7382e-08	4.1252e-05	1.9062e-05	0.00011271	0.0011572	1.4963e-05	0.00041836	0.05157	0.00051564	0.0053916	0.014514	0.0063098	0.00012473	NA	0.0064327	0.0002992	0.00012863	0.00041436	2.6832e-05	5.9085e-05	0.0025456	0.0068409	0.039956	0.099156	0.42657	0.32194	0.15054	0.24899	0.35475	0.88159
Malic acid	3.6944e-05	2.5829e-05	2.0433e-06	0.00018561	0.0006745	0.0065719	0.00023347	0.00033712	0.00037423	5.2787e-05	4.5674e-05	0.00033312	0.00021025	0.00010568	0.00020619	0.0012491	0.0023058	0.029243	0.0073963	0.0012959	0.00020193	0.00055925	0.00019059	4.309e-06	0.00022001	0.0014816	0.011461	0.090656	0.00085024	0.00090675	0.004483	0.0071927	0.0064327	NA	0.0013154	0.00036695	0.00085369	0.00027896	0.0015131	5.9279e-05	0.0025091	0.00065378	0.00089945	0.0045399	0.0081751	0.00033256	0.015884	0.06783	0.076693
Q9ULC3	0.0029982	0.0020814	0.0062969	0.00077051	0.00035613	0.031037	0.0018088	0.0012187	0.00058222	0.00028758	3.6807e-05	7.6073e-05	0.00017339	5.1765e-05	0.0027323	0.0044015	0.0018074	0.013686	0.012759	8.338e-06	7.6315e-05	5.9357e-05	0.00020059	0.00024588	0.00048234	0.0024917	0.0049011	0.019155	0.00010736	0.00085166	0.001555	0.0012786	0.0002992	0.0013154	NA	5.384e-06	9.9471e-07	9.3658e-05	0.0026774	0.0046379	0.0012497	0.050408	0.058829	0.28025	0.19423	0.036925	0.13513	0.5836	0.72064
Q16363	0.0012242	0.00023615	0.003745	0.0005561	0.0004654	0.018834	0.0019499	0.0014861	0.0020614	0.00030363	0.00015491	0.00014623	9.7332e-06	1.3103e-05	0.0015992	0.0082194	0.0054335	0.016615	0.0027144	1.2782e-05	0.00012427	5.3001e-05	3.0353e-05	0.00071205	0.00017354	0.00049641	0.015069	0.03275	0.00033085	0.0026183	0.0019996	0.0020451	0.00012863	0.00036695	5.384e-06	NA	1.9067e-06	6.3246e-06	0.00028872	0.0010998	0.00035279	0.02158	0.023458	0.17098	0.10191	0.032542	0.1221	0.30502	0.40478
Q6PCB0	0.001299	7.4836e-05	0.0028235	8.1993e-05	0.00013439	0.014172	0.00201	0.0021746	0.00077969	0.00090256	8.5847e-05	6.9041e-05	7.2028e-05	0.00022313	0.0060665	0.01075	0.0060281	0.006999	0.0042833	1.7978e-05	0.0010104	0.00044498	0.0013703	0.00013515	1.9865e-05	0.00038727	0.0067766	0.015774	8.4385e-05	0.00089269	0.0017798	0.00062533	0.00041436	0.00085369	9.9471e-07	1.9067e-06	NA	0.00014215	0.0035027	0.0010345	0.00088953	0.0053208	0.0093298	0.10364	0.036594	0.012333	0.024573	0.1951	0.27566
Aspartic acid	0.00030283	0.00093554	0.004781	0.0014283	0.001107	0.054884	0.0038761	0.0036324	0.0024587	0.00089993	0.00072391	0.00094709	0.00067189	0.00022994	0.0051139	0.013114	0.01227	0.0057402	0.00038386	2.0357e-05	8.9395e-06	0.00014224	1.5245e-06	0.00051292	3.6887e-05	0.00056656	0.075063	0.047252	0.0052322	0.0030718	0.0028198	0.00058691	2.6832e-05	0.00027896	9.3658e-05	6.3246e-06	0.00014215	NA	1.9251e-05	0.00046077	0.0040933	0.022799	0.031409	0.18084	0.13222	0.030485	0.14398	0.25155	0.47611
Squalene	0.00088725	0.0060134	0.017911	0.009606	0.00077298	0.051362	0.00099527	0.00065724	0.0014445	0.0004111	0.0012283	0.000931	0.00090123	0.00027626	0.00093783	0.0035105	0.0018989	0.0005441	0.00025459	0.00037562	7.8521e-05	6.7187e-06	2.8083e-05	0.0022889	0.00024385	0.011452	0.1955	0.058231	0.044273	0.024519	0.021018	0.0022445	5.9085e-05	0.0015131	0.0026774	0.00028872	0.0035027	1.9251e-05	NA	0.00030596	0.013255	0.057706	0.10958	0.19559	0.17624	0.13152	0.21607	0.34885	0.7239
Uridine	4.5604e-05	7.5167e-05	0.00059563	0.0021345	0.0015161	0.058523	0.001774	0.0022107	0.0019989	0.002015	0.0011752	0.0016596	0.0026266	0.0023581	0.00057426	0.0058105	0.007504	0.0037603	0.0024575	0.0014253	0.0028386	0.00044046	0.0022307	0.00032194	0.00014619	0.0079943	0.04723	0.032902	0.021341	0.0031192	0.00486	0.0020105	0.0025456	5.9279e-05	0.0046379	0.0010998	0.0010345	0.00046077	0.00030596	NA	0.00029457	0.00032857	0.0074703	0.0088197	0.0062244	0.0017587	0.0030171	0.035324	0.058922
Lactobionic acid	0.0020204	0.00093562	0.0055934	0.0050704	0.012298	0.064034	0.0099613	0.0073886	0.012207	0.0062157	0.0027288	0.010593	0.0049183	0.0034724	0.0005149	0.012012	0.012357	0.031932	0.022165	0.0015118	0.011501	0.0014784	0.0084882	0.0098709	0.0086296	0.017533	0.0014677	0.010182	0.012333	0.0054999	0.0014291	0.024348	0.0068409	0.0025091	0.0012497	0.00035279	0.00088953	0.0040933	0.013255	0.00029457	NA	0.015314	0.0503	0.065011	0.050101	0.0069364	0.013957	0.08938	0.096997
Cadaverine	6.23e-05	5.9345e-06	2.6138e-05	9.4125e-05	0.0066191	0.0069198	0.0030953	0.0064732	0.0042549	0.0079711	0.0040287	0.002441	0.0078029	0.014633	0.0080476	0.014242	0.039406	0.022833	0.004007	0.015817	0.026173	0.048143	0.02986	0.00015644	0.0005076	0.0007606	0.013197	0.035037	0.0039578	0.00055465	0.012662	0.0027278	0.039956	0.00065378	0.050408	0.02158	0.0053208	0.022799	0.057706	0.00032857	0.015314	NA	8.3e-07	7.0058e-05	1.3482e-05	2.1068e-05	2.9046e-05	0.00091229	0.0011928
N-Acetyl-aspartic	0.00037565	1.7158e-05	1.1204e-05	9.2605e-05	0.010085	0.0016682	0.0027643	0.0070148	0.0052396	0.0060545	0.0033412	0.0027163	0.0028519	0.0097989	0.019639	0.010811	0.038449	0.060023	0.0095094	0.030435	0.022226	0.12055	0.018614	0.00026797	0.0016806	0.00034967	0.010307	0.11034	0.001403	0.00019854	0.013259	0.0070656	0.099156	0.00089945	0.058829	0.023458	0.0093298	0.031409	0.10958	0.0074703	0.0503	8.3e-07	NA	1.9279e-05	4.5933e-06	3.6858e-05	0.00024013	0.0026319	0.0013369
Glycerol-3-phospha	0.0020584	0.0011185	0.00016478	0.0079985	0.061023	0.0069723	0.0073376	0.015888	0.017167	0.021802	0.017299	0.036361	0.023995	0.049734	0.021069	0.009457	0.034938	0.074137	0.051991	0.22268	0.12906	0.26362	0.11589	0.007646	0.036712	0.040434	0.02947	0.33694	0.053348	0.0041074	0.053535	0.073736	0.42657	0.0045399	0.28025	0.17098	0.10364	0.18084	0.19559	0.0088197	0.065011	7.0058e-05	1.9279e-05	NA	2.9675e-08	9.6752e-05	1.056e-05	0.0016674	3.3117e-05
Linoleic acid	0.0025837	0.00018947	0.0002645	0.0032944	0.025386	0.0044836	0.0087366	0.020395	0.013243	0.026879	0.013458	0.022888	0.013658	0.046137	0.034907	0.020018	0.053478	0.050809	0.031111	0.14156	0.12831	0.23552	0.11363	0.0062058	0.015535	0.017344	0.02498	0.24792	0.036192	0.0028441	0.02608	0.047013	0.32194	0.0081751	0.19423	0.10191	0.036594	0.13222	0.17624	0.0062244	0.050101	1.3482e-05	4.5933e-06	2.9675e-08	NA	8.642e-05	2.4359e-07	0.00078681	6.9923e-05
P78559	0.00061536	7.9329e-05	1.5897e-06	0.00097042	0.014241	0.0092483	0.01128	0.018197	0.010579	0.013499	0.0048669	0.014161	0.018641	0.025585	0.0059364	0.026488	0.07175	0.14081	0.041428	0.045562	0.033145	0.063827	0.029648	0.00066171	0.0095423	0.0085065	0.0030532	0.11277	0.009636	0.00019383	0.010074	0.03856	0.15054	0.00033256	0.036925	0.032542	0.012333	0.030485	0.13152	0.0017587	0.0069364	2.1068e-05	3.6858e-05	9.6752e-05	8.642e-05	NA	5.9901e-05	0.00066778	0.0020431
1-Monopalmitin	0.0029818	0.00050828	0.0011514	0.0046578	0.033226	0.019877	0.016421	0.030045	0.017553	0.048323	0.018558	0.034955	0.039944	0.08431	0.030711	0.027361	0.059419	0.032627	0.040416	0.10448	0.16702	0.19433	0.17608	0.0087771	0.015772	0.031769	0.011334	0.089169	0.05294	0.002708	0.019296	0.037226	0.24899	0.015884	0.13513	0.1221	0.024573	0.14398	0.21607	0.0030171	0.013957	2.9046e-05	0.00024013	1.056e-05	2.4359e-07	5.9901e-05	NA	0.00052331	0.00017174
Glyceric acid	0.019893	0.011397	0.011825	0.033041	0.16837	0.058005	0.15429	0.19476	0.20435	0.25669	0.20974	0.2265	0.28557	0.39129	0.079336	0.27907	0.51053	0.20961	0.048639	0.3024	0.3837	0.3889	0.29372	0.07464	0.06359	0.064035	0.093835	0.10948	0.30296	0.042517	0.20411	0.17846	0.35475	0.06783	0.5836	0.30502	0.1951	0.25155	0.34885	0.035324	0.08938	0.00091229	0.0026319	0.0016674	0.00078681	0.00066778	0.00052331	NA	0.0012287
Phosphoethanolamin	0.033994	0.019908	0.016577	0.087324	0.52367	0.12325	0.20493	0.2784	0.30749	0.31384	0.25542	0.34827	0.22625	0.37131	0.22044	0.21229	0.38643	0.34471	0.22064	0.65358	0.68777	0.87085	0.5837	0.15311	0.23149	0.16833	0.11956	0.60358	0.22002	0.049159	0.2495	0.24698	0.88159	0.076693	0.72064	0.40478	0.27566	0.47611	0.7239	0.058922	0.096997	0.0011928	0.0013369	3.3117e-05	6.9923e-05	0.0020431	0.00017174	0.0012287	NA
Arachidonic acid	0.092876	0.017409	0.015693	0.11266	0.37523	0.13805	0.28201	0.38093	0.40097	0.40364	0.32487	0.40818	0.26661	0.47792	0.22018	0.38685	0.66082	0.721	0.36407	0.66265	0.71827	0.81403	0.5423	0.17716	0.2434	0.17125	0.14307	0.56783	0.31621	0.10367	0.22551	0.51434	0.96656	0.071302	0.8488	0.40651	0.34379	0.55366	0.75483	0.063672	0.11462	0.0020465	0.0015473	0.00017782	0.00014509	0.0010636	0.00065673	0.00014758	1.2247e-05
Propylene glycol	0.02279	0.0058825	0.0020767	0.032946	0.21912	0.085785	0.16374	0.21551	0.18017	0.19624	0.11378	0.22179	0.17741	0.26154	0.098705	0.22685	0.37441	0.46569	0.25872	0.34934	0.39536	0.42242	0.34663	0.042761	0.11052	0.10564	0.035702	0.39737	0.10349	0.020752	0.13346	0.263	0.61301	0.011375	0.28284	0.19982	0.088733	0.22534	0.55739	0.02208	0.030045	0.00056808	0.001021	0.00022403	0.00027758	6.1986e-06	0.0001183	0.00029041	2.5374e-05
P07585	0.0005557	0.0057049	0.021836	0.0032301	0.0010294	0.014556	0.00051913	0.0006801	0.00029884	0.0016743	0.0020557	0.0013424	0.0057079	0.0039869	0.0087831	0.0025618	0.0015877	1.0634e-07	2.5674e-05	0.0032452	0.0030102	0.0028631	0.0074778	0.0020093	0.00017179	0.0094554	0.16348	0.037198	0.053027	0.022321	0.030307	0.00070654	0.00122	0.014853	0.023294	0.020261	0.0076997	0.0036688	0.00018267	0.0022598	0.082239	0.014553	0.048343	0.066779	0.040888	0.1151	0.040919	0.1706	0.37629
P19823	0.00061259	0.010555	0.0046276	0.0050187	0.010658	0.014154	0.0065611	0.008143	0.0034462	0.010543	0.013251	0.028159	0.091031	0.037772	0.0080321	0.017623	0.041012	0.0055822	0.00064952	0.02338	0.0062342	0.024742	0.015366	0.0046476	0.006885	0.012403	0.069829	0.042133	0.12607	0.021886	0.022301	0.026435	0.020387	0.011923	0.13017	0.14296	0.1112	0.015454	0.016276	0.011431	0.11512	0.010571	0.034042	0.034042	0.044106	0.013173	0.036825	0.020792	0.21455
Panose	0.00088368	0.0017006	0.0011995	0.00094587	0.011496	0.025751	0.00061426	0.0008072	0.0008177	0.00068045	0.00021825	0.0010719	0.0015244	0.00080144	0.0037785	0.00014304	0.0004918	0.018408	0.030029	0.0022075	0.001856	0.021225	0.00394	0.00061724	0.0060097	0.0043122	0.00036522	0.022401	0.00036639	8.0684e-05	0.00034533	0.0027528	0.02384	0.0022416	0.0010588	0.0077239	0.003912	0.013313	0.060769	0.0076312	0.0020595	0.0095555	0.0058958	0.015192	0.021603	0.0061842	0.010795	0.29749	0.102
Maltose	0.0012	0.0020973	0.010756	0.00054607	0.0097522	0.058238	0.0027201	0.002573	0.0023379	0.0026187	0.001184	0.0026224	0.0055049	0.0020313	0.0069643	0.0024922	0.003333	0.006822	0.0070852	4.9501e-05	0.001448	0.0078247	0.0043327	0.0020795	0.0011334	0.00075127	0.0011421	0.00081064	0.0009299	0.0031778	0.0001605	0.001563	0.00085451	0.0055954	0.00074811	0.0026108	0.0012096	0.0033034	0.030174	0.0055004	0.00045351	0.014521	0.02728	0.10512	0.094212	0.032007	0.035146	0.28819	0.21893
P39059	0.014161	0.0080276	0.094882	0.0069534	0.015238	0.1774	0.025973	0.023898	0.039221	0.036045	0.02741	0.0059698	0.014656	0.024471	0.035969	0.06124	0.048082	0.0069569	0.0059661	0.00062339	0.029578	0.0085372	0.024502	0.013879	0.00020879	0.0046557	0.1036	0.00097983	0.01955	0.04497	0.05311	0.0012073	0.00028118	0.03456	0.0090918	0.00187	0.0006518	0.0087014	0.0097428	0.0051114	0.0075901	0.016828	0.050616	0.24732	0.12575	0.15318	0.070493	0.14155	0.34678
Hypotaurine	0.011505	0.023273	0.11115	0.0033562	0.01058	0.12512	0.018047	0.013895	0.012633	0.02625	0.018231	0.0077201	0.060067	0.033653	0.025812	0.039258	0.030022	0.0020093	0.0032893	0.00014814	0.013602	0.0056459	0.036402	0.0099771	0.00055433	0.0042518	0.031848	2.3488e-06	0.019413	0.052535	0.02415	0.0017676	4.8057e-05	0.063078	0.0073919	0.017994	0.0032299	0.015231	0.025116	0.020661	0.016713	0.040332	0.14684	0.45028	0.31445	0.1897	0.11996	0.22958	0.69655
Hydrocinnamic acid	0.0045092	0.0021157	0.020909	0.00056918	0.00031388	0.072468	0.0058768	0.0059102	0.0027864	0.0056905	0.0035234	0.00064875	0.010082	0.0055395	0.012283	0.033159	0.030606	0.009787	0.002411	3.4838e-06	0.00095892	0.00051632	0.0035112	0.00056519	1.0403e-05	0.00025156	0.046038	0.0003684	0.0039058	0.029971	0.0044125	0.0012779	6.9844e-06	0.005615	0.002137	0.0019338	0.00064873	0.0013992	0.0039104	0.0021183	0.017027	0.0088005	0.044608	0.30085	0.18386	0.073997	0.1248	0.23635	0.70346
Galacturonic acid	0.0072895	0.03095	0.074032	0.0067058	0.0059766	0.1443	0.020056	0.013735	0.012719	0.018745	0.015941	0.0081084	0.06705	0.025956	0.009577	0.043213	0.046469	0.0049445	0.0013821	8.0603e-05	0.0015012	0.0010733	0.0030899	0.0072629	0.00072982	0.0053369	0.047785	2.467e-05	0.046304	0.022381	0.017271	0.0020075	1.0842e-05	0.043276	0.0038439	0.011683	0.0079563	0.0018973	0.0049059	0.015822	0.018324	0.084425	0.19757	0.56935	0.45298	0.12645	0.22535	0.18345	0.95501
Tryptophan	0.019155	0.045902	0.18208	0.0449	0.078371	0.4738	0.1329	0.11802	0.13879	0.1255	0.11097	0.086679	0.12563	0.10217	0.080596	0.19589	0.20191	0.015859	0.0044913	0.0026853	0.024617	0.020405	0.013073	0.06389	0.0025726	0.019004	0.25402	0.0051074	0.18364	0.075071	0.064422	0.0074555	0.00045579	0.065872	0.024853	0.010098	0.012442	0.0010723	0.0073147	0.011784	0.011488	0.098086	0.19331	0.48957	0.35592	0.16712	0.18198	0.098811	0.52695
Phenylalanine	0.0042469	0.01694	0.087642	0.014377	0.024242	0.25748	0.047115	0.040446	0.044783	0.041839	0.036857	0.026398	0.04833	0.032506	0.031035	0.085607	0.088259	0.0033042	0.00047748	0.00039531	0.0049678	0.0048107	0.0026863	0.020487	0.00040367	0.0056851	0.16389	0.0030424	0.090901	0.029801	0.025803	0.0014171	3.2056e-05	0.029197	0.0079925	0.0029094	0.0039672	0.00010149	0.0011923	0.0038111	0.00693	0.054397	0.12505	0.37809	0.25951	0.11339	0.13878	0.10035	0.51681
5	6-Dihydrouracil	0.11009	0.16896	0.23167	0.11264	0.2257	0.028144	0.040425	0.025288	0.12607	0.033653	0.07558	0.091482	0.023585	0.023835	0.025535	0.025771	0.023652	0.093221	0.061088	0.13128	0.12165	0.10442	0.074846	0.28666	0.24418	0.14246	0.066166	0.17499	0.11368	0.17668	0.25444	0.22689	0.1216	0.23063	0.16954	0.042298	0.17584	0.21349	0.098366	0.41312	0.071642	0.51007	0.31228	0.35543	0.41008	0.60347	0.56429	0.51851
Q9H6Z4	0.013785	0.0061121	0.0070161	0.010701	0.0051879	0.0020102	0.002396	0.0016241	0.0058552	0.00045052	0.0010839	0.0040233	0.00010457	0.00016394	0.0012239	0.0065222	0.0034072	0.070506	0.031626	0.0199	0.0076663	0.0017248	0.0042979	0.012101	0.025532	0.033542	0.035683	0.33559	0.009181	0.04258	0.056806	0.11619	0.036457	0.0018048	0.0088617	0.00047134	0.0069248	0.012245	0.0038062	0.027508	0.015273	0.099041	0.063538	0.10122	0.1051	0.085594	0.24012	0.37752	0.3774
P55039	0.02438	0.027995	0.0034886	0.018151	0.017006	0.0001292	0.0059189	0.0062074	0.0075389	0.0040144	0.0060635	0.015723	0.010794	0.011234	0.0089922	0.01473	0.018127	0.12757	0.067557	0.20521	0.046413	0.052341	0.053645	0.012753	0.098843	0.098607	0.050915	0.62618	0.037016	0.02793	0.22641	0.21517	0.30242	0.015156	0.10943	0.093399	0.096056	0.14831	0.083396	0.16338	0.29696	0.075026	0.031952	0.028944	0.040617	0.03233	0.13608	0.15201	0.27384
Carinitine	0.0057223	0.024747	0.0049303	0.0033925	0.013452	0.00098688	0.0019881	0.0011687	0.0033448	0.00070702	0.0015624	0.0035174	0.006441	0.0024953	0.0022751	0.0036974	0.0033407	0.037892	0.018832	0.025867	0.0057563	0.0083726	0.0094413	0.002343	0.017805	0.023853	0.015899	0.12937	0.0047459	0.0096091	0.15474	0.038519	0.033311	0.0041669	0.01073	0.018709	0.018073	0.027006	0.028404	0.11095	0.1062	0.077624	0.040316	0.09875	0.14796	0.045658	0.21344	0.22083	0.45535
Q96ST3	0.0018485	0.0023629	0.001342	0.0059967	0.070295	0.015179	0.014905	0.013018	0.039835	0.017243	0.020323	0.046426	0.03774	0.03027	0.00055361	0.019486	0.045992	0.11363	0.030695	0.051051	0.072364	0.03703	0.056861	0.018262	0.038168	0.02749	0.0023489	0.026902	0.038547	0.015781	0.042267	0.10902	0.083304	0.0029943	0.10705	0.030728	0.051806	0.077589	0.098113	0.0062376	0.0005389	0.0025512	0.007602	0.0037046	0.009317	0.0010144	0.0055571	0.0017983	0.0056231
Urea	0.00158	0.0032228	0.017398	0.0020361	0.0095009	0.051934	0.0080908	0.0057892	0.009597	0.0081351	0.0072351	0.0018013	0.011884	0.0052223	0.0019606	0.017078	0.030198	0.015322	0.0016881	0.00045791	0.0051916	0.0034356	0.0066246	0.0069913	0.0047439	0.0016913	0.0054908	0.0002495	0.0061971	0.0036282	0.0026892	0.001152	0.0007449	0.035182	0.0075059	0.0032368	0.0070719	0.010738	0.020646	0.0046928	0.0013394	0.010709	0.050336	0.20061	0.13169	0.04773	0.074135	0.14664	0.31657
N-Acetyl glucosami	0.004672	0.01224	0.048147	0.0061108	0.0024006	0.091185	0.0031772	0.0017312	0.0021959	0.0033792	0.0023625	0.00040163	0.0076068	0.002533	0.0017711	0.0057638	0.0034914	0.0017833	0.0047872	0.00015419	0.0031182	0.0001858	0.0083214	0.0044464	0.002684	0.013958	0.018871	0.00054894	0.0093443	0.010394	0.0068759	0.00056347	0.00017488	0.038931	0.00092166	0.0032484	0.0022402	0.010201	0.0042568	0.0028429	0.0031131	0.044634	0.18083	0.37542	0.26568	0.15612	0.12876	0.53073	0.78999
Inositol-4-monopho	0.0017691	0.012461	0.026173	0.0035883	0.041135	0.069895	0.024485	0.019204	0.014226	0.019273	0.01457	0.01392	0.057637	0.017279	0.013112	0.035549	0.050378	0.017287	0.0036537	0.0029557	0.011982	0.017243	0.032032	0.013109	0.017124	0.0051579	0.0071862	0.0036598	0.0095483	0.008891	0.0062599	0.003758	0.0035766	0.048077	0.013349	0.022455	0.016724	0.014734	0.072786	0.019096	0.0069205	0.020274	0.098191	0.25979	0.21765	0.054076	0.10128	0.23539	0.26959
Beta-Ketoadipic ac	0.0036162	0.010958	0.040938	0.0016684	0.017797	0.058022	0.018769	0.015688	0.0086461	0.011489	0.007937	0.0058238	0.021674	0.0059794	0.029806	0.034298	0.042326	0.013563	0.001597	0.00024401	0.0021899	0.013321	0.0076579	0.01007	0.0058904	0.00052305	0.010335	0.0033216	0.0026244	0.0088721	0.0015028	0.0014569	0.00050008	0.053568	0.0032178	0.0058814	0.0054322	0.0031609	0.043275	0.040174	0.015033	0.046743	0.10031	0.45059	0.32752	0.12233	0.22121	0.45825	0.55382
Threonine	0.089904	0.089181	0.28874	0.083148	0.16374	0.2677	0.10858	0.10138	0.23979	0.19463	0.26876	0.084917	0.16401	0.20402	0.086685	0.17433	0.23913	0.074944	0.026783	0.061618	0.22603	0.13985	0.17143	0.17095	0.035954	0.046106	0.28953	0.0038895	0.23269	0.26219	0.27982	0.046684	0.028899	0.28131	0.42863	0.12541	0.19026	0.25827	0.10794	0.085843	0.12352	0.057418	0.11993	0.27236	0.20608	0.41083	0.20017	0.07991	0.3344
Isohexonic acid	0.15216	0.081628	0.12208	0.094811	0.27405	0.069919	0.093076	0.096505	0.22212	0.19867	0.21986	0.1459	0.17723	0.25941	0.060939	0.096066	0.18416	0.31075	0.22958	0.33824	0.56343	0.45807	0.51905	0.24138	0.28912	0.15894	0.028257	0.036929	0.17726	0.1455	0.21738	0.29497	0.47967	0.35696	0.67329	0.385	0.40084	0.96321	0.69022	0.23879	0.1009	0.044931	0.051273	0.037006	0.035105	0.12918	0.034512	0.0398	0.051447
Glucose	0.0003173	0.00017884	0.0048609	8.514e-06	3.2277e-05	0.0017745	5.6128e-05	5.2068e-05	2.7711e-05	7.6141e-05	5.329e-05	5.6022e-05	0.00024698	6.9658e-05	0.00083602	0.0007887	0.00082702	0.00033665	3.7358e-05	3.4582e-07	7.5262e-05	0.00029442	0.00050638	0.00037144	2.4262e-05	1.2332e-05	0.0022576	0.00033561	0.00066077	0.0063076	7.1407e-05	0.0010432	1.2317e-05	0.0038729	0.0010165	0.00038999	0.00034822	0.00092697	0.0015115	0.003483	0.0030622	0.0088756	0.019554	0.11226	0.063892	0.05362	0.053571	0.18645	0.41071
Hexitol	0.003365	0.0013034	0.018402	0.00062041	0.00060769	0.0043383	0.00074339	0.00058477	0.00069163	0.00039885	0.00045307	0.0017117	0.00032078	0.00011731	0.0023988	0.0029586	0.0022808	0.0032539	0.000589	3.1595e-05	0.00038894	0.00090317	0.00076217	0.0079425	0.0014106	0.00040174	0.0055527	0.0067068	0.0044321	0.030998	0.00011865	0.016794	0.0002503	0.0095899	0.0027414	0.0002396	0.0018021	0.0013692	0.0020063	0.012838	0.0019706	0.060413	0.071523	0.21061	0.14209	0.1345	0.15061	0.34529	0.51483
Q9Y6B6	0.00024494	0.00012379	0.0014262	1.8709e-05	0.00015261	0.0028663	1.3013e-05	1.0264e-05	4.3179e-05	2.321e-05	6.7042e-06	1.6099e-07	8.0912e-06	1.3512e-05	0.00027213	8.0714e-05	7.0316e-05	0.0011934	0.0015226	2.6579e-05	0.00042603	0.00044879	0.00089067	3.8866e-05	6.5617e-05	0.00027765	0.00086909	0.0017741	1.6231e-05	0.00017647	0.0013644	8.5143e-05	0.0004878	0.001617	7.9676e-05	0.00010976	2.5513e-05	0.0036196	0.0041755	0.0017769	0.0013376	0.0030948	0.0045028	0.03885	0.021688	0.020065	0.017681	0.20847	0.22902
Q9Y6F6	0.0012393	0.0020987	0.006364	0.00020702	0.0035092	0.0086824	0.00017327	0.00011606	0.000507	0.00024244	0.00015067	0.00032151	0.00063488	0.00031279	0.0010085	0.00010406	0.00013967	0.0032333	0.0053752	0.00010537	0.00090546	0.0039508	0.0019284	0.00097592	0.0010036	0.001006	0.00021301	0.00069934	0.00030234	0.0011029	0.0011184	0.0017399	0.0014636	0.0049487	0.00046777	0.0015553	0.00091108	0.0081979	0.019293	0.014732	0.0011286	0.02255	0.016399	0.065074	0.063396	0.0364	0.03484	0.24095	0.26882
Q9H773	0.0041193	0.0087481	0.016884	0.0021502	0.033806	0.0078984	0.0055561	0.0037066	0.016333	0.00748	0.0073434	0.0069059	0.0092633	0.011152	0.0033697	0.007458	0.007474	0.010621	0.0090627	0.012367	0.040919	0.020054	0.038048	0.0098483	0.0068411	0.013378	0.0046236	0.0070032	0.0070679	0.0074666	0.10398	0.011114	0.014663	0.017883	0.014247	0.0086444	0.003851	0.044462	0.050109	0.040374	0.0066085	0.019532	0.018497	0.049694	0.04458	0.035543	0.027455	0.038959	0.10124
Q09161	0.0003194	0.0074478	0.0061308	0.0016758	0.047767	0.0057091	0.0011713	0.00066086	0.006565	0.0012658	0.003129	0.0060813	0.0055209	0.0024971	0.00077875	0.00055584	0.0011479	0.0044369	0.0022277	0.0098304	0.00919	0.016744	0.0090107	0.0061267	0.0085614	0.0078689	0.0041112	0.015737	0.0062665	0.0035629	0.049155	0.0063241	0.010556	0.0054324	0.018354	0.0092937	0.014846	0.017548	0.02236	0.025908	0.0054455	0.019003	0.014771	0.023893	0.046996	0.031095	0.042088	0.070981	0.067421
Q12874	0.0023218	0.037365	0.023426	0.013992	0.10338	0.015133	0.0024188	0.0015197	0.014073	0.0044119	0.010133	0.011563	0.013115	0.0078783	0.0026491	0.00031134	0.001373	0.0055586	0.0062684	0.040015	0.01923	0.062815	0.013913	0.025641	0.045507	0.034836	0.0086727	0.028632	0.029132	0.0016923	0.065226	0.0070631	0.047732	0.056603	0.051415	0.047662	0.079174	0.070782	0.053405	0.084001	0.025627	0.070963	0.036155	0.034184	0.064746	0.078605	0.061003	0.14168	0.12975
Q9UMS4	0.0087325	0.041602	0.065396	0.012662	0.1043	0.01572	0.0026088	0.002043	0.013365	0.007388	0.01592	0.023667	0.018891	0.012575	0.011282	0.00050659	0.0010955	0.003379	0.0089824	0.030698	0.039677	0.10045	0.052532	0.053202	0.043608	0.025084	0.0099448	0.014197	0.033407	0.035568	0.039614	0.025059	0.040655	0.08835	0.11142	0.079985	0.10025	0.14148	0.091062	0.12248	0.034091	0.084999	0.061447	0.052827	0.086429	0.22076	0.077453	0.25386	0.14093
Q9Y6H1	0.0011799	0.0070422	0.024768	0.00094364	0.022098	0.0093573	0.00044302	0.0003009	0.0023749	0.0010924	0.0019613	0.0014884	0.0020325	0.0012876	0.0041607	0.00022081	0.00024758	0.00045067	0.0012588	0.0017803	0.0071672	0.017581	0.011949	0.006542	0.0028672	0.0024595	0.0050527	0.0028768	0.0022803	0.0073005	0.015675	0.0011106	0.0026833	0.022243	0.011126	0.0073603	0.0063873	0.02381	0.022061	0.030788	0.0090764	0.023754	0.023234	0.061254	0.064882	0.12563	0.051869	0.24611	0.16186
P55060	0.0022933	0.016066	0.063479	0.0092668	0.027858	0.049058	0.0026223	0.0016255	0.0077023	0.0077313	0.0098128	0.0060012	0.014142	0.0092275	0.0021958	0.0014099	0.0020017	0.00013008	0.00092293	0.0036453	0.018306	0.01161	0.020539	0.02714	0.0086959	0.018844	0.012692	0.00040235	0.045655	0.010409	0.013384	0.0015654	0.0028819	0.08906	0.026932	0.019018	0.021107	0.038189	0.012918	0.010691	0.0024863	0.040007	0.095271	0.10688	0.085754	0.15014	0.033666	0.15458	0.23551
O43290	0.0015874	0.0075725	0.034062	0.0058989	0.076074	0.025995	0.0059911	0.0047679	0.020858	0.010153	0.013908	0.010918	0.0067955	0.0065357	0.0066379	0.0035629	0.0075435	0.0033174	0.0014271	0.010676	0.029363	0.050193	0.02162	0.037483	0.018856	0.0071254	0.007945	0.0082291	0.016396	0.0052182	0.014675	0.0030742	0.013011	0.066157	0.040563	0.0097152	0.021287	0.035346	0.041779	0.025004	0.002406	0.022086	0.027403	0.049986	0.041511	0.091205	0.031563	0.11116	0.053492
Q96A49	0.0005808	0.01259	0.022902	0.0049298	0.055452	0.015377	0.00096058	0.0005316	0.0070014	0.001609	0.0047458	0.0028059	0.002787	0.0014025	0.0016841	0.00022958	0.00060516	0.0010934	0.00087213	0.0084658	0.0087256	0.021468	0.0071744	0.014865	0.013705	0.0089011	0.011283	0.01294	0.0089276	0.0027726	0.03022	0.0009633	0.0076344	0.034183	0.023976	0.0089601	0.024773	0.025097	0.015711	0.027128	0.0082322	0.032793	0.031209	0.051669	0.068601	0.1173	0.070953	0.21915	0.12248
P04350	0.031546	0.093769	0.17603	0.033297	0.21001	0.071908	0.024265	0.018434	0.08108	0.056087	0.08005	0.04662	0.07361	0.075004	0.033341	0.012689	0.019317	0.011279	0.020509	0.056359	0.14641	0.1669	0.14215	0.10988	0.05638	0.051174	0.028767	0.0030858	0.070819	0.050213	0.17764	0.019444	0.047392	0.24125	0.1671	0.11938	0.10931	0.26492	0.18108	0.18622	0.051695	0.096271	0.089393	0.12558	0.13708	0.29241	0.087411	0.14032	0.17681
Q92688	0.0075733	0.031431	0.057797	0.014151	0.10784	0.071319	0.012784	0.0093548	0.04537	0.021306	0.026919	0.019456	0.024239	0.024877	0.010216	0.00628	0.010971	0.010233	0.011103	0.015308	0.038869	0.057616	0.023986	0.034513	0.015807	0.022189	0.014874	0.0035269	0.031383	0.0069145	0.075236	0.0055919	0.016458	0.061919	0.033171	0.022044	0.026123	0.051288	0.058917	0.055017	0.008019	0.055166	0.03884	0.077812	0.087122	0.091358	0.048804	0.08399	0.14209
O15551	0.013389	0.017337	0.056519	0.0077652	0.084848	0.039647	0.011949	0.0092731	0.039546	0.014236	0.015233	0.0077281	0.0041255	0.0075818	0.020025	0.0081529	0.0098814	0.023482	0.018853	0.010869	0.040814	0.062752	0.026497	0.033126	0.01817	0.0096276	0.0086638	0.013136	0.0037439	0.0063509	0.051887	0.0051383	0.019345	0.064271	0.013532	0.0045858	0.0068639	0.051283	0.086151	0.083713	0.0075196	0.054474	0.027306	0.11121	0.089292	0.13413	0.080252	0.23525	0.14332
P55196	0.071973	0.14263	0.18369	0.076556	0.35147	0.075912	0.039143	0.032353	0.14291	0.072933	0.10931	0.085248	0.066807	0.088315	0.056643	0.015611	0.02354	0.056549	0.088041	0.167	0.23935	0.30803	0.19153	0.17643	0.1485	0.12072	0.044154	0.049078	0.087899	0.067459	0.30419	0.072638	0.18447	0.24425	0.24468	0.15658	0.18301	0.4112	0.29688	0.31974	0.090474	0.16531	0.083545	0.086338	0.12198	0.311	0.11988	0.20619	0.12897
Q8IX12	0.030922	0.099996	0.16544	0.045375	0.1738	0.094069	0.014235	0.0090035	0.062826	0.020189	0.03966	0.020462	0.017147	0.017094	0.021963	0.0047324	0.0049007	0.014869	0.027866	0.032674	0.05619	0.073775	0.039686	0.082958	0.050129	0.056198	0.05181	0.022085	0.034787	0.036653	0.17099	0.011976	0.027493	0.13431	0.0549	0.029325	0.05997	0.11296	0.063948	0.15435	0.038978	0.18935	0.12522	0.2065	0.25062	0.4073	0.24204	0.46583	0.35518
Q9UK45	0.073414	0.068564	0.18241	0.040039	0.22147	0.085333	0.052971	0.046673	0.10765	0.070314	0.064591	0.10264	0.043375	0.059519	0.082636	0.031682	0.027981	0.047359	0.085566	0.052607	0.1755	0.20236	0.16475	0.16637	0.082492	0.060951	0.015722	0.03326	0.047021	0.094361	0.082622	0.098464	0.087992	0.15816	0.07787	0.048535	0.039628	0.17831	0.25072	0.21316	0.013811	0.17488	0.11567	0.15702	0.14687	0.26315	0.091799	0.27255	0.13762
Q96AB3	0.052789	0.077462	0.1662	0.031848	0.25603	0.094978	0.041637	0.040097	0.12466	0.065332	0.090235	0.058971	0.04134	0.060558	0.11451	0.028605	0.038822	0.049742	0.04458	0.056651	0.12746	0.27453	0.10197	0.10577	0.043426	0.023806	0.066224	0.032748	0.032819	0.071532	0.18161	0.029802	0.064261	0.14587	0.14609	0.066724	0.076327	0.17035	0.21503	0.25682	0.096065	0.10401	0.041391	0.12415	0.13703	0.31367	0.15548	0.24318	0.14683
O75955	0.16684	0.19647	0.39854	0.10904	0.3918	0.22019	0.085682	0.073504	0.1869	0.11847	0.13431	0.13184	0.079062	0.096872	0.16659	0.04013	0.033005	0.0752	0.17354	0.091856	0.25652	0.31652	0.25747	0.27535	0.15766	0.12257	0.056362	0.04556	0.069905	0.18844	0.18138	0.10355	0.12365	0.3228	0.14363	0.10979	0.10986	0.34982	0.36232	0.37908	0.059607	0.32899	0.23356	0.31515	0.33545	0.6216	0.25635	0.67774	0.30107
Q99598	0.1117	0.2606	0.3848	0.14587	0.50604	0.24518	0.085344	0.066999	0.21964	0.12361	0.16837	0.1483	0.11636	0.11916	0.11325	0.02972	0.033225	0.049406	0.10822	0.13168	0.23418	0.32083	0.19444	0.29092	0.18561	0.16734	0.079456	0.042242	0.13547	0.11319	0.28009	0.065576	0.12683	0.36701	0.19163	0.15237	0.19106	0.32431	0.2864	0.37208	0.073026	0.35243	0.24282	0.27087	0.33845	0.56304	0.25419	0.47906	0.28049
Q8TBC4	0.075855	0.070282	0.26658	0.026348	0.092702	0.094234	0.024934	0.021382	0.053861	0.052322	0.055408	0.037602	0.04239	0.052197	0.069937	0.021867	0.016731	0.011308	0.036669	0.015914	0.12047	0.10546	0.1537	0.11144	0.028239	0.031491	0.033379	0.0020283	0.044347	0.15388	0.070108	0.036378	0.020044	0.22448	0.088208	0.060755	0.039518	0.20674	0.14651	0.16168	0.037656	0.13937	0.15664	0.27821	0.21884	0.49006	0.13782	0.39247	0.39045
Q9UNZ2	0.05537	0.097263	0.24094	0.027273	0.16747	0.090079	0.032379	0.029347	0.07611	0.076762	0.095008	0.065584	0.10453	0.10682	0.086204	0.026025	0.030965	0.011273	0.024771	0.037354	0.15018	0.20127	0.18952	0.11288	0.033359	0.03178	0.047043	0.0018585	0.07621	0.13753	0.13863	0.033487	0.033595	0.24481	0.19773	0.15756	0.10231	0.26348	0.21237	0.22272	0.094882	0.10384	0.10522	0.18281	0.17693	0.39505	0.1111	0.18965	0.26068
P42229	0.070626	0.059497	0.20711	0.036283	0.10479	0.1993	0.054895	0.041119	0.1159	0.077005	0.077089	0.047657	0.06153	0.068523	0.030417	0.054329	0.055029	0.053976	0.056975	0.010024	0.10428	0.049808	0.087007	0.10538	0.028079	0.037685	0.024173	0.000344	0.056754	0.09988	0.073946	0.041897	0.011834	0.1474	0.049884	0.024001	0.028518	0.12381	0.11317	0.080754	0.0050971	0.1249	0.16443	0.33927	0.27918	0.27242	0.14285	0.1987	0.40488
Q13131	0.10758	0.091093	0.22734	0.069793	0.27556	0.12352	0.068688	0.067331	0.16966	0.12598	0.13521	0.1381	0.082079	0.12475	0.10212	0.042204	0.062947	0.076736	0.094156	0.094733	0.24413	0.34811	0.1914	0.24112	0.11688	0.070041	0.030255	0.01888	0.12047	0.11078	0.089696	0.12009	0.14721	0.28931	0.24401	0.12824	0.14529	0.3422	0.33812	0.25447	0.03634	0.15955	0.091712	0.11492	0.10659	0.28801	0.076777	0.15661	0.12767
Q13405	0.0082852	0.0079364	0.031544	0.002834	0.035745	0.027496	0.0068425	0.0080428	0.0082769	0.011524	0.0057297	0.01822	0.010543	0.010749	0.032888	0.0038427	0.0062666	0.0080673	0.013992	0.0041536	0.016765	0.08958	0.023688	0.022866	0.012101	0.0042017	0.001098	0.0073621	0.0082671	0.0058846	0.00075367	0.013902	0.023336	0.05084	0.012357	0.020942	0.0095097	0.032114	0.11941	0.061876	0.0047321	0.048106	0.027149	0.06226	0.045851	0.058338	0.018939	0.19899	0.12668
Q9HB71	0.014889	0.076949	0.094116	0.029016	0.1648	0.076205	0.027351	0.019619	0.054062	0.030135	0.031592	0.051804	0.045549	0.034941	0.025795	0.011259	0.012792	0.010924	0.019829	0.030661	0.044898	0.082736	0.035306	0.064287	0.042483	0.055772	0.018486	0.024142	0.052919	0.011019	0.099084	0.017523	0.033327	0.093419	0.024282	0.037386	0.032081	0.043551	0.083438	0.13588	0.016741	0.17443	0.11293	0.15861	0.18297	0.13416	0.099158	0.18046	0.23925
Q9Y2R0	0.080272	0.062363	0.16464	0.034442	0.11379	0.070033	0.070618	0.070105	0.095318	0.10206	0.073506	0.11061	0.074254	0.099642	0.099105	0.062273	0.089816	0.049938	0.03966	0.035238	0.097827	0.22349	0.071998	0.16088	0.063831	0.031261	0.012055	0.011002	0.10576	0.036793	0.022165	0.087616	0.076019	0.27942	0.080646	0.073404	0.058417	0.11803	0.23761	0.2644	0.028788	0.21531	0.10833	0.21403	0.13554	0.16295	0.073406	0.10373	0.30657
Q7L0Y3	0.0004443	0.0055349	0.017768	0.0015768	0.02857	0.037112	0.0022591	0.0017957	0.0072715	0.0038339	0.0041591	0.0027276	0.0050186	0.0046819	0.0060669	0.0018384	0.001961	0.00044136	0.0011072	0.0019859	0.008505	0.01332	0.0079201	0.0033059	0.00054618	0.004234	0.020076	0.0045274	0.0062506	0.0024301	0.041994	0.00018112	0.001608	0.0087314	0.005273	0.0040581	0.0016943	0.0053996	0.0095406	0.0079374	0.0053045	0.010686	0.012935	0.042469	0.041112	0.04687	0.021813	0.089426	0.10177
O43447	0.010168	0.023869	0.062334	0.0074806	0.065975	0.045714	0.0086011	0.0065565	0.023355	0.012081	0.011845	0.014203	0.010662	0.011947	0.017706	0.0047596	0.004298	0.0058928	0.013389	0.006946	0.028257	0.043772	0.025202	0.026149	0.0090663	0.014664	0.010394	0.0069666	0.012176	0.012657	0.047312	0.0075246	0.010787	0.042955	0.011321	0.01048	0.0068597	0.032314	0.052709	0.066249	0.0073973	0.073615	0.047329	0.10819	0.10439	0.12613	0.060527	0.19127	0.19187
P51553	0.014402	0.020155	0.070345	0.0050823	0.06315	0.0395	0.016215	0.015022	0.040322	0.026665	0.029335	0.023801	0.023918	0.030615	0.036732	0.019658	0.02541	0.012146	0.0072609	0.0076334	0.038553	0.075997	0.03264	0.031047	0.0047969	0.0045886	0.023236	0.0030467	0.020696	0.032382	0.061641	0.012513	0.0088638	0.05371	0.043925	0.020219	0.014717	0.040536	0.07014	0.091347	0.026315	0.045992	0.026237	0.10867	0.090716	0.12747	0.068258	0.074061	0.1793
P33316	0.022502	0.069401	0.15428	0.022589	0.17585	0.051464	0.028547	0.023289	0.060965	0.061016	0.065013	0.072069	0.090724	0.085646	0.04051	0.017481	0.022131	0.0045138	0.012296	0.045995	0.14277	0.16343	0.16117	0.11075	0.046356	0.045654	0.016282	0.0033821	0.086386	0.049337	0.10518	0.027598	0.042976	0.21955	0.13015	0.11838	0.069901	0.18504	0.17862	0.16038	0.029168	0.091241	0.099829	0.11375	0.10626	0.20681	0.043665	0.085636	0.12924
Q9BRX8	0.024235	0.08204	0.16887	0.022136	0.13415	0.13021	0.020015	0.013424	0.043785	0.031636	0.036116	0.032588	0.056709	0.036081	0.025659	0.0080817	0.0086976	0.0079151	0.022466	0.0085954	0.045818	0.064896	0.059294	0.066982	0.03002	0.03103	0.01075	0.0005523	0.032626	0.035773	0.048354	0.010754	0.0098005	0.14705	0.031079	0.047823	0.038968	0.09214	0.11328	0.12135	0.01182	0.15128	0.16578	0.27635	0.29725	0.28789	0.13798	0.35401	0.38596
Q9P016	0.014853	0.036739	0.12723	0.012541	0.14481	0.092336	0.037694	0.030598	0.075776	0.057035	0.054656	0.042044	0.051301	0.054721	0.045087	0.032652	0.036401	0.0079613	0.0088624	0.013801	0.08802	0.096489	0.081337	0.066085	0.014618	0.01569	0.021925	0.0019688	0.033257	0.02909	0.088789	0.0075112	0.011185	0.12191	0.044522	0.027366	0.015656	0.060915	0.10852	0.086501	0.010813	0.055745	0.06346	0.16075	0.12631	0.16295	0.05694	0.092828	0.13173
Q03519	0.027858	0.025699	0.097179	0.0090891	0.027376	0.014783	0.0040634	0.003293	0.0090194	0.011262	0.011498	0.021893	0.017618	0.017185	0.012617	0.0034005	0.0022829	0.0033985	0.017958	0.011081	0.058253	0.040943	0.094288	0.05536	0.022492	0.027272	0.0055489	0.0030316	0.036933	0.098124	0.019278	0.061404	0.021492	0.095984	0.059115	0.047282	0.029427	0.14793	0.078354	0.082594	0.012125	0.095098	0.11795	0.11948	0.10205	0.24531	0.055836	0.24437	0.28124
O43615	0.015412	0.020637	0.090178	0.006581	0.029725	0.021084	0.0021618	0.0019037	0.0058643	0.0046614	0.0062405	0.009829	0.0045498	0.004103	0.020954	0.0012258	0.00073526	0.0016687	0.0085085	0.0043424	0.019599	0.039217	0.033132	0.037022	0.01217	0.0096874	0.012899	0.0098989	0.012846	0.060863	0.010224	0.017966	0.0092504	0.066038	0.028978	0.018026	0.017834	0.05739	0.040988	0.074643	0.017264	0.098803	0.087971	0.13875	0.1272	0.32311	0.10769	0.50139	0.30879
P62495	0.01536	0.009276	0.05514	0.002795	0.027164	0.013556	0.0041542	0.0037598	0.0090796	0.0074814	0.0071106	0.011391	0.0062598	0.0070966	0.018028	0.0049523	0.0033543	0.0076247	0.015543	0.0050455	0.040328	0.038505	0.06671	0.027947	0.010216	0.0068667	0.0048823	0.0064232	0.005993	0.066334	0.014812	0.031255	0.012519	0.039653	0.028371	0.013836	0.0082036	0.075254	0.077469	0.058099	0.0079072	0.041795	0.049314	0.098736	0.080285	0.17687	0.058181	0.27736	0.16745
Q9BSH5	0.011611	0.00852	0.039438	0.0010768	0.012035	0.0023179	0.0035721	0.0038953	0.0042392	0.0070214	0.0042771	0.010168	0.0064123	0.0083187	0.026522	0.0051868	0.0063082	0.0031922	0.0032957	0.0042087	0.01632	0.061989	0.024262	0.022129	0.0073377	0.0021118	0.0018954	0.0057954	0.0089107	0.013354	0.0044381	0.019644	0.014771	0.077826	0.018922	0.019712	0.0078304	0.039992	0.080718	0.13061	0.024743	0.066331	0.03151	0.10015	0.05571	0.10662	0.040911	0.13727	0.25297
P41240	0.0036618	0.013988	0.046162	0.0015607	0.014163	0.015667	0.0030767	0.002295	0.0038796	0.0042166	0.0037377	0.0074877	0.010378	0.0059122	0.011685	0.0035161	0.0027179	0.00046816	0.0010615	0.00084226	0.0051659	0.013419	0.0096882	0.010808	0.0018111	0.0033286	0.0083902	0.0019252	0.011558	0.015472	0.012856	0.0045482	0.0011181	0.032162	0.0058183	0.0093378	0.0038723	0.0078965	0.017227	0.050402	0.012352	0.070353	0.067381	0.17163	0.14224	0.12881	0.07928	0.18845	0.3792
P53990	0.00959	0.0074414	0.041671	0.0034174	0.013004	0.035613	0.010393	0.010865	0.013524	0.021267	0.014286	0.024586	0.029664	0.030128	0.015404	0.015906	0.025199	0.0057979	0.0038942	0.0018477	0.016086	0.032706	0.016463	0.02349	0.0028948	0.0038272	0.0065418	0.00028735	0.04981	0.022547	0.0029463	0.021677	0.0051922	0.048826	0.029409	0.022774	0.013463	0.021945	0.040321	0.028185	0.0049039	0.039034	0.041467	0.09626	0.059291	0.053544	0.021015	0.03513	0.24302
O43175	0.010748	0.02212	0.035169	0.0069621	0.018023	0.014829	0.00064702	0.00068883	0.0044661	0.0056947	0.010154	0.0021049	0.014708	0.017364	0.0064062	0.00067075	0.0013847	0.0034785	0.013961	0.025687	0.04408	0.04576	0.067634	0.0086201	0.0092797	0.023963	0.02942	0.004356	0.024421	0.026005	0.086553	0.00754	0.03357	0.061622	0.11503	0.10793	0.067789	0.23284	0.062275	0.044187	0.10507	0.015385	0.021144	0.027279	0.031529	0.13891	0.031947	0.15455	0.22945
O75832	0.0031438	0.0024914	0.015437	0.0031512	0.006398	0.01474	0.001174	0.0010138	0.0078133	0.0035524	0.0065717	0.0014752	0.00237	0.0040187	0.00091653	0.0029306	0.0067316	0.007231	0.0018827	0.0034492	0.011582	0.0076814	0.0062023	0.0089364	0.0025395	0.0038519	0.019001	0.0018232	0.019829	0.012219	0.01715	0.0056832	0.0046296	0.021746	0.043003	0.0056715	0.017347	0.034774	0.00783	0.006293	0.0066936	0.009595	0.013893	0.039984	0.028029	0.065445	0.035093	0.053193	0.18086
P46109	0.0076705	0.01116	0.027161	0.012407	0.025689	0.026311	0.0018053	0.0017854	0.01385	0.0082924	0.014079	0.0052508	0.0077209	0.013855	0.0029728	0.0015177	0.0041447	0.0076035	0.010237	0.023412	0.038561	0.036968	0.025183	0.019183	0.011353	0.024392	0.028762	0.0074859	0.048084	0.014219	0.048744	0.011172	0.032623	0.045889	0.097529	0.03721	0.054064	0.11785	0.028622	0.017333	0.020952	0.017572	0.016605	0.017617	0.017795	0.080352	0.019943	0.063644	0.12534
P55795	0.023967	0.010181	0.042555	0.0059028	0.020123	0.010688	0.0049349	0.0050395	0.019039	0.017732	0.022661	0.010661	0.017023	0.026685	0.0078147	0.0091896	0.019921	0.027705	0.014925	0.017708	0.065237	0.062482	0.064667	0.035875	0.018043	0.0089661	0.0074427	0.0010072	0.032704	0.0468	0.024234	0.044313	0.0346	0.096189	0.14633	0.054604	0.063692	0.21829	0.10807	0.063186	0.02672	0.02157	0.022951	0.050034	0.034187	0.10989	0.034022	0.053671	0.17609
Q8N1G4	0.036774	0.014208	0.044326	0.011545	0.016938	0.0076329	0.0043534	0.0057824	0.017856	0.019724	0.026193	0.011995	0.014485	0.032963	0.01669	0.00875	0.020746	0.028695	0.019315	0.043219	0.07507	0.10504	0.06426	0.040632	0.022976	0.016323	0.027044	0.011044	0.06223	0.0509	0.039102	0.060297	0.080514	0.11902	0.22773	0.094525	0.10541	0.27041	0.10242	0.089003	0.095264	0.029258	0.016759	0.029436	0.017829	0.12595	0.032691	0.0569	0.19696
Q00059	0.0076	0.036194	0.04324	0.024057	0.043319	0.018556	0.0037477	0.0029967	0.021177	0.0082625	0.021637	0.010366	0.011345	0.012344	0.0047674	0.0028094	0.0089736	0.007266	0.0021572	0.03478	0.014925	0.04391	0.0050635	0.03637	0.023911	0.025678	0.068432	0.030175	0.093017	0.0097101	0.081118	0.011191	0.029145	0.086278	0.11123	0.040859	0.11328	0.055406	0.013446	0.072342	0.078274	0.088863	0.042905	0.065833	0.073677	0.14877	0.11949	0.09327	0.32137
O00182	0.024485	0.032809	0.042395	0.0069889	0.027536	0.0062461	0.0060262	0.0034379	0.021622	0.0072886	0.010733	0.0045178	0.0080902	0.009951	0.0039721	0.0081743	0.0097762	0.037301	0.020627	0.017103	0.0311	0.022202	0.023267	0.020629	0.021689	0.019511	0.0070392	0.0075028	0.0094108	0.01261	0.13371	0.024528	0.022591	0.064276	0.022003	0.014115	0.018237	0.097946	0.065764	0.15862	0.038963	0.098728	0.050905	0.16681	0.14999	0.12797	0.1582	0.13841	0.45384
O96000	0.02706	0.028499	0.044744	0.015156	0.046744	0.02809	0.015689	0.012286	0.050671	0.022186	0.027004	0.010838	0.0143	0.023467	0.0092937	0.018059	0.034629	0.064483	0.02392	0.023848	0.038701	0.052416	0.016255	0.034404	0.025759	0.019143	0.014865	0.008456	0.027479	0.0066875	0.086183	0.021038	0.03668	0.088467	0.042619	0.018665	0.034987	0.088626	0.078043	0.1138	0.030205	0.076844	0.031321	0.11702	0.092893	0.083906	0.098466	0.070597	0.31945
O00264	0.0049856	0.015969	0.036403	0.0063576	0.0046587	0.0082122	0.0012193	0.00062282	0.004551	0.0025337	0.0049792	0.001288	0.0045882	0.003756	0.00060903	0.0023474	0.0038415	0.0016809	0.00059385	0.0038727	0.0053303	0.0031683	0.0031835	0.013277	0.0061014	0.011759	0.020484	0.0020148	0.036851	0.0071661	0.03341	0.0042488	0.0028338	0.068357	0.021131	0.0093445	0.021475	0.026975	0.0039208	0.031865	0.02225	0.071383	0.076244	0.16186	0.11775	0.14042	0.11397	0.11723	0.58776
Q96I24	0.011633	0.024903	0.035308	0.0058936	0.025348	0.010295	0.0081146	0.0057291	0.021468	0.020402	0.025525	0.008036	0.046738	0.041823	0.0028301	0.014151	0.032502	0.019472	0.0058389	0.020923	0.047153	0.03607	0.046132	0.021443	0.019632	0.015296	0.0061826	0.00020096	0.040525	0.0094244	0.079571	0.014543	0.021817	0.12576	0.090575	0.072446	0.063391	0.16384	0.095001	0.086653	0.043301	0.029479	0.038553	0.10015	0.07699	0.064072	0.04995	0.021065	0.3086
Q9UNF0	0.018493	0.013033	0.050367	0.0063108	0.015495	0.02066	0.011869	0.0088916	0.02718	0.02148	0.023888	0.007646	0.021387	0.023137	0.004067	0.024467	0.046405	0.032075	0.005988	0.0059487	0.031313	0.021457	0.023352	0.034317	0.015481	0.0064037	0.0060457	0.0001238	0.031083	0.017791	0.01993	0.018959	0.0088964	0.12398	0.054925	0.019042	0.033561	0.090629	0.060943	0.056025	0.011551	0.041274	0.055249	0.18311	0.11033	0.10147	0.081868	0.053957	0.38929
O60884	0.0072009	0.01968	0.082803	0.0031876	0.0084305	0.022699	0.0016964	0.0012917	0.0050953	0.0063973	0.0096815	0.0021446	0.011546	0.010339	0.0092318	0.0031204	0.0038991	0.00022111	0.00042017	0.0012201	0.0091334	0.013687	0.012537	0.012924	0.0011427	0.0033068	0.031806	8.4121e-05	0.025211	0.02469	0.02972	0.0012124	0.00067789	0.091123	0.03176	0.022304	0.016851	0.036724	0.011923	0.04573	0.046167	0.048596	0.060957	0.18333	0.12929	0.25083	0.096163	0.16621	0.54011
P15311	0.0032614	0.01381	0.050704	0.0036116	0.013161	0.024161	0.0012723	0.0009518	0.0062206	0.0059337	0.010801	0.002406	0.012649	0.011026	0.0035653	0.001822	0.0036011	0.00036658	0.00043988	0.0026609	0.012098	0.014557	0.013278	0.011489	0.001785	0.0048166	0.026759	9.9176e-05	0.031475	0.016279	0.032647	0.0011849	0.0015604	0.065711	0.050328	0.026725	0.027574	0.046326	0.011985	0.022683	0.027313	0.023347	0.037439	0.089892	0.07308	0.1575	0.05249	0.089124	0.32102
P41227	0.0057556	0.01828	0.059851	0.0030302	0.021304	0.012821	0.0020957	0.0014184	0.007229	0.0089316	0.011986	0.0045402	0.020942	0.017341	0.004268	0.0024619	0.0039437	0.00068917	0.0014923	0.0056185	0.03184	0.026385	0.046536	0.019262	0.0064907	0.00831	0.0066924	4.0496e-05	0.023713	0.018688	0.036788	0.0038685	0.005061	0.10793	0.054758	0.044832	0.027927	0.10715	0.048357	0.051663	0.021482	0.02863	0.050225	0.098056	0.076061	0.1538	0.038939	0.086388	0.26323
Q15020	0.0098787	0.013626	0.032836	0.0059029	0.016544	0.014696	0.0038369	0.0030435	0.013961	0.010923	0.013211	0.0061107	0.014651	0.017632	0.0027541	0.004794	0.012344	0.010752	0.0051197	0.0088291	0.022282	0.028663	0.015024	0.021128	0.01094	0.0099907	0.0057887	0.00046317	0.036191	0.0069025	0.022857	0.011836	0.014828	0.083862	0.050372	0.029148	0.03698	0.083043	0.045434	0.049715	0.015225	0.039031	0.030741	0.072662	0.052961	0.069936	0.037035	0.041193	0.28099
Q8WXF1	0.0069318	0.0042889	0.020348	0.0018058	0.010951	0.017591	0.0030979	0.002911	0.009816	0.0081812	0.0069085	0.004303	0.0074458	0.010784	0.004082	0.0042809	0.009857	0.012004	0.006592	0.0022634	0.014911	0.025295	0.01134	0.010916	0.0035447	0.0027067	0.0019712	0.00017601	0.011739	0.0052302	0.0060893	0.0083596	0.0079001	0.038333	0.020907	0.011414	0.010655	0.045387	0.049047	0.027264	0.0040674	0.019184	0.013985	0.053665	0.034794	0.040983	0.01899	0.044733	0.1893
Q9BQA1	0.025082	0.03391	0.098435	0.013852	0.096623	0.043411	0.02515	0.020315	0.070456	0.058698	0.072435	0.045341	0.082451	0.087341	0.014993	0.03061	0.049827	0.023511	0.014404	0.029748	0.1376	0.092852	0.13521	0.076366	0.027457	0.022813	0.013736	0.00022085	0.073445	0.07205	0.10058	0.041726	0.027331	0.14544	0.18157	0.086425	0.077514	0.22413	0.15296	0.089067	0.019557	0.034434	0.055342	0.095711	0.083371	0.13592	0.043079	0.024979	0.13531
O00743	0.021561	0.030635	0.095505	0.0051829	0.027982	0.031717	0.0077809	0.0052058	0.019065	0.018108	0.021694	0.010473	0.036465	0.027748	0.008078	0.010017	0.013746	0.0097642	0.0087051	0.003369	0.034483	0.027391	0.049165	0.032271	0.010496	0.008039	0.0047059	3.1089e-06	0.022211	0.044763	0.031299	0.015619	0.0042424	0.11976	0.0467	0.039022	0.031249	0.11862	0.084577	0.091109	0.016849	0.064659	0.090954	0.22825	0.19028	0.20268	0.10227	0.13776	0.45653
Q5R3I4	0.015332	0.011254	0.06007	0.0022064	0.021705	0.017246	0.0101	0.0087016	0.024823	0.023836	0.022852	0.0072933	0.020543	0.031022	0.016111	0.02264	0.029032	0.0097886	0.0049723	0.0055687	0.054939	0.040179	0.056619	0.02029	0.0032737	0.0035999	0.011401	0.00013717	0.014351	0.02752	0.063042	0.0083427	0.0061928	0.084498	0.046985	0.021266	0.0098273	0.089028	0.076552	0.066496	0.02445	0.019249	0.023404	0.11652	0.064788	0.11135	0.041399	0.039837	0.22292
Q9Y277	0.010683	0.04642	0.069941	0.017029	0.070413	0.044773	0.010789	0.0083302	0.035617	0.023572	0.03643	0.025624	0.046804	0.039387	0.0093174	0.0073855	0.018991	0.0081589	0.004093	0.018002	0.026075	0.063404	0.01623	0.044592	0.018723	0.018988	0.023164	0.0014489	0.087119	0.013286	0.058331	0.012104	0.016408	0.11396	0.089584	0.062852	0.088253	0.069457	0.049333	0.09282	0.035644	0.086166	0.057848	0.10498	0.1129	0.12341	0.079035	0.052695	0.30066
O00534	0.03858	0.048374	0.1011	0.022123	0.083941	0.046044	0.027831	0.02447	0.084009	0.057338	0.074742	0.027765	0.050471	0.072621	0.02697	0.034396	0.06797	0.043039	0.015402	0.038263	0.086184	0.12054	0.051481	0.069211	0.028267	0.019792	0.03692	0.0025279	0.072923	0.027454	0.12876	0.023806	0.039402	0.19085	0.15289	0.069817	0.089805	0.17415	0.12397	0.15828	0.073683	0.068137	0.038877	0.12526	0.095329	0.15628	0.091554	0.041195	0.27991
Q7L2H7	0.03703	0.075826	0.12675	0.042471	0.11384	0.090464	0.024066	0.02004	0.08272	0.060363	0.095448	0.048413	0.09753	0.096654	0.016333	0.020333	0.047024	0.031988	0.019734	0.046678	0.091166	0.11049	0.067073	0.092558	0.043784	0.044141	0.047668	0.0011149	0.15756	0.061826	0.1154	0.039806	0.04151	0.19323	0.25428	0.14274	0.20299	0.2361	0.10938	0.11274	0.061427	0.083083	0.080608	0.11501	0.12744	0.20038	0.096572	0.055856	0.29788
P05166	0.012408	0.030543	0.067428	0.010793	0.025783	0.024423	0.0060742	0.0038983	0.020411	0.011249	0.018371	0.005672	0.014475	0.012827	0.00409	0.0067824	0.014556	0.0094116	0.0025824	0.0068334	0.013914	0.022044	0.0079421	0.033356	0.015557	0.0102	0.015358	0.00079448	0.037571	0.0091711	0.035443	0.0064449	0.0066787	0.13203	0.041393	0.019937	0.044784	0.056536	0.028515	0.082744	0.02663	0.093014	0.074265	0.2013	0.1593	0.1753	0.14125	0.12522	0.51478
Q06210	0.0039783	0.0083536	0.024483	0.002714	0.009564	0.032504	0.0029985	0.0020077	0.010481	0.0051744	0.0074149	0.00068591	0.0059954	0.005311	0.0018936	0.0054256	0.011887	0.011244	0.0023199	0.0011559	0.0052065	0.0067125	0.0031957	0.0055086	0.0024294	0.0023554	0.011751	0.00018148	0.007445	0.0026339	0.021878	0.00073697	0.0014148	0.040572	0.01206	0.0052383	0.011113	0.023153	0.016114	0.020315	0.012074	0.021976	0.025986	0.14397	0.10718	0.07836	0.089408	0.11168	0.41662
Q9BT78	0.010004	0.015188	0.056496	0.0034314	0.0066641	0.035604	0.0034231	0.0017956	0.0068016	0.0042489	0.0038456	0.0017689	0.0057189	0.0037238	0.0022071	0.0041622	0.0042105	0.00504	0.0045292	0.00018538	0.0037995	0.0026508	0.0037652	0.011908	0.003275	0.0049173	0.0031463	3.3133e-05	0.0081555	0.0076116	0.0076757	0.0033378	0.00045742	0.054049	0.0018309	0.0024165	0.0032928	0.014805	0.014396	0.034901	0.0024211	0.094161	0.10436	0.31283	0.23222	0.14684	0.12854	0.25185	0.68738
O94925	0.016971	0.012038	0.039567	0.0054624	0.033743	0.024285	0.010448	0.008047	0.036053	0.015896	0.018167	0.0072596	0.0087133	0.014182	0.0068528	0.013891	0.024816	0.042381	0.014042	0.0071379	0.031549	0.035728	0.017029	0.026554	0.011984	0.0058705	0.0054024	0.0012863	0.01116	0.0095789	0.036807	0.01421	0.013552	0.062557	0.028519	0.0078866	0.01523	0.065998	0.070611	0.068962	0.0081295	0.041768	0.023748	0.11183	0.081062	0.082313	0.071011	0.070446	0.23424
P12955	0.015949	0.034666	0.087372	0.0090834	0.030386	0.035806	0.0043746	0.0020153	0.018073	0.0050401	0.0094367	0.0026547	0.0049613	0.0037863	0.0034489	0.0036508	0.0032148	0.0098593	0.0087404	0.002481	0.012663	0.007848	0.010117	0.025	0.011248	0.012376	0.012318	0.0011624	0.0080614	0.019341	0.058825	0.005254	0.0022321	0.069355	0.0091126	0.0040618	0.011192	0.04162	0.021694	0.076245	0.010677	0.12328	0.1104	0.30377	0.281	0.28106	0.23987	0.37326	0.5964
Q96PK6	0.010107	0.032887	0.067784	0.018045	0.040263	0.059281	0.005115	0.003146	0.024714	0.0075682	0.015012	0.0057363	0.006914	0.0068184	0.0041078	0.0031447	0.0053008	0.008013	0.0054864	0.0060591	0.0099427	0.0156	0.0036207	0.028614	0.011008	0.017491	0.034591	0.0047054	0.034109	0.0099497	0.052045	0.0043256	0.0053495	0.061795	0.022216	0.0078934	0.02846	0.026895	0.011026	0.045767	0.014417	0.10707	0.072368	0.16514	0.16491	0.19146	0.15613	0.2128	0.44615
P61313	0.020566	0.017009	0.050153	0.0093155	0.01597	0.013484	0.00090683	0.00071575	0.0069639	0.0028376	0.0056742	0.0023348	0.0016922	0.0029262	0.0044279	0.00063658	0.0009448	0.011417	0.017739	0.0092564	0.019754	0.025431	0.017861	0.024451	0.017241	0.014853	0.011946	0.0084368	0.012763	0.02765	0.022141	0.019095	0.02093	0.062388	0.042284	0.016336	0.033943	0.11566	0.036014	0.062057	0.023743	0.07198	0.046748	0.08582	0.080048	0.22746	0.10284	0.34951	0.35977
Q8N163	0.016657	0.0076702	0.027936	0.0060484	0.010599	0.0098725	0.0029804	0.0024076	0.01239	0.0044266	0.0059379	0.0041001	0.00157	0.0031474	0.0030314	0.0039551	0.0079612	0.031247	0.011044	0.0049181	0.01054	0.018724	0.0043224	0.025253	0.014299	0.0059893	0.0048241	0.0064999	0.014101	0.010438	0.0076943	0.026979	0.015527	0.048139	0.02237	0.0043055	0.018757	0.043669	0.029043	0.054989	0.0070268	0.073219	0.03334	0.10185	0.072915	0.10114	0.091245	0.14705	0.34565
Q9ULA0	0.037262	0.021902	0.062269	0.012124	0.023093	0.014952	0.005067	0.0043534	0.02031	0.012919	0.016602	0.0059114	0.0072963	0.013637	0.0087208	0.0058558	0.011377	0.03338	0.024073	0.017702	0.043746	0.053565	0.032954	0.042698	0.030548	0.016148	0.0082003	0.0040137	0.022846	0.021436	0.028594	0.029962	0.038971	0.13696	0.069299	0.030597	0.049542	0.18264	0.092284	0.10993	0.031753	0.073861	0.044391	0.10947	0.076486	0.17631	0.085771	0.17801	0.35943
P09668	0.034523	0.014167	0.026587	0.013529	0.024189	0.001855	0.0034533	0.0034263	0.01497	0.0065067	0.0082365	0.0084164	0.0016474	0.0057192	0.0074481	0.003313	0.0070983	0.056222	0.035888	0.051572	0.047234	0.07987	0.027647	0.050085	0.069078	0.026925	0.0048851	0.070309	0.020701	0.01211	0.024703	0.080371	0.13168	0.096392	0.072856	0.024481	0.053896	0.17941	0.10396	0.14557	0.03416	0.091351	0.026309	0.042512	0.029861	0.10543	0.064386	0.16932	0.20432
O75131	0.060863	0.036945	0.061962	0.029491	0.023135	0.011257	0.0017869	0.0015219	0.0085157	0.0039291	0.0057227	0.0077967	0.0020587	0.0040204	0.0073023	0.00062292	0.00068438	0.037296	0.083936	0.036417	0.037533	0.048663	0.035031	0.055127	0.079852	0.065278	0.007837	0.059126	0.025612	0.038938	0.020316	0.096521	0.10675	0.096569	0.050964	0.035646	0.065825	0.2225	0.083001	0.13354	0.032431	0.19147	0.097867	0.09266	0.094378	0.25522	0.12597	0.56735	0.44775
P49721	0.056767	0.022345	0.05608	0.025691	0.036757	0.014354	0.0054721	0.0047308	0.024719	0.010383	0.013736	0.01302	0.0033771	0.0084891	0.0073581	0.0039425	0.0056217	0.069091	0.077438	0.0407	0.070794	0.060595	0.051323	0.071797	0.077048	0.048059	0.0068386	0.037883	0.026803	0.043912	0.027828	0.10675	0.10447	0.094423	0.075987	0.024494	0.057419	0.2341	0.10814	0.10264	0.01416	0.11048	0.061585	0.072588	0.063307	0.18181	0.086252	0.29586	0.24639
P53367	0.013116	0.0030912	0.025264	0.00076881	0.0059568	0.0033375	0.00068314	0.00082358	0.0026278	0.0016055	0.0016492	0.00070426	0.00025099	0.00096424	0.014595	0.0015194	0.001407	0.010537	0.011275	0.0025504	0.014116	0.030176	0.019897	0.0080567	0.0038496	0.0011754	0.0051412	0.011633	0.00053844	0.020055	0.0082661	0.010024	0.011731	0.029064	0.014594	0.0045149	0.0038288	0.059717	0.052653	0.06077	0.02427	0.025117	0.012117	0.069621	0.042473	0.15381	0.066587	0.35106	0.23224
Q02750	0.026823	0.012967	0.04547	0.013147	0.019979	0.015273	0.0013615	0.0010646	0.0072644	0.0021597	0.0032598	0.00452	0.00054098	0.0012415	0.0050747	0.00074204	0.00037749	0.019841	0.048235	0.012489	0.029577	0.019815	0.029769	0.032688	0.029882	0.031394	0.0091032	0.044729	0.0084586	0.048234	0.017697	0.050756	0.036729	0.032077	0.022301	0.0065097	0.015644	0.099573	0.037421	0.044052	0.0064132	0.090892	0.068208	0.079913	0.078854	0.22057	0.098523	0.54	0.26377
O94874	0.024654	0.0074536	0.04576	0.0052064	0.0066756	0.009023	0.00090018	0.00089309	0.0040117	0.0017261	0.0027111	0.0027866	0.00041267	0.0011008	0.0092843	0.001466	0.00081343	0.011901	0.020543	0.0041597	0.015824	0.015532	0.019082	0.02046	0.0083616	0.0082525	0.016558	0.025194	0.006511	0.074126	0.011313	0.039716	0.013482	0.025525	0.024454	0.0050477	0.010312	0.061253	0.022041	0.043817	0.016771	0.068423	0.049145	0.1004	0.080567	0.25276	0.11908	0.47564	0.35326
P67870	0.035252	0.014866	0.073871	0.0095359	0.021192	0.020229	0.0024118	0.0023866	0.0090964	0.0059332	0.0077617	0.0073569	0.0027102	0.0047588	0.016091	0.0021493	0.0017372	0.01568	0.034328	0.0087696	0.037729	0.042062	0.049494	0.040215	0.020652	0.014536	0.011275	0.013507	0.011291	0.08242	0.011685	0.04588	0.026329	0.062821	0.048767	0.018522	0.02552	0.13493	0.067123	0.066348	0.016737	0.074324	0.063418	0.10254	0.086979	0.28469	0.09581	0.4777	0.28867
Q9UKK9	0.020232	0.021303	0.065822	0.013851	0.036573	0.021312	0.0018252	0.001541	0.0099103	0.004574	0.0063753	0.0069226	0.0019713	0.0037523	0.010069	0.00054337	0.00052562	0.0062867	0.022938	0.013692	0.029994	0.046452	0.026545	0.040781	0.025416	0.025723	0.010133	0.020604	0.016417	0.02358	0.019266	0.020921	0.032867	0.07094	0.031036	0.015923	0.024371	0.097579	0.047727	0.069649	0.01208	0.10013	0.057746	0.072143	0.068683	0.22832	0.069099	0.3972	0.23701
P23588	0.032772	0.04001	0.091867	0.027247	0.072216	0.02662	0.0040408	0.0047998	0.021484	0.016276	0.024196	0.014305	0.0087078	0.019576	0.035576	0.0015868	0.0031001	0.0084035	0.026452	0.057957	0.076019	0.16711	0.064966	0.063541	0.041928	0.03886	0.040987	0.041714	0.047492	0.030934	0.05833	0.022575	0.097209	0.15823	0.14702	0.086284	0.094972	0.23567	0.1053	0.12999	0.090977	0.079593	0.034232	0.037407	0.03514	0.2647	0.052087	0.28199	0.17066
O75844	0.045572	0.032477	0.10852	0.020221	0.060985	0.030525	0.0063433	0.0056615	0.028048	0.014513	0.020039	0.014071	0.0057178	0.011751	0.023292	0.0036673	0.0042003	0.021021	0.038465	0.023215	0.066226	0.087656	0.057569	0.07275	0.039047	0.026587	0.015858	0.016294	0.021979	0.05401	0.038091	0.038852	0.047372	0.12378	0.071294	0.027926	0.043202	0.18003	0.10068	0.12492	0.024898	0.10965	0.063374	0.1049	0.091555	0.30674	0.10144	0.36969	0.25047
P63279	0.032108	0.030793	0.087772	0.019963	0.06989	0.028229	0.0061135	0.0055344	0.032645	0.0161	0.026384	0.014593	0.0085419	0.015578	0.017178	0.0036622	0.0067652	0.021372	0.024415	0.029811	0.063842	0.099321	0.047686	0.068605	0.038719	0.022923	0.019356	0.012419	0.03185	0.03964	0.04649	0.030663	0.049941	0.12671	0.11129	0.0391	0.071041	0.18701	0.095052	0.11367	0.032284	0.079995	0.043614	0.073352	0.069394	0.24838	0.085924	0.22944	0.19926
O60762	0.032993	0.032601	0.070877	0.015767	0.06296	0.0065929	0.0024818	0.0024437	0.014713	0.008551	0.017035	0.02016	0.0091577	0.012615	0.015894	0.0012309	0.0019538	0.01638	0.030594	0.051453	0.077423	0.12075	0.092554	0.069938	0.060678	0.031657	0.012642	0.032549	0.03181	0.086398	0.045463	0.083416	0.091474	0.10515	0.17682	0.083704	0.1124	0.28815	0.13098	0.15935	0.058659	0.085871	0.050553	0.044218	0.056449	0.27487	0.08331	0.29157	0.16201
Q9Y285	0.049995	0.038514	0.074428	0.021756	0.074024	0.0081808	0.0062995	0.0067471	0.033717	0.020954	0.03457	0.017669	0.012669	0.027616	0.026029	0.0051053	0.011619	0.040299	0.03776	0.088038	0.11612	0.19251	0.097901	0.077608	0.071407	0.032824	0.021702	0.034406	0.039883	0.045979	0.090456	0.06355	0.14429	0.18166	0.23562	0.10606	0.14054	0.38334	0.1918	0.21995	0.1184	0.071003	0.026503	0.040546	0.03756	0.22731	0.073408	0.16531	0.16411
Q8NBQ5	0.02055	0.0060159	0.026992	0.002546	0.014423	0.0097612	0.0033885	0.0034235	0.0097402	0.005992	0.0040719	0.0049092	0.001893	0.0047966	0.011668	0.0034169	0.0052333	0.029108	0.026273	0.0042871	0.019381	0.045812	0.015721	0.018438	0.010842	0.0041181	0.00093516	0.0051445	0.0035872	0.007922	0.0047762	0.024348	0.024621	0.043528	0.011652	0.0067655	0.0065754	0.06215	0.091838	0.078717	0.0060889	0.052823	0.017971	0.070634	0.045685	0.074814	0.039438	0.17422	0.21914
O15533	0.040085	0.03352	0.12404	0.016383	0.037486	0.039064	0.0097701	0.0074136	0.026761	0.0208	0.021851	0.021044	0.017584	0.022001	0.012755	0.0077528	0.0088475	0.011819	0.020437	0.0084177	0.048403	0.043229	0.044082	0.074055	0.024877	0.023584	0.0069736	0.00092231	0.045426	0.051482	0.019763	0.040517	0.01673	0.14357	0.045775	0.026481	0.031486	0.11812	0.072826	0.09651	0.0078979	0.13424	0.11654	0.18561	0.14195	0.24472	0.084994	0.20066	0.39048
P46778	0.026525	0.023306	0.091356	0.0092403	0.03259	0.029323	0.0053526	0.0044025	0.016688	0.01103	0.011373	0.010882	0.0065009	0.0098698	0.016567	0.0035675	0.0038452	0.0078993	0.015812	0.0054877	0.028249	0.045876	0.025229	0.044546	0.014274	0.012166	0.0069523	0.0028273	0.018121	0.0271	0.015682	0.019064	0.013728	0.096229	0.023768	0.014425	0.015869	0.072616	0.060407	0.094212	0.010347	0.11114	0.06807	0.14472	0.11147	0.22123	0.080506	0.26565	0.33643
P30405	0.014488	0.012175	0.052584	0.0043506	0.033489	0.012562	0.0041639	0.003448	0.014337	0.008161	0.0081487	0.0083552	0.0039783	0.0067222	0.01144	0.0030152	0.0041095	0.008906	0.010305	0.0063277	0.028705	0.050951	0.024268	0.034882	0.014497	0.0068091	0.0025118	0.0036121	0.0089833	0.012862	0.013141	0.015352	0.016921	0.076388	0.021966	0.010073	0.011531	0.066695	0.073027	0.087627	0.0064865	0.066562	0.035026	0.090146	0.065512	0.13808	0.050793	0.17345	0.19246
Q9Y4Z0	0.01793	0.0078296	0.036474	0.0046137	0.035317	0.017997	0.004555	0.0043951	0.018681	0.0095762	0.0091106	0.006922	0.0030386	0.0076959	0.012732	0.0037475	0.0055763	0.0248	0.026952	0.0095989	0.042683	0.062199	0.034201	0.026715	0.014273	0.0076801	0.0031573	0.0064739	0.0056075	0.013853	0.017204	0.019381	0.030368	0.049231	0.027992	0.010126	0.011229	0.096181	0.099383	0.062208	0.0062245	0.034493	0.016202	0.049215	0.03643	0.096626	0.032937	0.15811	0.11915
Q7Z6Z7	0.0023261	0.0082163	0.017743	0.0053442	0.025245	0.020495	0.0011003	0.0006841	0.0065032	0.0013541	0.0023193	0.0042996	0.0013782	0.001118	0.0011074	0.00028963	0.00056831	0.0048087	0.0052477	0.0030904	0.0041982	0.011	0.0019218	0.013423	0.0088032	0.0097677	0.0041995	0.0096163	0.011063	0.00318	0.008289	0.006863	0.0074024	0.014608	0.0068973	0.0026857	0.010295	0.011819	0.010857	0.020088	0.0011676	0.061858	0.034762	0.056004	0.068086	0.070047	0.05608	0.18631	0.1931
P28070	0.012068	0.011822	0.044519	0.0054581	0.020438	0.017514	0.0020157	0.0013352	0.010398	0.0040327	0.005926	0.0056117	0.0033371	0.0040771	0.0027468	0.0014687	0.0018359	0.0088922	0.01094	0.003524	0.016969	0.016206	0.013842	0.025007	0.010148	0.0097348	0.004035	0.0017874	0.01287	0.022961	0.014886	0.01937	0.0081224	0.03953	0.020383	0.0069458	0.014119	0.054304	0.030053	0.042961	0.0033268	0.066628	0.050557	0.097351	0.090676	0.14493	0.071851	0.18879	0.27359
Q13177	0.0077323	0.016983	0.046543	0.0069097	0.054626	0.018425	0.0031508	0.0023787	0.017537	0.0086367	0.013586	0.011722	0.010136	0.01166	0.0052451	0.0016008	0.0031439	0.0054897	0.0072172	0.012606	0.036129	0.050602	0.030434	0.033792	0.015792	0.013141	0.0062232	0.0024937	0.023272	0.017383	0.034059	0.013786	0.018494	0.06166	0.056987	0.025351	0.034069	0.090397	0.057085	0.05806	0.0086744	0.044192	0.032114	0.049012	0.053415	0.12279	0.039711	0.099741	0.12798
Q9NZ08	0.01991	0.0059857	0.018814	0.0095899	0.04544	0.010927	0.01057	0.010724	0.037917	0.017132	0.01695	0.02434	0.0059145	0.015348	0.007727	0.010665	0.023479	0.075493	0.033531	0.03112	0.059308	0.084814	0.02828	0.049618	0.037309	0.015206	0.0029072	0.024112	0.026642	0.012687	0.016396	0.07888	0.084869	0.044562	0.067678	0.014345	0.032289	0.10182	0.10952	0.061353	0.0038283	0.037817	0.012219	0.022528	0.016833	0.03463	0.02081	0.036116	0.06151
Q13217	0.014066	0.015592	0.022016	0.0089822	0.042579	0.010881	0.0074558	0.0062919	0.022606	0.009751	0.0092839	0.015259	0.006607	0.010284	0.0067196	0.004727	0.010502	0.037443	0.021499	0.020653	0.023507	0.061229	0.010767	0.032052	0.032107	0.017185	0.0022312	0.020464	0.020022	0.0026538	0.020634	0.033679	0.054372	0.053132	0.022778	0.014461	0.024108	0.055169	0.082004	0.10247	0.0086606	0.087009	0.025024	0.054654	0.04889	0.043588	0.044417	0.078511	0.17764
Q9HAB8	0.0066507	0.0038309	0.0066275	0.0044699	0.034128	0.020134	0.0048679	0.0049178	0.019035	0.008544	0.0061187	0.0065672	0.0038502	0.0096444	0.0044013	0.0034621	0.0078942	0.04391	0.038362	0.017744	0.035056	0.050445	0.018741	0.009722	0.012854	0.014474	0.0019282	0.016121	0.0071355	0.0010429	0.023558	0.015521	0.057103	0.014207	0.016076	0.0093932	0.0083696	0.060726	0.087075	0.023496	0.0024482	0.013036	0.0040034	0.010299	0.0093973	0.0097151	0.0064444	0.0402	0.046856
P42330	0.018313	0.024191	0.029557	0.021326	0.035388	0.027624	0.0087952	0.0064866	0.028285	0.01087	0.014076	0.020727	0.012381	0.013089	0.0023248	0.0059067	0.013825	0.049156	0.024322	0.018316	0.016634	0.028334	0.0057262	0.041926	0.038497	0.032493	0.006487	0.013559	0.059198	0.00824	0.020361	0.055558	0.039404	0.050175	0.034418	0.017052	0.052218	0.050346	0.039465	0.063734	0.0061678	0.12667	0.062091	0.089841	0.095223	0.059685	0.082608	0.085495	0.32575
P60983	0.01356	0.02255	0.037428	0.012379	0.04843	0.016041	0.006351	0.0049706	0.027841	0.009651	0.016314	0.01162	0.0074316	0.0093615	0.0058763	0.0044446	0.012793	0.031031	0.0091381	0.017563	0.017343	0.055711	0.0065236	0.041108	0.030865	0.011486	0.0091189	0.01142	0.028915	0.0062252	0.027434	0.020873	0.030926	0.080896	0.05149	0.017499	0.056263	0.061222	0.052707	0.10765	0.020537	0.093911	0.033509	0.087276	0.08475	0.1064	0.10533	0.11047	0.26632
Q9BRG1	0.017154	0.012619	0.034017	0.0097761	0.024304	0.026621	0.009008	0.0085713	0.028155	0.016214	0.018295	0.012222	0.01041	0.017077	0.0086137	0.010741	0.026438	0.035384	0.010934	0.010015	0.018661	0.047571	0.0070819	0.031409	0.013803	0.0078084	0.010983	0.0043225	0.038135	0.0079841	0.014805	0.022481	0.023011	0.068164	0.046787	0.016411	0.036331	0.050574	0.048248	0.061003	0.014726	0.058794	0.024282	0.078809	0.056472	0.067241	0.056554	0.055723	0.27008
O75937	0.014385	0.028446	0.036943	0.017108	0.086032	0.012006	0.010439	0.0084727	0.037641	0.022189	0.028725	0.023476	0.024523	0.029474	0.0058827	0.0062904	0.020044	0.03202	0.015129	0.058045	0.067769	0.1141	0.042604	0.064374	0.07463	0.032117	0.0037587	0.010508	0.052069	0.0049846	0.044876	0.03338	0.092807	0.15269	0.11553	0.066063	0.10182	0.18555	0.14648	0.12624	0.020937	0.062342	0.032691	0.043389	0.040908	0.066886	0.035986	0.045011	0.1196
Q13428	0.070551	0.049319	0.10117	0.035846	0.061235	0.037663	0.017961	0.015749	0.056144	0.037868	0.047752	0.028951	0.029612	0.042919	0.015959	0.015851	0.03393	0.077196	0.050267	0.043143	0.080862	0.10765	0.054266	0.10276	0.078023	0.039768	0.012315	0.0060344	0.074981	0.04084	0.03857	0.081563	0.083093	0.21727	0.14667	0.073552	0.13059	0.27132	0.1596	0.16813	0.037947	0.13208	0.079527	0.13404	0.10964	0.19667	0.10762	0.14608	0.37094
P36405	0.0083289	0.026157	0.045286	0.012747	0.065864	0.036164	0.0089471	0.0070232	0.024327	0.016089	0.015972	0.021167	0.020599	0.020049	0.0078571	0.003776	0.0085494	0.0084325	0.009491	0.014972	0.026153	0.06114	0.0166	0.040182	0.025721	0.022476	0.0043309	0.0042975	0.042211	0.0033297	0.020009	0.012084	0.027404	0.088395	0.029331	0.029331	0.033593	0.05259	0.067711	0.069872	0.0062609	0.083043	0.049101	0.073029	0.069433	0.069059	0.034079	0.082248	0.18201
P49902	0.060286	0.050824	0.13979	0.030844	0.12733	0.05478	0.021372	0.020269	0.059654	0.038753	0.040321	0.049073	0.020272	0.033352	0.052192	0.010405	0.014452	0.034435	0.053598	0.035684	0.092897	0.18195	0.073679	0.12423	0.064486	0.03451	0.011408	0.018287	0.042503	0.046361	0.031955	0.060958	0.077751	0.17866	0.083315	0.048453	0.059404	0.17781	0.18888	0.19843	0.021208	0.16187	0.075396	0.11689	0.10318	0.25511	0.083462	0.27549	0.20004
Q7L5N1	0.037054	0.039618	0.12906	0.018309	0.087724	0.051623	0.01475	0.012752	0.045838	0.033441	0.037452	0.030153	0.025405	0.035469	0.028743	0.0095385	0.013367	0.014946	0.024048	0.018916	0.079861	0.10868	0.070315	0.083625	0.030203	0.022643	0.011613	0.0023352	0.04129	0.044765	0.040579	0.029641	0.031507	0.15933	0.079662	0.044973	0.045673	0.15794	0.12887	0.12688	0.017019	0.097091	0.06843	0.121	0.10108	0.23284	0.065426	0.16831	0.2164
Q8WW12	0.034684	0.038376	0.12465	0.023862	0.1077	0.054211	0.017006	0.014175	0.056573	0.033369	0.038558	0.034154	0.019298	0.030579	0.025803	0.010046	0.012794	0.016667	0.026438	0.025708	0.091143	0.10476	0.067968	0.09678	0.037546	0.031841	0.01479	0.0069664	0.045041	0.041631	0.053832	0.032828	0.03904	0.14313	0.073896	0.031618	0.039742	0.14013	0.10995	0.1119	0.011146	0.10317	0.06948	0.10698	0.091006	0.22347	0.064037	0.16654	0.1676
P15927	0.029469	0.03171	0.077583	0.015661	0.12726	0.035878	0.019122	0.015162	0.061481	0.034407	0.038452	0.039089	0.029884	0.037179	0.015563	0.011735	0.019312	0.042407	0.039628	0.032203	0.10895	0.11864	0.092628	0.083867	0.055243	0.027808	0.0029118	0.0035787	0.028452	0.031024	0.050824	0.050859	0.057317	0.11884	0.083851	0.042729	0.050042	0.19592	0.20334	0.12837	0.006733	0.069677	0.049324	0.079436	0.0793	0.12474	0.04789	0.098326	0.10551
Q9Y6E2	0.0086525	0.0071533	0.036455	0.0048918	0.047239	0.048876	0.0078622	0.0068717	0.022732	0.015455	0.011891	0.010943	0.0096723	0.013499	0.0088715	0.0052393	0.0083921	0.014553	0.018735	0.0051749	0.040387	0.046496	0.035111	0.02582	0.011361	0.0088745	0.0017674	0.0010075	0.0097213	0.0078889	0.0092088	0.0093757	0.0157	0.047535	0.01864	0.010439	0.0086284	0.062713	0.089939	0.025624	0.00072852	0.023236	0.024111	0.054801	0.041565	0.058967	0.015791	0.10364	0.088115
O00629	0.055459	0.11233	0.18052	0.071288	0.23342	0.070409	0.03163	0.027362	0.10688	0.070284	0.10763	0.10018	0.083174	0.09114	0.036213	0.014176	0.031908	0.032256	0.032876	0.10283	0.14405	0.24808	0.10388	0.20364	0.12606	0.078659	0.034922	0.01434	0.18161	0.070102	0.10232	0.082661	0.11797	0.30117	0.3058	0.17386	0.26497	0.31267	0.19425	0.24102	0.060566	0.18168	0.11159	0.10059	0.12145	0.29344	0.10478	0.12276	0.19456
Q9P0S9	0.061	0.090822	0.23588	0.044416	0.12784	0.069652	0.022062	0.018652	0.071194	0.053717	0.076579	0.054594	0.050716	0.065158	0.045215	0.014917	0.018951	0.010378	0.020899	0.041672	0.11794	0.14229	0.10169	0.14707	0.046025	0.048819	0.052475	0.0051903	0.11896	0.11214	0.11072	0.046044	0.04033	0.26082	0.18355	0.096826	0.11228	0.22574	0.11065	0.19172	0.060955	0.16854	0.12925	0.17265	0.1573	0.42843	0.12651	0.19412	0.32373
O60925	0.049906	0.086411	0.19339	0.053757	0.14111	0.061814	0.019855	0.013036	0.071593	0.032482	0.049678	0.045467	0.025194	0.030952	0.017033	0.0097918	0.008971	0.015044	0.031377	0.043673	0.10625	0.07281	0.076934	0.14857	0.071427	0.084682	0.031766	0.015367	0.086626	0.079245	0.13088	0.054785	0.042582	0.18416	0.089761	0.037463	0.066809	0.16759	0.074387	0.14995	0.016758	0.21951	0.17664	0.19276	0.19487	0.38213	0.15586	0.26869	0.30704
P48556	0.043744	0.059725	0.17883	0.029682	0.07397	0.086749	0.011807	0.0090656	0.036524	0.021274	0.027766	0.022958	0.015276	0.017703	0.027639	0.005621	0.0056798	0.0098324	0.023878	0.0095706	0.038012	0.060432	0.031555	0.086673	0.0281	0.028732	0.02435	0.0045688	0.043368	0.055133	0.03136	0.022812	0.015239	0.15096	0.041267	0.024764	0.039392	0.089543	0.059651	0.11998	0.017011	0.19884	0.14285	0.23852	0.218	0.39048	0.16368	0.43004	0.46005
Q15046	0.045409	0.065318	0.1682	0.032562	0.070925	0.07482	0.010879	0.0078144	0.034876	0.01801	0.023385	0.019275	0.011955	0.014568	0.022254	0.0046416	0.0044557	0.01114	0.027557	0.011649	0.035741	0.053473	0.026599	0.083429	0.033752	0.036882	0.021452	0.0071584	0.040438	0.039733	0.038711	0.022694	0.019	0.15283	0.031179	0.021149	0.03561	0.088749	0.05648	0.13356	0.017311	0.22978	0.14973	0.24536	0.22435	0.37409	0.17426	0.44886	0.50257
P50583	0.0083809	0.021253	0.057447	0.0034097	0.058782	0.0097928	0.0044864	0.0033099	0.016918	0.011611	0.016263	0.0079693	0.015497	0.01474	0.010315	0.0034415	0.0070963	0.0057456	0.0039394	0.011944	0.041641	0.075001	0.048037	0.033036	0.019429	0.0057799	0.0030731	0.00076285	0.010162	0.011504	0.037442	0.0065146	0.016181	0.12752	0.059932	0.037698	0.035389	0.12679	0.11748	0.12523	0.024327	0.040456	0.032208	0.091632	0.078686	0.15418	0.05925	0.12024	0.16993
P37198	0.014822	0.040712	0.096391	0.013237	0.063935	0.015875	0.0037599	0.0023986	0.019675	0.0078137	0.016046	0.011309	0.0078244	0.0082475	0.0093825	0.0018229	0.0023619	0.0036018	0.0052206	0.01593	0.03145	0.049639	0.025645	0.056078	0.025769	0.019048	0.017245	0.0081191	0.028094	0.028624	0.062653	0.013832	0.01621	0.11616	0.056057	0.023646	0.04335	0.088143	0.042103	0.12975	0.028636	0.125	0.078539	0.13286	0.13419	0.29931	0.13733	0.25232	0.30087
Q3ZCQ8	0.011589	0.030338	0.084833	0.0085369	0.043111	0.017711	0.0025641	0.0015483	0.011349	0.0058345	0.0090513	0.0059499	0.005986	0.0058142	0.0069205	0.001078	0.0012188	0.0020053	0.005409	0.0077282	0.024495	0.034011	0.024698	0.03903	0.019059	0.015531	0.0070194	0.0027853	0.015722	0.015533	0.032088	0.0068648	0.010464	0.11302	0.026374	0.017387	0.022651	0.077926	0.044126	0.094874	0.013823	0.10334	0.080286	0.14243	0.12761	0.25534	0.097896	0.29264	0.31958
O43684	0.015493	0.036973	0.069773	0.015567	0.1028	0.027819	0.0064398	0.0048362	0.031142	0.015729	0.024078	0.023572	0.020149	0.021901	0.0094328	0.0023248	0.0044453	0.010851	0.018012	0.02949	0.062384	0.089888	0.053665	0.058085	0.037809	0.030365	0.007562	0.0054823	0.036198	0.023281	0.059405	0.025342	0.041832	0.097273	0.083849	0.050509	0.062803	0.1524	0.10393	0.10558	0.015255	0.075854	0.048962	0.057828	0.072674	0.15562	0.052426	0.12967	0.13544
Q92890	0.016512	0.02856	0.075993	0.012423	0.062239	0.035217	0.004667	0.0037342	0.021454	0.012022	0.016941	0.015124	0.012251	0.014682	0.011155	0.0019519	0.0031497	0.0071349	0.014858	0.01295	0.038559	0.063112	0.033666	0.045455	0.020092	0.019201	0.0095175	0.0033098	0.028731	0.025171	0.03175	0.017336	0.021977	0.084879	0.053431	0.031372	0.039091	0.10361	0.068279	0.079443	0.012757	0.078585	0.051925	0.078132	0.082388	0.18383	0.059227	0.1859	0.20346
Q9C0C2	0.031968	0.046161	0.075125	0.014988	0.095327	0.017745	0.0069144	0.00523	0.028131	0.013082	0.017042	0.018595	0.012126	0.01536	0.016036	0.002416	0.0035777	0.025712	0.042446	0.03295	0.062254	0.10923	0.058274	0.058835	0.056243	0.031844	0.0035557	0.013414	0.015383	0.019941	0.057083	0.037993	0.066209	0.11399	0.051805	0.043334	0.047728	0.18656	0.16789	0.20373	0.025119	0.1263	0.055361	0.089508	0.10149	0.18804	0.087494	0.2619	0.21267
Q13057	0.01037	0.0391	0.067174	0.014382	0.10341	0.035527	0.004441	0.0030515	0.027131	0.0091609	0.019907	0.014314	0.012939	0.011134	0.0082574	0.0013191	0.0028161	0.0096377	0.011368	0.018678	0.031265	0.066633	0.025006	0.043412	0.028108	0.019328	0.014275	0.0069145	0.02336	0.020273	0.060729	0.011957	0.022131	0.07242	0.065907	0.032652	0.06257	0.095743	0.063278	0.096399	0.020884	0.081361	0.048973	0.079434	0.11281	0.20149	0.1066	0.22068	0.18891
Q9UHD1	0.0081927	0.023759	0.045336	0.012647	0.10254	0.026475	0.005847	0.0037426	0.031102	0.0097746	0.016156	0.015171	0.0094908	0.0099941	0.0040713	0.0020966	0.0035082	0.013857	0.015983	0.023365	0.049609	0.051839	0.035963	0.04455	0.035707	0.027766	0.0056328	0.0096956	0.018642	0.012608	0.061614	0.016872	0.031482	0.056448	0.044373	0.017689	0.03328	0.094712	0.070833	0.063729	0.0044844	0.05804	0.042147	0.05553	0.071658	0.11583	0.055879	0.14031	0.098903
Q9UKM9	0.011324	0.026628	0.10372	0.013861	0.029183	0.063832	0.0031739	0.0021604	0.016012	0.0083382	0.017705	0.0075993	0.010858	0.0097854	0.0061898	0.0028436	0.0029683	0.0016482	0.0035631	0.0035761	0.018684	0.01336	0.017163	0.032784	0.0051227	0.014509	0.052827	0.0011565	0.046183	0.066728	0.043925	0.0073699	0.0020923	0.059717	0.052554	0.016156	0.032194	0.047287	0.0090352	0.025353	0.015486	0.068198	0.094119	0.15548	0.15311	0.31229	0.12726	0.24649	0.39606
P10155	0.03642	0.026319	0.091958	0.012256	0.04925	0.039047	0.0075519	0.007286	0.02886	0.020978	0.026454	0.011726	0.013905	0.022005	0.023555	0.0063467	0.011508	0.024133	0.026182	0.014314	0.055872	0.093953	0.052417	0.050548	0.02294	0.011793	0.012285	0.0021133	0.021592	0.038518	0.026992	0.022165	0.030468	0.13436	0.087314	0.043213	0.052801	0.18376	0.1254	0.10858	0.031453	0.061188	0.040615	0.10272	0.082986	0.2252	0.076137	0.21949	0.26051
P17858	0.019417	0.019347	0.076819	0.0074564	0.044847	0.025102	0.0057247	0.0042169	0.025397	0.012376	0.017647	0.0071487	0.0074944	0.011109	0.0098991	0.0053761	0.0071918	0.01345	0.012406	0.0086239	0.045496	0.043535	0.039515	0.039655	0.01546	0.0097768	0.0090811	0.0015829	0.012223	0.029628	0.043033	0.012906	0.012919	0.092379	0.045747	0.014781	0.022065	0.11162	0.070272	0.079033	0.012647	0.053815	0.044542	0.12034	0.097516	0.20915	0.085773	0.18785	0.23412
O60869	0.015195	0.01439	0.086607	0.0079325	0.019477	0.046158	0.0032231	0.0024944	0.010381	0.0059886	0.0070903	0.0056946	0.0029523	0.0036969	0.01037	0.0023524	0.0020303	0.0033437	0.0075574	0.0012805	0.012318	0.016836	0.011292	0.032639	0.0065097	0.0075044	0.012402	0.0020399	0.014888	0.031521	0.0064958	0.0087961	0.0031594	0.061733	0.013018	0.0046334	0.0089	0.030155	0.0193	0.035615	0.0039111	0.091495	0.083498	0.17666	0.13574	0.25686	0.10059	0.37561	0.3861
Q7Z4V5	0.010459	0.019565	0.070149	0.0073445	0.03259	0.050881	0.003325	0.0021093	0.010966	0.0052637	0.0060497	0.0045292	0.0044204	0.0035964	0.0062661	0.0013489	0.001435	0.0047119	0.010423	0.001596	0.011338	0.017723	0.011281	0.025722	0.010899	0.0097812	0.0042791	0.0011095	0.0080291	0.010968	0.0086071	0.0045039	0.0040786	0.063206	0.0070483	0.0057199	0.0092732	0.034953	0.034066	0.044185	0.00247	0.091366	0.082556	0.17801	0.15954	0.19721	0.097136	0.38859	0.36287
Q9NP72	0.014731	0.021349	0.078273	0.0083626	0.037742	0.035223	0.0039646	0.0029122	0.015522	0.0061536	0.0087615	0.0069747	0.0033442	0.0040055	0.011994	0.0021132	0.0024723	0.0066039	0.0086079	0.0031083	0.012829	0.03126	0.0094059	0.035034	0.011171	0.00752	0.01034	0.0044078	0.011265	0.018434	0.014767	0.0085511	0.0064818	0.066595	0.015236	0.0061089	0.013837	0.034611	0.032266	0.074647	0.0083973	0.11086	0.064447	0.16218	0.14429	0.23807	0.1271	0.34795	0.34959
Q9NZJ9	0.0071261	0.00060401	0.011573	0.00098014	0.0026587	0.0047649	0.0017239	0.0028589	0.003843	0.0085944	0.0062869	0.0062657	0.0064543	0.015417	0.0084568	0.007982	0.011395	0.0063733	0.0063878	0.0074472	0.04526	0.030234	0.059218	0.0086359	0.0015908	0.0035587	0.011543	0.0042213	0.023407	0.048542	0.0080867	0.034499	0.02018	0.017619	0.085285	0.026934	0.011463	0.085597	0.040843	0.0071662	0.012714	0.0020268	0.0056781	0.0098932	0.0034074	0.032981	0.0029385	0.020306	0.062701
O95168	0.0096004	0.00044016	0.0076174	0.00037649	0.0010486	0.0041247	0.0046937	0.0068802	0.004807	0.012678	0.005777	0.0072202	0.010802	0.019376	0.00915	0.021121	0.041232	0.024881	0.0061308	0.0022272	0.019424	0.029189	0.022727	0.0074192	0.0017407	0.00064439	0.0015364	0.00055115	0.01648	0.015502	0.000641	0.038618	0.014199	0.026932	0.04037	0.018721	0.0083404	0.047205	0.068916	0.017366	0.0076763	0.00491	0.0060627	0.032599	0.0093198	0.011782	0.0051195	0.0094609	0.14765
P09622	0.0070491	0.00038828	0.0059811	0.001843	0.0091641	0.0047557	0.0065102	0.0085451	0.013782	0.017673	0.0098815	0.016516	0.0086866	0.023137	0.0047613	0.016241	0.031305	0.027987	0.013038	0.016899	0.072043	0.048768	0.056718	0.019543	0.0089135	0.007126	0.0016179	0.0062958	0.030465	0.01387	0.0050071	0.061192	0.054228	0.02375	0.071977	0.018249	0.011554	0.088555	0.084105	0.0088561	0.0011794	0.002627	0.0039266	0.005171	0.0012534	0.0058674	0.00055181	0.0025434	0.018423
P14854	0.010949	0.00073362	0.011014	0.0012067	0.021007	0.0089716	0.01615	0.018285	0.032442	0.02813	0.017221	0.012881	0.0092529	0.023496	0.012471	0.037327	0.070474	0.070859	0.015428	0.010729	0.071949	0.072226	0.052694	0.022824	0.010574	0.0017435	0.00099348	0.0026683	0.0075572	0.0086787	0.0073187	0.03284	0.036981	0.042285	0.049889	0.0092529	0.0076301	0.084389	0.15623	0.028934	0.0019898	0.0034709	0.0032314	0.025121	0.0076247	0.012112	0.005367	0.0084559	0.031179
O95319	0.014811	0.0042773	0.021613	0.0015283	0.026843	0.0052587	0.010622	0.011509	0.021337	0.026203	0.019267	0.025295	0.028352	0.039606	0.01255	0.019054	0.038523	0.035382	0.014305	0.014375	0.075364	0.095975	0.08372	0.031442	0.015731	0.0038425	0.0004931	0.00061726	0.019304	0.023889	0.0097224	0.060527	0.041513	0.067224	0.092093	0.047357	0.027799	0.1511	0.20363	0.073634	0.0077611	0.01235	0.010986	0.031262	0.017446	0.028261	0.0081863	0.010845	0.063389
Q9NP81	0.021986	0.0041575	0.025183	0.0020078	0.0025521	0.0046723	0.0049798	0.0045228	0.0073405	0.0096951	0.0047278	0.0062817	0.0066103	0.014529	0.0055761	0.015564	0.012484	0.014662	0.018117	0.005193	0.040929	0.011273	0.044046	0.012611	0.0037881	0.011742	0.0033745	0.0027167	0.016425	0.028686	0.024434	0.048534	0.015185	0.030901	0.014018	0.0090691	0.002069	0.06339	0.044668	0.033873	0.0063575	0.030809	0.033202	0.080854	0.035454	0.046186	0.01838	0.04155	0.27101
P30504	0.080203	0.0181	0.05059	0.040063	0.014378	0.019557	0.0063841	0.00745	0.017098	0.014015	0.012205	0.016774	0.0038021	0.012812	0.012461	0.0063597	0.0086706	0.071493	0.10531	0.051017	0.068318	0.060563	0.048283	0.071925	0.075715	0.075445	0.015805	0.081617	0.066915	0.049889	0.011365	0.16069	0.15859	0.099015	0.084905	0.037615	0.064415	0.22392	0.084937	0.065979	0.021123	0.11989	0.070973	0.056715	0.035683	0.14156	0.050656	0.28672	0.31221
Q14566	0.039195	0.012267	0.035576	0.02705	0.015341	0.01245	0.0019807	0.0025256	0.0072811	0.0052144	0.0059969	0.016724	0.0020545	0.005227	0.0079303	0.0011498	0.001656	0.029606	0.060524	0.036744	0.039349	0.052202	0.032972	0.058011	0.058737	0.054408	0.012523	0.091777	0.056911	0.055559	0.0045027	0.14199	0.12008	0.053378	0.084213	0.033719	0.067282	0.15388	0.052238	0.044341	0.013341	0.10207	0.061341	0.030625	0.02785	0.14247	0.042764	0.32865	0.21169
Q9BUH6	0.0063624	0.00057655	0.0041999	0.00090111	0.00010753	0.0031897	0.00023679	0.00027062	0.00068048	0.00030401	0.00036525	8.7699e-05	7.001e-05	0.00017213	0.00074349	0.0018169	0.0032584	0.027312	0.007108	0.00063742	0.0011363	0.0015443	0.00090341	0.0018409	0.0020838	0.0011011	0.0064625	0.011275	0.0022881	0.0082029	0.00095469	0.014397	0.005169	0.0069876	0.0071828	0.00095704	0.0050886	0.016208	0.0061985	0.0079531	0.0094695	0.017574	0.014693	0.074081	0.04274	0.051513	0.079387	0.22966	0.44782
P48960	0.008454	0.0004946	0.0010189	0.0029737	0.0023084	0.0022702	0.00064153	0.0014397	0.0026299	0.0023706	0.0025438	0.0018473	0.0010437	0.0040356	0.0032752	0.0027296	0.0086172	0.070576	0.035624	0.03158	0.02483	0.037087	0.022433	0.0037568	0.012574	0.0089446	0.012964	0.084857	0.011497	0.012913	0.0074781	0.05937	0.11069	0.0062898	0.096897	0.02873	0.04071	0.12349	0.053933	0.0086402	0.036003	0.0021389	0.0012822	0.0018713	0.0012796	0.011116	0.0083202	0.064949	0.065383
P62854	0.036819	0.0047581	0.014245	0.0086306	0.00089723	0.0027321	0.0013646	0.0018832	0.0042337	0.0034566	0.0050943	0.0026969	0.0017161	0.0051536	0.0042733	0.0075062	0.01156	0.062936	0.032219	0.021781	0.022466	0.015333	0.019823	0.013751	0.015413	0.016296	0.034848	0.056189	0.031874	0.067406	0.019157	0.11038	0.058061	0.026653	0.098323	0.02467	0.049556	0.1316	0.025658	0.03322	0.072602	0.033888	0.025492	0.048015	0.029604	0.097877	0.083051	0.16228	0.41529
Q96A33	0.0066429	0.0056819	0.0087408	0.0045705	0.0081652	0.003995	0.00035226	0.00020204	0.002866	0.00026237	0.00068948	0.00016985	4.2449e-05	9.2891e-05	0.0006653	0.0003567	0.00039756	0.027571	0.02079	0.0095033	0.0073821	0.0057815	0.0053094	0.0057195	0.018806	0.013847	0.0070405	0.061555	0.0010079	0.0039976	0.027912	0.01027	0.024673	0.013157	0.0069381	0.001537	0.0083623	0.046827	0.017627	0.029551	0.012182	0.041463	0.024794	0.064398	0.063528	0.097093	0.12103	0.44243	0.2917
O14744	0.035214	0.022165	0.017253	0.015787	0.02685	0.00099799	0.0048087	0.0038559	0.02179	0.0085868	0.016785	0.011039	0.010102	0.014521	0.0018808	0.0079481	0.020411	0.12584	0.043386	0.090317	0.06628	0.059174	0.048242	0.043396	0.10049	0.040846	0.0066091	0.04925	0.036062	0.0268	0.08255	0.14311	0.15596	0.084063	0.17258	0.06462	0.14166	0.30665	0.1305	0.15658	0.070465	0.064574	0.031948	0.045804	0.04782	0.077958	0.10358	0.078425	0.24757
Q8N684	0.056686	0.025723	0.019991	0.019271	0.022239	0.0016067	0.0056993	0.004829	0.022416	0.0082856	0.012391	0.0061398	0.0044637	0.011166	0.0047472	0.0096105	0.016365	0.15508	0.087283	0.099471	0.075138	0.057862	0.052217	0.033206	0.091592	0.057052	0.011624	0.10641	0.019372	0.020364	0.13052	0.12466	0.1897	0.074829	0.096935	0.042656	0.075764	0.29882	0.13603	0.1787	0.096376	0.080998	0.029657	0.057093	0.04988	0.088838	0.11798	0.15643	0.31539
Q96CN7	0.14194	0.036313	0.11362	0.060264	0.06094	0.036593	0.028462	0.028643	0.084785	0.049828	0.06216	0.041206	0.01529	0.040317	0.030278	0.038187	0.052505	0.18283	0.13217	0.090697	0.17895	0.12481	0.12555	0.15635	0.12105	0.071175	0.038044	0.062126	0.080638	0.15302	0.065408	0.22966	0.17493	0.17747	0.23308	0.055547	0.12702	0.39327	0.17829	0.14188	0.044163	0.11791	0.081748	0.11058	0.077759	0.26613	0.12953	0.23646	0.26855
Q9NUP9	0.075936	0.0087463	0.061341	0.011118	0.0068214	0.015467	0.0049696	0.0060344	0.011158	0.010979	0.0091695	0.0059088	0.0021981	0.0081811	0.024278	0.011521	0.0092403	0.055832	0.077795	0.015117	0.06666	0.040459	0.080389	0.037356	0.022962	0.019323	0.017479	0.030403	0.012435	0.1115	0.013977	0.095796	0.055251	0.067091	0.058802	0.018533	0.018985	0.20018	0.091737	0.059117	0.029199	0.053585	0.05089	0.10333	0.05565	0.22438	0.07868	0.41301	0.34022
O15355	0.0229	0.030242	0.067237	0.03316	0.06598	0.054647	0.0052852	0.0038852	0.036493	0.0086407	0.019603	0.0069863	0.0029083	0.0062197	0.0073163	0.0032619	0.0035669	0.026122	0.033576	0.031729	0.048177	0.032722	0.02588	0.042621	0.029203	0.047777	0.066512	0.0513	0.027463	0.038271	0.12646	0.019325	0.035897	0.046641	0.059881	0.011194	0.039817	0.10151	0.025266	0.042247	0.023282	0.073662	0.052053	0.077977	0.090249	0.24306	0.13735	0.33659	0.22748
P55957	0.081913	0.061527	0.13552	0.041076	0.1148	0.034195	0.014736	0.011884	0.061022	0.022494	0.03356	0.019938	0.006426	0.015111	0.032316	0.0085771	0.0089143	0.066491	0.085231	0.060115	0.11137	0.12323	0.081718	0.11068	0.092331	0.056641	0.024791	0.058248	0.021481	0.059293	0.11315	0.065198	0.10207	0.16319	0.084511	0.029738	0.05986	0.2593	0.15612	0.22744	0.045863	0.1755	0.082453	0.14565	0.13688	0.37035	0.18828	0.47797	0.28532
Q9UHY7	0.05641	0.050786	0.14104	0.022139	0.096491	0.023328	0.013175	0.011265	0.047751	0.03622	0.056935	0.032086	0.039217	0.048703	0.026697	0.014172	0.017666	0.028871	0.036941	0.057534	0.17651	0.12963	0.21437	0.10347	0.061678	0.038725	0.024458	0.0066595	0.04804	0.16269	0.12302	0.079246	0.066761	0.19079	0.2558	0.11535	0.12042	0.41939	0.19909	0.16883	0.067522	0.064963	0.080197	0.10701	0.10296	0.35058	0.10429	0.20022	0.19306
Q9Y295	0.036326	0.042828	0.084812	0.035219	0.15807	0.020652	0.0095702	0.0089496	0.048988	0.022049	0.045774	0.033809	0.016582	0.024251	0.025013	0.0061564	0.0082827	0.040054	0.052502	0.12465	0.18058	0.16882	0.1882	0.10349	0.1052	0.065714	0.04614	0.095465	0.041745	0.12709	0.15904	0.088709	0.15058	0.10951	0.28996	0.096923	0.15164	0.38441	0.16926	0.12991	0.071913	0.053581	0.048801	0.036159	0.053253	0.29547	0.097186	0.29244	0.06817
P53384	0.0040963	0.0066401	0.02369	0.0076091	0.048571	0.11406	0.0086316	0.0085844	0.034759	0.015294	0.018691	0.0076703	0.0094735	0.015774	0.011764	0.0090439	0.013778	0.015722	0.01355	0.0065464	0.026075	0.029199	0.014035	0.0083406	0.0015177	0.0088284	0.053081	0.0078451	0.016823	0.01154	0.065307	0.002554	0.0077091	0.008064	0.026479	0.0069475	0.0083226	0.020225	0.020323	0.0053959	0.0067022	0.0075557	0.0079087	0.029723	0.031952	0.045136	0.024782	0.065617	0.078042
Q96FJ2	0.064299	0.13665	0.28965	0.080435	0.30225	0.26561	0.097335	0.079193	0.22248	0.19341	0.244	0.12094	0.26175	0.25276	0.055372	0.089244	0.12515	0.039421	0.042024	0.083657	0.30838	0.18464	0.29887	0.18617	0.070257	0.096674	0.095148	0.00055912	0.21402	0.16578	0.30487	0.042398	0.047437	0.32463	0.35718	0.21788	0.1995	0.38761	0.23286	0.11893	0.053445	0.06989	0.15717	0.20337	0.20348	0.31507	0.096276	0.064305	0.19276
Q9HA64	0.028105	0.061648	0.15986	0.075321	0.21888	0.26059	0.087226	0.073148	0.18651	0.13718	0.1389	0.11293	0.11766	0.14302	0.032279	0.068685	0.094502	0.023741	0.02512	0.053454	0.17016	0.10582	0.0944	0.14685	0.041931	0.094637	0.075588	0.0062059	0.22864	0.042131	0.14693	0.028193	0.039503	0.16328	0.12495	0.055708	0.064108	0.095114	0.078762	0.036338	0.0052089	0.075325	0.10818	0.11636	0.096004	0.11724	0.033625	0.026538	0.10778
P46060	0.051545	0.041524	0.12724	0.055593	0.13173	0.065324	0.031315	0.035501	0.11121	0.077642	0.12006	0.0805	0.048442	0.086789	0.050989	0.033502	0.070947	0.045568	0.021231	0.09327	0.14917	0.22906	0.086638	0.16187	0.057209	0.03794	0.11298	0.031581	0.20206	0.12171	0.089316	0.089912	0.10395	0.19106	0.43532	0.11832	0.22565	0.24426	0.10872	0.10722	0.081593	0.064602	0.039923	0.046799	0.040621	0.23405	0.068018	0.053443	0.11082
P35813	0.1009	0.076734	0.25899	0.061876	0.17767	0.18474	0.048949	0.041729	0.13784	0.073938	0.09213	0.051753	0.031176	0.052061	0.071649	0.038238	0.035405	0.061939	0.086377	0.035277	0.15995	0.12726	0.12539	0.15692	0.054457	0.054828	0.070017	0.015824	0.052237	0.15146	0.12787	0.053621	0.043132	0.17974	0.1076	0.032656	0.053381	0.20435	0.1424	0.1351	0.024915	0.14942	0.131	0.24494	0.21652	0.46245	0.19101	0.41565	0.28484
Q92878	0.08885	0.071883	0.20797	0.059133	0.16081	0.12974	0.029734	0.026159	0.10591	0.052819	0.076659	0.033988	0.021783	0.039402	0.056324	0.021109	0.023195	0.061806	0.083774	0.050745	0.15108	0.14143	0.1196	0.13332	0.065754	0.056273	0.07061	0.025634	0.045195	0.12176	0.13393	0.048005	0.06556	0.1811	0.14436	0.046169	0.082113	0.26931	0.14861	0.14217	0.04562	0.12319	0.096344	0.17078	0.1618	0.44795	0.18058	0.44036	0.25837
Q9NX55	0.070666	0.11801	0.23928	0.073901	0.16166	0.14549	0.033084	0.024582	0.1137	0.056123	0.091675	0.029151	0.038483	0.047723	0.035001	0.021745	0.032146	0.041643	0.037563	0.044274	0.094859	0.10601	0.058799	0.1373	0.07067	0.060436	0.080739	0.009192	0.081195	0.05996	0.16017	0.02121	0.038742	0.28377	0.13268	0.056517	0.1235	0.21065	0.10001	0.17852	0.065388	0.19185	0.14941	0.28665	0.26999	0.47159	0.26869	0.36182	0.48734
O95292	0.078761	0.12285	0.27951	0.078062	0.19412	0.18536	0.03867	0.032116	0.10714	0.075862	0.088819	0.040713	0.047246	0.066657	0.066068	0.018646	0.022953	0.022363	0.055804	0.050928	0.14028	0.16841	0.10845	0.15358	0.073953	0.082933	0.059655	0.0099361	0.083461	0.048608	0.12507	0.017841	0.059181	0.34039	0.10658	0.079284	0.089058	0.2471	0.16036	0.18055	0.048999	0.19034	0.15068	0.23197	0.19825	0.44327	0.13958	0.39506	0.35977
Q16576	0.109	0.12627	0.29489	0.091842	0.25009	0.18789	0.058521	0.045326	0.175	0.088772	0.12465	0.069576	0.053731	0.070295	0.054299	0.036007	0.043668	0.075503	0.083839	0.058112	0.17333	0.15703	0.12241	0.21739	0.10761	0.082561	0.058151	0.011822	0.088513	0.12255	0.1555	0.062885	0.062602	0.28462	0.15673	0.059761	0.12059	0.27706	0.17953	0.20624	0.031712	0.22047	0.17993	0.28455	0.27964	0.49408	0.24166	0.37576	0.34235
P09327	0.015019	0.019054	0.10132	0.010356	0.012586	0.060038	0.0053994	0.0053346	0.013066	0.0091261	0.010454	0.0038506	0.002566	0.0056499	0.034381	0.0073374	0.0065691	0.0012508	0.0019663	0.001586	0.0061303	0.020433	0.0028591	0.021319	0.0012167	0.0050713	0.094694	0.011594	0.027517	0.018938	0.02495	0.001564	0.0017109	0.066984	0.01116	0.0037713	0.0055939	0.0073035	0.0045279	0.04225	0.03984	0.10221	0.058184	0.21157	0.12936	0.28285	0.13906	0.31945	0.56067
P26440	0.011146	0.0048442	0.015444	0.0050761	0.02456	0.023756	0.009129	0.0097896	0.027246	0.017128	0.011491	0.0046753	0.0044411	0.017654	0.014067	0.013792	0.019663	0.028763	0.025073	0.020068	0.054824	0.050859	0.028724	0.0095549	0.005064	0.013793	0.016339	0.020308	0.010443	0.0022787	0.076013	0.0072231	0.041553	0.026406	0.018741	0.0084071	0.0035789	0.056571	0.062879	0.026982	0.013759	0.01061	0.0038587	0.021018	0.0096403	0.020889	0.0087332	0.030164	0.077243
Q15738	0.00042815	0.0017995	0.0071752	0.00040388	0.0016659	0.0021468	0.00024666	0.00013126	0.00022929	0.00014344	0.00013515	9.3512e-05	0.00025462	9.1975e-05	0.0010014	0.00097355	0.00029275	0.00041443	0.00074453	0.0011131	0.0029288	0.00059937	0.0079771	0.0010285	0.0014863	0.0043117	0.0099396	0.02726	0.00071667	0.0048276	0.01876	0.001013	0.0013539	0.0059453	0.0010076	0.00077599	0.00031679	0.0052604	0.0031003	0.0062243	0.0077728	0.014087	0.038136	0.099241	0.06853	0.073351	0.066604	0.3313	0.27721
P35613	0.00063142	0.0033013	0.0054652	0.0023825	0.0037321	0.0088811	0.00033437	0.00016346	0.0017759	5.0777e-05	0.00066333	0.00087719	0.0002135	1.4927e-05	0.0001624	0.00073312	0.0013542	0.012017	0.00058165	0.00040137	2.3802e-05	0.00030165	4.6752e-06	0.0032762	0.002806	0.0013134	0.02645	0.034001	0.0058342	0.013029	0.0050102	0.0088507	0.00045924	0.0010769	0.0059156	0.00018921	0.013238	0.00041052	0.00015491	0.0072493	0.0064485	0.055003	0.045357	0.13545	0.17726	0.096343	0.29806	0.33985	0.48581
P47813	0.012156	0.030865	0.088449	0.012179	0.0041262	0.023815	0.0034176	0.0019474	0.009155	0.0059216	0.016223	0.0023104	0.013447	0.0093525	0.003048	0.014641	0.012199	0.001884	0.00055856	0.0042344	0.010254	0.0011778	0.011119	0.015981	0.0024687	0.015583	0.16394	0.0040526	0.068756	0.099595	0.13857	0.0080431	0.00052852	0.059021	0.058728	0.015353	0.031875	0.030092	0.00086785	0.025743	0.094521	0.071727	0.14919	0.32714	0.25948	0.35421	0.30447	0.20611	0.87854
Q9P2B2	0.001773	0.0032956	0.010344	0.0017236	0.0052729	0.024685	0.005348	0.0024655	0.010584	0.0023344	0.0031611	0.0014685	0.0038045	0.0013667	0.00010077	0.013398	0.017534	0.027841	0.002211	0.00018477	0.0016235	0.00014262	0.00078483	0.004711	0.0027717	0.0024477	0.0040908	0.00064035	0.0047478	0.0050426	0.011836	0.0055238	0.00018084	0.0067457	0.0013633	0.00010946	0.0019324	0.0020998	0.0036536	0.0056594	0.00022638	0.030835	0.061087	0.24373	0.20167	0.03808	0.15036	0.10273	0.45258
P51610	0.016073	0.018721	0.019592	0.0028146	0.0053958	0.0010848	0.0088811	0.0079642	0.0039087	0.011374	0.008347	0.024277	0.059218	0.034877	0.010345	0.031375	0.02917	0.018142	0.011644	0.024366	0.036443	0.019643	0.092817	0.012768	0.017698	0.023274	0.010205	0.023104	0.043353	0.076501	0.056107	0.12242	0.033924	0.036153	0.062569	0.096099	0.032286	0.088178	0.080215	0.096857	0.092001	0.049858	0.090555	0.13299	0.10612	0.052381	0.073845	0.063342	0.42155
Q96SB4	0.013363	0.0077192	0.013236	0.0014512	0.0026368	0.0017675	0.0027715	0.0041389	0.0013241	0.0059645	0.0039222	0.011219	0.020774	0.020111	0.027666	0.012956	0.0097049	0.0083941	0.015105	0.018628	0.028906	0.032173	0.080419	0.0039834	0.0034732	0.011893	0.031733	0.056016	0.021566	0.083775	0.045297	0.071635	0.035891	0.011365	0.059214	0.080389	0.016258	0.070301	0.056245	0.052467	0.14435	0.018324	0.025523	0.043023	0.032933	0.054723	0.034461	0.10816	0.26633
P16444	0.0033536	0.011455	0.0082441	0.0015867	0.0024157	0.00036289	0.00077014	0.00073053	0.0011897	0.0013191	0.0029658	0.00030493	0.0049912	0.0040641	0.0055825	0.0059993	0.0078734	0.0057527	0.001174	0.023543	0.0091854	0.011402	0.017056	0.0013473	0.0045843	0.0074173	0.070963	0.069372	0.0087433	0.010411	0.15119	0.0048307	0.017977	0.026434	0.050025	0.038258	0.02629	0.05169	0.014909	0.06378	0.29681	0.015658	0.017332	0.076094	0.057687	0.086494	0.13316	0.14399	0.45202
Q53H96	0.011352	0.043254	0.081538	0.0092021	0.011022	0.0054876	0.0012341	0.00058652	0.0027418	0.0021079	0.0065705	0.0013027	0.0077945	0.0032348	0.0045646	0.0029794	0.0015973	0.0012469	0.0021063	0.013296	0.018206	0.0061458	0.042387	0.018864	0.018973	0.025235	0.060746	0.020574	0.018529	0.070074	0.11547	0.0087989	0.006116	0.10057	0.052492	0.034637	0.041841	0.096488	0.013476	0.082244	0.13167	0.091063	0.1737	0.29167	0.26141	0.44678	0.31687	0.57363	0.73042
N-Acetyl-serine	0.0071695	0.036178	0.023953	0.0025772	0.0023286	0.0025856	0.00023632	8.7587e-05	0.00028981	4.4938e-05	0.00034824	0.0001801	0.0013345	0.00011045	0.0030658	0.00058222	0.00025628	0.0064485	0.0040065	0.0017595	0.00012314	0.0011879	0.00094918	0.0016039	0.005973	0.0061666	0.031747	0.047648	0.0015801	0.018607	0.04881	0.0069161	0.0018718	0.01346	0.0028608	0.0077752	0.014558	0.00969	0.0045789	0.11958	0.16284	0.17207	0.12266	0.37223	0.42434	0.28147	0.57178	0.86457	0.83246
P06731	0.0017463	0.00016221	0.00014609	0.00050738	0.024146	0.00053236	0.0043277	0.0099286	0.0054609	0.010675	0.0040231	0.0097071	0.0050875	0.016618	0.031779	0.0089535	0.02468	0.048601	0.027358	0.089049	0.082343	0.22629	0.096717	0.0032662	0.017853	0.0055241	0.0028306	0.20274	0.0032472	0.00060604	0.013727	0.029131	0.26558	0.0085451	0.084665	0.061982	0.015361	0.11761	0.26293	0.025722	0.043636	7.0269e-05	3.9996e-06	1.0435e-05	9.0477e-07	0.00021456	2.6096e-05	0.00862	0.00027815
P07108	0.01392	0.02494	0.011072	0.019067	0.11637	0.00016513	0.011405	0.015832	0.027994	0.028873	0.043602	0.068197	0.047677	0.063427	0.031208	0.014643	0.043148	0.052753	0.019797	0.37383	0.19546	0.37992	0.20231	0.071533	0.16645	0.063765	0.033124	0.33946	0.10971	0.031355	0.16152	0.17198	0.48136	0.11923	0.56282	0.33315	0.32222	0.42587	0.29699	0.2269	0.29006	0.020339	0.0073448	0.0015408	0.0025857	0.036376	0.01653	0.015598	0.012639
O43172	0.0019726	0.010528	0.00074792	0.012786	0.082795	0.0036723	0.010764	0.015792	0.020579	0.021788	0.036485	0.073351	0.10221	0.074428	0.0097243	0.017412	0.064779	0.085408	0.019547	0.24689	0.083986	0.18993	0.10231	0.015624	0.073875	0.046786	0.049731	0.25136	0.13236	0.027635	0.1095	0.14851	0.30804	0.010194	0.50594	0.33465	0.34425	0.1938	0.15861	0.036477	0.1799	0.0020298	0.0029613	0.00020732	0.0022245	0.0020497	0.0083767	0.0024309	0.0068662
Q08J23	0.0091591	0.030733	0.0077549	0.0089237	0.058989	0.00034162	0.012379	0.012666	0.012248	0.016115	0.01544	0.051433	0.060458	0.040553	0.013905	0.01356	0.03544	0.04794	0.015816	0.14078	0.052679	0.1655	0.069883	0.035227	0.12133	0.041259	0.003194	0.13436	0.05992	0.0056795	0.050305	0.1214	0.23379	0.088869	0.14818	0.19766	0.15363	0.16084	0.23889	0.24348	0.13172	0.066721	0.031691	0.027273	0.033083	0.016506	0.03833	0.03222	0.1203
Q8N766	0.0018156	0.008277	0.0044669	0.0071573	0.011708	0.028649	0.0028271	0.0043994	0.0068457	0.011293	0.021258	0.0083898	0.056688	0.045324	0.0069078	0.010349	0.027535	0.013333	0.0056106	0.043842	0.025366	0.03287	0.038094	0.00174	0.0027329	0.018322	0.16504	0.034092	0.091724	0.038236	0.1187	0.014654	0.035418	0.0061975	0.24983	0.168	0.13172	0.083772	0.019795	0.0039992	0.1978	0.00076533	0.0054782	0.0054972	0.01085	0.018577	0.018939	0.015863	0.11692
Q9UNS2	0.0014086	0.023657	0.0073531	0.012684	0.037326	0.0358	0.0061455	0.0068377	0.017231	0.016898	0.037521	0.021976	0.1074	0.068204	0.0047357	0.01208	0.038192	0.014515	0.0032844	0.058752	0.023139	0.042099	0.025486	0.0047501	0.006687	0.027486	0.14944	0.024398	0.15141	0.026495	0.18735	0.016689	0.034223	0.011103	0.2722	0.20107	0.2024	0.068413	0.02153	0.013342	0.19016	0.0047521	0.011922	0.011079	0.029443	0.018849	0.036686	0.0060074	0.13991
Q9H910	0.01289	0.010478	0.018336	0.0079689	0.0060963	0.016989	0.0062886	0.0068085	0.011172	0.01676	0.022907	0.0026011	0.030955	0.031612	0.0064768	0.027561	0.052301	0.038624	0.010678	0.030672	0.045345	0.022618	0.061163	0.0079223	0.012393	0.01585	0.06856	0.010801	0.040685	0.034687	0.081066	0.016903	0.032219	0.063005	0.16414	0.087446	0.083335	0.17566	0.051814	0.020242	0.14093	0.0049445	0.024444	0.068823	0.04381	0.06935	0.063146	0.069851	0.32929
Q9UMR2	0.05172	0.059561	0.14915	0.016673	0.0074489	0.03636	0.019038	0.015937	0.018491	0.04531	0.055173	0.021532	0.1351	0.096534	0.01995	0.065936	0.071163	0.011065	0.0070937	0.013938	0.061001	0.017294	0.12116	0.040193	0.011621	0.02812	0.091803	0.00026953	0.14979	0.23149	0.10198	0.057514	0.0068013	0.189	0.19337	0.16526	0.10578	0.19139	0.04938	0.081643	0.17813	0.071138	0.2199	0.38807	0.2765	0.31707	0.1951	0.11735	0.91267
Q02252	0.065301	0.0091208	0.018818	0.033242	0.04324	0.038768	0.02621	0.030333	0.072786	0.039062	0.041553	0.020788	0.011844	0.033925	0.01626	0.046343	0.084229	0.33179	0.16539	0.098073	0.14202	0.098827	0.089123	0.048759	0.079692	0.049008	0.031797	0.10613	0.035931	0.047598	0.062763	0.15554	0.21804	0.046013	0.17527	0.039145	0.085504	0.28906	0.1816	0.041	0.0312	0.017722	0.013294	0.025943	0.018698	0.043011	0.045547	0.09404	0.094902
Q9Y508	0.00068908	0.00012995	0.00099467	0.0020012	0.0018699	0.041311	0.0035849	0.0059726	0.0044025	0.0053894	0.002498	0.0067766	0.0039212	0.0075117	0.005096	0.010218	0.017758	0.010858	0.0052483	0.002371	0.0037115	0.0071667	0.0015625	0.0010329	0.0001335	0.003947	0.036837	0.03539	0.033427	0.0036648	0.0024837	0.010139	0.0089664	0.00024284	0.0098054	0.0031193	0.002076	0.00085126	0.0025944	5.2241e-05	0.0018897	0.0016608	0.002384	0.0051691	0.0027276	0.0011134	0.0017495	0.010803	0.059939
Q08623	0.0054284	0.0059613	0.052872	0.0080351	0.031077	0.24598	0.029869	0.031716	0.043261	0.042224	0.02873	0.014285	0.024033	0.035478	0.043952	0.049817	0.047875	0.0058565	0.0069417	0.0015092	0.026575	0.019303	0.019141	0.0096859	0.00015813	0.0064956	0.11151	0.0040974	0.031503	0.021034	0.042325	0.00089768	0.001124	0.013515	0.010146	0.0040496	0.0010332	0.0034886	0.010872	0.0015872	0.0046309	0.0080749	0.023475	0.10138	0.057673	0.05518	0.021745	0.068649	0.14409
Q96AT9	5.3962e-06	0.0029366	0.0044244	0.0055027	0.025079	0.073895	0.0012815	0.0011132	0.0048425	0.0014158	0.003466	0.0021137	0.0035133	0.001497	0.0012637	0.00095956	0.0019658	0.00043478	0.0002252	0.003869	0.0015763	0.0034756	0.00078581	0.00154	0.00081873	0.0087948	0.09679	0.045418	0.022999	0.0014574	0.030503	5.7214e-05	0.0016575	0.0011275	0.011735	0.0031467	0.009493	0.00049221	0.00023974	8.5927e-05	0.0051473	0.0040291	0.013256	0.018282	0.02977	0.024887	0.029819	0.11033	0.075064
Q14232	0.042554	0.011175	0.0201	0.017687	0.0054311	0.016579	0.026229	0.040632	0.0095129	0.055434	0.023004	0.093372	0.1054	0.11976	0.049455	0.061306	0.0857	0.040973	0.052422	0.063787	0.080821	0.10154	0.12833	0.036451	0.032364	0.06	0.024717	0.071646	0.22773	0.079126	0.0050387	0.26925	0.17376	0.062895	0.16309	0.22968	0.082574	0.13653	0.14071	0.038109	0.070218	0.037672	0.058723	0.029651	0.012499	0.013864	0.004191	0.021041	0.20818
Q99961	0.036663	0.0064414	0.011174	0.010468	0.006438	0.015489	0.035681	0.047495	0.025161	0.065378	0.042861	0.073992	0.12808	0.13026	0.019953	0.11024	0.21069	0.1517	0.040006	0.045867	0.072152	0.076823	0.089751	0.031787	0.03101	0.020358	0.015001	0.014094	0.17074	0.078651	0.0070322	0.26798	0.11384	0.053483	0.2489	0.17971	0.13212	0.16151	0.16665	0.03529	0.054288	0.014066	0.030659	0.040628	0.020894	0.0073018	0.013182	0.0029793	0.20343
Q8TAT6	0.12886	0.28397	0.33897	0.16567	0.40147	0.12537	0.095371	0.09524	0.22645	0.25124	0.36384	0.25535	0.42263	0.42546	0.12345	0.073558	0.15619	0.053267	0.052535	0.35331	0.42159	0.57253	0.4108	0.3433	0.22837	0.18973	0.1799	0.018968	0.55529	0.24185	0.39357	0.17014	0.28795	0.64069	0.98609	0.77574	0.77767	0.81592	0.43262	0.43214	0.42433	0.16631	0.15998	0.1058	0.13437	0.42189	0.11791	0.047931	0.22398
Q9UBF2	0.07754	0.27825	0.34797	0.1214	0.55677	0.17187	0.11442	0.089721	0.2444	0.20456	0.31197	0.2053	0.38926	0.2754	0.077805	0.071492	0.13508	0.06726	0.045265	0.20674	0.34466	0.40617	0.3953	0.33653	0.28758	0.13248	0.063554	0.0053614	0.24858	0.17807	0.2989	0.088951	0.14337	0.60452	0.63374	0.48907	0.57499	0.6507	0.49739	0.40427	0.16264	0.17172	0.26044	0.27006	0.34851	0.48565	0.24136	0.17777	0.22581
Q8N335	0.0019737	0.023789	0.014394	0.014089	0.042061	0.027687	0.013488	0.010622	0.038564	0.020119	0.045331	0.011128	0.0577	0.04232	0.0029333	0.032781	0.072583	0.023156	0.0011495	0.049082	0.02766	0.020761	0.016215	0.010121	0.01012	0.022181	0.15153	0.024521	0.097711	0.013566	0.28845	0.0068993	0.017428	0.029654	0.16593	0.061787	0.10669	0.044164	0.012709	0.021597	0.13014	0.0099981	0.021332	0.056382	0.06722	0.038819	0.099746	0.0087491	0.21295
Q99795	0.014212	0.011255	0.018019	0.0034126	0.00065221	0.0016624	0.0053863	0.0049193	0.0047823	0.0045651	0.0046312	0.0012405	0.0041612	0.0060759	0.010277	0.032525	0.035436	0.018602	0.0020245	0.0090328	0.0050304	0.0053775	0.0036172	0.0045314	0.0030437	0.0061866	0.073611	0.056722	0.020764	0.011053	0.082237	0.014402	0.0091677	0.037107	0.015304	0.0081327	0.0078597	0.012591	0.006537	0.074867	0.17183	0.063879	0.040314	0.21778	0.11191	0.084877	0.19465	0.10797	0.79793
Q9BPW8	0.0013701	0.0042562	0.0045625	0.0010441	0.0088638	0.0018957	0.0035892	0.0035133	0.002255	0.0052661	0.0054306	0.0034686	0.02397	0.0097609	0.0038274	0.012167	0.026661	0.017557	0.0021991	0.017353	0.017483	0.024243	0.04664	0.0052045	0.022196	0.0046105	0.0051729	0.016656	0.0088031	0.0075568	0.01195	0.012784	0.026965	0.042938	0.068399	0.062207	0.047948	0.077912	0.085343	0.030093	0.054805	0.0047721	0.025282	0.062654	0.04647	0.027085	0.046128	0.097269	0.1747
Q96EK6	0.0066968	0.020902	0.039737	0.0064454	0.029022	0.051514	0.020627	0.015698	0.020643	0.028117	0.032735	0.008174	0.083449	0.037689	0.0079654	0.047226	0.076112	0.030845	0.0055903	0.010318	0.035865	0.018295	0.07409	0.016083	0.021784	0.010094	0.021751	0.00085465	0.02295	0.029902	0.042296	0.0074245	0.0072474	0.098201	0.07906	0.066924	0.061058	0.099741	0.090002	0.028916	0.042854	0.012397	0.092133	0.25013	0.20048	0.098116	0.12891	0.14814	0.38161
Q9H9J2	0.0067469	0.0079931	0.01283	0.0033248	0.026137	0.0069457	0.0059095	0.0061832	0.010127	0.012725	0.013101	0.0030852	0.017238	0.015001	0.00914	0.010313	0.031583	0.042946	0.010438	0.02891	0.040206	0.080225	0.056563	0.014537	0.041947	0.0060596	0.003511	0.0095081	0.0067906	0.0029626	0.014392	0.0085836	0.060942	0.11669	0.091514	0.068096	0.068777	0.18639	0.18936	0.067352	0.055473	0.0080166	0.014067	0.053214	0.033897	0.046767	0.039065	0.12298	0.14457
2-Hydroxyglutaric	0.0091416	0.0048164	0.0086733	0.00059209	0.015315	0.019296	0.021333	0.022907	0.011433	0.032386	0.012598	0.014307	0.078483	0.052832	0.017944	0.042606	0.087425	0.075578	0.025627	0.0055381	0.032839	0.066649	0.07385	0.0066875	0.01466	0.002128	5.4128e-05	0.00013274	0.005111	0.0034237	0.0018121	0.022434	0.028895	0.058157	0.02549	0.072811	0.018239	0.097466	0.32885	0.055565	0.012059	0.0061702	0.017041	0.090212	0.052536	0.0054353	0.011518	0.03355	0.17077
1-Monostearin	0.034984	0.026518	0.12501	0.0083301	0.047875	0.1391	0.083131	0.078271	0.06694	0.13413	0.084391	0.065793	0.20995	0.17741	0.06385	0.15715	0.17568	0.028932	0.020582	0.0068869	0.1258	0.064735	0.2061	0.048919	0.0090297	0.012782	0.016971	7.2083e-06	0.066274	0.10152	0.036672	0.03291	0.0076656	0.14517	0.075632	0.091732	0.020942	0.112	0.20241	0.04739	0.015679	0.022462	0.10977	0.28329	0.16445	0.091346	0.035638	0.037749	0.28183
N-Acetylneuraminic	0.019322	0.056657	0.20098	0.025661	0.052646	0.23852	0.061501	0.047665	0.05872	0.084698	0.082405	0.062287	0.18068	0.11373	0.036843	0.10802	0.083649	0.0031266	0.005024	0.0050347	0.06707	0.01235	0.11017	0.053337	0.0045751	0.036742	0.13971	0.00037972	0.1562	0.20113	0.1158	0.016937	0.00067239	0.091464	0.064327	0.054228	0.023738	0.031485	0.021353	0.016212	0.020841	0.060463	0.28125	0.43868	0.35131	0.25738	0.13575	0.1216	0.51478
Q9UHQ9	0.060169	0.01934	0.043807	0.0086446	0.00039758	0.032341	0.0077013	0.00477	0.0049062	0.0046257	0.0018703	0.0022217	0.0059179	0.0047452	0.0029272	0.021007	0.010825	0.062949	0.072036	0.00067485	0.005699	0.00026623	0.0087759	0.0079854	0.0077907	0.027855	0.0057992	0.004366	0.010013	0.035978	0.012747	0.062722	0.0043692	0.02423	0.00037662	0.0023249	0.0013918	0.024802	0.018248	0.038818	0.0069264	0.1776	0.21034	0.49103	0.34708	0.11848	0.22772	0.45517	0.79958
Q9H583	0.053799	0.029144	0.11875	0.01225	0.030452	0.038086	0.026827	0.034573	0.022011	0.068465	0.057764	0.07826	0.12834	0.12097	0.10058	0.060016	0.061915	0.015018	0.025918	0.031339	0.1365	0.13409	0.2793	0.064097	0.018494	0.021744	0.056722	0.00867	0.11194	0.31742	0.032938	0.13454	0.045513	0.12492	0.27689	0.23222	0.094827	0.24021	0.18352	0.087467	0.12431	0.034349	0.095259	0.11709	0.080661	0.21488	0.046848	0.12655	0.24553
Quinolinic acid	5.6769e-05	0.012932	0.0039857	0.006427	0.033492	0.075895	0.0056969	0.0046655	0.006288	0.0056553	0.0056907	0.0050391	0.033144	0.01174	0.0027831	0.0041886	0.010316	0.0031498	0.0017864	0.0095304	0.0026156	0.010336	0.0030308	0.0011892	0.0045309	0.019084	0.036147	0.025564	0.027663	6.962e-05	0.03889	0.00015804	0.0078591	0.0071641	0.0078678	0.027368	0.019074	0.0028961	0.0098033	0.0032956	0.018886	0.010589	0.024981	0.043308	0.061397	0.0069906	0.028165	0.07493	0.17155
Q969Z0	0.0010318	6.9043e-05	0.0014477	0.00016264	0.0092179	0.021482	0.0093159	0.015791	0.0065095	0.015841	0.0071069	0.0063501	0.015341	0.01792	0.029158	0.033518	0.059185	0.034112	0.0087502	0.0051407	0.02868	0.054488	0.055864	0.0013785	0.0011946	0.00032861	0.0093109	0.015331	0.0022603	0.0093352	0.002439	0.0074325	0.019855	0.0038686	0.039563	0.020648	0.0046018	0.026499	0.1065	0.002011	0.011313	1.0159e-05	0.00061606	0.0082552	0.0030799	0.0025955	0.0018934	0.028788	0.01351
GABA	0.0082618	0.011142	0.014866	0.020857	0.035362	0.10739	0.0095181	0.0080061	0.014296	0.0027629	0.0018055	0.0061231	0.00051994	0.00045685	0.010936	0.0041577	0.0031707	0.055414	0.061688	0.0055088	0.0027654	0.0098253	0.00097919	0.011358	0.021875	0.030278	0.020706	0.20668	0.0039936	0.0018238	0.0069399	0.011708	0.023908	0.004136	0.00018219	0.00023023	0.0020088	0.0016147	0.01298	0.012629	0.0011887	0.11549	0.063941	0.1313	0.14083	0.055891	0.13957	0.70353	0.30254
Creatinine	0.0086732	0.013827	0.0040961	0.0056804	0.009207	0.044397	0.0038177	0.003676	0.0025597	0.0012174	0.00040572	0.0013172	0.0022117	0.00098767	0.010432	0.0022703	0.0030654	0.076926	0.077503	0.0038319	0.00053612	0.01204	0.00079004	0.00088745	0.013134	0.014376	0.004719	0.10084	0.00069452	0.00011915	0.0048678	0.0076028	0.030305	0.0039954	7.1469e-05	0.0049144	0.0037015	0.0055915	0.046285	0.041625	0.021871	0.087662	0.033332	0.1284	0.14475	0.019333	0.12727	0.62474	0.56683
P43897	0.063746	0.088829	0.083583	0.02639	0.18038	0.0068577	0.0629	0.073326	0.089397	0.12251	0.15574	0.21822	0.2758	0.23585	0.11044	0.086938	0.20125	0.11658	0.025817	0.21017	0.19163	0.52367	0.24456	0.16764	0.16075	0.028859	0.028656	0.04066	0.21142	0.15266	0.096806	0.29882	0.26742	0.29873	0.72213	0.55576	0.52064	0.46827	0.53471	0.52161	0.37526	0.090506	0.050661	0.067103	0.077949	0.12521	0.098392	0.017658	0.14389
Q9NYK5	0.012337	0.039294	0.061699	0.061222	0.19133	0.098738	0.02837	0.040205	0.055263	0.11522	0.10827	0.10693	0.16619	0.21123	0.067701	0.018103	0.041483	0.0045723	0.028258	0.25619	0.32313	0.38267	0.35697	0.089217	0.074111	0.15317	0.10981	0.071716	0.31511	0.03908	0.12442	0.035177	0.28963	0.19072	0.52647	0.47495	0.25909	0.41721	0.22839	0.027294	0.10299	0.0064702	0.022296	0.0013219	0.0014431	0.049454	0.00027563	0.015254	0.0052773
O75915	0.057533	0.025464	0.016879	0.047162	0.28527	0.045857	0.12026	0.13956	0.22286	0.21835	0.19057	0.18321	0.23458	0.33946	0.054116	0.15848	0.2982	0.42043	0.25566	0.46701	0.65236	0.49513	0.61581	0.10214	0.20602	0.15168	0.022317	0.11465	0.13776	0.062906	0.31663	0.30543	0.65563	0.097012	0.62549	0.39707	0.25997	0.77561	0.77569	0.096061	0.072546	0.0019983	0.0044663	0.0011538	0.001639	0.0033815	0.0011587	0.00035606	0.00056878
Xylulose	0.016152	0.054087	0.011957	0.086253	0.17294	0.01218	0.016254	0.024056	0.052266	0.026316	0.062992	0.09722	0.04177	0.049828	0.042981	0.011816	0.045804	0.10629	0.03675	0.4273	0.077758	0.35109	0.041759	0.074902	0.17668	0.11629	0.23876	0.81384	0.24995	0.034934	0.19218	0.17465	0.50893	0.049996	0.59371	0.29514	0.54035	0.19257	0.10076	0.14575	0.42587	0.063362	0.012236	0.0019821	0.010212	0.054088	0.082949	0.071504	0.046126
3-Aminopropionitri	0.0055966	0.0025602	0.00011282	0.023955	0.05065	0.03056	0.012913	0.022243	0.029272	0.013972	0.016404	0.030354	0.012868	0.020653	0.013155	0.016965	0.059336	0.29676	0.11072	0.16583	0.038111	0.12973	0.018786	0.0072846	0.05708	0.044942	0.067526	0.56487	0.048626	0.0053844	0.036542	0.11805	0.35997	0.00086371	0.17486	0.069428	0.13742	0.071921	0.0941	0.0070766	0.06212	0.0024488	0.00049628	0.00011867	0.00090361	0.00039522	0.0098375	0.033034	0.0093776
Serine	0.0053422	0.013342	0.009405	0.022066	0.003717	0.0085825	0.0031022	0.0024583	0.0019297	0.0018289	0.0017677	0.0023885	0.003066	0.0019036	0.0019458	0.0069446	0.0050046	0.011114	0.012687	0.040432	0.011165	0.0023852	0.01369	0.0084007	0.036165	0.091062	0.072261	0.30527	0.042363	0.008426	0.052231	0.02473	0.051616	0.021791	0.01408	0.014259	0.019137	0.023382	0.0042601	0.0098371	0.047875	0.061767	0.11549	0.1024	0.075924	0.063241	0.1062	0.3739	0.45716
P49406	0.017623	0.078768	0.066122	0.04282	0.14094	0.19096	0.070274	0.070314	0.13417	0.1187	0.16141	0.085432	0.25661	0.23563	0.054682	0.10928	0.1772	0.046975	0.018127	0.086311	0.10221	0.11445	0.082654	0.028228	0.0094488	0.054002	0.31504	0.02033	0.2359	0.07569	0.4803	0.024464	0.038392	0.045813	0.29068	0.21361	0.15983	0.090822	0.065316	0.049497	0.237	0.020239	0.032265	0.068866	0.095868	0.059709	0.076964	0.0062283	0.19767
Inositol	0.026584	0.020546	0.012793	0.073164	0.14768	0.042899	0.016675	0.027332	0.0376	0.02246	0.029139	0.11672	0.017035	0.024028	0.054318	0.0066417	0.019048	0.14497	0.13511	0.22143	0.074624	0.30924	0.054843	0.089532	0.17869	0.10198	0.065323	0.69771	0.1242	0.051134	0.013605	0.26802	0.47867	0.022976	0.28538	0.13798	0.26728	0.14912	0.15748	0.058986	0.062256	0.06646	0.020263	0.0020831	0.0084091	0.043711	0.032491	0.25734	0.020071
Q9NUU7	0.12286	0.057013	0.07775	0.079193	0.075598	0.33921	0.10066	0.089335	0.10469	0.035634	0.021269	0.041991	0.009162	0.01102	0.086648	0.095583	0.063434	0.40582	0.35764	0.014049	0.018749	0.025036	0.0090886	0.044407	0.054272	0.078736	0.075963	0.32969	0.010791	0.044119	0.045221	0.11144	0.053817	0.010953	0.00044594	0.00077035	0.0034692	0.0071313	0.065168	0.073998	0.009651	0.333	0.1912	0.49923	0.48017	0.14319	0.46486	0.98693	0.75521
cStage	0.073896	0.0049405	0.018754	0.083328	0.080245	0.12861	0.10298	0.16457	0.15389	0.15198	0.11543	0.13323	0.035975	0.12999	0.15768	0.18281	0.29334	0.34774	0.18152	0.24351	0.25186	0.33464	0.13327	0.092976	0.069095	0.078707	0.25748	0.59178	0.21364	0.091907	0.052723	0.26392	0.46624	0.033922	0.39493	0.091365	0.12136	0.16475	0.16826	0.013446	0.076783	0.0070866	0.0037167	0.0023197	0.00058823	0.013281	0.0055469	0.022267	0.0088195
BMI	0.079055	0.1982	0.27955	0.1801	0.25042	0.50876	0.11898	0.14965	0.14192	0.29578	0.31354	0.29511	0.57886	0.51663	0.24446	0.10894	0.17089	0.018846	0.066123	0.1951	0.27178	0.40694	0.36594	0.16592	0.065439	0.20431	0.46801	0.036664	0.71356	0.31563	0.18764	0.096509	0.16024	0.28888	0.74238	0.81275	0.54455	0.37523	0.21374	0.07036	0.36259	0.069192	0.17753	0.082035	0.10368	0.25618	0.041495	0.092487	0.22877
Glutamic acid	0.015746	0.0212	0.046052	0.063758	0.11619	0.36685	0.085667	0.085761	0.087481	0.094817	0.04464	0.087352	0.071039	0.080484	0.036965	0.058272	0.071353	0.045616	0.085788	0.034087	0.083329	0.066907	0.053844	0.057625	0.040784	0.11922	0.031438	0.054213	0.12621	0.0051264	0.016187	0.026109	0.074286	0.047638	0.014352	0.026207	0.013405	0.023988	0.081545	0.0040135	0.00022973	0.04757	0.086912	0.066767	0.046316	0.013312	0.005637	0.087368	0.075127
Lactic acid	0.014292	0.015637	0.022133	0.0051237	0.11858	0.025074	0.049356	0.07322	0.045387	0.062012	0.059205	0.063854	0.079492	0.08074	0.24296	0.10163	0.14517	0.083852	0.025427	0.093572	0.10234	0.35558	0.17708	0.019797	0.020478	0.0047644	0.12705	0.24887	0.016094	0.079517	0.11847	0.046065	0.12483	0.030882	0.23952	0.16527	0.07426	0.098357	0.29775	0.14011	0.3624	0.0051511	0.0042846	0.030708	0.030035	0.056471	0.064239	0.11447	0.0353
Fructose	0.18055	0.19546	0.25107	0.20408	0.52536	0.46621	0.43091	0.48199	0.4382	0.6712	0.46029	0.5397	0.72322	0.85189	0.4087	0.39048	0.55166	0.19218	0.27577	0.42454	0.72038	0.84944	0.68548	0.32487	0.23241	0.31992	0.10991	0.064709	0.57184	0.077313	0.25195	0.20769	0.56123	0.53424	0.50417	0.71721	0.29726	0.57818	0.88353	0.24591	0.14118	0.089536	0.10678	0.07032	0.042925	0.044231	0.0038529	0.0068402	0.04718
O60684	0.34228	0.094503	0.17268	0.043902	0.19381	0.098353	0.44843	0.49632	0.35758	0.49301	0.30456	0.31416	0.40546	0.50845	0.47884	0.70483	0.92379	0.75805	0.27882	0.15972	0.39865	0.68489	0.41478	0.23442	0.19036	0.028523	0.018368	0.038725	0.09755	0.12029	0.080357	0.40834	0.35356	0.48157	0.28487	0.3051	0.14446	0.44302	0.86922	0.71137	0.24921	0.13857	0.073196	0.3936	0.19242	0.070962	0.13167	0.036775	0.33787
Q9BVG4	0.025711	0.048965	0.021769	0.050684	0.079739	0.19062	0.030726	0.037015	0.015687	0.014892	0.011447	0.043917	0.036742	0.014312	0.095368	0.023013	0.018242	0.13894	0.20815	0.056069	0.017426	0.068088	0.048836	0.013534	0.071743	0.094987	0.12351	0.6175	0.020017	0.059614	0.030591	0.084091	0.13381	0.0048902	0.022526	0.072458	0.057086	0.029717	0.10115	0.035975	0.10781	0.096988	0.12176	0.13079	0.21716	0.087662	0.22933	0.90868	0.34705
FIBR	0.50563	0.48983	0.83358	0.41059	0.15501	0.60644	0.49242	0.47536	0.43469	0.58656	0.65733	0.31342	0.69652	0.61808	0.42568	0.83663	0.92138	0.27922	0.094847	0.17945	0.30126	0.20478	0.32072	0.48898	0.20272	0.22435	0.96573	0.059557	0.87633	0.82352	0.41992	0.28687	0.082086	0.9477	0.76214	0.52789	0.64499	0.40391	0.18368	0.40143	0.84764	0.52474	0.87924	0.67033	0.96214	0.95182	0.97172	0.48334	0.36351
PLT	0.14344	0.19868	0.36334	0.087341	0.13472	0.2502	0.38706	0.36952	0.26997	0.42333	0.3992	0.30066	0.68539	0.52396	0.28358	0.73178	0.8254	0.13535	0.019381	0.077976	0.2019	0.16643	0.27612	0.21168	0.063979	0.054886	0.36435	0.014066	0.45336	0.41594	0.27589	0.16408	0.029711	0.44455	0.41024	0.34623	0.23941	0.13731	0.21816	0.27595	0.41014	0.17617	0.41695	0.87747	0.63576	0.33637	0.4522	0.062056	0.92203
LIMF	0.24619	0.23602	0.27692	0.1268	0.30345	0.61073	0.56857	0.54936	0.42034	0.52106	0.30067	0.28656	0.54734	0.5273	0.4323	0.66725	0.72033	0.45666	0.33299	0.09759	0.26497	0.32545	0.26851	0.15405	0.11919	0.13976	0.094493	0.042351	0.14651	0.049728	0.23484	0.10848	0.14633	0.33837	0.04392	0.19202	0.048788	0.13464	0.65378	0.35798	0.13221	0.25776	0.26379	0.73332	0.52606	0.087401	0.20587	0.16784	0.67742
ypN	0.48981	0.21233	0.12715	0.52021	0.74241	0.57718	0.84621	0.90012	0.85637	0.74684	0.50637	0.63942	0.41574	0.63242	0.50811	0.85688	0.97899	0.53303	0.79978	0.96697	0.9265	0.89715	0.66507	0.46363	0.85352	0.71983	0.1993	0.76511	0.35225	0.080091	0.46658	0.79244	0.61929	0.30358	0.36413	0.34405	0.29995	0.63732	0.82589	0.34829	0.14763	0.21346	0.13	0.12285	0.090004	0.019063	0.084171	0.14731	0.055196
ypT	0.68315	0.71095	0.99673	0.6642	0.95072	0.7286	0.96655	0.9882	0.97883	0.92141	0.93949	0.94939	0.94409	0.77771	0.95867	0.97517	0.76065	0.95907	0.39202	0.30089	0.37462	0.90583	0.33825	0.92932	0.5444	0.18875	0.95282	0.2941	0.77397	0.95528	0.25106	0.59754	0.26058	0.83786	0.99517	0.61497	0.93744	0.36144	0.68562	0.79486	0.71709	0.82107	0.80753	0.69622	0.67533	0.8428	0.61168	0.99066	0.87443
Uracil	0.4335	0.1073	0.088284	0.14893	0.34057	0.037172	0.24812	0.28	0.24565	0.25655	0.14144	0.29883	0.13239	0.24005	0.27622	0.24554	0.27025	0.96263	0.99085	0.68817	0.81504	0.78032	0.88334	0.32947	0.77167	0.39542	0.0063887	0.7728	0.064355	0.14188	0.16826	0.92868	0.71834	0.31573	0.31967	0.36056	0.20516	0.92726	0.63488	0.62601	0.13459	0.18768	0.098033	0.067096	0.047374	0.067391	0.053247	0.34714	0.053867
Gly-Gly	0.099881	0.42451	0.70176	0.45234	0.58667	0.91959	0.32039	0.30561	0.44358	0.49564	0.6104	0.29799	0.60767	0.55041	0.33651	0.30043	0.31417	0.013016	0.04144	0.26199	0.43257	0.28682	0.41467	0.35015	0.10433	0.40881	0.81722	0.099734	0.85536	0.39526	0.78681	0.01673	0.071778	0.55052	0.65176	0.48999	0.44097	0.25471	0.079572	0.058564	0.38368	0.15586	0.49161	0.43368	0.41924	0.76318	0.27146	0.32579	0.41074
Alpha-Tocopherol	0.073186	0.05976	0.07158	0.20213	0.23053	0.23998	0.27927	0.35204	0.35658	0.29935	0.29684	0.22537	0.1297	0.27458	0.34328	0.45346	0.59831	0.25321	0.072087	0.4544	0.27061	0.40723	0.10486	0.14053	0.078995	0.16345	0.96392	0.94954	0.47875	0.080949	0.54697	0.12267	0.40392	0.094493	0.46931	0.14363	0.18401	0.066023	0.079773	0.066131	0.46668	0.043728	0.020189	0.03659	0.018176	0.052442	0.080669	0.018888	0.064443
1	5-Anhydro-D-gluc	0.031988	0.021372	0.056643	0.15487	0.10827	0.16799	0.1436	0.17761	0.13493	0.1596	0.14897	0.29747	0.12504	0.14636	0.091952	0.22186	0.29882	0.092841	0.032554	0.21103	0.16307	0.14809	0.10502	0.20965	0.12063	0.16316	0.38753	0.5802	0.63035	0.19796	0.039365	0.30695	0.23244	0.07355	0.4332	0.12125	0.22149	0.049312	0.035782	0.0071665	0.041879	0.053918	0.12638	0.042122	0.026058	0.054214	0.036904	0.038899
Hypoxanthine	0.24053	0.23585	0.23286	0.33741	0.26709	0.1347	0.12299	0.14253	0.16431	0.16689	0.27849	0.32173	0.26016	0.22772	0.19954	0.16911	0.18204	0.28806	0.27559	0.63579	0.45299	0.35986	0.5942	0.34966	0.46184	0.45272	0.68679	0.91753	0.56765	0.94268	0.44267	0.75694	0.61747	0.22538	0.87086	0.68086	0.88232	0.76	0.26694	0.22139	0.6996	0.20095	0.35906	0.14367	0.21994	0.60991	0.45124	0.65287	0.32455
Ribose	0.13151	0.2157	0.3874	0.22991	0.45558	0.74513	0.57897	0.6222	0.55793	0.83434	0.74543	0.59421	0.94939	0.97227	0.44165	0.76159	0.99557	0.13445	0.065266	0.28064	0.58903	0.56837	0.58632	0.34032	0.1077	0.1909	0.5417	0.020941	0.91794	0.30748	0.37512	0.13345	0.17413	0.55113	0.84843	0.74747	0.46642	0.3432	0.43629	0.11069	0.29008	0.051461	0.2078	0.24956	0.1632	0.13718	0.047239	0.0030018	0.16395
Pyrophosphoric aci	0.027873	0.08491	0.16686	0.044923	0.064307	0.39057	0.087916	0.1136	0.03359	0.10997	0.07171	0.065286	0.17908	0.12268	0.36277	0.11907	0.12342	0.0067146	0.015121	0.018291	0.024168	0.14564	0.061055	0.030396	0.0084241	0.027464	0.38996	0.10172	0.12814	0.063192	0.033558	0.0040665	0.017933	0.13594	0.058983	0.17533	0.054093	0.013926	0.067616	0.056176	0.32426	0.087819	0.16356	0.36622	0.26416	0.23862	0.16237	0.57842	0.64546
Cysteinylglycine	0.26615	0.40038	0.32544	0.074459	0.21503	0.17941	0.12472	0.091875	0.13629	0.09889	0.10813	0.032778	0.17007	0.099852	0.18049	0.11941	0.12521	0.37175	0.2829	0.063999	0.091347	0.18493	0.16174	0.089975	0.20035	0.076321	0.044583	0.028126	0.0083396	0.074097	0.32632	0.053942	0.088389	0.42856	0.04762	0.18509	0.14585	0.39044	0.6117	0.87664	0.48616	0.49708	0.37173	0.92524	0.92018	0.63563	0.9913	0.76896	0.56623
Glucose-6-phosphat	0.30095	0.17707	0.22141	0.38225	0.45081	0.33973	0.40182	0.45405	0.41289	0.66503	0.46398	0.54552	0.63222	0.85813	0.28463	0.43271	0.47087	0.30872	0.63919	0.94055	0.71008	0.7226	0.66326	0.42866	0.52117	0.89099	0.21949	0.41445	0.77152	0.30037	0.56246	0.61038	0.87709	0.50031	0.86308	0.89994	0.40786	0.79899	0.92465	0.11636	0.16011	0.049613	0.18055	0.021474	0.010347	0.058205	0.0010495	0.020109	0.013437
Cellobiose	0.010406	0.057026	0.076	0.05898	0.34657	0.21556	0.088348	0.093126	0.091985	0.14693	0.11663	0.13457	0.24041	0.17708	0.088902	0.054925	0.092935	0.026539	0.049041	0.16579	0.26475	0.32444	0.37189	0.10707	0.15281	0.12514	0.040399	0.064949	0.13021	0.023888	0.066161	0.023898	0.19847	0.20939	0.24224	0.31447	0.17227	0.26633	0.39476	0.041009	0.032634	0.015635	0.083073	0.039587	0.042713	0.056431	0.008568	0.12779	0.01478
Ribulose-5-phospha	0.0040105	0.0144	0.017628	0.020082	0.046292	0.17129	0.071666	0.073219	0.042155	0.077542	0.039455	0.02007	0.10411	0.089834	0.041031	0.12973	0.14935	0.02927	0.02204	0.046741	0.081572	0.035203	0.10326	0.0077295	0.013801	0.062285	0.11212	0.076734	0.055751	0.0033341	0.12475	0.0025611	0.042729	0.040064	0.025561	0.055618	0.010094	0.028883	0.068716	0.0032068	0.038628	0.0033989	0.042125	0.08702	0.043971	0.0080175	0.012743	0.05382	0.11832
Q9BTW9	0.090752	0.1697	0.19344	0.095257	0.22039	0.11704	0.11886	0.10711	0.11528	0.21002	0.14041	0.18403	0.35387	0.35993	0.096228	0.11174	0.089746	0.025974	0.14709	0.26845	0.52764	0.23178	0.68563	0.1442	0.14441	0.38432	0.058267	0.050438	0.27234	0.10986	0.45245	0.13699	0.2689	0.30744	0.21028	0.43416	0.10161	0.52263	0.42102	0.17165	0.10382	0.10153	0.2265	0.11662	0.09287	0.11579	0.015115	0.059419	0.15123
P10620	0.088975	0.057471	0.16	0.011996	0.21317	0.15319	0.22625	0.24685	0.20492	0.24028	0.15385	0.10147	0.16379	0.19757	0.43139	0.32429	0.41406	0.19566	0.061186	0.031537	0.15029	0.44872	0.17022	0.082739	0.031523	0.0032332	0.037214	0.016713	0.012172	0.033471	0.082008	0.023526	0.05803	0.25426	0.068209	0.083277	0.023467	0.10032	0.60779	0.40485	0.16009	0.063599	0.032639	0.36847	0.20951	0.12783	0.14274	0.14472	0.23469
P41567	0.33808	0.20521	0.20545	0.39358	0.69518	0.28511	0.56273	0.54882	0.76567	0.5638	0.62159	0.96422	0.61886	0.62942	0.15573	0.62352	0.8106	0.98365	0.52707	0.67837	0.79296	0.56127	0.61959	0.71882	0.69196	0.47359	0.16709	0.41133	0.79977	0.72167	0.38066	0.68257	0.77462	0.22095	0.96996	0.45362	0.75341	0.65742	0.68465	0.29346	0.062631	0.25428	0.29274	0.13757	0.20219	0.11271	0.19715	0.017992	0.058249
Spermidine	0.0059447	0.009628	0.06707	0.029226	0.07217	0.30943	0.087886	0.084224	0.10475	0.1218	0.087699	0.044357	0.091508	0.11185	0.034729	0.15311	0.1555	0.010649	0.0089718	0.020587	0.13905	0.025417	0.11327	0.035562	0.0044296	0.047852	0.17468	0.011881	0.13045	0.038131	0.12561	0.0041332	0.008929	0.045858	0.055814	0.018717	0.0066747	0.022112	0.022333	0.00034778	0.0030088	0.0032302	0.056629	0.09187	0.040968	0.037578	0.0087456	0.016914	0.056352
Ornithine	0.029676	0.055647	0.26701	0.1026	0.2178	0.53897	0.27137	0.29091	0.30274	0.34809	0.3549	0.25141	0.30259	0.31883	0.25045	0.4376	0.5092	0.022041	0.0038462	0.055846	0.18801	0.1602	0.13848	0.18727	0.01353	0.043028	0.68167	0.049482	0.49331	0.26276	0.18846	0.026958	0.01432	0.17424	0.35865	0.098815	0.10285	0.023565	0.032842	0.013877	0.084155	0.032676	0.14043	0.25445	0.14994	0.22553	0.099903	0.028288	0.14126
Tyrosine	0.02254	0.010247	0.064756	0.060466	0.15192	0.37107	0.24862	0.2989	0.2642	0.33229	0.25274	0.2261	0.23621	0.3386	0.17892	0.45409	0.54793	0.088845	0.031509	0.10987	0.3183	0.18386	0.24207	0.091286	0.013672	0.059453	0.40208	0.11418	0.34365	0.14582	0.17036	0.068767	0.083934	0.047256	0.31767	0.092424	0.04809	0.050082	0.089766	0.0019273	0.030416	0.0016039	0.02325	0.031917	0.011045	0.016811	0.004361	0.00096792	0.0088177
Ascorbic acid	0.017661	0.015361	0.089201	0.06821	0.20791	0.34983	0.26418	0.30323	0.28479	0.34474	0.27729	0.25723	0.25197	0.33381	0.18228	0.43954	0.53531	0.055363	0.015668	0.1203	0.32524	0.2086	0.24196	0.13153	0.021509	0.062775	0.39139	0.11344	0.38341	0.13029	0.17598	0.054257	0.076767	0.083416	0.33541	0.09517	0.058694	0.045479	0.087455	0.0040849	0.028304	0.0037136	0.037092	0.045778	0.017072	0.029104	0.00678	0.0013159	0.0082787
Dehydroascorbic ac	0.0095374	0.0020669	0.012007	0.0037046	0.0051145	0.055728	0.010719	0.011342	0.0085341	0.0082274	0.0046769	0.00086932	0.0030915	0.0029082	0.013528	0.028765	0.038553	0.079149	0.025669	0.002224	0.0090807	0.0093969	0.013007	0.0047994	0.0094021	0.003156	0.015544	0.025034	0.0013175	0.0064775	0.0024098	0.0052451	0.01057	0.02317	0.005912	0.0027253	0.0044418	0.022018	0.046916	0.0071103	0.009834	0.0099293	0.03056	0.17246	0.092985	0.05148	0.09575	0.42633	0.34234
Q9UD71	0.052366	0.030737	0.0964	0.014372	0.14546	0.031588	0.059558	0.060604	0.089134	0.084042	0.072036	0.083309	0.066222	0.095052	0.10905	0.091967	0.075693	0.060527	0.06789	0.086061	0.29269	0.19879	0.37069	0.081746	0.04215	0.039431	0.04016	0.062892	0.029411	0.1721	0.22257	0.1128	0.10337	0.082975	0.15557	0.081329	0.026985	0.24064	0.30177	0.14945	0.061833	0.030078	0.042854	0.081392	0.061297	0.14578	0.048671	0.10068	0.051649
Uridine 5'-diphosp	0.2843	0.17482	0.21308	0.42309	0.78522	0.82407	0.95596	0.93389	0.88558	0.89705	0.95528	0.94683	0.89625	0.87474	0.77514	0.98382	0.76931	0.99545	0.74141	0.9749	0.66359	0.63876	0.81548	0.60019	0.55848	0.48077	0.42535	0.70605	0.63753	0.34833	0.67025	0.64393	0.82919	0.30773	0.87289	0.75224	0.55392	0.81509	0.70425	0.20158	0.17847	0.02533	0.043634	0.018957	0.020609	0.028361	0.010826	0.0057799	2.7786e-05
Stearic acid	0.31127	0.10414	0.26591	0.26343	0.73433	0.38109	0.69348	0.80623	0.70549	0.93682	0.67719	0.85754	0.67645	0.95233	0.65946	0.78069	0.95229	0.53848	0.49251	0.77518	0.6957	0.78339	0.7257	0.65614	0.50815	0.36988	0.14511	0.35542	0.58923	0.34372	0.24016	0.67063	0.96164	0.5905	0.97949	0.70486	0.37249	0.94631	0.71967	0.2385	0.099965	0.038049	0.081973	0.032184	0.010138	0.055751	0.0019011	0.0073865	0.00055728
LNY	0.19431	0.11496	0.18312	0.16796	0.68571	0.12371	0.36706	0.45447	0.42844	0.58702	0.4242	0.58083	0.41553	0.6726	0.56786	0.35769	0.45892	0.2479	0.33558	0.84914	0.86281	0.7464	0.86611	0.44602	0.42382	0.33475	0.12036	0.5236	0.37197	0.16544	0.40386	0.42496	0.91192	0.50229	0.85154	0.72528	0.31812	0.93539	0.8209	0.3951	0.24938	0.041766	0.032833	0.0076146	0.0030963	0.063044	0.0014071	0.013271	0.0002756
Niacinamide	0.0062582	0.0070359	0.018645	0.0078397	0.01606	0.1946	0.03134	0.022248	0.030834	0.015682	0.0089174	0.0024238	0.012117	0.0083882	0.0064747	0.061952	0.046845	0.065954	0.037468	0.0012245	0.012899	0.00068023	0.012584	0.0025083	0.0024581	0.01726	0.039212	0.013756	0.0029396	0.0068466	0.06239	0.0019806	0.0013851	0.0039049	0.00021869	0.00028556	0.00014684	0.0030096	0.013119	0.001316	0.001135	0.014766	0.066976	0.28144	0.21016	0.03034	0.11351	0.26524	0.3875
Iditol	0.043105	0.068401	0.19537	0.048929	0.11076	0.20679	0.062238	0.074602	0.076257	0.14075	0.17206	0.15732	0.28217	0.22789	0.13674	0.099644	0.13031	0.015044	0.016707	0.053611	0.15162	0.17729	0.24692	0.10775	0.022135	0.041037	0.27137	0.011904	0.31543	0.426	0.090889	0.09096	0.03467	0.14492	0.52349	0.34647	0.25858	0.19627	0.11317	0.049657	0.18421	0.035577	0.13423	0.13433	0.13477	0.30178	0.08902	0.10745	0.22754
Glutamine	0.018697	0.0069876	0.01296	0.0084198	0.0012858	0.014482	0.0022523	0.0028967	0.0014821	0.0013963	0.0023678	0.002214	0.0024797	0.0013968	0.013648	0.012464	0.0083684	0.052317	0.034527	0.011171	0.0064677	0.0041766	0.019651	0.0040696	0.010313	0.015995	0.11992	0.22502	0.010285	0.13279	0.023016	0.069134	0.022767	0.0039541	0.038369	0.01587	0.026204	0.033252	0.0099286	0.013382	0.12145	0.033476	0.070892	0.14007	0.13257	0.16105	0.2654	0.717	0.59124
WBC	0.12463	0.096854	0.12174	0.012033	0.035306	0.020373	0.083276	0.083831	0.045199	0.089817	0.052894	0.074277	0.15842	0.13261	0.15976	0.15068	0.18461	0.12171	0.053751	0.028582	0.053541	0.17444	0.093352	0.05951	0.047624	0.014741	0.012354	0.013214	0.04615	0.055778	0.0475	0.1299	0.06491	0.25471	0.057879	0.1652	0.058818	0.13214	0.37948	0.56449	0.27069	0.2507	0.14291	0.50673	0.34754	0.14924	0.2478	0.17317	0.91625
NEUTR	0.12788	0.088644	0.11013	0.011723	0.020583	0.0051889	0.057798	0.058795	0.028322	0.05908	0.040931	0.070935	0.11841	0.091375	0.12674	0.12649	0.15599	0.11717	0.037518	0.034365	0.041159	0.14667	0.078919	0.070832	0.064032	0.013762	0.01466	0.030355	0.057295	0.09465	0.035506	0.21144	0.074402	0.25465	0.091126	0.16882	0.091862	0.14142	0.30542	0.61371	0.338	0.3007	0.17278	0.51525	0.36012	0.20147	0.34026	0.21639	0.98386
Q96A35	0.001799	0.0046923	0.0070436	0.0022293	0.019438	0.057794	0.034452	0.034083	0.014795	0.024033	0.0098037	0.024758	0.055348	0.032147	0.02422	0.073625	0.071997	0.023367	0.010675	0.0057158	0.017004	0.013531	0.032668	0.0029955	0.0025788	0.0098306	0.023014	0.03415	0.015647	0.0093724	0.029541	0.012521	0.0083048	0.0036452	0.0046657	0.01375	0.0014757	0.0025866	0.040852	0.0063537	0.0089284	0.0081903	0.033814	0.10149	0.074578	0.0048615	0.02446	0.048394	0.1421
Tocopherol gamma	0.14629	0.091389	0.47528	0.067912	0.12018	0.35056	0.20994	0.23171	0.24334	0.34539	0.30529	0.083333	0.1836	0.30588	0.43296	0.41117	0.40008	0.029585	0.021225	0.049548	0.31287	0.2409	0.30618	0.15992	0.010669	0.030064	0.54806	0.014561	0.18709	0.2796	0.32775	0.013796	0.021726	0.45852	0.27687	0.12252	0.048152	0.17619	0.14588	0.12963	0.31655	0.054711	0.1231	0.4657	0.19753	0.5543	0.16389	0.15501	0.44714
P01833	0.040751	0.0070379	0.0059712	0.0029117	0.03352	0.0012786	0.050528	0.062717	0.057706	0.073939	0.052184	0.039379	0.079193	0.12684	0.051824	0.16484	0.26678	0.30099	0.071008	0.14009	0.21236	0.21351	0.23924	0.018572	0.041975	0.012478	0.011785	0.067237	0.020353	0.034742	0.16963	0.17375	0.2449	0.05223	0.23955	0.14868	0.060607	0.32389	0.4686	0.1748	0.1912	0.0029491	0.0018953	0.019376	0.0083266	0.0047392	0.016461	0.0014863	0.050076
P14735	0.083812	0.038072	0.043403	0.0097503	0.035354	0.0015234	0.045782	0.045836	0.042295	0.074918	0.050081	0.067891	0.12487	0.15109	0.043794	0.11153	0.12956	0.12295	0.079723	0.13523	0.25516	0.15693	0.35319	0.055706	0.077543	0.058426	0.0070291	0.03197	0.063556	0.093304	0.18932	0.26938	0.21094	0.15152	0.20038	0.22441	0.071694	0.43681	0.4333	0.30058	0.1624	0.049597	0.05227	0.090509	0.052128	0.046328	0.036726	0.015009	0.21594
Glycolic acid	0.0037423	0.0022958	0.0027031	0.0039827	0.00051986	0.0541	0.0023954	0.0024588	0.0013199	0.00057081	0.00059201	0.002502	0.0024957	0.00045494	0.0018165	0.0070042	0.0094193	0.061197	0.017347	0.00016313	1.4476e-05	0.00022796	3.3303e-05	0.00087087	0.0018198	0.0032843	0.028198	0.046722	0.0091554	0.018337	0.00025147	0.029879	0.0017093	0.00014735	0.0015579	0.0010688	0.0077594	0.000237	0.0012057	0.0014108	0.0058289	0.044059	0.059265	0.16437	0.18269	0.02772	0.20022	0.42234	0.6893
Succinic acid	0.01244	0.020461	0.067198	0.007067	0.041037	0.24135	0.037979	0.028825	0.038078	0.020327	0.015038	0.013868	0.023502	0.011478	0.03361	0.050003	0.035998	0.039038	0.025123	0.00017452	0.0059339	0.0059176	0.0084718	0.01013	0.0018412	0.0048597	0.034562	0.0044017	0.0039671	0.032753	0.024754	0.0046463	0.00023373	0.0088667	0.00052622	0.00092107	0.0007123	0.0012621	0.023098	0.018198	0.0028473	0.071052	0.1147	0.45895	0.42225	0.12599	0.24699	0.46138	0.54133
Hydroxylamine	0.0095686	0.027668	0.044696	0.0063836	0.0088913	0.081553	0.0053305	0.0028956	0.0052187	0.00087205	0.0013262	0.0018329	0.0020001	0.00026718	0.0093971	0.0066395	0.0025166	0.018563	0.013388	6.5434e-05	8.5343e-05	0.00038263	0.00020568	0.0036982	0.0021572	0.0056277	0.042694	0.0321	0.0015894	0.023013	0.019429	0.0048885	0.00010177	0.0036507	2.9196e-05	0.00014926	0.00097473	0.0001649	0.0018393	0.034314	0.014591	0.20038	0.17755	0.5689	0.59652	0.2362	0.56733	0.96474	0.92317
Glycine	0.010427	0.012052	0.020411	0.016171	0.017207	0.20916	0.048422	0.037888	0.037583	0.011878	0.009985	0.019308	0.013202	0.0041741	0.012533	0.082708	0.081172	0.14845	0.028561	0.00041516	0.00049503	0.00081922	0.00016853	0.0096161	0.005988	0.0080586	0.061861	0.066456	0.014478	0.023163	0.0078992	0.028137	0.00091666	0.0013499	0.00034414	8.386e-05	0.0025509	8.9354e-06	0.003361	0.0065095	0.0018001	0.11601	0.14427	0.48563	0.46632	0.050763	0.4089	0.43107	0.73459
Aminomalonate	0.0039388	0.018488	0.019269	0.0091747	0.0093306	0.10174	0.024893	0.01679	0.014867	0.0075411	0.0098333	0.0075916	0.030578	0.0051876	0.0043219	0.056742	0.07529	0.067395	0.0041085	0.0005539	0.00022891	0.0004887	0.00038148	0.0060322	0.008101	0.0048692	0.051379	0.017348	0.018916	0.015798	0.0098675	0.0098267	0.0003396	0.010225	0.0034142	0.0028567	0.017512	0.000332	0.0040796	0.01244	0.016663	0.084085	0.17829	0.56117	0.53679	0.073835	0.47741	0.37646	0.95245
P21217	0.00017273	0.0011292	0.00083782	0.00042649	0.045769	0.0069154	0.0079529	0.012023	0.0091637	0.0086847	0.0058631	0.012916	0.011502	0.011928	0.034419	0.012597	0.02831	0.016082	0.0028975	0.022921	0.015275	0.11393	0.017647	0.0019002	0.0035215	0.0011937	0.015491	0.11693	0.0035962	0.00056081	0.02454	0.003786	0.044896	0.0029811	0.028899	0.022937	0.0081119	0.0075959	0.081818	0.022734	0.04056	0.0010267	0.00026144	0.0033	0.003488	0.0017691	0.0053335	0.020047	0.0072648
Q9UM54	0.0010099	0.028555	0.016026	0.0063905	0.012277	0.073184	0.0068927	0.005014	0.0046251	0.0078152	0.0098692	0.0056922	0.077906	0.02002	0.00279	0.010023	0.024451	0.0066534	0.0012736	0.0025733	0.00095861	0.0050382	0.0030158	0.0026984	0.0055934	0.0096116	0.029583	0.0012968	0.045301	0.0031043	0.015539	0.0014272	0.0016983	0.030585	0.019241	0.060471	0.058231	0.0086792	0.013788	0.014763	0.049433	0.035822	0.09605	0.21635	0.24087	0.040604	0.13323	0.14063	0.67277
O95793	0.001175	0.033207	0.0064357	0.037841	0.073385	0.025584	0.008469	0.010409	0.018189	0.01552	0.033927	0.058434	0.081374	0.053743	0.0097285	0.0091116	0.025021	0.0095746	0.0044882	0.17	0.030904	0.077366	0.02605	0.01563	0.03054	0.093232	0.24523	0.30861	0.27885	0.024845	0.20678	0.046083	0.126	0.010715	0.30737	0.21994	0.25688	0.045648	0.013748	0.017334	0.21471	0.019288	0.022051	0.0037193	0.015789	0.018814	0.03268	0.015749	0.06955
Q9NTI5	0.0033878	0.048368	0.0059099	0.029093	0.043584	0.0092552	0.0021301	0.0027899	0.0035999	0.0034353	0.011731	0.038852	0.055879	0.020263	0.0080396	0.0014877	0.0053267	0.018799	0.014408	0.13112	0.010396	0.068003	0.020921	0.011747	0.058709	0.078875	0.12255	0.34297	0.15232	0.044082	0.085694	0.099405	0.148	0.0099886	0.25927	0.27873	0.34963	0.078052	0.029754	0.0575	0.30886	0.059192	0.049055	0.012633	0.056409	0.05102	0.11451	0.17362	0.23127
P53041	0.0014036	0.029241	0.035459	0.011204	0.048226	0.034041	0.0036494	0.0017177	0.0061215	0.0031249	0.0033794	0.0061356	0.0095808	0.0035563	0.0021987	0.0011966	0.0005506	0.00050719	0.004763	0.010379	0.013918	0.0067821	0.019392	0.014261	0.018836	0.052945	0.012395	0.027562	0.017107	0.0033306	0.059886	0.0022268	0.0084709	0.032342	0.0032162	0.0096779	0.0063291	0.015231	0.013302	0.021524	0.0040657	0.079798	0.12787	0.13146	0.1457	0.10127	0.070522	0.32385	0.25394
Q08752	0.0019766	0.020937	0.025812	0.0094057	0.14828	0.028773	0.0088683	0.0071773	0.020104	0.0095751	0.010167	0.019751	0.011748	0.0078692	0.015791	0.0022895	0.0038219	0.0069288	0.01013	0.031073	0.033332	0.095867	0.034192	0.030709	0.044589	0.023764	0.0056277	0.060866	0.0095951	0.0017331	0.033543	0.0052335	0.04871	0.048102	0.020878	0.022872	0.022168	0.03904	0.099339	0.06503	0.0078884	0.046609	0.032921	0.042407	0.055944	0.063004	0.03728	0.22658	0.046781
Q12769	0.010835	0.069879	0.061893	0.010745	0.075176	0.010714	0.009886	0.0069777	0.015702	0.015069	0.019863	0.03742	0.066746	0.038637	0.016751	0.0080334	0.0077818	0.0038555	0.0084934	0.040141	0.046486	0.061289	0.077485	0.031922	0.028785	0.044462	0.020142	0.020715	0.053537	0.038996	0.16016	0.035705	0.032747	0.072007	0.066794	0.11012	0.055599	0.090661	0.084529	0.17353	0.089621	0.11102	0.10328	0.12248	0.15652	0.13807	0.10163	0.11977	0.29733
Q9Y5K5	0.010693	0.032907	0.077989	0.005629	0.081989	0.045102	0.033704	0.03251	0.043322	0.068041	0.060101	0.056116	0.14257	0.12256	0.052858	0.050547	0.066669	0.0054287	0.0045901	0.02146	0.09363	0.11463	0.13613	0.033647	0.0073502	0.012083	0.029396	0.00096951	0.066031	0.048575	0.1096	0.01566	0.015433	0.099773	0.11468	0.1245	0.037471	0.09084	0.14157	0.089394	0.06141	0.021919	0.041805	0.09909	0.078365	0.080418	0.027115	0.017293	0.13416
Q9HD42	0.02797	0.03571	0.11311	0.037612	0.081913	0.085873	0.04676	0.044953	0.05326	0.05093	0.033263	0.092144	0.031047	0.038563	0.059547	0.0355	0.036093	0.01086	0.016333	0.02152	0.045294	0.088355	0.027752	0.11692	0.036792	0.045497	0.030593	0.056498	0.1216	0.026202	0.013764	0.052059	0.039026	0.11896	0.025615	0.019711	0.018717	0.017975	0.051403	0.078011	0.0060459	0.20278	0.14019	0.17221	0.11243	0.12875	0.057178	0.15709	0.23746
P0DMN0	0.016921	0.0060407	0.010728	0.0044144	0.014533	0.01037	0.027367	0.033179	0.021626	0.022997	0.0093072	0.021292	0.010151	0.019042	0.046793	0.048629	0.081536	0.075921	0.017431	0.015346	0.012914	0.083997	0.0058403	0.017085	0.014518	0.004704	0.0077066	0.079725	0.017751	0.0009942	0.0062976	0.03578	0.059678	0.041584	0.0098009	0.010662	0.0069322	0.010513	0.0926	0.10322	0.031584	0.062741	0.012491	0.083328	0.035488	0.010968	0.037432	0.048328	0.23501
P46734	0.037268	0.026054	0.066536	0.015879	0.0472	0.087433	0.062214	0.066501	0.057789	0.093037	0.050463	0.085542	0.10918	0.11908	0.058637	0.075949	0.12307	0.048328	0.029868	0.015329	0.055313	0.12231	0.047657	0.060166	0.021513	0.018413	0.0078578	0.0024428	0.10495	0.016935	0.0081096	0.059718	0.042455	0.12916	0.049286	0.073711	0.03447	0.057675	0.17547	0.090224	0.014008	0.080518	0.062331	0.13887	0.079416	0.033622	0.021479	0.024498	0.26317
Q9NPQ8	0.051041	0.061075	0.13907	0.029751	0.10942	0.082194	0.050462	0.052026	0.058754	0.087999	0.072664	0.173	0.15901	0.13511	0.074998	0.044399	0.058086	0.02371	0.036297	0.034252	0.10255	0.17667	0.13558	0.12866	0.046991	0.043051	0.01788	0.0067855	0.17521	0.13898	0.021508	0.15454	0.058966	0.14595	0.15984	0.17082	0.10609	0.13562	0.2006	0.14511	0.028378	0.13966	0.14223	0.138	0.13202	0.14699	0.049406	0.083198	0.2231
Q9NX40	0.068552	0.046549	0.11328	0.028986	0.2211	0.030671	0.040825	0.051581	0.067441	0.069807	0.061639	0.1302	0.046997	0.073737	0.18987	0.029822	0.030832	0.051115	0.098401	0.13902	0.24842	0.45495	0.31282	0.14463	0.10511	0.051378	0.030862	0.18273	0.045294	0.14282	0.07465	0.16584	0.25518	0.13731	0.22941	0.15922	0.089379	0.3065	0.42373	0.26956	0.095401	0.083361	0.04228	0.038727	0.038966	0.20949	0.043018	0.2706	0.035791
Q14126	0.018243	0.010105	0.011692	0.0072348	0.0059501	0.0079267	0.0051242	0.0068259	0.011354	0.0079176	0.0097962	0.002907	0.0045143	0.0092313	0.016663	0.013203	0.038804	0.070047	0.010813	0.019237	0.0061179	0.053679	0.0020564	0.0092701	0.012058	0.0041467	0.039629	0.052468	0.022748	0.0030667	0.019695	0.017993	0.047855	0.051652	0.056118	0.02616	0.054719	0.043862	0.04068	0.09031	0.15113	0.045447	0.0087425	0.06833	0.04234	0.050849	0.10876	0.10263	0.45464
O75477	0.006708	0.0067596	0.011636	0.0080935	0.012464	0.018325	0.00092453	0.0006875	0.0037435	0.0006749	0.0012052	0.00033539	0.00016337	0.00016544	0.0018962	0.00064193	0.00097374	0.033953	0.026424	0.0080427	0.0058056	0.0088255	0.0049383	0.0076205	0.026049	0.014635	0.0098939	0.067816	0.0014919	0.0032383	0.0096394	0.006773	0.02563	0.019336	0.0069658	0.0024883	0.013397	0.039643	0.023081	0.019648	0.0099374	0.042312	0.035946	0.085286	0.082531	0.10525	0.12995	0.6243	0.31067
Q13595	5.0157e-05	0.00090236	0.00017105	0.0016555	0.0060272	0.0071911	0.00028199	0.000194	0.0016937	0.00013366	0.0004254	9.1432e-05	0.00030057	0.00016314	4.3527e-05	0.00057787	0.0015347	0.016424	0.0038069	0.0085462	0.0017084	0.0012786	0.00083724	0.00018284	0.0034852	0.0084812	0.019902	0.082159	0.0019927	0.00014636	0.041018	0.001076	0.01199	0.00028126	0.0053433	0.001297	0.0058784	0.0051963	0.0024402	0.0008244	0.0079727	0.0022597	0.0036361	0.010689	0.017067	0.0052979	0.03627	0.10284	0.098252
Q14244	0.0090858	0.0031623	0.013968	0.011066	0.016348	0.064596	0.0064793	0.0098779	0.01567	0.012239	0.0085479	0.011926	0.003302	0.010335	0.021495	0.0063197	0.013702	0.022797	0.020558	0.0093711	0.012434	0.054262	0.0041182	0.0139	0.0045942	0.0097238	0.033693	0.04714	0.036986	0.0049212	0.0035959	0.015129	0.036413	0.014295	0.024933	0.0092784	0.013608	0.014736	0.02261	0.0084038	0.0079743	0.022996	0.0072542	0.015809	0.0098646	0.02515	0.011068	0.084831	0.10596
Q9UK41	0.061757	0.029784	0.071761	0.035566	0.040356	0.053457	0.031763	0.037604	0.050688	0.071461	0.05841	0.074488	0.071209	0.097421	0.034998	0.036093	0.083106	0.068225	0.042248	0.044896	0.076806	0.15837	0.054596	0.10279	0.057818	0.03611	0.015479	0.0082037	0.18645	0.040248	0.0072833	0.12994	0.11221	0.19437	0.19284	0.13515	0.15076	0.19072	0.16831	0.10102	0.03417	0.093221	0.061154	0.07318	0.04507	0.074831	0.028161	0.039426	0.26411
Q96JB2	0.054698	0.052712	0.046468	0.021369	0.13968	0.0043682	0.019874	0.025706	0.053368	0.066266	0.075258	0.096847	0.10794	0.15377	0.059634	0.019272	0.046582	0.068417	0.069458	0.24853	0.27294	0.45913	0.30265	0.087517	0.10835	0.06366	0.016148	0.054578	0.11332	0.069302	0.17345	0.19724	0.37687	0.17196	0.50894	0.42661	0.27679	0.61737	0.49354	0.32954	0.23735	0.038308	0.012311	0.0065176	0.0095421	0.066792	0.013082	0.014173	0.040486
Q9BXW7	0.029989	0.020571	0.094152	0.0065714	0.042465	0.022151	0.016769	0.020664	0.026157	0.054611	0.055307	0.053595	0.089466	0.095479	0.058722	0.032252	0.048747	0.010428	0.0097069	0.024908	0.11705	0.15613	0.18814	0.060806	0.014747	0.0087378	0.025103	0.0013113	0.079666	0.161	0.030312	0.067758	0.034414	0.14317	0.2783	0.17688	0.095468	0.23473	0.18375	0.099541	0.080573	0.022208	0.042049	0.069572	0.047516	0.16841	0.029046	0.048415	0.14327
Q96DE0	5.6111e-05	0.00064843	0.0024332	0.00033319	0.019046	0.027621	0.0015777	0.0016807	0.0051089	0.00523	0.0049007	0.0016519	0.012083	0.0095401	0.0015418	0.0022703	0.0077994	0.0031811	0.0012878	0.0027216	0.013899	0.01925	0.017955	0.0010238	0.00079943	0.0013226	0.0038468	0.00030435	0.0044243	0.00069608	0.010945	0.00020829	0.0044995	0.0063398	0.024182	0.015581	0.0077122	0.024263	0.03602	0.0010494	0.0021427	9.3877e-05	0.0015012	0.0064541	0.006321	0.0047991	0.0016773	0.014039	0.020251
Q9Y262	0.0083425	0.053164	0.050049	0.013164	0.073076	0.019595	0.0036593	0.0019638	0.023901	0.0080872	0.027038	0.005771	0.028684	0.018349	0.0028667	0.0037806	0.0062989	0.013491	0.0087359	0.039135	0.048003	0.02968	0.055755	0.019111	0.023872	0.032167	0.051043	0.0079865	0.026378	0.041412	0.29718	0.010104	0.019562	0.057154	0.13217	0.069679	0.10017	0.17424	0.047799	0.083541	0.10516	0.036414	0.051827	0.094371	0.14646	0.20584	0.17671	0.15561	0.28446
Q9Y3L3	0.0023568	0.029906	0.056686	0.0032377	0.030639	0.029201	0.0026537	0.0011683	0.0086485	0.0037109	0.010586	0.0019018	0.017848	0.004956	0.0022879	0.0030085	0.0051849	0.0025689	0.00047826	0.0013529	0.0046742	0.007191	0.0085718	0.011177	0.0062912	0.0030903	0.015926	0.00011485	0.0081747	0.014987	0.04397	0.00068743	0.00034359	0.064031	0.024276	0.016182	0.032314	0.02947	0.01827	0.053073	0.029183	0.050634	0.091228	0.28535	0.30432	0.23633	0.25146	0.28764	0.54593
Q6P1N9	0.002447	0.0093907	0.0394	0.010702	0.055358	0.10762	0.012582	0.011817	0.041072	0.035052	0.043977	0.015062	0.043023	0.052389	0.008611	0.018492	0.029081	0.0030029	0.0030149	0.015804	0.071424	0.031744	0.057124	0.016826	0.0022413	0.018932	0.084677	0.0015598	0.075221	0.025972	0.11905	0.0023052	0.0074383	0.031913	0.10379	0.035529	0.025864	0.054267	0.020439	0.002645	0.011188	0.0025889	0.016587	0.025738	0.021543	0.052307	0.0091578	0.012073	0.051249
Q9Y2S7	0.0033097	0.0062122	0.033509	0.0028833	0.012241	0.074454	0.0044644	0.0046369	0.013969	0.012476	0.01578	0.0030361	0.014894	0.018864	0.011629	0.010653	0.015292	0.0025862	0.0017917	0.0015616	0.013566	0.01359	0.012125	0.0040083	0.00010985	0.0025481	0.074968	0.00048452	0.022734	0.021194	0.052932	0.00072974	0.00085682	0.016088	0.03371	0.013025	0.0083422	0.017174	0.0086667	0.0054271	0.025866	0.005587	0.012532	0.064502	0.048128	0.078686	0.034439	0.051701	0.22016
Q10713	0.006788	0.048019	0.092952	0.010607	0.073094	0.056296	0.02053	0.017529	0.038903	0.044859	0.053408	0.02828	0.091498	0.075024	0.028555	0.023234	0.043395	0.0018024	0.0007306	0.014859	0.035903	0.079463	0.03334	0.035272	0.0072124	0.011144	0.048332	0.00056175	0.091308	0.013563	0.094987	0.0026244	0.0071435	0.15404	0.091276	0.087118	0.057659	0.05028	0.054219	0.091379	0.073739	0.050101	0.054158	0.14217	0.11524	0.12641	0.060955	0.029689	0.2858
Q7Z406	0.011268	0.020809	0.13876	0.0056234	0.040629	0.10254	0.021757	0.024001	0.029949	0.047191	0.043657	0.01728	0.041978	0.044677	0.089933	0.033764	0.048241	0.0012777	0.00062901	0.0019372	0.02405	0.084599	0.028628	0.034635	0.0015251	0.0011967	0.066805	0.00032572	0.038324	0.031991	0.016536	0.00085481	0.0013905	0.15618	0.055444	0.03446	0.018977	0.024586	0.047304	0.057312	0.053789	0.035249	0.046849	0.21912	0.12222	0.23855	0.073888	0.13933	0.32292
Q9P2R7	0.00085055	0.0055495	0.0067918	0.0030172	0.012754	0.030717	0.0052673	0.0066051	0.012355	0.016007	0.02138	0.0091711	0.047782	0.044093	0.0063542	0.014206	0.043213	0.005943	0.00057828	0.011468	0.011201	0.03078	0.0082235	0.0027587	0.00065078	0.0038602	0.069908	0.0028211	0.077537	0.0061189	0.053021	0.0031133	0.0084466	0.0139	0.10888	0.066181	0.052958	0.021263	0.014237	0.0069411	0.069766	0.0022186	0.0039486	0.014659	0.014146	0.010359	0.012057	0.0017917	0.12779
Q16740	0.028501	0.026037	0.047009	0.014058	0.059644	0.030335	0.031685	0.032121	0.07003	0.079644	0.087768	0.037343	0.11465	0.13317	0.018253	0.055742	0.13865	0.07512	0.01736	0.05687	0.124	0.14629	0.10585	0.053183	0.036977	0.017371	0.01712	0.00070273	0.10094	0.027883	0.076188	0.046889	0.072481	0.18489	0.29121	0.171	0.1621	0.29521	0.22661	0.10252	0.07483	0.016473	0.021027	0.057023	0.03855	0.049241	0.027783	0.0048574	0.15426
O95299	0.067025	0.043524	0.11927	0.0088093	0.023697	0.032306	0.036837	0.031325	0.052609	0.068547	0.074179	0.028609	0.12296	0.11082	0.027991	0.099026	0.13628	0.068398	0.019016	0.013375	0.087803	0.052042	0.12262	0.048952	0.016718	0.0095592	0.023149	2.4388e-05	0.058918	0.14234	0.090236	0.069219	0.012702	0.18438	0.16535	0.10881	0.078629	0.23036	0.16941	0.16187	0.10175	0.054126	0.098927	0.33449	0.23311	0.19708	0.16599	0.053502	0.62012
O75116	0.047493	0.097289	0.16724	0.032853	0.046995	0.11629	0.045664	0.035403	0.072697	0.084813	0.10038	0.031751	0.16764	0.13466	0.023172	0.073806	0.12084	0.029444	0.010156	0.017964	0.05607	0.046577	0.053107	0.060519	0.021194	0.030618	0.066271	4.2608e-05	0.15705	0.053029	0.12516	0.018811	0.0098809	0.27125	0.13708	0.13037	0.12357	0.1449	0.08224	0.12567	0.10988	0.10858	0.16392	0.39466	0.30717	0.21979	0.18757	0.062923	0.80266
P05026	0.015196	0.010878	0.053555	0.0031586	0.0067922	0.039172	0.012862	0.012797	0.019973	0.029464	0.030128	0.0042098	0.036405	0.03883	0.017532	0.043219	0.078892	0.018219	0.0021696	0.0023987	0.019726	0.025215	0.021228	0.012771	0.0019775	0.0013128	0.033844	2.5672e-05	0.029513	0.023932	0.023944	0.0042756	0.0024445	0.10771	0.067841	0.034206	0.029269	0.060309	0.046057	0.039572	0.062734	0.015341	0.030926	0.20051	0.10469	0.10907	0.08275	0.050076	0.50023
P07741	0.0018941	0.00042339	0.0016609	0.00042842	0.0035287	0.0006593	0.0017424	0.0033336	0.0054119	0.0076485	0.0092195	0.0023325	0.0068742	0.017831	0.008616	0.014293	0.036582	0.016128	0.0014432	0.027719	0.035746	0.052906	0.032973	0.0020176	0.0012405	0.0012378	0.039668	0.025745	0.017348	0.010745	0.055628	0.012143	0.039179	0.011764	0.1587	0.043069	0.027684	0.076979	0.040193	0.013612	0.11049	0.00011724	0.00013051	0.0020149	0.00058955	0.008336	0.0043463	0.0017999	0.03481
P35270	0.00014954	7.5792e-05	0.0003083	0.00012487	0.0031443	0.0023544	0.00054741	0.0010764	0.0019693	0.0036821	0.0036685	0.0015232	0.0081093	0.012076	0.0013913	0.003609	0.013622	0.0067843	0.0012048	0.010332	0.020336	0.024787	0.024882	0.00046356	0.00049928	0.001055	0.0092923	0.004203	0.011147	0.0033096	0.015319	0.0047206	0.019587	0.0028089	0.088672	0.034378	0.017078	0.049775	0.031585	0.0011049	0.018617	2.2771e-06	8.7781e-05	0.00038048	0.00021591	0.0011777	0.00031603	0.00091597	0.01182
P08574	2.7765e-05	6.72e-05	0.00012176	4.8905e-06	3.9844e-05	0.00058732	6.708e-05	0.00013963	5.0932e-05	0.00030578	0.00025772	0.00011809	0.0030568	0.0020582	0.00056563	0.0017317	0.0056985	0.0014722	4.481e-05	0.00057082	0.00043265	0.0023117	0.0012158	6.9385e-06	7.9895e-06	7.139e-05	0.0088654	0.0024642	0.0044294	0.00099988	0.0037814	0.0011029	0.0014234	0.0007417	0.014336	0.011103	0.0042673	0.0037228	0.0036924	0.0013838	0.032144	0.00018397	0.00070108	0.0085576	0.004998	0.0019447	0.006238	0.0076692	0.15582
P48637	9.8717e-05	9.8737e-06	2.1974e-05	1.5986e-05	9.7652e-05	8.0274e-05	0.00024165	0.00055564	0.00018216	0.00059766	0.0004527	0.00099056	0.0025394	0.0026717	0.00084506	0.0050344	0.01314	0.0090395	0.00040419	0.004278	0.0028434	0.0058067	0.0050797	9.3059e-05	0.00023188	0.00028702	0.0085083	0.025868	0.0073184	0.0045019	0.003952	0.016173	0.011852	0.00031712	0.037198	0.012529	0.0071947	0.0085316	0.0087119	0.0014356	0.02594	8.3719e-05	0.0003551	0.0021982	0.0010488	0.00061844	0.0032777	0.0031704	0.056071
Q96QR8	0.0039243	0.009632	0.013715	0.0041164	0.00072398	0.0030488	0.00030999	0.00037349	0.0007301	0.0014561	0.005143	0.0020075	0.01249	0.0071274	0.0018465	0.0029804	0.0059715	0.0024875	0.00055115	0.0099589	0.0040609	0.0048688	0.0085859	0.003764	0.0025523	0.0080414	0.10161	0.016942	0.070883	0.066046	0.037884	0.021989	0.007031	0.019492	0.13835	0.068093	0.09262	0.047201	0.0026452	0.016013	0.17956	0.019648	0.041053	0.062838	0.062428	0.12082	0.11547	0.10307	0.54939
O14964	0.00060119	0.0011628	0.0014021	0.00016224	0.00051151	0.0012252	0.001458	0.0016488	0.0006049	0.0034859	0.0024368	0.0014222	0.02452	0.014126	0.0014204	0.013128	0.023049	0.0055627	0.0007987	0.0056422	0.0095778	0.0049005	0.027863	0.00038725	0.0010851	0.0026137	0.0096174	0.0033463	0.014046	0.007671	0.020715	0.0084914	0.0074105	0.0089815	0.038943	0.046031	0.01329	0.033537	0.02483	0.0062272	0.050391	0.00080981	0.010027	0.032562	0.018575	0.0058398	0.012076	0.011437	0.20451
Q14839	0.00018829	0.0029305	0.0020299	0.00036299	0.0012251	0.0011404	0.00018287	0.00017534	0.00023504	0.00087003	0.0017949	0.00098791	0.018167	0.0069348	0.000339	0.0016301	0.0039557	0.00098346	0.00021776	0.0064167	0.0047203	0.0035921	0.016038	0.00042932	0.0012174	0.0041361	0.017706	0.0037125	0.020766	0.011513	0.031828	0.0054265	0.0049652	0.0066884	0.061869	0.059718	0.034946	0.035593	0.0091467	0.0061032	0.06696	0.001929	0.01398	0.022618	0.025745	0.019073	0.023967	0.027097	0.22121
Q92621	0.00061118	0.0013243	0.00073195	0.0001672	0.00022835	0.00055432	0.00041789	0.00041877	0.00040255	0.001057	0.0013473	0.00068464	0.013214	0.006934	0.00023565	0.0053387	0.012223	0.0086211	0.00082713	0.0041641	0.0033227	0.0020536	0.0081706	0.00019322	0.00078265	0.0021458	0.0092072	0.0029755	0.013411	0.0068632	0.023987	0.011677	0.0055943	0.0037419	0.035966	0.032052	0.018628	0.026243	0.011291	0.007481	0.053096	0.0019729	0.0079911	0.02874	0.023789	0.0062472	0.024957	0.010943	0.28801
P57735	0.00051761	0.00021723	0.00019355	0.00038536	0.00018173	0.0024202	0.00082774	0.0010373	0.0014164	0.0011041	0.0009478	0.00060082	0.002234	0.0029271	0.00028679	0.0068489	0.018103	0.020708	0.0013736	0.0025464	0.0011273	0.0017599	0.00040686	0.00019364	0.00030989	0.0013591	0.013548	0.013584	0.013133	0.00079779	0.0094015	0.0081571	0.0065541	0.00085797	0.011552	0.003698	0.0053285	0.0035287	0.0029246	0.0017762	0.01449	0.0021793	0.0018938	0.014375	0.0082828	0.001141	0.013762	0.0052653	0.1993
Q96IU4	0.0032884	0.00018496	0.0011178	0.00024353	0.00082199	0.00013491	0.0029312	0.0049801	0.0039386	0.0080499	0.006292	0.0040327	0.0079711	0.017784	0.006133	0.028762	0.058539	0.02813	0.0019062	0.019355	0.030511	0.031171	0.031455	0.0026872	0.0018341	0.0011183	0.01634	0.022707	0.020106	0.014926	0.022994	0.039344	0.037503	0.011222	0.11393	0.030795	0.017305	0.058704	0.042537	0.014908	0.065154	0.00042648	0.00068393	0.0061036	0.0012439	0.004211	0.0048396	0.00091498	0.063328
P16219	0.0036293	0.00077313	0.0014156	1.7934e-05	0.00075543	0.00022397	0.00044224	0.00067547	0.00049308	0.00065932	0.00019117	0.00025932	0.00055232	0.0013528	0.0080847	0.0022241	0.0035621	0.017331	0.0078781	0.0017401	0.0029715	0.020367	0.0049499	0.00024215	0.00060866	0.00023837	0.0007161	0.012717	0.00010311	0.0006304	0.0068582	0.0065775	0.014079	0.0048161	0.0022602	0.0050535	0.00066178	0.017415	0.056848	0.057724	0.037908	0.0090763	0.0011359	0.028321	0.014836	0.0098812	0.020379	0.078898	0.21795
Q53EL6	0.0011209	0.00025962	0.00028984	6.2279e-06	0.00058702	0.00015911	0.00067649	0.00069829	0.00081911	0.00089729	0.00031833	0.0003357	0.002136	0.002586	0.00080873	0.0045748	0.0092629	0.025348	0.0047308	0.0016485	0.0043413	0.0067132	0.0064469	0.00013784	0.00070339	0.00034255	0.00011636	0.0023484	0.00030565	0.00037774	0.0088443	0.0084617	0.0093067	0.0024477	0.0033542	0.0045609	0.00087462	0.018421	0.048688	0.02142	0.010043	0.0021432	0.0011182	0.021075	0.011501	0.0013569	0.0094746	0.012178	0.14538
O95563	0.008073	0.00020557	0.0015262	4.7212e-06	0.00023698	3.579e-05	0.0013959	0.0022564	0.0006987	0.0022612	0.00061099	0.00085369	0.0019513	0.0035992	0.010172	0.012226	0.021079	0.047849	0.0093874	0.0018967	0.0086036	0.02686	0.019663	0.0010423	0.0019944	5.1943e-05	0.00011297	0.0052523	0.00019424	0.0054069	0.0010098	0.031777	0.020222	0.012795	0.011797	0.010396	0.00217	0.047682	0.12447	0.063062	0.031866	0.0043151	0.0018654	0.041267	0.013661	0.0092942	0.018385	0.050511	0.20234
P30044	0.00093255	3.0036e-06	0.00017104	2.6117e-05	0.00081407	5.3115e-05	0.0010962	0.0025579	0.0018293	0.0018837	0.00092711	0.00083361	0.00013069	0.0015529	0.0094578	0.010164	0.024349	0.025651	0.0013274	0.0073707	0.0085063	0.037558	0.0050314	0.00095642	0.00075909	4.7118e-05	0.0064769	0.069748	0.0012631	0.00097358	0.0032547	0.010883	0.031912	0.0031415	0.025221	0.0024012	0.0018469	0.011292	0.030871	0.011526	0.025407	0.0003018	1.2632e-05	0.0022735	0.0002191	0.0019172	0.0033073	0.0080937	0.024201
Q02338	0.001348	1.6179e-05	0.00049891	1.2027e-05	7.1357e-05	0.0012102	0.00070156	0.0013225	0.00066258	0.002013	0.00078202	0.00030704	0.0018037	0.0034068	0.0024119	0.0078959	0.02159	0.021557	0.0019824	0.00053454	0.0032278	0.0090971	0.0044753	0.00028844	0.00019575	2.6656e-05	0.0012136	0.00097088	0.0016762	0.0017243	0.00028888	0.0067862	0.0057975	0.0048699	0.014413	0.0057427	0.0026891	0.016943	0.031083	0.0043034	0.0097625	0.00033901	0.00056993	0.015422	0.0039645	0.0025317	0.0045663	0.012321	0.13244
P36542	0.0022575	0.00020115	0.0012221	6.9032e-05	1.9999e-05	0.00051418	0.00021062	0.00029234	0.00024212	0.00048412	0.00054737	0.00040189	0.0020167	0.001571	0.00049953	0.0044433	0.0086695	0.017407	0.001918	0.00060571	0.0016738	0.0014451	0.0040955	0.00046737	0.0004223	0.00027245	0.0047034	0.0023829	0.0046907	0.021439	0.0018104	0.026021	0.0029373	0.0023594	0.024274	0.0075114	0.0085452	0.01924	0.0091915	0.0055957	0.019757	0.0030688	0.007459	0.040439	0.025105	0.017127	0.037578	0.045544	0.32324
P49756	0.006035	0.00057162	0.0030458	0.00069889	3.6515e-05	0.00089609	0.00051054	0.00090157	0.00069233	0.001987	0.0017766	0.0012322	0.0031572	0.0054334	0.0017999	0.006565	0.014449	0.015075	0.0027847	0.003655	0.0050261	0.0062521	0.0059091	0.0020661	0.0011267	0.0017	0.014302	0.0074202	0.025645	0.019621	0.0031371	0.03642	0.012791	0.010958	0.053497	0.019436	0.019526	0.036235	0.010694	0.0090512	0.041678	0.0064076	0.0077787	0.026521	0.010944	0.020137	0.020649	0.025008	0.32192
P45973	0.0022601	0.00041852	0.0038382	0.00016026	1.2236e-06	0.0010456	5.4735e-05	5.8213e-05	8.0882e-06	0.00015068	4.9372e-05	5.9624e-05	0.00068857	0.00040988	0.00038198	0.0012042	0.00074702	0.0015946	0.0023878	0.00023747	0.0017171	0.00017278	0.0082695	0.00041341	0.00051365	0.0023898	0.0033725	0.003254	0.0031891	0.015297	0.00087051	0.010435	0.0016456	0.0057183	0.0035763	0.0043514	0.0012794	0.016808	0.0043277	0.0023614	0.0082302	0.0082592	0.035484	0.078914	0.038941	0.04076	0.029316	0.20005	0.46988
P13073	0.0026489	0.00020052	0.0022123	3.9281e-05	3.5059e-06	0.00038535	0.00040682	0.0004665	0.00036141	0.00036369	0.00033182	9.0399e-05	0.00034607	0.00043255	0.0011912	0.008439	0.012975	0.015533	0.00048228	0.00010061	0.00031561	0.00063401	0.00039934	0.00041843	0.00011283	3.0833e-05	0.0078603	0.0039602	0.0018012	0.0085382	0.0018976	0.0097399	0.00061598	0.0038543	0.0052519	0.00068254	0.0014998	0.0032198	0.0030378	0.011395	0.023485	0.0094075	0.0086769	0.10714	0.049583	0.028581	0.087434	0.072284	0.52686
Q9NSK0	0.00022125	0.00014535	0.0011037	6.5042e-05	4.7902e-06	0.0021986	6.6916e-05	8.3828e-05	0.00010678	0.00010103	9.5827e-05	1.6851e-05	0.0001507	0.00021873	0.00041366	0.0015338	0.0022984	0.0010149	6.2863e-05	5.048e-05	5.768e-05	0.00013755	3.2416e-05	3.4875e-05	8.3843e-07	0.00016191	0.021938	0.0050569	0.0037438	0.001359	0.0044123	0.00059447	0.00013508	0.00069253	0.0014559	0.00033013	0.00037039	0.00027488	8.742e-05	0.00099815	0.01371	0.0043479	0.0045384	0.04378	0.021818	0.014161	0.032127	0.047512	0.38709
P54105	0.0020379	0.013561	0.0051479	0.016712	0.024304	0.0055072	0.0016107	0.0021634	0.008117	0.0074952	0.017701	0.022853	0.03354	0.032497	0.0018486	0.0021854	0.010193	0.0071339	0.0034972	0.10076	0.031054	0.055685	0.02251	0.013871	0.02032	0.049707	0.079583	0.079727	0.19855	0.018682	0.093504	0.049724	0.10176	0.019073	0.29915	0.1657	0.21046	0.10237	0.017416	0.017205	0.11315	0.012075	0.010455	0.0015412	0.0047081	0.018524	0.01159	0.0052454	0.071622
P04080	0.0034733	0.0084642	0.0092076	0.009562	0.02644	0.0015323	0.0046918	0.0047863	0.013498	0.015907	0.0278	0.030004	0.050389	0.046681	0.001477	0.012557	0.02999	0.012058	0.0031076	0.10463	0.099308	0.050039	0.10899	0.030213	0.036855	0.04253	0.032164	0.033254	0.1511	0.053694	0.10234	0.090065	0.093935	0.045669	0.36797	0.15402	0.16624	0.2069	0.052207	0.021894	0.058299	0.0054352	0.020701	0.0059709	0.0069445	0.026314	0.010344	0.002384	0.041738
P12268	0.0087792	0.020578	0.0066149	0.010293	0.025859	6.2279e-05	0.0020164	0.0026962	0.0045559	0.0083038	0.014922	0.017863	0.03654	0.032933	0.0059557	0.0041686	0.014461	0.023764	0.01181	0.20465	0.086527	0.13458	0.12705	0.023773	0.095642	0.054784	0.021477	0.1433	0.084833	0.025074	0.10181	0.10923	0.27218	0.088267	0.39409	0.31203	0.27599	0.38314	0.15685	0.12935	0.27979	0.017281	0.016397	0.0051365	0.0074561	0.039068	0.024067	0.033634	0.091255
Q9Y333	0.025894	0.017378	0.0064899	0.023669	0.059083	0.0006786	0.0075771	0.012494	0.020332	0.02048	0.034539	0.098169	0.050058	0.060464	0.018594	0.011333	0.035762	0.1158	0.056457	0.2838	0.13028	0.26568	0.14066	0.060331	0.13245	0.067713	0.034209	0.30952	0.16803	0.11098	0.06857	0.4269	0.46135	0.03581	0.6169	0.33636	0.40118	0.38757	0.21661	0.13085	0.20555	0.025908	0.010031	0.00080151	0.0033283	0.026345	0.019861	0.017515	0.027689
O76003	0.0036268	0.039362	0.013478	0.020706	0.12205	0.0043543	0.0021157	0.0018449	0.016841	0.0070103	0.019984	0.022399	0.026546	0.024151	0.0036899	0.00066173	0.0023212	0.010022	0.015104	0.17925	0.085107	0.11916	0.081643	0.025942	0.066888	0.089003	0.039067	0.12829	0.070846	0.015341	0.26765	0.037992	0.175	0.037161	0.24713	0.16994	0.18584	0.23454	0.083569	0.084248	0.12027	0.02587	0.015205	0.0029294	0.013886	0.056469	0.027621	0.04878	0.035594
Q6P1M3	0.00053397	0.0090823	0.0036788	0.0045528	0.107	0.005802	0.0031436	0.0037859	0.018321	0.012371	0.024759	0.019256	0.040153	0.03725	0.0052027	0.0024743	0.013148	0.012193	0.0046779	0.10669	0.076407	0.15391	0.07841	0.010846	0.024501	0.018347	0.020974	0.036826	0.03983	0.0058504	0.13443	0.013017	0.11106	0.021676	0.27691	0.1599	0.14376	0.17284	0.121	0.033205	0.074677	0.0010265	0.0011038	0.00037833	0.0022131	0.010403	0.0040592	0.0043565	0.003836
O95218	0.0053752	0.010336	0.016387	0.0014239	0.011395	0.0013979	0.00068378	0.00045843	0.0033341	0.0019916	0.0048039	0.00087917	0.0062758	0.0051906	0.0022352	0.0024012	0.0027014	0.0085822	0.0063707	0.017339	0.03405	0.015357	0.062663	0.0047629	0.0086723	0.0093531	0.014669	0.0093626	0.0039461	0.031878	0.12327	0.011401	0.01664	0.027294	0.065089	0.035058	0.025728	0.14678	0.049305	0.052323	0.078559	0.010201	0.020712	0.0553	0.05702	0.11661	0.080771	0.15131	0.22199
P07814	0.00058535	0.019731	0.0085575	0.0016029	0.01502	0.0024947	0.00029887	0.00012297	0.0015342	0.00065174	0.0025491	0.00068394	0.011244	0.0038153	0.00049315	0.00044321	0.00078176	0.001506	0.0011653	0.013237	0.0070118	0.0068471	0.014783	0.0013229	0.0053834	0.012623	0.018214	0.0091805	0.0075992	0.0047736	0.14862	0.0017192	0.0072619	0.014548	0.030159	0.039914	0.030844	0.048456	0.015952	0.041279	0.087557	0.017796	0.026654	0.055756	0.087655	0.067203	0.093412	0.11938	0.30311
P36551	6.3266e-06	0.00044076	8.9914e-05	0.00025898	0.0094289	0.0024191	0.00025332	0.00028902	0.0017181	0.00050298	0.00087848	0.00018697	0.0011724	0.0011941	0.00035027	0.00048863	0.0032207	0.0063852	0.00063917	0.0098268	0.0031181	0.01356	0.0017162	0.00013467	0.0014697	0.0016114	0.0077662	0.027282	0.0018805	2.2709e-06	0.029476	0.00016996	0.015658	0.0015064	0.01458	0.0068518	0.0083761	0.0097284	0.012856	0.0033401	0.016547	0.00030285	0.00015752	0.0017184	0.0024612	0.001258	0.0056786	0.014723	0.028434
A0AV96	0.00045196	0.0056768	0.0026546	0.0016091	0.038313	0.0021127	0.00039262	0.00076339	0.0027811	0.0010419	0.0035131	0.0036045	0.002578	0.0023027	0.014222	0.00022384	0.0020562	0.0070109	0.0015148	0.030217	0.0045274	0.11418	0.004409	0.003418	0.0087552	0.0017564	0.030035	0.1228	0.0063532	0.0017126	0.025933	0.003739	0.051788	0.009742	0.088603	0.047002	0.071251	0.03035	0.041653	0.061794	0.14452	0.0093235	0.00082594	0.0034171	0.0092381	0.036339	0.041633	0.12159	0.050861
Q9BYD3	0.00020897	0.0023398	0.0022435	0.00034223	0.021378	0.00074393	0.0005135	0.0010314	0.0026757	0.0022542	0.0056705	0.0031584	0.0062722	0.006261	0.012476	0.0012311	0.0078235	0.0035572	0.00014383	0.021295	0.0076977	0.10218	0.0091852	0.0023594	0.0027919	0.00033366	0.027031	0.037398	0.0085273	0.0027862	0.028317	0.0023984	0.028069	0.013693	0.13329	0.058813	0.061414	0.036288	0.042892	0.045494	0.15186	0.0016285	0.00026371	0.0028084	0.0042337	0.023295	0.01932	0.024769	0.035945
Q13232	0.049436	0.010155	0.056475	0.0042983	0.011998	0.0058029	0.0077904	0.010408	0.0082996	0.019514	0.011591	0.03322	0.018749	0.029246	0.045218	0.015037	0.01405	0.019903	0.036829	0.015669	0.072678	0.094523	0.12399	0.04463	0.018125	0.011835	0.0046794	0.013063	0.029315	0.12142	0.0063348	0.14584	0.057257	0.073545	0.083627	0.066007	0.024888	0.16522	0.16453	0.11065	0.032144	0.056545	0.048187	0.070054	0.039896	0.12881	0.027531	0.14896	0.2074
Q8WVY7	0.018083	0.0047423	0.025644	0.0032813	0.013891	0.0065696	0.0045263	0.0059098	0.0043872	0.012239	0.005986	0.028927	0.017193	0.020382	0.017759	0.0061466	0.0060226	0.011066	0.032417	0.015702	0.067617	0.065998	0.12736	0.030235	0.02091	0.017705	0.0012112	0.012955	0.025204	0.065469	0.0024986	0.11055	0.061166	0.040263	0.060591	0.059	0.019573	0.13969	0.14472	0.038847	0.0062285	0.025342	0.039771	0.027979	0.018277	0.05471	0.0064268	0.11413	0.084002
O15067	0.00064232	0.00089197	0.0052081	0.00011188	0.011048	0.0050015	0.0041654	0.0038816	0.003655	0.0069728	0.0033184	0.007491	0.017649	0.010481	0.0031505	0.0080338	0.016131	0.0062085	0.0014942	0.0014629	0.014131	0.02193	0.027769	0.0054942	0.0039853	0.00074635	5.2424e-05	0.00017209	0.0041306	0.0027059	0.00098585	0.0078083	0.0057196	0.020949	0.013016	0.014091	0.0045441	0.023531	0.084752	0.014862	0.00075736	0.003753	0.012229	0.040897	0.024534	0.007841	0.0053788	0.02042	0.063416
Q9H0W9	0.003994	0.00014792	0.0023795	8.1259e-05	0.0069173	0.0010366	0.010182	0.013056	0.010572	0.01661	0.0055257	0.0069132	0.0074914	0.018985	0.013836	0.037059	0.058103	0.037824	0.0081924	0.0094852	0.05561	0.056846	0.058746	0.0051072	0.0033566	0.00079337	0.00040642	0.0069499	0.0023049	0.0025388	0.0093489	0.021501	0.036038	0.017934	0.020912	0.0091188	0.0010447	0.048214	0.15066	0.025701	0.0050059	0.0007617	0.00077204	0.012458	0.0020719	0.0017317	0.0010157	0.002458	0.020177
Q16718	0.0035844	0.0045936	0.0049179	0.0012455	0.0031795	0.00093256	0.0014674	0.0023267	0.0022103	0.004773	0.0066341	0.013003	0.023254	0.018474	0.0061985	0.0057275	0.020614	0.011019	0.0010721	0.012401	0.00546	0.042841	0.0073701	0.0063181	0.004378	0.0019482	0.01437	0.010726	0.058995	0.018945	0.0068218	0.048771	0.025311	0.020329	0.13084	0.086379	0.086349	0.03999	0.032387	0.0503	0.1011	0.017325	0.0088382	0.01998	0.018908	0.021053	0.029416	0.011255	0.23161
O94905	0.0028599	0.0037882	0.0050026	0.00069149	0.010025	0.0045273	0.0016973	0.0019077	0.0058646	0.0052129	0.011138	0.005373	0.026999	0.016763	0.0024005	0.0066858	0.022728	0.033855	0.003955	0.0086202	0.01412	0.029123	0.024881	0.0036737	0.0045013	0.0011093	0.0092639	0.0010748	0.013829	0.033493	0.022858	0.026322	0.013008	0.011843	0.14825	0.067192	0.081991	0.094959	0.064404	0.027644	0.058	0.0026066	0.0057848	0.024877	0.034522	0.029309	0.046209	0.023742	0.14829
Q14683	0.040876	0.019551	0.023254	0.0070923	0.0065431	0.0010102	0.0025587	0.0028426	0.0074195	0.0083496	0.017018	0.010942	0.026649	0.025763	0.0056383	0.010665	0.022769	0.073564	0.027381	0.046166	0.047175	0.048011	0.073166	0.022892	0.035646	0.016837	0.01936	0.015622	0.04821	0.12717	0.055008	0.17031	0.078243	0.063439	0.27904	0.1478	0.18184	0.32661	0.11029	0.13101	0.18918	0.038023	0.03713	0.061647	0.063802	0.12697	0.12229	0.091784	0.41844
P33240	0.044642	0.012243	0.012874	0.004929	0.0022986	4.6191e-05	0.0029338	0.0033049	0.0046109	0.0080018	0.0082343	0.0077377	0.015283	0.023229	0.0049304	0.014671	0.024319	0.071455	0.03418	0.064935	0.064586	0.044172	0.087741	0.018891	0.043413	0.027162	0.006567	0.036135	0.037701	0.051753	0.055561	0.18692	0.1359	0.076607	0.16018	0.11136	0.084778	0.32055	0.13497	0.15076	0.154	0.040135	0.029584	0.047496	0.028191	0.056874	0.054239	0.048726	0.37277
P57737	0.061232	0.002367	0.0053315	0.0031552	0.00052885	0.00017089	0.0045448	0.0068603	0.0039659	0.0067539	0.0036452	0.0060343	0.0035004	0.0096621	0.01116	0.026049	0.039451	0.19344	0.080064	0.0339	0.039579	0.040478	0.050698	0.013661	0.036465	0.010994	0.0033789	0.085625	0.01176	0.046197	0.006038	0.25248	0.15108	0.033316	0.076172	0.037135	0.034156	0.19633	0.14904	0.093802	0.075075	0.030455	0.016	0.047529	0.019253	0.029989	0.05058	0.1121	0.33844
P25789	0.0025641	0.0008778	0.00027259	0.003043	0.0056915	0.00036917	0.0015655	0.0017713	0.0038312	0.0026401	0.0035881	0.015924	0.010878	0.0093188	9.7945e-05	0.0053149	0.014296	0.067772	0.019492	0.049473	0.031686	0.014879	0.034108	0.0077711	0.030707	0.024957	0.0028259	0.06652	0.044705	0.024932	0.015272	0.18596	0.10703	0.0022315	0.12723	0.043458	0.067758	0.096053	0.043989	0.0068767	0.0074409	0.0040172	0.0084013	0.0019871	0.0037568	0.0018201	0.0070436	0.0057913	0.036518
Q6PIU2	0.0018108	0.001006	0.00013225	0.0011193	0.0015569	1.4072e-05	0.00026951	0.00029709	0.00086058	0.00020212	0.00029065	0.0012831	0.00040156	0.00078949	0.00025984	0.0014928	0.0024562	0.034001	0.012117	0.033263	0.0084946	0.0068094	0.00668	0.0010355	0.010118	0.015302	0.0074036	0.18653	0.0066327	0.0031769	0.04835	0.057054	0.073189	0.00076647	0.020967	0.0080564	0.010407	0.029774	0.014125	0.018636	0.03329	0.010087	0.0034206	0.0046279	0.0054884	0.0039093	0.02284	0.035958	0.10737
Q15165	0.0046625	0.0030793	0.00089824	0.0011146	0.0078189	7.4863e-06	0.0013451	0.0018909	0.0032358	0.0019451	0.0023596	0.0074403	0.0034991	0.0064779	0.0054419	0.0048573	0.0097065	0.038122	0.011295	0.06002	0.023251	0.055002	0.022253	0.0040794	0.014421	0.0097164	0.0094358	0.17101	0.011797	0.0078248	0.070192	0.080519	0.11779	0.0055961	0.070231	0.037314	0.027915	0.065253	0.062502	0.085736	0.10619	0.013596	0.00191	0.0042989	0.004819	0.0079089	0.021729	0.017548	0.074076
Q9BX68	0.0055579	0.0041836	0.00051652	0.0015527	0.0029203	7.4989e-06	0.00084317	0.00085067	0.0018229	0.0010632	0.001625	0.0028715	0.0051753	0.0055028	0.00066422	0.0048373	0.0088463	0.061323	0.020014	0.060081	0.022466	0.01605	0.028981	0.0020114	0.021304	0.021113	0.0073239	0.12176	0.011232	0.01044	0.097397	0.095608	0.107	0.0047296	0.065516	0.044387	0.037526	0.10755	0.053079	0.056864	0.1022	0.011757	0.0066296	0.010482	0.013042	0.0075249	0.038517	0.028206	0.16672
P12270	0.0063877	0.0018643	0.0017968	0.00062316	0.00051637	0.00023718	0.0021334	0.0034581	0.00073529	0.0057089	0.0037237	0.0093384	0.032147	0.023376	0.0049112	0.015746	0.03349	0.03024	0.0075265	0.018759	0.017425	0.026311	0.047418	0.0032269	0.0091384	0.0049588	0.0048645	0.016717	0.034353	0.032309	0.0048773	0.10422	0.052562	0.017137	0.11697	0.11756	0.058472	0.10005	0.081377	0.030562	0.088811	0.005217	0.013248	0.021604	0.013186	0.0079757	0.014196	0.01675	0.21956
P18754	0.00096135	0.0037282	0.00071105	0.00086159	0.0089795	0.00015319	0.0012531	0.0021139	0.00078157	0.0042487	0.0041034	0.0097713	0.037424	0.02244	0.0056385	0.004308	0.013532	0.012142	0.0050167	0.065595	0.030559	0.072036	0.080415	0.0024214	0.020453	0.011859	0.0071121	0.065588	0.025549	0.0089257	0.026817	0.04286	0.11398	0.016085	0.16471	0.20336	0.095537	0.13786	0.12317	0.037247	0.14325	0.0016709	0.0046972	0.0027851	0.0039659	0.0046161	0.005609	0.018184	0.050708
Q02790	0.0026271	0.0032745	0.00063922	0.0034632	0.0060954	0.00016945	0.0019601	0.0036044	0.0012873	0.0066441	0.0052261	0.017994	0.033997	0.031217	0.0051956	0.0070736	0.017695	0.018109	0.01225	0.11941	0.053936	0.070547	0.09768	0.0051879	0.031094	0.038324	0.015813	0.15879	0.073776	0.015366	0.034404	0.10644	0.20931	0.014911	0.2113	0.21457	0.10699	0.16406	0.095207	0.023074	0.12771	0.0026255	0.0061502	0.00083022	0.00091675	0.0025578	0.0019119	0.0082025	0.039348
Q15008	0.00041864	0.00018448	4.4484e-05	0.0001555	0.0012262	4.0361e-05	0.00060792	0.0012333	0.00035245	0.0013032	0.00067082	0.0054307	0.0065439	0.006679	0.0022279	0.0042206	0.0091446	0.01287	0.0041602	0.023993	0.012353	0.022328	0.02346	0.00053699	0.0033744	0.0046476	0.0046447	0.086832	0.013048	0.0051353	0.010666	0.049499	0.062971	0.00081259	0.049053	0.040334	0.013719	0.028764	0.036548	0.0077139	0.035537	0.00071563	0.00098058	0.00081668	0.00068135	0.00040898	0.0014337	0.0049411	0.030199
Q6P2Q9	0.002813	0.0063716	0.0010337	0.0028922	0.0046159	5.6409e-05	0.00044268	0.0008532	0.00031683	0.0014994	0.0019316	0.014262	0.019171	0.010855	0.0032716	0.0010446	0.004372	0.01363	0.0080924	0.065132	0.012247	0.056281	0.029415	0.0055399	0.033385	0.021584	0.0074979	0.12836	0.055335	0.014656	0.0094536	0.11328	0.14405	0.014247	0.15435	0.18032	0.14127	0.10724	0.066696	0.054524	0.13584	0.019089	0.013778	0.003997	0.0076252	0.010761	0.015923	0.046644	0.13378
O00515	0.00050775	0.00047036	0.00078247	5.7553e-05	0.001107	7.2021e-05	0.00066869	0.00095827	0.00015408	0.0011499	0.00049338	0.0019071	0.0060446	0.0036269	0.0036473	0.0048431	0.0065451	0.0042495	0.0016103	0.0086769	0.010867	0.013613	0.037185	0.00079295	0.003532	0.0021859	0.0024372	0.033654	0.0032755	0.0065857	0.0067887	0.017117	0.02216	0.0062238	0.023263	0.028462	0.006025	0.030757	0.045186	0.014292	0.033657	0.0017002	0.0070325	0.016233	0.0088754	0.0072296	0.0084978	0.049139	0.090699
P51398	0.0013894	0.00082042	0.0018649	5.0816e-05	0.0010691	0.00019623	0.00064547	0.00076639	0.00025144	0.0010793	0.00046696	0.0026285	0.0062541	0.0039329	0.0030149	0.0040003	0.0038773	0.0050257	0.0037075	0.0038092	0.010106	0.0087921	0.034462	0.00092832	0.0018515	0.0021649	0.0012401	0.012102	0.002726	0.01487	0.0081192	0.027249	0.012051	0.0037391	0.013813	0.019532	0.0031177	0.028657	0.042244	0.018544	0.018529	0.0045482	0.011077	0.026902	0.018871	0.011888	0.012708	0.054121	0.1361
Q8NFW8	0.0054993	0.00023448	0.0019642	0.00015797	0.00019615	0.00058914	0.0024792	0.0052176	0.0006092	0.0049938	0.0013124	0.0080672	0.006962	0.010782	0.019363	0.016837	0.024923	0.014456	0.0052665	0.0043195	0.0087317	0.029311	0.018668	0.0022492	0.0011126	0.00084117	0.0050349	0.02888	0.014273	0.017454	0.00049728	0.059861	0.027057	0.006838	0.028126	0.025556	0.0051954	0.018185	0.045911	0.018086	0.033937	0.0054288	0.0045921	0.017565	0.0049289	0.0057461	0.0049718	0.022414	0.14684
Q9UBQ5	0.0032352	0.00075436	0.00089137	0.00015564	0.00062501	0.00014863	0.0010355	0.0018035	0.00036151	0.0023325	0.00090025	0.0072945	0.01156	0.010412	0.0052369	0.0064429	0.010083	0.014618	0.0083062	0.0097106	0.011742	0.021462	0.03144	0.0013001	0.0029397	0.0033473	0.001905	0.024739	0.01209	0.016887	0.0044132	0.074071	0.038206	0.0036306	0.036004	0.047737	0.011544	0.041352	0.05942	0.023042	0.036529	0.005039	0.0059465	0.010335	0.0068053	0.0038259	0.0056072	0.018541	0.12454
Q96RQ3	1.2745e-05	0.00022583	1.7818e-05	0.00023941	0.0010498	0.00067599	0.00012217	0.0002987	5.7284e-05	8.9986e-05	0.00011897	0.00062069	0.0009746	0.00039045	0.0021055	0.00086269	0.0024149	0.0047315	0.00069409	0.0091889	0.00044428	0.0074333	0.0012155	3.7864e-05	0.001119	0.0018	0.030463	0.19779	0.0044356	0.00086839	0.0070108	0.0045061	0.020251	9.7024e-05	0.015748	0.012083	0.010306	0.0018785	0.0037333	0.0019921	0.059631	0.0010851	0.0012494	0.0031026	0.004438	0.0022065	0.016678	0.078889	0.079732
P19075	0.00047753	3.1456e-05	1.5509e-06	4.5041e-05	0.00074712	0.00056161	0.0029811	0.0057129	0.0012929	0.0026988	0.00094803	0.0012366	0.0045493	0.0056352	0.0067877	0.022629	0.05513	0.083954	0.0076599	0.012724	0.0049399	0.023866	0.0073304	3.6207e-05	0.0016254	0.00043371	0.0068222	0.097721	0.0013601	0.0002995	0.0067885	0.014691	0.049364	0.00043301	0.018948	0.015064	0.0054388	0.010982	0.057214	0.006471	0.055108	6.6766e-05	5.0962e-05	0.003494	0.0013957	1.9652e-05	0.0050036	0.0083284	0.051372
Q9ULC5	0.00010924	0.0013538	0.00030783	0.00079752	0.00051219	0.0072744	0.001017	0.0015642	0.00024042	0.00096826	0.00078016	0.0007626	0.0089452	0.0037291	0.00368	0.0071171	0.012177	0.0049662	0.00093504	0.0062213	0.00068611	0.0028499	0.0023715	2.641e-05	0.00043841	0.0042704	0.073354	0.093349	0.014291	0.0019833	0.020673	0.002288	0.0081039	0.00062671	0.013337	0.02276	0.010032	0.0019241	0.0026194	0.0013557	0.098391	0.0018232	0.0074385	0.024138	0.021376	0.0040221	0.030347	0.070617	0.26074
P30046	0.00093562	0.00063821	3.9141e-05	0.0020225	0.0036771	0.0027225	0.0045887	0.0080981	0.0044397	0.0067838	0.0061612	0.0042329	0.015501	0.018659	0.0060938	0.026652	0.064327	0.072899	0.010669	0.066427	0.020592	0.032914	0.02253	0.00039724	0.0061845	0.0103	0.066861	0.21147	0.02532	0.0034597	0.062871	0.027179	0.10618	0.0013376	0.11007	0.062254	0.043083	0.040231	0.036911	0.0039381	0.1396	0.0001067	0.0003817	0.0013188	0.001057	0.00027941	0.0066842	0.0054053	0.043444
P82933	0.009666	0.0018649	0.00083533	0.0046782	0.0017231	0.0027707	0.0072962	0.013312	0.0066067	0.012119	0.011323	0.016063	0.023763	0.035753	0.015751	0.047992	0.079154	0.088348	0.02262	0.068815	0.032055	0.036187	0.036545	0.0023254	0.0053034	0.016864	0.12094	0.22757	0.074205	0.053735	0.075293	0.13417	0.1127	0.0018808	0.17963	0.086637	0.058006	0.057546	0.031092	0.011368	0.20531	0.0021748	0.0027504	0.0047567	0.003455	0.0036169	0.017221	0.0069315	0.12009
P56192	0.0053077	0.0016107	0.00012652	0.0013866	0.0011079	0.00010675	0.0024823	0.0036267	0.0011275	0.0034575	0.0017421	0.003282	0.012822	0.012208	0.0023574	0.014411	0.031044	0.094048	0.030838	0.060112	0.024664	0.025317	0.044385	0.0011499	0.026564	0.018786	0.0044113	0.1271	0.012659	0.0037136	0.023404	0.08598	0.15638	0.0083176	0.062265	0.078285	0.039276	0.11663	0.1068	0.027811	0.095878	0.0032106	0.0050482	0.0083936	0.0053079	0.00096427	0.011273	0.025653	0.14139
Q16822	0.0062832	0.0011263	0.00070212	0.00050017	0.0010803	0.00026455	0.0084655	0.014009	0.0026181	0.01296	0.0054712	0.011878	0.031533	0.035502	0.019891	0.053086	0.089097	0.0575	0.010826	0.035869	0.028447	0.049842	0.054034	0.0018185	0.006519	0.0045894	0.013125	0.079975	0.02324	0.012867	0.019803	0.08195	0.087948	0.010788	0.08072	0.087484	0.023138	0.058872	0.10702	0.036999	0.13937	0.002218	0.0032628	0.014227	0.0049511	0.0013424	0.0078047	0.0053257	0.12658
Q99714	0.0011356	0.0018542	0.00078423	0.0024731	0.003187	0.00033673	0.0039162	0.0061122	0.0018963	0.0056052	0.0049119	0.014209	0.019447	0.016278	0.0073053	0.020408	0.037991	0.013832	0.0016961	0.057505	0.017691	0.030583	0.026579	0.004072	0.011686	0.013932	0.048132	0.20815	0.066255	0.013352	0.030064	0.058945	0.079903	0.0083519	0.1177	0.074295	0.04992	0.028213	0.022666	0.014483	0.11896	0.0044456	0.0086694	0.0077087	0.0048272	0.0044009	0.013131	0.010743	0.087588
Q9Y230	0.0052592	0.015688	0.0026138	0.011656	0.017739	0.00014154	0.00088116	0.0011822	0.0017519	0.0016106	0.0044679	0.01163	0.011612	0.0077817	0.0041554	0.0019391	0.0035809	0.026003	0.020495	0.17203	0.040523	0.053883	0.071169	0.0098297	0.071124	0.072369	0.053916	0.43604	0.04918	0.040214	0.12361	0.1239	0.22629	0.01311	0.2193	0.15941	0.16541	0.1798	0.054653	0.062211	0.24606	0.022278	0.022483	0.0056196	0.014389	0.042207	0.058679	0.14687	0.11316
P48729	0.010493	0.0043067	0.00050448	0.0024644	0.0024366	3.4265e-05	0.00073446	0.0014215	0.00096781	0.0013207	0.0016549	0.0036448	0.0049863	0.0071588	0.0069392	0.0048594	0.007705	0.072129	0.045259	0.094505	0.028783	0.042035	0.051298	0.0013339	0.020327	0.025793	0.029788	0.3193	0.011964	0.026129	0.092559	0.12608	0.19372	0.0029198	0.10939	0.092659	0.055015	0.1463	0.07514	0.058187	0.25795	0.0079706	0.0034317	0.0038688	0.0057365	0.01136	0.033354	0.08242	0.14485
Q9Y5L4	0.0026951	0.0024641	0.00017733	0.0013097	0.0019336	7.6009e-06	0.00078698	0.0013973	0.00053911	0.00091064	0.00078187	0.0029343	0.0034524	0.0041716	0.0051582	0.0046242	0.008729	0.033365	0.011996	0.06923	0.01221	0.032686	0.019162	0.00093526	0.015357	0.015704	0.02001	0.32676	0.01174	0.0038434	0.052257	0.059761	0.14118	0.0035912	0.053614	0.054245	0.030257	0.051304	0.043361	0.046991	0.18519	0.0085868	0.0029664	0.00458	0.0043819	0.0041011	0.02253	0.047916	0.12737
O60547	0.0017756	0.0004824	7.6559e-06	0.00042984	0.0012597	3.1565e-05	0.00086626	0.0015016	0.00040703	0.00064914	0.00029358	0.0038857	0.0036529	0.0031441	0.0019346	0.0048982	0.0093838	0.073139	0.028037	0.037494	0.0094277	0.018608	0.018942	0.00034503	0.012638	0.010256	0.0030567	0.22321	0.0045285	0.0039966	0.014405	0.097446	0.12249	0.0002774	0.027582	0.032097	0.015599	0.037724	0.060419	0.017672	0.050651	0.0030975	0.0018473	0.0024325	0.0032504	0.00032401	0.0097824	0.034452	0.071408
P62857	0.0052859	0.0013849	0.00060081	0.002207	0.00023322	8.5414e-05	0.0012132	0.0024186	0.00055331	0.001412	0.0013479	0.0053203	0.0038092	0.0048368	0.0065773	0.012209	0.018747	0.032903	0.0074182	0.037077	0.0068809	0.014652	0.010409	0.0018953	0.0071966	0.010813	0.056759	0.29237	0.037612	0.027629	0.020852	0.10887	0.078286	0.0026328	0.076413	0.039401	0.034729	0.025549	0.01188	0.020001	0.16535	0.011996	0.0085063	0.012591	0.0082546	0.010522	0.039539	0.050583	0.23993
Q9Y3L5	0.0040556	0.0019406	0.00019871	0.0038637	0.0070878	0.00036561	0.0045113	0.0089887	0.0021945	0.0068963	0.004902	0.033284	0.026784	0.022642	0.012109	0.014206	0.037578	0.074808	0.02432	0.10516	0.027645	0.093601	0.047712	0.0063082	0.04133	0.021677	0.015144	0.31964	0.058991	0.01795	0.0082337	0.19537	0.25183	0.0054763	0.18263	0.15645	0.11609	0.08578	0.10992	0.028916	0.11467	0.0054282	0.004596	0.0012704	0.0017909	0.0011388	0.0065845	0.018966	0.042281
O95571	0.01398	0.00042877	0.0005003	0.00054021	0.00044395	4.5632e-05	0.0064763	0.012956	0.0023474	0.0071006	0.0023714	0.0076205	0.0044795	0.011611	0.032279	0.044163	0.073934	0.11093	0.020356	0.032545	0.016804	0.064306	0.021177	0.0026628	0.0085408	0.0021357	0.011875	0.21471	0.0096089	0.0092549	0.0063871	0.11724	0.12797	0.0085515	0.049384	0.031737	0.012862	0.039275	0.098056	0.061711	0.13862	0.0070499	0.0013634	0.013906	0.0032296	0.0025091	0.016185	0.023928	0.14936
O95232	0.040958	0.0081282	0.0023686	0.014604	0.007004	0.00020779	0.0083287	0.013616	0.0054408	0.008269	0.0048313	0.048726	0.011199	0.018351	0.022545	0.020106	0.028935	0.16034	0.107	0.1509	0.048213	0.099611	0.056097	0.023986	0.090165	0.066988	0.016379	0.57502	0.067723	0.046352	0.020476	0.45887	0.39867	0.012553	0.12146	0.10153	0.083845	0.12923	0.13193	0.11286	0.12799	0.069694	0.021773	0.0096329	0.0089214	0.010517	0.031701	0.085268	0.15412
P49585	0.011115	0.0010782	0.0007045	0.0038173	0.001841	0.00054103	0.0037802	0.0079165	0.0011683	0.0058122	0.0017465	0.026822	0.0096231	0.013731	0.014597	0.011231	0.019909	0.057732	0.043534	0.055266	0.02514	0.064303	0.040085	0.0085809	0.030599	0.024347	0.0053962	0.26109	0.046375	0.017656	0.001041	0.22649	0.21807	0.0072652	0.070151	0.075148	0.037573	0.065368	0.093334	0.024356	0.040176	0.015562	0.0097013	0.0034723	0.0017909	0.002147	0.0033084	0.043709	0.077823
P17931	0.0085136	0.00073072	0.0021484	0.00013994	0.00031318	0.00047694	0.0060554	0.0086634	0.0036352	0.0089076	0.0040112	0.0010141	0.0071926	0.013833	0.015202	0.048127	0.086154	0.060463	0.0048542	0.0070419	0.012071	0.026012	0.014679	0.0010729	0.0016664	0.00033916	0.0084272	0.013851	0.0035787	0.0027905	0.014805	0.015401	0.02323	0.024311	0.025925	0.017699	0.0055748	0.037087	0.073723	0.048938	0.10586	0.0031476	0.0019286	0.056644	0.014614	0.0067196	0.026724	0.014863	0.28863
P80365	0.0050116	0.00047907	0.0016838	0.00053303	0.0032429	0.013512	0.01273	0.020967	0.014458	0.021613	0.01209	0.0040512	0.013396	0.029078	0.029443	0.054659	0.13039	0.080584	0.0068515	0.0073361	0.011908	0.061556	0.0069111	0.0012677	0.00063042	0.00021145	0.02358	0.013224	0.0097007	0.0012866	0.010308	0.0074295	0.025279	0.011273	0.041216	0.019318	0.0099671	0.018246	0.068818	0.017069	0.066506	0.00074511	0.00016185	0.016913	0.0045574	0.001644	0.0084589	0.0035323	0.1107
Q8NFV4	0.0073653	0.00032857	0.002785	0.00050736	0.00062251	0.0033801	0.0057448	0.012417	0.0026046	0.017963	0.0088546	0.008359	0.025229	0.036459	0.028679	0.039547	0.083427	0.033532	0.0064548	0.012423	0.026594	0.062332	0.050067	0.0032187	0.0022427	0.0009155	0.018078	0.014964	0.02877	0.025858	0.0016648	0.044516	0.044762	0.022057	0.13266	0.086075	0.032503	0.075143	0.092629	0.012084	0.087889	0.00049317	0.0020904	0.01166	0.0024145	0.0062555	0.003411	0.010031	0.10634
Q96I99	0.0058425	0.00064362	0.00296	0.00012745	9.3956e-06	0.00080396	0.0028179	0.0043082	0.00048983	0.0040023	0.0016243	0.0015939	0.0099419	0.0090806	0.010115	0.034382	0.04689	0.01956	0.0020044	0.0016165	0.003442	0.0054505	0.010632	0.00069248	0.00047774	0.00043746	0.015116	0.010787	0.01026	0.019899	0.003284	0.027783	0.0060872	0.010409	0.021115	0.019576	0.0055163	0.014041	0.021057	0.017517	0.082471	0.0058837	0.013332	0.093175	0.034506	0.015008	0.040751	0.041877	0.47761
Q99459	0.0035504	0.0275	0.0078713	0.0061198	0.018124	0.0018652	0.0048334	0.0049889	0.0047324	0.011781	0.015259	0.029889	0.10281	0.056632	0.0048492	0.0094789	0.025752	0.0096095	0.003377	0.065399	0.02513	0.055726	0.046048	0.010523	0.026314	0.031626	0.019585	0.02579	0.12237	0.016212	0.070694	0.059255	0.071501	0.045205	0.18202	0.25236	0.16525	0.10816	0.072795	0.08219	0.17207	0.028369	0.035681	0.027142	0.038276	0.01785	0.030519	0.010004	0.2329
Q9Y5X3	0.0024706	0.00415	0.0056711	0.00090024	0.005076	0.002494	0.0057469	0.0078468	0.0026498	0.01558	0.010001	0.02291	0.075932	0.054064	0.011567	0.021773	0.039062	0.0053882	0.0021518	0.019476	0.030278	0.043102	0.071722	0.0051375	0.0045418	0.00703	0.011088	0.0075854	0.061721	0.026	0.017071	0.042859	0.030408	0.024061	0.11284	0.14305	0.042456	0.063648	0.074351	0.024367	0.069273	0.00403	0.01563	0.020196	0.013161	0.0082642	0.0052047	0.0046501	0.11766
Q9Y2V2	0.03226	0.04288	0.036391	0.013393	0.016538	0.001855	0.010049	0.01017	0.013081	0.033355	0.043384	0.033883	0.13772	0.11187	0.0096537	0.031234	0.057737	0.030703	0.015872	0.11341	0.12351	0.080478	0.20666	0.036542	0.056489	0.05613	0.030419	0.011735	0.16051	0.11059	0.14193	0.15255	0.1196	0.15553	0.41427	0.37889	0.25626	0.44341	0.16984	0.14326	0.27012	0.031173	0.068831	0.060408	0.052741	0.085139	0.051517	0.018295	0.33433
Q9UBB4	0.0092313	0.014129	0.01054	0.0082374	0.0070484	0.0042849	0.007187	0.010177	0.0047231	0.023141	0.02524	0.028139	0.11579	0.085792	0.013235	0.030898	0.055201	0.016474	0.0088119	0.086534	0.070186	0.05558	0.14961	0.011003	0.020746	0.038876	0.073752	0.04614	0.15577	0.092907	0.07612	0.10043	0.09504	0.044756	0.34997	0.32896	0.18147	0.21197	0.080316	0.02909	0.25093	0.0055801	0.033285	0.020047	0.017711	0.029077	0.01893	0.016146	0.18796
P46379	0.013022	0.01236	0.0054366	0.0030825	0.0012303	0.0006479	0.0074521	0.0082531	0.0020805	0.0078148	0.0059713	0.0086968	0.042256	0.025572	0.01067	0.044079	0.052893	0.045205	0.012849	0.039185	0.02008	0.014761	0.0541	0.0034605	0.016564	0.020927	0.036584	0.096702	0.036226	0.040713	0.069417	0.093299	0.055973	0.022535	0.072157	0.10411	0.045571	0.073952	0.056721	0.06807	0.24306	0.024817	0.049772	0.10608	0.075303	0.026396	0.098189	0.076143	0.52432
Q13155	0.0051623	0.0093637	0.0038361	0.0039304	0.00060333	0.0039605	0.0029933	0.0040507	0.00054989	0.0056839	0.0041446	0.008845	0.05512	0.027475	0.0056575	0.016071	0.025351	0.013284	0.0075202	0.023299	0.0088444	0.010208	0.03194	0.0018554	0.0083055	0.023841	0.040047	0.047492	0.077357	0.030236	0.020155	0.058863	0.038082	0.014774	0.079244	0.14958	0.067991	0.052069	0.027054	0.017049	0.1642	0.015224	0.04958	0.053645	0.045268	0.015806	0.038525	0.061362	0.47174
P31937	0.002438	0.0022144	0.0046735	0.00069329	0.0011871	0.0028774	0.0076831	0.0063284	0.0049829	0.0074537	0.0071427	0.0055806	0.029505	0.015267	0.0012376	0.048669	0.070725	0.027204	0.0010194	0.0038032	0.0091024	0.0020585	0.016233	0.0033707	0.0030483	0.002562	0.013117	0.003488	0.024325	0.026094	0.022752	0.031487	0.00342	0.012005	0.037468	0.016435	0.014735	0.017044	0.016327	0.011266	0.024188	0.0068567	0.035942	0.12859	0.08077	0.015513	0.068645	0.014176	0.35294
Q9HB07	0.0020883	0.0010037	0.001643	0.0012229	0.0016597	0.004878	0.0037448	0.0045461	0.0030178	0.0079122	0.0072041	0.0043573	0.029873	0.021683	0.0016623	0.025483	0.044321	0.02998	0.0062921	0.016553	0.028858	0.0079936	0.057665	0.0017941	0.0048254	0.0081652	0.020807	0.012702	0.027705	0.030552	0.025803	0.035144	0.023786	0.0072003	0.10092	0.056689	0.033527	0.0749	0.036542	0.0024218	0.037137	0.00037906	0.011206	0.020121	0.013113	0.0066505	0.012362	0.014064	0.12134
Q9BQ61	0.00026521	0.001146	0.003803	0.00215	0.0016731	0.0018043	0.00059023	0.00071129	0.0015939	0.00076866	0.003046	0.0021237	0.0015097	0.0010951	0.001353	0.0048067	0.009678	0.0018925	7.374e-06	0.0068449	0.0015551	0.0032785	0.00092007	0.0040318	0.0014302	0.0020832	0.11048	0.078628	0.043143	0.021189	0.019605	0.0089766	0.0038289	0.0048602	0.069919	0.0061554	0.02929	0.0028695	0.00016873	0.0032606	0.052595	0.0084658	0.014365	0.031861	0.024995	0.053666	0.081722	0.054016	0.20522
Q9Y237	6.3972e-05	0.0012615	0.00040272	0.0027731	0.020276	0.0037067	0.0021885	0.0030981	0.0076064	0.005019	0.0095936	0.013292	0.016296	0.016774	0.0018121	0.0062596	0.019068	0.0072651	0.00074116	0.054037	0.021112	0.031864	0.014488	0.002518	0.0034939	0.012025	0.071574	0.10658	0.068077	0.006714	0.09208	0.016347	0.04661	0.0011353	0.15064	0.046865	0.05257	0.019434	0.0088146	0.0022294	0.046328	0.00040725	0.00081876	0.00028212	0.00088538	0.0016651	0.0034173	0.00060446	0.008999
Q9Y2Z0	4.1341e-05	0.0059869	0.0012829	0.0012859	0.0072386	0.0058928	0.0011381	0.0008237	0.0021243	0.0015813	0.00421	0.0026279	0.027541	0.0086642	0.00023914	0.0039732	0.011203	0.0036795	0.00016041	0.0095426	0.0022414	0.0031858	0.00374	0.00048646	0.0018019	0.0063619	0.037174	0.011749	0.031014	0.0033674	0.073341	0.0029139	0.0042079	0.0027586	0.044741	0.037836	0.040907	0.0087546	0.0041201	0.0054297	0.057181	0.0038814	0.013897	0.029127	0.047458	0.0087533	0.048407	0.014654	0.20851
P07919	6.1827e-05	0.00094949	0.00064205	7.1609e-05	0.00051304	0.00064513	7.6825e-05	0.00016707	1.6737e-05	0.00024018	0.00016522	9.2576e-05	0.0022313	0.00092802	0.0037054	0.00046833	0.002164	0.00066413	8.4595e-05	0.002418	0.00028821	0.012662	0.0014472	8.1726e-05	0.00078909	0.00035414	0.0082223	0.021307	0.0025532	6.7148e-05	0.0017084	0.00023344	0.0073882	0.009986	0.010487	0.024444	0.010802	0.0068771	0.013126	0.013244	0.084993	0.0032107	0.0032425	0.020597	0.013026	0.010853	0.018786	0.10585	0.234
O15347	2.8878e-06	0.00035574	5.9507e-05	0.0003609	0.00097416	0.0027586	0.00035082	0.00033274	0.00036354	0.00040626	0.0004562	0.0013084	0.0062875	0.0021497	2.3465e-05	0.0016065	0.0054068	0.0027027	0.00015679	0.0030975	0.00056283	0.00084625	0.00064343	0.00012661	0.000714	0.0035621	0.0084617	0.015169	0.020138	0.00030863	0.0068939	0.0035545	0.0043562	0.00035423	0.010531	0.0086142	0.0092246	0.0013923	0.0013827	0.00030685	0.0054415	0.0014241	0.0056183	0.0082055	0.0098423	0.00047822	0.0072843	0.0063533	0.1102
P30038	9.7778e-06	0.00057158	0.00033045	0.00047482	0.00017191	0.0025887	7.4939e-05	0.00010429	2.1094e-05	0.00014773	0.00016676	0.00037738	0.003272	0.00085391	0.00018392	0.00056627	0.001755	0.0003376	4.6863e-05	0.0019121	0.00016104	0.00078616	0.00054981	0.00011578	0.00055152	0.0030504	0.01999	0.024518	0.0203	0.00077742	0.0021014	0.0015475	0.0031026	0.0016381	0.010941	0.013245	0.011703	0.0015959	0.00056952	0.00043066	0.02095	0.0031671	0.012592	0.017376	0.015066	0.005634	0.015163	0.054311	0.2343
O60716	0.0023782	0.00022819	7.5407e-05	0.00012644	4.5775e-05	2.6875e-05	0.00057752	0.001369	0.00010128	0.0009248	0.00033657	0.0010018	0.0033462	0.0039321	0.0050529	0.0089249	0.015996	0.033023	0.0083285	0.015519	0.0059064	0.01383	0.016202	0.00014579	0.0026548	0.0023827	0.0095961	0.10861	0.0050676	0.0062882	0.007229	0.045362	0.056057	0.0018103	0.032957	0.034909	0.011143	0.03338	0.038028	0.014429	0.11053	0.0014462	0.0017298	0.0079328	0.0034613	0.0018871	0.011325	0.036455	0.16869
P00367	0.00068948	0.000318	0.00010111	0.00031318	1.6655e-05	0.0002616	0.0001396	0.00023939	5.2683e-05	0.00012351	0.00018981	0.00045075	0.0017839	0.0006988	0.00032284	0.0030054	0.0072605	0.021539	0.001951	0.0038331	0.0003681	0.0011217	0.0011466	0.00013589	0.0016605	0.0016866	0.016031	0.058136	0.0095971	0.0085801	0.0028363	0.030629	0.011856	0.00053934	0.024604	0.012804	0.019608	0.0080266	0.0035229	0.0035159	0.052531	0.0042356	0.0079623	0.022827	0.020119	0.0061456	0.049694	0.069701	0.33346
P40306	0.002758	0.0016873	0.0019964	0.0010903	1.7085e-06	0.00078361	0.00016484	0.00023586	1.5173e-05	0.00017091	8.0482e-05	0.0004263	0.0012096	0.00058376	0.00096408	0.0017852	0.0027319	0.0048703	0.0017719	0.0014839	0.00013272	0.00075522	0.00044038	0.00068583	0.0019926	0.004413	0.01263	0.040006	0.018449	0.0046389	0.00054951	0.020974	0.0075703	0.0068941	0.0055536	0.0096457	0.0093706	0.0046371	0.0018687	0.0095043	0.042531	0.03849	0.039964	0.082731	0.048758	0.024904	0.064004	0.17746	0.70024
Q99417	0.00019293	0.00014415	8.4489e-05	0.00023059	0.0020873	0.00020186	0.00047841	0.00095418	0.0002299	0.00085502	0.00043236	0.0024065	0.0028418	0.0017577	0.001778	0.0015744	0.0080381	0.014612	0.0019208	0.012182	0.0037045	0.029853	0.0073192	0.0015185	0.011937	0.0014732	0.00070234	0.056533	0.0059001	0.00036631	0.00010721	0.017651	0.054135	0.0073269	0.033891	0.027234	0.025141	0.023917	0.05104	0.0089904	0.014968	0.001735	0.002143	0.0035572	0.0021775	0.0013319	0.0039263	0.039194	0.045694
P14927	0.00028355	1.6752e-05	0.00061612	0.00021328	0.00089768	0.0056372	0.00033787	0.00043148	0.0020074	0.00034608	0.00047008	0.00028077	3.2028e-05	0.00017518	0.0004645	0.0021244	0.0039722	0.011725	0.0012752	0.00045711	0.0012938	0.0014749	0.00031595	0.00052488	9.1301e-05	0.00027126	0.01285	0.017026	0.0019087	0.0029997	0.0037224	0.0036908	0.0017993	0.0001436	0.0049018	4.2474e-05	0.00060031	0.001153	0.001072	0.00031589	0.00089416	0.0012373	0.0010085	0.010741	0.0066677	0.0079331	0.016043	0.037881	0.074556
Q8NBX0	0.0029081	0.0086795	0.029306	0.0022402	0.00074816	0.013514	0.00013619	3.9434e-05	0.00070936	0.00011036	0.00055122	6.0186e-05	0.00032689	8.0287e-05	0.00025516	0.00041414	0.00026136	0.0010412	0.00054726	5.0636e-05	0.00014807	5.6668e-05	0.00016701	0.0026738	0.00067757	0.0026479	0.024343	0.0016052	0.0053279	0.014247	0.011546	0.0013067	2.7803e-05	0.012706	0.0019001	0.00047191	0.0039946	0.003306	0.00017899	0.011539	0.0113	0.077299	0.093955	0.27631	0.24559	0.22649	0.2677	0.45514	0.88781
P30049	0.0003968	0.0025427	0.0027057	0.0002394	8.3316e-05	0.0018715	1.0786e-05	2.0431e-06	3.2387e-05	1.2804e-06	1.2752e-05	1.847e-07	4.8692e-05	2.1398e-06	3.4134e-05	0.00011002	0.00010438	0.0021814	0.00044883	5.587e-05	4.3519e-06	1.0797e-05	1.6512e-05	5.913e-05	0.00033959	0.00094668	0.0084783	0.0072445	0.00035979	0.00090165	0.008689	0.00037316	0.00011278	0.0019261	0.00019893	0.00024718	0.0012467	0.001117	0.00026542	0.0082603	0.017646	0.031121	0.032338	0.15869	0.1481	0.06511	0.19293	0.37729	0.76581
Q16698	0.0020852	0.0029635	0.0098338	0.00045262	2.9077e-05	0.0022208	1.0449e-05	6.066e-06	3.5698e-05	1.0293e-05	4.5538e-05	3.8968e-07	1.7358e-05	9.8683e-06	0.00082032	0.00018584	0.0001012	0.00081933	0.00050799	8.7147e-05	4.5629e-05	0.00014241	0.00011602	0.00025792	0.0001427	0.0008456	0.027425	0.010886	0.0010072	0.0054765	0.0090323	0.00058937	0.00019845	0.0062152	0.0010669	0.00057088	0.0014124	0.0030068	0.00026039	0.012997	0.046033	0.038195	0.031914	0.16148	0.11693	0.14867	0.1876	0.46974	0.82988
P30626	0.0022524	0.00023977	0.0011947	8.0177e-06	0.002364	0.001899	0.0011458	0.001595	0.0023781	0.0023089	0.0014028	0.00050175	0.0026417	0.003692	0.0048786	0.0054887	0.015551	0.042786	0.0067721	0.00081988	0.0054797	0.024999	0.0084906	0.00043245	0.00062752	1.5345e-05	0.00027186	0.00054558	9.8731e-05	0.0016076	0.0025771	0.0054983	0.0075204	0.0051821	0.011537	0.0068706	0.0031554	0.03172	0.093022	0.026152	0.013525	0.0010129	0.00039502	0.022646	0.013486	0.0061298	0.014646	0.032912	0.11135
O75351	0.014923	0.0019177	0.013959	0.00044483	0.00067011	0.0070254	0.0067139	0.0071204	0.0065903	0.012406	0.0085886	0.0036129	0.019416	0.020552	0.0061788	0.040069	0.062496	0.044608	0.0066412	0.0010306	0.014055	0.0090435	0.022185	0.0047765	0.0012975	0.00058302	0.0048265	6.6738e-05	0.011082	0.035631	0.0062016	0.032589	0.0036514	0.027799	0.035573	0.017154	0.010094	0.050036	0.053216	0.025775	0.022368	0.0084015	0.019493	0.13406	0.064669	0.033893	0.048186	0.027566	0.42134
O94760	0.0042304	0.00070876	0.0096257	0.00035542	0.003455	0.0041576	0.0076781	0.0073768	0.014002	0.013122	0.010185	0.0033103	0.008288	0.015105	0.0040746	0.037868	0.059548	0.020959	0.0012921	0.0026476	0.025355	0.012036	0.019117	0.0064373	0.00099829	0.00060365	0.006687	0.0005182	0.0096543	0.010451	0.022605	0.010411	0.0039896	0.0243	0.030052	0.004433	0.0031759	0.027278	0.03186	0.015059	0.0077933	0.0029082	0.0059747	0.061083	0.02096	0.01813	0.018087	0.0042829	0.1366
P05091	0.00015349	0.0042144	0.012321	0.00021911	0.0021056	0.011823	0.00056436	0.00043358	0.0006759	0.0017516	0.0020076	0.00045722	0.011924	0.0048562	0.001881	0.0018222	0.0039461	4.2746e-05	5.2929e-06	0.00016039	0.00078913	0.0031732	0.0021729	0.00071249	8.1018e-05	0.0004406	0.012113	2.2604e-05	0.0098943	0.0015485	0.0087065	3.1524e-05	6.7638e-05	0.021754	0.0081024	0.013632	0.0059261	0.0043643	0.0044307	0.0086366	0.023437	0.0083251	0.021838	0.10044	0.072348	0.04595	0.036986	0.058049	0.38628
Q9H2U2	0.0069544	0.0041585	0.027923	0.0011454	0.002363	0.010218	0.0011442	0.0016149	0.0030551	0.0061039	0.0070638	0.00044173	0.004998	0.0089297	0.013826	0.0053888	0.01112	0.0030809	0.0012299	0.0027892	0.012242	0.02684	0.016397	0.0043664	0.00084439	0.00084733	0.032126	0.00096107	0.0098925	0.01259	0.015489	0.001239	0.0047735	0.065875	0.054853	0.027071	0.018002	0.065298	0.027924	0.027703	0.087576	0.0070076	0.009374	0.068259	0.030402	0.11685	0.040514	0.1099	0.33413
Q9NUB1	0.0038866	0.012603	0.029312	0.0037713	0.0037996	0.020174	0.0029345	0.0019461	0.0081252	0.0057189	0.010613	0.0014472	0.013986	0.010274	0.0014157	0.0099678	0.018988	0.0044889	0.00033837	0.0017869	0.0038205	0.0029521	0.0024255	0.0058496	0.0012272	0.0037149	0.043546	0.00030346	0.037258	0.010598	0.046424	0.0021506	0.00067175	0.042009	0.030663	0.012496	0.023284	0.016679	0.0036947	0.019902	0.041264	0.03066	0.045128	0.17542	0.13022	0.097279	0.12422	0.053021	0.61309
O15372	0.013492	0.0058976	0.031813	0.0016552	0.001257	0.0094195	0.0022047	0.0024077	0.0029539	0.010397	0.0089106	0.0032377	0.02423	0.024407	0.00519	0.010281	0.016475	0.0057086	0.0043509	0.002938	0.023784	0.013635	0.045723	0.0084937	0.0024565	0.0042775	0.0093392	3.1801e-05	0.032022	0.044618	0.0093939	0.019334	0.0061014	0.067927	0.071435	0.056932	0.027771	0.1156	0.044804	0.023357	0.036395	0.012254	0.037788	0.094049	0.049025	0.085177	0.027543	0.054455	0.41204
Q01082	0.0016537	0.0022756	0.0054225	4.0227e-05	0.00043385	0.0014943	0.00033399	0.00024	0.00051212	0.0009695	0.00090435	6.5995e-05	0.0052581	0.0032181	0.00079995	0.0027252	0.0051696	0.0046737	0.00094153	0.0003737	0.0025799	0.0026947	0.0070551	0.00029327	0.00033817	0.00033825	0.001671	2.0547e-05	0.0011101	0.0026796	0.013446	0.0012907	0.00088344	0.016294	0.0075138	0.011195	0.0039493	0.02952	0.024201	0.024061	0.030259	0.0056928	0.010991	0.094514	0.061287	0.031349	0.045247	0.06134	0.43811
Q9NR28	0.0015766	0.0067394	0.0039746	0.0041643	0.065792	0.0056819	0.0059113	0.0059672	0.017687	0.0087732	0.0081789	0.015672	0.009915	0.012948	0.0058092	0.0034086	0.012039	0.022001	0.0086122	0.042715	0.027546	0.097562	0.014441	0.013794	0.025839	0.013673	0.0026255	0.048537	0.017031	0.00017264	0.032718	0.013122	0.084905	0.024218	0.036177	0.027016	0.027353	0.04189	0.093585	0.05529	0.012064	0.017771	0.003631	0.0063231	0.0078532	0.0057306	0.0075299	0.015571	0.025702
O43242	0.00089447	0.015337	0.013606	0.0042813	0.016455	0.00955	0.00091898	0.00064482	0.0011229	0.00087792	0.00089989	0.0065433	0.0054244	0.00173	0.0028847	0.00024164	0.00030473	0.00046558	0.0018059	0.0050164	0.0015628	0.011687	0.0024697	0.0073727	0.0096591	0.016084	0.006119	0.033229	0.019525	0.0016207	0.0072707	0.0057787	0.0098132	0.017117	0.004163	0.01405	0.0122	0.005146	0.0097798	0.033247	0.010728	0.092145	0.065696	0.072726	0.088249	0.055398	0.056176	0.23768	0.30093
P39748	0.0038693	0.011866	0.012155	0.006029	0.019521	0.012257	0.0090629	0.008421	0.011741	0.011842	0.0085181	0.023615	0.024728	0.021655	0.0059891	0.010199	0.020721	0.0099736	0.0041085	0.013928	0.010673	0.032235	0.0063814	0.015333	0.011048	0.015743	0.0072475	0.016423	0.061666	0.0020523	0.016275	0.023566	0.026052	0.030957	0.020954	0.026988	0.02119	0.013682	0.031336	0.043186	0.012937	0.056992	0.031179	0.050815	0.041282	0.013639	0.021782	0.01758	0.20628
Q02880	0.012477	0.019214	0.024325	0.0079055	0.030106	0.0063867	0.014937	0.017581	0.015156	0.030478	0.022887	0.068428	0.073159	0.065957	0.023097	0.019276	0.043957	0.014791	0.0067982	0.038284	0.037043	0.12466	0.040849	0.042481	0.029448	0.017817	0.0065888	0.016056	0.12452	0.017205	0.011155	0.089566	0.076289	0.090284	0.12433	0.1391	0.090053	0.077642	0.12199	0.11591	0.050111	0.062516	0.036877	0.039509	0.030305	0.026041	0.016017	0.011329	0.16449
Q9HC35	0.00068619	0.0020621	0.0023487	0.0010703	0.0056977	0.0031999	0.0009551	0.0010471	0.0017972	0.0012935	0.00081977	0.0026565	0.0017474	0.0019498	0.0020881	0.00095838	0.0033226	0.0047412	0.0015143	0.004179	0.0016213	0.017771	0.0006788	0.0030138	0.0037803	0.0030421	0.0022307	0.020276	0.0102	6.1801e-05	0.0026253	0.0045055	0.015573	0.010913	0.0051158	0.0058336	0.0063966	0.0048605	0.015089	0.020825	0.0070839	0.024608	0.0068613	0.020665	0.015171	0.0076199	0.013518	0.041987	0.15104
P05067	0.0012253	0.0013644	0.002222	0.0023031	0.0037052	0.0074781	0.0011004	0.0011711	0.0011656	0.0021061	0.00064635	0.001385	0.0023145	0.0025714	0.00082792	0.0010003	0.0029783	0.0074319	0.0081103	0.0068543	0.0070295	0.012317	0.0065498	0.0036985	0.012428	0.012883	0.00049733	0.014609	0.0098464	3.251e-05	0.00067742	0.0052102	0.033699	0.023205	0.0046932	0.010095	0.0065028	0.025652	0.034041	0.0058376	0.0013525	0.012225	0.014549	0.018531	0.0091001	0.0050067	0.0033336	0.077417	0.12505
Q9NR19	0.01708	0.0054244	0.013595	0.008787	0.002837	0.0032172	0.0036032	0.0031551	0.0052909	0.004116	0.0018606	0.005198	0.0011828	0.0038407	0.0023397	0.0063773	0.0060572	0.019022	0.02091	0.01597	0.019598	0.0092616	0.010258	0.018536	0.019534	0.036886	0.0050038	0.059083	0.02958	0.0044688	0.013333	0.053808	0.049393	0.0344	0.0068523	0.004285	0.0043563	0.033438	0.01937	0.031407	0.0050044	0.082187	0.048094	0.06429	0.028754	0.033499	0.026684	0.095142	0.30966
P26639	0.00033244	0.0056645	0.0064817	0.00088902	0.010629	0.0018417	0.00028869	0.00022058	0.00092885	0.0011356	0.0015589	0.0046383	0.0094992	0.0054198	0.00082674	0.00024737	0.00048757	0.00016915	0.00059699	0.0075563	0.0084488	0.013423	0.014267	0.0035725	0.0030796	0.0090489	0.0040026	0.0051441	0.020888	0.0044779	0.024265	0.0065064	0.0094825	0.011474	0.025766	0.031721	0.015553	0.02588	0.015543	0.018515	0.013332	0.01478	0.017622	0.015274	0.020441	0.025522	0.010504	0.032447	0.10936
Q01130	0.0059084	0.022733	0.020788	0.0081209	0.027982	0.002231	0.0023389	0.0020646	0.0077084	0.0087712	0.013721	0.024614	0.036339	0.028759	0.0023034	0.0019486	0.0072533	0.0048559	0.0031725	0.04212	0.031227	0.06242	0.031479	0.032022	0.032358	0.026883	0.0058092	0.007149	0.10399	0.0141	0.032639	0.051423	0.05759	0.082136	0.15381	0.12596	0.13008	0.13247	0.062732	0.088755	0.045412	0.052969	0.037228	0.023991	0.029731	0.050261	0.023355	0.017201	0.17001
Q14247	0.0023867	0.010096	0.0090934	0.011577	0.0042563	0.01055	0.0001624	8.8943e-05	0.00081058	0.00043927	0.001425	0.0077084	0.0072887	0.0024594	1.8109e-05	9.0797e-05	0.00013647	0.0025137	0.0074645	0.0091535	0.0043936	0.001208	0.006395	0.0094438	0.013394	0.051367	0.013816	0.01842	0.085342	0.039592	0.01003	0.061821	0.014322	0.0049459	0.042517	0.028485	0.05896	0.033426	0.0020289	0.0033723	0.0042756	0.054784	0.0979	0.031665	0.061284	0.058725	0.047151	0.14296	0.31649
Q63HN8	0.00027178	0.0095601	0.001997	0.0068753	0.013613	0.0036417	0.00014007	6.5747e-05	0.00081853	0.00018589	0.00098845	0.0076477	0.0076404	0.0014096	5.3685e-06	2.3962e-05	0.00016699	0.0039571	0.0033405	0.017254	0.0021321	0.0038291	0.0027803	0.0059074	0.024484	0.036107	0.0053413	0.040286	0.049772	0.0063745	0.012034	0.0365	0.025354	0.0032528	0.039236	0.032617	0.080147	0.022165	0.0051395	0.0081498	0.006309	0.041383	0.050666	0.014857	0.047308	0.021031	0.045146	0.097637	0.17456
P55010	0.00099091	0.0053054	0.0027444	0.0027787	0.019063	0.00055463	0.00050996	0.00034693	0.0035059	0.0010778	0.0038541	0.0127	0.010378	0.0051837	8.9687e-05	0.00068553	0.0020696	0.011037	0.0037704	0.02969	0.017582	0.014257	0.020782	0.010138	0.020207	0.018232	0.0048511	0.026718	0.036154	0.026704	0.041089	0.073338	0.03691	0.0048765	0.10806	0.040076	0.073075	0.067442	0.022558	0.021218	0.012819	0.015166	0.018508	0.0077904	0.021466	0.022108	0.029888	0.022267	0.067354
P55209	0.0024677	0.012214	0.017161	0.0057983	0.016485	0.00025897	0.00026426	0.0002682	0.0016221	0.0017444	0.0041927	0.0064561	0.0050144	0.0057069	0.0026043	0.00026525	0.00050618	0.00026288	0.0010106	0.053855	0.033432	0.042658	0.041254	0.02018	0.022283	0.03039	0.023236	0.063232	0.054651	0.018605	0.060833	0.023511	0.058484	0.055457	0.13127	0.072519	0.068383	0.11499	0.02202	0.053073	0.075706	0.030956	0.026807	0.0109	0.011746	0.10235	0.022565	0.076667	0.10598
Q8N2K0	0.0036964	0.030922	0.030743	0.0094005	0.031162	0.0010198	0.00063468	0.00042406	0.0031804	0.0024575	0.0087267	0.016496	0.01959	0.0088441	0.0014501	0.00035038	0.0011941	0.0011535	0.0009948	0.039386	0.019482	0.039952	0.02913	0.03821	0.044456	0.027938	0.013151	0.020531	0.083081	0.036984	0.036273	0.045439	0.038165	0.081485	0.17624	0.11139	0.1696	0.12316	0.031043	0.095605	0.06756	0.080068	0.078579	0.044628	0.069362	0.16204	0.085257	0.11561	0.23726
O60701	0.0052615	0.00059055	0.00071722	9.1249e-05	0.0023248	1.7737e-05	0.0011146	0.0012127	0.0021482	0.0016389	0.0011392	0.0027545	0.0030213	0.0035853	0.00089965	0.0048527	0.014335	0.077285	0.012843	0.008052	0.012203	0.02518	0.015491	0.0035356	0.012752	0.00090066	8.0899e-06	0.0062017	0.0014681	0.0036907	0.0028807	0.069004	0.043706	0.010783	0.028516	0.0144	0.014555	0.078153	0.12294	0.063015	0.010463	0.0080978	0.0029445	0.018929	0.012921	0.0046687	0.018395	0.019372	0.1182
Q9NR45	0.0011318	4.8377e-05	0.00014349	1.1746e-05	0.00071187	0.00016915	0.00044937	0.00068077	0.00074651	0.00080886	0.00026819	0.0013238	0.0011613	0.0020064	0.00089678	0.0023273	0.006792	0.029415	0.0064378	0.0017992	0.0041891	0.013267	0.0047974	0.00049342	0.001152	0.00025131	3.1799e-05	0.0044613	0.00091811	0.00086439	0.00079388	0.024059	0.017671	0.0013283	0.007482	0.004557	0.0020299	0.017776	0.050628	0.013004	0.0027776	0.0019111	0.00050329	0.0057484	0.0031588	0.00069279	0.0029843	0.0087517	0.065194
Q06323	0.004349	0.00047005	0.00081828	0.0011814	0.0017137	9.7354e-05	0.00036086	0.00043401	0.0012574	0.00079236	0.001019	0.0053326	0.0017714	0.0022071	0.00013613	0.0016054	0.0039442	0.041841	0.015578	0.017404	0.017567	0.01042	0.020645	0.0071385	0.018422	0.0094942	0.00073391	0.033081	0.015284	0.024617	0.0034778	0.1407	0.061068	0.0039475	0.066439	0.017111	0.03134	0.085271	0.036954	0.011848	0.0045144	0.0082665	0.0093148	0.005788	0.0060598	0.0093289	0.012166	0.030793	0.07764
P00558	0.0030098	0.00039101	0.0031223	0.00076793	0.0068567	0.00015887	0.0013825	0.0017007	0.0053158	0.0037335	0.0041459	0.0081334	0.002357	0.0054632	0.0013743	0.0047548	0.011732	0.018606	0.0032068	0.017515	0.034291	0.033912	0.02739	0.015486	0.011526	0.0031844	0.0014815	0.016456	0.016776	0.015032	0.0068126	0.062356	0.043981	0.016792	0.087595	0.01328	0.021024	0.072676	0.048382	0.020469	0.0048766	0.0047981	0.0036939	0.0055246	0.002703	0.014063	0.0058097	0.007579	0.028448
P27695	0.0011436	0.00040205	0.00039533	0.00028837	0.0055408	8.8967e-06	0.00014863	0.00020771	0.0013901	0.00055905	0.0010972	0.0025531	0.001107	0.0017405	0.00029558	0.0004924	0.0028836	0.024653	0.0045658	0.02105	0.015093	0.031795	0.014564	0.0041924	0.013194	0.0024501	0.00043988	0.025649	0.0052397	0.0045145	0.0075771	0.047982	0.061304	0.0060217	0.07762	0.020427	0.034369	0.085372	0.056753	0.027096	0.013066	0.0031193	0.0010085	0.0014668	0.0019656	0.0065492	0.0076183	0.014329	0.029342
Q00688	0.00047644	7.3194e-05	0.0003787	0.00036269	0.0014442	0.00043241	0.00012905	0.00030545	0.00064747	0.00087067	0.00083349	0.0036489	0.0013974	0.0029666	0.00058371	0.00057052	0.0024369	0.005024	0.0020374	0.0088169	0.0090172	0.01778	0.0079539	0.0022146	0.0018425	0.0025753	0.0032233	0.019655	0.020284	0.0058433	0.0018164	0.03141	0.030915	0.0018552	0.056699	0.015897	0.015863	0.028001	0.01427	0.002409	0.0049745	0.0011598	0.00085916	0.00040537	0.00031316	0.0027352	0.00072031	0.0051397	0.022703
Q9UL46	0.0039711	0.0015044	0.0027113	0.0012756	0.0027654	0.00013364	0.00033867	0.00032399	0.001186	0.00086809	0.0011869	0.0076101	0.0031869	0.0027342	0.00015812	0.00082882	0.0023212	0.017302	0.0071188	0.011044	0.011727	0.011729	0.014075	0.011319	0.017569	0.0083853	0.00033828	0.012085	0.022537	0.019962	0.002269	0.11053	0.037911	0.010329	0.055217	0.020703	0.035217	0.068343	0.033153	0.023981	0.0039088	0.022821	0.019436	0.013673	0.014621	0.018647	0.01716	0.03331	0.12594
P15880	0.010702	0.0039277	0.0057044	0.0013343	0.0013399	1.2079e-05	5.259e-05	9.6052e-05	0.00026982	0.0005456	0.00087524	0.0019083	0.0016082	0.0025568	0.0018548	0.00022014	0.00066663	0.010571	0.01082	0.023094	0.01635	0.033071	0.02866	0.0075724	0.017916	0.0090157	0.0022365	0.029244	0.013292	0.022745	0.0077618	0.075648	0.07358	0.030845	0.091256	0.060792	0.055616	0.17552	0.06006	0.074524	0.073364	0.026048	0.012639	0.012491	0.010768	0.06091	0.026673	0.11607	0.22256
P20042	0.0034888	0.0029318	0.0036711	0.0019975	0.0007477	7.9756e-05	1.8104e-05	2.1923e-05	0.00021703	8.4019e-05	0.00035882	0.0015805	0.0003947	0.00050246	0.00028097	8.4732e-05	0.00017168	0.0039513	0.0031517	0.0107	0.0032185	0.0055197	0.0033605	0.004495	0.0062205	0.010055	0.011049	0.051917	0.023195	0.021514	0.011455	0.054723	0.02495	0.0056153	0.043584	0.014916	0.030488	0.036212	0.0042147	0.023769	0.03478	0.037734	0.018653	0.015285	0.018543	0.056	0.048085	0.10662	0.27456
P09429	0.0007014	0.00027685	0.00091097	0.00051355	0.00029836	5.0115e-05	3.9194e-06	6.3949e-06	3.883e-05	1.352e-05	4.3529e-05	0.00066984	3.8966e-05	4.3991e-05	8.1209e-05	2.7424e-05	6.8051e-05	0.002492	0.0014286	0.0035854	0.0013268	0.0025729	0.0016619	0.0023211	0.0038963	0.0034905	0.0028796	0.045925	0.0082223	0.0093264	0.00081988	0.03357	0.014874	0.0018752	0.018639	0.0036808	0.010995	0.014334	0.0027064	0.0054281	0.0053904	0.014691	0.010713	0.008376	0.0083298	0.026382	0.021488	0.11369	0.14641
Q12906	0.0011737	0.00084969	0.0017809	0.00032946	0.00026728	2.5174e-05	1.7401e-06	3.8171e-06	7.8683e-06	3.0444e-05	3.5541e-05	0.00054552	0.00023042	0.00021829	0.00028029	6.0206e-06	2.3999e-05	0.00083995	0.0017108	0.0037908	0.0018366	0.0068919	0.0040896	0.0019928	0.0042874	0.00379	0.00078074	0.018667	0.0074898	0.0045737	0.0005554	0.022878	0.019627	0.0081607	0.017626	0.014706	0.013501	0.032728	0.010879	0.01675	0.013179	0.019466	0.011984	0.0098771	0.00838	0.029257	0.012593	0.11941	0.19615
P39023	0.00333	0.0013798	0.0015025	0.00049603	0.00045527	3.1048e-06	1.5967e-05	2.8969e-05	5.9128e-05	0.00011983	0.00017171	0.001628	0.00083831	0.00088407	0.00040108	8.7122e-05	0.0003162	0.0064989	0.0048896	0.010542	0.0047765	0.013008	0.0089621	0.0033182	0.0094909	0.0053956	0.00078105	0.027555	0.011147	0.010792	0.0021169	0.066892	0.043199	0.0092542	0.042607	0.029272	0.029816	0.067829	0.026291	0.036291	0.02823	0.021757	0.010541	0.0089319	0.0087548	0.024003	0.017951	0.074725	0.19585
Q13200	0.0025983	0.0030451	0.0027822	0.0012232	0.0012164	3.5744e-05	7.7024e-06	1.0239e-05	6.4947e-05	9.905e-05	0.00026324	0.0015785	0.0012783	0.00081474	0.00017314	1.2375e-05	8.9494e-05	0.0036033	0.0041546	0.012046	0.0045872	0.012218	0.0091332	0.0049446	0.015176	0.0094989	0.0010423	0.020459	0.016378	0.010613	0.0023441	0.050066	0.040199	0.015152	0.054092	0.040452	0.052841	0.085235	0.022929	0.032414	0.025713	0.028201	0.019417	0.010998	0.014505	0.040756	0.024192	0.117	0.21673
O00231	0.001279	0.00041169	0.00042527	0.00043436	0.00033535	5.8684e-05	7.388e-06	2.2039e-05	2.8934e-05	0.00011554	0.00011916	0.0011975	0.00095621	0.00095627	0.00017818	3.632e-05	0.00026191	0.0057696	0.0055969	0.008791	0.0042172	0.010946	0.0083821	0.001511	0.0065294	0.0054008	0.00068403	0.021565	0.01195	0.0058539	0.00054026	0.046412	0.043776	0.0041915	0.042611	0.03146	0.029378	0.06084	0.022762	0.0086837	0.013084	0.006259	0.0051301	0.0022116	0.0025096	0.0082966	0.0044136	0.052558	0.10884
P35268	0.0015287	0.00018924	0.00077131	0.00014991	3.8341e-05	6.5061e-06	3.7651e-06	1.5559e-05	1.1433e-05	4.2458e-05	4.0925e-05	0.00034886	7.7683e-05	0.00021456	0.00069547	9.2645e-05	0.00026872	0.0027012	0.0015964	0.0035477	0.001632	0.0070237	0.0027446	0.0010304	0.0016654	0.0013503	0.0026934	0.033562	0.006048	0.0064158	0.00062914	0.028208	0.020266	0.0038822	0.022082	0.0093305	0.0092646	0.023537	0.0079036	0.012378	0.023924	0.0092846	0.003915	0.0064538	0.0035557	0.01917	0.011657	0.076721	0.17883
P42677	0.0017486	0.00018532	0.00082825	9.5805e-05	2.7481e-05	1.5654e-05	3.3372e-06	1.1786e-05	7.1772e-06	3.9597e-05	2.0357e-05	0.00015483	6.5938e-05	0.00016265	0.00053098	5.6984e-05	0.00020815	0.0033705	0.0023762	0.0018901	0.0012562	0.0063734	0.0024296	0.00082906	0.0018938	0.00099044	0.00060666	0.015372	0.0029078	0.0027314	0.00014908	0.019602	0.017332	0.0060512	0.011862	0.0077335	0.0065381	0.026749	0.013183	0.013846	0.014599	0.010095	0.0044572	0.010021	0.0049761	0.017252	0.010476	0.098537	0.21269
P05141	0.0033264	0.00012428	0.0004898	0.00067896	0.00092466	4.4724e-05	0.00027979	0.00070569	0.00054859	0.001243	0.00048605	0.0032566	0.00050994	0.0025987	0.0021977	0.0010871	0.0033515	0.015841	0.010448	0.021864	0.018136	0.037651	0.016617	0.0045727	0.0097711	0.0060554	0.00096543	0.06819	0.012903	0.0028536	0.0009755	0.062251	0.10315	0.0087774	0.043256	0.01902	0.013007	0.064201	0.048445	0.013566	0.010339	0.0044811	0.0012848	0.00078623	0.00017551	0.0031453	0.0007303	0.018309	0.035381
P40616	0.0050895	0.00023755	0.00074673	0.0005913	0.0006739	0.00014701	0.00023848	0.0005539	0.00041631	0.0011254	0.00028708	0.0021263	0.00054405	0.0027511	0.0022645	0.00076754	0.0017584	0.015501	0.020045	0.015043	0.017742	0.029345	0.019166	0.0027969	0.0068506	0.0077445	0.0004727	0.04257	0.0077008	0.002393	0.0013989	0.052723	0.088089	0.0074583	0.02145	0.017196	0.0063912	0.069193	0.056456	0.014921	0.0083546	0.0060986	0.0018521	0.0015796	0.00045541	0.0034875	0.00071188	0.029788	0.058413
Q9NZB2	0.0041218	0.00091765	0.0011085	0.00060491	0.0011824	8.1848e-05	0.00010566	0.00020397	0.00036942	0.00085995	0.00046192	0.0011503	0.0012892	0.0031663	0.00093801	0.00026835	0.0013113	0.012991	0.012495	0.016677	0.014464	0.031511	0.017262	0.0027738	0.010389	0.006958	0.00026546	0.016071	0.0077725	0.0013091	0.002835	0.033245	0.077579	0.017778	0.035697	0.034517	0.020117	0.11158	0.069775	0.029507	0.01895	0.0077556	0.0026123	0.0029669	0.0015964	0.0068971	0.0023767	0.032061	0.097034
O00764	0.015006	0.0012025	0.004244	0.00118	0.0014565	5.659e-05	0.00033371	0.00070696	0.00075919	0.0019929	0.0010379	0.0038287	0.0012483	0.0048482	0.0051688	0.0011497	0.0021752	0.018928	0.025496	0.025628	0.036103	0.052067	0.049008	0.0091761	0.015671	0.010038	0.00097802	0.040372	0.011182	0.016735	0.0037455	0.096648	0.1126	0.025269	0.063587	0.040783	0.020969	0.16794	0.097325	0.049109	0.028921	0.013979	0.005531	0.004953	0.0019911	0.024088	0.0043551	0.063286	0.096097
P62753	0.012995	0.0019534	0.00308	0.00084893	0.00078083	1.5034e-05	8.31e-05	0.00010694	0.00029238	0.00027006	0.00023001	0.0013071	0.00039629	0.00084023	0.00082027	0.00030306	0.00049621	0.027569	0.027067	0.01262	0.012564	0.015492	0.020174	0.0053926	0.017966	0.0088739	0.00024694	0.031829	0.0036575	0.015105	0.0038336	0.098604	0.065685	0.013043	0.026826	0.018101	0.017096	0.12124	0.061544	0.05893	0.019683	0.031892	0.013935	0.018647	0.015014	0.035884	0.027979	0.1513	0.23023
P15531	0.0012136	0.0015189	0.0024207	0.0010624	0.00033942	8.1588e-05	7.2545e-05	5.8057e-05	0.00021801	0.00011192	0.0002078	0.00016695	0.0001445	0.00017595	0.00015632	0.00044895	0.0011014	0.0033934	0.00053282	0.0054688	0.0013893	0.0024143	0.00093738	0.002629	0.0060502	0.0046016	0.006082	0.036052	0.0091839	0.0011719	0.0060998	0.0089277	0.012733	0.016434	0.011828	0.0039067	0.010783	0.015102	0.0033208	0.017955	0.02227	0.026961	0.017972	0.04063	0.023718	0.035314	0.050766	0.10659	0.34076
P16949	0.00089154	0.0013178	0.00024363	0.0019504	0.00091891	0.00017653	1.1709e-05	1.3753e-05	0.00010772	7.8062e-05	0.00016356	0.00043659	0.00083179	0.00071423	8.1944e-06	3.062e-05	0.00020143	0.0098812	0.0095419	0.023819	0.0061815	0.0046105	0.0079112	0.0010629	0.014426	0.023888	0.0026953	0.054273	0.014166	0.0018375	0.010666	0.030076	0.063433	0.0035983	0.035763	0.027326	0.035474	0.072927	0.013553	0.0055179	0.01692	0.0069016	0.0079239	0.0024831	0.0041127	0.0066277	0.0088083	0.063496	0.12654
P30048	3.525e-05	4.6398e-05	4.1268e-05	2.3192e-05	0.0012009	8.8635e-07	3.2232e-05	7.9573e-05	0.00012226	0.00014052	0.00014081	0.00023086	0.00020126	0.00043483	0.00064023	0.0002898	0.0018336	0.0030703	0.00019414	0.010809	0.0036103	0.020666	0.0037483	0.0003739	0.0022796	0.00048279	0.001628	0.047849	0.0017999	7.0135e-05	0.0044554	0.0037521	0.031337	0.0037385	0.025399	0.0094752	0.0078122	0.018263	0.019783	0.010713	0.024828	0.00055289	0.00012394	0.00078013	0.00034061	0.0018513	0.0024416	0.012598	0.026319
Q13283	0.0014558	0.0006394	0.00025396	0.00027474	0.0003637	1.2025e-07	2.4691e-05	2.1769e-05	8.7877e-05	3.0243e-05	5.8093e-05	0.00025682	0.00017425	0.00017683	4.7623e-05	0.00031359	0.00056798	0.016278	0.005758	0.013837	0.0051965	0.0033055	0.0083016	0.00093611	0.010142	0.0067399	0.0010829	0.067072	0.0022439	0.0042307	0.014037	0.043638	0.040111	0.0027097	0.018152	0.0081364	0.010516	0.0478	0.017382	0.02158	0.022776	0.0098708	0.0071615	0.011064	0.010271	0.011658	0.029324	0.07955	0.16796
P00491	0.00039216	0.00030807	0.0001841	0.00014582	0.0014482	6.3688e-06	2.3377e-06	3.8632e-06	2.4537e-05	5.6376e-06	5.3194e-06	0.0001365	1.0409e-05	1.9342e-05	0.00019491	2.5081e-06	9.9008e-06	0.0049114	0.0057044	0.0083638	0.0029097	0.0095519	0.0047461	0.00063699	0.0076468	0.0040018	0.0002061	0.073357	0.00037369	0.00039312	0.0026581	0.012792	0.041627	0.0019167	0.0058892	0.0045331	0.0043245	0.029213	0.022793	0.015767	0.0075902	0.0077133	0.0024586	0.0029083	0.0034405	0.0092536	0.009207	0.14928	0.067483
Q9H3R2	2.7961e-05	2.6607e-05	3.2557e-05	1.7424e-05	0.0015037	3.6861e-06	9.1742e-06	2.2138e-05	7.0078e-05	4.5379e-05	3.7687e-05	0.00010989	4.5439e-05	0.00011403	0.00026478	4.417e-05	0.0003923	0.0031103	0.00061921	0.0070714	0.0032345	0.015822	0.0036906	0.00031687	0.0027839	0.00059001	0.00030855	0.037138	0.0004923	3.1043e-05	0.0019535	0.0031048	0.029104	0.0023815	0.01263	0.0049239	0.0042947	0.01942	0.022711	0.0073609	0.0077248	0.00059499	0.00015684	0.0006316	0.00038128	0.0019083	0.0017667	0.028498	0.019703
P53396	0.0033327	0.0023397	0.0017184	0.00027616	0.0012417	9.9672e-08	4.6416e-05	3.9189e-05	0.00016808	0.00014346	0.00021177	0.00061056	0.00078905	0.00067879	0.00026056	0.00020307	0.00066513	0.012179	0.0048288	0.012714	0.0071453	0.013993	0.012821	0.0033276	0.017433	0.0044029	0.00012034	0.018913	0.002652	0.0033566	0.0071393	0.039649	0.043556	0.020563	0.02779	0.022232	0.022517	0.093795	0.054242	0.076837	0.03206	0.023438	0.011129	0.021762	0.018439	0.026975	0.033744	0.089914	0.22161
P06748	0.00048823	0.00036151	0.00032466	0.00027663	0.0021002	2.6313e-06	9.8122e-06	1.894e-05	0.00015339	7.066e-05	0.00013368	0.00078131	0.00014736	0.00029737	0.00019496	2.1942e-05	0.00021488	0.0050437	0.0021279	0.014345	0.0053453	0.019267	0.0053349	0.0022392	0.0088798	0.0033152	0.00056023	0.045027	0.0045302	0.0011285	0.0031675	0.022914	0.049969	0.0053684	0.033952	0.012935	0.018955	0.045439	0.023631	0.019487	0.01256	0.0063754	0.0016377	0.0013202	0.0014875	0.0086558	0.0059391	0.040279	0.048906
P39687	0.00086035	0.00048784	0.00054881	0.00064686	0.00086333	2.7006e-05	1.4822e-05	1.4209e-05	0.00012643	6.9829e-05	0.00010927	0.0011605	0.00037408	0.00037747	9.8735e-06	4.2592e-05	0.00016228	0.0055183	0.0041675	0.009538	0.0057323	0.0042284	0.0069292	0.0028921	0.010153	0.0095901	0.00035315	0.024333	0.010352	0.0043399	0.002497	0.04585	0.034154	0.0037669	0.024676	0.010214	0.016181	0.045197	0.01273	0.0077103	0.0028214	0.010619	0.0097216	0.0042915	0.0048549	0.0096442	0.0074912	0.044927	0.094223
P00492	0.00041926	0.0002663	0.00018942	0.00074882	0.002511	3.0781e-05	7.7009e-05	0.00011109	0.00043568	0.00035779	0.0003595	0.0026356	0.0008969	0.0014754	5.7423e-05	0.00017773	0.0008656	0.0066051	0.0037995	0.023924	0.013298	0.014044	0.012058	0.0031787	0.011851	0.011593	0.00067891	0.046563	0.016401	0.0016077	0.0050351	0.040873	0.068188	0.0038912	0.042922	0.017632	0.01968	0.051239	0.022012	0.0060448	0.0039105	0.0034788	0.0026282	0.00049809	0.00052939	0.0021157	0.0011324	0.0099963	0.02446
Q14974	0.0010287	0.0018935	0.00053714	0.0008419	0.0023284	4.641e-06	7.278e-06	8.0855e-06	0.00010769	4.3383e-05	0.00013975	0.001474	0.00068622	0.00051194	5.3427e-05	8.9618e-06	6.8284e-05	0.0062923	0.0054216	0.02103	0.0054532	0.011733	0.0078496	0.0024941	0.015493	0.012212	0.00078528	0.051921	0.0098042	0.0039537	0.0088762	0.049074	0.05922	0.0043158	0.0397	0.027104	0.035577	0.065242	0.022033	0.026987	0.019945	0.017081	0.00765	0.0030486	0.0063727	0.013455	0.014768	0.063593	0.10745
P05387	0.00088001	0.00031106	0.00013526	0.0002373	0.00014881	2.1849e-06	2.348e-07	1.5068e-06	1.873e-06	3.1353e-06	4.1257e-06	0.00012392	2.4543e-05	4.3867e-05	0.00022694	2.9704e-06	1.7072e-05	0.005282	0.0060713	0.0094146	0.0016436	0.0074188	0.0035465	0.00038484	0.0055507	0.0046564	0.0012875	0.089621	0.0021066	0.0018626	0.0015562	0.026392	0.048641	0.001614	0.01518	0.012258	0.01185	0.0363	0.013714	0.012743	0.02662	0.0083022	0.0029634	0.0023659	0.0026788	0.010745	0.011059	0.1449	0.13441
Q9ULZ3	0.0020453	0.00036623	0.00019026	0.00045281	0.00053409	3.156e-07	2.6817e-05	5.3059e-05	5.8442e-05	3.3612e-05	3.202e-05	0.0010961	6.5256e-05	0.00010923	0.00037271	0.00012983	0.00039766	0.019967	0.0091497	0.015357	0.0033934	0.011953	0.0047703	0.0022521	0.016204	0.0055378	0.00053504	0.13162	0.0034796	0.0034982	0.0011654	0.074838	0.074596	0.0027928	0.020089	0.0093893	0.015203	0.037048	0.025321	0.02607	0.016322	0.017128	0.0053071	0.0048632	0.0045933	0.0091727	0.018137	0.11198	0.11708
P61923	0.0042306	0.00041586	0.00015956	0.00060064	0.0003827	2.7596e-06	3.355e-05	8.3883e-05	0.00010959	0.00012492	7.5664e-05	0.00086352	0.00018267	0.00063746	0.00049204	0.00019821	0.00060552	0.0296	0.02326	0.023817	0.0090677	0.016739	0.011577	0.0013496	0.012912	0.0099041	0.00074804	0.10339	0.0045325	0.0034824	0.0041389	0.080331	0.11024	0.0028025	0.028311	0.019159	0.01603	0.079914	0.041954	0.022929	0.025064	0.0089832	0.0022733	0.0016708	0.0014324	0.0047889	0.0065319	0.063979	0.10015
P62913	0.006356	0.00082959	0.0011241	0.00098484	0.00020073	3.788e-05	3.0794e-05	7.6666e-05	3.0555e-05	0.00019469	5.4527e-05	0.0010352	0.0003436	0.00084858	0.0009555	0.00011384	0.0001859	0.0098286	0.022794	0.014982	0.0098323	0.013849	0.018647	0.0024793	0.012693	0.015184	0.0005759	0.063849	0.0076884	0.0059613	0.0010977	0.070225	0.085669	0.008598	0.019586	0.025093	0.012287	0.086741	0.039902	0.019964	0.017206	0.017534	0.010344	0.0054494	0.003213	0.01374	0.0052332	0.13067	0.16416
O75369	0.003631	0.0016203	0.0011474	0.00016095	6.3158e-05	9.1161e-07	3.9e-06	5.3642e-06	2.5751e-06	2.363e-05	1.2368e-05	8.1147e-05	0.00032335	0.00025733	0.00033431	5.2445e-05	8.4258e-05	0.0061323	0.0083217	0.005915	0.0029671	0.0051753	0.010617	0.00057952	0.0071387	0.0052142	0.00026158	0.022972	0.0013105	0.0032943	0.0033006	0.027881	0.032141	0.010162	0.0096815	0.020532	0.0093709	0.07169	0.03362	0.042435	0.04129	0.020215	0.013617	0.024485	0.018211	0.026092	0.02753	0.18969	0.35519
[truncated: 484 more rows]
[truncated: 948 more columns]
