# Supplementary material for: Proteomic and metabolomic signatures of rectal tumor discriminate patients with different responses to preoperative radiotherapy
Source: Front Oncol. 2024 Feb 12;14:1323961. doi: 10.3389/fonc.2024.1323961 (PMC10896604; doi:10.3389/fonc.2024.1323961)
Supplement: Supplementary file 17 [file Table_7.xlsx]

## Sheet: Table S7
	Table S7. Results of the Pearson’s correlation analysis of total radiation dose received during neo-RT with abundances of identified proteins and metabolites in ALL patient group and the GR and PR subgroups.
				Difference GR vs. PR				Correlation with dose ALL				Correlation with dose GR				Correlation with dose PR
	COMPOUND	Gene name/HMDB Id	DAPs & DAMs	FC GR/PR	p-value	FDR	Classifier Rank Freq	Correlation with dose ALL	correlation coefficient	p-value	FDR	Correlation with dose GR	correlation coefficient	p-value	FDR	Correlation with dose PR	correlation coefficient	p-value	FDR
Acyl-coenzyme A synthetase ACSM3, mitochondrial	Acyl-coenzyme A synthetase ACSM3, mitochondrial	ACSM3	PR	only in B	0.00032348	0.0564675	0.06		-0.41495	0.068874	0.27042		na	na	na		0.15791	0.66305	0.93425
Cleavage and polyadenylation specificity factor subunit 1	Cleavage and polyadenylation specificity factor subunit 1	CPSF1	PR	only in B	0.00032348	0.0564675	0.28		-0.41741	0.067077	0.26924		na	na	na		0.41392	0.23438	0.93425
N-acetylgalactosaminyltransferase 7	N-acetylgalactosaminyltransferase 7	GALNT7	PR	only in B	0.00032348	0.0564675	0.14		-0.4288	0.05923	0.26019		na	na	na		0.2136	0.55349	0.93425
Elongation factor G, mitochondrial	Elongation factor G, mitochondrial	GFM1	PR	only in B	5.7e-05	0.0564675	0.56	neg	-0.49438	0.026707	0.2211		na	na	na		0.023844	0.94787	0.97478
Nucleolar GTP-binding protein 1	Nucleolar GTP-binding protein 1	GTPBP	PR	only in B	0.00032348	0.0564675	na	neg	-0.44766	0.047789	0.2377		na	na	na		0.086356	0.8125	0.94009
Involucrin	Involucrin	IVL	PR	only in B	0.00032348	0.0564675	0.64	neg	-0.4498	0.046605	0.23365		na	na	na		-0.12746	0.72566	0.93425
DNA ligase 1	DNA ligase 1	LIG1	PR	only in B	0.00032348	0.0564675	na		-0.37093	0.10738	0.32366		na	na	na		0.48221	0.15812	0.93425
Prominin-1	Prominin-1	PROM1	PR	only in B	0.00139807	0.122026	0.34		-0.42124	0.064359	0.26523		na	na	na		-0.12108	0.73899	0.93425
Ribosomal protein S6 kinase alpha-1	Ribosomal protein S6 kinase alpha-1	RPS6KA1	PR	only in B	0.00032348	0.0564675	0.3	neg	-0.48447	0.030406	0.2211		na	na	na		-0.28166	0.43047	0.93425
Glutathione reductase, mitochondrial	Glutathione reductase, mitochondrial	GSR	PR	0.497784	6.17159e-06	0.000191525	na	neg	-0.49626	0.026044	0.26544		-0.061582	0.8658	0.99946	neg	-0.71963	0.018958	0.87144
Phosphoribosylformylglycinamidine synthase	Phosphoribosylformylglycinamidine synthase	PFAS	PR	0.132152	2.03768e-06	0.00015809	0.02	neg	-0.67351	0.0011326	0.14735		-0.47971	0.1606	0.99322	neg	-0.79088	0.0064448	0.93425
C-terminal-binding protein 1	C-terminal-binding protein 1	CTBP1	PR	0.161927	4.05403e-06	0.000173179	na	neg	-0.52991	0.016253	0.21437		-0.30343	0.39405	0.99322	pos	0.65735	0.038877	0.93425
Eukaryotic translation initiation factor 3 subunit J	Eukaryotic translation initiation factor 3 subunit J	EIF3J	PR	0.178837	8.77586e-06	0.000234217	na	neg	-0.56105	0.010062	0.19757		-0.36166	0.30447	0.99322	pos	0.66975	0.03412	0.93425
Golgi SNAP receptor complex member 1	Golgi SNAP receptor complex member 1	GOSR1	PR	0.203247	0.00269926	0.0071732	na	neg	-0.45373	0.044495	0.23229		-0.21571	0.54949	0.99322	pos	0.77867	0.0079599	0.93425
Ensconsin	Ensconsin	MAP7	PR	0.00984123	0.00031307	0.00187244	0.06	neg	-0.47096	0.036087	0.22344		-0.19204	0.59506	0.99322	pos	0.64835	0.042595	0.93425
26S proteasome non-ATPase regulatory subunit 8	26S proteasome non-ATPase regulatory subunit 8	PSMD8	PR	0.310727	0.000364989	0.00158049	na	neg	-0.4453	0.049117	0.23824		-0.24577	0.4937	0.99322	pos	0.80865	0.0046227	0.93425
SWI/SNF-related matrix-associated actin-dependent regulator of chromatin subfamily A member 5	SWI/SNF-related matrix-associated actin-dependent regulator of chromatin subfamily A member 5	SMARCA5	PR	0.182138	0.00298941	0.007739	na	neg	-0.60101	0.0050691	0.19757		-0.47401	0.16635	0.99322	pos	0.6408	0.045896	0.93425
Antigen peptide transporter 2	Antigen peptide transporter 2	TAP2	PR	0.225852	0.000487149	0.00191635	na	neg	-0.45312	0.044818	0.25603		-0.19429	0.59068	0.99861	pos	0.68812	0.027825	0.90718
ATP-binding cassette sub-family F member 1	ATP-binding cassette sub-family F member 1	ABCF1	PR	0.269493	0.00220222	0.00582462	na		-0.33274	0.15173	0.32716		-0.0058898	0.98712	0.99861	pos	0.66012	0.037777	0.90718
Long-chain-fatty-acid--CoA ligase 5	Long-chain-fatty-acid--CoA ligase 5	ACSL5	PR	0.122863	0.00100798	0.00333564	na		-0.38715	0.091719	0.27968		-0.059701	0.86987	0.99861	pos	0.68493	0.028855	0.90718
Proteasomal ubiquitin receptor ADRM1	Proteasomal ubiquitin receptor ADRM1	ADRM1	PR	0.286014	0.00250509	0.00674057	na		-0.34263	0.13919	0.35153		-0.084014	0.81751	0.99322	pos	0.67739	0.031396	0.93425
Aminoacyl tRNA synthase complex-interacting multifunctional protein 2	Aminoacyl tRNA synthase complex-interacting multifunctional protein 2	AIMP2	PR	0.456159	0.000727556	0.00257549	na		-0.27548	0.23977	0.4038		0.081824	0.8222	0.99861	pos	0.67665	0.031653	0.90718
Ataxin-10	Ataxin-10	ATXN10	PR	0.301841	0.00113006	0.00355834	na		-0.15409	0.51657	0.68637		0.29754	0.40375	0.99322	pos	0.63854	0.046917	0.93425
Cell division cycle and apoptosis regulator protein 1	Cell division cycle and apoptosis regulator protein 1	CCAR1	PR	0.329491	0.000267805	0.00129595	na		-0.44132	0.051426	0.25968		-0.21956	0.5422	0.99861	pos	0.64671	0.043299	0.90718
CDGSH iron-sulfur domain-containing protein 2	CDGSH iron-sulfur domain-containing protein 2	CISD2	PR	0.467874	0.0162366	0.0304968	na		-0.29857	0.20102	0.36555		-0.10324	0.77656	0.99861	pos	0.65373	0.040348	0.90718
Catechol O-methyltransferase	Catechol O-methyltransferase	COMT	PR	0.263727	0.000601325	0.00223041	na		-0.21443	0.36396	0.48135		0.54686	0.10187	0.99946	pos	0.68539	0.028706	0.87144
Crk-like protein	Crk-like protein	CRKL	PR	0.352596	0.000146373	0.000886047	na		-0.31051	0.18271	0.35434		0.044817	0.90216	0.99861	pos	0.78968	0.0065841	0.90718
Catenin alpha-2	Catenin alpha-2	CTNNA2	PR	0.00122366	0.00817018	0.0167175	0.02		-0.32285	0.16502	0.33941		-0.36184	0.30422	0.99861	pos	0.73321	0.015827	0.90718
Eukaryotic translation initiation factor 4B	Eukaryotic translation initiation factor 4B	EIF4B	PR	0.421329	0.00100906	0.00329242	na		-0.35794	0.12125	0.3065		-0.12	0.74125	0.99861	pos	0.69528	0.025602	0.90718
Glycine--tRNA ligase	Glycine--tRNA ligase	GARS1	PR	0.282891	0.000106649	0.000739135	na		-0.44035	0.052002	0.26544		-0.13704	0.7058	0.99946	pos	0.7105	0.02129	0.87144
Histone H2A type 2-B	Histone H2A type 2-B	H2AC21	PR	0.409458	0.00330944	0.00835738	na		-0.26577	0.2574	0.40413		-0.1304	0.71955	0.99946	pos	0.75344	0.011859	0.87144
Histone H3.1	Histone H3.1	H3C1	PR	0.566406	0.0139953	0.0267957	na		-0.26921	0.25107	0.39735		-0.04125	0.90992	0.99946	pos	0.63521	0.048445	0.87144
HLA class I histocompatibility antigen, Cw-4 alpha chain	HLA class I histocompatibility antigen, Cw-4 alpha chain	HLA-C	PR	0.406379	0.00100798	0.00333564	na		-0.25184	0.28411	0.42185		0.055819	0.87828	0.99946	pos	0.73103	0.016304	0.87144
Insulin-like growth factor 2 mRNA-binding protein 2	Insulin-like growth factor 2 mRNA-binding protein 2	IGF2BP2	PR	0.082694	0.00824891	0.0175542	na		-0.27981	0.23216	0.45637		0.22711	0.52804	0.99322	pos	0.69245	0.026465	0.93425
Lysosome-associated membrane glycoprotein 1	Lysosome-associated membrane glycoprotein 1	LAMP1	PR	0.198339	0.0151732	0.0288094	na		-0.27041	0.24887	0.39488		-0.014992	0.96721	0.99946	pos	0.63885	0.046775	0.87144
Delta(14)-sterol reductase	Delta(14)-sterol reductase	LBR	PR	0.623094	0.0139092	0.0266815	na		-0.42274	0.063312	0.26647		-0.33482	0.34431	0.99861	pos	0.81594	0.0039954	0.90718
DNA mismatch repair protein Msh6	DNA mismatch repair protein Msh6	MSH6	PR	0.0164408	0.000296925	0.00187244	na		-0.26622	0.25656	0.46404		0.28084	0.43187	0.99322	pos	0.65697	0.03903	0.93425
Protein phosphatase 1G	Protein phosphatase 1G	PPM1G	PR	0.231396	1.59392e-05	0.000294111	0.02		-0.32585	0.16091	0.33928		0.061018	0.86702	0.99861	pos	0.70073	0.023995	0.90718
26S proteasome non-ATPase regulatory subunit 4	26S proteasome non-ATPase regulatory subunit 4	PSMD4	PR	0.595744	0.00574526	0.0131099	na		-0.29158	0.21227	0.37409		-0.11444	0.75291	0.99861	pos	0.64883	0.042395	0.90718
Ran-specific GTPase-activating protein	Ran-specific GTPase-activating protein	RANBP1	PR	0.182062	3.04746e-05	0.000375043	0.02		-0.40592	0.075766	0.27764		0.028613	0.93746	0.99861	pos	0.76445	0.010022	0.90718
Regulator of microtubule dynamics protein 1	Regulator of microtubule dynamics protein 1	RMDN1	PR	0.0633749	0.00218177	0.00582462	0.16		-0.42325	0.062959	0.26514		-0.38646	0.26997	0.99322	pos	0.63608	0.048044	0.93425
U2 small nuclear ribonucleoprotein B''	U2 small nuclear ribonucleoprotein B''	SNRPB2	PR	0.256031	0.000253154	0.00125811	na		-0.33407	0.15	0.32562		0.16602	0.64667	0.99861	pos	0.73116	0.016276	0.90718
TATA-binding protein-associated factor 2N	TATA-binding protein-associated factor 2N	TAF15	PR	0.115919	0.00032991	0.00147195	na		-0.31377	0.17792	0.34869		0.26691	0.45599	0.99861	pos	0.73611	0.015208	0.90718
Antigen peptide transporter 1	Antigen peptide transporter 1	TAP1	PR	0.183263	0.000439639	0.00215423	na		-0.2746	0.24132	0.4038		0.20875	0.56274	0.99861	pos	0.63985	0.046321	0.90718
Tapasin	Tapasin	TAPBP	PR	0.317329	0.000431515	0.00175688	na		-0.40954	0.072943	0.27712		-0.13035	0.71965	0.99861	pos	0.68977	0.0273	0.90718
Tight junction protein ZO-2	Tight junction protein ZO-2	TJP2	PR	0.19524	0.000100617	0.000712927	0.34		-0.099591	0.67613	0.77189		0.58805	0.073772	0.99861	pos	0.6662	0.035441	0.90718
Tropomodulin-3	Tropomodulin-3	TMOD3	PR	0.473496	7.08254e-05	0.000579679	na		-0.40103	0.079703	0.27796		-0.098801	0.78597	0.99861	pos	0.80158	0.0052967	0.90718
Tropomyosin alpha-3 chain	Tropomyosin alpha-3 chain	TPM3	PR	0.595852	0.0202921	0.0365179	na		-0.17911	0.44992	0.56456		0.053618	0.88305	0.99946	pos	0.69373	0.026073	0.87144
Annexin A4	Annexin A4	ANXA4	PR	0.386899	4.88861e-05	0.000480771	na		-0.28472	0.22371	0.37285	pos	0.729	0.016755	0.99946		0.22361	0.53458	0.91189
PRA1 family protein 3	PRA1 family protein 3	ARL6IP5	PR	0.176362	0.00493719	0.0127234	0.78		-0.29828	0.20147	0.35576	pos	0.78384	0.0072907	0.99946		-0.12779	0.72497	0.95266
Sodium/potassium-transporting ATPase subunit beta-1	Sodium/potassium-transporting ATPase subunit beta-1	ATP1B1	PR	0.350368	0.000483348	0.00190408	na		-0.062492	0.79353	0.83709	pos	0.65812	0.038571	0.99946		0.14199	0.69558	0.94091
Normal mucosa of esophagus-specific gene 1 protein	Normal mucosa of esophagus-specific gene 1 protein	C15orf48	PR	0.184759	0.00255878	0.00685205	na		0.0033231	0.98891	0.99208	pos	0.65244	0.040878	0.99861		-0.12	0.74124	0.95971
Calpain small subunit 1	Calpain small subunit 1	CAPNS1	PR	0.547312	0.000201145	0.00108247	0.02		-0.13294	0.57635	0.67241	pos	0.65249	0.040858	0.99946		0.20552	0.56895	0.91266
Cadherin-17	Cadherin-17	CDH17	PR	0.15584	0.00199657	0.00570374	na		-0.16488	0.48726	0.59914	pos	0.64982	0.041974	0.99946		0.20412	0.57163	0.91266
Ubiquinone biosynthesis protein COQ9, mitochondrial	Ubiquinone biosynthesis protein COQ9, mitochondrial	COQ9	PR	0.134886	0.00154235	0.00543174	na		-0.067174	0.77842	0.89278	pos	0.66437	0.036133	0.99322		0.019146	0.95813	0.97512
Cytochrome c oxidase subunit 2	Cytochrome c oxidase subunit 2	COX2	PR	0.402658	0.00403579	0.00979318	na		-0.087123	0.71494	0.77627	pos	0.63448	0.048785	0.99946		0.0084174	0.98159	0.99645
NADH-cytochrome b5 reductase 1	NADH-cytochrome b5 reductase 1	CYB5R1	PR	0.508736	0.0126651	0.024685	#REF!		-0.01989	0.93367	0.96652	pos	0.73759	0.014901	0.99322		0.17752	0.62368	0.93425
Dynein light chain 1, cytoplasmic	Dynein light chain 1, cytoplasmic	DYNLL1	PR	0.658707	0.00111896	0.0035379	na		-0.050788	0.83161	0.89018	pos	0.75645	0.011335	0.99861		-0.076845	0.83289	0.97632
Eukaryotic translation initiation factor 1A, X-chromosomal	Eukaryotic translation initiation factor 1A, X-chromosomal	EIF1AX	PR	0.297538	0.000111877	0.000762942	na		-0.013502	0.95495	0.97311	pos	0.90846	0.00027473	0.12665		0.62714	0.052292	0.90718
S-formylglutathione hydrolase	S-formylglutathione hydrolase	ESD	PR	0.688347	0.00556704	0.0128184	na		-0.13157	0.58032	0.67383	pos	0.66072	0.037545	0.99946		-0.19069	0.5977	0.91645
Four and a half LIM domains protein 2	Four and a half LIM domains protein 2	FHL2	PR	0.530937	0.0194531	0.0354188	na		-0.067102	0.77865	0.85119	pos	0.67937	0.030716	0.99861		-0.47415	0.16621	0.90718
Glycerol-3-phosphate dehydrogenase 1-like protein	Glycerol-3-phosphate dehydrogenase 1-like protein	GPD1L	PR	0.494301	2.25907e-05	0.00033384	na		-0.091142	0.70235	0.79206	pos	0.70081	0.023973	0.99861		0.35505	0.31406	0.90718
Inverted formin-2	Inverted formin-2	INF2	PR	0.338732	0.00402197	0.00976814	na		-0.045436	0.84915	0.93136	pos	0.63777	0.047266	0.99322		-0.48338	0.15696	0.93425
Jupiter microtubule associated homolog 2	Jupiter microtubule associated homolog 2	JPT2	PR	0.249022	0.000321258	0.0014519	na		0.014002	0.95328	0.97311	pos	0.68492	0.028861	0.99861		0.40394	0.24699	0.90718
Galectin-3	Galectin-3	LGALS3	PR	0.397457	0.000117054	0.000778408	na		-0.14864	0.53169	0.63699	pos	0.66372	0.036381	0.99946		0.13361	0.71289	0.95237
LIM domain and actin-binding protein 1	LIM domain and actin-binding protein 1	LIMA1	PR	0.594861	0.00664554	0.0148014	na		0.0030123	0.98994	0.99208	pos	0.8411	0.0022918	0.52953		0.24268	0.49931	0.90718
Malonic acid	Malonic acid	HMDB0000691	GR	1.42339	0.012259	0.12259	0.82		0.40831	0.092532	0.50664		0.14417	0.69109	0.89695		0.11718	0.78229	0.97034
L-Glutamic acid	L-Glutamic acid	HMDB0000148	GR	1.67131	0.0154727	0.135386	0.96		0.36815	0.13279	0.52523		0.26336	0.46222	0.89695		-0.6059	0.11136	0.68348
D-Ribose	D-Ribose	HMDB0000283	GR	1.68998	0.0342794	0.15481	0.4		0.19129	0.44704	0.74878		-0.024754	0.94588	0.99236	neg	-0.85294	0.0071002	0.41932
D-Xylulose	D-Xylulose	HMDB0001644	GR	1.92266	0.03985	0.212024	0.92		0.36666	0.13449	0.52523		0.15857	0.66171	0.89695		-0.16561	0.69511	0.95284
L-Glutamine	L-Glutamine	HMDB0000641	GR	1.9469	0.00854701	0.0747863	0.8		0.33979	0.16772	0.56838		0.0046358	0.98986	0.99581		-0.088313	0.83527	0.9857
1,5-Anhydrosorbitol	1,5-Anhydrosorbitol	HMDB0002712	GR	2.03066	0.0266466	0.128639	0.72		0.26807	0.28214	0.63743		0.15854	0.66178	0.89695		-0.56013	0.14875	0.68348
D-Glucose	D-Glucose	HMDB0000122	GR	2.43275	0.0135016	0.126014	0.78		0.10812	0.66936	0.96445		-0.29852	0.40213	0.89695		-0.51333	0.19323	0.71435
Citric acid	Citric acid	HMDB0000094	GR	2.77575	0.0030623	0.0329786	0.68	pos	0.53294	0.022769	0.31841		0.4847	0.15566	0.89177		-0.69726	0.054568	0.55477
4-Hydroxyproline	4-Hydroxyproline	HMDB0000725	GR	2.77689	0.0484067	0.233687	0.5	pos	0.50604	0.032138	0.32674		0.34595	0.32749	0.89695		-0.36064	0.38015	0.84324
Aminoadipic acid	Aminoadipic acid	HMDB0000510	GR	2.87865	0.0111132	0.11968	1		0.29832	0.22919	0.60786		-0.0019151	0.99581	0.99581		-0.54511	0.16234	0.68348
Inosine	Inosine	HMDB0000195	GR	3.32041	0.00140065	0.0245114	0.98	pos	0.47128	0.048354	0.3687		0.33074	0.35059	0.89695	neg	-0.79973	0.017185	0.41932
Cytosine	Cytosine	HMDB0000630	GR	3.76979	0.000651878	0.0182526	1		0.42208	0.081023	0.49424		-0.015708	0.96565	0.99236		-0.1791	0.6713	0.93677
D-Ribose 5-phosphate	D-Ribose 5-phosphate	HMDB0001548	GR	3.97977	0.00137118	0.0174514	0.84		0.30039	0.22582	0.60786		-0.15466	0.66967	0.89695		-0.47145	0.23829	0.72146
N-Acetyl-D-Glucosamine 6-Phosphate	N-Acetyl-D-Glucosamine 6-Phosphate	HMDB0001062	GR	4.73897	0.011655	0.0777001	0.58		0.3109	0.2092	0.59354		0.11802	0.74539	0.92311		-0.42252	0.29702	0.79045
Phosphoenolpyruvic acid	Phosphoenolpyruvic acid	HMDB0000263	GR	44.4642	0.00205677	0.0239956	0.98		0.36382	0.13776	0.52523		-0.18665	0.60564	0.89695		-0.28654	0.49142	0.90727
Nuclear migration protein nudC	Nuclear migration protein nudC	NUDC	PR	0.519825	0.00246595	0.00667213	na		-0.014248	0.95246	0.97311	pos	0.69885	0.02454	0.99861		0.31559	0.3744	0.90718
Optineurin	Optineurin	OPTN	PR	0.669635	0.0210855	0.0359264	na		0.20352	0.38945	0.58248	pos	0.66005	0.037807	0.99322		0.14434	0.69076	0.93425
Polymeric immunoglobulin receptor	Polymeric immunoglobulin receptor	PIGR	PR	0.133419	0.00058284	0.00242604	0.08		-0.12495	0.59968	0.68977	pos	0.75759	0.011141	0.99946		-0.098563	0.78648	0.96127
Protein phosphatase 1 regulatory subunit 7	Protein phosphatase 1 regulatory subunit 7	PPP1R7	PR	0.5779	0.000926534	0.00306976	na		-0.013898	0.95362	0.97311	pos	0.71694	0.019626	0.99861		-0.040895	0.91069	0.99105
Transcriptional activator protein Pur-beta	Transcriptional activator protein Pur-beta	PURB	PR	0.281971	0.000248104	0.00124185	na		-0.022327	0.92556	0.96482	pos	0.85323	0.001694	0.70724		0.56488	0.088866	0.93425
Pyrroline-5-carboxylate reductase 3	Pyrroline-5-carboxylate reductase 3	PYCR3	PR	0.000483307	0.000588152	0.00244087	0.02		-0.097053	0.68397	0.81798	pos	0.64768	0.042884	0.99322		0.56484	0.088892	0.93425
Methanethiol oxidase	Methanethiol oxidase	SELENBP1	PR	0.415694	0.00561201	0.0128901	na		-0.16344	0.49112	0.60238	pos	0.70863	0.021789	0.99946		-0.17547	0.62775	0.91897
Serpin B6	Serpin B6	SERPINB6	PR	0.693352	0.0213167	0.0379946	na		0.14721	0.53568	0.6402	pos	0.71741	0.019507	0.99946		-0.29557	0.40702	0.90222
N(4)-(beta-N-acetylglucosaminyl)-L-asparaginase	N(4)-(beta-N-acetylglucosaminyl)-L-asparaginase	AGA	PR	0.0414394	0.0201729	0.035369	na	neg	-0.67506	0.0010922	0.14735	neg	-0.6857	0.028604	0.99322		0.38752	0.26855	0.93425
V-type proton ATPase subunit d 1	V-type proton ATPase subunit d 1	ATP6V0D1	PR	0.24282	0.00282727	0.00705051	na	neg	-0.64187	0.0022809	0.20263	neg	-0.68151	0.029989	0.99861		0.54531	0.10304	0.90718
Coiled-coil domain-containing protein 124	Coiled-coil domain-containing protein 124	CCDC124	PR	0.14524	0.00691589	0.0152095	na	neg	-0.65767	0.0016242	0.14735	neg	-0.68912	0.027508	0.99322		0.32243	0.36355	0.93425
39S ribosomal protein L49, mitochondrial	39S ribosomal protein L49, mitochondrial	MRPL49	PR	0.230654	0.000853272	0.00288962	na	neg	-0.74706	0.00015382	0.044145	neg	-0.69441	0.025865	0.99322		0.090357	0.80395	0.93878
Phospholipase B-like 1	Phospholipase B-like 1	PLBD1	PR	0.297893	0.0120757	0.0238021	na	neg	-0.68255	0.00091342	0.20263	neg	-0.66338	0.036511	0.99861		0.33597	0.34255	0.90718
Multifunctional procollagen lysine hydroxylase and glycosyltransferase LH3	Multifunctional procollagen lysine hydroxylase and glycosyltransferase LH3	PLOD3	PR	0.222273	0.00359789	0.0085969	na	neg	-0.77694	5.59e-05	0.024063	neg	-0.69927	0.024419	0.99322		-0.49869	0.14232	0.93425
Peptidyl-prolyl cis-trans isomerase D	Peptidyl-prolyl cis-trans isomerase D	PPID	PR	0.096136	0.000323056	0.00187244	0.18	neg	-0.70597	0.00050467	0.15594	neg	-0.63866	0.04686	0.99861		0.10055	0.78226	0.96153
26S proteasome non-ATPase regulatory subunit 3	26S proteasome non-ATPase regulatory subunit 3	PSMD3	PR	0.465504	0.000717867	0.00254765	na	neg	-0.62855	0.0029949	0.20263	neg	-0.66427	0.036173	0.99861		0.534	0.11185	0.90718
Histone deacetylase complex subunit SAP18	Histone deacetylase complex subunit SAP18	SAP18	PR	0.0767801	0.0175568	0.0309766	na	neg	-0.59013	0.0061612	0.19757	neg	-0.65433	0.040102	0.99322		0.30531	0.39099	0.93425
Syntaxin-binding protein 2	Syntaxin-binding protein 2	STXBP2	PR	0.479423	0.00838628	0.0177178	na	neg	-0.75393	0.00012339	0.057189	neg	-0.70218	0.02358	0.99861		0.40547	0.24504	0.90718
SUN domain-containing protein 1	SUN domain-containing protein 1	SUN1	PR	0.415615	0.0113354	0.0225336	na	neg	-0.56647	0.0092129	0.19757	neg	-0.68848	0.02771	0.99322		0.48537	0.15501	0.93425
HLA class I histocompatibility antigen, B-58 alpha chain	HLA class I histocompatibility antigen, B-18 alpha chain	HLA-B	PR	0.142284	0.00220222	0.00582462	0.26		-0.11282	0.6358	0.72284	neg	-0.76215	0.010388	0.99946		0.46199	0.17887	0.87144
Acyl-CoA dehydrogenase family member 9, mitochondrial	Acyl-CoA dehydrogenase family member 9, mitochondrial	ACAD9	PR	0.138463	0.00706651	0.0149711	na	neg	-0.48073	0.031902	0.2211		-0.24307	0.4986	0.99322		0.40548	0.24503	0.93425
Short-chain specific acyl-CoA dehydrogenase, mitochondrial	Short-chain specific acyl-CoA dehydrogenase, mitochondrial	ACADS	PR	0.346164	0.000119139	0.000788519	na	neg	-0.4724	0.035444	0.24542		-0.18384	0.61118	0.99861		0.056213	0.87742	0.98617
Apoptotic chromatin condensation inducer in the nucleus	Apoptotic chromatin condensation inducer in the nucleus	ACIN1	PR	0.000514159	0.000440986	0.00215705	na	neg	-0.45507	0.043789	0.23229		-0.07914	0.82796	0.99322		0.32428	0.36065	0.93425
Acyl-coenzyme A thioesterase 9, mitochondrial	Acyl-coenzyme A thioesterase 9, mitochondrial	ACOT9	PR	0.436983	0.00246771	0.00667213	na	neg	-0.54284	0.01339	0.22195		-0.45091	0.1909	0.99861		-0.033374	0.92708	0.9975
Acyl-CoA synthetase family member 2, mitochondrial	Acyl-CoA synthetase family member 2, mitochondrial	ACSF2	PR	0.000606436	0.00318399	0.00790478	0.2	neg	-0.52459	0.017566	0.21437		-0.26244	0.46385	0.99322		-0.13276	0.71465	0.93425
Long-chain-fatty-acid--CoA ligase 3	Long-chain-fatty-acid--CoA ligase 3	ACSL3	PR	0.000464953	0.000151974	0.00187244	0.18	neg	-0.63707	0.00252	0.20263		-0.53412	0.11176	0.99861		0.34293	0.33201	0.90718
Adenosine kinase	Adenosine kinase	ADK	PR	0.319021	0.00375846	0.0092815	na	neg	-0.51085	0.021347	0.2211		-0.32058	0.36646	0.99322		0.021121	0.95382	0.97512
ADP-dependent glucokinase	ADP-dependent glucokinase	ADPGK	PR	0.00207384	0.0184873	0.0325568	na	neg	-0.48477	0.030288	0.2211		-0.45848	0.18263	0.99322		0.28927	0.41757	0.93425
Adenylosuccinate lyase	Adenylosuccinate lyase	ADSL	PR	0.381082	9.8946e-08	4.06714e-05	na	neg	-0.50509	0.023114	0.24371		-0.19091	0.59728	0.99861		0.62456	0.053562	0.90718
Agmatinase, mitochondrial	Agmatinase, mitochondrial	AGMAT	PR	0.0716509	0.00191507	0.00627869	na	neg	-0.50607	0.022805	0.2211		-0.21543	0.55001	0.99322		0.16383	0.65109	0.93425
Adenosylhomocysteinase	Adenosylhomocysteinase	AHCY	PR	0.191209	0.000319519	0.00144748	na	neg	-0.44798	0.047609	0.26544		-0.10077	0.7818	0.99946		0.30503	0.39144	0.89588
Aminoacyl tRNA synthase complex-interacting multifunctional protein 1	Aminoacyl tRNA synthase complex-interacting multifunctional protein 1	AIMP1	PR	0.531565	0.0154747	0.0292626	na	neg	-0.46885	0.037045	0.24542		-0.39169	0.26297	0.99861		0.18505	0.60878	0.92778
Aflatoxin B1 aldehyde reductase member 3	Aflatoxin B1 aldehyde reductase member 3	AKR7A3	PR	0.176255	6.986e-05	0.000577275	na	neg	-0.50388	0.0235	0.2211		-0.19891	0.5817	0.99322		-0.1301	0.72017	0.93425
4-trimethylaminobutyraldehyde dehydrogenase	4-trimethylaminobutyraldehyde dehydrogenase	ALDH9A1	PR	0.654196	3.45507e-05	0.000395493	na	neg	-0.55319	0.011405	0.26544		-0.29191	0.41313	0.99946		-0.18849	0.60202	0.91645
Acidic leucine-rich nuclear phosphoprotein 32 family member B	Acidic leucine-rich nuclear phosphoprotein 32 family member B	ANP32B	PR	0.174599	9.08767e-06	0.000234217	na	neg	-0.56944	0.0087743	0.26544		-0.35285	0.31728	0.99946		0.32133	0.36529	0.88984
Acidic leucine-rich nuclear phosphoprotein 32 family member E	Acidic leucine-rich nuclear phosphoprotein 32 family member E	ANP32E	PR	0.277767	1.80796e-05	0.00029469	na	neg	-0.50351	0.023617	0.24371		-0.24067	0.50298	0.99861		0.41995	0.22694	0.90718
Annexin A11	Annexin A11	ANXA11	PR	0.478049	9.02866e-08	4.06714e-05	0.1	neg	-0.50303	0.023772	0.26544		-0.26047	0.46733	0.99946		0.474	0.16636	0.87144
AP-1 complex subunit beta-1	AP-1 complex subunit beta-1	AP1B1	PR	0.388672	9.38111e-06	0.000234217	na	neg	-0.5633	0.0097022	0.26544		-0.35882	0.30857	0.99946		0.41444	0.23374	0.87144
AP-1 complex subunit gamma-1	AP-1 complex subunit gamma-1	AP1G1	PR	0.450391	0.00288224	0.00757301	na	neg	-0.48624	0.029716	0.26544		-0.30185	0.39665	0.99946		0.20305	0.57369	0.91266
AP-2 complex subunit beta	AP-2 complex subunit beta	AP2B1	PR	0.491335	0.000514263	0.00198389	na	neg	-0.47086	0.036131	0.26544		-0.21891	0.54343	0.99946		0.30988	0.38357	0.89588
AP-2 complex subunit mu	AP-2 complex subunit mu	AP2M1	PR	0.468156	0.000287754	0.00135154	na	neg	-0.50482	0.023199	0.24371		-0.27244	0.44633	0.99861		0.30238	0.39577	0.90718
Acylamino-acid-releasing enzyme	Acylamino-acid-releasing enzyme	APEH	PR	0.385172	1.0006e-06	0.000127031	0.02	neg	-0.60461	0.0047443	0.20263		-0.3877	0.2683	0.99861		-0.11265	0.75669	0.96153
Apoptosis inhibitor 5	Apoptosis inhibitor 5	API5	PR	0.18055	0.000231334	0.00117904	na	neg	-0.45509	0.043777	0.25603		-0.11036	0.76151	0.99861		0.4578	0.18337	0.90718
ADP-ribosylation factor 6	ADP-ribosylation factor 6	ARF6	PR	0.46483	0.000161188	0.000945287	0.02	neg	-0.47375	0.034851	0.24542		-0.16368	0.65138	0.99861		-0.11587	0.7499	0.96153
ADP-ribosylation factor GTPase-activating protein 2	ADP-ribosylation factor GTPase-activating protein 2	ARFGAP2	PR	0.332988	0.0229729	0.0404052	na	neg	-0.4518	0.045521	0.23229		-0.34234	0.3329	0.99322		0.20353	0.57276	0.93425
Arfaptin-1	Arfaptin-1	ARFIP1	PR	0.190113	0.000314399	0.00143249	na	neg	-0.44722	0.048036	0.2377		-0.12672	0.7272	0.99322		0.13436	0.71133	0.93425
ADP-ribosylation factor-like protein 1	ADP-ribosylation factor-like protein 1	ARL1	PR	0.288813	1.18579e-05	0.000258744	na	neg	-0.48242	0.031222	0.24542		-0.19068	0.59772	0.99861		0.30525	0.39109	0.90718
ADP-ribosylation factor-like protein 3	ADP-ribosylation factor-like protein 3	ARL3	PR	0.330354	2.76238e-06	0.000164534	na	neg	-0.58241	0.0070486	0.19757		-0.39389	0.26007	0.99322		0.4483	0.1938	0.93425
Actin-related protein 2/3 complex subunit 1A	Actin-related protein 2/3 complex subunit 1A	ARPC1A	PR	0.404982	0.00681292	0.0150423	na	neg	-0.48703	0.029413	0.24542		-0.3289	0.35344	0.99861		0.11215	0.75772	0.96153
ATP synthase subunit g, mitochondrial	ATP synthase subunit g, mitochondrial	ATP5MG	PR	0.485453	0.000143959	0.000879447	na	neg	-0.51967	0.018854	0.24371		-0.35588	0.31285	0.99861		0.31303	0.37848	0.90718
ATP synthase subunit d, mitochondrial	ATP synthase subunit d, mitochondrial	ATP5PD	PR	0.544901	8.40219e-05	0.000643366	na	neg	-0.48542	0.030036	0.26544		-0.19561	0.5881	0.99946		0.033476	0.92685	0.99007
ATP synthase-coupling factor 6, mitochondrial	ATP synthase-coupling factor 6, mitochondrial	ATP5PF	PR	0.503365	2.46854e-05	0.000355393	na	neg	-0.50156	0.024251	0.24371		-0.126	0.7287	0.99861		-0.53291	0.11272	0.90718
V-type proton ATPase subunit G 1	V-type proton ATPase subunit G 1	ATP6V1G1	PR	0.415813	0.000391485	0.00165264	na	neg	-0.51979	0.018821	0.2211		-0.32285	0.36289	0.99322		0.44212	0.20077	0.93425
BolA-like protein 2	BolA-like protein 2	BOLA2	PR	0.20068	9.56759e-06	0.000234217	na	neg	-0.45123	0.045826	0.25603		-0.074505	0.83792	0.99861		0.35161	0.31909	0.90718
Mitotic checkpoint protein BUB3	Mitotic checkpoint protein BUB3	BUB3	PR	0.253098	0.000213238	0.00112161	na	neg	-0.50463	0.023261	0.24371		-0.28342	0.42747	0.99861		0.32772	0.35528	0.90718
Basic leucine zipper and W2 domain-containing protein 2	Basic leucine zipper and W2 domain-containing protein 2	BZW2	PR	0.100861	0.000178614	0.00187244	0.16	neg	-0.56694	0.0091434	0.22195		-0.30673	0.38868	0.99861		0.014941	0.96732	0.9975
Ester hydrolase C11orf54	Ester hydrolase C11orf54	C11orf54	PR	0.383359	0.00100013	0.00327091	na	neg	-0.46556	0.038578	0.24542		-0.13203	0.71617	0.99861		-0.29078	0.41503	0.90718
Complement component 1 Q subcomponent-binding protein, mitochondrial	Complement component 1 Q subcomponent-binding protein, mitochondrial	C1QBP	PR	0.218966	2.03309e-05	0.000310296	0.02	neg	-0.45754	0.042518	0.26544		-0.021906	0.9521	0.99946		0.1285	0.7235	0.95237
Calcium-binding protein 39	Calcium-binding protein 39	CAB39	PR	0.507351	0.000166991	0.00095575	na	neg	-0.48167	0.03152	0.26544		-0.21247	0.55565	0.99946		0.068321	0.85124	0.97575
Calcyclin-binding protein	Calcyclin-binding protein	CACYBP	PR	0.261772	5.05142e-05	0.000493308	na	neg	-0.61768	0.0037073	0.20263		-0.47782	0.1625	0.99861		0.39673	0.25634	0.90718
Calmodulin-3	Calmodulin-3	CALM2	PR	0.610393	5.81314e-07	0.000101476	na	neg	-0.49575	0.026223	0.26544		-0.13943	0.70085	0.99946		0.05494	0.88018	0.97634
Caprin-1	Caprin-1	CAPRIN1	PR	0.363323	0.000294063	0.00137115	na	neg	-0.52591	0.017233	0.23803		-0.34245	0.33273	0.99861		0.44385	0.19881	0.90718
Caspase-6	Caspase-6	CASP6	PR	0.0676941	0.000240866	0.00187244	na	neg	-0.55346	0.011357	0.22195		-0.33077	0.35054	0.99861		0.19633	0.5867	0.92036
Chromobox protein homolog 3	Chromobox protein homolog 3	CBX3	PR	0.239606	0.000784626	0.00357814	na	neg	-0.47193	0.035655	0.26544		-0.25664	0.47414	0.99946		0.48295	0.15739	0.87144
Cyclin-dependent kinase 11B	Cyclin-dependent kinase 11B	CDK11B	PR	0.310125	0.00636132	0.0142594	na	neg	-0.47469	0.034444	0.2215		-0.27493	0.44203	0.99322		-0.025976	0.94322	0.97478
Cyclin-dependent-like kinase 5	Cyclin-dependent-like kinase 5	CDK5	PR	0.216252	0.00117802	0.00368031	na	neg	-0.51567	0.019953	0.2211		-0.22681	0.52859	0.99322		-0.23746	0.50886	0.93425
Carcinoembryonic antigen-related cell adhesion molecule 5	Carcinoembryonic antigen-related cell adhesion molecule 5	CEACAM5	PR	0.057928	0.0035935	0.0100521	0.96	neg	-0.56528	0.009395	0.26544		-0.38408	0.27318	0.99946		-0.17675	0.62522	0.91897
CUGBP Elav-like family member 2	CUGBP Elav-like family member 2	CELF2	PR	0.0344448	0.000528985	0.00242604	na	neg	-0.4894	0.028517	0.2211		-0.15655	0.66582	0.99322		-0.24109	0.50221	0.93425
Coiled-coil-helix-coiled-coil-helix domain-containing protein 2	Coiled-coil-helix-coiled-coil-helix domain-containing protein 2	CHCHD2	PR	0.116236	0.000470803	0.00263188	na	neg	-0.56272	0.0097938	0.22195		-0.37325	0.28807	0.99861		0.51904	0.1242	0.90718
MICOS complex subunit MIC19	MICOS complex subunit MIC19	CHCHD3	PR	0.355494	3.22911e-05	0.000388746	na	neg	-0.51399	0.020432	0.24371		-0.26702	0.45579	0.99861		0.40531	0.24524	0.90718
Calcium homeostasis endoplasmic reticulum protein	Calcium homeostasis endoplasmic reticulum protein	CHERP	PR	0.000408912	0.000202827	0.00187244	0.02	neg	-0.49342	0.027049	0.2211		-0.14177	0.69603	0.99322		0.30382	0.39342	0.93425
Chitinase domain-containing protein 1	Chitinase domain-containing protein 1	CHID1	PR	0.492971	0.0116999	0.0231758	na	neg	-0.54069	0.013836	0.19855		-0.40485	0.24582	0.99322		-0.12698	0.72667	0.93425
Charged multivesicular body protein 1a	Charged multivesicular body protein 1a	CHMP1A	PR	0.455861	0.00104292	0.00335583	na	neg	-0.50182	0.024167	0.2211		-0.29713	0.40444	0.99322		0.16335	0.65205	0.93425
Cysteine and histidine-rich domain-containing protein 1	Cysteine and histidine-rich domain-containing protein 1	CHORDC1	PR	0.151762	7.02518e-05	0.0005788	na	neg	-0.53447	0.015193	0.21108		-0.28136	0.43098	0.99322		0.14737	0.68454	0.93425
Claudin-3	Claudin-3	CLDN3	PR	0.161439	0.000178614	0.00187244	na	neg	-0.55111	0.011784	0.19757		-0.26814	0.45382	0.99322		-0.24488	0.49532	0.93425
UMP-CMP kinase	UMP-CMP kinase	CMPK1	PR	0.347617	1.66666e-05	0.00029469	na	neg	-0.47909	0.032579	0.26544		-0.18529	0.60831	0.99946		0.34211	0.33324	0.87144
Cytochrome c oxidase assembly factor 3 homolog, mitochondrial	Cytochrome c oxidase assembly factor 3 homolog, mitochondrial	COA3	PR	0.304501	0.000730167	0.0025782	na	neg	-0.51292	0.02074	0.2211		-0.27337	0.44473	0.99322		-0.085918	0.81344	0.94009
Cytochrome c oxidase assembly factor 6 homolog	Cytochrome c oxidase assembly factor 6 homolog	COA6	PR	0.266276	1.61114e-05	0.000294111	na	neg	-0.54261	0.013437	0.19821		-0.29284	0.41157	0.99322		0.11645	0.7487	0.93425
Bifunctional coenzyme A synthase	Bifunctional coenzyme A synthase	COASY	PR	0.299765	0.000951316	0.00313698	na	neg	-0.46598	0.038378	0.24542		-0.25408	0.4787	0.99861		0.21351	0.55365	0.90718
Coatomer subunit beta	Coatomer subunit beta	COPB1	PR	0.562841	0.00994576	0.0202467	na	neg	-0.60145	0.0050278	0.26544		-0.48766	0.15279	0.99946		0.11643	0.74874	0.95802
COP9 signalosome complex subunit 6	COP9 signalosome complex subunit 6	COPS6	PR	0.339141	0.000182221	0.00101182	na	neg	-0.49751	0.025612	0.2211		-0.25229	0.48193	0.99322		0.010039	0.97804	0.98954
Oxygen-dependent coproporphyrinogen-III oxidase, mitochondrial	Oxygen-dependent coproporphyrinogen-III oxidase, mitochondrial	CPOX	PR	0.0188651	0.000296925	0.00187244	0.12	neg	-0.57854	0.0075314	0.19757		-0.34649	0.32668	0.99322		-0.00066326	0.99855	0.99855
Tyrosine-protein kinase CSK	Tyrosine-protein kinase CSK	CSK	PR	0.272638	0.0013332	0.00407401	na	neg	-0.54618	0.012721	0.19757		-0.45138	0.19039	0.99322		0.47345	0.16692	0.93425
Cytochrome b5 type B	Cytochrome b5 type B	CYB5B	PR	0.231182	0.000510818	0.00197753	na	neg	-0.46068	0.040935	0.26544		-0.17395	0.6308	0.99946		0.30179	0.39675	0.89588
Cytochrome P450 2S1	Cytochrome P450 2S1	CYP2S1	PR	0.000194871	0.00013173	0.00187244	0.1	neg	-0.50344	0.02364	0.2211		-0.1855	0.6079	0.99322		0.4972	0.14371	0.93425
28S ribosomal protein S29, mitochondrial	28S ribosomal protein S29, mitochondrial	DAP3	PR	0.0789076	0.000172654	0.00187244	na	neg	-0.50704	0.022502	0.2211		-0.1692	0.64029	0.99322		0.10074	0.78186	0.93425
dCTP pyrophosphatase 1	dCTP pyrophosphatase 1	DCTPP1	PR	0.0545013	0.000178614	0.00187244	na	neg	-0.47187	0.035679	0.22344		-0.05857	0.87232	0.99322		0.03934	0.91408	0.96906
ATP-dependent RNA helicase DDX18	ATP-dependent RNA helicase DDX18	DDX18	PR	0.000307193	0.000110671	0.00187244	na	neg	-0.45595	0.043331	0.23229		-0.077091	0.83236	0.99322		0.37283	0.28866	0.93425
Probable ATP-dependent RNA helicase DDX27	Probable ATP-dependent RNA helicase DDX27	DDX27	PR	0.00180685	0.0184873	0.0325568	na	neg	-0.4859	0.029848	0.2211		-0.32399	0.3611	0.99322		-0.3096	0.38402	0.93425
ATP-dependent RNA helicase DDX3X	ATP-dependent RNA helicase DDX3X	DDX3X	PR	0.517938	8.06324e-06	0.000230565	na	neg	-0.48982	0.02836	0.26544		-0.21105	0.55835	0.99946		0.44667	0.19562	0.87144
Probable ATP-dependent RNA helicase DDX46	Probable ATP-dependent RNA helicase DDX46	DDX46	PR	0.000455253	0.00013173	0.00187244	na	neg	-0.51046	0.021462	0.2211		-0.30006	0.39959	0.99322		0.60461	0.064078	0.93425
Protein DEK	Protein DEK	DEK	PR	0.368912	0.0264085	0.045446	na	neg	-0.49692	0.025815	0.24419		-0.51356	0.12894	0.99861		0.38314	0.27445	0.90718
Diablo homolog, mitochondrial	Diablo homolog, mitochondrial	DIABLO	PR	0.0967038	0.000156878	0.000928305	0.04	neg	-0.57641	0.0078086	0.19757		-0.36618	0.29803	0.99322		0.07062	0.84629	0.9493
Protein diaphanous homolog 1	Protein diaphanous homolog 1	DIAPH1	PR	0.147903	0.000840971	0.00285399	na	neg	-0.47153	0.035834	0.24542		-0.1988	0.58192	0.99861		0.21583	0.54925	0.90718
Exosome complex exonuclease RRP44	Exosome complex exonuclease RRP44	DIS3	PR	0.000527481	0.00051456	0.00242604	0.06	neg	-0.50286	0.023828	0.2211		-0.36184	0.30422	0.99322		0.14566	0.68804	0.93425
H/ACA ribonucleoprotein complex subunit DKC1	H/ACA ribonucleoprotein complex subunit DKC1	DKC1	PR	0.162558	0.000160922	0.0016064	na	neg	-0.44768	0.047776	0.25932		-0.0942	0.79576	0.99861		0.27532	0.44135	0.90718
Dihydrolipoyllysine-residue acetyltransferase component of pyruvate dehydrogenase complex, mitochondrial	Dihydrolipoyllysine-residue acetyltransferase component of pyruvate dehydrogenase complex, mitochondrial	DLAT	PR	0.317488	0.000229633	0.00182206	na	neg	-0.47203	0.03561	0.24542		-0.11659	0.7484	0.99861		0.095175	0.79368	0.96153
DnaJ homolog subfamily A member 1	DnaJ homolog subfamily A member 1	DNAJA1	PR	0.267579	0.000618635	0.00228551	na	neg	-0.5418	0.013605	0.22195		-0.34722	0.32559	0.99861		0.33141	0.34956	0.90718
DnaJ homolog subfamily C member 13	DnaJ homolog subfamily C member 13	DNAJC13	PR	0.474138	0.0256741	0.0443462	na	neg	-0.47918	0.032541	0.2211		-0.30809	0.38646	0.99322		0.035823	0.92174	0.96906
DnaJ homolog subfamily C member 3	DnaJ homolog subfamily C member 3	DNAJC3	PR	0.345986	0.000328763	0.00146946	na	neg	-0.53843	0.014316	0.22493		-0.32266	0.36319	0.99861		0.23364	0.5159	0.90718
Dynamin-1-like protein	Dynamin-1-like protein	DNM1L	PR	0.39967	0.0024724	0.00667755	na	neg	-0.52302	0.017967	0.26544		-0.49855	0.14246	0.99946		0.18931	0.60041	0.91645
Dipeptidyl peptidase 3	Dipeptidyl peptidase 3	DPP3	PR	0.259717	0.000101312	0.000712927	na	neg	-0.44677	0.048284	0.25932		-0.063507	0.86164	0.99861		0.10292	0.77722	0.96153
Deoxyuridine 5'-triphosphate nucleotidohydrolase, mitochondrial	Deoxyuridine 5'-triphosphate nucleotidohydrolase, mitochondrial	DUT	PR	0.21176	5.29921e-05	0.000505353	na	neg	-0.5196	0.018871	0.24371		-0.32793	0.35495	0.99861		0.52071	0.12279	0.90718
Enhancer of mRNA-decapping protein 4	Enhancer of mRNA-decapping protein 4	EDC4	PR	0.000479667	0.00013173	0.00187244	0.02	neg	-0.5496	0.012065	0.19757		-0.28465	0.42538	0.99322		0.35148	0.31928	0.93425
Endothelial differentiation-related factor 1	Endothelial differentiation-related factor 1	EDF1	PR	0.369597	0.000266895	0.00129416	na	neg	-0.51285	0.020759	0.24371		-0.31229	0.37968	0.99861		0.50576	0.13586	0.90718
Eukaryotic translation elongation factor 1 epsilon-1	Eukaryotic translation elongation factor 1 epsilon-1	EEF1E1	PR	0.00128464	0.000281645	0.00187244	na	neg	-0.45982	0.041367	0.23229		-0.088319	0.8083	0.99322		0.18092	0.61694	0.93425
Elongation factor 1-gamma	Elongation factor 1-gamma	EEF1G	PR	0.51851	0.00329234	0.00832173	na	neg	-0.45157	0.045643	0.26544		-0.3004	0.39903	0.99946		0.426	0.21961	0.87144
EF-hand domain-containing protein D2	EF-hand domain-containing protein D2	EFHD2	PR	0.399115	2.73928e-05	0.000369604	na	neg	-0.49967	0.02488	0.26544		-0.21368	0.55334	0.99946		0.094781	0.79452	0.96212
Eukaryotic translation initiation factor 2A	Eukaryotic translation initiation factor 2A	EIF2A	PR	0.114567	0.00384598	0.0105106	0.66	neg	-0.52359	0.017822	0.21437		-0.25661	0.47419	0.99322		-0.1936	0.59203	0.93425
Eukaryotic translation initiation factor 2 subunit 1	Eukaryotic translation initiation factor 2 subunit 1	EIF2S1	PR	0.367525	0.000166531	0.000955074	na	neg	-0.45534	0.043648	0.26544		-0.16455	0.64965	0.99946		0.42217	0.22424	0.87144
Eukaryotic translation initiation factor 3 subunit C	Eukaryotic translation initiation factor 3 subunit C	EIF3C	PR	0.307623	0.000168596	0.000956679	na	neg	-0.48084	0.031858	0.24542		-0.20126	0.57715	0.99861		0.24252	0.4996	0.90718
Eukaryotic translation initiation factor 3 subunit K	Eukaryotic translation initiation factor 3 subunit K	EIF3K	PR	0.317919	0.000114363	0.000769297	na	neg	-0.47291	0.035219	0.24542		-0.19575	0.58783	0.99861		0.31532	0.37483	0.90718
Eukaryotic translation initiation factor 4 gamma 1	Eukaryotic translation initiation factor 4 gamma 1	EIF4G1	PR	0.228611	0.00140998	0.00510562	na	neg	-0.49501	0.026482	0.26544		-0.31252	0.37932	0.99946		0.3629	0.3027	0.87144
Eukaryotic translation initiation factor 4H	Eukaryotic translation initiation factor 4H	EIF4H	PR	0.324859	1.60775e-06	0.000140326	na	neg	-0.55959	0.010302	0.22195		-0.33257	0.34776	0.99861		0.089338	0.80612	0.96166
Echinoderm microtubule-associated protein-like 4	Echinoderm microtubule-associated protein-like 4	EML4	PR	0.38346	0.000875751	0.00295051	na	neg	-0.59183	0.0059796	0.20263		-0.4778	0.16251	0.99861		0.26593	0.45769	0.90718
Endoplasmic reticulum aminopeptidase 1	Endoplasmic reticulum aminopeptidase 1	ERAP1	PR	0.322605	0.000647701	0.00236474	na	neg	-0.49598	0.026143	0.26544		-0.21514	0.55057	0.99946		-0.27778	0.4371	0.90222
ERO1-like protein alpha	ERO1-like protein alpha	ERO1A	PR	0.200632	0.00058284	0.00242604	0.06	neg	-0.5689	0.008853	0.26544		-0.36234	0.30351	0.99946		0.35124	0.31965	0.87144
Eukaryotic peptide chain release factor subunit 1	Eukaryotic peptide chain release factor subunit 1	ETF1	PR	0.315055	9.64373e-06	0.000234217	na	neg	-0.55531	0.011029	0.22195		-0.31103	0.3817	0.99861		0.052064	0.88642	0.98776
Electron transfer flavoprotein subunit beta	Electron transfer flavoprotein subunit beta	ETFB	PR	0.523804	0.000216118	0.00113249	na	neg	-0.60027	0.0051372	0.26544		-0.43839	0.20505	0.99946		0.12315	0.73467	0.95583
Junctional adhesion molecule A	Junctional adhesion molecule A	F11R	PR	0.139458	0.00220222	0.00582462	na	neg	-0.53444	0.0152	0.21108		-0.34481	0.32918	0.99322		0.60457	0.064098	0.93425
Fumarylacetoacetase	Fumarylacetoacetase	FAH	PR	0.251332	0.00282727	0.00705051	na	neg	-0.50697	0.022525	0.24371		-0.23037	0.52198	0.99861		-0.25563	0.47594	0.90718
Protein FAM3C	Protein FAM3C	FAM3C	PR	0.461525	0.00566534	0.0129699	na	neg	-0.55377	0.011301	0.22195		-0.37825	0.28114	0.99861		0.10333	0.77637	0.96153
Flap endonuclease 1	Flap endonuclease 1	FEN1	PR	0.159093	0.00100798	0.00333564	na	neg	-0.55066	0.011867	0.22195		-0.35157	0.31916	0.99861		0.51691	0.12603	0.90718
Fermitin family homolog 3	Fermitin family homolog 3	FERMT3	PR	0.563705	0.0170027	0.0317862	na	neg	-0.46978	0.036622	0.26544		-0.29439	0.40899	0.99946		0.182	0.6148	0.91714
Fumarate hydratase, mitochondrial	Fumarate hydratase, mitochondrial	FH	PR	0.337478	3.54598e-06	0.000170732	na	neg	-0.44975	0.046634	0.26544		-0.023573	0.94846	0.99946		0.084206	0.8171	0.96763
Peptidyl-prolyl cis-trans isomerase FKBP3	Peptidyl-prolyl cis-trans isomerase FKBP3	FKBP3	PR	0.324752	8.64448e-06	0.000234217	na	neg	-0.53156	0.015863	0.23341		-0.29436	0.40904	0.99861		0.35637	0.31212	0.90718
Flotillin-1	Flotillin-1	FLOT1	PR	0.494595	0.00155711	0.00463154	na	neg	-0.50208	0.024082	0.24371		-0.32049	0.3666	0.99861		0.0038003	0.99169	0.9975
Synaptic functional regulator FMR1	Synaptic functional regulator FMR1	FMR1	PR	0.232228	0.0168245	0.0315163	na	neg	-0.47004	0.036502	0.22344		-0.29458	0.40867	0.99322		0.068661	0.85051	0.9493
Ketosamine-3-kinase	Ketosamine-3-kinase	FN3KRP	PR	0.499299	0.00110783	0.00351609	na	neg	-0.44517	0.049194	0.25932		-0.17148	0.63572	0.99861		-0.12345	0.73404	0.95944
Galactoside 3(4)-L-fucosyltransferase	Galactoside 3(4)-L-fucosyltransferase	FUT3	PR	0.00135038	0.0017452	0.00495359	0.06	neg	-0.52841	0.016614	0.21437		-0.52338	0.12054	0.99322		0.2107	0.55901	0.93425
Polypeptide N-acetylgalactosaminyltransferase 2	Polypeptide N-acetylgalactosaminyltransferase 2	GALNT2	PR	0.384166	0.0215981	0.0383494	na	neg	-0.52455	0.017576	0.21437		-0.43974	0.20349	0.99322		0.54391	0.10411	0.93425
Glutamate--cysteine ligase catalytic subunit	Glutamate--cysteine ligase catalytic subunit	GCLC	PR	0.353936	0.00210776	0.0059225	na	neg	-0.45155	0.045657	0.23229		-0.24493	0.49522	0.99322		0.16602	0.64668	0.93425
eIF-2-alpha kinase activator GCN1	eIF-2-alpha kinase activator GCN1	GCN1	PR	0.230834	2.88113e-05	0.000374453	na	neg	-0.45369	0.044513	0.26544		-0.13411	0.71186	0.99946		0.3504	0.32088	0.87144
Growth hormone-inducible transmembrane protein	Growth hormone-inducible transmembrane protein	GHITM	PR	0.133659	2.63269e-06	0.000164534	na	neg	-0.57321	0.0082408	0.19757		-0.35402	0.31556	0.99322		0.41593	0.23189	0.93425
PDZ domain-containing protein GIPC1	PDZ domain-containing protein GIPC1	GIPC1	PR	0.180881	9.45002e-06	0.000234217	na	neg	-0.46984	0.036591	0.22344		-0.15206	0.67495	0.99322		0.29033	0.41578	0.93425
Beta-galactosidase	Beta-galactosidase	GLB1	PR	0.399544	0.0274253	0.0469355	na	neg	-0.46491	0.038883	0.24542		-0.27123	0.44844	0.99861		-0.32877	0.35364	0.90718
Mannose-1-phosphate guanyltransferase beta	Mannose-1-phosphate guanyltransferase beta	GMPPB	PR	0.166412	0.00908243	0.0179029	na	neg	-0.54499	0.012957	0.22195		-0.36028	0.30646	0.99861		0.0036612	0.99199	0.9975
Aspartate aminotransferase, mitochondrial	Aspartate aminotransferase, mitochondrial	GOT2	PR	0.270325	5.7209e-05	0.00115786	0.02	neg	-0.45922	0.041668	0.26544		0.0075775	0.98343	0.99946		0.33499	0.34405	0.87566
Growth factor receptor-bound protein 2	Growth factor receptor-bound protein 2	GRB2	PR	0.548771	0.00210433	0.0059225	na	neg	-0.51404	0.020416	0.26544		-0.34667	0.32641	0.99946		0.063763	0.86108	0.97575
Glyoxylate reductase/hydroxypyruvate reductase	Glyoxylate reductase/hydroxypyruvate reductase	GRHPR	PR	0.553418	0.000403448	0.00167933	na	neg	-0.525	0.017461	0.23803		-0.34367	0.33091	0.99861		0.20505	0.56984	0.91234
GrpE protein homolog 1, mitochondrial	GrpE protein homolog 1, mitochondrial	GRPEL1	PR	0.000431706	0.000149393	0.00187244	0.06	neg	-0.44967	0.046675	0.23365		0.043938	0.90407	0.99322		0.23965	0.50484	0.93425
Glutathione S-transferase omega-1	Glutathione S-transferase omega-1	GSTO1	PR	0.686356	0.0136115	0.0261644	0.02	neg	-0.44437	0.049649	0.26544		-0.22069	0.54008	0.99946		-0.19946	0.58063	0.91645
Histone deacetylase 1	Histone deacetylase 1	HDAC1	PR	0.185629	2.31256e-05	0.000338166	na	neg	-0.57697	0.0077347	0.21328		-0.37942	0.27953	0.99861		0.28201	0.42988	0.90718
Histone deacetylase 2	Histone deacetylase 2	HDAC2	PR	0.0730075	0.00982206	0.0200387	na	neg	-0.60797	0.004457	0.20263		-0.52054	0.12294	0.99861		0.094089	0.79599	0.96153
Hepatoma-derived growth factor	Hepatoma-derived growth factor	HDGF	PR	0.353462	8.85331e-05	0.000666504	na	neg	-0.47456	0.034498	0.26544		-0.17169	0.6353	0.99946		0.28495	0.42487	0.90222
Hepatoma-derived growth factor-related protein 2	Hepatoma-derived growth factor-related protein 2	HDGFL2	PR	0.267794	0.000134661	0.000840128	na	neg	-0.55192	0.011635	0.19757		-0.3446	0.3295	0.99322		0.18808	0.60283	0.93425
Haloacid dehalogenase-like hydrolase domain-containing protein 3	Haloacid dehalogenase-like hydrolase domain-containing protein 3	HDHD3	PR	0.103869	0.000990375	0.00333564	na	neg	-0.51823	0.019243	0.2211		-0.28307	0.42806	0.99322		0.26048	0.46732	0.93425
Vigilin	Vigilin	HDLBP	PR	0.544619	0.0153497	0.0290655	na	neg	-0.47928	0.032498	0.26544		-0.25655	0.47429	0.99946		-0.15995	0.65892	0.93395
3-hydroxyisobutyryl-CoA hydrolase, mitochondrial	3-hydroxyisobutyryl-CoA hydrolase, mitochondrial	HIBCH	PR	0.549845	0.00938679	0.0193343	na	neg	-0.46964	0.036682	0.24542		-0.24515	0.49482	0.99861		-0.19519	0.58892	0.92036
HLA class II histocompatibility antigen, DP beta 1 chain	HLA class II histocompatibility antigen, DP beta 1 chain	HLA-DPB1	PR	0.00827199	0.000296925	0.00187244	na	neg	-0.59767	0.0053855	0.20263		-0.47914	0.16117	0.99861		0.45818	0.18296	0.90718
Minor histocompatibility antigen H13	Minor histocompatibility antigen H13	HM13	PR	0.306189	0.0011223	0.0035379	na	neg	-0.47854	0.032806	0.24542		-0.26091	0.46655	0.99861		0.42325	0.22293	0.90718
High mobility group protein B3	High mobility group protein B3	HMGB3	PR	0.000526856	0.000328789	0.00187244	0.02	neg	-0.47196	0.035642	0.22344		-0.12758	0.72541	0.99322		0.048471	0.89422	0.9612
Heterogeneous nuclear ribonucleoprotein F	Heterogeneous nuclear ribonucleoprotein F	HNRNPF	PR	0.302599	0.000146944	0.0015897	na	neg	-0.44989	0.046555	0.26544		-0.12172	0.73765	0.99946		0.46288	0.17793	0.87144
Heterogeneous nuclear ribonucleoprotein H3	Heterogeneous nuclear ribonucleoprotein H3	HNRNPH3	PR	0.370184	6.39295e-05	0.00055043	na	neg	-0.51667	0.019673	0.26544		-0.28588	0.42329	0.99946		0.43472	0.20931	0.87144
Heterogeneous nuclear ribonucleoprotein U-like protein 1	Heterogeneous nuclear ribonucleoprotein U-like protein 1	HNRNPUL1	PR	0.333963	0.000144957	0.000881283	na	neg	-0.48967	0.028416	0.26544		-0.26119	0.46605	0.99946		0.36544	0.29907	0.87144
Estradiol 17-beta-dehydrogenase 11	Estradiol 17-beta-dehydrogenase 11	HSD17B11	PR	0.330383	0.000329839	0.00187244	na	neg	-0.52568	0.01729	0.26544		-0.26939	0.45165	0.99946		-0.022794	0.95016	0.99428
Putative heat shock protein HSP 90-alpha A4	Putative heat shock protein HSP 90-alpha A4	HSP90AA4P	PR	0.12188	0.026309	0.043583	na	neg	-0.50644	0.022691	0.26544		-0.45831	0.18281	0.99946		0.01267	0.97229	0.99571
E3 ubiquitin-protein ligase HUWE1	E3 ubiquitin-protein ligase HUWE1	HUWE1	PR	0.301262	6.30362e-05	0.000548474	na	neg	-0.55511	0.011064	0.22195		-0.34763	0.32499	0.99861		0.30106	0.39794	0.90718
Hypoxia up-regulated protein 1	Hypoxia up-regulated protein 1	HYOU1	PR	0.424672	0.00281461	0.00742323	na	neg	-0.48379	0.030673	0.26544		-0.24062	0.50308	0.99946		0.051739	0.88712	0.97703
Isoleucine--tRNA ligase, mitochondrial	Isoleucine--tRNA ligase, mitochondrial	IARS2	PR	0.300047	0.000208571	0.00110581	na	neg	-0.44966	0.046682	0.26544		-0.13508	0.70984	0.99946		0.18951	0.60001	0.91645
Isocitrate dehydrogenase [NAD] subunit gamma, mitochondrial	Isocitrate dehydrogenase [NAD] subunit gamma, mitochondrial	IDH3G	PR	0.255925	0.000217944	0.0011374	na	neg	-0.57596	0.0078683	0.19757		-0.35571	0.31309	0.99322		-0.079166	0.82791	0.9467
Interferon-induced transmembrane protein 1	Interferon-induced transmembrane protein 1	IFITM1	PR	0.000310138	0.000149393	0.00187244	0.04	neg	-0.44461	0.049515	0.25932		0.0041397	0.99094	0.99861		0.30054	0.3988	0.90718
Interleukin enhancer-binding factor 3	Interleukin enhancer-binding factor 3	ILF3	PR	0.339803	0.000355081	0.00155445	na	neg	-0.45293	0.044916	0.26544		-0.21304	0.55456	0.99946		0.49791	0.14305	0.87144
Importin-5	Importin-5	IPO5	PR	0.31513	9.66322e-05	0.000702473	na	neg	-0.50289	0.02382	0.26544		-0.31214	0.37992	0.99946		0.44115	0.20187	0.87144
Importin-7	Importin-7	IPO7	PR	0.06678	0.0114588	0.0227466	na	neg	-0.44794	0.047634	0.26544		-0.19549	0.58834	0.99946		0.25539	0.47637	0.90225
Isochorismatase domain-containing protein 2	Isochorismatase domain-containing protein 2	ISOC2	PR	0.327306	0.000898015	0.00300378	na	neg	-0.47462	0.034472	0.2215		-0.2185	0.5442	0.99322		-0.20631	0.56742	0.93425
IST1 homolog	IST1 homolog	IST1	PR	0.460333	8.63762e-05	0.000653791	na	neg	-0.60028	0.0051369	0.20263		-0.41351	0.2349	0.99861		-0.0050922	0.98886	0.9975
Inosine triphosphate pyrophosphatase	Inosine triphosphate pyrophosphatase	ITPA	PR	0.181244	0.00220222	0.00582462	na	neg	-0.45939	0.041578	0.23229		-0.33419	0.34528	0.99322		0.06486	0.85871	0.9493
KH domain-containing, RNA-binding, signal transduction-associated protein 1	KH domain-containing, RNA-binding, signal transduction-associated protein 1	KHDRBS1	PR	0.262083	2.97632e-05	0.000374453	na	neg	-0.53181	0.015804	0.23341		-0.29732	0.40413	0.99861		0.28702	0.42136	0.90718
Far upstream element-binding protein 2	Far upstream element-binding protein 2	KHSRP	PR	0.213026	9.15321e-09	1.27825e-05	0.94	neg	-0.49787	0.025489	0.26544		-0.0568	0.87615	0.99946		0.23918	0.50571	0.90228
Kinectin	Kinectin	KTN1	PR	0.67141	0.00637497	0.0142785	na	neg	-0.49769	0.02555	0.26544		-0.35777	0.3101	0.99946		0.17853	0.62168	0.91897
Ragulator complex protein LAMTOR5	Ragulator complex protein LAMTOR5	LAMTOR5	PR	0.000313744	0.00517109	0.0117517	0.02	neg	-0.50618	0.02277	0.2211		-0.2796	0.43399	0.99322		0.20978	0.56077	0.93425
Cytosol aminopeptidase	Cytosol aminopeptidase	LAP3	PR	0.372163	0.000768539	0.00282438	na	neg	-0.44406	0.049828	0.26544		-0.16051	0.6578	0.99946		0.51495	0.12773	0.87144
Lethal(2) giant larvae protein homolog 2	Lethal(2) giant larvae protein homolog 2	LLGL2	PR	0.000527171	0.000565815	0.00242604	0.12	neg	-0.44458	0.04953	0.23824		-0.16712	0.64446	0.99322		0.29893	0.40146	0.93425
Lon protease homolog, mitochondrial	Lon protease homolog, mitochondrial	LONP1	PR	0.3385	0.00058284	0.00242604	na	neg	-0.55225	0.011575	0.22195		-0.41369	0.23467	0.99861		0.28211	0.4297	0.90718
Lysophosphatidylcholine acyltransferase 2	Lysophosphatidylcholine acyltransferase 2	LPCAT2	PR	0.186748	0.00318961	0.00814311	na	neg	-0.50115	0.024387	0.2211		-0.31113	0.38155	0.99322		0.095405	0.79319	0.93425
U6 snRNA-associated Sm-like protein LSm4	U6 snRNA-associated Sm-like protein LSm4	LSM4	PR	0.246027	4.55822e-07	9.79317e-05	na	neg	-0.48654	0.0296	0.24542		-0.16462	0.6495	0.99861		0.0038817	0.99151	0.9975
U6 snRNA-associated Sm-like protein LSm7	U6 snRNA-associated Sm-like protein LSm7	LSM7	PR	0.253816	0.00045339	0.0018273	na	neg	-0.61195	0.0041359	0.19757		-0.43875	0.20463	0.99322		-0.14801	0.68323	0.93425
Leukotriene A-4 hydrolase	Leukotriene A-4 hydrolase	LTA4H	PR	0.589089	0.00294634	0.00766928	na	neg	-0.55775	0.010609	0.26544		-0.49615	0.14469	0.99946		-0.022489	0.95083	0.99428
Cation-dependent mannose-6-phosphate receptor	Cation-dependent mannose-6-phosphate receptor	M6PR	PR	0.592425	0.0295447	0.0497999	na	neg	-0.57962	0.0073939	0.21328		-0.53623	0.11008	0.99861		0.15189	0.6753	0.94918
Protein mago nashi homolog	Protein mago nashi homolog	MAGOH	PR	0.242669	1.85698e-05	0.00029469	na	neg	-0.54093	0.013785	0.22195		-0.31846	0.36982	0.99861		0.23329	0.51656	0.90718
Dual specificity mitogen-activated protein kinase kinase 3	Dual specificity mitogen-activated protein kinase kinase 3	MAP2K3	PR	0.323491	4.8317e-05	0.000478544	na	neg	-0.60548	0.0046689	0.19757		-0.43261	0.21177	0.99322		-0.24939	0.48715	0.93425
Mitogen-activated protein kinase 3	Mitogen-activated protein kinase 3	MAPK3	PR	0.403628	0.0280491	0.0475659	na	neg	-0.45196	0.045436	0.25603		-0.26959	0.45129	0.99861		-0.445	0.1975	0.90718
Methylcrotonoyl-CoA carboxylase beta chain, mitochondrial	Methylcrotonoyl-CoA carboxylase beta chain, mitochondrial	MCCC2	PR	0.11823	0.0024503	0.0066508	na	neg	-0.48314	0.030932	0.24542		-0.1833	0.61223	0.99861		0.046216	0.89912	0.98855
DNA replication licensing factor MCM2	DNA replication licensing factor MCM2	MCM2	PR	0.0282585	0.00343247	0.0085827	na	neg	-0.47191	0.035663	0.24542		-0.11351	0.75488	0.99861		0.34459	0.32952	0.90718
DNA replication licensing factor MCM4	DNA replication licensing factor MCM4	MCM4	PR	0.177492	0.00149497	0.00448009	na	neg	-0.44597	0.048735	0.25932		-0.188	0.60298	0.99861		0.56755	0.087032	0.90718
NAD-dependent malic enzyme, mitochondrial	NAD-dependent malic enzyme, mitochondrial	ME2	PR	0.38092	0.000312149	0.00142909	0.4	neg	-0.51538	0.020037	0.24371		-0.27695	0.43855	0.99861		-0.16468	0.64938	0.94285
Microsomal glutathione S-transferase 1	Microsomal glutathione S-transferase 1	MGST1	PR	0.339438	0.000442358	0.00179319	na	neg	-0.61791	0.0036907	0.20263		-0.57235	0.083802	0.99861		-0.4066	0.24359	0.90718
MOB kinase activator 1B	MOB kinase activator 1B	MOB1B	PR	0.563872	0.00468852	0.0110881	na	neg	-0.49136	0.027794	0.24542		-0.28664	0.422	0.99861		-0.1918	0.59553	0.92272
39S ribosomal protein L1, mitochondrial	39S ribosomal protein L1, mitochondrial	MRPL1	PR	0.0369927	0.00908626	0.0188543	na	neg	-0.48372	0.030703	0.2211		-0.21826	0.54465	0.99322		0.3289	0.35343	0.93425
39S ribosomal protein L24, mitochondrial	39S ribosomal protein L24, mitochondrial	MRPL24	PR	0.000432108	0.00100548	0.00333564	0.22	neg	-0.57988	0.0073612	0.19757		-0.36184	0.30422	0.99322		-0.059428	0.87046	0.94974
39S ribosomal protein L4, mitochondrial	39S ribosomal protein L4, mitochondrial	MRPL4	PR	0.000781898	0.00123464	0.00397472	0.02	neg	-0.4948	0.026556	0.2211		-0.36184	0.30422	0.99322		0.17641	0.62589	0.93425
Protein LYRIC	Protein LYRIC	MTDH	PR	0.371515	0.0101037	0.0204936	na	neg	-0.46424	0.039202	0.24542		-0.32874	0.35368	0.99861		0.097164	0.78945	0.96153
Monofunctional C1-tetrahydrofolate synthase, mitochondrial	Monofunctional C1-tetrahydrofolate synthase, mitochondrial	MTHFD1L	PR	0.00101696	0.00486867	0.0110915	na	neg	-0.44379	0.049983	0.23909		-0.36184	0.30422	0.99322		-0.10617	0.77034	0.93425
Metaxin-2	Metaxin-2	MTX2	PR	0.450625	0.0125661	0.0245435	na	neg	-0.45116	0.045865	0.23229		-0.29223	0.4126	0.99322		0.37247	0.28917	0.93425
Mucin-13	Mucin-13	MUC13	PR	0.0230683	6.51818e-05	0.000556736	0.72	neg	-0.45009	0.046446	0.25782		0.091544	0.80142	0.99861		0.25795	0.4718	0.90718
c-Myc-binding protein	c-Myc-binding protein	MYCBP	PR	0.208845	3.27884e-05	0.000393038	na	neg	-0.54836	0.0123	0.19757		-0.30649	0.38906	0.99322		0.060164	0.86887	0.94974
Myosin-14	Myosin-14	MYH14	PR	0.325964	0.000534227	0.00204117	na	neg	-0.44604	0.048697	0.26544		-0.15577	0.66739	0.99946		0.26765	0.45469	0.90225
Unconventional myosin-If	Unconventional myosin-If	MYO1F	PR	0.179441	0.0255258	0.0426792	na	neg	-0.47409	0.034704	0.24542		-0.35877	0.30864	0.99861		0.40757	0.24236	0.90718
Sialic acid synthase	Sialic acid synthase	NANS	PR	0.325468	0.00170625	0.00484797	0.02	neg	-0.51529	0.020061	0.26544		-0.27203	0.44706	0.99946		-0.017602	0.96151	0.99428
Nuclear autoantigenic sperm protein	Nuclear autoantigenic sperm protein	NASP	PR	0.129298	0.00100798	0.00333564	na	neg	-0.60791	0.0044627	0.20263		-0.45952	0.18151	0.99861		0.32405	0.361	0.90718
Nuclear cap-binding protein subunit 1	Nuclear cap-binding protein subunit 1	NCBP1	PR	0.143956	9.32421e-05	0.000687138	0.04	neg	-0.55957	0.010305	0.22195		-0.36631	0.29783	0.99861		0.2049	0.57013	0.91234
NADH dehydrogenase [ubiquinone] 1 alpha subcomplex subunit 11	NADH dehydrogenase [ubiquinone] 1 alpha subcomplex subunit 11	NDUFA11	PR	0.205525	0.00838227	0.0190339	0.04	neg	-0.45117	0.04586	0.23229		-0.35691	0.31135	0.99322		-0.2498	0.48641	0.93425
NADH dehydrogenase [ubiquinone] 1 alpha subcomplex subunit 8	NADH dehydrogenase [ubiquinone] 1 alpha subcomplex subunit 8	NDUFA8	PR	0.343088	3.35992e-05	0.000395493	na	neg	-0.46967	0.036671	0.24542		-0.096919	0.78997	0.99861		-0.053349	0.88363	0.98776
NADH dehydrogenase [ubiquinone] 1 beta subcomplex subunit 8, mitochondrial	NADH dehydrogenase [ubiquinone] 1 beta subcomplex subunit 8, mitochondrial	NDUFB8	PR	0.187869	5.88208e-05	0.000540983	na	neg	-0.57354	0.0081952	0.19757		-0.34238	0.33284	0.99322		-0.27098	0.44887	0.93425
Nuclear factor NF-kappa-B p105 subunit	Nuclear factor NF-kappa-B p105 subunit	NFKB1	PR	0.00136561	0.000273846	0.00187244	na	neg	-0.5283	0.016641	0.21437		-0.33703	0.34094	0.99322		0.31878	0.36932	0.93425
Omega-amidase NIT2	Omega-amidase NIT2	NIT2	PR	0.31099	7.5723e-05	0.00127261	0.12	neg	-0.46811	0.037383	0.24542		-0.07911	0.82803	0.99861		0.35165	0.31904	0.90718
Putative nucleoside diphosphate kinase	Putative nucleoside diphosphate kinase	NME2P1	PR	0.262575	0.0253057	0.0439272	na	neg	-0.59434	0.0057177	0.26544		-0.59514	0.069511	0.99946		0.16865	0.6414	0.92453
Nucleoside diphosphate kinase 3	Nucleoside diphosphate kinase 3	NME3	PR	0.279141	0.000543389	0.00206769	na	neg	-0.48014	0.032147	0.2211		-0.22758	0.52717	0.99322		0.2562	0.47492	0.93425
Nucleolar protein 56	Nucleolar protein 56	NOP56	PR	0.217686	0.000843816	0.0037345	na	neg	-0.46817	0.037357	0.26544		-0.21651	0.54797	0.99946		0.50593	0.1357	0.87144
NAD(P)H dehydrogenase [quinone] 1	NAD(P)H dehydrogenase [quinone] 1	NQO1	PR	0.222861	0.00655446	0.0157004	na	neg	-0.51609	0.019836	0.2211		-0.32278	0.36301	0.99322		-0.26325	0.46242	0.93425
Sterol-4-alpha-carboxylate 3-dehydrogenase, decarboxylating	Sterol-4-alpha-carboxylate 3-dehydrogenase, decarboxylating	NSDHL	PR	0.093504	0.000149717	0.000903153	0.26	neg	-0.48648	0.029623	0.2211		-0.18852	0.60196	0.99322		0.27599	0.4402	0.93425
Vesicle-fusing ATPase	Vesicle-fusing ATPase	NSF	PR	0.509735	0.000704572	0.00250684	na	neg	-0.45422	0.044236	0.26544		-0.21019	0.55999	0.99946		0.49241	0.14822	0.87144
Cytosolic purine 5'-nucleotidase	Cytosolic purine 5'-nucleotidase	NT5C2	PR	0.267174	0.000433109	0.0017608	na	neg	-0.52591	0.017232	0.23803		-0.32898	0.35331	0.99861		0.25708	0.47336	0.90718
Cytosolic Fe-S cluster assembly factor NUBP1	Cytosolic Fe-S cluster assembly factor NUBP1	NUBP1	PR	0.20763	3.32632e-06	0.000170732	0.08	neg	-0.4823	0.031268	0.2211		-0.15021	0.67872	0.99322		0.15659	0.66574	0.93425
NudC domain-containing protein 1	NudC domain-containing protein 1	NUDCD1	PR	0.000406825	0.000151974	0.00187244	0.04	neg	-0.55102	0.011801	0.19757		-0.52684	0.11766	0.99322		0.56931	0.085836	0.93425
U8 snoRNA-decapping enzyme	U8 snoRNA-decapping enzyme	NUDT16	PR	0.00202627	0.00013173	0.00187244	0.84	neg	-0.55344	0.01136	0.19757		-0.24185	0.50083	0.99322		-0.06688	0.85435	0.9493
Cleavage and polyadenylation specificity factor subunit 5	Cleavage and polyadenylation specificity factor subunit 5	NUDT21	PR	0.612521	0.0128116	0.0248664	na	neg	-0.51766	0.019399	0.24371		-0.49826	0.14272	0.99861		0.37709	0.28275	0.90718
Nuclear pore complex protein Nup160	Nuclear pore complex protein Nup160	NUP160	PR	0.0679804	0.00129295	0.00397472	na	neg	-0.45185	0.045495	0.25603		-0.21958	0.54217	0.99861		0.42194	0.22452	0.90718
Nuclear pore membrane glycoprotein 210	Nuclear pore membrane glycoprotein 210	NUP210	PR	0.00094498	0.000328789	0.00187244	0.02	neg	-0.56468	0.0094869	0.19757		-0.26269	0.46341	0.99322		-0.4439	0.19875	0.93425
Nuclear transport factor 2	Nuclear transport factor 2	NUTF2	PR	0.443551	0.00335636	0.00844532	na	neg	-0.44482	0.049395	0.25932		-0.23119	0.52044	0.99861		-0.23899	0.50605	0.90718
OCIA domain-containing protein 1	OCIA domain-containing protein 1	OCIAD1	PR	0.29407	6.22206e-05	0.000546485	0.02	neg	-0.55471	0.011134	0.19757		-0.37843	0.2809	0.99322		0.086148	0.81294	0.94009
Osteoclast-stimulating factor 1	Osteoclast-stimulating factor 1	OSTF1	PR	0.371212	8.40776e-05	0.000643366	na	neg	-0.59371	0.0057825	0.20263		-0.40857	0.24109	0.99861		-0.023455	0.94872	0.9975
Ubiquitin thioesterase OTUB1	Ubiquitin thioesterase OTUB1	OTUB1	PR	0.46602	2.83226e-05	0.000374453	na	neg	-0.48126	0.031688	0.26544		-0.19372	0.59179	0.99946		0.28016	0.43303	0.90222
Polyadenylate-binding protein 1	Polyadenylate-binding protein 1	PABPC1	PR	0.252473	8.17256e-06	0.000230565	na	neg	-0.46595	0.038391	0.26544		-0.13314	0.71386	0.99946		0.47791	0.1624	0.87144
Polyadenylate-binding protein 4	Polyadenylate-binding protein 4	PABPC4	PR	0.170597	0.00356016	0.0085969	na	neg	-0.52621	0.017158	0.26544		-0.31178	0.38051	0.99946		0.20261	0.57454	0.91266
Platelet-activating factor acetylhydrolase IB subunit alpha	Platelet-activating factor acetylhydrolase IB subunit alpha	PAFAH1B1	PR	0.562168	0.00151516	0.00452604	na	neg	-0.47014	0.036456	0.26544		-0.22905	0.52443	0.99946		-0.094874	0.79432	0.96212
Serine/threonine-protein kinase PAK 2	Serine/threonine-protein kinase PAK 2	PAK2	PR	0.202267	1.7455e-05	0.00029469	na	neg	-0.51198	0.021014	0.24371		-0.26952	0.45142	0.99861		0.43254	0.21185	0.90718
Poly(rC)-binding protein 1	Poly(rC)-binding protein 1	PCBP1	PR	0.368844	4.97074e-06	0.000189158	na	neg	-0.44735	0.047961	0.26544		-0.038107	0.91676	0.99946		0.27509	0.44174	0.90222
Propionyl-CoA carboxylase alpha chain, mitochondrial	Propionyl-CoA carboxylase alpha chain, mitochondrial	PCCA	PR	0.281608	0.00630453	0.0141434	0.02	neg	-0.50432	0.023359	0.24371		-0.31639	0.37311	0.99861		-0.44716	0.19508	0.90718
PEST proteolytic signal-containing nuclear protein	PEST proteolytic signal-containing nuclear protein	PCNP	PR	0.275379	0.000194608	0.00105542	na	neg	-0.49783	0.025502	0.24371		-0.25057	0.48502	0.99861		0.2039	0.57206	0.91234
Pyruvate dehydrogenase E1 component subunit beta, mitochondrial	Pyruvate dehydrogenase E1 component subunit beta, mitochondrial	PDHB	PR	0.283693	0.000221705	0.00115097	na	neg	-0.48077	0.031889	0.26544		-0.21187	0.55679	0.99946		0.26455	0.46013	0.90225
Protein disulfide-isomerase A4	Protein disulfide-isomerase A4	PDIA4	PR	0.529603	0.0146244	0.0279003	na	neg	-0.48545	0.030023	0.26544		-0.2562	0.47492	0.99946		-0.18868	0.60165	0.91645
Prefoldin subunit 2	Prefoldin subunit 2	PFDN2	PR	0.412269	3.66551e-05	0.00041197	0.02	neg	-0.57344	0.0082084	0.21328		-0.3718	0.2901	0.99861		0.11539	0.75091	0.96153
Prefoldin subunit 5	Prefoldin subunit 5	PFDN5	PR	0.293462	0.000475066	0.00187945	na	neg	-0.45416	0.044265	0.25603		-0.19355	0.59212	0.99861		0.2426	0.49947	0.90718
Serine/threonine-protein phosphatase PGAM5, mitochondrial	Serine/threonine-protein phosphatase PGAM5, mitochondrial	PGAM5	PR	0.16875	0.000227307	0.00116276	na	neg	-0.55223	0.011578	0.19757		-0.38435	0.27282	0.99322		0.5228	0.12103	0.93425
Phosphoglycerate kinase 1	Phosphoglycerate kinase 1	PGK1	PR	0.499563	0.000128656	0.000824164	na	neg	-0.45589	0.043364	0.26544		-0.090255	0.80417	0.99946		-0.15649	0.66593	0.93575
Phosphoglucomutase-2	Phosphoglucomutase-2	PGM2	PR	0.519213	0.000100063	0.000712927	na	neg	-0.48181	0.031465	0.26544		-0.22595	0.53021	0.99946		0.22955	0.5235	0.90885
Membrane-associated progesterone receptor component 2	Membrane-associated progesterone receptor component 2	PGRMC2	PR	0.485641	0.00220222	0.00582462	na	neg	-0.45556	0.043535	0.25603		-0.17547	0.62775	0.99861		0.21849	0.54422	0.90718
Prohibitin	Prohibitin	PHB1	PR	0.354285	9.12986e-06	0.000234217	na	neg	-0.45064	0.046147	0.26544		-0.011067	0.97579	0.99946		0.35324	0.3167	0.87144
Peptidyl-prolyl cis-trans isomerase NIMA-interacting 4	Peptidyl-prolyl cis-trans isomerase NIMA-interacting 4	PIN4	PR	0.160002	0.00011254	0.000762942	0.04	neg	-0.47118	0.035988	0.22344		-0.14351	0.69246	0.99322		0.13906	0.70163	0.93425
Pleiotropic regulator 1	Pleiotropic regulator 1	PLRG1	PR	0.00130312	0.00134917	0.00406935	na	neg	-0.46736	0.037734	0.22562		-0.2235	0.53479	0.99322		0.37385	0.28724	0.93425
Pinin	Pinin	PNN	PR	0.000760972	8.74e-05	0.00187244	0.56	neg	-0.52411	0.017686	0.21437		-0.36184	0.30422	0.99322		0.4947	0.14606	0.93425
Purine nucleoside phosphorylase	Purine nucleoside phosphorylase	PNP	PR	0.409316	0.00016548	0.000954931	na	neg	-0.52882	0.016515	0.26544		-0.32289	0.36282	0.99946		0.30124	0.39765	0.89588
Pyridoxine-5'-phosphate oxidase	Pyridoxine-5'-phosphate oxidase	PNPO	PR	0.183477	2.97032e-05	0.000374453	na	neg	-0.49003	0.028285	0.2211		-0.20493	0.57007	0.99322		0.2782	0.4364	0.93425
Polyribonucleotide nucleotidyltransferase 1, mitochondrial	Polyribonucleotide nucleotidyltransferase 1, mitochondrial	PNPT1	PR	0.000322382	0.000110671	0.00187244	0.76	neg	-0.46188	0.040349	0.23229		0.043215	0.90564	0.99322		0.18409	0.61068	0.93425
GDP-fucose protein O-fucosyltransferase 1	GDP-fucose protein O-fucosyltransferase 1	POFUT1	PR	0.120387	7.06909e-07	0.000116141	0.02	neg	-0.61898	0.0036158	0.19757		-0.47873	0.16158	0.99322		0.35111	0.31983	0.93425
DNA-directed RNA polymerases I, II, and III subunit RPABC3	DNA-directed RNA polymerases I, II, and III subunit RPABC3	POLR2H	PR	0.0773773	5.24466e-05	0.000505233	0.04	neg	-0.64174	0.0022872	0.17902		-0.54864	0.10053	0.99322		0.53444	0.1115	0.93425
Phosphopantothenate--cysteine ligase	Phosphopantothenate--cysteine ligase	PPCS	PR	0.109838	0.000195066	0.00170256	0.3	neg	-0.55892	0.010413	0.19757		-0.27617	0.43988	0.99322		-0.16037	0.65808	0.93425
Peptidyl-prolyl cis-trans isomerase A	Peptidyl-prolyl cis-trans isomerase A	PPIA	PR	0.413526	4.29132e-06	0.000175647	0.02	neg	-0.44511	0.049228	0.26544		0.056806	0.87614	0.99946		0.10298	0.7771	0.95976
Peptidyl-prolyl cis-trans isomerase F, mitochondrial	Peptidyl-prolyl cis-trans isomerase F, mitochondrial	PPIF	PR	0.178452	1.36336e-05	0.000275932	na	neg	-0.52727	0.016893	0.23803		-0.26082	0.46671	0.99861		0.17305	0.63258	0.94285
Peptidyl-prolyl cis-trans isomerase H	Peptidyl-prolyl cis-trans isomerase H	PPIH	PR	0.245607	6.71609e-08	4.06714e-05	0.02	neg	-0.63042	0.0028848	0.20263		-0.4599	0.18111	0.99861		0.53795	0.10873	0.90718
Nuclear inhibitor of protein phosphatase 1	Nuclear inhibitor of protein phosphatase 1	PPP1R8	PR	0.290223	0.0203918	0.0366265	na	neg	-0.50438	0.023341	0.2211		-0.485	0.15538	0.99322		0.050873	0.889	0.95844
Serine/threonine-protein phosphatase 5	Serine/threonine-protein phosphatase 5	PPP5C	PR	0.282498	0.000381112	0.00162495	na	neg	-0.54147	0.013673	0.22195		-0.36106	0.30534	0.99861		0.33883	0.3382	0.90718
Peroxiredoxin-5, mitochondrial	Peroxiredoxin-5, mitochondrial	PRDX5	PR	0.196717	0.000404235	0.0016801	na	neg	-0.47352	0.034952	0.26544		-0.06866	0.85051	0.99946		-0.19544	0.58844	0.91645
Pre-mRNA-processing factor 19	Pre-mRNA-processing factor 19	PRPF19	PR	0.449457	0.000781915	0.00271291	na	neg	-0.46475	0.038962	0.26544		-0.37391	0.28715	0.99946		0.40779	0.24209	0.87144
Serine/threonine-protein kinase PRP4 homolog	Serine/threonine-protein kinase PRP4 homolog	PRPF4B	PR	0.313478	0.0109716	0.0218677	na	neg	-0.47715	0.033392	0.2215		-0.38651	0.26989	0.99322		0.26653	0.45665	0.93425
Ribose-phosphate pyrophosphokinase 2	Ribose-phosphate pyrophosphokinase 2	PRPS2	PR	0.186038	7.38227e-10	2.06187e-06	0.74	neg	-0.60366	0.0048284	0.20263		-0.36191	0.30412	0.99861		-0.18012	0.61853	0.9349
Phosphoribosyl pyrophosphate synthase-associated protein 2	Phosphoribosyl pyrophosphate synthase-associated protein 2	PRPSAP2	PR	0.0326417	0.000296925	0.00187244	0.34	neg	-0.52802	0.01671	0.21437		-0.25278	0.48105	0.99322		-0.068129	0.85166	0.9493
Protein PRRC1	Protein PRRC1	PRRC1	PR	0.483766	0.00798125	0.0170948	na	neg	-0.46161	0.040479	0.23229		-0.26339	0.46217	0.99322		-0.10811	0.76626	0.93425
Peroxiredoxin-like 2A	Peroxiredoxin-like 2A	PRXL2A	PR	0.204071	3.44316e-05	0.000395493	na	neg	-0.46174	0.040418	0.23229		-0.17338	0.63192	0.99322		0.40901	0.24055	0.93425
PC4 and SFRS1-interacting protein	PC4 and SFRS1-interacting protein	PSIP1	PR	0.183313	4.0315e-06	0.000173179	na	neg	-0.48337	0.03084	0.24542		-0.16046	0.6579	0.99861		0.47531	0.16503	0.90718
Proteasome subunit beta type-3	Proteasome subunit beta type-3	PSMB3	PR	0.381061	3.86118e-05	0.000419622	na	neg	-0.49367	0.026958	0.26544		-0.20443	0.57103	0.99946		0.091307	0.80192	0.96705
Proteasome subunit beta type-4	Proteasome subunit beta type-4	PSMB4	PR	0.285346	6.42368e-05	0.00055043	na	neg	-0.45834	0.042108	0.26544		-0.16225	0.65427	0.99946		0.40573	0.2447	0.87144
26S proteasome regulatory subunit 6B	26S proteasome regulatory subunit 6B	PSMC4	PR	0.372925	0.000101334	0.000712927	na	neg	-0.49983	0.024826	0.26544		-0.21511	0.55062	0.99946		0.1163	0.74901	0.95802
26S proteasome non-ATPase regulatory subunit 1	26S proteasome non-ATPase regulatory subunit 1	PSMD1	PR	0.347473	7.22589e-05	0.000581611	na	neg	-0.47468	0.034445	0.26544		-0.23313	0.51685	0.99946		0.49367	0.14703	0.87144
26S proteasome non-ATPase regulatory subunit 12	26S proteasome non-ATPase regulatory subunit 12	PSMD12	PR	0.235724	0.000329839	0.00187244	0.04	neg	-0.45377	0.044472	0.25603		-0.11373	0.75441	0.99861		0.29529	0.4075	0.90718
26S proteasome non-ATPase regulatory subunit 6	26S proteasome non-ATPase regulatory subunit 6	PSMD6	PR	0.307778	4.0499e-06	0.000173179	na	neg	-0.47876	0.032717	0.24542		-0.13697	0.70593	0.99861		0.27889	0.4352	0.90718
26S proteasome non-ATPase regulatory subunit 7	26S proteasome non-ATPase regulatory subunit 7	PSMD7	PR	0.591634	0.0123559	0.0242176	na	neg	-0.47632	0.033742	0.26544		-0.37076	0.29155	0.99946		0.40382	0.24714	0.87144
Proteasome activator complex subunit 3	Proteasome activator complex subunit 3	PSME3	PR	0.100247	0.000838993	0.00371954	na	neg	-0.4678	0.037528	0.24542		-0.15588	0.66717	0.99861		0.35191	0.31865	0.90718
Paraspeckle component 1	Paraspeckle component 1	PSPC1	PR	0.139119	1.30395e-07	4.55243e-05	na	neg	-0.48963	0.028431	0.2211		-0.13024	0.71988	0.99322		-0.2319	0.51914	0.93425
Polypyrimidine tract-binding protein 3	Polypyrimidine tract-binding protein 3	PTBP3	PR	0.125911	0.00238934	0.00653907	na	neg	-0.48701	0.029422	0.24542		-0.28425	0.42606	0.99861		0.42864	0.21646	0.90718
Prostaglandin E synthase 2	Prostaglandin E synthase 2	PTGES2	PR	0.243343	8.40973e-07	0.000123673	0.42	neg	-0.51485	0.020186	0.24371		-0.28098	0.43162	0.99861		0.39657	0.25655	0.90718
Pseudouridine-5'-phosphatase	Pseudouridine-5'-phosphatase	PUDP	PR	0.204131	0.0011375	0.00357371	na	neg	-0.66884	0.0012623	0.14735		-0.56028	0.092074	0.99322		0.1139	0.75406	0.93425
Pyrroline-5-carboxylate reductase 1, mitochondrial	Pyrroline-5-carboxylate reductase 1, mitochondrial	PYCR1	PR	0.150063	8.61801e-05	0.000653791	na	neg	-0.5334	0.015437	0.23341		-0.37619	0.28398	0.99861		0.51481	0.12785	0.90718
Pyrroline-5-carboxylate reductase 2	Pyrroline-5-carboxylate reductase 2	PYCR2	PR	0.00185809	0.00966977	0.0189927	na	neg	-0.49203	0.027549	0.2211		-0.42017	0.22668	0.99322		0.2269	0.52844	0.93425
Glutamine--tRNA ligase	Glutamine--tRNA ligase	QARS1	PR	0.347151	6.56335e-05	0.000558886	na	neg	-0.51022	0.021535	0.26544		-0.2861	0.42292	0.99946		0.37399	0.28704	0.87144
Nicotinate-nucleotide pyrophosphorylase [carboxylating]	Nicotinate-nucleotide pyrophosphorylase [carboxylating]	QPRT	PR	0.391812	0.0113297	0.0214389	na	neg	-0.5061	0.022796	0.24371		-0.43533	0.20859	0.99861		0.45614	0.18516	0.90718
Ras-related protein Rab-18	Ras-related protein Rab-18	RAB18	PR	0.275678	0.000215772	0.00113249	na	neg	-0.54191	0.013583	0.19821		-0.33274	0.34751	0.99322		0.22444	0.53302	0.93425
Ras-related protein Rab-2A	Ras-related protein Rab-2A	RAB2A	PR	0.224849	1.93336e-05	0.000302394	na	neg	-0.51462	0.02025	0.26544		-0.19234	0.59449	0.99946		-0.019242	0.95792	0.99428
Ras-related protein Rab-5A	Ras-related protein Rab-5A	RAB5A	PR	0.00368298	0.0120668	0.0228184	na	neg	-0.59051	0.0061203	0.20263		-0.49857	0.14244	0.99861		-0.42977	0.21512	0.90718
Ras-related protein Rab-7a	Ras-related protein Rab-7a	RAB7A	PR	0.545437	0.00103867	0.00334989	na	neg	-0.46302	0.039792	0.26544		-0.24091	0.50255	0.99946		0.33983	0.33669	0.87144
Ras-related C3 botulinum toxin substrate 2	Ras-related C3 botulinum toxin substrate 2	RAC2	PR	0.495437	0.00157801	0.00467875	na	neg	-0.47571	0.034001	0.26544		-0.2946	0.40865	0.99946		0.45755	0.18364	0.87144
Ras-related protein Ral-B	Ras-related protein Ral-B	RALB	PR	0.521616	0.00955856	0.0196217	na	neg	-0.47878	0.032705	0.24542		-0.31965	0.36793	0.99861		0.25806	0.47162	0.90718
Ribonucleoprotein PTB-binding 1	Ribonucleoprotein PTB-binding 1	RAVER1	PR	0.0849456	0.000672684	0.00241803	0.1	neg	-0.46093	0.040816	0.23229		-0.12185	0.73738	0.99322		0.52354	0.1204	0.93425
RNA-binding protein 39	RNA-binding protein 39	RBM39	PR	0.306098	0.000250305	0.00124617	na	neg	-0.48749	0.029236	0.24542		-0.28223	0.42949	0.99861		0.53288	0.11275	0.90718
RNA-binding protein 47	RNA-binding protein 47	RBM47	PR	0.00134953	0.000379666	0.00214907	0.12	neg	-0.47114	0.036005	0.22344		-0.36184	0.30422	0.99322		0.20945	0.56141	0.93425
RNA-binding protein 8A	RNA-binding protein 8A	RBM8A	PR	0.126387	7.63819e-05	0.000600942	na	neg	-0.62971	0.0029261	0.20263		-0.52193	0.12176	0.99861		0.48782	0.15263	0.90718
RNA-binding motif protein, X chromosome	RNA-binding motif protein, X chromosome	RBMX	PR	0.334004	1.31158e-05	0.000271351	na	neg	-0.5296	0.016328	0.26544		-0.29549	0.40716	0.99946		0.38167	0.27646	0.87144
Protein RCC2	Protein RCC2	RCC2	PR	0.0677867	2.16867e-05	0.000323909	na	neg	-0.48926	0.028572	0.26544		-0.10541	0.77195	0.99946		0.39517	0.25838	0.87144
Raftlin	Raftlin	RFTN1	PR	0.250027	8.37415e-05	0.000643366	na	neg	-0.4592	0.041675	0.23229		-0.13747	0.70491	0.99322		-0.18941	0.60022	0.93425
Synembryn-A	Synembryn-A	RIC8A	PR	0.259002	0.000663114	0.00239596	na	neg	-0.60137	0.0050358	0.19757		-0.46754	0.17303	0.99322		0.27825	0.43631	0.93425
E3 ubiquitin-protein ligase RNF114	E3 ubiquitin-protein ligase RNF114	RNF114	PR	0.0570473	0.00045647	0.00183706	na	neg	-0.66347	0.0014267	0.14735		-0.52617	0.11822	0.99322		0.14471	0.68999	0.93425
E3 ubiquitin-protein ligase RNF213	E3 ubiquitin-protein ligase RNF213	RNF213	PR	0.442224	0.000246128	0.00187244	na	neg	-0.45122	0.045834	0.25603		-0.41228	0.23643	0.99861		0.38043	0.27816	0.90718
Replication protein A 32 kDa subunit	Replication protein A 32 kDa subunit	RPA2	PR	0.285362	0.000114259	0.000769297	na	neg	-0.5111	0.021273	0.2211		-0.22859	0.52528	0.99322		-0.2804	0.43261	0.93425
Ribulose-phosphate 3-epimerase	Ribulose-phosphate 3-epimerase	RPE	PR	0.341198	0.000131453	0.000830434	0.06	neg	-0.62338	0.0033184	0.20263		-0.62963	0.051083	0.99861		0.50993	0.13213	0.90718
60S ribosomal protein L10	60S ribosomal protein L10	RPL10	PR	0.330085	0.000387022	0.00164278	na	neg	-0.48695	0.029444	0.26544		-0.31039	0.38274	0.99946		0.53212	0.11336	0.87144
60S ribosomal protein L12	60S ribosomal protein L12	RPL12	PR	0.39042	6.08579e-05	0.000540983	na	neg	-0.45769	0.042437	0.26544		-0.15546	0.66804	0.99946		0.28084	0.43186	0.90222
60S ribosomal protein L18	60S ribosomal protein L18	RPL18	PR	0.385552	0.00106971	0.00340673	na	neg	-0.45498	0.043834	0.26544		-0.27306	0.44527	0.99946		0.41651	0.23118	0.87144
60S ribosomal protein L21	60S ribosomal protein L21	RPL21	PR	0.187575	2.95947e-05	0.000374453	na	neg	-0.47419	0.034658	0.24542		-0.20716	0.56578	0.99861		0.5755	0.081724	0.90718
60S ribosomal protein L35a	60S ribosomal protein L35a	RPL35A	PR	0.458241	0.00165762	0.00486828	na	neg	-0.5095	0.021752	0.24371		-0.30856	0.3857	0.99861		0.1072	0.76817	0.96153
40S ribosomal protein S21	40S ribosomal protein S21	RPS21	PR	0.209086	0.00058284	0.00242604	0.02	neg	-0.59766	0.0053865	0.20263		-0.40622	0.24407	0.99861		0.25573	0.47577	0.90718
Ribosomal protein S6 kinase alpha-3	Ribosomal protein S6 kinase alpha-3	RPS6KA3	PR	0.446514	0.000351447	0.00154498	na	neg	-0.48955	0.028462	0.24542		-0.25848	0.47086	0.99861		0.1632	0.65235	0.94285
RNA 3'-terminal phosphate cyclase	RNA 3'-terminal phosphate cyclase	RTCA	PR	0.409818	0.00237077	0.00649811	na	neg	-0.56794	0.0089943	0.19757		-0.46334	0.17744	0.99322		0.16028	0.65825	0.93425
RuvB-like 1	RuvB-like 1	RUVBL1	PR	0.241262	4.53513e-05	0.000457278	na	neg	-0.49129	0.027819	0.26544		-0.21728	0.54652	0.99946		0.39386	0.2601	0.87144
Phosphatidylinositide phosphatase SAC1	Phosphatidylinositide phosphatase SAC1	SACM1L	PR	0.300447	0.000159851	0.000941909	na	neg	-0.57576	0.0078953	0.21328		-0.36298	0.30259	0.99861		0.16866	0.64137	0.94285
Scaffold attachment factor B1	Scaffold attachment factor B1	SAFB	PR	0.166963	0.000403425	0.00240906	na	neg	-0.50084	0.024492	0.24371		-0.25331	0.48009	0.99861		0.46289	0.17792	0.90718
U4/U6.U5 tri-snRNP-associated protein 1	U4/U6.U5 tri-snRNP-associated protein 1	SART1	PR	0.175442	0.000920688	0.00305765	na	neg	-0.50974	0.02168	0.2211		-0.50507	0.13649	0.99322		0.40227	0.24914	0.93425
Secretory carrier-associated membrane protein 3	Secretory carrier-associated membrane protein 3	SCAMP3	PR	0.000415721	0.000588152	0.00244087	0.08	neg	-0.55645	0.010831	0.19757		-0.38788	0.26806	0.99322		0.40639	0.24387	0.93425
Sec1 family domain-containing protein 1	Sec1 family domain-containing protein 1	SCFD1	PR	0.479866	0.0207119	0.0370348	na	neg	-0.48479	0.030281	0.24542		-0.28745	0.42064	0.99861		-0.013005	0.97156	0.9975
Succinate dehydrogenase [ubiquinone] flavoprotein subunit, mitochondrial	Succinate dehydrogenase [ubiquinone] flavoprotein subunit, mitochondrial	SDHA	PR	0.518255	2.14139e-06	0.000161646	na	neg	-0.52219	0.018183	0.26544		-0.25031	0.48549	0.99946		0.24453	0.49595	0.90225
Signal peptidase complex catalytic subunit SEC11A	Signal peptidase complex catalytic subunit SEC11A	SEC11A	PR	0.588197	0.00191086	0.00549079	na	neg	-0.47687	0.033507	0.2215		-0.29059	0.41534	0.99322		0.34337	0.33135	0.93425
Protein transport protein Sec24C	Protein transport protein Sec24C	SEC24C	PR	0.35977	0.000130663	0.000830434	na	neg	-0.46854	0.037185	0.24542		-0.16585	0.64702	0.99861		0.23743	0.50892	0.90718
Protein transport protein Sec61 subunit beta	Protein transport protein Sec61 subunit beta	SEC61B	PR	0.531934	0.00909376	0.0188559	na	neg	-0.48371	0.030705	0.24542		-0.30577	0.39023	0.99861		0.15555	0.66785	0.94918
Splicing factor 3A subunit 3	Splicing factor 3A subunit 3	SF3A3	PR	0.383659	0.000227264	0.00116276	na	neg	-0.54437	0.01308	0.22195		-0.41258	0.23606	0.99861		0.38233	0.27556	0.90718
Splicing factor 3B subunit 2	Splicing factor 3B subunit 2	SF3B2	PR	0.254701	3.31039e-05	0.00039406	na	neg	-0.55811	0.010548	0.26544		-0.36642	0.29768	0.99946		0.23974	0.50469	0.90228
Small glutamine-rich tetratricopeptide repeat-containing protein alpha	Small glutamine-rich tetratricopeptide repeat-containing protein alpha	SGTA	PR	0.393691	0.00298975	0.007739	na	neg	-0.49791	0.025476	0.24371		-0.48534	0.15504	0.99861		0.53264	0.11294	0.90718
Serine hydroxymethyltransferase, mitochondrial	Serine hydroxymethyltransferase, mitochondrial	SHMT2	PR	0.16312	2.94849e-05	0.000374453	na	neg	-0.52636	0.017121	0.26544		-0.30194	0.39651	0.99946		0.4844	0.15596	0.87144
Sialate O-acetylesterase	Sialate O-acetylesterase	SIAE	PR	0.116094	0.000114582	0.000769297	na	neg	-0.45725	0.042664	0.23229		-0.033122	0.92763	0.99479		-0.46559	0.17507	0.93425
Paired amphipathic helix protein Sin3a	Paired amphipathic helix protein Sin3a	SIN3A	PR	0.00143502	0.000927898	0.00333564	0.28	neg	-0.54437	0.01308	0.19757		-0.36184	0.30422	0.99322		-0.20438	0.57114	0.93425
Neutral amino acid transporter B(0)	Neutral amino acid transporter B(0)	SLC1A5	PR	0.269622	0.00282727	0.00705051	na	neg	-0.47989	0.032249	0.24542		-0.32834	0.3543	0.99861		0.3874	0.2687	0.90718
Tricarboxylate transport protein, mitochondrial	Tricarboxylate transport protein, mitochondrial	SLC25A1	PR	0.320566	3.32969e-05	0.00039406	na	neg	-0.48872	0.028771	0.24542		-0.22045	0.54052	0.99861		0.3569	0.31135	0.90718
Mitochondrial dicarboxylate carrier	Mitochondrial dicarboxylate carrier	SLC25A10	PR	0.0796812	0.000298443	0.00138925	na	neg	-0.59459	0.0056928	0.19757		-0.40831	0.24143	0.99322		0.15547	0.66801	0.93425
Mitochondrial carnitine/acylcarnitine carrier protein	Mitochondrial carnitine/acylcarnitine carrier protein	SLC25A20	PR	0.381499	0.0174463	0.0324086	na	neg	-0.45526	0.043692	0.23229		-0.249	0.48784	0.99322		-0.3304	0.35112	0.93425
Calcium-binding mitochondrial carrier protein SCaMC-1	Calcium-binding mitochondrial carrier protein SCaMC-1	SLC25A24	PR	0.363019	3.73714e-05	0.000415069	na	neg	-0.4788	0.0327	0.26544		-0.13333	0.71347	0.99946		-0.16504	0.64866	0.92597
Na(+)/H(+) exchange regulatory cofactor NHE-RF1	Na(+)/H(+) exchange regulatory cofactor NHE-RF1	SLC9A3R1	PR	0.559678	0.00446571	0.0106767	na	neg	-0.5933	0.0058245	0.20263		-0.46474	0.17597	0.99861		0.016689	0.9635	0.9975
U5 small nuclear ribonucleoprotein 200 kDa helicase	U5 small nuclear ribonucleoprotein 200 kDa helicase	SNRNP200	PR	0.317521	0.000129521	0.000827807	na	neg	-0.46271	0.03994	0.26544		-0.2072	0.56571	0.99946		0.41165	0.23722	0.87144
U2 small nuclear ribonucleoprotein A'	U2 small nuclear ribonucleoprotein A'	SNRPA1	PR	0.131632	5.2505e-05	0.00115219	na	neg	-0.57967	0.0073876	0.21328		-0.3774	0.28231	0.99861		0.60471	0.064025	0.90718
Small nuclear ribonucleoprotein Sm D2	Small nuclear ribonucleoprotein Sm D2	SNRPD2	PR	0.346998	3.45448e-05	0.000395493	na	neg	-0.47018	0.036437	0.26544		-0.15927	0.66029	0.99946		0.27117	0.44855	0.90222
Sorting nexin-12	Sorting nexin-12	SNX12	PR	0.555012	0.0212894	0.0379702	na	neg	-0.4957	0.02624	0.2211		-0.37436	0.28652	0.99322		0.35486	0.31433	0.93425
Sorting nexin-3	Sorting nexin-3	SNX3	PR	0.538136	0.00223886	0.00619121	na	neg	-0.44856	0.047286	0.25932		-0.27239	0.44642	0.99861		0.49041	0.15013	0.90718
Sequestosome-1	Sequestosome-1	SQSTM1	PR	0.0625887	0.000555458	0.00242604	na	neg	-0.54618	0.012721	0.19757		-0.41659	0.23107	0.99322		0.55879	0.093134	0.93425
Signal recognition particle 14 kDa protein	Signal recognition particle 14 kDa protein	SRP14	PR	0.41533	0.00295767	0.00769158	na	neg	-0.44577	0.048853	0.25932		-0.32702	0.35635	0.99861		0.53136	0.11397	0.90718
Signal recognition particle 9 kDa protein	Signal recognition particle 9 kDa protein	SRP9	PR	0.287618	5.54331e-06	0.000189158	na	neg	-0.44937	0.046842	0.25847		-0.10385	0.77526	0.99861		0.38248	0.27535	0.90718
Serrate RNA effector molecule homolog	Serrate RNA effector molecule homolog	SRRT	PR	0.169307	0.000244449	0.00187487	na	neg	-0.56232	0.0098583	0.22195		-0.38817	0.26767	0.99861		0.33558	0.34315	0.90718
Serine/arginine-rich splicing factor 1	Serine/arginine-rich splicing factor 1	SRSF1	PR	0.259856	6.50719e-06	0.000195426	0.02	neg	-0.49168	0.027675	0.26544		-0.17064	0.6374	0.99946		0.32893	0.35339	0.88624
Serine/arginine-rich splicing factor 11	Serine/arginine-rich splicing factor 11	SRSF11	PR	0.0934012	3.66207e-07	8.64476e-05	na	neg	-0.55795	0.010576	0.19757		-0.3164	0.37309	0.99322		0.46334	0.17744	0.93425
Serine/arginine-rich splicing factor 6	Serine/arginine-rich splicing factor 6	SRSF6	PR	0.284413	7.08292e-05	0.000579679	na	neg	-0.4655	0.038605	0.24542		-0.19753	0.58438	0.99861		0.54836	0.10074	0.90718
Signal transducer and activator of transcription 5A	Signal transducer and activator of transcription 5A	STAT5A	PR	0.340423	0.000647037	0.00236474	na	neg	-0.45435	0.044164	0.23229		-0.18826	0.60248	0.99322		-0.27939	0.43435	0.93425
Double-stranded RNA-binding protein Staufen homolog 1	Double-stranded RNA-binding protein Staufen homolog 1	STAU1	PR	0.311777	0.00163894	0.00481849	na	neg	-0.45613	0.043241	0.25603		-0.35402	0.31556	0.99861		0.34574	0.3278	0.90718
Serine/threonine-protein kinase 24	Serine/threonine-protein kinase 24	STK24	PR	0.215648	9.7919e-07	0.000127031	na	neg	-0.46373	0.039447	0.24542		-0.046672	0.89813	0.99861		0.24828	0.48914	0.90718
Serine/threonine-protein kinase 4	Serine/threonine-protein kinase 4	STK4	PR	0.32311	0.00448054	0.0106959	na	neg	-0.66341	0.0014285	0.14735		-0.62598	0.05286	0.99322		0.44807	0.19406	0.93425
Stomatin-like protein 2, mitochondrial	Stomatin-like protein 2, mitochondrial	STOML2	PR	0.265952	0.000189199	0.00170256	na	neg	-0.48159	0.031556	0.26544		-0.19682	0.58576	0.99946		0.39685	0.25617	0.87144
Dolichyl-diphosphooligosaccharide--protein glycosyltransferase subunit STT3B	Dolichyl-diphosphooligosaccharide--protein glycosyltransferase subunit STT3B	STT3B	PR	0.52395	0.0107033	0.0214758	na	neg	-0.47815	0.03297	0.24542		-0.25176	0.48287	0.99861		-0.21694	0.54715	0.90718
Sulfotransferase 1A4	Sulfotransferase 1A4	SULT1A4	PR	0.388942	0.000665749	0.00239715	na	neg	-0.58595	0.0066301	0.21193		-0.38899	0.26657	0.99861		-0.46097	0.17997	0.90718
FACT complex subunit SPT16	FACT complex subunit SPT16	SUPT16H	PR	0.341987	1.0819e-05	0.000249798	0.02	neg	-0.46961	0.036698	0.24542		-0.19506	0.58917	0.99861		0.49732	0.1436	0.90718
Synapse-associated protein 1	Synapse-associated protein 1	SYAP1	PR	0.0939048	0.000292299	0.0013652	na	neg	-0.52374	0.017783	0.21437		-0.292	0.41298	0.99322		0.60517	0.063767	0.93425
Synaptogyrin-2	Synaptogyrin-2	SYNGR2	PR	0.0859631	0.00113685	0.00357371	na	neg	-0.49784	0.0255	0.24371		-0.17991	0.61894	0.99861		0.11922	0.74287	0.95971
Transaldolase	Transaldolase	TALDO1	PR	0.54256	0.000151848	0.000911069	na	neg	-0.49321	0.027123	0.26544		-0.25748	0.47265	0.99946		0.27648	0.43935	0.90222
Threonine--tRNA ligase, cytoplasmic	Threonine--tRNA ligase, cytoplasmic	TARS1	PR	0.357614	0.00034376	0.00151918	na	neg	-0.50691	0.022545	0.26544		-0.37992	0.27885	0.99946		0.38749	0.26858	0.87144
Putative deoxyribonuclease TATDN1	Putative deoxyribonuclease TATDN1	TATDN1	PR	0.0204907	0.000163049	0.00187244	0.1	neg	-0.48086	0.031849	0.2211		-0.17091	0.63686	0.99322		0.089509	0.80576	0.93878
Tubulin-specific chaperone A	Tubulin-specific chaperone A	TBCA	PR	0.487586	6.29864e-05	0.000548474	na	neg	-0.45822	0.042171	0.26544		-0.042054	0.90817	0.99946		-0.068102	0.85172	0.97575
FAST kinase domain-containing protein 4	FAST kinase domain-containing protein 4	TBRG4	PR	0.000700776	0.000243759	0.00187244	0.9	neg	-0.46745	0.037691	0.22562		-0.041061	0.91033	0.99322		0.020339	0.95553	0.97512
T-complex protein 1 subunit alpha	T-complex protein 1 subunit alpha	TCP1	PR	0.352206	7.08266e-06	0.000210445	na	neg	-0.47428	0.034618	0.26544		-0.14374	0.69198	0.99946		0.39642	0.25674	0.87144
Thymocyte nuclear protein 1	Thymocyte nuclear protein 1	THYN1	PR	0.253898	1.69882e-06	0.000143782	na	neg	-0.57743	0.0076748	0.19757		-0.32199	0.36425	0.99322		-0.22761	0.52711	0.93425
Nucleolysin TIAR	Nucleolysin TIAR	TIAL1	PR	0.271102	0.00125459	0.00388478	na	neg	-0.59071	0.0060985	0.20263		-0.45097	0.19084	0.99861		0.096044	0.79183	0.96153
Mitochondrial import inner membrane translocase subunit TIM44	Mitochondrial import inner membrane translocase subunit TIM44	TIMM44	PR	0.226595	0.000422844	0.00173422	na	neg	-0.46649	0.038139	0.24542		-0.19237	0.59442	0.99861		0.33581	0.34279	0.90718
Mitochondrial import inner membrane translocase subunit TIM50	Mitochondrial import inner membrane translocase subunit TIM50	TIMM50	PR	0.180745	0.000493894	0.00193743	na	neg	-0.45306	0.044845	0.23229		-0.17528	0.62815	0.99322		0.51858	0.1246	0.93425
Transketolase	Transketolase	TKT	PR	0.677093	0.012627	0.0246451	na	neg	-0.50144	0.024292	0.26544		-0.43138	0.21322	0.99946		0.10175	0.77972	0.95976
Transmembrane emp24 domain-containing protein 7	Transmembrane emp24 domain-containing protein 7	TMED7	PR	0.496519	0.00210582	0.0059225	na	neg	-0.4743	0.034612	0.24542		-0.2484	0.48893	0.99861		0.067675	0.85264	0.98096
Transmembrane emp24 domain-containing protein 9	Transmembrane emp24 domain-containing protein 9	TMED9	PR	0.598231	0.0280454	0.0475659	na	neg	-0.51262	0.020828	0.24371		-0.35199	0.31854	0.99861		0.030654	0.93301	0.9975
Transmembrane protein 33	Transmembrane protein 33	TMEM33	PR	0.403863	0.000205664	0.00110042	na	neg	-0.48061	0.031951	0.2211		-0.27113	0.44861	0.99322		0.57811	0.080027	0.93425
182 kDa tankyrase-1-binding protein	182 kDa tankyrase-1-binding protein	TNKS1BP1	PR	0.195445	0.000122106	0.000800565	na	neg	-0.4552	0.043722	0.23229		-0.15978	0.65928	0.99322		0.20545	0.56908	0.93425
Mitochondrial import receptor subunit TOM22 homolog	Mitochondrial import receptor subunit TOM22 homolog	TOMM22	PR	0.115452	0.000684097	0.00328861	na	neg	-0.48944	0.028504	0.2211		-0.19844	0.5826	0.99322		0.44305	0.19971	0.93425
DNA topoisomerase 2-alpha	DNA topoisomerase 2-alpha	TOP2A	PR	0.206621	0.017141	0.0320233	na	neg	-0.44757	0.04784	0.25932		-0.37323	0.28809	0.99861		0.2879	0.41988	0.90718
Transformer-2 protein homolog beta	Transformer-2 protein homolog beta	TRA2B	PR	0.224016	3.67277e-05	0.00041197	na	neg	-0.50206	0.024087	0.24371		-0.222	0.53761	0.99861		0.37866	0.28057	0.90718
Tripartite motif-containing protein 29	Tripartite motif-containing protein 29	TRIM29	PR	0.244052	0.00693013	0.0152236	na	neg	-0.57153	0.0084742	0.19757		-0.47783	0.16249	0.99322		0.37709	0.28274	0.93425
tRNA methyltransferase 10 homolog C	tRNA methyltransferase 10 homolog C	TRMT10C	PR	0.0852093	0.000173221	0.000975414	na	neg	-0.61913	0.0036047	0.19757		-0.51065	0.1315	0.99322		0.45411	0.18738	0.93425
Multifunctional methyltransferase subunit TRM112-like protein	Multifunctional methyltransferase subunit TRM112-like protein	TRMT112	PR	0.342377	0.00285675	0.00751309	na	neg	-0.44551	0.048996	0.23824		-0.22511	0.53178	0.99322		0.17054	0.6376	0.93425
Tumor susceptibility gene 101 protein	Tumor susceptibility gene 101 protein	TSG101	PR	0.264384	0.0138754	0.0256088	na	neg	-0.46555	0.038581	0.22752		-0.28432	0.42594	0.99322		0.22664	0.52892	0.93425
Translin	Translin	TSN	PR	0.232903	0.0002439	0.00122963	na	neg	-0.54976	0.012035	0.22195		-0.36558	0.29888	0.99861		0.45556	0.1858	0.90718
Translin-associated protein X	Translin-associated protein X	TSNAX	PR	0.276194	0.000380335	0.00162495	na	neg	-0.48529	0.030085	0.24542		-0.32382	0.36137	0.99861		0.40718	0.24286	0.90718
Twinfilin-2	Twinfilin-2	TWF2	PR	0.495045	0.000244403	0.00122994	na	neg	-0.46432	0.039166	0.24542		-0.12261	0.73579	0.99861		-0.3556	0.31325	0.90718
Thioredoxin	Thioredoxin	TXN	PR	0.319729	2.68872e-07	7.50961e-05	0.06	neg	-0.46989	0.036572	0.26544		0.050503	0.88981	0.99946		-0.054457	0.88123	0.97634
Thioredoxin domain-containing protein 12	Thioredoxin domain-containing protein 12	TXNDC12	PR	0.551863	0.0147427	0.0280875	na	neg	-0.54228	0.013505	0.22195		-0.45558	0.18578	0.99861		0.19755	0.58433	0.92036
Ubiquitin-like domain-containing CTD phosphatase 1	Ubiquitin-like domain-containing CTD phosphatase 1	UBLCP1	PR	0.253691	0.000645218	0.00236474	na	neg	-0.56136	0.010012	0.19757		-0.37795	0.28155	0.99322		0.32457	0.36019	0.93425
Ubiquitin carboxyl-terminal hydrolase isozyme L5	Ubiquitin carboxyl-terminal hydrolase isozyme L5	UCHL5	PR	0.249272	4.04571e-05	0.000429645	na	neg	-0.54496	0.012963	0.19757		-0.31816	0.37031	0.99322		0.23881	0.50639	0.93425
Ubiquitin recognition factor in ER-associated degradation protein 1	Ubiquitin recognition factor in ER-associated degradation protein 1	UFD1	PR	0.259965	0.000145145	0.000881283	na	neg	-0.4865	0.029617	0.2211		-0.25783	0.47202	0.99322		0.54076	0.10653	0.93425
UDP-glucose:glycoprotein glucosyltransferase 1	UDP-glucose:glycoprotein glucosyltransferase 1	UGGT1	PR	0.432413	0.000746921	0.00262409	na	neg	-0.47169	0.035759	0.26544		-0.2158	0.54931	0.99946		0.24835	0.48903	0.90225
UTP--glucose-1-phosphate uridylyltransferase	UTP--glucose-1-phosphate uridylyltransferase	UGP2	PR	0.477887	1.76016e-05	0.00029469	na	neg	-0.45235	0.045228	0.26544		-0.099262	0.78499	0.99946		0.10357	0.77585	0.95976
Uroporphyrinogen decarboxylase	Uroporphyrinogen decarboxylase	UROD	PR	0.323619	0.00126041	0.00397472	na	neg	-0.56762	0.009041	0.19757		-0.38499	0.27194	0.99322		0.26771	0.45458	0.93425
Ubiquitin carboxyl-terminal hydrolase 5	Ubiquitin carboxyl-terminal hydrolase 5	USP5	PR	0.56036	0.00902057	0.0187878	na	neg	-0.47857	0.032793	0.26544		-0.33458	0.34467	0.99946		0.29386	0.40987	0.90222
Vesicle-associated membrane protein-associated protein A	Vesicle-associated membrane protein-associated protein A	VAPA	PR	0.590277	0.00220739	0.00612239	0.02	neg	-0.47778	0.033126	0.26544		-0.31561	0.37437	0.99946		0.26468	0.4599	0.90225
Exportin-T	Exportin-T	XPOT	PR	0.130414	0.00216852	0.00582462	na	neg	-0.47617	0.033807	0.2215		-0.29663	0.40527	0.99322		0.47874	0.16157	0.93425
Angio-associated migratory cell protein	Angio-associated migratory cell protein	AAMP	PR	0.000865117	0.00469996	0.0107159	0.04		-0.17165	0.46932	0.64899		0.33034	0.3512	0.99322		0.51055	0.13158	0.93425
Alanine--tRNA ligase, cytoplasmic	Alanine--tRNA ligase, cytoplasmic	AARS1	PR	0.465921	0.00109003	0.0034675	na		-0.43252	0.056823	0.26544		-0.1599	0.65903	0.99946		0.34949	0.32222	0.87144
ATP-binding cassette sub-family D member 3	ATP-binding cassette sub-family D member 3	ABCD3	PR	0.312301	0.0116813	0.0231554	na		-0.15089	0.52542	0.69172		0.39053	0.26452	0.99322		0.095764	0.79243	0.93425
ATP-binding cassette sub-family E member 1	ATP-binding cassette sub-family E member 1	ABCE1	PR	0.383475	0.003196	0.008152	na		-0.26859	0.2522	0.40872		0.16642	0.64588	0.99861		0.34502	0.32888	0.90718
ATP-binding cassette sub-family F member 2	ATP-binding cassette sub-family F member 2	ABCF2	PR	0.348309	0.00200522	0.0057132	na		-0.4315	0.057473	0.25646		-0.20547	0.56904	0.99322		-0.11373	0.75441	0.93425
Protein ABHD11	Protein ABHD11	ABHD11	PR	0.1536	0.00039682	0.00166536	0.02		-0.32332	0.16437	0.33941		0.1956	0.58813	0.99861		0.023603	0.9484	0.9975
Monoacylglycerol lipase ABHD12	Monoacylglycerol lipase ABHD12	ABHD12	PR	0.00196756	0.00132858	0.00401158	na		-0.31235	0.17999	0.39912		0.049125	0.8928	0.99322		0.4891	0.15139	0.93425
Protein ABHD14B	Protein ABHD14B	ABHD14B	PR	0.4677	4.98523e-05	0.000488552	na		-0.25373	0.2804	0.42081		0.44182	0.20111	0.99946		-0.12963	0.72115	0.95237
3-ketoacyl-CoA thiolase, peroxisomal	3-ketoacyl-CoA thiolase, peroxisomal	ACAA1	PR	0.446728	0.009909	0.0201866	na		-0.25277	0.28228	0.44128		0.1254	0.72995	0.99861		-0.14778	0.6837	0.94918
3-ketoacyl-CoA thiolase, mitochondrial	3-ketoacyl-CoA thiolase, mitochondrial	ACAA2	PR	0.423109	0.000470676	0.00186998	na		-0.33983	0.14266	0.3084		0.12172	0.73766	0.99946		0.05301	0.88436	0.97634
Short/branched chain specific acyl-CoA dehydrogenase, mitochondrial	Short/branched chain specific acyl-CoA dehydrogenase, mitochondrial	ACADSB	PR	0.288224	0.00282727	0.00705051	na		-0.15812	0.50553	0.67587		0.46971	0.17076	0.99322		0.0073571	0.98391	0.9897
Acetyl-CoA acetyltransferase, mitochondrial	Acetyl-CoA acetyltransferase, mitochondrial	ACAT1	PR	0.501152	0.000139294	0.000856932	na		-0.29436	0.20775	0.36022		0.37314	0.28823	0.99946		-0.21243	0.55571	0.91189
Acetyl-CoA acetyltransferase, cytosolic	Acetyl-CoA acetyltransferase, cytosolic	ACAT2	PR	0.286261	0.000180584	0.00100472	na		-0.42703	0.060402	0.26483		-0.15513	0.66871	0.99861		0.38366	0.27375	0.90718
Golgi resident protein GCP60	Golgi resident protein GCP60	ACBD3	PR	0.317603	0.00291077	0.00760503	na		-0.43774	0.05357	0.25968		-0.20212	0.57548	0.99861		0.41036	0.23884	0.90718
ATP-citrate synthase	ATP-citrate synthase	ACLY	PR	0.365041	9.74327e-05	0.000702473	na		-0.31634	0.1742	0.33279		0.21253	0.55554	0.99946		0.15758	0.66372	0.93533
Aconitate hydratase, mitochondrial	Aconitate hydratase, mitochondrial	ACO2	PR	0.604163	0.000558283	0.00210146	na		-0.2232	0.34419	0.46718		0.28781	0.42003	0.99946		0.058844	0.87172	0.97634
Peroxisomal acyl-coenzyme A oxidase 1	Peroxisomal acyl-coenzyme A oxidase 1	ACOX1	PR	0.134	0.000189458	0.0010396	na		-0.35135	0.12876	0.34427		0.046907	0.89762	0.99322		0.19683	0.58574	0.93425
Low molecular weight phosphotyrosine protein phosphatase	Low molecular weight phosphotyrosine protein phosphatase	ACP1	PR	0.417099	0.000226121	0.00116276	na		-0.33486	0.14897	0.32562		0.11155	0.75899	0.99861		0.31087	0.38197	0.90718
Acetyl-coenzyme A synthetase 2-like, mitochondrial	Acetyl-coenzyme A synthetase 2-like, mitochondrial	ACSS1	PR	0.202201	0.00138143	0.00420297	na		-0.26028	0.26774	0.47239		0.18128	0.61623	0.99322		0.26041	0.46744	0.93425
Acetyl-coenzyme A synthetase, cytoplasmic	Acetyl-coenzyme A synthetase, cytoplasmic	ACSS2	PR	0.0684419	0.000700291	0.00282438	na		-0.28872	0.21699	0.44154		0.14172	0.69614	0.99322		0.59431	0.070001	0.93425
Alpha-centractin	Alpha-centractin	ACTR1A	PR	0.446623	1.83244e-05	0.00029469	na		-0.29881	0.20064	0.35491		0.30229	0.39592	0.99946		0.25219	0.48211	0.90225
Actin-related protein 2	Actin-related protein 2	ACTR2	PR	0.637299	0.00482087	0.0113626	na		-0.32031	0.16856	0.32775		-0.043764	0.90445	0.99946		0.10762	0.76729	0.95882
Actin-related protein 3	Actin-related protein 3	ACTR3	PR	0.70398	0.00686784	0.0151157	na		-0.41231	0.070837	0.26544		-0.19593	0.58749	0.99946		0.077104	0.83233	0.96908
Double-stranded RNA-specific adenosine deaminase	Double-stranded RNA-specific adenosine deaminase	ADAR	PR	0.247388	0.000144213	0.000879447	na		-0.18151	0.44374	0.58102		0.49921	0.14184	0.99861		0.54011	0.10704	0.90718
Alpha-adducin	Alpha-adducin	ADD1	PR	0.38931	0.000277187	0.00131758	na		-0.38832	0.090659	0.27828		0.12752	0.72554	0.99861		-0.14177	0.69604	0.94918
Gamma-adducin	Gamma-adducin	ADD3	PR	0.528959	0.0278682	0.0474319	na		-0.3708	0.10751	0.32366		-0.12692	0.72679	0.99322		-0.26811	0.45389	0.93425
CD97 antigen	CD97 antigen	ADGRE5	PR	0.223885	0.000100025	0.000712927	na		-0.32023	0.16867	0.34039		0.083111	0.81944	0.99861		0.22315	0.53544	0.90718
Alcohol dehydrogenase 1C	Alcohol dehydrogenase 1C	ADH1C	PR	0.11191	0.011299	0.0214389	na		-0.15331	0.51874	0.62761		0.3597	0.3073	0.99946		-0.20619	0.56765	0.91266
1,2-dihydroxy-3-keto-5-methylthiopentene dioxygenase	1,2-dihydroxy-3-keto-5-methylthiopentene dioxygenase	ADI1	PR	0.338791	0.00908243	0.0179029	na		0.038404	0.87229	0.94234		0.41612	0.23166	0.99322		0.45136	0.19041	0.93425
ADP-ribose glycohydrolase ARH3	ADP-ribose glycohydrolase ARH3	ADPRS	PR	0.136542	0.00262432	0.0068502	na		-0.32102	0.16757	0.3868		0.11367	0.75454	0.99322		-0.51778	0.12529	0.93425
Adenylosuccinate synthetase isozyme 2	Adenylosuccinate synthetase isozyme 2	ADSS2	PR	0.212876	0.00089587	0.0030002	na		-0.42681	0.060547	0.26483		-0.19508	0.58913	0.99861		0.38838	0.26739	0.90718
Afadin	Afadin	AFDN	PR	0.231918	0.000305753	0.00141011	na		-0.31169	0.18097	0.39954		0.040102	0.91242	0.99322		0.26942	0.45159	0.93425
Protein argonaute-2	Protein argonaute-2	AGO2	PR	0.381882	0.0151406	0.0287671	na		-0.16523	0.48633	0.66254		0.11996	0.74134	0.99322		0.51218	0.13015	0.93425
Alkyldihydroxyacetonephosphate synthase, peroxisomal	Alkyldihydroxyacetonephosphate synthase, peroxisomal	AGPS	PR	0.222573	0.000312839	0.00142909	na		-0.4418	0.051145	0.24329		-0.17755	0.62361	0.99322		0.49226	0.14837	0.93425
Anterior gradient protein 2 homolog	Anterior gradient protein 2 homolog	AGR2	PR	0.220743	0.00869795	0.0182465	na		-0.065578	0.78356	0.82925		0.51262	0.12976	0.99946		-0.2522	0.48208	0.90225
Anterior gradient protein 3	Anterior gradient protein 3	AGR3	PR	0.358433	0.0034187	0.0085636	0.2		-0.37825	0.10009	0.29005		-0.0065097	0.98576	0.99861		-0.49383	0.14688	0.90718
S-adenosylhomocysteine hydrolase-like protein 1	S-adenosylhomocysteine hydrolase-like protein 1	AHCYL1	PR	0.509401	0.018152	0.0333762	na		-0.41838	0.066379	0.27166		-0.20283	0.57411	0.99861		-0.22769	0.52696	0.90718
Activator of 90 kDa heat shock protein ATPase homolog 1	Activator of 90 kDa heat shock protein ATPase homolog 1	AHSA1	PR	0.242487	5.74158e-06	0.000189158	na		-0.34696	0.13394	0.31859		0.17949	0.61978	0.99861		0.37597	0.2843	0.90718
Apoptosis-inducing factor 1, mitochondrial	Apoptosis-inducing factor 1, mitochondrial	AIFM1	PR	0.50333	0.000271836	0.00130903	na		-0.36695	0.1115	0.28199		0.043672	0.90465	0.99946		0.24103	0.50233	0.90228
Adenylate kinase isoenzyme 1	Adenylate kinase isoenzyme 1	AK1	PR	0.658299	0.0177098	0.0327232	na		-0.053634	0.82231	0.86271		0.36747	0.29619	0.99946		0.36162	0.30453	0.87144
Adenylate kinase 2, mitochondrial	Adenylate kinase 2, mitochondrial	AK2	PR	0.319276	0.000286053	0.00134759	na		-0.35668	0.12266	0.29279		0.15567	0.6676	0.99946		-0.016293	0.96437	0.99428
GTP:AMP phosphotransferase AK3, mitochondrial	GTP:AMP phosphotransferase AK3, mitochondrial	AK3	PR	0.539285	0.00399421	0.0097261	na		-0.17873	0.45088	0.58457		0.27523	0.44151	0.99861		-0.21796	0.54522	0.90718
Aldo-keto reductase family 1 member B10	Aldo-keto reductase family 1 member B10	AKR1B10	PR	0.00204685	0.0146468	0.0267201	na		-0.3905	0.088706	0.29733		-0.53525	0.11086	0.99322		0.3344	0.34496	0.93425
Aldo-keto reductase family 1 member C3	Aldo-keto reductase family 1 member C3	AKR1C3	PR	0.492487	0.000700738	0.00249638	na		-0.4365	0.054334	0.25968		-0.18746	0.60403	0.99861		0.35727	0.31082	0.90718
Delta-1-pyrroline-5-carboxylate synthase	Delta-1-pyrroline-5-carboxylate synthase	ALDH18A1	PR	0.305381	0.000260185	0.00127045	na		-0.41641	0.067803	0.26544		-0.077213	0.8321	0.99946		0.38816	0.26768	0.87144
Aldehyde dehydrogenase, mitochondrial	Aldehyde dehydrogenase, mitochondrial	ALDH2	PR	0.381869	4.28965e-05	0.000442103	na		-0.3565	0.12287	0.29279		0.23326	0.51661	0.99946		0.22319	0.53537	0.91189
Delta-1-pyrroline-5-carboxylate dehydrogenase, mitochondrial	Delta-1-pyrroline-5-carboxylate dehydrogenase, mitochondrial	ALDH4A1	PR	0.206458	0.00058284	0.00242604	0.02		-0.38265	0.095879	0.28544		-7.79e-05	0.99983	0.99983		0.41136	0.23758	0.90718
Methylmalonate-semialdehyde dehydrogenase [acylating], mitochondrial	Methylmalonate-semialdehyde dehydrogenase [acylating], mitochondrial	ALDH6A1	PR	0.329407	4.33115e-05	0.000443722	0.08		-0.19416	0.41206	0.56092		0.30191	0.39655	0.99861		-0.33055	0.35089	0.90718
Alpha-aminoadipic semialdehyde dehydrogenase	Alpha-aminoadipic semialdehyde dehydrogenase	ALDH7A1	PR	0.365083	6.72545e-05	0.000565789	na		-0.39648	0.083509	0.26544		0.26042	0.46741	0.99946		-0.14307	0.69336	0.94091
Fructose-bisphosphate aldolase C	Fructose-bisphosphate aldolase C	ALDOC	PR	0.557773	0.0172575	0.0304678	na		-0.31161	0.18109	0.33612		-0.085113	0.81516	0.99946		-0.25576	0.47571	0.90225
Chitobiosyldiphosphodolichol beta-mannosyltransferase	Chitobiosyldiphosphodolichol beta-mannosyltransferase	ALG1	PR	0.000397851	0.000202827	0.00187244	na		-0.40456	0.076846	0.27646		0.035797	0.92179	0.99322		0.08404	0.81746	0.94221
THO complex subunit 4	THO complex subunit 4	ALYREF	PR	0.451538	0.00391516	0.00957944	na		-0.25056	0.28664	0.44464		0.058008	0.87353	0.99861		0.32229	0.36377	0.90718
Alpha-methylacyl-CoA racemase	Alpha-methylacyl-CoA racemase	AMACR	PR	0.000338683	0.000510047	0.00242604	na		-0.25797	0.27216	0.47627		0.48924	0.15126	0.99322		0.11905	0.74323	0.93425
Acidic leucine-rich nuclear phosphoprotein 32 family member A	Acidic leucine-rich nuclear phosphoprotein 32 family member A	ANP32A	PR	0.374608	0.000269357	0.00129934	na		-0.40028	0.080325	0.26544		-0.032334	0.92934	0.99946		0.44838	0.19371	0.87144
Annexin A2	Annexin A2	ANXA2	PR	0.677692	0.00217096	0.00605822	na		-0.12568	0.59751	0.68889		0.47542	0.16491	0.99946		-0.25434	0.47824	0.90225
Annexin A7	Annexin A7	ANXA7	PR	0.628153	0.0130261	0.0252002	na		-0.29601	0.20509	0.35926		-0.0092722	0.97972	0.99946		-0.030159	0.93409	0.99312
AP-1 complex subunit mu-2	AP-1 complex subunit mu-2	AP1M2	PR	0.222279	0.0279269	0.047474	na		-0.43242	0.056888	0.25644		-0.40521	0.24537	0.99322		0.36496	0.29976	0.93425
AP-2 complex subunit alpha-2	AP-2 complex subunit alpha-2	AP2A2	PR	0.498248	0.00157049	0.0046614	na		-0.27327	0.24371	0.38962		0.10319	0.77666	0.99946		0.38635	0.27012	0.87144
AP-3 complex subunit delta-1	AP-3 complex subunit delta-1	AP3D1	PR	0.540122	0.00553712	0.0127706	na		-0.37963	0.098759	0.29005		-0.20658	0.5669	0.99861		0.26893	0.45245	0.90718
DNA-(apurinic or apyrimidinic site) lyase	DNA-(apurinic or apyrimidinic site) lyase	APEX1	PR	0.439212	1.18197e-05	0.000258744	na		-0.42115	0.064419	0.26544		0.047398	0.89655	0.99946		-0.15776	0.66336	0.93533
Amyloid-beta precursor protein	Amyloid-beta precursor protein	APP	PR	0.00080838	0.000202827	0.00187244	0.18		-0.36464	0.11395	0.33033		0.14271	0.69409	0.99322		0.36633	0.29781	0.93425
DCC-interacting protein 13-alpha	DCC-interacting protein 13-alpha	APPL1	PR	0.257791	0.0133068	0.0250275	na		-0.24686	0.29406	0.49839		-0.073678	0.8397	0.99322		0.51706	0.1259	0.93425
Adenine phosphoribosyltransferase	Adenine phosphoribosyltransferase	APRT	PR	0.414711	0.000131228	0.000830434	na		-0.28628	0.22107	0.37143		0.39387	0.26008	0.99946		0.015	0.96719	0.99428
Coatomer subunit delta	Coatomer subunit delta	ARCN1	PR	0.562903	0.00535638	0.0124093	0.02		-0.34734	0.13349	0.29867		-0.060112	0.86898	0.99946		-0.033168	0.92752	0.99007
ADP-ribosylation factor 3	ADP-ribosylation factor 3	ARF3	PR	0.434505	4.88325e-05	0.000480771	na		-0.36939	0.10896	0.27952		0.040173	0.91226	0.99946		0.30972	0.38383	0.89588
ADP-ribosylation factor 4	ADP-ribosylation factor 4	ARF4	PR	0.518672	0.000506557	0.00196879	na		-0.36642	0.11206	0.28231		-0.069818	0.84802	0.99946		0.21283	0.55496	0.91189
Rho GTPase-activating protein 18	Rho GTPase-activating protein 18	ARHGAP18	PR	0.00124948	0.00793165	0.0162651	na		-0.34905	0.13145	0.34505		-0.18335	0.61213	0.99322		0.31246	0.37941	0.93425
Rho GDP-dissociation inhibitor 1	Rho GDP-dissociation inhibitor 1	ARHGDIA	PR	0.667568	0.00099704	0.00326847	na		-0.21212	0.36929	0.48577		0.37194	0.2899	0.99946		-0.061298	0.86641	0.97575
Rho guanine nucleotide exchange factor 1	Rho guanine nucleotide exchange factor 1	ARHGEF1	PR	0.352464	0.0248061	0.0432752	na		-0.29966	0.19929	0.4216		-0.0080532	0.98238	0.99827		0.02241	0.951	0.97478
Armadillo repeat-containing X-linked protein 3	Armadillo repeat-containing X-linked protein 3	ARMCX3	PR	0.00128687	0.00681491	0.0146079	na		-0.3868	0.09204	0.30279		-0.13864	0.70249	0.99322		-0.065674	0.85696	0.9493
Protein-glutamate O-methyltransferase	Protein-glutamate O-methyltransferase	ARMT1	PR	0.246836	0.000175573	0.000984601	na		-0.35458	0.12504	0.34414		-0.035384	0.92269	0.99322		0.49124	0.14934	0.93425
Actin-related protein 2/3 complex subunit 3	Actin-related protein 2/3 complex subunit 3	ARPC3	PR	0.610862	0.0103591	0.0209053	na		-0.42987	0.058532	0.26544		-0.22937	0.52383	0.99946		0.41675	0.23088	0.87144
Actin-related protein 2/3 complex subunit 4	Actin-related protein 2/3 complex subunit 4	ARPC4	PR	0.669886	0.0178754	0.0329545	na		-0.23827	0.31172	0.44274		-0.015731	0.9656	0.99946		0.3677	0.29587	0.87144
Actin-related protein 2/3 complex subunit 5	Actin-related protein 2/3 complex subunit 5	ARPC5	PR	0.561097	0.00148391	0.00446773	na		-0.43357	0.056157	0.26112		-0.17887	0.62101	0.99861		0.087582	0.80988	0.96166
Acid ceramidase	Acid ceramidase	ASAH1	PR	0.521841	0.0141795	0.027107	na		-0.22968	0.32998	0.45761		0.11757	0.74634	0.99946		-0.080461	0.82513	0.96763
Argininosuccinate synthase	Argininosuccinate synthase	ASS1	PR	0.37158	0.0021669	0.0060582	na		-0.23585	0.3168	0.44671		0.25685	0.47377	0.99946		0.59172	0.071549	0.87144
ATPase family AAA domain-containing protein 3A	ATPase family AAA domain-containing protein 3A	ATAD3A	PR	0.161785	2.70597e-05	0.000369199	na		-0.39916	0.081249	0.27796		-0.052581	0.8853	0.99861		0.27573	0.44064	0.90718
Ubiquitin-like modifier-activating enzyme ATG7	Ubiquitin-like modifier-activating enzyme ATG7	ATG7	PR	0.37308	0.0277727	0.0458718	na		-0.26818	0.25295	0.46374		-0.10216	0.77884	0.99322		0.12826	0.72401	0.93425
Bifunctional purine biosynthesis protein PURH	Bifunctional purine biosynthesis protein PURH	ATIC	PR	0.264397	8.75901e-06	0.000234217	0.04		-0.42918	0.058982	0.26544		0.14753	0.68422	0.99946		0.16848	0.64174	0.92453
Sodium/potassium-transporting ATPase subunit alpha-1	Sodium/potassium-transporting ATPase subunit alpha-1	ATP1A1	PR	0.333342	5.88298e-06	0.000189158	na		-0.32852	0.1573	0.31785		0.42021	0.22663	0.99946		0.23942	0.50528	0.90228
Sodium/potassium-transporting ATPase subunit beta-3	Sodium/potassium-transporting ATPase subunit beta-3	ATP1B3	PR	0.409985	0.00143927	0.00435996	na		-0.32006	0.16891	0.34039		0.039556	0.91361	0.99861		0.326	0.35796	0.90718
Sarcoplasmic/endoplasmic reticulum calcium ATPase 2	Sarcoplasmic/endoplasmic reticulum calcium ATPase 2	ATP2A2	PR	0.3935	8.25461e-05	0.000636882	na		-0.42485	0.061871	0.26544		-0.083888	0.81778	0.99946		0.38236	0.27552	0.87144
ATP synthase subunit alpha, mitochondrial	ATP synthase subunit alpha, mitochondrial	ATP5F1A	PR	0.491144	0.000113456	0.00076727	na		-0.3322	0.15244	0.31347		0.19882	0.58186	0.99946		0.064378	0.85976	0.97575
ATP synthase subunit beta, mitochondrial	ATP synthase subunit beta, mitochondrial	ATP5F1B	PR	0.514001	7.14475e-05	0.000581551	na		-0.32393	0.16353	0.32442		0.23705	0.50962	0.99946		0.028699	0.93727	0.99312
ATP synthase subunit gamma, mitochondrial	ATP synthase subunit gamma, mitochondrial	ATP5F1C	PR	0.460178	5.75728e-05	0.000536003	na		-0.24381	0.30026	0.43593		0.38766	0.26835	0.99946		-0.034289	0.92508	0.98986
ATP synthase subunit delta, mitochondrial	ATP synthase subunit delta, mitochondrial	ATP5F1D	PR	0.402823	0.00100798	0.00333564	na		-0.23583	0.31684	0.47068		0.4267	0.21878	0.99861		0.13309	0.71397	0.95684
ATP synthase F(0) complex subunit B1, mitochondrial	ATP synthase F(0) complex subunit B1, mitochondrial	ATP5PB	PR	0.70622	0.0230288	0.040427	na		-0.29731	0.20301	0.35782		-0.06186	0.8652	0.99946		0.072003	0.84331	0.97575
ATP synthase subunit O, mitochondrial	ATP synthase subunit O, mitochondrial	ATP5PO	PR	0.277646	2.40369e-06	0.000163732	na		-0.35061	0.12962	0.29592		0.22564	0.53079	0.99946		0.35107	0.31989	0.87144
V-type proton ATPase catalytic subunit A	V-type proton ATPase catalytic subunit A	ATP6V1A	PR	0.541334	0.0179436	0.0330366	na		-0.37064	0.10767	0.27904		-0.16751	0.64369	0.99946		0.12854	0.72342	0.95237
V-type proton ATPase subunit B, brain isoform	V-type proton ATPase subunit B, brain isoform	ATP6V1B2	PR	0.59259	0.018435	0.0337632	na		-0.36454	0.11405	0.28231		-0.14973	0.6797	0.99946		0.12011	0.74102	0.95736
V-type proton ATPase subunit E 1	V-type proton ATPase subunit E 1	ATP6V1E1	PR	0.345391	0.00488507	0.0114752	na		-0.43328	0.056338	0.26112		-0.19385	0.59154	0.99861		0.14142	0.69675	0.94918
Beta-2-microglobulin	Beta-2-microglobulin	B2M	PR	0.604207	0.0198786	0.0359686	0.04		-0.22412	0.34215	0.46528		0.051493	0.88766	0.99946		0.38911	0.26641	0.87144
Large proline-rich protein BAG6	Large proline-rich protein BAG6	BAG6	PR	0.27069	0.000753825	0.0026417	na		-0.13698	0.56471	0.72246		0.30631	0.38935	0.99322		0.43949	0.20377	0.93425
Barrier-to-autointegration factor	Barrier-to-autointegration factor	BANF1	PR	0.396909	0.000439639	0.00215423	0.1		-0.32069	0.16803	0.34039		0.31564	0.37431	0.99861		0.11942	0.74245	0.95971
Basal cell adhesion molecule	Basal cell adhesion molecule	BCAM	PR	0.326856	0.0182147	0.0334695	na		-0.25524	0.27744	0.4816		0.097336	0.78908	0.99322		-0.16214	0.65449	0.93425
B-cell receptor-associated protein 31	B-cell receptor-associated protein 31	BCAP31	PR	0.61648	0.00223706	0.00619121	na		-0.32904	0.15661	0.31775		-0.077661	0.83114	0.99946		0.27523	0.4415	0.90222
Branched-chain-amino-acid aminotransferase, mitochondrial	Branched-chain-amino-acid aminotransferase, mitochondrial	BCAT2	PR	0.398663	0.0132876	0.0256301	na		-0.2747	0.24115	0.46158		0.017091	0.96262	0.99479		-0.12973	0.72094	0.93425
Bcl-2-associated transcription factor 1	Bcl-2-associated transcription factor 1	BCLAF1	PR	0.241677	6.08185e-05	0.000540983	na		-0.27757	0.23607	0.40137		0.17672	0.62527	0.99861		0.4061	0.24423	0.90718
D-beta-hydroxybutyrate dehydrogenase, mitochondrial	D-beta-hydroxybutyrate dehydrogenase, mitochondrial	BDH1	PR	0.0716426	9.32627e-05	0.00134269	0.06		-0.37789	0.10044	0.29005		0.26884	0.45261	0.99861		-0.15728	0.66433	0.94684
BH3-interacting domain death agonist	BH3-interacting domain death agonist	BID	PR	0.307076	0.000489457	0.00192272	na		-0.32416	0.16321	0.33941		-0.038536	0.91583	0.99861		0.52223	0.12151	0.90718
3'(2'),5'-bisphosphate nucleotidase 1	3'(2'),5'-bisphosphate nucleotidase 1	BPNT1	PR	0.17475	0.0034765	0.00866178	na		-0.43023	0.058293	0.26232		-0.08619	0.81285	0.99861		0.14912	0.68095	0.94918
Lys-63-specific deubiquitinase BRCC36	Lys-63-specific deubiquitinase BRCC36	BRCC3	PR	0.30183	0.00520368	0.0132367	na		-0.39464	0.085082	0.29169		-0.19569	0.58795	0.99322		0.492	0.14862	0.93425
BRO1 domain-containing protein BROX	BRO1 domain-containing protein BROX	BROX	PR	0.332113	0.00685289	0.0150947	na		-0.13706	0.56446	0.72246		0.2851	0.4246	0.99322		0.24928	0.48733	0.93425
Basigin	Basigin	BSG	PR	0.427962	0.00170625	0.00484797	na		-0.39039	0.088797	0.27796		-0.27363	0.44427	0.99861		-0.035859	0.92166	0.9975
Transcription factor BTF3	Transcription factor BTF3	BTF3	PR	0.53989	0.0235666	0.0412674	na		-0.34526	0.13598	0.319		-0.15771	0.66347	0.99861		0.54348	0.10444	0.90718
Transcription factor BTF3 homolog 4	Transcription factor BTF3 homolog 4	BTF3L4	PR	0.490643	0.0203318	0.0365658	na		-0.28845	0.21744	0.44154		-0.085398	0.81455	0.99322		0.36239	0.30343	0.93425
Bystin	Bystin	BYSL	PR	0.00126565	0.00793165	0.0162651	na		-0.026988	0.91007	0.96482		0.61084	0.060658	0.99322		0.32136	0.36523	0.93425
Basic leucine zipper and W2 domain-containing protein 1	Basic leucine zipper and W2 domain-containing protein 1	BZW1	PR	0.410903	6.07726e-05	0.000540983	na		-0.3463	0.13473	0.30008		0.063649	0.86133	0.99946		0.46265	0.17818	0.87144
Complement C1r subcomponent-like protein	Complement C1r subcomponent-like protein	C1RL	PR	0.237776	0.000449095	0.00181786	na		-0.23519	0.3182	0.51889		0.2011	0.57746	0.99322		0.48842	0.15205	0.93425
CAD protein	CAD protein	CAD	PR	0.231952	0.000132013	0.000830434	na		-0.3057	0.18995	0.36001		0.24644	0.49249	0.99861		0.29954	0.40045	0.90718
Calreticulin	Calreticulin	CALR	PR	0.649942	0.0207988	0.0371664	na		-0.40218	0.078765	0.26544		-0.18952	0.59999	0.99946		0.050269	0.89031	0.97854
Cullin-associated NEDD8-dissociated protein 1	Cullin-associated NEDD8-dissociated protein 1	CAND1	PR	0.374162	2.52689e-07	7.50961e-05	0.7		-0.38958	0.08952	0.26742		0.29554	0.40707	0.99946		0.12305	0.73487	0.95583
Calnexin	Calnexin	CANX	PR	0.546323	0.00213139	0.00597688	na		-0.39964	0.080852	0.26544		-0.16482	0.64909	0.99946		0.46315	0.17765	0.87144
Adenylyl cyclase-associated protein 1	Adenylyl cyclase-associated protein 1	CAP1	PR	0.683365	0.00235173	0.00645859	na		-0.43163	0.057391	0.26544		-0.19387	0.59149	0.99946		0.070077	0.84746	0.97575
Macrophage-capping protein	Macrophage-capping protein	CAPG	PR	0.430822	0.000219287	0.00114054	na		-0.3339	0.15021	0.3114		0.061781	0.86537	0.99946		0.0084219	0.98158	0.99645
Calpain-1 catalytic subunit	Calpain-1 catalytic subunit	CAPN1	PR	0.55677	0.000547241	0.00207761	0.22		-0.3766	0.1017	0.27676		-0.043886	0.90418	0.99946		0.28473	0.42524	0.90222
F-actin-capping protein subunit alpha-1	F-actin-capping protein subunit alpha-1	CAPZA1	PR	0.375151	0.00100798	0.00333564	na		-0.43141	0.057536	0.26544		-0.24305	0.49864	0.99946		0.39303	0.2612	0.87144
F-actin-capping protein subunit beta	F-actin-capping protein subunit beta	CAPZB	PR	0.801146	0.0148462	0.0282462	na		-0.21666	0.35888	0.47762		0.072811	0.84157	0.99946		0.25856	0.47072	0.90225
Calcium-regulated heat-stable protein 1	Calcium-regulated heat-stable protein 1	CARHSP1	PR	0.367921	0.00167518	0.00490975	na		-0.082259	0.73027	0.81956		0.51531	0.12741	0.99861		0.39948	0.25275	0.90718
Histone-arginine methyltransferase CARM1	Histone-arginine methyltransferase CARM1	CARM1	PR	0.2307	0.00180796	0.00523822	na		-0.21334	0.36647	0.5656		0.14866	0.6819	0.99322		0.19503	0.58923	0.93425
Cysteine--tRNA ligase, cytoplasmic	Cysteine--tRNA ligase, cytoplasmic	CARS1	PR	0.567122	0.00427054	0.0102913	na		-0.25067	0.28644	0.44464		0.12348	0.73398	0.99861		0.1997	0.58016	0.92036
Peripheral plasma membrane protein CASK	Peripheral plasma membrane protein CASK	CASK	PR	0.155667	0.00058058	0.00217367	na		-0.43042	0.058173	0.25818		-0.1063	0.77009	0.99322		0.18814	0.6027	0.93425
Caspase-1	Caspase-1	CASP1	PR	0.444904	0.0113297	0.0214389	na		-0.30051	0.19796	0.36332		-0.028055	0.93868	0.99861		0.15052	0.67809	0.94918
Carbonyl reductase family member 4	Carbonyl reductase family member 4	CBR4	PR	0.00169182	0.0127834	0.0241243	na		-0.13985	0.55648	0.71619		0.39448	0.25929	0.99322		-0.027015	0.94095	0.97478
Chromobox protein homolog 5	Chromobox protein homolog 5	CBX5	PR	0.287692	0.000357398	0.00155971	na		-0.25824	0.27163	0.43032		0.40627	0.24402	0.99861		0.22872	0.52504	0.90718
Cell cycle and apoptosis regulator protein 2	Cell cycle and apoptosis regulator protein 2	CCAR2	PR	0.350482	1.78453e-05	0.00029469	na		-0.36104	0.11783	0.30626		0.037258	0.91861	0.99861		0.079487	0.82722	0.9735
Coiled-coil domain-containing protein 47	Coiled-coil domain-containing protein 47	CCDC47	PR	0.294564	0.000789802	0.00273009	na		-0.29346	0.20921	0.4299		0.078729	0.82884	0.99322		0.20312	0.57356	0.93425
Coiled-coil domain-containing protein 6	Coiled-coil domain-containing protein 6	CCDC6	PR	0.571767	0.0214652	0.0381619	na		0.012715	0.95757	0.98034		0.5233	0.12061	0.99322		0.13026	0.71985	0.93425
T-complex protein 1 subunit beta	T-complex protein 1 subunit beta	CCT2	PR	0.307347	1.05829e-05	0.000248387	0.02		-0.43825	0.053261	0.26544		-0.058172	0.87318	0.99946		0.47491	0.16544	0.87144
T-complex protein 1 subunit gamma	T-complex protein 1 subunit gamma	CCT3	PR	0.280345	3.27531e-06	0.000170732	na		-0.43142	0.057526	0.26544		0.092137	0.80015	0.99946		0.49711	0.14379	0.87144
T-complex protein 1 subunit delta	T-complex protein 1 subunit delta	CCT4	PR	0.416306	0.000105831	0.000737122	na		-0.33625	0.14719	0.31087		0.23468	0.51399	0.99946		0.42278	0.2235	0.87144
T-complex protein 1 subunit epsilon	T-complex protein 1 subunit epsilon	CCT5	PR	0.38683	6.83308e-05	0.000568096	na		-0.40821	0.073972	0.26544		-0.044188	0.90353	0.99946		0.43807	0.20541	0.87144
T-complex protein 1 subunit zeta	T-complex protein 1 subunit zeta	CCT6A	PR	0.325289	5.99693e-05	0.000540983	na		-0.40482	0.076636	0.26544		-0.025833	0.94353	0.99946		0.48766	0.15278	0.87144
T-complex protein 1 subunit eta	T-complex protein 1 subunit eta	CCT7	PR	0.421387	0.000169041	0.000956679	na		-0.34348	0.13814	0.30286		0.13819	0.70341	0.99946		0.41065	0.23847	0.87144
T-complex protein 1 subunit theta	T-complex protein 1 subunit theta	CCT8	PR	0.409085	1.26438e-05	0.000267532	na		-0.40413	0.077193	0.26544		0.22748	0.52735	0.99946		0.4238	0.22227	0.87144
CD2-associated protein	CD2-associated protein	CD2AP	PR	0.490947	0.0194162	0.0353747	na		-0.18733	0.42903	0.57409		0.08253	0.82069	0.99861		0.5198	0.12357	0.90718
Leukocyte surface antigen CD47	Leukocyte surface antigen CD47	CD47	PR	0.676515	0.0186392	0.0340479	na		-0.33945	0.14314	0.3243		-0.21761	0.54589	0.99861		0.026106	0.94293	0.9975
Cell division cycle 5-like protein	Cell division cycle 5-like protein	CDC5L	PR	0.258087	0.000371932	0.00159816	na		-0.35453	0.1251	0.34414		-0.028047	0.9387	0.99479		0.4495	0.19247	0.93425
Cadherin-1	Cadherin-1	CDH1	PR	0.127244	0.000125407	0.000812283	na		-0.2399	0.30832	0.465		0.42364	0.22246	0.99861		0.32592	0.35807	0.90718
CDP-diacylglycerol--inositol 3-phosphatidyltransferase	CDP-diacylglycerol--inositol 3-phosphatidyltransferase	CDIPT	PR	0.431616	0.0277727	0.0458718	na		-0.33485	0.14899	0.32562		-0.26499	0.45935	0.99861		0.23395	0.51533	0.90718
Cyclin-dependent kinase 1	Cyclin-dependent kinase 1	CDK1	PR	0.254508	0.00377945	0.00931686	na		-0.32528	0.16169	0.38671		0.15663	0.66565	0.99322		0.26692	0.45596	0.93425
CDK5 regulatory subunit-associated protein 3	CDK5 regulatory subunit-associated protein 3	CDK5RAP3	PR	0.560491	0.0235478	0.0412603	na		-0.15883	0.5036	0.63243		0.21386	0.553	0.99861		0.060216	0.86875	0.98232
Protein CDV3 homolog	Protein CDV3 homolog	CDV3	PR	0.610143	0.00453527	0.0107988	na		-0.20721	0.38071	0.53229		0.094136	0.79589	0.99861		-0.016646	0.9636	0.9975
Carcinoembryonic antigen-related cell adhesion molecule 1	Carcinoembryonic antigen-related cell adhesion molecule 1	CEACAM1	PR	0.0264526	0.0133068	0.0250275	na		-0.27717	0.23678	0.40137		0.045465	0.90075	0.99861		0.30313	0.39455	0.90718
Craniofacial development protein 1	Craniofacial development protein 1	CFDP1	PR	0.00141059	0.0213401	0.0362328	0.02		-0.023131	0.92289	0.96482		0.48925	0.15125	0.99322		0.32443	0.36041	0.93425
Cofilin-1	Cofilin-1	CFL1	PR	0.575586	0.000277052	0.00131758	na		-0.38536	0.093355	0.26751		-0.057996	0.87356	0.99946		0.43321	0.21107	0.87144
Chromodomain-helicase-DNA-binding protein 4	Chromodomain-helicase-DNA-binding protein 4	CHD4	PR	0.111304	0.000734565	0.00259045	0.04		-0.3115	0.18125	0.35224		0.25323	0.48024	0.99861		0.54195	0.10561	0.90718
Choline dehydrogenase, mitochondrial	Choline dehydrogenase, mitochondrial	CHDH	PR	0.192481	0.0177148	0.0327232	na		-0.048442	0.83929	0.92672		0.38829	0.26751	0.99322		0.39892	0.25348	0.93425
Cytoskeleton-associated protein 5	Cytoskeleton-associated protein 5	CKAP5	PR	0.31284	0.00458639	0.0104738	na		-0.24901	0.28974	0.49348		0.036293	0.92071	0.99322		0.35753	0.31044	0.93425
Creatine kinase U-type, mitochondrial	Creatine kinase U-type, mitochondrial	CKMT1B	PR	0.517172	0.000286072	0.00134759	na		-0.28369	0.22548	0.37516		0.31894	0.36906	0.99946		-0.18796	0.60305	0.91645
Chloride intracellular channel protein 1	Chloride intracellular channel protein 1	CLIC1	PR	0.377987	3.60659e-06	0.000170732	na		-0.40705	0.074875	0.26544		0.013704	0.97003	0.99946		0.53694	0.10952	0.87144
Methylosome subunit pICln	Methylosome subunit pICln	CLNS1A	PR	0.00055301	0.000784306	0.00287476	na		-0.28919	0.21621	0.44113		0.17659	0.62553	0.99322		0.46638	0.17424	0.93425
Caseinolytic peptidase B protein homolog	Caseinolytic peptidase B protein homolog	CLPB	PR	0.0811106	0.00262432	0.0068502	na		-0.38416	0.094467	0.30577		-0.11784	0.74578	0.99322		0.55281	0.097452	0.93425
ATP-dependent Clp protease proteolytic subunit, mitochondrial	ATP-dependent Clp protease proteolytic subunit, mitochondrial	CLPP	PR	0.116416	0.00131495	0.00397472	na		-0.29184	0.21185	0.43429		0.11209	0.75786	0.99322		0.098775	0.78602	0.93425
Clathrin light chain B	Clathrin light chain B	CLTB	PR	0.598053	0.00664215	0.0148014	na		-0.34739	0.13342	0.31859		-0.095442	0.79311	0.99861		0.10592	0.77088	0.96153
Clathrin heavy chain 1	Clathrin heavy chain 1	CLTC	PR	0.547635	0.000141819	0.00087055	na		-0.32308	0.1647	0.32542		0.071871	0.84359	0.99946		0.43312	0.21118	0.87144
N-acylneuraminate cytidylyltransferase	N-acylneuraminate cytidylyltransferase	CMAS	PR	0.201823	1.74466e-05	0.00029469	na		-0.43855	0.053082	0.25968		-0.088357	0.80822	0.99861		0.35479	0.31444	0.90718
Cellular nucleic acid-binding protein	Cellular nucleic acid-binding protein	CNBP	PR	0.456307	0.00132992	0.00407265	na		-0.35883	0.12026	0.30626		-0.027167	0.94062	0.99861		0.47178	0.16864	0.90718
Cytosolic non-specific dipeptidase	Cytosolic non-specific dipeptidase	CNDP2	PR	0.422454	0.000206363	0.00110205	na		-0.30698	0.188	0.34309		0.15525	0.66846	0.99946		0.17192	0.63484	0.92391
CCR4-NOT transcription complex subunit 1	CCR4-NOT transcription complex subunit 1	CNOT1	PR	0.0207839	0.00120739	0.00396733	na		-0.3834	0.095183	0.30603		-0.052807	0.88481	0.99322		0.25847	0.47088	0.93425
2',3'-cyclic-nucleotide 3'-phosphodiesterase	2',3'-cyclic-nucleotide 3'-phosphodiesterase	CNP	PR	0.614086	0.00832489	0.0176414	na		-0.15835	0.50491	0.63243		0.23551	0.51245	0.99861		0.097242	0.78928	0.96153
Protein canopy homolog 2	Protein canopy homolog 2	CNPY2	PR	0.59587	0.0183829	0.0336899	0.02		-0.35015	0.13016	0.29592		-0.13659	0.70672	0.99946		0.35145	0.31934	0.87144
Conserved oligomeric Golgi complex subunit 3	Conserved oligomeric Golgi complex subunit 3	COG3	PR	0.00264198	0.000756497	0.00282438	0.1		-0.24298	0.30196	0.50581		0.49318	0.1475	0.99322		0.062943	0.86286	0.9493
Coatomer subunit alpha	Coatomer subunit alpha	COPA	PR	0.524468	0.00252153	0.00677829	na		-0.30593	0.18959	0.34343		-0.0016998	0.99628	0.99946		0.3386	0.33855	0.87144
Coatomer subunit beta'	Coatomer subunit beta'	COPB2	PR	0.630298	0.00782422	0.0167713	0.08		-0.39468	0.085048	0.26544		-0.17585	0.62701	0.99946		0.24417	0.4966	0.90225
Coatomer subunit gamma-1	Coatomer subunit gamma-1	COPG1	PR	0.503952	0.00161818	0.00478768	na		-0.41711	0.067294	0.26544		-0.18031	0.61814	0.99946		0.40978	0.23957	0.87144
Coatomer subunit gamma-2	Coatomer subunit gamma-2	COPG2	PR	0.00268336	0.00113064	0.00372391	0.08		-0.24647	0.29485	0.45251		0.14715	0.685	0.99861		0.18688	0.60517	0.92569
COP9 signalosome complex subunit 2	COP9 signalosome complex subunit 2	COPS2	PR	0.479985	0.00650925	0.0145326	na		-0.1502	0.52733	0.69318		0.2813	0.43107	0.99322		0.10879	0.76481	0.93425
COP9 signalosome complex subunit 3	COP9 signalosome complex subunit 3	COPS3	PR	0.373173	0.00122397	0.0038026	0.1		-0.37508	0.1032	0.3204		-0.017809	0.96105	0.99479		0.064058	0.86045	0.9493
COP9 signalosome complex subunit 4	COP9 signalosome complex subunit 4	COPS4	PR	0.298325	6.83424e-05	0.000568096	na		-0.41914	0.065839	0.27126		-0.056695	0.87638	0.99861		0.22433	0.53325	0.90718
COP9 signalosome complex subunit 7b	COP9 signalosome complex subunit 7b	COPS7B	PR	0.0123665	0.00817018	0.0167175	na		-0.13927	0.55816	0.71651		0.33034	0.3512	0.99322		0.56587	0.088178	0.93425
Coatomer subunit zeta-1	Coatomer subunit zeta-1	COPZ1	PR	0.41942	0.000150081	0.000903395	na		-0.38667	0.092152	0.28008		-0.050681	0.88942	0.99861		0.44164	0.20132	0.90718
2-methoxy-6-polyprenyl-1,4-benzoquinol methylase, mitochondrial	2-methoxy-6-polyprenyl-1,4-benzoquinol methylase, mitochondrial	COQ5	PR	0.0281718	0.0201729	0.035369	na		0.019804	0.93395	0.96652		0.48772	0.15272	0.99322		0.27351	0.44448	0.93425
Coronin-1B	Coronin-1B	CORO1B	PR	0.64615	0.00100798	0.00333564	na		-0.10969	0.64526	0.7302		0.59625	0.068864	0.99946		0.52915	0.11577	0.87144
Coronin-7	Coronin-7	CORO7	PR	0.295218	0.00102417	0.00331844	na		-0.15488	0.51441	0.68456		0.27656	0.43921	0.99322		-0.28383	0.42677	0.93425
Cytochrome c oxidase subunit 4 isoform 1, mitochondrial	Cytochrome c oxidase subunit 4 isoform 1, mitochondrial	COX4I1	PR	0.422038	0.000507422	0.00196879	na		-0.22454	0.34122	0.46528		0.61506	0.058416	0.99946		-0.0095144	0.97919	0.99645
Cytochrome c oxidase subunit 6B1	Cytochrome c oxidase subunit 6B1	COX6B1	PR	0.192766	0.000367497	0.0023624	0.64		-0.43527	0.055092	0.26544		0.14665	0.68602	0.99946		-0.3539	0.31573	0.87144
Cytochrome c oxidase subunit 6C	Cytochrome c oxidase subunit 6C	COX6C	PR	0.211012	0.00361051	0.0085969	na		-0.136	0.56752	0.68283		0.41297	0.23557	0.99861		0.037018	0.91913	0.9975
Complexin-2	Complexin-2	CPLX2	PR	0.000660263	0.00632814	0.0135853	na		-0.25533	0.27726	0.4816		0.33034	0.3512	0.99322		0.12177	0.73755	0.93425
Copine-3	Copine-3	CPNE3	PR	0.344074	0.00154321	0.00459998	na		-0.24735	0.29307	0.45091		0.093427	0.7974	0.99861		0.60601	0.063299	0.90718
Cleavage and polyadenylation specificity factor subunit 7	Cleavage and polyadenylation specificity factor subunit 7	CPSF7	PR	0.191958	0.000166351	0.000955074	na		-0.10745	0.65205	0.79634		0.40828	0.24147	0.99322		0.14873	0.68175	0.93425
Carnitine O-palmitoyltransferase 1, liver isoform	Carnitine O-palmitoyltransferase 1, liver isoform	CPT1A	PR	0.346901	0.00558022	0.0128382	na		-0.39962	0.080869	0.26544		-0.12508	0.73062	0.99946		0.18908	0.60086	0.91645
Carnitine O-palmitoyltransferase 2, mitochondrial	Carnitine O-palmitoyltransferase 2, mitochondrial	CPT2	PR	0.538173	0.00726293	0.0157495	na		-0.31261	0.17962	0.35055		0.019942	0.95639	0.99861		-0.16541	0.64791	0.94285
Adapter molecule crk	Adapter molecule crk	CRK	PR	0.485594	0.00179249	0.00519879	na		-0.1643	0.48883	0.61736		0.18708	0.60479	0.99861		-0.17659	0.62554	0.94163
C-reactive protein	C-reactive protein	CRP	PR	0.160681	0.0209404	0.0359264	na		-0.33575	0.14783	0.36603		-0.17885	0.62103	0.99322		0.098213	0.78722	0.93425
Citrate synthase, mitochondrial	Citrate synthase, mitochondrial	CS	PR	0.323853	2.91456e-05	0.000374453	na		-0.37025	0.10808	0.27904		0.2364	0.51082	0.99946		0.21297	0.55468	0.91189
Cold shock domain-containing protein E1	Cold shock domain-containing protein E1	CSDE1	PR	0.200129	0.00719771	0.0156402	na		-0.16937	0.47532	0.60859		0.37717	0.28263	0.99861		0.22868	0.52511	0.90718
Exportin-2	Exportin-2	CSE1L	PR	0.351781	0.000828155	0.00281391	na		-0.39851	0.081797	0.26544		-0.035616	0.92219	0.99946		0.31049	0.38258	0.89588
Casein kinase I isoform alpha	Casein kinase I isoform alpha	CSNK1A1	PR	0.180773	0.00131495	0.00397472	na		-0.21754	0.35688	0.55433		0.24507	0.49497	0.99322		0.35274	0.31743	0.93425
Casein kinase II subunit alpha	Casein kinase II subunit alpha	CSNK2A1	PR	0.263583	0.00728456	0.0149711	0.06		-0.33403	0.15004	0.32562		-0.06878	0.85025	0.99861		0.44369	0.19898	0.90718
Casein kinase II subunit beta	Casein kinase II subunit beta	CSNK2B	PR	0.27182	5.99567e-05	0.000540983	na		-0.40184	0.079041	0.27796		-0.10211	0.77895	0.99861		0.35495	0.3142	0.90718
Cystatin-B	Cystatin-B	CSTB	PR	0.482994	0.000257147	0.00126873	na		-0.22228	0.34624	0.46821		0.4892	0.1513	0.99946		0.24635	0.49263	0.90225
Cleavage stimulation factor subunit 1	Cleavage stimulation factor subunit 1	CSTF1	PR	0.00195085	0.00299961	0.0074603	na		-0.31215	0.18029	0.39912		-0.052392	0.88571	0.99322		0.56035	0.092025	0.93425
Cleavage stimulation factor subunit 2	Cleavage stimulation factor subunit 2	CSTF2	PR	0.137861	0.000380106	0.00236735	na		-0.084797	0.72225	0.84838		0.41246	0.23621	0.99322		0.60479	0.063976	0.93425
C-terminal-binding protein 2	C-terminal-binding protein 2	CTBP2	PR	0.303499	0.00313622	0.00803621	0.02		-0.41412	0.069488	0.27042		-0.21454	0.5517	0.99322		0.26871	0.45284	0.93425
Catenin alpha-1	Catenin alpha-1	CTNNA1	PR	0.392757	0.00220222	0.00582462	na		-0.087633	0.71333	0.77627		0.47255	0.16785	0.99946		0.20007	0.57945	0.91645
Catenin beta-1	Catenin beta-1	CTNNB1	PR	0.103291	8.11709e-06	0.000230565	0.04		-0.42985	0.058544	0.26544		0.223	0.53573	0.99946		0.36605	0.29821	0.87144
Beta-catenin-like protein 1	Beta-catenin-like protein 1	CTNNBL1	PR	0.309532	0.00628452	0.0141326	na		-0.37355	0.10473	0.32131		-0.098124	0.78741	0.99322		0.27053	0.44966	0.93425
Catenin delta-1	Catenin delta-1	CTNND1	PR	0.244844	2.96949e-05	0.000374453	na		-0.25488	0.27814	0.41807		0.34818	0.32417	0.99946		0.23489	0.51361	0.90737
Lysosomal protective protein	Lysosomal protective protein	CTSA	PR	0.355742	0.0072325	0.0156957	na		-0.24888	0.29	0.44804		0.062325	0.86419	0.99861		0.30339	0.39413	0.90718
Cathepsin D	Cathepsin D	CTSD	PR	0.527153	0.000369908	0.00159278	na		-0.24836	0.29103	0.42875		0.19854	0.58242	0.99946		0.11846	0.74446	0.95802
Pro-cathepsin H	Pro-cathepsin H	CTSH	PR	0.305215	0.000243518	0.00122963	na		-0.269	0.25144	0.40872		0.13531	0.70937	0.99861		0.035454	0.92254	0.9975
Cathepsin S	Cathepsin S	CTSS	PR	0.379869	0.00203873	0.00578089	na		-0.31349	0.17833	0.34875		0.019285	0.95783	0.99861		-0.16885	0.641	0.94285
Src substrate cortactin	Src substrate cortactin	CTTN	PR	0.467947	0.000182672	0.00187244	0.06		-0.40167	0.079178	0.26544		-0.22615	0.52982	0.99946		0.49351	0.14718	0.87144
Cytochrome b5	Cytochrome b5	CYB5A	PR	0.67312	0.00576624	0.013147	0.02		-0.16799	0.47896	0.61038		0.23831	0.50731	0.99861		0.21597	0.549	0.90718
Cytochrome c1, heme protein, mitochondrial	Cytochrome c1, heme protein, mitochondrial	CYC1	PR	0.280046	0.000226607	0.00182206	na		-0.38339	0.09519	0.28465		0.14795	0.68336	0.99861		0.28751	0.42054	0.90718
Cytochrome c	Cytochrome c	CYCS	PR	0.320312	0.00047805	0.00188587	na		-0.42845	0.059458	0.26544		-0.054744	0.88061	0.99946		0.17915	0.62044	0.91897
Lanosterol 14-alpha demethylase	Lanosterol 14-alpha demethylase	CYP51A1	PR	0.00166175	0.00381917	0.00908598	0.32		-0.16432	0.48877	0.66481		0.49521	0.14557	0.99322		-0.2115	0.55749	0.93425
Protein FAM49B	Protein FAM49B	CYRIB	PR	0.569136	0.0106562	0.0214163	na		-0.29303	0.2099	0.36088		-0.14341	0.69267	0.99946		0.40004	0.25202	0.87144
Aspartate--tRNA ligase, cytoplasmic	Aspartate--tRNA ligase, cytoplasmic	DARS1	PR	0.335043	8.8336e-05	0.000666504	na		-0.41618	0.067968	0.26544		-0.045241	0.90124	0.99946		0.42174	0.22476	0.87144
Aspartate--tRNA ligase, mitochondrial	Aspartate--tRNA ligase, mitochondrial	DARS2	PR	0.0078947	0.000220636	0.00187244	na		-0.40792	0.074195	0.27764		0.044482	0.90289	0.99861		0.11998	0.74129	0.95971
DAZ-associated protein 1	DAZ-associated protein 1	DAZAP1	PR	0.189499	9.10749e-06	0.000234217	na		-0.18546	0.43373	0.57672		0.3784	0.28094	0.99861		0.53172	0.11369	0.90718
Acyl-CoA-binding protein	Acyl-CoA-binding protein	DBI	PR	0.366804	0.00125094	0.00387779	na		-0.25578	0.27639	0.41718		0.28293	0.4283	0.99946		0.15761	0.66367	0.93533
Drebrin-like protein	Drebrin-like protein	DBNL	PR	0.576382	8.20249e-05	0.000634614	na		-0.38393	0.094689	0.26834		-0.016978	0.96287	0.99946		0.38501	0.27193	0.87144
Lipoamide acyltransferase component of branched-chain alpha-keto acid dehydrogenase complex, mitochondrial	Lipoamide acyltransferase component of branched-chain alpha-keto acid dehydrogenase complex, mitochondrial	DBT	PR	0.434653	0.0244761	0.0427495	na		-0.20207	0.39289	0.58324		0.053731	0.8828	0.99322		0.34611	0.32725	0.93425
m7GpppX diphosphatase	m7GpppX diphosphatase	DCPS	PR	0.29293	2.63937e-05	0.000368469	na		-0.3706	0.10771	0.29541		0.19033	0.59841	0.99861		-0.07246	0.84232	0.97772
Deoxycytidylate deaminase	Deoxycytidylate deaminase	DCTD	PR	0.425817	0.00953173	0.0195895	na		-0.30045	0.19804	0.4216		-0.019414	0.95755	0.99479		0.31608	0.37361	0.93425
Dynactin subunit 1	Dynactin subunit 1	DCTN1	PR	0.443956	0.000398227	0.00166754	na		-0.37249	0.10579	0.29363		-0.042209	0.90783	0.99861		0.35621	0.31237	0.90718
Dynactin subunit 2	Dynactin subunit 2	DCTN2	PR	0.594699	0.000463023	0.00185541	na		-0.26713	0.25489	0.40096		0.15602	0.66688	0.99946		0.00064852	0.99858	0.9996
L-xylulose reductase	L-xylulose reductase	DCXR	PR	0.212792	0.00112226	0.0035379	na		-0.34498	0.13632	0.319		0.13691	0.70607	0.99861		0.16242	0.65393	0.94285
N(G),N(G)-dimethylarginine dimethylaminohydrolase 1	N(G),N(G)-dimethylarginine dimethylaminohydrolase 1	DDAH1	PR	0.29706	4.81956e-05	0.00113135	0.02		-0.30721	0.18766	0.35867		0.62716	0.052279	0.99861		-0.24131	0.50181	0.90718
DNA damage-binding protein 1	DNA damage-binding protein 1	DDB1	PR	0.476437	0.000310629	0.00142461	na		-0.35068	0.12954	0.29592		0.094108	0.79595	0.99946		0.18474	0.60939	0.91645
DDRGK domain-containing protein 1	DDRGK domain-containing protein 1	DDRGK1	PR	0.404989	0.0104692	0.021097	na		-0.2761	0.23867	0.40347		-0.011569	0.9747	0.99861		0.56938	0.085789	0.90718
D-dopachrome decarboxylase	D-dopachrome decarboxylase	DDT	PR	0.35614	0.00170625	0.00484797	0.02		-0.12182	0.60892	0.71487		0.48025	0.16006	0.99861		0.54501	0.10327	0.90718
ATP-dependent RNA helicase DDX1	ATP-dependent RNA helicase DDX1	DDX1	PR	0.424332	0.00170625	0.00484797	na		-0.36869	0.10969	0.28061		0.056296	0.87724	0.99946		0.19431	0.59064	0.91645
Probable ATP-dependent RNA helicase DDX17	Probable ATP-dependent RNA helicase DDX17	DDX17	PR	0.261575	1.17719e-05	0.000258744	na		-0.29973	0.19918	0.35381		0.26555	0.45837	0.99946		0.50325	0.13814	0.87144
ATP-dependent RNA helicase DDX19B	ATP-dependent RNA helicase DDX19B	DDX19B	PR	0.482508	0.000972242	0.00319843	na		-0.093464	0.69511	0.78681		0.31867	0.36949	0.99861		0.41756	0.22988	0.90718
Nucleolar RNA helicase 2	Nucleolar RNA helicase 2	DDX21	PR	0.178427	0.000356993	0.00155971	na		-0.44328	0.050282	0.25968		-0.12663	0.7274	0.99861		0.54761	0.1013	0.90718
Spliceosome RNA helicase DDX39B	Spliceosome RNA helicase DDX39B	DDX39B	PR	0.315689	8.25511e-06	0.000230565	na		-0.36555	0.11298	0.28231		0.14532	0.68875	0.99946		0.37878	0.28041	0.87144
Probable ATP-dependent RNA helicase DDX6	Probable ATP-dependent RNA helicase DDX6	DDX6	PR	0.32462	0.000268192	0.00129595	na		-0.32512	0.1619	0.33941		0.27504	0.44183	0.99861		0.35602	0.31264	0.90718
2,4-dienoyl-CoA reductase, mitochondrial	2,4-dienoyl-CoA reductase, mitochondrial	DECR1	PR	0.294283	0.000527178	0.00202254	na		-0.23715	0.31406	0.44462		0.47835	0.16196	0.99946		0.42739	0.21796	0.87144
Deoxyribose-phosphate aldolase	Deoxyribose-phosphate aldolase	DERA	PR	0.353736	0.00100798	0.00333564	na		-0.40208	0.078844	0.27796		-0.083202	0.81925	0.99861		0.0052889	0.98843	0.9975
DNA fragmentation factor subunit alpha	DNA fragmentation factor subunit alpha	DFFA	PR	0.226985	0.0091129	0.0188815	na		-0.22121	0.34863	0.54676		0.12921	0.72203	0.99322		0.37618	0.28401	0.93425
Diacylglycerol O-acyltransferase 1	Diacylglycerol O-acyltransferase 1	DGAT1	PR	0.168683	0.0123731	0.0242343	na		-0.2369	0.31459	0.51495		0.065393	0.85756	0.99322		0.32219	0.36393	0.93425
ATP-dependent RNA helicase A	ATP-dependent RNA helicase A	DHX9	PR	0.268922	0.00030147	0.00207902	na		-0.3888	0.090222	0.26742		0.058595	0.87226	0.99946		0.54692	0.10183	0.87144
Dihydrolipoyl dehydrogenase, mitochondrial	Dihydrolipoyl dehydrogenase, mitochondrial	DLD	PR	0.495207	4.36228e-05	0.000444666	na		-0.4364	0.054391	0.26544		0.045512	0.90065	0.99946		-0.1683	0.6421	0.92453
Deleted in malignant brain tumors 1 protein	Deleted in malignant brain tumors 1 protein	DMBT1	PR	0.166362	0.00728456	0.0149711	na		-0.42597	0.061113	0.26483		-0.30766	0.38715	0.99861		-0.0038458	0.99159	0.9975
DnaJ homolog subfamily A member 2	DnaJ homolog subfamily A member 2	DNAJA2	PR	0.353422	0.000499731	0.0019521	na		-0.31717	0.17301	0.345		0.12805	0.72443	0.99861		0.38515	0.27174	0.90718
DnaJ homolog subfamily A member 3, mitochondrial	DnaJ homolog subfamily A member 3, mitochondrial	DNAJA3	PR	0.0546404	0.0028168	0.0083252	na		-0.26492	0.25899	0.46404		0.15235	0.67436	0.99322		0.43063	0.2141	0.93425
DnaJ homolog subfamily B member 1	DnaJ homolog subfamily B member 1	DNAJB1	PR	0.186189	2.53583e-05	0.000357783	0.14		-0.36054	0.11838	0.30626		0.37933	0.27966	0.99861		0.41983	0.22709	0.90718
DnaJ homolog subfamily C member 5	DnaJ homolog subfamily C member 5	DNAJC5	PR	0.320129	0.00623931	0.0140422	na		-0.36665	0.11182	0.32962		-0.24473	0.49558	0.99322		0.52068	0.12282	0.93425
DnaJ homolog subfamily C member 8	DnaJ homolog subfamily C member 8	DNAJC8	PR	0.259264	3.32624e-05	0.00039406	na		-0.39963	0.080861	0.28476		-0.050501	0.88981	0.99322		0.1493	0.68059	0.93425
Dynamin-2	Dynamin-2	DNM2	PR	0.325162	4.40219e-06	0.000175647	na		-0.43223	0.057007	0.26544		0.0082012	0.98206	0.99946		0.41006	0.23922	0.87144
Aspartyl aminopeptidase	Aspartyl aminopeptidase	DNPEP	PR	0.46633	1.50486e-05	0.000289132	na		-0.22657	0.33676	0.49085		0.2545	0.47795	0.99861		0.16626	0.6462	0.94285
Dipeptidase 1	Dipeptidase 1	DPEP1	PR	0.0579911	0.00058284	0.00242604	na		-0.14801	0.53345	0.65934		0.54728	0.10155	0.99861		0.17357	0.63154	0.94285
Dolichol-phosphate mannosyltransferase subunit 1	Dolichol-phosphate mannosyltransferase subunit 1	DPM1	PR	0.313933	0.000996468	0.00326847	na		-0.40429	0.077062	0.27646		-0.16924	0.64021	0.99322		0.33963	0.33698	0.93425
Developmentally-regulated GTP-binding protein 1	Developmentally-regulated GTP-binding protein 1	DRG1	PR	0.273197	0.000407353	0.00168804	na		-0.32433	0.16298	0.3868		0.070617	0.84629	0.99322		0.088634	0.80763	0.93969
Developmentally-regulated GTP-binding protein 2	Developmentally-regulated GTP-binding protein 2	DRG2	PR	0.249551	1.78463e-05	0.00029469	0.06		-0.18019	0.44713	0.63038		0.22211	0.5374	0.99322		0.42832	0.21685	0.93425
Desmoglein-2	Desmoglein-2	DSG2	PR	0.267203	0.00131495	0.00397472	na		-0.1838	0.43792	0.57911		0.35211	0.31836	0.99861		0.31415	0.3767	0.90718
Desmoplakin	Desmoplakin	DSP	PR	0.229835	0.00220222	0.00582462	na		-0.27178	0.24639	0.39262		0.28717	0.42111	0.99946		0.39615	0.2571	0.87144
E3 ubiquitin-protein ligase DTX3L	E3 ubiquitin-protein ligase DTX3L	DTX3L	PR	0.142696	0.00203396	0.00577323	na		-0.42421	0.062302	0.26514		-0.0078951	0.98273	0.99827		-0.37354	0.28767	0.93425
Cytoplasmic dynein 1 light intermediate chain 2	Cytoplasmic dynein 1 light intermediate chain 2	DYNC1LI2	PR	0.550415	2.91275e-06	0.000166027	na		-0.13151	0.58048	0.69522		0.62351	0.054084	0.99861		0.36312	0.30238	0.90718
Dynein light chain 2, cytoplasmic	Dynein light chain 2, cytoplasmic	DYNLL2	PR	0.301243	0.000230678	0.00117785	na		-0.30148	0.19644	0.36332		0.11415	0.75353	0.99861		-0.048516	0.89412	0.98776
Delta(3,5)-Delta(2,4)-dienoyl-CoA isomerase, mitochondrial	Delta(3,5)-Delta(2,4)-dienoyl-CoA isomerase, mitochondrial	ECH1	PR	0.632692	0.00458639	0.0104738	na		-0.25221	0.28339	0.42185		0.13059	0.71916	0.99946		-0.007648	0.98327	0.99652
Ethylmalonyl-CoA decarboxylase	Ethylmalonyl-CoA decarboxylase	ECHDC1	PR	0.190164	0.00930486	0.0191797	na		-0.35452	0.1251	0.34414		0.038308	0.91632	0.99322		-0.24786	0.48991	0.93425
Enoyl-CoA hydratase, mitochondrial	Enoyl-CoA hydratase, mitochondrial	ECHS1	PR	0.337467	1.8572e-05	0.000773063	na		-0.34272	0.13908	0.30424		0.36383	0.30136	0.99946		0.3127	0.37902	0.89588
Enoyl-CoA delta isomerase 1, mitochondrial	Enoyl-CoA delta isomerase 1, mitochondrial	ECI1	PR	0.564415	0.0023986	0.00654866	na		-0.15269	0.52044	0.64932		0.3151	0.37518	0.99861		0.39329	0.26086	0.90718
Proteasome adapter and scaffold protein ECM29	Proteasome adapter and scaffold protein ECM29	ECPAS	PR	0.368711	0.0106976	0.0214758	na		-0.092907	0.69684	0.78681		0.29827	0.40254	0.99861		0.38547	0.2713	0.90718
Elongation factor 1-alpha 1	Elongation factor 1-alpha 1	EEF1A1	PR	0.533459	0.000254473	0.00126018	na		-0.32061	0.16814	0.32775		0.092238	0.79994	0.99946		0.21703	0.54699	0.91189
Elongation factor 1-beta	Elongation factor 1-beta	EEF1B2	PR	0.538815	0.00612354	0.0138151	0.04		-0.28213	0.22815	0.37631		-0.0062884	0.98624	0.99946		0.45977	0.18125	0.87144
Elongation factor 2	Elongation factor 2	EEF2	PR	0.543725	0.00235133	0.00645859	na		-0.44301	0.050435	0.26544		-0.25794	0.47183	0.99946		0.39	0.26522	0.87144
116 kDa U5 small nuclear ribonucleoprotein component	116 kDa U5 small nuclear ribonucleoprotein component	EFTUD2	PR	0.572079	0.00344147	0.00858982	na		-0.25284	0.28215	0.42185		0.090606	0.80342	0.99946		0.26734	0.45523	0.90225
EH domain-containing protein 4	EH domain-containing protein 4	EHD4	PR	0.501105	0.00140521	0.0042614	na		-0.039912	0.86732	0.89849		0.5735	0.083035	0.99946		0.082645	0.82044	0.96763
Translation initiation factor eIF-2B subunit alpha	Translation initiation factor eIF-2B subunit alpha	EIF2B1	PR	0.379203	0.000593522	0.00221027	na		-0.37012	0.10821	0.32437		-0.10958	0.76316	0.99322		0.42386	0.22219	0.93425
Eukaryotic translation initiation factor 2 subunit 2	Eukaryotic translation initiation factor 2 subunit 2	EIF2S2	PR	0.412224	0.000362636	0.00157621	na		-0.32277	0.16513	0.33941		0.10361	0.77576	0.99861		0.45096	0.19084	0.90718
Eukaryotic translation initiation factor 2 subunit 3	Eukaryotic translation initiation factor 2 subunit 3	EIF2S3	PR	0.459619	0.00218797	0.00608059	na		-0.30064	0.19776	0.35335		-0.012122	0.97349	0.99946		0.49914	0.14191	0.87144
Eukaryotic translation initiation factor 3 subunit A	Eukaryotic translation initiation factor 3 subunit A	EIF3A	PR	0.543283	0.00361051	0.0085969	na		-0.33718	0.14601	0.31087		-0.11301	0.75592	0.99946		0.34236	0.33286	0.87144
Eukaryotic translation initiation factor 3 subunit B	Eukaryotic translation initiation factor 3 subunit B	EIF3B	PR	0.183688	0.000285302	0.00202246	na		-0.40988	0.072683	0.26544		0.1438	0.69186	0.99946		0.27663	0.43909	0.90222
Eukaryotic translation initiation factor 3 subunit D	Eukaryotic translation initiation factor 3 subunit D	EIF3D	PR	0.408097	0.000696598	0.00249116	na		-0.20743	0.38021	0.53229		0.22386	0.53412	0.99861		0.25027	0.48555	0.90718
Eukaryotic translation initiation factor 3 subunit E	Eukaryotic translation initiation factor 3 subunit E	EIF3E	PR	0.34953	0.000108273	0.000746685	na		-0.34104	0.14115	0.30739		0.045544	0.90058	0.99946		0.34341	0.33128	0.87144
Eukaryotic translation initiation factor 3 subunit F	Eukaryotic translation initiation factor 3 subunit F	EIF3F	PR	0.262446	4.20069e-05	0.000436153	na		-0.37806	0.10027	0.29005		0.067995	0.85195	0.99861		0.51341	0.12906	0.90718
Eukaryotic translation initiation factor 3 subunit G	Eukaryotic translation initiation factor 3 subunit G	EIF3G	PR	0.208615	0.00445923	0.0106767	na		-0.35563	0.12384	0.30696		0.021234	0.95357	0.99861		0.30142	0.39736	0.90718
Eukaryotic translation initiation factor 3 subunit H	Eukaryotic translation initiation factor 3 subunit H	EIF3H	PR	0.313733	1.5509e-05	0.000290154	na		-0.22212	0.34659	0.50123		0.34399	0.33041	0.99861		0.39907	0.25328	0.90718
Eukaryotic translation initiation factor 3 subunit I	Eukaryotic translation initiation factor 3 subunit I	EIF3I	PR	0.272456	0.000459822	0.00184524	na		-0.29548	0.20595	0.37003		0.10324	0.77656	0.99861		0.32733	0.35588	0.90718
Eukaryotic translation initiation factor 3 subunit L	Eukaryotic translation initiation factor 3 subunit L	EIF3L	PR	0.330526	0.00170625	0.00484797	na		-0.22676	0.33634	0.46164		0.2539	0.47904	0.99946		0.34308	0.33178	0.87144
Eukaryotic translation initiation factor 3 subunit M	Eukaryotic translation initiation factor 3 subunit M	EIF3M	PR	0.300037	0.000236155	0.00119489	na		-0.29058	0.21391	0.37484		0.080078	0.82595	0.99861		0.26368	0.46166	0.90718
Eukaryotic initiation factor 4A-I	Eukaryotic initiation factor 4A-I	EIF4A1	PR	0.386966	5.17459e-05	0.000501828	na		-0.4157	0.068324	0.26544		-0.037159	0.91883	0.99946		0.38226	0.27565	0.87144
Eukaryotic initiation factor 4A-III	Eukaryotic initiation factor 4A-III	EIF4A3	PR	0.262553	0.000208571	0.00110581	na		-0.38835	0.090627	0.26742		0.039794	0.91309	0.99946		0.37974	0.27909	0.87144
Eukaryotic translation initiation factor 4 gamma 2	Eukaryotic translation initiation factor 4 gamma 2	EIF4G2	PR	0.365972	0.000427041	0.00174344	na		-0.24236	0.30322	0.46005		0.26191	0.46477	0.99861		0.34691	0.32605	0.90718
Eukaryotic translation initiation factor 5	Eukaryotic translation initiation factor 5	EIF5	PR	0.336474	0.000272397	0.00130947	na		-0.40754	0.074493	0.27764		0.04486	0.90207	0.99861		0.17097	0.63675	0.94285
Eukaryotic translation initiation factor 5A-1	Eukaryotic translation initiation factor 5A-1	EIF5A	PR	0.492978	0.000174852	0.000982621	na		-0.28139	0.22941	0.37631		0.27219	0.44677	0.99946		0.11127	0.75959	0.95878
Eukaryotic translation initiation factor 5B	Eukaryotic translation initiation factor 5B	EIF5B	PR	0.3564	0.00387539	0.00951977	na		-0.43601	0.054633	0.25968		-0.21305	0.55454	0.99861		0.19658	0.58622	0.92036
Eukaryotic translation initiation factor 6	Eukaryotic translation initiation factor 6	EIF6	PR	0.127225	0.00391958	0.00957944	na		-0.31459	0.17673	0.33423		0.38032	0.27831	0.99946		0.46382	0.17693	0.87144
Elongin-B	Elongin-B	ELOB	PR	0.431783	0.000162916	0.000945287	na		-0.36338	0.1153	0.30451		-0.014505	0.96828	0.99861		0.42717	0.21822	0.90718
Elongin-C	Elongin-C	ELOC	PR	0.381957	0.0117636	0.0232854	na		-0.32422	0.16313	0.33941		-0.074979	0.8369	0.99861		0.091281	0.80198	0.96153
ER membrane protein complex subunit 1	ER membrane protein complex subunit 1	EMC1	PR	0.201195	0.000352483	0.0015455	0.02		-0.29441	0.20766	0.42876		0.088598	0.80771	0.99322		0.62208	0.054798	0.93425
Alpha-enolase	Alpha-enolase	ENO1	PR	0.726868	0.00847832	0.0178717	na		-0.32773	0.15836	0.31933		-0.057655	0.8743	0.99946		0.18743	0.60409	0.91645
Enolase-phosphatase E1	Enolase-phosphatase E1	ENOPH1	PR	0.19225	7.39038e-05	0.00058474	na		-0.26367	0.26132	0.41777		0.1745	0.62969	0.99861		0.10908	0.7642	0.96153
Alpha-endosulfine	Alpha-endosulfine	ENSA	PR	0.385018	0.00906028	0.0188424	na		-0.17982	0.44809	0.63038		0.24911	0.48765	0.99322		-0.4038	0.24718	0.93425
Protein 4.1	Protein 4.1	EPB41	PR	0.562539	0.0275633	0.047114	na		-0.36613	0.11236	0.32962		-0.18371	0.61143	0.99322		0.10193	0.77932	0.93425
Band 4.1-like protein 2	Band 4.1-like protein 2	EPB41L2	PR	0.330845	3.82006e-05	0.000419361	na		-0.35234	0.12761	0.29592		0.18613	0.60665	0.99946		0.18347	0.6119	0.91645
Epithelial cell adhesion molecule	Epithelial cell adhesion molecule	EPCAM	PR	0.0642662	9.53613e-06	0.000234217	na		-0.17244	0.46722	0.57886		0.55466	0.096099	0.99946		0.12657	0.72752	0.9527
Epiplakin	Epiplakin	EPPK1	PR	0.458779	0.00907577	0.0188466	na		-0.081092	0.73396	0.79129		0.4082	0.24156	0.99946		0.62759	0.052069	0.87144
Bifunctional glutamate/proline--tRNA ligase	Bifunctional glutamate/proline--tRNA ligase	EPRS1	PR	0.357343	3.06489e-05	0.000375043	na		-0.31369	0.17803	0.33423		0.21649	0.548	0.99946		0.61935	0.056188	0.87144
Epidermal growth factor receptor kinase substrate 8-like protein 3	Epidermal growth factor receptor kinase substrate 8-like protein 3	EPS8L3	PR	0.369848	0.0211339	0.0359264	na		-0.076047	0.74999	0.86986		0.26016	0.46787	0.99322		0.43805	0.20543	0.93425
Endoplasmic reticulum aminopeptidase 2	Endoplasmic reticulum aminopeptidase 2	ERAP2	PR	0.12783	0.0125778	0.0237525	na		-0.1716	0.46945	0.64899		0.29376	0.41003	0.99322		-0.2255	0.53105	0.93425
Enhancer of rudimentary homolog	Enhancer of rudimentary homolog	ERH	PR	0.389766	6.16332e-05	0.000543033	na		-0.2671	0.25495	0.41246		0.26557	0.45833	0.99861		0.28216	0.42961	0.90718
Erlin-1	Erlin-1	ERLIN1	PR	0.170556	2.1552e-05	0.000323628	0.06		-0.24322	0.30147	0.45888		0.21087	0.55869	0.99861		0.49857	0.14244	0.90718
Erlin-2	Erlin-2	ERLIN2	PR	0.320348	3.00777e-05	0.000375043	0.22		-0.36112	0.11774	0.30626		0.23115	0.52051	0.99861		-0.10448	0.77393	0.96153
Endoplasmic reticulum metallopeptidase 1	Endoplasmic reticulum metallopeptidase 1	ERMP1	PR	0.685561	0.0257481	0.0426792	na		-0.37483	0.10345	0.3204		-0.15858	0.6617	0.99322		-0.20248	0.57479	0.93425
Endoplasmic reticulum resident protein 29	Endoplasmic reticulum resident protein 29	ERP29	PR	0.594411	0.00218072	0.00607253	0.04		-0.40161	0.079226	0.26544		-0.14717	0.68494	0.99946		0.24493	0.49521	0.90225
Endoplasmic reticulum resident protein 44	Endoplasmic reticulum resident protein 44	ERP44	PR	0.588047	0.00392027	0.00957944	na		-0.33423	0.14979	0.3114		-0.011222	0.97545	0.99946		-0.29279	0.41167	0.90222
Epithelial splicing regulatory protein 1	Epithelial splicing regulatory protein 1	ESRP1	PR	0.29505	0.000650869	0.00236875	na		-0.34417	0.1373	0.319		0.1567	0.66552	0.99861		0.41313	0.23537	0.90718
Extended synaptotagmin-1	Extended synaptotagmin-1	ESYT1	PR	0.596034	0.0153136	0.0290169	na		-0.13928	0.55811	0.65818		0.21056	0.55929	0.99946		0.064157	0.86023	0.97575
Electron transfer flavoprotein subunit alpha, mitochondrial	Electron transfer flavoprotein subunit alpha, mitochondrial	ETFA	PR	0.328837	2.82766e-06	0.000164534	na		-0.32036	0.16849	0.32775		0.38495	0.272	0.99946		0.13198	0.71627	0.95237
Persulfide dioxygenase ETHE1, mitochondrial	Persulfide dioxygenase ETHE1, mitochondrial	ETHE1	PR	0.347878	0.000915692	0.00304679	na		-0.25768	0.27271	0.415		0.22043	0.54057	0.99946		-0.34377	0.33075	0.87144
Uracil	Uracil	HMDB0000300	PR	0.255086	0.00612379	0.081186	1	neg	-0.49534	0.036597	0.34344		-0.067869	0.85222	0.95386		-0.53843	0.16859	0.68348
4-Hydroxybutyric acid	4-Hydroxybutyric acid	HMDB0000710	PR	0.45635	0.000941786	0.0188357	1	neg	-0.61378	0.00674	0.16446		-0.32308	0.36252	0.89695	neg	-0.73888	0.03625	0.48939
2-Aminoisobutyric acid	2-Aminoisobutyric acid	HMDB0001906	PR	0.474383	0.011655	0.0777001	0.82	neg	-0.62196	0.0058528	0.16446		-0.48412	0.15623	0.89177		-0.53469	0.17215	0.68348
L-Carnitine	L-Carnitine	HMDB0000062	PR	0.474574	0.000643114	0.0182526	1	neg	-0.48076	0.043421	0.35316		-0.14591	0.68752	0.89695		-0.52439	0.18215	0.69444
MG(0:0/18:1(9Z)/0:0)	MG(0:0/18:1(9Z)/0:0)	HMDB0011537	PR	0.477635	0.00849479	0.0991059	1	neg	-0.51181	0.029915	0.32674		-0.34609	0.32727	0.89695		-0.1766	0.6757	0.93677
L-Alanine	L-Alanine	HMDB0000161	PR	0.503908	0.0275837	0.184877	1		0.082739	0.74413	0.96445	pos	0.80782	0.0046988	0.19108		-0.0011083	0.99792	0.99792
Sarcosine	Sarcosine	HMDB0000271	PR	0.506132	0.0359194	0.20953	0.32		-0.28595	0.25001	0.62149		-0.17138	0.63592	0.89695		-0.41417	0.30767	0.79045
Hydroxypropionic acid	Hydroxypropionic acid	HMDB0000700	PR	0.560014	0.0434206	0.173683	0.68	neg	-0.53861	0.0211	0.31841		-0.48112	0.1592	0.89177		0.2509	0.54893	0.91704
Succinic acid	Succinic acid	HMDB0000254	PR	0.63736	0.00343111	0.0533728	0.98		-0.34721	0.15803	0.55086		0.021671	0.95262	0.99236		0.24281	0.56231	0.91704
Glycine	Glycine	HMDB0000123	PR	0.703638	0.0266466	0.128639	0.6		0.025012	0.92152	0.97665		0.58016	0.078706	0.89177		0.47093	0.23887	0.72146
Arachidonic acid	Arachidonic acid	HMDB0001043	PR	0.722009	0.0374337	0.209629	0.86		-0.45051	0.060629	0.4351		-0.20451	0.57089	0.89695		-0.63376	0.091546	0.68348
Palmitoleic acid	Palmitoleic acid	HMDB0003229	PR	0.751322	0.011655	0.0777001	0.88	neg	-0.53059	0.023489	0.31841		-0.51724	0.12575	0.89177		-0.34953	0.39606	0.84795
Heptadecanoic acid	Heptadecanoic acid	HMDB0002259	PR	0.80663	0.0330637	0.201258	0.76		-0.39915	0.10082	0.50664		-0.14669	0.68594	0.89695		-0.46778	0.24246	0.72146
RNA-binding protein EWS	RNA-binding protein EWS	EWSR1	PR	0.204969	6.02871e-06	0.000189193	na		-0.41146	0.071475	0.27712		-0.0037927	0.9917	0.99861		0.3132	0.37821	0.90718
Ezrin	Ezrin	EZR	PR	0.446363	1.10985e-05	0.000254082	na		-0.33441	0.14955	0.3114		0.15535	0.66826	0.99946		0.51979	0.12357	0.87144
Fatty acid-binding protein, liver	Fatty acid-binding protein, liver	FABP1	PR	0.194141	0.00977242	0.0199959	na		-0.11165	0.63934	0.72558		0.44868	0.19338	0.99946		0.018474	0.9596	0.99428
FAS-associated factor 2	FAS-associated factor 2	FAF2	PR	0.355591	0.0127358	0.0247709	na		-0.29684	0.20377	0.36862		-0.06298	0.86278	0.99861		0.51984	0.12353	0.90718
Acylpyruvase FAHD1, mitochondrial	Acylpyruvase FAHD1, mitochondrial	FAHD1	PR	0.136167	0.00359708	0.0100521	na		-0.31662	0.17379	0.39482		0.074076	0.83884	0.99322		0.33561	0.34311	0.93425
Constitutive coactivator of PPAR-gamma-like protein 1	Constitutive coactivator of PPAR-gamma-like protein 1	FAM120A	PR	0.299925	0.000276359	0.00131758	na		-0.35677	0.12256	0.30696		0.094183	0.79579	0.99861		0.47642	0.1639	0.90718
Protein FAM162A	Protein FAM162A	FAM162A	PR	0.313967	1.48495e-05	0.000289132	na		-0.38978	0.089348	0.27796		0.073316	0.84048	0.99861		-0.093083	0.79814	0.96153
Protein FAM98B	Protein FAM98B	FAM98B	PR	0.233674	0.00217124	0.00605822	na		-0.40965	0.07286	0.27712		-0.03293	0.92804	0.99861		0.2269	0.52843	0.90718
Phenylalanine--tRNA ligase alpha subunit	Phenylalanine--tRNA ligase alpha subunit	FARSA	PR	0.34626	0.000872846	0.00294427	na		-0.28377	0.22533	0.38897		0.086197	0.81284	0.99861		0.22304	0.53565	0.90718
Phenylalanine--tRNA ligase beta subunit	Phenylalanine--tRNA ligase beta subunit	FARSB	PR	0.24846	2.67601e-06	0.000164534	na		-0.32658	0.15991	0.31983		0.2375	0.50879	0.99946		0.10779	0.76693	0.95882
rRNA 2'-O-methyltransferase fibrillarin	rRNA 2'-O-methyltransferase fibrillarin	FBL	PR	0.235849	0.00077253	0.00268368	na		-0.35257	0.12734	0.31147		0.086893	0.81135	0.99861		0.37601	0.28424	0.90718
Fructose-1,6-bisphosphatase 1	Fructose-1,6-bisphosphatase 1	FBP1	PR	0.270402	0.000197576	0.00106737	na		-0.37078	0.10754	0.29541		0.021283	0.95346	0.99861		0.47195	0.16846	0.90718
Farnesyl pyrophosphate synthase	Farnesyl pyrophosphate synthase	FDPS	PR	0.323054	0.00245821	0.00665934	na		-0.34602	0.13506	0.31859		0.02688	0.94124	0.99861		-0.0089456	0.98043	0.9975
Fermitin family homolog 1	Fermitin family homolog 1	FERMT1	PR	0.298329	0.0219171	0.0388417	na		-0.19758	0.40372	0.5528		0.079411	0.82738	0.99861		0.30272	0.39522	0.90718
Mitochondrial fission 1 protein	Mitochondrial fission 1 protein	FIS1	PR	0.551278	0.000876981	0.00295109	na		-0.33764	0.14542	0.3243		0.14996	0.67923	0.99861		-0.12884	0.72279	0.95684
Peptidyl-prolyl cis-trans isomerase FKBP1A	Peptidyl-prolyl cis-trans isomerase FKBP1A	FKBP1A	PR	0.619864	0.00597401	0.0135654	na		-0.2794	0.23286	0.37908		0.064061	0.86044	0.99946		0.12299	0.73499	0.95583
Peptidyl-prolyl cis-trans isomerase FKBP4	Peptidyl-prolyl cis-trans isomerase FKBP4	FKBP4	PR	0.238058	6.12068e-05	0.000540983	na		-0.25543	0.27706	0.41718		0.29565	0.4069	0.99946		0.46747	0.1731	0.87144
Peptidyl-prolyl cis-trans isomerase FKBP5	Peptidyl-prolyl cis-trans isomerase FKBP5	FKBP5	PR	0.382788	0.00907352	0.0188466	na		-0.24078	0.30648	0.51103		-0.0046125	0.98991	0.99913		0.063495	0.86166	0.9493
Protein flightless-1 homolog	Protein flightless-1 homolog	FLII	PR	0.617808	0.0103353	0.0208724	na		-0.30492	0.19113	0.41347		-0.11333	0.75524	0.99322		0.26465	0.45995	0.93425
Filamin-B	Filamin-B	FLNB	PR	0.37161	4.13453e-05	0.000435502	na		-0.30136	0.19664	0.35229		0.18812	0.60275	0.99946		0.54256	0.10514	0.87144
Protein farnesyltransferase/geranylgeranyltransferase type-1 subunit alpha	Protein farnesyltransferase/geranylgeranyltransferase type-1 subunit alpha	FNTA	PR	0.484908	0.00233922	0.00644807	na		-0.37273	0.10555	0.29363		-0.16578	0.64716	0.99861		0.35244	0.31787	0.90718
Far upstream element-binding protein 1	Far upstream element-binding protein 1	FUBP1	PR	0.370951	0.000207315	0.00110502	na		-0.42871	0.059288	0.26544		-0.084055	0.81742	0.99946		0.28012	0.43311	0.90222
Far upstream element-binding protein 3	Far upstream element-binding protein 3	FUBP3	PR	0.167206	4.97721e-07	9.92954e-05	na		-0.27406	0.2423	0.40397		0.23361	0.51596	0.99861		0.38879	0.26684	0.90718
Tissue alpha-L-fucosidase	Tissue alpha-L-fucosidase	FUCA1	PR	0.328222	0.00458639	0.0104738	na		-0.1914	0.41887	0.56619		0.41777	0.22962	0.99861		-0.1476	0.68407	0.94918
RNA-binding protein FUS	RNA-binding protein FUS	FUS	PR	0.192699	5.91674e-05	0.000540983	na		-0.43178	0.057296	0.26544		0.030116	0.93418	0.99946		0.24862	0.48853	0.90225
Fragile X mental retardation syndrome-related protein 1	Fragile X mental retardation syndrome-related protein 1	FXR1	PR	0.286177	0.00612193	0.0138151	na		-0.24221	0.30353	0.50746		-0.014237	0.96886	0.99591		0.42888	0.21618	0.93425
Ras GTPase-activating protein-binding protein 1	Ras GTPase-activating protein-binding protein 1	G3BP1	PR	0.206723	2.96222e-05	0.000374453	na		-0.30739	0.18739	0.35867		0.23482	0.51373	0.99861		0.32122	0.36546	0.90718
Ras GTPase-activating protein-binding protein 2	Ras GTPase-activating protein-binding protein 2	G3BP2	PR	0.296049	0.000871854	0.00294427	na		-0.28757	0.21892	0.38147		0.22136	0.5388	0.99861		0.35634	0.31218	0.90718
Gamma-aminobutyric acid receptor-associated protein-like 2	Gamma-aminobutyric acid receptor-associated protein-like 2	GABARAPL2	PR	0.626471	0.0276426	0.0471369	0.04		-0.22541	0.33931	0.53802		0.069024	0.84973	0.99322		0.10776	0.76699	0.93425
UDP-glucose 4-epimerase	UDP-glucose 4-epimerase	GALE	PR	0.0702093	5.44244e-06	0.000189158	na		-0.41306	0.070271	0.27602		0.050301	0.89024	0.99861		0.018033	0.96057	0.9975
Glyceraldehyde-3-phosphate dehydrogenase	Glyceraldehyde-3-phosphate dehydrogenase	GAPDH	PR	0.617055	0.000100388	0.000712927	na		-0.44055	0.05188	0.26544		-0.13366	0.7128	0.99946		0.24794	0.48976	0.90225
Glutamine amidotransferase-like class 1 domain-containing protein 3B, mitochondrial	Glutamine amidotransferase-like class 1 domain-containing protein 3B, mitochondrial	GATD3	PR	0.683121	0.023388	0.041006	na		-0.23552	0.3175	0.47091		0.074905	0.83706	0.99861		-0.14216	0.69524	0.94918
Rab GDP dissociation inhibitor beta	Rab GDP dissociation inhibitor beta	GDI2	PR	0.516181	7.99534e-05	0.00062377	na		-0.41004	0.072558	0.26544		-0.044895	0.90199	0.99946		0.32415	0.36085	0.88984
ATPase ASNA1	ATPase ASNA1	GET3	PR	0.680216	0.00980534	0.0200339	na		-0.23198	0.32503	0.47826		0.15842	0.66202	0.99861		-0.21583	0.54926	0.90718
Glutamine--fructose-6-phosphate aminotransferase [isomerizing] 1	Glutamine--fructose-6-phosphate aminotransferase [isomerizing] 1	GFPT1	PR	0.286254	1.55829e-05	0.000290154	0.02		-0.26338	0.26188	0.40672		0.38513	0.27176	0.99946		0.30135	0.39747	0.89588
GDP-L-fucose synthase	GDP-L-fucose synthase	GFUS	PR	0.237215	7.16268e-05	0.000581551	na		-0.40515	0.076374	0.27764		0.15325	0.67253	0.99861		0.14703	0.68524	0.94918
Gamma-glutamylcyclotransferase	Gamma-glutamylcyclotransferase	GGCT	PR	0.2539	0.00262046	0.00699707	na		-0.38245	0.096069	0.28544		-0.036185	0.92095	0.99861		0.22814	0.52611	0.90718
Gamma-glutamyl hydrolase	Gamma-glutamyl hydrolase	GGH	PR	0.312192	0.0244895	0.0427495	na		-0.3093	0.18451	0.33989		-0.096769	0.79029	0.99946		0.62965	0.051074	0.87144
GTPase IMAP family member 4	GTPase IMAP family member 4	GIMAP4	PR	0.531225	0.00323648	0.00822518	na		-0.26367	0.26133	0.41777		0.060402	0.86835	0.99861		0.37918	0.27986	0.90718
ARF GTPase-activating protein GIT2	ARF GTPase-activating protein GIT2	GIT2	PR	0.244077	0.0168402	0.0304678	na		-0.39863	0.08169	0.28476		-0.16504	0.64865	0.99322		0.11699	0.74757	0.93425
Lactoylglutathione lyase	Lactoylglutathione lyase	GLO1	PR	0.564625	0.000743875	0.00261668	na		-0.13885	0.55935	0.65885		0.51379	0.12874	0.99946		0.38609	0.27046	0.87144
Glyoxalase domain-containing protein 4	Glyoxalase domain-containing protein 4	GLOD4	PR	0.584885	7.30585e-05	0.000582226	na		-0.34642	0.13459	0.30008		0.08488	0.81566	0.99946		-0.33717	0.34072	0.8746
Glutaredoxin-3	Glutaredoxin-3	GLRX3	PR	0.346371	9.7383e-05	0.000702473	0.12		-0.41028	0.072378	0.27712		-0.11941	0.74249	0.99861		0.24519	0.49475	0.90718
Glutaminase kidney isoform, mitochondrial	Glutaminase kidney isoform, mitochondrial	GLS	PR	0.258849	0.000182672	0.00187244	na		-0.39971	0.08079	0.27796		0.013888	0.96963	0.99861		-0.093567	0.7971	0.96153
Glutamate dehydrogenase 1, mitochondrial	Glutamate dehydrogenase 1, mitochondrial	GLUD1	PR	0.497733	0.000325595	0.00146401	na		-0.24711	0.29355	0.43033		0.32684	0.35664	0.99946		0.17865	0.62143	0.91897
GDP-mannose 4,6 dehydratase	GDP-mannose 4,6 dehydratase	GMDS	PR	0.251114	4.19562e-05	0.000436153	0.06		-0.34873	0.13183	0.29699		0.14193	0.6957	0.99946		0.18621	0.60649	0.91645
Glia maturation factor beta	Glia maturation factor beta	GMFB	PR	0.304431	3.09287e-05	0.000375043	na		-0.42333	0.062906	0.26647		-0.10023	0.78295	0.99861		0.14458	0.69025	0.94918
GMP synthase [glutamine-hydrolyzing]	GMP synthase [glutamine-hydrolyzing]	GMPS	PR	0.465524	0.0157455	0.0297143	na		0.016659	0.94442	0.97276		0.55437	0.096314	0.99861		0.23366	0.51587	0.90718
Guanine nucleotide-binding protein G(k) subunit alpha	Guanine nucleotide-binding protein G(k) subunit alpha	GNAI3	PR	0.522984	0.00102922	0.00332324	na		-0.14445	0.54345	0.64556		0.32002	0.36735	0.99946		-0.12254	0.73593	0.95583
Guanine nucleotide-binding protein G(s) subunit alpha isoforms XLas	Guanine nucleotide-binding protein G(s) subunit alpha isoforms XLas	GNAS	PR	0.658675	0.0182521	0.0334941	na		-0.073454	0.75826	0.83804		0.54625	0.10233	0.99861		0.10822	0.76602	0.96153
Guanine nucleotide-binding protein G(I)/G(S)/G(T) subunit beta-1	Guanine nucleotide-binding protein G(I)/G(S)/G(T) subunit beta-1	GNB1	PR	0.685053	0.000916327	0.00304679	na		-0.094937	0.69053	0.76015		0.45574	0.1856	0.99946		0.013351	0.9708	0.99522
Glucosamine-6-phosphate isomerase 1	Glucosamine-6-phosphate isomerase 1	GNPDA1	PR	0.383367	0.00394341	0.00961917	na		-0.3436	0.138	0.31982		-0.10022	0.78296	0.99861		-0.069739	0.84819	0.97827
Glucosamine 6-phosphate N-acetyltransferase	Glucosamine 6-phosphate N-acetyltransferase	GNPNAT1	PR	0.27629	0.000100357	0.000712927	0.04		-0.28318	0.22634	0.45111		0.13057	0.71919	0.99322		-0.12048	0.74024	0.93425
Golgin subfamily A member 2	Golgin subfamily A member 2	GOLGA2	PR	0.103974	0.000162675	0.0016064	na		-0.31941	0.16984	0.38788		0.3066	0.38888	0.99322		0.11182	0.75842	0.93425
Golgi integral membrane protein 4	Golgi integral membrane protein 4	GOLIM4	PR	0.474879	0.0216321	0.0383853	na		-0.26029	0.26771	0.47239		-0.039471	0.91379	0.99322		0.45615	0.18516	0.93425
Vesicle transport protein GOT1B	Vesicle transport protein GOT1B	GOLT1B	PR	0.53709	0.0275605	0.047114	na		-0.4242	0.06231	0.26647		-0.22345	0.5349	0.99861		-0.056948	0.87583	0.9856
Golgi reassembly-stacking protein 2	Golgi reassembly-stacking protein 2	GORASP2	PR	0.236093	0.00201143	0.00572091	na		-0.33271	0.15176	0.32716		0.011339	0.9752	0.99861		0.58916	0.073093	0.90718
Cell surface A33 antigen	Cell surface A33 antigen	GPA33	PR	0.212078	0.000232599	0.00118333	na		-0.073073	0.75948	0.83814		0.61769	0.05704	0.99861		0.47271	0.16768	0.90718
Glycerol-3-phosphate dehydrogenase, mitochondrial	Glycerol-3-phosphate dehydrogenase, mitochondrial	GPD2	PR	0.315384	4.58584e-05	0.000460728	na		-0.38943	0.089655	0.27796		-0.033686	0.92639	0.99861		0.19478	0.58971	0.92036
Glucose-6-phosphate isomerase	Glucose-6-phosphate isomerase	GPI	PR	0.727042	0.00990615	0.0201866	na		-0.26466	0.25947	0.40491		0.083782	0.81801	0.99946		-0.078605	0.82911	0.96763
COP9 signalosome complex subunit 1	COP9 signalosome complex subunit 1	GPS1	PR	0.648717	0.0276357	0.0471369	na		-0.12147	0.60994	0.71487		0.24749	0.49058	0.99861		0.13022	0.71993	0.95684
Glutathione peroxidase 2	Glutathione peroxidase 2	GPX2	PR	0.108614	2.29172e-05	0.000336883	0.32		-0.38473	0.093941	0.28274		0.13886	0.70203	0.99861		0.046836	0.89777	0.98855
Glutamate-rich WD repeat-containing protein 1	Glutamate-rich WD repeat-containing protein 1	GRWD1	PR	0.165803	0.00904166	0.0188177	na		-0.25655	0.2749	0.48009		0.036002	0.92135	0.99322		0.36767	0.29591	0.93425
Gasdermin-B	Gasdermin-B	GSDMB	PR	0.117905	0.00579536	0.0125088	0.14		-0.26479	0.25924	0.46404		0.14399	0.69147	0.99322		-0.10286	0.77736	0.93425
Eukaryotic peptide chain release factor GTP-binding subunit ERF3A	Eukaryotic peptide chain release factor GTP-binding subunit ERF3A	GSPT1	PR	0.302924	6.32912e-05	0.000548982	na		-0.38836	0.090621	0.27828		0.15713	0.66465	0.99861		0.32518	0.35923	0.90718
Glutathione synthetase	Glutathione synthetase	GSS	PR	0.289577	2.34762e-05	0.000341506	na		-0.43089	0.057869	0.26544		0.06464	0.85919	0.99946		-0.0025837	0.99435	0.99797
Glutathione S-transferase kappa 1	Glutathione S-transferase kappa 1	GSTK1	PR	0.30215	5.80815e-06	0.000189158	na		-0.39945	0.081007	0.26544		0.22124	0.53905	0.99946		-0.39787	0.25484	0.87144
Glutathione S-transferase P	Glutathione S-transferase P	GSTP1	PR	0.397399	0.000960668	0.00316409	na		-0.35128	0.12884	0.29592		0.12918	0.72208	0.99946		0.2721	0.44692	0.90222
General transcription factor II-I	General transcription factor II-I	GTF2I	PR	0.105846	0.00325426	0.00824787	na		-0.32984	0.15555	0.33301		0.25619	0.47494	0.99861		0.40932	0.24015	0.90718
GTP-binding protein 1	GTP-binding protein 1	GTPBP1	PR	0.106699	0.00219376	0.00582462	na		-0.3943	0.085371	0.29169		-0.11445	0.7529	0.99322		0.28189	0.43007	0.93425
Histone H1.2	Histone H1.2	H1-2	PR	0.495309	0.00324808	0.00824717	na		-0.11818	0.61973	0.70868		0.025677	0.94387	0.99946		0.46409	0.17664	0.87144
Histone H1.5	Histone H1.5	H1-5	PR	0.320454	0.000870829	0.00294427	na		-0.41614	0.068001	0.27407		-0.33253	0.34783	0.99861		0.25473	0.47755	0.90718
Histone H2A type 1-B/E	Histone H2A type 1-B/E	H2AC4	PR	0.485049	0.00288912	0.00758351	na		-0.12677	0.59433	0.68765		0.31903	0.36892	0.99946		0.47222	0.16819	0.87144
Histone H2A.Z	Histone H2A.Z	H2AZ1	PR	0.535843	0.00300679	0.0077687	na		0.032953	0.89031	0.91939		0.19237	0.59443	0.99946		0.3692	0.29375	0.87144
Histone H2B type 1-K	Histone H2B type 1-K	H2BC12	PR	0.494145	0.005427	0.0125477	na		-0.25697	0.27409	0.41516		0.039302	0.91416	0.99946		0.45002	0.19189	0.87144
Histone H2B type 3-B	Histone H2B type 3-B	H2BC26	PR	0.219772	0.00446471	0.0106767	na		-0.34371	0.13787	0.30286		-0.10683	0.76895	0.99946		0.55235	0.097786	0.87144
Histone H3.2	Histone H3.2	H3C13	PR	0.0349812	0.0133068	0.0250275	na		0.29446	0.20759	0.36022		0.53964	0.1074	0.99946		0.61245	0.059798	0.87144
Histone H4	Histone H4	H4C8	PR	0.513031	0.0213707	0.0380423	na		-0.12585	0.59703	0.68889		0.16242	0.65393	0.99946		0.50355	0.13786	0.87144
Very-long-chain (3R)-3-hydroxyacyl-CoA dehydratase 3	Very-long-chain (3R)-3-hydroxyacyl-CoA dehydratase 3	HACD3	PR	0.59793	0.00361051	0.0085969	na		-0.32921	0.15638	0.3761		-0.49813	0.14284	0.99322		0.42849	0.21664	0.93425
Hydroxyacyl-coenzyme A dehydrogenase, mitochondrial	Hydroxyacyl-coenzyme A dehydrogenase, mitochondrial	HADH	PR	0.232453	0.000392156	0.00165264	na		-0.28742	0.21917	0.36969		0.53673	0.10968	0.99946		0.1783	0.62213	0.91897
Trifunctional enzyme subunit beta, mitochondrial	Trifunctional enzyme subunit beta, mitochondrial	HADHB	PR	0.538283	5.30142e-05	0.000505353	na		-0.27369	0.24296	0.38944		0.31327	0.37811	0.99946		0.18779	0.60339	0.91645
Histidine--tRNA ligase, cytoplasmic	Histidine--tRNA ligase, cytoplasmic	HARS1	PR	0.511944	0.0195213	0.0354968	na		-0.38951	0.08959	0.27796		-0.19169	0.59575	0.99861		0.060938	0.86719	0.98232
Histone acetyltransferase type B catalytic subunit	Histone acetyltransferase type B catalytic subunit	HAT1	PR	0.00124009	0.0104783	0.0205374	na		-0.29828	0.20147	0.42376		-0.20436	0.57117	0.99322		0.54308	0.10474	0.93425
Host cell factor 1	Host cell factor 1	HCFC1	PR	0.402068	0.00116666	0.00364893	na		-0.36543	0.11311	0.32962		-0.055849	0.87821	0.99322		0.31356	0.37765	0.93425
Haloacid dehalogenase-like hydrolase domain-containing 5	Haloacid dehalogenase-like hydrolase domain-containing 5	HDHD5	PR	0.10736	1.82192e-05	0.00029469	na		-0.36962	0.10873	0.29731		0.0013078	0.99714	0.99861		0.38023	0.27843	0.90718
HEAT repeat-containing protein 1	HEAT repeat-containing protein 1	HEATR1	PR	0.142177	0.00148854	0.00446773	na		-0.34282	0.13895	0.35153		-0.052011	0.88653	0.99322		0.52361	0.12034	0.93425
Heme-binding protein 1	Heme-binding protein 1	HEBP1	PR	0.638784	0.00583472	0.0132923	na		-0.33922	0.14343	0.3243		-0.025615	0.944	0.99861		-0.25082	0.48457	0.90718
Beta-hexosaminidase subunit beta	Beta-hexosaminidase subunit beta	HEXB	PR	0.523898	0.00370961	0.0091771	na		-0.29943	0.19965	0.35381		-0.0044146	0.99034	0.99946		0.024609	0.9462	0.99428
Hepatocyte growth factor-regulated tyrosine kinase substrate	Hepatocyte growth factor-regulated tyrosine kinase substrate	HGS	PR	0.173093	1.01933e-07	4.06714e-05	0.22		-0.28112	0.22989	0.45294		0.34936	0.32241	0.99322		0.43055	0.2142	0.93425
3-hydroxyisobutyrate dehydrogenase, mitochondrial	3-hydroxyisobutyrate dehydrogenase, mitochondrial	HIBADH	PR	0.29856	2.65691e-05	0.000368469	na		-0.19778	0.40324	0.5528		0.51622	0.12663	0.99861		0.025844	0.9435	0.9975
Histidine triad nucleotide-binding protein 1	Histidine triad nucleotide-binding protein 1	HINT1	PR	0.576104	0.00354946	0.00997349	na		-0.36544	0.11309	0.28231		0.016764	0.96334	0.99946		-0.065684	0.85693	0.97575
Histidine triad nucleotide-binding protein 2, mitochondrial	Histidine triad nucleotide-binding protein 2, mitochondrial	HINT2	PR	0.295428	5.70711e-06	0.000189158	na		-0.20245	0.392	0.58293		0.35081	0.32028	0.99322		0.091606	0.80129	0.93737
Hexokinase-2	Hexokinase-2	HK2	PR	0.167606	0.000402333	0.00240906	na		-0.35435	0.1253	0.30727		0.10595	0.77083	0.99861		0.30033	0.39915	0.90718
HLA class I histocompatibility antigen, A-69 alpha chain	HLA class I histocompatibility antigen, A-24 alpha chain	HLA-A	PR	0.165932	0.0091085	0.0179029	0.08		-0.31408	0.17747	0.33423		0.55558	0.095432	0.99946		0.48063	0.15968	0.87144
HLA class I histocompatibility antigen, A-3 alpha chain	HLA class I histocompatibility antigen, A-3 alpha chain	HLA-A	PR	0.452217	4.33713e-05	0.000443722	0.08		-0.31408	0.17747	0.33423		0.55558	0.095432	0.99946		0.48063	0.15968	0.87144
HLA class I histocompatibility antigen, B-41 alpha chain	HLA class I histocompatibility antigen, B-41 alpha chain	HLA-B-41	PR	0.502609	0.0290636	0.0490778	na		-0.18189	0.44278	0.55828		0.11091	0.76034	0.99946		0.12855	0.72339	0.95237
HLA class II histocompatibility antigen, DR alpha chain	HLA class II histocompatibility antigen, DR alpha chain	HLA-DRA	PR	0.521698	0.0172496	0.032164	na		-0.35897	0.1201	0.28919		-0.19064	0.5978	0.99946		0.39732	0.25556	0.87144
HLA class II histocompatibility antigen, DRB1-12 beta chain	HLA class II histocompatibility antigen, DRB1-1 beta chain	HLA-DRB1	PR	0.00173605	0.026531	0.0438988	0.04		-0.054961	0.81798	0.85919		0.55413	0.096483	0.99861		0.62844	0.051656	0.90718
High mobility group protein B1	High mobility group protein B1	HMGB1	PR	0.334566	0.000255613	0.00126359	na		-0.43231	0.05696	0.26544		-0.1281	0.72433	0.99946		0.43871	0.20468	0.87144
Hydroxymethylglutaryl-CoA lyase, mitochondrial	Hydroxymethylglutaryl-CoA lyase, mitochondrial	HMGCL	PR	0.139194	0.0022292	0.00617675	na		-0.35956	0.11946	0.33573		0.027097	0.94077	0.99479		0.28716	0.42113	0.93425
Hydroxymethylglutaryl-CoA synthase, mitochondrial	Hydroxymethylglutaryl-CoA synthase, mitochondrial	HMGCS2	PR	0.409732	0.0172575	0.0304678	na		-0.062483	0.79356	0.85778		0.39223	0.26226	0.99861		0.34499	0.32892	0.90718
Heme oxygenase 2	Heme oxygenase 2	HMOX2	PR	0.317211	0.00401976	0.00976814	na		-0.36271	0.11602	0.33298		-0.10534	0.7721	0.99322		0.26767	0.45466	0.93425
Heterogeneous nuclear ribonucleoprotein A0	Heterogeneous nuclear ribonucleoprotein A0	HNRNPA0	PR	0.192409	5.89214e-06	0.000189158	0.02		-0.39191	0.087454	0.26742		0.21786	0.54542	0.99946		0.27127	0.44837	0.90222
Heterogeneous nuclear ribonucleoprotein A1	Heterogeneous nuclear ribonucleoprotein A1	HNRNPA1	PR	0.371326	0.000167698	0.000956679	na		-0.38345	0.095134	0.26835		-0.011705	0.9744	0.99946		0.38697	0.26927	0.87144
Heterogeneous nuclear ribonucleoproteins A2/B1	Heterogeneous nuclear ribonucleoproteins A2/B1	HNRNPA2B1	PR	0.344814	9.09125e-05	0.000679449	na		-0.40685	0.075033	0.26544		0.020382	0.95543	0.99946		0.29991	0.39984	0.89588
Heterogeneous nuclear ribonucleoprotein A3	Heterogeneous nuclear ribonucleoprotein A3	HNRNPA3	PR	0.35885	0.00011675	0.000778242	na		-0.28944	0.2158	0.36589		0.3044	0.39247	0.99946		0.4405	0.20262	0.87144
Heterogeneous nuclear ribonucleoprotein A/B	Heterogeneous nuclear ribonucleoprotein A/B	HNRNPAB	PR	0.20814	0.000194205	0.00170256	na		-0.36105	0.11781	0.28633		0.14042	0.69883	0.99946		0.46454	0.17617	0.87144
Heterogeneous nuclear ribonucleoproteins C1/C2	Heterogeneous nuclear ribonucleoproteins C1/C2	HNRNPC	PR	0.295231	1.08219e-05	0.000249798	na		-0.42089	0.064605	0.26544		-0.012643	0.97235	0.99946		0.5231	0.12077	0.87144
Heterogeneous nuclear ribonucleoprotein D0	Heterogeneous nuclear ribonucleoprotein D0	HNRNPD	PR	0.327895	5.26398e-05	0.000505233	na		-0.40706	0.074864	0.26544		0.031334	0.93152	0.99946		0.27622	0.4398	0.90222
Heterogeneous nuclear ribonucleoprotein D-like	Heterogeneous nuclear ribonucleoprotein D-like	HNRNPDL	PR	0.197925	0.000101336	0.000712927	na		-0.38046	0.097956	0.2731		0.041801	0.90872	0.99946		0.20992	0.56051	0.91266
Heterogeneous nuclear ribonucleoprotein H	Heterogeneous nuclear ribonucleoprotein H	HNRNPH1	PR	0.302111	1.7855e-05	0.00029469	na		-0.36289	0.11582	0.28576		0.18742	0.60413	0.99946		0.32833	0.35432	0.88624
Heterogeneous nuclear ribonucleoprotein H2	Heterogeneous nuclear ribonucleoprotein H2	HNRNPH2	PR	0.254533	1.79467e-05	0.00029469	na		-0.31246	0.17984	0.33509		0.087132	0.81084	0.99946		0.23612	0.51134	0.90596
Heterogeneous nuclear ribonucleoprotein K	Heterogeneous nuclear ribonucleoprotein K	HNRNPK	PR	0.313498	1.47088e-05	0.000289132	na		-0.33384	0.1503	0.3114		0.23612	0.51134	0.99946		0.53272	0.11288	0.87144
Heterogeneous nuclear ribonucleoprotein L	Heterogeneous nuclear ribonucleoprotein L	HNRNPL	PR	0.30811	5.86541e-05	0.000540983	na		-0.36681	0.11165	0.28199		0.13584	0.70828	0.99946		0.36069	0.30587	0.87144
Heterogeneous nuclear ribonucleoprotein M	Heterogeneous nuclear ribonucleoprotein M	HNRNPM	PR	0.406733	3.44135e-05	0.000395493	na		-0.37634	0.10195	0.27676		0.043615	0.90477	0.99946		0.39074	0.26424	0.87144
Heterogeneous nuclear ribonucleoprotein R	Heterogeneous nuclear ribonucleoprotein R	HNRNPR	PR	0.251482	3.71418e-07	8.64476e-05	na		-0.39575	0.084131	0.26544		0.17864	0.62145	0.99946		-0.064183	0.86018	0.97575
Heterogeneous nuclear ribonucleoprotein U	Heterogeneous nuclear ribonucleoprotein U	HNRNPU	PR	0.244703	0.000287198	0.00202372	na		-0.36721	0.11123	0.28199		0.16481	0.6491	0.99946		0.46501	0.17568	0.87144
Heterogeneous nuclear ribonucleoprotein U-like protein 2	Heterogeneous nuclear ribonucleoprotein U-like protein 2	HNRNPUL2	PR	0.447482	0.00040015	0.00167058	na		-0.40613	0.075595	0.26544		-0.039296	0.91417	0.99946		0.049726	0.89149	0.97854
Heterochromatin protein 1-binding protein 3	Heterochromatin protein 1-binding protein 3	HP1BP3	PR	0.552363	0.00050044	0.00195214	na		-0.30952	0.18418	0.33989		0.081292	0.82334	0.99946		0.050047	0.8908	0.97854
Hippocalcin-like protein 1	Hippocalcin-like protein 1	HPCAL1	PR	0.409905	0.00728456	0.0149711	0.02		-0.35786	0.12134	0.3065		-0.19759	0.58426	0.99861		-0.17071	0.63727	0.94285
Hypoxanthine-guanine phosphoribosyltransferase	Hypoxanthine-guanine phosphoribosyltransferase	HPRT1	PR	0.341117	7.19438e-05	0.000581611	na		-0.42988	0.058522	0.26544		-0.0058032	0.98731	0.99946		0.1149	0.75195	0.95878
Heat shock factor-binding protein 1	Heat shock factor-binding protein 1	HSBP1	PR	0.271	0.0166221	0.0311581	na		-0.41152	0.071429	0.2721		-0.26732	0.45526	0.99322		-0.29271	0.4118	0.93425
Corticosteroid 11-beta-dehydrogenase isozyme 2	Corticosteroid 11-beta-dehydrogenase isozyme 2	HSD11B2	PR	0.0228236	0.000700291	0.00282438	na		-0.40497	0.07652	0.27646		0.051507	0.88763	0.99322		-0.29381	0.40995	0.93425
3-hydroxyacyl-CoA dehydrogenase type-2	3-hydroxyacyl-CoA dehydrogenase type-2	HSD17B10	PR	0.497235	0.000468866	0.00186545	na		-0.33347	0.15078	0.31173		0.083682	0.81822	0.99946		-0.0052638	0.98849	0.9972
Very-long-chain 3-oxoacyl-CoA reductase	Very-long-chain 3-oxoacyl-CoA reductase	HSD17B12	PR	0.369213	0.000159186	0.000939969	na		-0.40195	0.078953	0.26544		-0.042759	0.90663	0.99946		0.42582	0.21983	0.87144
Peroxisomal multifunctional enzyme type 2	Peroxisomal multifunctional enzyme type 2	HSD17B4	PR	0.277732	2.48847e-05	0.000356426	na		-0.4057	0.075937	0.26544		-0.011349	0.97518	0.99946		0.094151	0.79586	0.96212
Hydroxysteroid dehydrogenase-like protein 2	Hydroxysteroid dehydrogenase-like protein 2	HSDL2	PR	0.248399	0.00302238	0.00778738	na		-0.10455	0.66091	0.7578		0.49687	0.14402	0.99861		0.43199	0.2125	0.90718
Heat shock protein HSP 90-alpha	Heat shock protein HSP 90-alpha	HSP90AA1	PR	0.514001	6.25111e-05	0.000547315	na		-0.32441	0.16288	0.32378		0.1464	0.68652	0.99946		0.59795	0.06787	0.87144
Heat shock protein HSP 90-beta	Heat shock protein HSP 90-beta	HSP90AB1	PR	0.236027	8.5148e-05	0.000649777	0.02		-0.42348	0.062804	0.26544		-0.0096973	0.97879	0.99946		0.45874	0.18236	0.87144
Endoplasmin	Endoplasmin	HSP90B1	PR	0.564036	0.00728456	0.0149711	na		-0.42835	0.059528	0.26544		-0.23014	0.5224	0.99946		-0.045076	0.9016	0.97865
Heat shock 70 kDa protein 4	Heat shock 70 kDa protein 4	HSPA4	PR	0.292036	4.17749e-05	0.000436153	na		-0.43822	0.05328	0.26544		-0.063551	0.86154	0.99946		0.40017	0.25185	0.87144
Heat shock cognate 71 kDa protein	Heat shock cognate 71 kDa protein	HSPA8	PR	0.509461	0.000128613	0.000824164	na		-0.35758	0.12165	0.2922		0.07749	0.8315	0.99946		0.44076	0.20232	0.87144
Stress-70 protein, mitochondrial	Stress-70 protein, mitochondrial	HSPA9	PR	0.457584	0.000825732	0.0028091	na		-0.43474	0.05542	0.26544		-0.14619	0.68696	0.99946		0.064354	0.85981	0.97575
60 kDa heat shock protein, mitochondrial	60 kDa heat shock protein, mitochondrial	HSPD1	PR	0.180577	7.9571e-05	0.000622526	na		-0.42133	0.064293	0.26544		0.13838	0.70301	0.99946		0.29094	0.41477	0.90222
10 kDa heat shock protein, mitochondrial	10 kDa heat shock protein, mitochondrial	HSPE1	PR	0.191394	0.000343326	0.00151918	na		-0.43119	0.057672	0.26544		0.051689	0.88723	0.99946		0.23003	0.5226	0.90885
Heat shock protein 105 kDa	Heat shock protein 105 kDa	HSPH1	PR	0.169267	0.00174446	0.00508588	na		-0.42296	0.063162	0.26544		-0.11062	0.76096	0.99946		0.45647	0.1848	0.87144
Huntingtin-interacting protein K	Huntingtin-interacting protein K	HYPK	PR	0.250942	0.00022316	0.00115424	na		-0.19941	0.39928	0.58968		0.19768	0.58407	0.99322		0.54996	0.099553	0.93425
Isoleucine--tRNA ligase, cytoplasmic	Isoleucine--tRNA ligase, cytoplasmic	IARS1	PR	0.236795	4.4138e-05	0.000446657	na		-0.43478	0.055395	0.26544		-0.086049	0.81316	0.99946		0.48394	0.15641	0.87144
Insulin-degrading enzyme	Insulin-degrading enzyme	IDE	PR	0.115439	0.0016994	0.00484797	na		-0.26161	0.26521	0.47179		0.2165	0.54798	0.99322		-0.21259	0.55541	0.93425
Isocitrate dehydrogenase [NADP] cytoplasmic	Isocitrate dehydrogenase [NADP] cytoplasmic	IDH1	PR	0.540447	6.00144e-06	0.000189193	na		-0.19757	0.40376	0.52063		0.56259	0.090451	0.99946		-0.19097	0.59716	0.91645
Isocitrate dehydrogenase [NADP], mitochondrial	Isocitrate dehydrogenase [NADP], mitochondrial	IDH2	PR	0.536489	0.000209041	0.00110581	na		-0.26903	0.25139	0.39735		0.25743	0.47274	0.99946		0.28604	0.42302	0.90222
Isocitrate dehydrogenase [NAD] subunit alpha, mitochondrial	Isocitrate dehydrogenase [NAD] subunit alpha, mitochondrial	IDH3A	PR	0.560073	0.000162885	0.000945287	na		-0.3021	0.19548	0.35086		0.1609	0.657	0.99946		0.12603	0.72865	0.9527
Isocitrate dehydrogenase [NAD] subunit beta, mitochondrial	Isocitrate dehydrogenase [NAD] subunit beta, mitochondrial	IDH3B	PR	0.155791	3.47738e-05	0.000396422	na		-0.35973	0.11926	0.30626		0.075511	0.83576	0.99861		0.27238	0.44644	0.90718
Isopentenyl-diphosphate Delta-isomerase 1	Isopentenyl-diphosphate Delta-isomerase 1	IDI1	PR	0.226212	0.0021052	0.0059225	na		-0.22555	0.339	0.53802		0.025604	0.94403	0.99479		0.52207	0.12164	0.93425
Gamma-interferon-inducible protein 16	Gamma-interferon-inducible protein 16	IFI16	PR	0.384947	0.00245815	0.00665934	na		-0.34002	0.14243	0.3243		0.10306	0.77693	0.99861		-0.052832	0.88475	0.98776
Interferon-induced transmembrane protein 3	Interferon-induced transmembrane protein 3	IFITM3	PR	0.182157	0.0279786	0.047504	na		-0.34866	0.13191	0.31679		-0.24592	0.49342	0.99861		0.38371	0.27368	0.90718
Interleukin enhancer-binding factor 2	Interleukin enhancer-binding factor 2	ILF2	PR	0.27296	2.18296e-05	0.000324309	na		-0.42313	0.063043	0.26544		-0.033745	0.92627	0.99946		0.42936	0.21561	0.87144
Acetolactate synthase-like protein	Acetolactate synthase-like protein	ILVBL	PR	0.34784	0.000329839	0.00187244	na		-0.35898	0.12009	0.30626		0.0593	0.87074	0.99861		0.4807	0.15962	0.90718
Inositol monophosphatase 1	Inositol monophosphatase 1	IMPA1	PR	0.525483	0.00131495	0.00397472	na		-0.23935	0.30946	0.465		0.44331	0.19942	0.99861		-0.0079157	0.98269	0.9975
Inosine-5'-monophosphate dehydrogenase 2	Inosine-5'-monophosphate dehydrogenase 2	IMPDH2	PR	0.462902	0.00111165	0.00352024	na		-0.19487	0.41032	0.52702		0.2897	0.41685	0.99946		0.38935	0.26609	0.87144
Importin-4	Importin-4	IPO4	PR	0.424752	0.0250154	0.0435858	na		-0.42543	0.061478	0.26507		-0.27175	0.44753	0.99861		0.44698	0.19528	0.90718
Importin-9	Importin-9	IPO9	PR	0.244636	0.00301771	0.00778738	na		-0.29802	0.20188	0.42376		-0.026494	0.94209	0.99479		0.53178	0.11363	0.93425
Ras GTPase-activating-like protein IQGAP1	Ras GTPase-activating-like protein IQGAP1	IQGAP1	PR	0.670815	0.000715755	0.00254339	na		-0.35068	0.12954	0.29592		-0.0033742	0.99262	0.99946		0.099127	0.78528	0.96126
Interferon regulatory factor 2-binding protein 2	Interferon regulatory factor 2-binding protein 2	IRF2BP2	PR	0.129019	0.00390324	0.00957133	na		-0.36669	0.11178	0.32962		-0.13499	0.71003	0.99322		0.40785	0.242	0.93425
Isochorismatase domain-containing protein 1	Isochorismatase domain-containing protein 1	ISOC1	PR	0.369781	0.00105582	0.00338564	na		-0.14401	0.5447	0.66684		0.25619	0.47493	0.99861		0.14625	0.68683	0.94918
Integrin alpha-2	Integrin alpha-2	ITGA2	PR	0.418072	0.00200668	0.0057132	na		-0.43366	0.056103	0.25541		-0.22623	0.52968	0.99322		0.32579	0.35829	0.93425
Integrin alpha-6	Integrin alpha-6	ITGA6	PR	0.104833	0.00270369	0.00717815	na		-0.12774	0.59147	0.70566		0.56761	0.086987	0.99861		0.36461	0.30026	0.90718
Integrin beta-4	Integrin beta-4	ITGB4	PR	0.192363	0.00220222	0.00582462	na		-0.20921	0.37602	0.52814		0.47749	0.16282	0.99861		0.38196	0.27607	0.90718
Isovaleryl-CoA dehydrogenase, mitochondrial	Isovaleryl-CoA dehydrogenase, mitochondrial	IVD	PR	0.441271	5.50571e-05	0.000521269	na		-0.42722	0.060274	0.26483		-0.032143	0.92976	0.99861		-0.1212	0.73873	0.95971
Jupiter microtubule associated homolog 1	Jupiter microtubule associated homolog 1	JPT1	PR	0.0565633	0.000551099	0.00286633	na		-0.19826	0.40208	0.59113		0.57579	0.081534	0.99322		0.53233	0.11319	0.93425
Junction plakoglobin	Junction plakoglobin	JUP	PR	0.132917	0.000281942	0.00200884	na		-0.29075	0.21364	0.36285		0.31169	0.38065	0.99946		0.43583	0.208	0.87144
Lysine--tRNA ligase	Lysine--tRNA ligase	KARS1	PR	0.346202	0.00109167	0.00346875	na		-0.4194	0.065652	0.26544		-0.17181	0.63507	0.99946		0.44439	0.19819	0.87144
Kinesin-like protein KIF13B	Kinesin-like protein KIF13B	KIF13B	PR	0.445351	0.00577698	0.0125088	na		-0.18276	0.44057	0.62617		0.20478	0.57035	0.99322		0.037105	0.91894	0.96906
Kinesin-1 heavy chain	Kinesin-1 heavy chain	KIF5B	PR	0.43395	0.000662817	0.00239596	na		-0.28912	0.21633	0.36615		0.13632	0.70727	0.99946		0.37258	0.28901	0.87144
Kinesin light chain 1	Kinesin light chain 1	KLC1	PR	0.517603	0.00834455	0.0176563	na		-0.37896	0.099398	0.29005		-0.1638	0.65115	0.99861		0.47826	0.16206	0.90718
Kinesin light chain 4	Kinesin light chain 4	KLC4	PR	0.00106327	0.000281645	0.00187244	na		-0.30036	0.19819	0.4216		0.49166	0.14894	0.99322		0.10706	0.76846	0.93425
Importin subunit alpha-4	Importin subunit alpha-4	KPNA3	PR	0.382366	0.00629298	0.0141399	na		-0.25043	0.28691	0.44464		-0.23264	0.51776	0.99861		0.36832	0.29499	0.90718
Importin subunit alpha-3	Importin subunit alpha-3	KPNA4	PR	0.388802	0.000186953	0.00102787	na		-0.39288	0.086611	0.27796		-0.15642	0.66609	0.99861		0.36264	0.30307	0.90718
Importin subunit alpha-7	Importin subunit alpha-7	KPNA6	PR	0.225061	0.000794377	0.00273913	na		-0.26615	0.2567	0.46404		0.19958	0.5804	0.99322		-0.46871	0.17181	0.93425
Importin subunit beta-1	Importin subunit beta-1	KPNB1	PR	0.450061	0.000648607	0.00236496	na		-0.42181	0.063956	0.26544		-0.13692	0.70604	0.99946		0.28308	0.42805	0.90222
GTPase KRas	GTPase KRas	KRAS	PR	0.664998	0.0100888	0.0204783	0.02		-0.37334	0.10494	0.32131		-0.16242	0.65394	0.99322		0.13445	0.71115	0.93425
Serine beta-lactamase-like protein LACTB, mitochondrial	Serine beta-lactamase-like protein LACTB, mitochondrial	LACTB	PR	0.470185	0.0279084	0.0474714	na		-0.32051	0.16829	0.38727		-0.11201	0.75803	0.99322		0.057026	0.87566	0.95195
Endoribonuclease LACTB2	Endoribonuclease LACTB2	LACTB2	PR	0.186112	0.00602291	0.0136653	na		-0.27072	0.24831	0.46301		0.072043	0.84322	0.99322		0.45778	0.18339	0.93425
Ladinin-1	Ladinin-1	LAD1	PR	0.000387823	0.000149393	0.00187244	0.36		-0.33971	0.14282	0.3243		0.2414	0.50165	0.99861		0.61323	0.059381	0.90718
Ragulator complex protein LAMTOR1	Ragulator complex protein LAMTOR1	LAMTOR1	PR	0.511735	0.00667407	0.0148531	na		-0.33205	0.15263	0.37227		-0.076554	0.83352	0.99322		0.1571	0.66471	0.93425
La-related protein 1	La-related protein 1	LARP1	PR	0.390615	0.00378547	0.00932347	na		-0.10006	0.67467	0.81357		0.33566	0.34302	0.99322		0.4643	0.17643	0.93425
LIM and SH3 domain protein 1	LIM and SH3 domain protein 1	LASP1	PR	0.458574	0.00013876	0.000856561	0.02		-0.27364	0.24304	0.38944		0.37533	0.28518	0.99946		0.21756	0.54598	0.91189
L-lactate dehydrogenase A chain	L-lactate dehydrogenase A chain	LDHA	PR	0.640809	0.00343002	0.0085827	na		-0.29075	0.21364	0.36285		-0.011196	0.97551	0.99946		0.30559	0.39052	0.89588
L-lactate dehydrogenase B chain	L-lactate dehydrogenase B chain	LDHB	PR	0.554414	0.00315493	0.00806195	na		-0.40344	0.077745	0.26544		-0.12013	0.74098	0.99946		-0.023891	0.94777	0.99428
Mitochondrial proton/calcium exchanger protein	Mitochondrial proton/calcium exchanger protein	LETM1	PR	0.142405	1.84711e-05	0.00029469	na		-0.30595	0.18956	0.36001		0.4704	0.17005	0.99861		0.30066	0.39861	0.90718
Galectin-3-binding protein	Galectin-3-binding protein	LGALS3BP	PR	0.594871	0.0103961	0.0209648	na		-0.20792	0.37905	0.49728		0.10305	0.77695	0.99946		-0.060711	0.86768	0.97575
Galectin-9	Galectin-9	LGALS9	PR	0.143188	4.13409e-06	0.000173179	na		-0.23736	0.31361	0.46825		0.35319	0.31677	0.99861		0.21224	0.55607	0.90718
Protein lin-7 homolog C	Protein lin-7 homolog C	LIN7C	PR	0.299906	4.63786e-05	0.000464285	na		-0.23413	0.32045	0.52124		0.18401	0.61084	0.99322		0.025666	0.94389	0.97478
Lamin-B1	Lamin-B1	LMNB1	PR	0.353695	0.000550824	0.00208462	na		-0.31818	0.17158	0.32958		0.06669	0.85476	0.99946		0.42005	0.22682	0.87144
Leucine-rich PPR motif-containing protein, mitochondrial	Leucine-rich PPR motif-containing protein, mitochondrial	LRPPRC	PR	0.16856	3.80839e-05	0.000419361	na		-0.44251	0.05073	0.26544		0.010416	0.97722	0.99946		0.42617	0.21941	0.87144
Leucine-rich repeat-containing protein 47	Leucine-rich repeat-containing protein 47	LRRC47	PR	0.300533	0.000197513	0.00106737	na		-0.22995	0.32942	0.48165		0.20641	0.56722	0.99861		0.36281	0.30283	0.90718
Leucine-rich repeat-containing protein 59	Leucine-rich repeat-containing protein 59	LRRC59	PR	0.271416	0.000351811	0.00154498	na		-0.38472	0.093952	0.26765		0.015891	0.96525	0.99946		0.21405	0.55263	0.91189
U6 snRNA-associated Sm-like protein LSm2	U6 snRNA-associated Sm-like protein LSm2	LSM2	PR	0.380504	0.000265255	0.00128845	na		-0.33566	0.14794	0.36603		-0.03957	0.91358	0.99322		0.17753	0.62366	0.93425
U6 snRNA-associated Sm-like protein LSm8	U6 snRNA-associated Sm-like protein LSm8	LSM8	PR	0.349374	0.00412581	0.00996833	0.02		-0.006497	0.97831	0.98993		0.42545	0.22028	0.99322		0.18677	0.60539	0.93425
Lipolysis-stimulated lipoprotein receptor	Lipolysis-stimulated lipoprotein receptor	LSR	PR	0.0417753	0.00685195	0.0146648	na		-0.41786	0.066751	0.26924		-0.12894	0.72258	0.99322		0.36736	0.29635	0.93425
Putative RNA-binding protein Luc7-like 2	Putative RNA-binding protein Luc7-like 2	LUC7L2	PR	0.274314	4.68986e-05	0.000467814	na		-0.37843	0.099912	0.29005		0.050157	0.89056	0.99861		0.53865	0.10817	0.90718
Luc7-like protein 3	Luc7-like protein 3	LUC7L3	PR	0.198685	0.000172389	0.000972693	na		-0.37184	0.10645	0.32366		-0.11713	0.74727	0.99322		0.26151	0.46548	0.93425
Acyl-protein thioesterase 1	Acyl-protein thioesterase 1	LYPLA1	PR	0.384028	0.00765557	0.0164529	na		-0.3302	0.15507	0.33275		0.0022866	0.995	0.99861		0.21604	0.54885	0.90718
Core histone macro-H2A.1	Core histone macro-H2A.1	MACROH2A1	PR	0.436285	0.0121671	0.0239315	na		-0.28281	0.22697	0.37592		0.040588	0.91136	0.99946		0.37155	0.29045	0.87144
Magnesium transporter protein 1	Magnesium transporter protein 1	MAGT1	PR	0.463599	0.00677706	0.0149916	na		-0.39016	0.08901	0.27796		-0.1814	0.61599	0.99861		0.4209	0.22579	0.90718
Lysosomal alpha-mannosidase	Lysosomal alpha-mannosidase	MAN2B1	PR	0.245745	0.0072626	0.0149711	na		-0.4212	0.064383	0.26523		-0.17417	0.63035	0.99322		0.12146	0.73819	0.93425
Dual specificity mitogen-activated protein kinase kinase 1	Dual specificity mitogen-activated protein kinase kinase 1	MAP2K1	PR	0.345005	0.000329839	0.00187244	na		-0.39297	0.086525	0.27796		-0.10327	0.77648	0.99861		0.34184	0.33364	0.90718
Microtubule-associated protein 4	Microtubule-associated protein 4	MAP4	PR	0.747097	0.00434059	0.0104331	na		-0.16808	0.47874	0.59089		0.39626	0.25694	0.99946		-0.0081432	0.98219	0.99645
Mitogen-activated protein kinase 1	Mitogen-activated protein kinase 1	MAPK1	PR	0.644226	6.11215e-05	0.000540983	na		-0.29362	0.20894	0.36022		0.17338	0.63192	0.99946		0.50655	0.13515	0.87144
Microtubule-associated protein RP/EB family member 1	Microtubule-associated protein RP/EB family member 1	MAPRE1	PR	0.403924	0.000340601	0.00151	na		-0.36085	0.11804	0.28633		0.04939	0.89222	0.99946		0.49535	0.14545	0.87144
Methionine--tRNA ligase, cytoplasmic	Methionine--tRNA ligase, cytoplasmic	MARS1	PR	0.122216	0.00131495	0.00397472	na		-0.23795	0.31239	0.46783		0.3184	0.36992	0.99861		0.014474	0.96834	0.9975
S-adenosylmethionine synthase isoform type-2	S-adenosylmethionine synthase isoform type-2	MAT2A	PR	0.481292	0.00392695	0.00958739	na		-0.26876	0.25189	0.40872		0.079463	0.82727	0.99861		0.28993	0.41646	0.90718
Methionine adenosyltransferase 2 subunit beta	Methionine adenosyltransferase 2 subunit beta	MAT2B	PR	0.264726	2.46214e-06	0.000163732	na		-0.37251	0.10578	0.29363		0.13782	0.70417	0.99861		0.26925	0.45189	0.90718
Matrin-3	Matrin-3	MATR3	PR	0.291916	9.0375e-05	0.000678541	na		-0.3918	0.087552	0.26742		-0.005065	0.98892	0.99946		0.35457	0.31476	0.87144
Muscleblind-like protein 1	Muscleblind-like protein 1	MBNL1	PR	0.503487	0.00323063	0.00821781	na		-0.26917	0.25114	0.46301		0.035224	0.92304	0.99322		0.1092	0.76395	0.93425
Methylcrotonoyl-CoA carboxylase subunit alpha, mitochondrial	Methylcrotonoyl-CoA carboxylase subunit alpha, mitochondrial	MCCC1	PR	0.000564115	0.000149393	0.00187244	0.52		-0.42351	0.062786	0.26514		-0.0046209	0.98989	0.99913		0.23545	0.51257	0.93425
DNA replication licensing factor MCM6	DNA replication licensing factor MCM6	MCM6	PR	0.320196	0.000439639	0.00215423	na		-0.35457	0.12505	0.30727		-0.068905	0.84998	0.99861		0.61778	0.056996	0.90718
Calcium uniporter protein, mitochondrial	Calcium uniporter protein, mitochondrial	MCU	PR	0.000313035	0.00013173	0.00187244	0.7		-0.41173	0.07127	0.2721		0.34829	0.32401	0.99322		0.14268	0.69416	0.93425
Malate dehydrogenase, mitochondrial	Malate dehydrogenase, mitochondrial	MDH2	PR	0.322467	1.24203e-05	0.000264808	na		-0.40569	0.075949	0.26544		0.12823	0.72407	0.99946		0.31571	0.3742	0.89584
Methionine aminopeptidase 1	Methionine aminopeptidase 1	METAP1	PR	0.225626	0.00775506	0.0178271	na		-0.36766	0.11076	0.30022		-0.14459	0.69025	0.99861		0.25904	0.46986	0.90718
Methionine aminopeptidase 2	Methionine aminopeptidase 2	METAP2	PR	0.240592	5.6633e-05	0.000530792	na		-0.26515	0.25857	0.46404		0.27126	0.44839	0.99322		0.3209	0.36596	0.93425
Microsomal glutathione S-transferase 3	Microsomal glutathione S-transferase 3	MGST3	PR	0.586023	0.00253759	0.00681489	na		-0.41132	0.071583	0.27712		-0.097864	0.78796	0.99861		-0.35004	0.32142	0.90718
Macrophage migration inhibitory factor	Macrophage migration inhibitory factor	MIF	PR	0.466513	0.000768539	0.00282438	0.02		-0.40121	0.079554	0.27796		-0.076351	0.83395	0.99861		0.46689	0.1737	0.90718
Mannosyl-oligosaccharide glucosidase	Mannosyl-oligosaccharide glucosidase	MOGS	PR	0.428828	0.00018373	0.00101615	na		-0.43914	0.052724	0.25968		-0.12984	0.72071	0.99861		-0.016916	0.96301	0.9975
Mitochondrial pyruvate carrier 2	Mitochondrial pyruvate carrier 2	MPC2	PR	0.301675	1.98741e-05	0.000306676	na		-0.38554	0.093196	0.30394		0.16535	0.64802	0.99322		-0.30013	0.39947	0.93425
Mannose-P-dolichol utilization defect 1 protein	Mannose-P-dolichol utilization defect 1 protein	MPDU1	PR	0.564641	0.0098143	0.0200375	na		-0.3154	0.17555	0.34625		-0.091191	0.80217	0.99861		0.21446	0.55186	0.90718
3-mercaptopyruvate sulfurtransferase	3-mercaptopyruvate sulfurtransferase	MPST	PR	0.0835253	0.0100413	0.0203967	na		-0.37278	0.10551	0.27904		0.15562	0.66771	0.99946		0.25823	0.4713	0.90225
Macrophage mannose receptor 1	Macrophage mannose receptor 1	MRC1	PR	0.450794	0.0250441	0.0436085	na		-0.3448	0.13654	0.35153		-0.15086	0.67741	0.99322		-0.14319	0.69311	0.93425
Double-strand break repair protein MRE11	Double-strand break repair protein MRE11	MRE11	PR	0.250355	0.00489314	0.0114845	na		-0.07584	0.75065	0.86986		0.2784	0.43605	0.99322		0.43014	0.21469	0.93425
39S ribosomal protein L12, mitochondrial	39S ribosomal protein L12, mitochondrial	MRPL12	PR	0.150082	2.55544e-06	0.000164534	na		-0.31594	0.17477	0.34544		0.12635	0.72797	0.99861		0.50883	0.1331	0.90718
39S ribosomal protein L19, mitochondrial	39S ribosomal protein L19, mitochondrial	MRPL19	PR	0.115963	0.00126041	0.00397472	0.1		-0.26943	0.25067	0.46301		0.18643	0.60606	0.99322		0.32898	0.35331	0.93425
39S ribosomal protein L37, mitochondrial	39S ribosomal protein L37, mitochondrial	MRPL37	PR	0.000786211	0.014719	0.0268343	na		-0.40173	0.079133	0.28271		-0.36184	0.30422	0.99322		-0.11129	0.75955	0.93425
39S ribosomal protein L39, mitochondrial	39S ribosomal protein L39, mitochondrial	MRPL39	PR	0.00132916	0.001444	0.00435069	na		-0.38617	0.092609	0.30318		-0.20436	0.57117	0.99322		0.39381	0.26016	0.93425
39S ribosomal protein L44, mitochondrial	39S ribosomal protein L44, mitochondrial	MRPL44	PR	0.137437	0.00102814	0.00332324	0.04		-0.31213	0.18032	0.39912		0.1388	0.70215	0.99322		0.23203	0.51888	0.93425
39S ribosomal protein L45, mitochondrial	39S ribosomal protein L45, mitochondrial	MRPL45	PR	0.022521	0.0033629	0.00834154	na		-0.36353	0.11514	0.33224		-0.043589	0.90483	0.99322		0.2916	0.41365	0.93425
28S ribosomal protein S22, mitochondrial	28S ribosomal protein S22, mitochondrial	MRPS22	PR	0.12546	0.00859422	0.0175594	0.02		-0.3653	0.11324	0.32962		-0.16566	0.64739	0.99322		0.16566	0.6474	0.93425
28S ribosomal protein S27, mitochondrial	28S ribosomal protein S27, mitochondrial	MRPS27	PR	0.326644	0.00247475	0.00667755	na		-0.037004	0.87691	0.94614		0.31967	0.36791	0.99322		0.41079	0.2383	0.93425
28S ribosomal protein S35, mitochondrial	28S ribosomal protein S35, mitochondrial	MRPS35	PR	0.000992421	0.000121165	0.00187244	0.1		-0.35358	0.12619	0.34427		0.33034	0.3512	0.99322		0.35261	0.31762	0.93425
28S ribosomal protein S6, mitochondrial	28S ribosomal protein S6, mitochondrial	MRPS6	PR	0.00221076	0.0187472	0.0329728	na		-0.18184	0.44291	0.62721		0.33034	0.3512	0.99322		0.12676	0.72713	0.93425
28S ribosomal protein S7, mitochondrial	28S ribosomal protein S7, mitochondrial	MRPS7	PR	0.000518278	0.00100548	0.00333564	na		-0.32948	0.15602	0.3761		0.11337	0.75517	0.99322		0.44839	0.1937	0.93425
28S ribosomal protein S9, mitochondrial	28S ribosomal protein S9, mitochondrial	MRPS9	PR	0.276096	0.00105993	0.00339493	na		-0.2558	0.27635	0.4816		0.13567	0.70863	0.99322		0.33679	0.34131	0.93425
DNA mismatch repair protein Msh2	DNA mismatch repair protein Msh2	MSH2	PR	0.392064	0.0139975	0.0267957	na		-0.43832	0.05322	0.24904		-0.35111	0.31983	0.99322		0.49629	0.14456	0.93425
Mitochondrial carrier homolog 2	Mitochondrial carrier homolog 2	MTCH2	PR	0.429475	0.00478903	0.0113066	na		-0.097108	0.6838	0.7569		0.42488	0.22097	0.99946		0.46065	0.1803	0.87144
C-1-tetrahydrofolate synthase, cytoplasmic	C-1-tetrahydrofolate synthase, cytoplasmic	MTHFD1	PR	0.318966	8.85591e-07	0.000123673	0.12		-0.33154	0.15329	0.31347		0.43719	0.20643	0.99946		0.416	0.2318	0.87144
Exosome RNA helicase MTR4	Exosome RNA helicase MTR4	MTREX	PR	0.000593324	0.00203602	0.00576151	0.08		-0.29863	0.20091	0.42376		0.2019	0.57591	0.99322		0.075458	0.83587	0.9493
Metaxin-1	Metaxin-1	MTX1	PR	0.00077595	0.00100548	0.00333564	0.02		-0.30027	0.19834	0.4216		0.21077	0.55889	0.99322		0.45267	0.18896	0.93425
Major vault protein	Major vault protein	MVP	PR	0.391986	0.000182866	0.00101338	na		-0.30235	0.19509	0.3508		0.13453	0.71099	0.99946		0.31565	0.3743	0.89584
Myb-binding protein 1A	Myb-binding protein 1A	MYBBP1A	PR	0.371805	0.00717764	0.0156252	na		-0.27499	0.24064	0.4038		-0.044733	0.90234	0.99861		0.050034	0.89082	0.98776
UPF0160 protein MYG1, mitochondrial	UPF0160 protein MYG1, mitochondrial	MYG1	PR	0.162882	0.000768539	0.00282438	na		-0.25276	0.28229	0.4861		0.30051	0.39885	0.99322		-0.13314	0.71385	0.93425
Myosin-9	Myosin-9	MYH9	PR	0.601732	0.00609301	0.0137796	na		-0.30828	0.18604	0.34124		-0.070587	0.84636	0.99946		0.4883	0.15216	0.87144
Myosin regulatory light chain 12B	Myosin regulatory light chain 12B	MYL12B	PR	0.712986	0.0049819	0.011683	na		-0.29103	0.21317	0.36285		-0.041051	0.91035	0.99946		0.41765	0.22977	0.87144
Unconventional myosin-Ib	Unconventional myosin-Ib	MYO1B	PR	0.267104	0.00441352	0.0105811	na		-0.19386	0.41282	0.59838		0.16741	0.64388	0.99322		0.22825	0.52591	0.93425
Unconventional myosin-Id	Unconventional myosin-Id	MYO1D	PR	0.574026	0.0129996	0.0251963	na		-0.33399	0.1501	0.32562		-0.050339	0.89016	0.99861		-0.13324	0.71366	0.95684
Unconventional myosin-VI	Unconventional myosin-VI	MYO6	PR	0.0642735	0.000754541	0.00282438	0.02		-0.40496	0.076528	0.27646		-0.091059	0.80245	0.99322		0.49984	0.14126	0.93425
N-alpha-acetyltransferase 10	N-alpha-acetyltransferase 10	NAA10	PR	0.154571	0.000168702	0.000956679	na		-0.41633	0.067859	0.26924		-0.055611	0.87873	0.99322		0.43261	0.21178	0.93425
N-alpha-acetyltransferase 15, NatA auxiliary subunit	N-alpha-acetyltransferase 15, NatA auxiliary subunit	NAA15	PR	0.291022	0.0091085	0.0179029	na		-0.23937	0.30942	0.465		0.09184	0.80079	0.99861		0.40661	0.24359	0.90718
Nascent polypeptide-associated complex subunit alpha, muscle-specific form	Nascent polypeptide-associated complex subunit alpha, muscle-specific form	NACA	PR	0.290616	1.21487e-05	0.000261009	na		-0.40608	0.075639	0.26544		0.06896	0.84987	0.99946		0.43384	0.21033	0.87144
Nucleosome assembly protein 1-like 1	Nucleosome assembly protein 1-like 1	NAP1L1	PR	0.233429	0.0013222	0.00405813	na		-0.3563	0.12309	0.29279		-0.011657	0.9745	0.99946		0.43695	0.2067	0.87144
Nucleosome assembly protein 1-like 4	Nucleosome assembly protein 1-like 4	NAP1L4	PR	0.310123	2.52827e-05	0.000357783	na		-0.41941	0.065646	0.26544		0.015629	0.96582	0.99946		0.40953	0.23989	0.87144
Alpha-soluble NSF attachment protein	Alpha-soluble NSF attachment protein	NAPA	PR	0.561241	0.000203206	0.00108935	na		-0.22411	0.34217	0.46528		0.45998	0.18102	0.99946		0.10957	0.76317	0.95878
Nicotinate phosphoribosyltransferase	Nicotinate phosphoribosyltransferase	NAPRT	PR	0.291286	0.000651342	0.00236875	na		-0.35958	0.11943	0.30626		-0.010816	0.97634	0.99861		0.39357	0.26049	0.90718
Asparagine--tRNA ligase, cytoplasmic	Asparagine--tRNA ligase, cytoplasmic	NARS1	PR	0.469372	0.00289167	0.00758351	na		-0.28582	0.22185	0.37143		0.1258	0.72913	0.99946		0.38677	0.26954	0.87144
Neutral cholesterol ester hydrolase 1	Neutral cholesterol ester hydrolase 1	NCEH1	PR	0.225262	2.55557e-05	0.000358679	na		-0.35308	0.12676	0.34427		0.12273	0.73555	0.99322		0.052106	0.88633	0.95844
Nucleolin	Nucleolin	NCL	PR	0.199227	5.55209e-05	0.000523762	na		-0.40795	0.074174	0.26544		0.10253	0.77806	0.99946		0.45954	0.18149	0.87144
Nicalin	Nicalin	NCLN	PR	0.616212	0.0126428	0.0246588	na		-0.047704	0.8417	0.92672		0.24127	0.50188	0.99322		0.21221	0.55613	0.93425
Protein NDRG1	Protein NDRG1	NDRG1	PR	0.505926	0.000191768	0.00104755	0.02		-0.43531	0.055069	0.26544		-0.12917	0.7221	0.99946		0.18938	0.60028	0.91645
NADH dehydrogenase [ubiquinone] 1 alpha subcomplex subunit 10, mitochondrial	NADH dehydrogenase [ubiquinone] 1 alpha subcomplex subunit 10, mitochondrial	NDUFA10	PR	0.412448	0.000109049	0.00075018	na		-0.19524	0.40943	0.55814		0.37087	0.2914	0.99861		-0.31378	0.37729	0.90718
NADH dehydrogenase [ubiquinone] 1 alpha subcomplex subunit 12	NADH dehydrogenase [ubiquinone] 1 alpha subcomplex subunit 12	NDUFA12	PR	0.239423	0.00254908	0.0068326	na		-0.42796	0.059783	0.26483		-0.14001	0.69967	0.99861		0.10891	0.76456	0.96153
NADH dehydrogenase [ubiquinone] 1 alpha subcomplex subunit 13	NADH dehydrogenase [ubiquinone] 1 alpha subcomplex subunit 13	NDUFA13	PR	0.320325	0.0131808	0.0254416	na		-0.01009	0.96632	0.98629		0.47396	0.1664	0.99322		0.13994	0.69981	0.93425
NADH dehydrogenase [ubiquinone] 1 alpha subcomplex subunit 5	NADH dehydrogenase [ubiquinone] 1 alpha subcomplex subunit 5	NDUFA5	PR	0.332531	0.000346895	0.00153061	na		-0.36423	0.11438	0.30431		0.032494	0.92899	0.99861		0.23248	0.51806	0.90718
Acyl carrier protein, mitochondrial	Acyl carrier protein, mitochondrial	NDUFAB1	PR	0.376217	0.000246128	0.00187244	na		-0.41818	0.066524	0.27166		-0.042142	0.90798	0.99861		0.21341	0.55386	0.90718
NADH dehydrogenase [ubiquinone] 1 alpha subcomplex assembly factor 2	NADH dehydrogenase [ubiquinone] 1 alpha subcomplex assembly factor 2	NDUFAF2	PR	0.145373	0.0123256	0.0241751	na		-0.25987	0.26851	0.47278		0.20858	0.56306	0.99322		0.19978	0.58002	0.93425
NADH dehydrogenase [ubiquinone] 1 beta subcomplex subunit 10	NADH dehydrogenase [ubiquinone] 1 beta subcomplex subunit 10	NDUFB10	PR	0.258493	5.10093e-06	0.000189158	na		-0.34293	0.13882	0.32092		0.079537	0.82711	0.99861		-0.094069	0.79604	0.96153
NADH dehydrogenase [ubiquinone] 1 beta subcomplex subunit 4	NADH dehydrogenase [ubiquinone] 1 beta subcomplex subunit 4	NDUFB4	PR	0.362962	9.14039e-06	0.000234217	0.02		-0.4138	0.069724	0.27042		0.078136	0.83012	0.99322		-0.31077	0.38213	0.93425
NADH-ubiquinone oxidoreductase 75 kDa subunit, mitochondrial	NADH-ubiquinone oxidoreductase 75 kDa subunit, mitochondrial	NDUFS1	PR	0.556426	0.003667	0.00907973	na		-0.25248	0.28285	0.42185		0.39562	0.25778	0.99946		-0.21495	0.55092	0.91189
NADH dehydrogenase [ubiquinone] iron-sulfur protein 3, mitochondrial	NADH dehydrogenase [ubiquinone] iron-sulfur protein 3, mitochondrial	NDUFS3	PR	0.500319	0.000227163	0.00116276	na		-0.27917	0.23327	0.39897		0.26132	0.46582	0.99861		0.049464	0.89206	0.98776
NADH dehydrogenase [ubiquinone] iron-sulfur protein 5	NADH dehydrogenase [ubiquinone] iron-sulfur protein 5	NDUFS5	PR	0.438735	0.00239092	0.00653907	na		-0.37571	0.10258	0.2908		-0.053985	0.88225	0.99861		-0.33473	0.34446	0.90718
NADH dehydrogenase [ubiquinone] iron-sulfur protein 8, mitochondrial	NADH dehydrogenase [ubiquinone] iron-sulfur protein 8, mitochondrial	NDUFS8	PR	0.413941	0.00828758	0.0175757	na		-0.26397	0.26076	0.41777		0.18418	0.6105	0.99861		-0.12906	0.72233	0.95684
NADH dehydrogenase [ubiquinone] flavoprotein 1, mitochondrial	NADH dehydrogenase [ubiquinone] flavoprotein 1, mitochondrial	NDUFV1	PR	0.46316	0.00213586	0.0059834	na		-0.14008	0.55584	0.6762		0.56734	0.087172	0.99861		-0.26112	0.46617	0.90718
NADH dehydrogenase [ubiquinone] flavoprotein 2, mitochondrial	NADH dehydrogenase [ubiquinone] flavoprotein 2, mitochondrial	NDUFV2	PR	0.582862	0.00579536	0.0125088	na		-0.19135	0.419	0.56619		0.26019	0.46783	0.99861		-0.36691	0.29699	0.90718
Niban-like protein 1	Niban-like protein 1	NIBAN2	PR	0.297219	5.5127e-06	0.000189158	na		-0.18102	0.44501	0.58102		0.5804	0.078556	0.99861		0.46163	0.17926	0.90718
Protein NipSnap homolog 1	Protein NipSnap homolog 1	NIPSNAP1	PR	0.115601	3.26615e-06	0.000170732	0.06		-0.34644	0.13456	0.31859		0.10009	0.78323	0.99861		0.28837	0.41909	0.90718
Protein NipSnap homolog 3A	Protein NipSnap homolog 3A	NIPSNAP3A	PR	0.513352	0.0118976	0.023484	na		-0.35005	0.13027	0.31448		-0.10811	0.76625	0.99861		0.11635	0.74891	0.96153
Nucleoside diphosphate kinase A	Nucleoside diphosphate kinase A	NME1	PR	0.320243	0.00131447	0.00404988	na		-0.24325	0.30141	0.43696		0.25099	0.48426	0.99946		0.27376	0.44404	0.90222
Nucleoside diphosphate kinase B	Nucleoside diphosphate kinase B	NME2	PR	0.412456	0.000201958	0.00108475	na		-0.43247	0.056852	0.26544		-0.10097	0.78137	0.99946		0.18181	0.61518	0.91714
Glycylpeptide N-tetradecanoyltransferase 1	Glycylpeptide N-tetradecanoyltransferase 1	NMT1	PR	0.278409	0.00282727	0.00705051	na		-0.30524	0.19065	0.36001		0.0078142	0.98291	0.99861		0.52872	0.11612	0.90718
Nucleolar complex protein 2 homolog	Nucleolar complex protein 2 homolog	NOC2L	PR	0.000836329	0.000151974	0.00187244	0.28		-0.33649	0.14689	0.36552		0.49519	0.14559	0.99322		0.091887	0.80068	0.93737
Nucleolar and coiled-body phosphoprotein 1	Nucleolar and coiled-body phosphoprotein 1	NOLC1	PR	0.419566	0.00819095	0.0174636	na		-0.32337	0.16431	0.33941		-0.19137	0.59638	0.99861		0.59027	0.072422	0.90718
Non-POU domain-containing octamer-binding protein	Non-POU domain-containing octamer-binding protein	NONO	PR	0.365917	0.000512981	0.00198168	na		-0.23664	0.31514	0.445		0.22952	0.52355	0.99946		0.32108	0.36568	0.88984
Probable 28S rRNA (cytosine(4447)-C(5))-methyltransferase	Probable 28S rRNA (cytosine(4447)-C(5))-methyltransferase	NOP2	PR	0.109664	0.000498747	0.00195098	na		-0.41097	0.071848	0.2721		-0.092732	0.79889	0.99322		0.50958	0.13244	0.93425
Nucleolar protein 58	Nucleolar protein 58	NOP58	PR	0.387994	0.000555262	0.00209574	na		-0.33804	0.14491	0.31007		0.0015341	0.99664	0.99946		0.259	0.46994	0.90225
Puromycin-sensitive aminopeptidase	Puromycin-sensitive aminopeptidase	NPEPPS	PR	0.616455	0.000889268	0.00298525	na		-0.38768	0.091233	0.26742		0.010215	0.97766	0.99946		-0.19551	0.58829	0.91645
Nuclear protein localization protein 4 homolog	Nuclear protein localization protein 4 homolog	NPLOC4	PR	0.259053	0.000764504	0.00266785	na		-0.18256	0.44107	0.62617		0.13714	0.70558	0.99322		0.30961	0.384	0.93425
Nucleophosmin	Nucleophosmin	NPM1	PR	0.27846	3.97376e-05	0.000425238	na		-0.43633	0.054434	0.26544		-0.074212	0.83855	0.99946		0.32429	0.36063	0.88984
NSFL1 cofactor p47	NSFL1 cofactor p47	NSFL1C	PR	0.427109	0.000247714	0.00124185	na		-0.41708	0.067318	0.2737		-0.15687	0.66516	0.99861		0.39534	0.25815	0.90718
tRNA (cytosine(34)-C(5))-methyltransferase	tRNA (cytosine(34)-C(5))-methyltransferase	NSUN2	PR	0.297539	0.000822279	0.00280692	na		-0.43467	0.055466	0.25968		-0.123	0.73497	0.99861		0.083604	0.81839	0.96557
5'(3')-deoxyribonucleotidase, cytosolic type	5'(3')-deoxyribonucleotidase, cytosolic type	NT5C	PR	0.289835	0.00259064	0.00693071	na		-0.14204	0.55026	0.71351		0.27476	0.44231	0.99322		0.43422	0.20988	0.93425
Bis(5'-nucleosyl)-tetraphosphatase [asymmetrical]	Bis(5'-nucleosyl)-tetraphosphatase [asymmetrical]	NUDT2	PR	0.0955965	0.000754541	0.00282438	na		-0.42674	0.060594	0.26159		-0.067539	0.85293	0.99322		0.043654	0.90469	0.96764
Diphosphoinositol polyphosphate phosphohydrolase 2	Diphosphoinositol polyphosphate phosphohydrolase 2	NUDT4	PR	0.134136	6.7699e-05	0.000566117	na		-0.38726	0.091622	0.30279		0.013502	0.97047	0.99591		0.41522	0.23277	0.93425
ADP-sugar pyrophosphatase	ADP-sugar pyrophosphatase	NUDT5	PR	0.271652	0.000550258	0.00208462	na		-0.43473	0.055428	0.25968		-0.16675	0.64521	0.99861		0.49493	0.14584	0.90718
Nuclear mitotic apparatus protein 1	Nuclear mitotic apparatus protein 1	NUMA1	PR	0.427804	0.00172407	0.00504127	na		-0.26251	0.26351	0.40861		0.17026	0.63817	0.99946		0.42533	0.22042	0.87144
Nuclear pore complex protein Nup133	Nuclear pore complex protein Nup133	NUP133	PR	0.00238323	0.000420701	0.00215423	na		-0.31512	0.17596	0.3987		0.33034	0.3512	0.99322		0.21361	0.55348	0.93425
Nuclear pore complex protein Nup205	Nuclear pore complex protein Nup205	NUP205	PR	0.107213	0.000235327	0.00119287	na		-0.27148	0.24693	0.40529		0.31465	0.37589	0.99861		0.25648	0.47442	0.90718
Nuclear pore glycoprotein p62	Nuclear pore glycoprotein p62	NUP62	PR	0.149074	0.000384606	0.00238073	na		-0.41667	0.067612	0.26924		-0.089392	0.80601	0.99322		0.41027	0.23895	0.93425
Nuclear pore complex protein Nup85	Nuclear pore complex protein Nup85	NUP85	PR	0.139174	0.0133068	0.0250275	na		-0.39939	0.081056	0.28476		-0.32643	0.35729	0.99322		0.42993	0.21494	0.93425
Nuclear pore complex protein Nup93	Nuclear pore complex protein Nup93	NUP93	PR	0.39301	0.00262319	0.00699767	na		-0.10609	0.6562	0.75471		0.26561	0.45826	0.99861		0.35868	0.30877	0.90718
Ornithine aminotransferase, mitochondrial	Ornithine aminotransferase, mitochondrial	OAT	PR	0.374897	0.00320106	0.00815744	na		-0.29978	0.1991	0.36332		-0.020084	0.95608	0.99861		0.20685	0.56639	0.91234
OCIA domain-containing protein 2	OCIA domain-containing protein 2	OCIAD2	PR	0.136503	0.00339023	0.00962886	na		-0.12611	0.59625	0.70746		0.46065	0.18031	0.99861		0.22688	0.52846	0.90718
Opioid growth factor receptor	Opioid growth factor receptor	OGFR	PR	0.00101689	0.00247812	0.00651731	na		-0.38332	0.095257	0.30603		-0.039844	0.91298	0.99322		0.17621	0.62629	0.93425
Obg-like ATPase 1	Obg-like ATPase 1	OLA1	PR	0.456514	0.00197618	0.00565521	na		-0.29576	0.20549	0.35926		0.16704	0.64463	0.99946		0.25541	0.47634	0.90225
5-oxoprolinase	5-oxoprolinase	OPLAH	PR	0.0129983	0.00459001	0.0104738	na		-0.27703	0.23703	0.45959		0.055266	0.87947	0.99322		0.47336	0.16701	0.93425
Oxysterol-binding protein-related protein 8	Oxysterol-binding protein-related protein 8	OSBPL8	PR	0.396123	0.010775	0.0216042	na		-0.2093	0.37583	0.57272		-0.16194	0.6549	0.99322		0.22483	0.53231	0.93425
Proliferation-associated protein 2G4	Proliferation-associated protein 2G4	PA2G4	PR	0.408699	0.000348435	0.00153498	na		-0.39576	0.084121	0.26544		-0.076213	0.83425	0.99946		0.50889	0.13305	0.87144
Protein kinase C and casein kinase substrate in neurons protein 2	Protein kinase C and casein kinase substrate in neurons protein 2	PACSIN2	PR	0.498067	9.27595e-06	0.000234217	na		-0.24426	0.29935	0.45641		0.28344	0.42742	0.99861		0.41896	0.22815	0.90718
Platelet-activating factor acetylhydrolase IB subunit beta	Platelet-activating factor acetylhydrolase IB subunit beta	PAFAH1B2	PR	0.479792	0.00101283	0.00329483	na		-0.25746	0.27314	0.43033		0.17863	0.62149	0.99861		0.15045	0.67824	0.94918
Platelet-activating factor acetylhydrolase IB subunit gamma	Platelet-activating factor acetylhydrolase IB subunit gamma	PAFAH1B3	PR	0.233921	0.00425433	0.0102611	na		-0.27422	0.242	0.40397		0.24259	0.49948	0.99861		0.52383	0.12017	0.90718
Multifunctional protein ADE2	Multifunctional protein ADE2	PAICS	PR	0.285229	0.000182672	0.00187244	0.04		-0.42173	0.064016	0.26544		0.10885	0.76469	0.99946		0.087803	0.8094	0.96763
Polyadenylate-binding protein-interacting protein 1	Polyadenylate-binding protein-interacting protein 1	PAIP1	PR	0.455151	0.0113297	0.0214389	na		-0.27012	0.24941	0.46301		-0.055762	0.8784	0.99322		0.16087	0.65707	0.93425
Bifunctional 3'-phosphoadenosine 5'-phosphosulfate synthase 1	Bifunctional 3'-phosphoadenosine 5'-phosphosulfate synthase 1	PAPSS1	PR	0.336701	0.0222111	0.0392879	na		-0.35988	0.1191	0.33573		-0.066848	0.85442	0.99322		-0.13113	0.71804	0.93425
Bifunctional 3'-phosphoadenosine 5'-phosphosulfate synthase 2	Bifunctional 3'-phosphoadenosine 5'-phosphosulfate synthase 2	PAPSS2	PR	0.343629	0.0263043	0.0453225	na		-0.17421	0.46259	0.59476		0.20848	0.56327	0.99861		-0.23473	0.51389	0.90718
Protein/nucleic acid deglycase DJ-1	Protein/nucleic acid deglycase DJ-1	PARK7	PR	0.669075	0.000909143	0.00303374	na		-0.33432	0.14967	0.3114		0.1769	0.62492	0.99946		-0.053024	0.88433	0.97634
Poly [ADP-ribose] polymerase 1	Poly [ADP-ribose] polymerase 1	PARP1	PR	0.250486	0.000820681	0.00280659	na		-0.3977	0.082473	0.26544		-0.037199	0.91874	0.99946		0.51012	0.13196	0.87144
Protein mono-ADP-ribosyltransferase PARP14	Protein mono-ADP-ribosyltransferase PARP14	PARP14	PR	0.302076	0.00228308	0.00630727	na		-0.21143	0.37087	0.56916		0.15267	0.67371	0.99322		0.37547	0.28499	0.93425
Protein mono-ADP-ribosyltransferase PARP4	Protein mono-ADP-ribosyltransferase PARP4	PARP4	PR	0.335702	0.0103118	0.020855	na		-0.072025	0.76284	0.87808		0.24267	0.49933	0.99322		0.18698	0.60498	0.93425
Protein PAXX	Protein PAXX	PAXX	PR	0.220615	0.000168232	0.000956679	na		-0.25326	0.28132	0.48562		0.27689	0.43865	0.99322		0.21941	0.54248	0.93425
Pterin-4-alpha-carbinolamine dehydratase	Pterin-4-alpha-carbinolamine dehydratase	PCBD1	PR	0.385234	0.00200511	0.0057132	na		-0.28378	0.22532	0.38897		0.23687	0.50995	0.99861		0.19411	0.59102	0.92036
Poly(rC)-binding protein 2	Poly(rC)-binding protein 2	PCBP2	PR	0.365066	9.35842e-05	0.000687844	na		-0.31806	0.17175	0.32958		0.23866	0.50666	0.99946		0.22147	0.53861	0.91189
Poly(rC)-binding protein 3	Poly(rC)-binding protein 3	PCBP3	PR	0.000415122	0.000149393	0.00187244	0.04		-0.38677	0.092062	0.26751		0.1299	0.72059	0.99946		0.14885	0.68151	0.94091
Propionyl-CoA carboxylase beta chain, mitochondrial	Propionyl-CoA carboxylase beta chain, mitochondrial	PCCB	PR	0.236899	0.000824674	0.00367804	na		-0.26929	0.25092	0.46301		0.17985	0.61907	0.99322		-0.0036035	0.99212	0.99559
Phosphoenolpyruvate carboxykinase [GTP], mitochondrial	Phosphoenolpyruvate carboxykinase [GTP], mitochondrial	PCK2	PR	0.236977	5.44316e-07	0.000101352	na		-0.31674	0.17363	0.34537		0.18122	0.61634	0.99861		0.052078	0.88639	0.98776
Proliferating cell nuclear antigen	Proliferating cell nuclear antigen	PCNA	PR	0.185344	5.48376e-05	0.000520957	na		-0.42518	0.061646	0.26544		0.054751	0.88059	0.99946		0.43215	0.21232	0.87144
Choline-phosphate cytidylyltransferase A	Choline-phosphate cytidylyltransferase A	PCYT1A	PR	0.327897	0.00025925	0.00127033	na		-0.43362	0.056125	0.25541		-0.14308	0.69334	0.99322		0.32178	0.36457	0.93425
28 kDa heat- and acid-stable phosphoprotein	28 kDa heat- and acid-stable phosphoprotein	PDAP1	PR	0.639232	0.0147823	0.0295645	na		-0.39056	0.088647	0.27796		-0.59982	0.066792	0.99861		0.27724	0.43803	0.90718
Programmed cell death protein 10	Programmed cell death protein 10	PDCD10	PR	0.250973	3.03492e-06	0.000169531	na		-0.33423	0.14978	0.32562		0.15942	0.65999	0.99861		0.43642	0.20733	0.90718
Protein RRP5 homolog	Protein RRP5 homolog	PDCD11	PR	0.103467	0.00452543	0.0104738	na		-0.15275	0.52028	0.68917		0.32244	0.36353	0.99322		0.36055	0.30608	0.93425
Programmed cell death protein 4	Programmed cell death protein 4	PDCD4	PR	0.099316	0.000191537	0.00170256	0.16		-0.36561	0.11291	0.30426		0.44406	0.19857	0.99861		-0.26971	0.45109	0.90718
Programmed cell death protein 5	Programmed cell death protein 5	PDCD5	PR	0.589178	0.0160608	0.030248	na		-0.31846	0.17118	0.34273		-0.14141	0.69677	0.99861		0.010313	0.97744	0.9975
Programmed cell death protein 6	Programmed cell death protein 6	PDCD6	PR	0.432113	1.77265e-05	0.00029469	na		-0.3624	0.11636	0.30572		0.25914	0.46969	0.99861		0.32097	0.36584	0.90718
Programmed cell death 6-interacting protein	Programmed cell death 6-interacting protein	PDCD6IP	PR	0.46308	1.36356e-06	0.000140326	na		-0.2715	0.2469	0.39279		0.46643	0.17419	0.99946		0.33978	0.33676	0.87144
2',5'-phosphodiesterase 12	2',5'-phosphodiesterase 12	PDE12	PR	0.17983	0.00115158	0.00360982	na		-0.25455	0.27879	0.43656		0.29161	0.41363	0.99861		0.3911	0.26375	0.90718
Protein disulfide-isomerase A3	Protein disulfide-isomerase A3	PDIA3	PR	0.547072	0.000507529	0.00196879	na		-0.33265	0.15184	0.31328		-0.0071191	0.98443	0.99946		0.39842	0.25412	0.87144
PDZ and LIM domain protein 1	PDZ and LIM domain protein 1	PDLIM1	PR	0.375178	3.94606e-05	0.000423898	na		-0.35583	0.12362	0.29333		0.15658	0.66576	0.99946		0.24892	0.48799	0.90225
[Pyruvate dehydrogenase [acetyl-transferring]]-phosphatase 1, mitochondrial	[Pyruvate dehydrogenase [acetyl-transferring]]-phosphatase 1, mitochondrial	PDP1	PR	0.000757483	0.00102874	0.00339629	na		-0.32771	0.15839	0.37988		0.1131	0.75573	0.99322		0.32363	0.36166	0.93425
Sister chromatid cohesion protein PDS5 homolog B	Sister chromatid cohesion protein PDS5 homolog B	PDS5B	PR	0.328187	0.00999919	0.0203259	na		-0.31221	0.1802	0.39912		-0.1138	0.75425	0.99322		0.44263	0.20019	0.93425
Pyridoxal-dependent decarboxylase domain-containing protein 1	Pyridoxal-dependent decarboxylase domain-containing protein 1	PDXDC1	PR	0.478065	0.0124135	0.0242963	na		-0.18128	0.44434	0.58102		0.31427	0.3765	0.99861		-0.18388	0.6111	0.92971
Pyridoxal kinase	Pyridoxal kinase	PDXK	PR	0.429635	0.000726955	0.00257549	na		-0.37145	0.10685	0.27904		-0.060443	0.86826	0.99946		0.35418	0.31533	0.87144
Phosphatidylethanolamine-binding protein 1	Phosphatidylethanolamine-binding protein 1	PEBP1	PR	0.691912	0.00857881	0.0180562	na		-0.23011	0.32906	0.45761		0.28245	0.42911	0.99946		-0.26218	0.46431	0.90225
Peflin	Peflin	PEF1	PR	0.535143	0.0257481	0.0426792	na		-0.18727	0.42917	0.57409		0.19203	0.59509	0.99861		0.15917	0.66051	0.94285
Xaa-Pro dipeptidase	Xaa-Pro dipeptidase	PEPD	PR	0.365615	0.000561083	0.00210632	na		-0.31456	0.17677	0.34791		0.068478	0.8509	0.99861		0.1297	0.721	0.95684
Prefoldin subunit 1	Prefoldin subunit 1	PFDN1	PR	0.254404	0.00154628	0.00460422	na		-0.41674	0.06756	0.26924		-0.15751	0.66386	0.99322		0.37996	0.27879	0.93425
Prefoldin subunit 6	Prefoldin subunit 6	PFDN6	PR	0.25792	2.71174e-05	0.000369199	na		-0.40476	0.076686	0.27646		0.051838	0.88691	0.99322		0.39666	0.25643	0.93425
ATP-dependent 6-phosphofructokinase, liver type	ATP-dependent 6-phosphofructokinase, liver type	PFKL	PR	0.398752	1.99741e-06	0.00015809	na		-0.38575	0.092995	0.26751		0.031227	0.93176	0.99946		0.19154	0.59605	0.91645
6-phosphogluconolactonase	6-phosphogluconolactonase	PGLS	PR	0.49569	1.54723e-05	0.000290154	na		-0.43804	0.05339	0.26544		-0.081665	0.82254	0.99946		-0.10579	0.77115	0.95976
Phosphoacetylglucosamine mutase	Phosphoacetylglucosamine mutase	PGM3	PR	0.531487	0.00058284	0.00242604	na		-0.37588	0.10241	0.2908		-0.1013	0.78068	0.99861		-0.04337	0.90531	0.98874
Membrane-associated progesterone receptor component 1	Membrane-associated progesterone receptor component 1	PGRMC1	PR	0.393749	0.000152379	0.000911338	na		-0.14956	0.52913	0.63547		0.52872	0.11612	0.99946		0.6309	0.050472	0.87144
Prohibitin-2	Prohibitin-2	PHB2	PR	0.377333	3.91686e-05	0.000423838	na		-0.30269	0.19457	0.35052		0.32681	0.35668	0.99946		0.33332	0.34661	0.87592
PHD finger-like domain-containing protein 5A	PHD finger-like domain-containing protein 5A	PHF5A	PR	0.24752	0.00209903	0.0059218	na		-0.37932	0.099051	0.31354		-0.24794	0.48977	0.99322		0.30425	0.39272	0.93425
D-3-phosphoglycerate dehydrogenase	D-3-phosphoglycerate dehydrogenase	PHGDH	PR	0.268993	0.000211657	0.00111539	na		-0.22942	0.33056	0.45761		0.43201	0.21248	0.99946		0.56567	0.08832	0.87144
Presequence protease, mitochondrial	Presequence protease, mitochondrial	PITRM1	PR	0.0966769	0.00176343	0.00512513	na		-0.43049	0.058125	0.26232		-0.028048	0.93869	0.99861		0.073976	0.83906	0.97749
Pyruvate kinase PKM	Pyruvate kinase PKM	PKM	PR	0.587617	0.00579536	0.0125088	na		-0.35385	0.12587	0.29592		-0.10699	0.76863	0.99946		0.3808	0.27765	0.87144
Plakophilin-2	Plakophilin-2	PKP2	PR	0.214018	0.00282727	0.00705051	0.04		-0.074628	0.75451	0.83664		0.52505	0.11914	0.99861		-0.068529	0.8508	0.98006
Phospholipase A-2-activating protein	Phospholipase A-2-activating protein	PLAA	PR	0.244805	0.0257481	0.0426792	na		-0.11719	0.62268	0.76935		0.25832	0.47114	0.99322		0.12543	0.72991	0.93425
1-phosphatidylinositol 4,5-bisphosphate phosphodiesterase beta-3	1-phosphatidylinositol 4,5-bisphosphate phosphodiesterase beta-3	PLCB3	PR	0.135885	0.0136609	0.0256088	0.02		-0.25464	0.27861	0.48267		0.010513	0.97701	0.99731		0.18775	0.60347	0.93425
Phospholipase D3	Phospholipase D3	PLD3	PR	0.498781	0.0114155	0.0226768	na		-0.30309	0.19395	0.36332		0.035786	0.92182	0.99861		-0.37292	0.28854	0.90718
Perilipin-1	Perilipin-1	PLIN1	PR	0.00169839	0.0235199	0.0399095	0.12		-0.11779	0.62091	0.76921		0.30058	0.39873	0.99322		-0.02003	0.9562	0.97512
Plastin-1	Plastin-1	PLS1	PR	0.227556	0.000280977	0.00133237	na		-0.31538	0.17559	0.33423		0.12482	0.73117	0.99946		0.26213	0.46439	0.90225
Plastin-3	Plastin-3	PLS3	PR	0.537831	0.0082708	0.0175582	na		-0.32242	0.16562	0.32584		0.034424	0.92479	0.99946		-0.23708	0.50958	0.90447
Protein PML	Protein PML	PML	PR	0.323534	0.0091085	0.0179029	na		-0.35144	0.12866	0.31319		0.027959	0.93889	0.99861		-0.24834	0.48905	0.90718
Mitochondrial-processing peptidase subunit alpha	Mitochondrial-processing peptidase subunit alpha	PMPCA	PR	0.167979	0.000177928	0.000993907	na		-0.43522	0.055126	0.25968		-0.11733	0.74684	0.99861		0.38126	0.27702	0.90718
Mitochondrial-processing peptidase subunit beta	Mitochondrial-processing peptidase subunit beta	PMPCB	PR	0.123275	0.000217988	0.0011374	na		-0.39321	0.086317	0.27796		0.10921	0.76393	0.99861		0.16791	0.64287	0.94285
Polymerase delta-interacting protein 2	Polymerase delta-interacting protein 2	POLDIP2	PR	0.170588	3.08657e-05	0.000375043	na		-0.44066	0.051819	0.24417		-0.10351	0.77598	0.99322		0.50627	0.1354	0.93425
DNA-directed RNA polymerase II subunit RPB1	DNA-directed RNA polymerase II subunit RPB1	POLR2A	PR	0.204154	0.0121492	0.0239132	na		-0.19525	0.40939	0.59529		0.20586	0.56828	0.99322		0.20931	0.56168	0.93425
DNA-directed RNA polymerase II subunit RPB2	DNA-directed RNA polymerase II subunit RPB2	POLR2B	PR	0.358511	0.00468568	0.0110881	na		-0.36523	0.11332	0.32962		-0.18962	0.5998	0.99322		0.26521	0.45897	0.93425
Serum paraoxonase/arylesterase 2	Serum paraoxonase/arylesterase 2	PON2	PR	0.132764	0.000305954	0.00141011	na		-0.36426	0.11435	0.30431		0.097963	0.78775	0.99861		0.09165	0.80119	0.96153
NADPH--cytochrome P450 reductase	NADPH--cytochrome P450 reductase	POR	PR	0.185261	0.000665256	0.00239715	0.1		-0.35659	0.12276	0.30696		0.23785	0.50815	0.99861		0.30629	0.38939	0.90718
Inorganic pyrophosphatase	Inorganic pyrophosphatase	PPA1	PR	0.283047	0.000300652	0.00139488	na		-0.40069	0.079984	0.26544		0.0025487	0.99442	0.99946		0.30039	0.39905	0.89588
Inorganic pyrophosphatase 2, mitochondrial	Inorganic pyrophosphatase 2, mitochondrial	PPA2	PR	0.43577	0.000397111	0.00166536	na		-0.18506	0.43474	0.55044		0.58844	0.073533	0.99946		0.21526	0.55035	0.91189
Protein phosphatase 1A	Protein phosphatase 1A	PPM1A	PR	0.37375	9.75867e-05	0.000702473	na		-0.39149	0.087825	0.29654		-0.1303	0.71977	0.99322		0.30509	0.39134	0.93425
Protein phosphatase methylesterase 1	Protein phosphatase methylesterase 1	PPME1	PR	0.260638	0.000381656	0.00162495	na		-0.39369	0.085906	0.29235		-0.07175	0.84385	0.99322		0.19786	0.58372	0.93425
Serine/threonine-protein phosphatase PP1-gamma catalytic subunit	Serine/threonine-protein phosphatase PP1-gamma catalytic subunit	PPP1CC	PR	0.440154	0.013635	0.0261916	na		-0.33169	0.1531	0.31347		-0.092427	0.79954	0.99946		0.3651	0.29956	0.87144
Protein phosphatase 1 regulatory subunit 1B	Protein phosphatase 1 regulatory subunit 1B	PPP1R1B	PR	0.292649	0.000182672	0.00187244	na		-0.38286	0.095682	0.30625		-0.026474	0.94213	0.99479		0.16842	0.64186	0.93425
Serine/threonine-protein phosphatase 2A 65 kDa regulatory subunit A alpha isoform	Serine/threonine-protein phosphatase 2A 65 kDa regulatory subunit A alpha isoform	PPP2R1A	PR	0.610136	0.0113297	0.0214389	na		-0.10844	0.64905	0.73364		0.43448	0.20958	0.99946		-0.057088	0.87553	0.97634
Serine/threonine-protein phosphatase 2A 55 kDa regulatory subunit B alpha isoform	Serine/threonine-protein phosphatase 2A 55 kDa regulatory subunit B alpha isoform	PPP2R2A	PR	0.476426	0.00239274	0.00653907	na		-0.39429	0.085385	0.27796		-0.091609	0.80128	0.99861		-0.029401	0.93574	0.9975
Serine/threonine-protein phosphatase 6 catalytic subunit	Serine/threonine-protein phosphatase 6 catalytic subunit	PPP6C	PR	0.270565	0.000402437	0.00167762	na		-0.27571	0.23935	0.46097		0.00012697	0.99972	0.99998		0.3064	0.38922	0.93425
Serine/threonine-protein phosphatase 6 regulatory subunit 3	Serine/threonine-protein phosphatase 6 regulatory subunit 3	PPP6R3	PR	0.181185	0.00452543	0.0104738	na		-0.10177	0.66943	0.80952		0.35295	0.31712	0.99322		0.31782	0.37084	0.93425
Palmitoyl-protein thioesterase 1	Palmitoyl-protein thioesterase 1	PPT1	PR	0.183787	3.40333e-06	0.000170732	na		-0.23408	0.32054	0.47316		0.5233	0.12061	0.99861		0.09858	0.78644	0.96153
Peroxiredoxin-1	Peroxiredoxin-1	PRDX1	PR	0.557295	0.000793627	0.00273913	na		-0.36143	0.11741	0.28633		0.056667	0.87644	0.99946		0.014864	0.96749	0.99428
Thioredoxin-dependent peroxide reductase, mitochondrial	Thioredoxin-dependent peroxide reductase, mitochondrial	PRDX3	PR	0.452099	2.79116e-05	0.000373612	na		-0.37976	0.098628	0.2731		0.18524	0.60842	0.99946		-0.034513	0.92459	0.98986
Peroxiredoxin-6	Peroxiredoxin-6	PRDX6	PR	0.726614	0.000303881	0.00140753	na		-0.23889	0.31041	0.44199		0.48461	0.15576	0.99946		-0.21306	0.55453	0.91189
5'-AMP-activated protein kinase catalytic subunit alpha-1	5'-AMP-activated protein kinase catalytic subunit alpha-1	PRKAA1	PR	0.178269	0.000729982	0.0025782	0.08		-0.34236	0.13952	0.35153		0.057206	0.87527	0.99322		0.086418	0.81237	0.94009
5'-AMP-activated protein kinase subunit gamma-1	5'-AMP-activated protein kinase subunit gamma-1	PRKAG1	PR	0.289395	0.017799	0.0328352	na		-0.37713	0.10118	0.31679		-0.13048	0.71937	0.99322		0.1754	0.62791	0.93425
Glucosidase 2 subunit beta	Glucosidase 2 subunit beta	PRKCSH	PR	0.592913	0.00506048	0.0118447	na		-0.43033	0.058229	0.26544		-0.17466	0.62938	0.99946		-0.014702	0.96785	0.99428
DNA-dependent protein kinase catalytic subunit	DNA-dependent protein kinase catalytic subunit	PRKDC	PR	0.247745	0.000224846	0.0011608	na		-0.36268	0.11605	0.28576		0.11236	0.75729	0.99946		0.48504	0.15533	0.87144
Interferon-inducible double-stranded RNA-dependent protein kinase activator A	Interferon-inducible double-stranded RNA-dependent protein kinase activator A	PRKRA	PR	0.282919	0.00196316	0.00562369	na		-0.198	0.4027	0.59113		0.25816	0.47143	0.99322		0.56983	0.085485	0.93425
Protein arginine N-methyltransferase 1	Protein arginine N-methyltransferase 1	PRMT1	PR	0.347962	0.000784083	0.00271705	na		-0.35918	0.11987	0.30626		0.034343	0.92496	0.99861		0.18503	0.60882	0.92778
Protein arginine N-methyltransferase 5	Protein arginine N-methyltransferase 5	PRMT5	PR	0.256189	3.453e-05	0.000395493	na		-0.097036	0.68402	0.81798		0.4997	0.14139	0.99322		0.097621	0.78848	0.93425
U4/U6 small nuclear ribonucleoprotein Prp31	U4/U6 small nuclear ribonucleoprotein Prp31	PRPF31	PR	0.309156	0.013021	0.0252002	na		-0.26599	0.25699	0.46404		0.06811	0.8517	0.99322		0.035283	0.92291	0.96906
U4/U6 small nuclear ribonucleoprotein Prp4	U4/U6 small nuclear ribonucleoprotein Prp4	PRPF4	PR	0.000487848	0.000784306	0.00287476	0.46		-0.33341	0.15086	0.37111		0.21882	0.5436	0.99322		0.21917	0.54293	0.93425
Pre-mRNA-processing factor 6	Pre-mRNA-processing factor 6	PRPF6	PR	0.248543	0.00711723	0.01553	na		-0.29136	0.21264	0.43487		0.06044	0.86827	0.99322		0.17135	0.63598	0.93425
Pre-mRNA-processing-splicing factor 8	Pre-mRNA-processing-splicing factor 8	PRPF8	PR	0.358369	0.000572149	0.00214498	na		-0.39942	0.081033	0.26544		-0.1695	0.6397	0.99946		0.42152	0.22503	0.87144
Phosphoserine aminotransferase	Phosphoserine aminotransferase	PSAT1	PR	0.321164	0.00728456	0.0149711	na		-0.21849	0.35472	0.50697		0.10713	0.76832	0.99861		0.51722	0.12577	0.90718
Proteasome subunit alpha type-2	Proteasome subunit alpha type-2	PSMA2	PR	0.502135	0.000933023	0.0030876	na		-0.29249	0.21078	0.36114		0.15895	0.66096	0.99946		0.40093	0.25086	0.87144
Proteasome subunit alpha type-3	Proteasome subunit alpha type-3	PSMA3	PR	0.534053	0.000133612	0.000836722	na		-0.27835	0.2347	0.37955		0.15015	0.67885	0.99946		0.54674	0.10196	0.87144
Proteasome subunit alpha type-4	Proteasome subunit alpha type-4	PSMA4	PR	0.436826	0.000121969	0.000800565	na		-0.3821	0.0964	0.27069		0.038502	0.9159	0.99946		0.13077	0.71878	0.95237
Proteasome subunit alpha type-5	Proteasome subunit alpha type-5	PSMA5	PR	0.374938	1.55896e-06	0.000140326	0.12		-0.42546	0.061458	0.26544		0.048257	0.89468	0.99946		0.35505	0.31406	0.87144
Proteasome subunit alpha type-6	Proteasome subunit alpha type-6	PSMA6	PR	0.350082	3.08596e-05	0.000375043	na		-0.39522	0.084583	0.26544		-0.023363	0.94892	0.99946		0.54043	0.10678	0.87144
Proteasome subunit alpha type-7	Proteasome subunit alpha type-7	PSMA7	PR	0.378076	0.000101758	0.000714094	na		-0.39851	0.081795	0.26544		-0.030827	0.93263	0.99946		0.53643	0.10992	0.87144
Proteasome subunit beta type-1	Proteasome subunit beta type-1	PSMB1	PR	0.327928	1.5114e-05	0.000289132	na		-0.41785	0.066765	0.26544		-0.041313	0.90978	0.99946		0.4188	0.22835	0.87144
Proteasome subunit beta type-10	Proteasome subunit beta type-10	PSMB10	PR	0.292957	0.00170625	0.00484797	na		-0.23722	0.31391	0.46825		0.12387	0.73316	0.99861		0.45583	0.1855	0.90718
Proteasome subunit beta type-2	Proteasome subunit beta type-2	PSMB2	PR	0.347505	6.58817e-05	0.000559294	na		-0.30283	0.19434	0.36332		0.045829	0.89996	0.99861		0.52655	0.1179	0.90718
Proteasome subunit beta type-5	Proteasome subunit beta type-5	PSMB5	PR	0.550074	0.0129154	0.0250506	na		-0.35933	0.11971	0.33573		-0.19184	0.59546	0.99322		0.44792	0.19423	0.93425
Proteasome subunit beta type-8	Proteasome subunit beta type-8	PSMB8	PR	0.363271	0.000131853	0.000830434	na		-0.38716	0.091709	0.27968		0.031399	0.93138	0.99861		0.16207	0.65464	0.94285
Proteasome subunit beta type-9	Proteasome subunit beta type-9	PSMB9	PR	0.502312	0.00781665	0.016768	na		-0.40783	0.074262	0.27764		-0.21432	0.55211	0.99861		0.33102	0.35015	0.90718
26S proteasome regulatory subunit 4	26S proteasome regulatory subunit 4	PSMC1	PR	0.412624	0.000392928	0.00165278	na		-0.37173	0.10657	0.29401		-0.034606	0.92439	0.99861		0.50564	0.13597	0.90718
26S proteasome regulatory subunit 7	26S proteasome regulatory subunit 7	PSMC2	PR	0.393369	0.000369651	0.00159278	na		-0.32717	0.15912	0.31955		0.095763	0.79243	0.99946		0.10185	0.77949	0.95976
26S proteasome regulatory subunit 6A	26S proteasome regulatory subunit 6A	PSMC3	PR	0.267801	0.000160742	0.000945163	na		-0.3854	0.093325	0.26751		0.007089	0.98449	0.99946		0.45193	0.18978	0.87144
26S proteasome regulatory subunit 8	26S proteasome regulatory subunit 8	PSMC5	PR	0.366802	0.000879541	0.00295615	na		-0.37007	0.10826	0.27904		-0.024651	0.94611	0.99946		0.43163	0.21292	0.87144
26S proteasome regulatory subunit 10B	26S proteasome regulatory subunit 10B	PSMC6	PR	0.467433	0.000136149	0.000846915	na		-0.36843	0.10995	0.28061		-0.021043	0.95399	0.99946		0.38109	0.27726	0.87144
26S proteasome non-ATPase regulatory subunit 10	26S proteasome non-ATPase regulatory subunit 10	PSMD10	PR	0.415991	7.8609e-06	0.000228703	na		-0.31928	0.17002	0.34115		0.20721	0.56569	0.99861		0.032947	0.92801	0.9975
26S proteasome non-ATPase regulatory subunit 11	26S proteasome non-ATPase regulatory subunit 11	PSMD11	PR	0.450649	0.000115531	0.000771954	na		-0.39856	0.081753	0.27796		-0.042055	0.90817	0.99861		0.36123	0.30509	0.90718
26S proteasome non-ATPase regulatory subunit 13	26S proteasome non-ATPase regulatory subunit 13	PSMD13	PR	0.35201	0.00105226	0.00338201	na		-0.36691	0.11154	0.28199		0.006702	0.98534	0.99946		0.44165	0.20131	0.87144
26S proteasome non-ATPase regulatory subunit 14	26S proteasome non-ATPase regulatory subunit 14	PSMD14	PR	0.364329	0.00716246	0.0156043	na		-0.43164	0.057383	0.26232		-0.25122	0.48385	0.99861		0.34198	0.33344	0.90718
26S proteasome non-ATPase regulatory subunit 2	26S proteasome non-ATPase regulatory subunit 2	PSMD2	PR	0.486628	0.00069089	0.00247392	na		-0.34476	0.13659	0.3009		-0.021423	0.95316	0.99946		0.46618	0.17444	0.87144
26S proteasome non-ATPase regulatory subunit 5	26S proteasome non-ATPase regulatory subunit 5	PSMD5	PR	0.567439	0.0173487	0.0322671	na		-0.29851	0.20111	0.36555		-0.1168	0.74796	0.99861		0.12816	0.7242	0.95684
Proteasome activator complex subunit 1	Proteasome activator complex subunit 1	PSME1	PR	0.426534	3.74016e-05	0.000415069	na		-0.36169	0.11712	0.28633		0.090951	0.80268	0.99946		0.16175	0.65527	0.93148
Proteasome activator complex subunit 2	Proteasome activator complex subunit 2	PSME2	PR	0.42258	0.000333647	0.00148624	na		-0.38883	0.090199	0.26742		-0.018432	0.95969	0.99946		0.26352	0.46195	0.90225
Proteasome inhibitor PI31 subunit	Proteasome inhibitor PI31 subunit	PSMF1	PR	0.400815	0.00728456	0.0149711	na		-0.16285	0.49273	0.6659		0.34719	0.32564	0.99322		0.37732	0.28242	0.93425
Polypyrimidine tract-binding protein 1	Polypyrimidine tract-binding protein 1	PTBP1	PR	0.252304	8.8111e-06	0.000234217	na		-0.3765	0.1018	0.27676		0.1093	0.76374	0.99946		0.47475	0.1656	0.87144
Pentatricopeptide repeat domain-containing protein 3, mitochondrial	Pentatricopeptide repeat domain-containing protein 3, mitochondrial	PTCD3	PR	0.0012525	0.000273846	0.00187244	na		-0.38669	0.092139	0.30279		0.083313	0.81901	0.99322		0.38876	0.26688	0.93425
Phosphotriesterase-related protein	Phosphotriesterase-related protein	PTER	PR	0.126473	0.000615742	0.00227784	na		-0.36125	0.1176	0.33573		0.060536	0.86806	0.99322		0.61001	0.061108	0.93425
Prostaglandin F2 receptor negative regulator	Prostaglandin F2 receptor negative regulator	PTGFRN	PR	0.327395	0.000521304	0.00200275	na		-0.36234	0.11642	0.30572		0.35754	0.31043	0.99861		-0.31948	0.36821	0.90718
Prothymosin alpha	Prothymosin alpha	PTMA	PR	0.365537	0.000290089	0.00135715	na		-0.25845	0.27124	0.41384		0.31047	0.38261	0.99946		0.49664	0.14424	0.87144
Serine/threonine-protein phosphatase 2A activator	Serine/threonine-protein phosphatase 2A activator	PTPA	PR	0.62893	0.00845575	0.0178375	na		-0.19156	0.41849	0.56619		0.11081	0.76055	0.99861		0.52199	0.12171	0.90718
Tyrosine-protein phosphatase non-receptor type 6	Tyrosine-protein phosphatase non-receptor type 6	PTPN6	PR	0.508988	0.0215194	0.0382339	na		-0.38899	0.090056	0.27827		-0.23296	0.51717	0.99861		0.20532	0.56931	0.91234
Poly(U)-binding-splicing factor PUF60	Poly(U)-binding-splicing factor PUF60	PUF60	PR	0.194837	0.000388603	0.00164699	na		-0.31714	0.17306	0.345		0.12787	0.72481	0.99861		0.45952	0.18152	0.90718
Pumilio homolog 3	Pumilio homolog 3	PUM3	PR	0.00120673	0.000207487	0.00187244	na		-0.39877	0.081579	0.28476		-0.004593	0.98995	0.99913		0.43999	0.2032	0.93425
Paxillin	Paxillin	PXN	PR	0.439343	0.00250491	0.00674057	na		-0.16026	0.4997	0.67121		0.45323	0.18834	0.99322		0.30157	0.39711	0.93425
Apoptosis-associated speck-like protein containing a CARD	Apoptosis-associated speck-like protein containing a CARD	PYCARD	PR	0.32733	0.000511199	0.00197753	na		-0.39	0.089148	0.26742		-0.080347	0.82537	0.99946		0.24344	0.49792	0.90225
Dihydropteridine reductase	Dihydropteridine reductase	QDPR	PR	0.569928	0.00579536	0.0125088	na		-0.20697	0.38127	0.53229		0.23373	0.51574	0.99861		-0.52077	0.12274	0.90718
Ras-related protein Rab-10	Ras-related protein Rab-10	RAB10	PR	0.55746	0.00446869	0.0106767	na		-0.27355	0.2432	0.38944		0.030661	0.93299	0.99946		0.38	0.27874	0.87144
Ras-related protein Rab-11B	Ras-related protein Rab-11B	RAB11B	PR	0.514334	6.00362e-05	0.000540983	0.02		-0.39008	0.089079	0.26742		0.033375	0.92707	0.99946		0.26224	0.46421	0.90225
Ras-related protein Rab-1A	Ras-related protein Rab-1A	RAB1A	PR	0.542258	0.000317723	0.00144421	na		-0.34547	0.13572	0.3009		0.0061704	0.9865	0.99946		0.29527	0.40753	0.90222
Ras-related protein Rab-25	Ras-related protein Rab-25	RAB25	PR	0.000763394	0.000207487	0.00187244	0.06		-0.26549	0.25792	0.46404		0.47631	0.16402	0.99322		0.49482	0.14595	0.93425
Ras-related protein Rab-5B	Ras-related protein Rab-5B	RAB5B	PR	0.552576	3.59793e-06	0.000170732	na		-0.43922	0.052675	0.26544		0.022061	0.95177	0.99946		-0.083119	0.81943	0.96763
Ras-related protein Rab-5C	Ras-related protein Rab-5C	RAB5C	PR	0.579842	0.000165054	0.000954443	na		-0.42238	0.063563	0.26544		-0.088959	0.80693	0.99946		0.10745	0.76764	0.95882
Ras-related protein Rab-6A	Ras-related protein Rab-6A	RAB6A	PR	0.486547	0.00247689	0.00667755	na		-0.3939	0.085716	0.26583		-0.16456	0.64962	0.99946		0.39827	0.25432	0.87144
Ras-related C3 botulinum toxin substrate 1	Ras-related C3 botulinum toxin substrate 1	RAC1	PR	0.673262	0.000904514	0.0030219	na		-0.076401	0.74886	0.80558		0.56514	0.088686	0.99946		0.34715	0.32569	0.87144
Receptor of activated protein C kinase 1	Receptor of activated protein C kinase 1	RACK1	PR	0.417244	0.000184254	0.00101704	na		-0.40722	0.074741	0.26544		-0.062147	0.86458	0.99946		0.2966	0.40531	0.90222
UV excision repair protein RAD23 homolog B	UV excision repair protein RAD23 homolog B	RAD23B	PR	0.733276	0.021348	0.0380261	na		-0.20655	0.38227	0.4995		0.030896	0.93248	0.99946		0.28084	0.43187	0.90222
DNA repair protein RAD50	DNA repair protein RAD50	RAD50	PR	0.195527	9.73795e-06	0.000234375	na		-0.34658	0.13439	0.31859		-0.035337	0.9228	0.99861		0.16425	0.65024	0.94285
mRNA export factor	mRNA export factor	RAE1	PR	0.391593	0.0238182	0.0416558	na		-0.26036	0.26759	0.47239		-0.2272	0.52788	0.99322		0.032791	0.92835	0.96968
Ras-related protein Ral-A	Ras-related protein Ral-A	RALA	PR	0.309595	2.00933e-06	0.00015809	0.82		-0.35675	0.12259	0.30696		0.25874	0.4704	0.99861		0.41304	0.23548	0.90718
RNA-binding protein Raly	RNA-binding protein Raly	RALY	PR	0.283804	0.00101334	0.00329483	na		-0.33952	0.14305	0.3084		0.044984	0.9018	0.99946		0.46783	0.17272	0.87144
GTP-binding nuclear protein Ran	GTP-binding nuclear protein Ran	RAN	PR	0.413335	0.000109449	0.000751085	na		-0.38612	0.092661	0.26751		-0.023578	0.94845	0.99946		0.52237	0.12139	0.87144
E3 SUMO-protein ligase RanBP2	E3 SUMO-protein ligase RanBP2	RANBP2	PR	0.506695	0.00364286	0.00902796	na		-0.22597	0.33807	0.49121		0.31283	0.37881	0.99861		0.1506	0.67792	0.94918
Ran-binding protein 3	Ran-binding protein 3	RANBP3	PR	0.404727	0.000406922	0.00168804	0.02		-0.35375	0.12599	0.34427		0.01268	0.97227	0.99591		0.019331	0.95773	0.97512
Ran GTPase-activating protein 1	Ran GTPase-activating protein 1	RANGAP1	PR	0.384867	0.00156416	0.00464757	na		-0.34503	0.13625	0.319		-0.039643	0.91342	0.99861		0.16092	0.65697	0.94285
Ras-related protein Rap-2c	Ras-related protein Rap-2c	RAP2C	PR	0.218694	4.64019e-06	0.000180129	0.08		-0.39968	0.080819	0.28476		-0.045262	0.90119	0.99322		0.28333	0.42762	0.93425
Histone-binding protein RBBP4	Histone-binding protein RBBP4	RBBP4	PR	0.383855	0.00284255	0.0074828	na		-0.20001	0.39785	0.51574		0.22859	0.52527	0.99946		0.23255	0.51793	0.90813
Histone-binding protein RBBP7	Histone-binding protein RBBP7	RBBP7	PR	0.472678	0.000120993	0.0007989	na		-0.35921	0.11985	0.28919		-0.077651	0.83116	0.99946		0.039091	0.91462	0.98451
RNA-binding protein 14	RNA-binding protein 14	RBM14	PR	0.346589	9.30822e-05	0.000687138	na		-0.40532	0.076242	0.27764		-0.12668	0.72729	0.99861		0.57888	0.079528	0.90718
RNA-binding protein 25	RNA-binding protein 25	RBM25	PR	0.205824	0.000194372	0.00105542	na		-0.19989	0.39814	0.589		0.28783	0.42	0.99322		0.47859	0.16172	0.93425
RNA-binding protein 3	RNA-binding protein 3	RBM3	PR	0.48745	0.00419951	0.0101376	na		-0.18633	0.43154	0.57476		0.13037	0.71961	0.99861		0.22173	0.53811	0.90718
RNA-binding protein 4	RNA-binding protein 4	RBM4	PR	0.190138	0.0122865	0.0254527	na		-0.2133	0.36656	0.5656		0.049126	0.8928	0.99322		-0.03243	0.92913	0.96968
Regulator of chromosome condensation	Regulator of chromosome condensation	RCC1	PR	0.243158	2.9687e-05	0.000374453	na		-0.20288	0.39097	0.54094		0.34896	0.32302	0.99861		0.43381	0.21036	0.90718
Retinol dehydrogenase 11	Retinol dehydrogenase 11	RDH11	PR	0.398796	0.0158394	0.0298714	na		-0.32179	0.1665	0.3868		-0.028604	0.93748	0.99479		0.069469	0.84877	0.9493
Retinol dehydrogenase 13	Retinol dehydrogenase 13	RDH13	PR	0.280761	0.0209404	0.0359264	na		-0.16577	0.48488	0.66162		0.20811	0.56396	0.99322		-0.12996	0.72047	0.93425
ATP-dependent DNA helicase Q1	ATP-dependent DNA helicase Q1	RECQL	PR	0.515325	0.00870189	0.0182465	na		-0.41512	0.068747	0.27469		-0.16674	0.64524	0.99861		-0.0036546	0.99201	0.9975
Transforming protein RhoA	Transforming protein RhoA	RHOA	PR	0.624143	0.000137734	0.000854871	na		-0.37039	0.10793	0.27904		-0.0106	0.97682	0.99946		0.28624	0.42268	0.90222
Rho-related GTP-binding protein RhoC	Rho-related GTP-binding protein RhoC	RHOC	PR	0.396511	0.0177725	0.032808	na		-0.29216	0.21132	0.36142		-0.18506	0.60877	0.99946		0.41879	0.22836	0.87144
2-iminobutanoate/2-iminopropanoate deaminase	2-iminobutanoate/2-iminopropanoate deaminase	RIDA	PR	0.000437986	0.000243759	0.00187244	na		-0.31886	0.17061	0.38861		0.32304	0.3626	0.99322		0.33648	0.34178	0.93425
Ribonuclease T2	Ribonuclease T2	RNASET2	PR	0.280697	6.70227e-05	0.000565542	na		-0.41377	0.069742	0.27587		-0.051766	0.88706	0.99861		0.3384	0.33886	0.90718
Aminopeptidase B	Aminopeptidase B	RNPEP	PR	0.459116	1.80836e-05	0.00029469	na		-0.33676	0.14654	0.31087		0.20544	0.5691	0.99946		-0.075303	0.83621	0.97242
RNA-binding protein with serine-rich domain 1	RNA-binding protein with serine-rich domain 1	RNPS1	PR	0.0984394	0.00065393	0.00237507	na		-0.22338	0.3438	0.54215		0.42247	0.22388	0.99322		0.50883	0.13311	0.93425
60 kDa SS-A/Ro ribonucleoprotein	60 kDa SS-A/Ro ribonucleoprotein	RO60	PR	0.46548	5.56954e-05	0.000523762	na		-0.37366	0.10462	0.29363		-0.03876	0.91534	0.99861		0.21998	0.54142	0.90718
Rho-associated protein kinase 1	Rho-associated protein kinase 1	ROCK1	PR	0.328638	0.0125032	0.0244426	na		-0.35956	0.11945	0.33573		-0.19786	0.58374	0.99322		-0.23565	0.51221	0.93425
Rho-associated protein kinase 2	Rho-associated protein kinase 2	ROCK2	PR	0.190758	0.000181651	0.00187244	na		-0.16759	0.48004	0.65822		0.21482	0.55117	0.99322		0.49322	0.14746	0.93425
Replication protein A 70 kDa DNA-binding subunit	Replication protein A 70 kDa DNA-binding subunit	RPA1	PR	0.434222	0.0091085	0.0179029	0.06		-0.18183	0.44294	0.58102		0.22916	0.52423	0.99861		-0.13217	0.71587	0.95684
60S ribosomal protein L10a	60S ribosomal protein L10a	RPL10A	PR	0.421931	0.00142263	0.00512697	na		-0.38639	0.092412	0.26751		-0.12042	0.74037	0.99946		0.4001	0.25194	0.87144
60S ribosomal protein L11	60S ribosomal protein L11	RPL11	PR	0.418444	0.000392302	0.00165264	na		-0.40091	0.079804	0.27796		-0.10836	0.76572	0.99861		0.44316	0.19959	0.90718
60S ribosomal protein L13	60S ribosomal protein L13	RPL13	PR	0.301536	0.000399226	0.00166922	na		-0.39333	0.086215	0.26653		-0.043255	0.90556	0.99946		0.29194	0.41308	0.90222
60S ribosomal protein L14	60S ribosomal protein L14	RPL14	PR	0.297105	5.65393e-06	0.000189158	na		-0.37843	0.099916	0.27428		0.077505	0.83147	0.99946		0.5068	0.13492	0.87144
60S ribosomal protein L15	60S ribosomal protein L15	RPL15	PR	0.421733	0.00131523	0.00404988	na		-0.31911	0.17025	0.32908		-0.027315	0.94029	0.99946		0.39424	0.2596	0.87144
60S ribosomal protein L18a	60S ribosomal protein L18a	RPL18A	PR	0.372137	0.000593068	0.00221027	na		-0.31194	0.1806	0.33583		0.090355	0.80395	0.99946		0.25006	0.48593	0.90225
60S ribosomal protein L19	60S ribosomal protein L19	RPL19	PR	0.556015	0.0214225	0.0381103	na		-0.3004	0.19812	0.36332		-0.20833	0.56354	0.99861		0.31669	0.37263	0.90718
60S ribosomal protein L22	60S ribosomal protein L22	RPL22	PR	0.355619	0.000156684	0.000928305	na		-0.39827	0.081995	0.27796		-0.064364	0.85979	0.99861		0.45916	0.1819	0.90718
60S ribosomal protein L23	60S ribosomal protein L23	RPL23	PR	0.289163	9.63943e-06	0.000234217	na		-0.42351	0.062781	0.26544		-0.026984	0.94102	0.99946		0.42989	0.21498	0.87144
60S ribosomal protein L23a	60S ribosomal protein L23a	RPL23A	PR	0.502927	0.00876778	0.0183709	na		-0.23501	0.31859	0.44859		0.069764	0.84813	0.99946		0.55324	0.097135	0.87144
60S ribosomal protein L24	60S ribosomal protein L24	RPL24	PR	0.334955	0.00205798	0.00582365	na		-0.30202	0.1956	0.36332		0.027216	0.94051	0.99861		0.42438	0.22157	0.90718
60S ribosomal protein L26	60S ribosomal protein L26	RPL26	PR	0.472603	0.00290827	0.00760503	na		-0.41647	0.067757	0.27407		-0.19383	0.59157	0.99861		0.1294	0.72162	0.95684
60S ribosomal protein L27	60S ribosomal protein L27	RPL27	PR	0.376833	0.000209046	0.00110581	na		-0.42947	0.05879	0.26544		-0.12118	0.73878	0.99946		0.32107	0.3657	0.88984
60S ribosomal protein L27a	60S ribosomal protein L27a	RPL27A	PR	0.427524	0.0110077	0.0219134	na		-0.34882	0.13172	0.31679		-0.062653	0.86348	0.99861		0.089289	0.80623	0.96166
60S ribosomal protein L28	60S ribosomal protein L28	RPL28	PR	0.393771	0.00106934	0.00340673	na		-0.32579	0.16099	0.32132		0.0081627	0.98215	0.99946		0.43161	0.21295	0.87144
60S ribosomal protein L3	60S ribosomal protein L3	RPL3	PR	0.395981	0.000381157	0.00162495	na		-0.36595	0.11256	0.28231		0.0040549	0.99113	0.99946		0.3202	0.36707	0.88984
60S ribosomal protein L30	60S ribosomal protein L30	RPL30	PR	0.42705	7.28252e-05	0.000582226	na		-0.42998	0.058455	0.26544		-0.11645	0.7487	0.99946		0.43365	0.21055	0.87144
60S ribosomal protein L31	60S ribosomal protein L31	RPL31	PR	0.328128	0.00082308	0.00280692	na		-0.19535	0.40915	0.55814		0.26645	0.45679	0.99861		0.39517	0.25838	0.90718
60S ribosomal protein L32	60S ribosomal protein L32	RPL32	PR	0.355313	0.00215456	0.00602975	na		-0.32228	0.16581	0.33987		0.10631	0.77005	0.99861		0.024561	0.94631	0.9975
60S ribosomal protein L34	60S ribosomal protein L34	RPL34	PR	0.42301	0.00163336	0.00481849	0.02		-0.31934	0.16993	0.34115		0.0093653	0.97952	0.99861		0.46301	0.17779	0.90718
60S ribosomal protein L35	60S ribosomal protein L35	RPL35	PR	0.380113	0.00762042	0.0163974	na		-0.10024	0.67415	0.81357		0.3162	0.37341	0.99322		0.25829	0.4712	0.93425
60S ribosomal protein L36a-like	60S ribosomal protein L36a-like	RPL36AL	PR	0.298275	0.000218276	0.0011374	na		-0.40626	0.075494	0.27764		-0.14644	0.68645	0.99861		0.36981	0.29289	0.90718
60S ribosomal protein L37a	60S ribosomal protein L37a	RPL37A	PR	0.47936	0.024934	0.043471	0.04		-0.22471	0.34086	0.49448		0.040459	0.91164	0.99861		0.30614	0.38963	0.90718
60S ribosomal protein L38	60S ribosomal protein L38	RPL38	PR	0.39301	0.00151817	0.00453018	na		-0.21382	0.36537	0.48256		0.14544	0.6885	0.99946		0.45109	0.1907	0.87144
60S ribosomal protein L4	60S ribosomal protein L4	RPL4	PR	0.478754	0.002184	0.0060756	na		-0.32282	0.16506	0.32547		-0.0651	0.8582	0.99946		0.47653	0.1638	0.87144
60S ribosomal protein L5	60S ribosomal protein L5	RPL5	PR	0.427972	0.000305756	0.00141011	na		-0.37083	0.10748	0.27904		-0.023181	0.94932	0.99946		0.38833	0.26746	0.87144
60S ribosomal protein L6	60S ribosomal protein L6	RPL6	PR	0.445529	0.00279798	0.00738636	na		-0.32732	0.15892	0.31955		-0.012879	0.97183	0.99946		0.18501	0.60886	0.91645
60S ribosomal protein L7	60S ribosomal protein L7	RPL7	PR	0.315846	0.000540545	0.00205968	na		-0.3994	0.08105	0.26544		-0.099699	0.78406	0.99946		0.37307	0.28832	0.87144
60S ribosomal protein L7a	60S ribosomal protein L7a	RPL7A	PR	0.377202	0.00032198	0.00145281	na		-0.35368	0.12607	0.29592		-0.017474	0.96179	0.99946		0.41682	0.23079	0.87144
60S ribosomal protein L8	60S ribosomal protein L8	RPL8	PR	0.465388	0.00181184	0.005244	na		-0.35632	0.12307	0.30696		-0.070778	0.84595	0.99861		0.34443	0.32976	0.90718
60S ribosomal protein L9	60S ribosomal protein L9	RPL9	PR	0.413593	0.00138472	0.00504241	na		-0.16679	0.48217	0.59362		0.36444	0.3005	0.99946		0.48033	0.15998	0.87144
60S acidic ribosomal protein P0	60S acidic ribosomal protein P0	RPLP0	PR	0.339416	0.000274766	0.00131569	na		-0.41922	0.065779	0.26544		-0.054925	0.88021	0.99946		0.10984	0.7626	0.95878
60S acidic ribosomal protein P2	60S acidic ribosomal protein P2	RPLP2	PR	0.450204	0.000124468	0.000808464	na		-0.41289	0.070401	0.26544		-0.11338	0.75514	0.99946		0.58027	0.078635	0.87144
Dolichyl-diphosphooligosaccharide--protein glycosyltransferase subunit 1	Dolichyl-diphosphooligosaccharide--protein glycosyltransferase subunit 1	RPN1	PR	0.567376	0.00355868	0.00885076	na		-0.38876	0.090263	0.26742		-0.14053	0.6986	0.99946		0.36126	0.30505	0.87144
Dolichyl-diphosphooligosaccharide--protein glycosyltransferase subunit 2	Dolichyl-diphosphooligosaccharide--protein glycosyltransferase subunit 2	RPN2	PR	0.601587	0.0194999	0.0354809	na		-0.37927	0.099103	0.27358		-0.1684	0.64189	0.99946		0.22309	0.53555	0.91189
40S ribosomal protein S11	40S ribosomal protein S11	RPS11	PR	0.456802	0.000597002	0.00222028	na		-0.26116	0.26606	0.40941		0.12558	0.72958	0.99946		0.3564	0.31209	0.87144
40S ribosomal protein S12	40S ribosomal protein S12	RPS12	PR	0.38384	0.000124206	0.000808464	na		-0.43132	0.057593	0.26544		-0.11896	0.74343	0.99946		0.39184	0.26277	0.87144
40S ribosomal protein S13	40S ribosomal protein S13	RPS13	PR	0.408402	0.000286116	0.00134759	na		-0.37276	0.10552	0.27904		-0.0036928	0.99192	0.99946		0.27161	0.44778	0.90222
40S ribosomal protein S14	40S ribosomal protein S14	RPS14	PR	0.377286	3.56772e-05	0.000403427	na		-0.38908	0.08997	0.26742		0.02179	0.95236	0.99946		0.18361	0.61163	0.91645
40S ribosomal protein S15a	40S ribosomal protein S15a	RPS15A	PR	0.4346	0.000453251	0.0018273	na		-0.28049	0.23098	0.37726		0.19872	0.58207	0.99946		0.40495	0.2457	0.87144
40S ribosomal protein S16	40S ribosomal protein S16	RPS16	PR	0.374252	0.000234243	0.00183775	na		-0.38003	0.098373	0.2731		0.0043388	0.99051	0.99946		0.46948	0.17101	0.87144
40S ribosomal protein S17	40S ribosomal protein S17	RPS17	PR	0.22502	0.00022218	0.00115129	na		-0.41981	0.06536	0.26544		-0.12449	0.73185	0.99946		0.44637	0.19596	0.87144
40S ribosomal protein S18	40S ribosomal protein S18	RPS18	PR	0.269918	0.000547484	0.00207761	na		-0.41596	0.068131	0.26544		-0.072872	0.84144	0.99946		0.32923	0.35293	0.88624
40S ribosomal protein S19	40S ribosomal protein S19	RPS19	PR	0.4625	0.000178761	0.000996564	na		-0.40706	0.074864	0.26544		-0.12714	0.72633	0.99946		0.47525	0.16509	0.87144
40S ribosomal protein S2	40S ribosomal protein S2	RPS2	PR	0.400529	0.000459035	0.00184472	na		-0.27837	0.23467	0.37955		0.19585	0.58764	0.99946		0.31153	0.38091	0.89588
40S ribosomal protein S20	40S ribosomal protein S20	RPS20	PR	0.384795	5.93394e-05	0.000540983	na		-0.41384	0.06969	0.26544		-0.066076	0.85609	0.99946		0.29984	0.39995	0.89588
40S ribosomal protein S23	40S ribosomal protein S23	RPS23	PR	0.410256	0.000698145	0.00249135	na		-0.17653	0.45656	0.5893		0.45687	0.18437	0.99861		0.5516	0.098338	0.90718
40S ribosomal protein S24	40S ribosomal protein S24	RPS24	PR	0.316953	0.000762429	0.00266516	na		-0.39138	0.087921	0.27796		-0.043198	0.90568	0.99861		0.25012	0.48582	0.90718
40S ribosomal protein S25	40S ribosomal protein S25	RPS25	PR	0.30915	0.000258706	0.00126989	na		-0.32907	0.15657	0.33442		0.20234	0.57505	0.99861		0.37686	0.28306	0.90718
40S ribosomal protein S26	40S ribosomal protein S26	RPS26	PR	0.364343	0.00161452	0.00478193	na		-0.11611	0.62592	0.7262		0.33692	0.34111	0.99861		0.16701	0.64468	0.94285
40S ribosomal protein S27	40S ribosomal protein S27	RPS27	PR	0.287154	6.01615e-05	0.000540983	na		-0.40468	0.076752	0.27793		-0.056968	0.87579	0.99861		0.52465	0.11948	0.90718
Ubiquitin-40S ribosomal protein S27a	Ubiquitin-40S ribosomal protein S27a	RPS27A	PR	0.587939	0.0265191	0.0456083	0.02		-0.21274	0.36785	0.48519		0.095038	0.79397	0.99946		0.22884	0.52482	0.90885
40S ribosomal protein S28	40S ribosomal protein S28	RPS28	PR	0.345815	9.53354e-05	0.000695227	na		-0.2581	0.2719	0.43032		0.16636	0.64599	0.99861		0.581	0.078171	0.90718
40S ribosomal protein S3	40S ribosomal protein S3	RPS3	PR	0.356952	0.000110088	0.000753617	na		-0.36177	0.11703	0.28633		0.040262	0.91207	0.99946		0.34267	0.3324	0.87144
40S ribosomal protein S4, X isoform	40S ribosomal protein S4, X isoform	RPS4X	PR	0.375896	0.000146564	0.000886047	na		-0.29181	0.2119	0.36178		0.16325	0.65225	0.99946		0.31374	0.37735	0.89588
40S ribosomal protein S5	40S ribosomal protein S5	RPS5	PR	0.429603	0.000654975	0.00237577	na		-0.32221	0.16591	0.32584		0.0095596	0.97909	0.99946		0.54696	0.10179	0.87144
40S ribosomal protein S6	40S ribosomal protein S6	RPS6	PR	0.389442	0.00173541	0.00506478	na		-0.32674	0.1597	0.31983		0.039371	0.91401	0.99946		0.20472	0.57048	0.91266
40S ribosomal protein S7	40S ribosomal protein S7	RPS7	PR	0.342584	0.000385944	0.0016407	na		-0.42433	0.062221	0.26544		-0.11842	0.74456	0.99946		0.30342	0.39407	0.89588
40S ribosomal protein S8	40S ribosomal protein S8	RPS8	PR	0.405051	0.000588823	0.00220158	na		-0.31334	0.17855	0.33456		0.079346	0.82752	0.99946		0.33857	0.3386	0.87144
40S ribosomal protein S9	40S ribosomal protein S9	RPS9	PR	0.422559	0.00147686	0.00445451	na		-0.42047	0.064901	0.26544		-0.16553	0.64765	0.99946		0.3512	0.3197	0.87144
40S ribosomal protein SA	40S ribosomal protein SA	RPSA	PR	0.392619	3.82876e-05	0.000419361	na		-0.36985	0.10848	0.27904		0.061263	0.86649	0.99946		0.43638	0.20738	0.87144
Ribonucleoside-diphosphate reductase large subunit	Ribonucleoside-diphosphate reductase large subunit	RRM1	PR	0.00346791	0.0109523	0.0214063	na		-0.29606	0.20501	0.42464		-0.062589	0.86362	0.99322		0.29523	0.40759	0.93425
Ribonucleoside-diphosphate reductase subunit M2	Ribonucleoside-diphosphate reductase subunit M2	RRM2	PR	0.128392	0.0201729	0.035369	na		-0.023538	0.92153	0.96482		0.4117	0.23716	0.99322		0.35003	0.32143	0.93425
RRP12-like protein	RRP12-like protein	RRP12	PR	0.0303214	0.00031307	0.00187244	na		-0.26726	0.25465	0.46404		0.30696	0.38829	0.99322		0.19762	0.5842	0.93425
U3 small nucleolar RNA-interacting protein 2	U3 small nucleolar RNA-interacting protein 2	RRP9	PR	0.176453	0.0072626	0.0149711	na		-0.049828	0.83475	0.92618		0.479	0.16131	0.99322		0.50344	0.13796	0.93425
Ribosomal L1 domain-containing protein 1	Ribosomal L1 domain-containing protein 1	RSL1D1	PR	0.0984391	0.00293134	0.00764449	na		-0.43027	0.05827	0.26232		-0.098464	0.78669	0.99861		0.30024	0.3993	0.90718
tRNA-splicing ligase RtcB homolog	tRNA-splicing ligase RtcB homolog	RTCB	PR	0.589678	0.00275429	0.00728477	na		-0.40206	0.078862	0.26544		-0.16747	0.64376	0.99946		0.060103	0.869	0.97575
RNA transcription, translation and transport factor protein	RNA transcription, translation and transport factor protein	RTRAF	PR	0.583313	0.00748216	0.0161372	na		-0.13933	0.55797	0.65818		0.31281	0.37884	0.99946		0.19908	0.58137	0.91645
RuvB-like 2	RuvB-like 2	RUVBL2	PR	0.451354	0.00151294	0.00452424	na		-0.22265	0.34541	0.50031		0.234	0.51524	0.99861		0.40998	0.23932	0.90718
Protein S100-A14	Protein S100-A14	S100A14	PR	0.354048	0.0186983	0.0341335	na		-0.21766	0.35661	0.5078		0.12465	0.73153	0.99861		-0.0082482	0.98196	0.9975
Protein S100-A16	Protein S100-A16	S100A16	PR	0.478007	0.00569102	0.0130074	na		-0.12	0.61432	0.71904		0.41622	0.23153	0.99861		-0.028861	0.93692	0.9975
Serum amyloid A-1 protein	Serum amyloid A-1 protein	SAA1	PR	0.116934	0.00579536	0.0125088	0.06		-0.41064	0.072104	0.27712		-0.2692	0.45198	0.99861		-0.010047	0.97802	0.9975
SUMO-activating enzyme subunit 1	SUMO-activating enzyme subunit 1	SAE1	PR	0.271183	0.00579536	0.0125088	na		-0.29458	0.2074	0.37043		0.038657	0.91556	0.99861		0.47179	0.16862	0.90718
Deoxynucleoside triphosphate triphosphohydrolase SAMHD1	Deoxynucleoside triphosphate triphosphohydrolase SAMHD1	SAMHD1	PR	0.624879	0.0147778	0.0281352	na		-0.14126	0.55248	0.6542		0.23659	0.51047	0.99946		0.099105	0.78532	0.96126
Sorting and assembly machinery component 50 homolog	Sorting and assembly machinery component 50 homolog	SAMM50	PR	0.331056	5.49366e-06	0.000189158	na		-0.39175	0.087598	0.27796		0.072439	0.84237	0.99861		0.23231	0.51837	0.90718
SAP domain-containing ribonucleoprotein	SAP domain-containing ribonucleoprotein	SARNP	PR	0.362836	0.00865201	0.0181692	na		-0.095093	0.69005	0.78431		0.39233	0.26212	0.99861		0.29196	0.41306	0.90718
Serine--tRNA ligase, cytoplasmic	Serine--tRNA ligase, cytoplasmic	SARS1	PR	0.399182	5.75442e-05	0.000536003	na		-0.41568	0.068339	0.26544		-0.083934	0.81768	0.99946		0.59109	0.071927	0.87144
Serine--tRNA ligase, mitochondrial	Serine--tRNA ligase, mitochondrial	SARS2	PR	0.00128203	0.000380107	0.00214907	0.1		-0.25841	0.2713	0.47575		0.48732	0.15311	0.99322		0.099992	0.78344	0.93425
Squamous cell carcinoma antigen recognized by T-cells 3	Squamous cell carcinoma antigen recognized by T-cells 3	SART3	PR	0.221329	1.6091e-05	0.000294111	na		-0.35504	0.12452	0.30727		0.01931	0.95778	0.99861		0.52861	0.11621	0.90718
Ribosome maturation protein SBDS	Ribosome maturation protein SBDS	SBDS	PR	0.637448	0.00694379	0.0152349	na		-0.18525	0.43425	0.57672		0.29417	0.40936	0.99861		0.13579	0.70838	0.95684
Saccharopine dehydrogenase-like oxidoreductase	Saccharopine dehydrogenase-like oxidoreductase	SCCPDH	PR	0.124834	0.000768539	0.00282438	na		-0.24821	0.29135	0.49478		0.24959	0.48678	0.99322		0.31653	0.37289	0.93425
Non-specific lipid-transfer protein	Non-specific lipid-transfer protein	SCP2	PR	0.219457	1.05468e-06	0.000128075	na		-0.40725	0.074722	0.26544		-0.01117	0.97557	0.99946		0.14215	0.69526	0.94091
Protein scribble homolog	Protein scribble homolog	SCRIB	PR	0.0013886	0.000207487	0.00187244	na		-0.32023	0.16867	0.38727		0.45882	0.18227	0.99322		0.59656	0.068678	0.93425
Secernin-2	Secernin-2	SCRN2	PR	0.0015188	0.0109523	0.0214063	0.02		-0.09858	0.67925	0.81795		0.49541	0.14539	0.99322		0.26855	0.45312	0.93425
Syndecan-1	Syndecan-1	SDC1	PR	0.156772	0.0136609	0.0256088	na		-0.38206	0.096439	0.30753		-0.078038	0.83033	0.99322		-0.36099	0.30545	0.93425
Succinate dehydrogenase [ubiquinone] iron-sulfur subunit, mitochondrial	Succinate dehydrogenase [ubiquinone] iron-sulfur subunit, mitochondrial	SDHB	PR	0.516826	0.000363147	0.00157621	na		-0.3983	0.081968	0.27796		0.0013639	0.99702	0.99861		-0.38936	0.26608	0.90718
Protein transport protein Sec23B	Protein transport protein Sec23B	SEC23B	PR	0.335792	0.0113297	0.0214389	na		-0.33544	0.14823	0.31112		-0.10587	0.77099	0.99946		0.2795	0.43416	0.90222
Protein transport protein Sec24B	Protein transport protein Sec24B	SEC24B	PR	0.317199	0.00405074	0.00980391	na		-0.26501	0.25881	0.46404		-0.21883	0.54359	0.99322		0.32652	0.35715	0.93425
Protein transport protein Sec31A	Protein transport protein Sec31A	SEC31A	PR	0.525735	0.00678161	0.0149916	na		-0.31123	0.18165	0.33652		-0.022512	0.95078	0.99946		0.21897	0.54332	0.91189
Translocation protein SEC63 homolog	Translocation protein SEC63 homolog	SEC63	PR	0.194949	0.0136609	0.0256088	na		-0.0039422	0.98684	0.99252		0.44043	0.20269	0.99322		0.47047	0.16998	0.93425
Septin-10	Septin-10	SEPTIN10	PR	0.329187	0.00848564	0.0178736	na		-0.24586	0.29607	0.49984		0.046553	0.89839	0.99322		-0.19999	0.5796	0.93425
Septin-11	Septin-11	SEPTIN11	PR	0.609533	0.0135011	0.0259701	na		-0.34982	0.13055	0.29592		-0.12892	0.72262	0.99946		-0.061169	0.86669	0.97575
Septin-7	Septin-7	SEPTIN7	PR	0.624462	0.000130072	0.000829429	na		-0.24147	0.30507	0.44024		0.34357	0.33105	0.99946		0.23025	0.52219	0.90885
Plasminogen activator inhibitor 1 RNA-binding protein	Plasminogen activator inhibitor 1 RNA-binding protein	SERBP1	PR	0.21638	4.15431e-06	0.000173179	na		-0.40665	0.075191	0.26544		0.030753	0.93279	0.99946		0.55005	0.099488	0.87144
Leukocyte elastase inhibitor	Leukocyte elastase inhibitor	SERPINB1	PR	0.506898	0.00455383	0.0108254	na		-0.36103	0.11784	0.28633		-0.13857	0.70262	0.99946		0.22871	0.52506	0.90885
Serpin B4	Serpin B4	SERPINB4	PR	0.00182914	0.0212412	0.0360867	na		-0.1242	0.60188	0.71257		0.33034	0.3512	0.99861		0.37674	0.28323	0.90718
Serpin B5	Serpin B5	SERPINB5	PR	0.241547	0.00579536	0.0125088	0.02		-0.29408	0.20819	0.37043		0.011747	0.97431	0.99861		0.27758	0.43745	0.90718
Protein SET	Protein SET	SET	PR	0.289439	1.2054e-05	0.000260982	na		-0.3195	0.16971	0.32908		0.19345	0.59231	0.99946		0.18916	0.6007	0.91645
Splicing factor 1	Splicing factor 1	SF1	PR	0.582134	0.00699003	0.0153003	na		-0.2314	0.32629	0.4786		0.077094	0.83236	0.99861		0.31546	0.3746	0.90718
Splicing factor 3A subunit 1	Splicing factor 3A subunit 1	SF3A1	PR	0.42404	0.0126878	0.0246948	na		-0.34423	0.13723	0.319		-0.10713	0.76832	0.99861		0.25968	0.46874	0.90718
Splicing factor 3B subunit 1	Splicing factor 3B subunit 1	SF3B1	PR	0.443337	0.00834073	0.0176563	na		-0.39133	0.087969	0.26742		-0.19123	0.59664	0.99946		-0.055828	0.87826	0.97634
Splicing factor 3B subunit 3	Splicing factor 3B subunit 3	SF3B3	PR	0.175526	9.81806e-06	0.000234375	na		-0.33541	0.14826	0.31112		0.15149	0.67611	0.99946		0.39763	0.25516	0.87144
Splicing factor 3B subunit 5	Splicing factor 3B subunit 5	SF3B5	PR	0.164372	7.62726e-05	0.000600942	na		-0.34687	0.13405	0.34809		0.05803	0.87349	0.99322		0.19418	0.59088	0.93425
14-3-3 protein sigma	14-3-3 protein sigma	SFN	PR	0.156039	0.000182672	0.00187244	na		-0.28274	0.22709	0.37592		0.3556	0.31325	0.99946		0.41122	0.23776	0.87144
Splicing factor, proline- and glutamine-rich	Splicing factor, proline- and glutamine-rich	SFPQ	PR	0.323132	0.000339945	0.00226818	na		-0.34042	0.14192	0.30771		0.14066	0.69831	0.99946		0.44539	0.19706	0.87144
Sideroflexin-1	Sideroflexin-1	SFXN1	PR	0.477195	0.00199723	0.00570374	na		-0.35138	0.12872	0.31319		-0.0056081	0.98773	0.99861		-0.14285	0.69382	0.94918
SH3 domain-binding glutamic acid-rich-like protein 3	SH3 domain-binding glutamic acid-rich-like protein 3	SH3BGRL3	PR	0.578301	0.00115457	0.00361516	na		-0.43926	0.052653	0.26544		-0.18666	0.60561	0.99946		0.18298	0.61287	0.9165
SH3 domain-binding protein 1	SH3 domain-binding protein 1	SH3BP1	PR	0.00117672	0.00113064	0.00372391	na		-0.33266	0.15183	0.37227		0.089466	0.80585	0.99322		0.50639	0.13529	0.93425
Endophilin-A2	Endophilin-A2	SH3GL1	PR	0.401509	0.000765644	0.00266785	na		-0.29321	0.20961	0.37224		0.086004	0.81325	0.99861		-0.41392	0.23438	0.90718
Endophilin-B1	Endophilin-B1	SH3GLB1	PR	0.450466	0.0211339	0.0359264	na		-0.062503	0.79349	0.90131		0.29312	0.41111	0.99322		0.29208	0.41285	0.93425
Serine hydroxymethyltransferase, cytosolic	Serine hydroxymethyltransferase, cytosolic	SHMT1	PR	0.000936251	0.00632814	0.0135853	0.14		-0.42395	0.062485	0.26514		-0.36184	0.30422	0.99322		0.007908	0.9827	0.9897
WD repeat-containing protein 61	WD repeat-containing protein 61	SKIC8	PR	0.407451	0.0171556	0.0320291	na		0.043457	0.85565	0.93491		0.23538	0.51269	0.99322		0.33661	0.34158	0.93425
Solute carrier family 12 member 2	Solute carrier family 12 member 2	SLC12A2	PR	0.247657	0.00657463	0.0146669	na		-0.38505	0.093641	0.26755		-0.04995	0.89101	0.99946		-0.0018614	0.99593	0.99797
Mitochondrial 2-oxoglutarate/malate carrier protein	Mitochondrial 2-oxoglutarate/malate carrier protein	SLC25A11	PR	0.665816	0.00358166	0.00889997	na		-0.22081	0.34952	0.50345		0.17636	0.62598	0.99861		0.1221	0.73684	0.95971
Calcium-binding mitochondrial carrier protein Aralar2	Calcium-binding mitochondrial carrier protein Aralar2	SLC25A13	PR	0.465526	0.00282725	0.00744953	na		-0.30022	0.19841	0.36332		-0.020231	0.95576	0.99861		0.16627	0.64617	0.94285
Phosphate carrier protein, mitochondrial	Phosphate carrier protein, mitochondrial	SLC25A3	PR	0.403163	7.09811e-05	0.000579679	na		-0.39142	0.087891	0.26742		0.095729	0.7925	0.99946		0.22787	0.52663	0.90885
ADP/ATP translocase 1	ADP/ATP translocase 1	SLC25A4	PR	0.451827	9.85282e-05	0.000707428	na		-0.35104	0.12912	0.29592		0.085026	0.81534	0.99946		0.39796	0.25473	0.87144
ADP/ATP translocase 2	ADP/ATP translocase 2	SLC25A5	PR	0.338953	1.01236e-05	0.000239621	0.02		-0.41806	0.066611	0.26544		0.002027	0.99557	0.99946		0.17601	0.62669	0.91897
ADP/ATP translocase 3	ADP/ATP translocase 3	SLC25A6	PR	0.543377	0.0107961	0.0216309	na		-0.22995	0.32941	0.45761		-0.10658	0.76948	0.99946		0.13015	0.72006	0.95237
4F2 cell-surface antigen heavy chain	4F2 cell-surface antigen heavy chain	SLC3A2	PR	0.238188	0.0031469	0.0080488	0.02		-0.32575	0.16104	0.33928		0.021225	0.95359	0.99861		0.59794	0.067879	0.90718
SRA stem-loop-interacting RNA-binding protein, mitochondrial	SRA stem-loop-interacting RNA-binding protein, mitochondrial	SLIRP	PR	0.0619088	0.000258933	0.0019546	na		-0.40202	0.078896	0.27796		0.051617	0.88739	0.99861		0.50954	0.13248	0.90718
SWI/SNF-related matrix-associated actin-dependent regulator of chromatin subfamily D member 2	SWI/SNF-related matrix-associated actin-dependent regulator of chromatin subfamily D member 2	SMARCD2	PR	0.0293129	0.0239019	0.0405085	0.04		-0.26966	0.25024	0.46301		0.021341	0.95334	0.99479		0.30592	0.38999	0.93425
Structural maintenance of chromosomes protein 1A	Structural maintenance of chromosomes protein 1A	SMC1A	PR	0.172153	0.000824647	0.00280883	na		-0.056275	0.8137	0.91582		0.5811	0.078112	0.99322		0.32043	0.3667	0.93425
Structural maintenance of chromosomes protein 3	Structural maintenance of chromosomes protein 3	SMC3	PR	0.126433	0.000154988	0.000924783	na		-0.33889	0.14384	0.3243		0.35801	0.30975	0.99861		0.46997	0.1705	0.90718
Structural maintenance of chromosomes flexible hinge domain-containing protein 1	Structural maintenance of chromosomes flexible hinge domain-containing protein 1	SMCHD1	PR	0.00396839	0.00247812	0.00651731	na		-0.15918	0.50266	0.67308		0.41566	0.23223	0.99322		0.39088	0.26405	0.93425
Spermine synthase	Spermine synthase	SMS	PR	0.130016	0.00411615	0.0111066	na		-0.2825	0.22752	0.39169		0.57293	0.083415	0.99861		0.091272	0.802	0.96153
WD40 repeat-containing protein SMU1	WD40 repeat-containing protein SMU1	SMU1	PR	0.205991	1.40205e-05	0.00028172	na		-0.20866	0.37732	0.52916		0.27496	0.44198	0.99861		0.37959	0.27931	0.90718
U1 small nuclear ribonucleoprotein A	U1 small nuclear ribonucleoprotein A	SNRPA	PR	0.175695	0.00485596	0.011426	na		-0.26501	0.25881	0.41731		0.19194	0.59527	0.99861		0.23981	0.50456	0.90718
Small nuclear ribonucleoprotein-associated proteins B and B'	Small nuclear ribonucleoprotein-associated proteins B and B'	SNRPB	PR	0.241027	0.000162988	0.000945287	na		-0.42659	0.060692	0.26544		-0.063329	0.86202	0.99946		0.40225	0.24917	0.87144
Small nuclear ribonucleoprotein Sm D1	Small nuclear ribonucleoprotein Sm D1	SNRPD1	PR	0.234428	0.000714227	0.00338682	na		-0.41121	0.071669	0.27712		-0.029049	0.93651	0.99861		0.36021	0.30657	0.90718
Small nuclear ribonucleoprotein Sm D3	Small nuclear ribonucleoprotein Sm D3	SNRPD3	PR	0.376286	0.000248862	0.00124342	na		-0.44231	0.050844	0.26544		-0.19726	0.5849	0.99946		0.44908	0.19293	0.87144
NHP2-like protein 1	NHP2-like protein 1	SNU13	PR	0.218576	0.00275274	0.00728477	na		-0.29645	0.20439	0.36862		0.19852	0.58246	0.99861		0.37407	0.28693	0.90718
Sorting nexin-1	Sorting nexin-1	SNX1	PR	0.527408	0.00112135	0.0035379	na		-0.43614	0.054551	0.25968		-0.2205	0.54044	0.99861		0.052516	0.88544	0.98776
Sorting nexin-2	Sorting nexin-2	SNX2	PR	0.571374	0.000366681	0.00158536	na		-0.27731	0.23652	0.38124		0.16162	0.65555	0.99946		0.084853	0.81571	0.96763
Sorting nexin-5	Sorting nexin-5	SNX5	PR	0.480087	9.46467e-05	0.000692011	na		-0.42836	0.059518	0.26483		-0.10623	0.77022	0.99861		0.29922	0.40097	0.90718
Superoxide dismutase [Cu-Zn]	Superoxide dismutase [Cu-Zn]	SOD1	PR	0.529012	0.000475077	0.00187945	na		-0.28127	0.22962	0.37631		0.26109	0.46623	0.99946		0.14426	0.69091	0.94091
Sorbitol dehydrogenase	Sorbitol dehydrogenase	SORD	PR	0.179421	4.0215e-05	0.000428704	na		-0.37643	0.10187	0.29056		0.23049	0.52174	0.99861		0.28357	0.42721	0.90718
SPATS2-like protein	SPATS2-like protein	SPATS2L	PR	0.523711	0.0222476	0.0393276	na		0.04738	0.84276	0.92672		0.49572	0.1451	0.99322		0.27539	0.44123	0.93425
Signal peptidase complex subunit 2	Signal peptidase complex subunit 2	SPCS2	PR	0.419423	0.0140193	0.0256088	na		-0.43917	0.052707	0.25968		-0.27948	0.4342	0.99861		0.49844	0.14255	0.90718
Sepiapterin reductase	Sepiapterin reductase	SPR	PR	0.187751	3.80417e-06	0.000173179	0.78		-0.3338	0.15034	0.32562		0.58619	0.074917	0.99861		0.12785	0.72485	0.95684
Small proline-rich protein 3	Small proline-rich protein 3	SPRR3	PR	0.145021	0.0295786	0.048768	na		-0.10187	0.66912	0.80952		0.49551	0.14529	0.99322		0.066177	0.85587	0.9493
Spectrin alpha chain, non-erythrocytic 1	Spectrin alpha chain, non-erythrocytic 1	SPTAN1	PR	0.620588	0.00139105	0.00422683	na		-0.29565	0.20566	0.35926		0.062914	0.86292	0.99946		0.069001	0.84978	0.97575
Spectrin beta chain, non-erythrocytic 1	Spectrin beta chain, non-erythrocytic 1	SPTBN1	PR	0.425703	1.79897e-05	0.00029469	na		-0.27033	0.24901	0.39488		0.44726	0.19496	0.99946		0.16836	0.64198	0.92453
Sulfide:quinone oxidoreductase, mitochondrial	Sulfide:quinone oxidoreductase, mitochondrial	SQOR	PR	0.468422	0.000123008	0.000804596	na		-0.39629	0.083667	0.26544		-0.086064	0.81312	0.99946		0.15561	0.66773	0.93693
Proto-oncogene tyrosine-protein kinase Src	Proto-oncogene tyrosine-protein kinase Src	SRC	PR	0.312504	0.00234098	0.00644807	na		-0.19235	0.41654	0.56618		0.3959	0.25742	0.99861		0.37968	0.27918	0.90718
Sorcin	Sorcin	SRI	PR	0.439503	5.53134e-06	0.000189158	0.04		-0.39508	0.084705	0.26544		0.34184	0.33364	0.99946		-0.34381	0.33069	0.87144
Signal recognition particle 19 kDa protein	Signal recognition particle 19 kDa protein	SRP19	PR	0.313354	0.00908243	0.0179029	na		-0.40983	0.072716	0.27224		-0.10843	0.76558	0.99322		-0.45189	0.18982	0.93425
SRSF protein kinase 1	SRSF protein kinase 1	SRPK1	PR	0.207293	0.00163849	0.00484797	na		-0.43325	0.056361	0.25541		-0.17743	0.62387	0.99322		0.38951	0.26587	0.93425
Signal recognition particle receptor subunit beta	Signal recognition particle receptor subunit beta	SRPRB	PR	0.573795	0.0140561	0.0268895	na		-0.37287	0.10541	0.29363		-0.098439	0.78674	0.99861		-0.072544	0.84214	0.97772
Serine/arginine repetitive matrix protein 2	Serine/arginine repetitive matrix protein 2	SRRM2	PR	0.096602	0.0030837	0.00766261	na		-0.27543	0.23986	0.46097		0.017598	0.96152	0.99479		0.37878	0.28041	0.93425
Serine/arginine-rich splicing factor 10	Serine/arginine-rich splicing factor 10	SRSF10	PR	0.214301	0.00012707	0.00081776	na		-0.18952	0.42356	0.61013		0.3631	0.30241	0.99322		0.32062	0.36641	0.93425
Serine/arginine-rich splicing factor 2	Serine/arginine-rich splicing factor 2	SRSF2	PR	0.409237	0.000258016	0.00126873	na		-0.35921	0.11984	0.30626		0.01226	0.97318	0.99861		0.44615	0.19621	0.90718
Serine/arginine-rich splicing factor 3	Serine/arginine-rich splicing factor 3	SRSF3	PR	0.327509	6.76584e-05	0.000566117	na		-0.33814	0.14479	0.3243		0.11601	0.74961	0.99861		0.55633	0.094893	0.90718
Serine/arginine-rich splicing factor 7	Serine/arginine-rich splicing factor 7	SRSF7	PR	0.324024	4.7949e-05	0.000476589	na		-0.42409	0.062387	0.26544		-0.048137	0.89494	0.99946		0.39955	0.25266	0.87144
Serine/arginine-rich splicing factor 9	Serine/arginine-rich splicing factor 9	SRSF9	PR	0.211763	0.00219805	0.00610254	na		-0.41783	0.066779	0.26924		-0.17033	0.63803	0.99322		0.5983	0.067669	0.93425
Lupus La protein	Lupus La protein	SSB	PR	0.291827	0.000318005	0.00144421	na		-0.35239	0.12755	0.29592		0.19302	0.59316	0.99946		0.28165	0.43049	0.90222
Single-stranded DNA-binding protein, mitochondrial	Single-stranded DNA-binding protein, mitochondrial	SSBP1	PR	0.299908	0.000319761	0.00144748	na		-0.42031	0.065011	0.26904		0.0012741	0.99721	0.99861		-0.33183	0.34891	0.90718
Translocon-associated protein subunit delta	Translocon-associated protein subunit delta	SSR4	PR	0.596252	0.02862	0.0483579	na		-0.39475	0.084986	0.26544		-0.1461	0.68714	0.99946		-0.02568	0.94386	0.99428
FACT complex subunit SSRP1	FACT complex subunit SSRP1	SSRP1	PR	0.20052	5.5288e-06	0.000189158	na		-0.38095	0.097494	0.28783		0.22871	0.52505	0.99861		0.13553	0.70892	0.95684
Hsc70-interacting protein	Hsc70-interacting protein	ST13	PR	0.671738	9.26236e-05	0.000686454	na		-0.40677	0.075095	0.26544		-0.07246	0.84232	0.99946		0.2383	0.50732	0.90228
Stabilin-1	Stabilin-1	STAB1	PR	0.290863	0.00332055	0.00837785	na		-0.26957	0.2504	0.46301		0.06365	0.86133	0.99322		-0.43953	0.20374	0.93425
Signal transducing adapter molecule 1	Signal transducing adapter molecule 1	STAM	PR	0.282723	0.000287923	0.00135154	na		-0.3503	0.12998	0.34435		0.02206	0.95177	0.99479		-0.14152	0.69654	0.93425
START domain-containing protein 10	START domain-containing protein 10	STARD10	PR	0.000255548	8.74e-05	0.00187244	0.38		-0.42649	0.060764	0.26159		0.33034	0.3512	0.99322		0.15198	0.67511	0.93425
Signal transducer and activator of transcription 1-alpha/beta	Signal transducer and activator of transcription 1-alpha/beta	STAT1	PR	0.33754	0.00361051	0.0085969	na		-0.27903	0.23351	0.37941		0.027385	0.94014	0.99946		0.4201	0.22677	0.87144
STE20/SPS1-related proline-alanine-rich protein kinase	STE20/SPS1-related proline-alanine-rich protein kinase	STK39	PR	0.346577	3.85773e-05	0.000419622	0.08		-0.30757	0.18711	0.35867		0.33804	0.33939	0.99861		0.34451	0.32963	0.90718
Stathmin	Stathmin	STMN1	PR	0.360854	0.000313141	0.00142909	0.06		-0.25221	0.28339	0.42185		0.39197	0.2626	0.99946		0.35159	0.31912	0.87144
Syntaxin-12	Syntaxin-12	STX12	PR	0.54748	0.0173524	0.0322671	na		-0.37799	0.10034	0.31531		-0.11565	0.75037	0.99322		-0.54452	0.10364	0.93425
Syntaxin-4	Syntaxin-4	STX4	PR	0.174226	0.00705092	0.0149711	na		-0.27843	0.23457	0.45957		0.0020394	0.99554	0.99998		0.1178	0.74586	0.93425
Syntaxin-binding protein 3	Syntaxin-binding protein 3	STXBP3	PR	0.483891	0.00487913	0.0114709	na		-0.1865	0.4311	0.61863		0.12368	0.73355	0.99322		0.53728	0.10925	0.93425
Activated RNA polymerase II transcriptional coactivator p15	Activated RNA polymerase II transcriptional coactivator p15	SUB1	PR	0.467497	0.00579536	0.0125088	na		-0.31503	0.17609	0.33423		-0.028573	0.93755	0.99946		0.19733	0.58476	0.91645
Succinate--CoA ligase [ADP-forming] subunit beta, mitochondrial	Succinate--CoA ligase [ADP-forming] subunit beta, mitochondrial	SUCLA2	PR	0.37026	1.93508e-05	0.000302394	na		-0.40161	0.07923	0.27796		0.00808	0.98233	0.99861		0.12625	0.72819	0.95684
Succinate--CoA ligase [GDP-forming] subunit beta, mitochondrial	Succinate--CoA ligase [GDP-forming] subunit beta, mitochondrial	SUCLG2	PR	0.322464	0.000814964	0.00364191	na		-0.22193	0.34701	0.46842		0.34532	0.32843	0.99946		0.052728	0.88498	0.97634
Protein SGT1 homolog	Protein SGT1 homolog	SUGT1	PR	0.320957	0.000155962	0.000926814	na		-0.27713	0.23684	0.40137		0.32726	0.35599	0.99861		0.19431	0.59063	0.92036
Sulfotransferase family cytosolic 1B member 1	Sulfotransferase family cytosolic 1B member 1	SULT1B1	PR	0.380051	0.0230003	0.040427	na		-0.27429	0.24189	0.46158		-0.060006	0.86921	0.99322		-0.014179	0.96899	0.98269
Inactive C-alpha-formylglycine-generating enzyme 2	Inactive C-alpha-formylglycine-generating enzyme 2	SUMF2	PR	0.323552	0.0211339	0.0359264	na		-0.32473	0.16243	0.3868		-0.05016	0.89055	0.99322		-0.22777	0.5268	0.93425
Surfeit locus protein 4	Surfeit locus protein 4	SURF4	PR	0.53406	0.00386099	0.00949274	na		-0.43039	0.058189	0.26232		-0.21256	0.55548	0.99861		0.19307	0.59306	0.92198
Heterogeneous nuclear ribonucleoprotein Q	Heterogeneous nuclear ribonucleoprotein Q	SYNCRIP	PR	0.356502	3.06365e-05	0.000375043	na		-0.40315	0.077981	0.26544		0.0005724	0.99875	0.99946		0.48859	0.15188	0.87144
Transgelin-2	Transgelin-2	TAGLN2	PR	0.542109	0.000235013	0.00119287	na		-0.23352	0.32175	0.45239		0.19145	0.59622	0.99946		0.56321	0.090018	0.87144
TAR DNA-binding protein 43	TAR DNA-binding protein 43	TARDBP	PR	0.393916	0.000144046	0.000879447	na		-0.24521	0.29739	0.45492		0.2895	0.41718	0.99861		0.47154	0.16888	0.90718
Tubulin-specific chaperone D	Tubulin-specific chaperone D	TBCD	PR	0.172941	0.000210099	0.00110927	na		-0.36846	0.10992	0.32635		-0.15387	0.67127	0.99322		0.36572	0.29867	0.93425
F-box-like/WD repeat-containing protein TBL1XR1	F-box-like/WD repeat-containing protein TBL1XR1	TBL1XR1	PR	0.000552392	0.00178425	0.00505416	na		-0.27324	0.24377	0.46301		0.28662	0.42203	0.99322		-0.062983	0.86277	0.9493
Transducin beta-like protein 2	Transducin beta-like protein 2	TBL2	PR	0.277824	0.00579536	0.0125088	na		-0.27053	0.24866	0.40529		0.04092	0.91064	0.99861		0.54689	0.10185	0.90718
Thromboxane-A synthase	Thromboxane-A synthase	TBXAS1	PR	0.411574	0.00292695	0.00764017	na		-0.30603	0.18944	0.36001		-0.0048598	0.98937	0.99861		0.0066402	0.98548	0.9975
Treacle protein	Treacle protein	TCOF1	PR	0.306889	0.000439639	0.00215423	na		-0.23909	0.31001	0.51232		0.20556	0.56885	0.99322		0.10237	0.7784	0.93425
Transcription factor A, mitochondrial	Transcription factor A, mitochondrial	TFAM	PR	0.169715	0.000416512	0.00171328	na		-0.27462	0.2413	0.46158		0.19404	0.59117	0.99322		0.41416	0.23409	0.93425
Protein TFG	Protein TFG	TFG	PR	0.585161	0.00506782	0.0118447	na		-0.28788	0.21839	0.38126		0.036617	0.92001	0.99861		0.26427	0.46063	0.90718
Transferrin receptor protein 1	Transferrin receptor protein 1	TFRC	PR	0.430151	0.0206721	0.0369881	na		-0.3138	0.17788	0.34869		-0.1242	0.73246	0.99861		0.51013	0.13195	0.90718
Protein-glutamine gamma-glutamyltransferase 2	Protein-glutamine gamma-glutamyltransferase 2	TGM2	PR	0.37132	0.00282727	0.00705051	na		-0.43041	0.05818	0.26544		-0.3127	0.37902	0.99946		0.45613	0.18518	0.87144
Trans-Golgi network integral membrane protein 2	Trans-Golgi network integral membrane protein 2	TGOLN2	PR	0.205315	0.00670663	0.01489	na		-0.31623	0.17436	0.34537		0.046071	0.89943	0.99861		0.12846	0.72358	0.95684
Protein THEM6	Protein THEM6	THEM6	PR	0.31621	0.00431858	0.0103981	na		-0.0054326	0.98186	0.99224		0.39708	0.25587	0.99322		0.41462	0.23352	0.93425
THO complex subunit 2	THO complex subunit 2	THOC2	PR	0.123824	0.00359789	0.0085969	na		-0.32923	0.15636	0.3761		0.017341	0.96208	0.99479		0.45425	0.18723	0.93425
Thimet oligopeptidase	Thimet oligopeptidase	THOP1	PR	0.0890107	0.00459001	0.0104738	na		-0.34672	0.13422	0.34809		-0.1133	0.75531	0.99322		0.2896	0.41701	0.93425
Thyroid hormone receptor-associated protein 3	Thyroid hormone receptor-associated protein 3	THRAP3	PR	0.22076	0.000106215	0.000737955	na		-0.32415	0.16323	0.33941		0.079573	0.82703	0.99861		0.44335	0.19937	0.90718
THUMP domain-containing protein 1	THUMP domain-containing protein 1	THUMPD1	PR	0.39688	0.00243065	0.00661879	na		-0.41386	0.06968	0.27587		-0.14858	0.68207	0.99861		-0.2072	0.56571	0.91234
Fructose-2,6-bisphosphatase TIGAR	Fructose-2,6-bisphosphatase TIGAR	TIGAR	PR	0.439526	0.00607441	0.0137676	na		-0.23124	0.32662	0.52663		0.12809	0.72435	0.99322		0.30683	0.3885	0.93425
Mitochondrial import inner membrane translocase subunit Tim13	Mitochondrial import inner membrane translocase subunit Tim13	TIMM13	PR	0.17274	0.000263821	0.00128593	na		-0.28645	0.22079	0.44312		0.18391	0.61102	0.99322		0.27409	0.44348	0.93425
Mitochondrial import inner membrane translocase subunit Tim9	Mitochondrial import inner membrane translocase subunit Tim9	TIMM9	PR	0.194713	0.00328964	0.00832173	na		-0.43709	0.053967	0.24981		-0.14989	0.67939	0.99322		0.34349	0.33117	0.93425
Triokinase/FMN cyclase	Triokinase/FMN cyclase	TKFC	PR	0.347744	0.000131049	0.000830434	na		-0.19931	0.39953	0.5495		0.26593	0.45771	0.99861		0.25103	0.48419	0.90718
Transmembrane 9 superfamily member 2	Transmembrane 9 superfamily member 2	TM9SF2	PR	0.299427	0.000925291	0.00306928	na		-0.40724	0.074727	0.26544		-0.073571	0.83993	0.99946		-0.015438	0.96624	0.99428
Transmembrane 9 superfamily member 3	Transmembrane 9 superfamily member 3	TM9SF3	PR	0.264014	8.73261e-07	0.000123673	0.02		-0.32182	0.16645	0.33987		0.14202	0.69551	0.99861		0.17023	0.63822	0.94285
Transmembrane 9 superfamily member 4	Transmembrane 9 superfamily member 4	TM9SF4	PR	0.000360788	0.000202827	0.00187244	na		-0.39247	0.08697	0.27796		0.071664	0.84404	0.99861		0.4768	0.16352	0.90718
Calcium load-activated calcium channel	Calcium load-activated calcium channel	TMCO1	PR	0.371735	0.00211793	0.00594511	na		-0.30602	0.18946	0.36001		-0.0047596	0.98959	0.99861		0.58752	0.074098	0.90718
Transmembrane emp24 domain-containing protein 10	Transmembrane emp24 domain-containing protein 10	TMED10	PR	0.571009	0.00217668	0.00606733	na		-0.40503	0.076468	0.26544		-0.12509	0.7306	0.99946		0.14531	0.68877	0.94091
Transmembrane emp24 domain-containing protein 5	Transmembrane emp24 domain-containing protein 5	TMED5	PR	0.260984	0.00361051	0.0085969	na		-0.35593	0.12351	0.30696		-0.06551	0.85731	0.99861		0.25199	0.48246	0.90718
Transmembrane protein 14C	Transmembrane protein 14C	TMEM14C	PR	0.282281	0.000379092	0.00162495	na		-0.32838	0.1575	0.33549		-0.016981	0.96286	0.99861		0.54229	0.10535	0.90718
Transmembrane protein 205	Transmembrane protein 205	TMEM205	PR	0.621797	0.026874	0.046105	0.12		-0.33085	0.1542	0.33166		-0.1246	0.73164	0.99861		0.0023536	0.99485	0.9975
Transmembrane protein 70, mitochondrial	Transmembrane protein 70, mitochondrial	TMEM70	PR	0.000968103	0.00299961	0.0074603	na		-0.38428	0.094357	0.30577		-0.12339	0.73416	0.99322		0.22737	0.52756	0.93425
Lamina-associated polypeptide 2, isoforms beta/gamma	Lamina-associated polypeptide 2, isoform alpha	TMPO	PR	0.26972	1.54156e-05	0.000290154	na		-0.14871	0.53149	0.63699		-0.037041	0.91908	0.99946		0.49952	0.14156	0.87144
Transportin-1	Transportin-1	TNPO1	PR	0.528258	0.012026	0.0237207	na		-0.34194	0.14004	0.32293		-0.13212	0.71597	0.99861		0.52406	0.11997	0.90718
Transportin-3	Transportin-3	TNPO3	PR	0.263369	0.00695103	0.0152388	na		-0.25319	0.28145	0.48562		0.13046	0.71942	0.99322		0.23961	0.50492	0.93425
Toll-interacting protein	Toll-interacting protein	TOLLIP	PR	0.666051	0.0176123	0.0326417	na		-0.22785	0.33397	0.53437		0.039716	0.91326	0.99322		0.25017	0.48573	0.93425
Target of Myb protein 1	Target of Myb protein 1	TOM1	PR	0.526778	0.00861455	0.0181042	na		-0.32015	0.16878	0.34039		-0.042401	0.90741	0.99861		0.18132	0.61615	0.93433
Mitochondrial import receptor subunit TOM34	Mitochondrial import receptor subunit TOM34	TOMM34	PR	0.223289	0.00546201	0.0126182	na		-0.20723	0.38068	0.57807		0.23112	0.52057	0.99322		0.46267	0.17815	0.93425
Mitochondrial import receptor subunit TOM40 homolog	Mitochondrial import receptor subunit TOM40 homolog	TOMM40	PR	0.113156	0.00282727	0.00705051	na		-0.29206	0.21148	0.37349		0.11164	0.7588	0.99861		0.24923	0.48743	0.90718
Mitochondrial import receptor subunit TOM70	Mitochondrial import receptor subunit TOM70	TOMM70	PR	0.281953	5.81895e-05	0.00116111	0.7		-0.34965	0.13075	0.29592		0.54751	0.10138	0.99946		0.44221	0.20066	0.87144
DNA topoisomerase 1	DNA topoisomerase 1	TOP1	PR	0.214078	0.000599005	0.00222476	na		-0.36995	0.10839	0.27904		-0.024479	0.94648	0.99946		0.56493	0.088828	0.87144
DNA topoisomerase 2-beta	DNA topoisomerase 2-beta	TOP2B	PR	0.173204	0.000138316	0.000856561	na		-0.39908	0.081321	0.27796		-0.061521	0.86593	0.99861		0.23326	0.51661	0.90718
Tumor protein D52	Tumor protein D52	TPD52	PR	0.175465	0.00058284	0.00242604	na		-0.32871	0.15705	0.31785		0.14984	0.67948	0.99946		0.35573	0.31306	0.87144
Tumor protein D54	Tumor protein D54	TPD52L2	PR	0.497917	0.0140193	0.0256088	na		-0.15852	0.50443	0.61562		0.19057	0.59793	0.99946		0.2729	0.44553	0.90222
Triosephosphate isomerase	Triosephosphate isomerase	TPI1	PR	0.578108	0.000112543	0.000762942	na		-0.40587	0.075801	0.26544		-0.0073074	0.98402	0.99946		0.048413	0.89435	0.97865
Thiopurine S-methyltransferase	Thiopurine S-methyltransferase	TPMT	PR	0.415208	0.015494	0.0292793	na		-0.3225	0.16551	0.3868		-0.047306	0.89675	0.99322		-0.19812	0.58322	0.93425
Tripeptidyl-peptidase 1	Tripeptidyl-peptidase 1	TPP1	PR	0.564562	0.0227202	0.0401336	na		-0.26524	0.25838	0.4045		-0.028143	0.93849	0.99946		0.34005	0.33636	0.87144
Tubulin polymerization-promoting protein family member 3	Tubulin polymerization-promoting protein family member 3	TPPP3	PR	0.386864	0.0140193	0.0256088	na		-0.17467	0.46139	0.59404		0.087772	0.80947	0.99861		0.58862	0.073427	0.90718
Nucleoprotein TPR	Nucleoprotein TPR	TPR	PR	0.204142	2.27985e-06	0.000163228	0.06		-0.29106	0.21312	0.37484		0.20548	0.56901	0.99861		0.19225	0.59465	0.92272
Translationally-controlled tumor protein	Translationally-controlled tumor protein	TPT1	PR	0.538786	0.0046119	0.0109347	na		-0.36527	0.11328	0.28231		-0.22893	0.52465	0.99946		0.45433	0.18714	0.87144
Transformer-2 protein homolog alpha	Transformer-2 protein homolog alpha	TRA2A	PR	0.0852197	0.00168423	0.00484797	0.14		-0.31251	0.17976	0.39912		0.012233	0.97324	0.99591		0.43443	0.20964	0.93425
Translocating chain-associated membrane protein 1	Translocating chain-associated membrane protein 1	TRAM1	PR	0.390576	0.00562706	0.0129106	na		-0.30958	0.18409	0.35553		-0.014372	0.96857	0.99861		0.21984	0.54167	0.90718
Heat shock protein 75 kDa, mitochondrial	Heat shock protein 75 kDa, mitochondrial	TRAP1	PR	0.30022	0.00579536	0.0125088	na		-0.027647	0.90789	0.93557		0.58662	0.074649	0.99946		0.49872	0.1423	0.87144
E3 ubiquitin-protein ligase TRIM21	E3 ubiquitin-protein ligase TRIM21	TRIM21	PR	0.000899065	0.00299961	0.0074603	na		-0.26935	0.25081	0.46301		0.13561	0.70875	0.99322		0.41694	0.23064	0.93425
E3 ubiquitin/ISG15 ligase TRIM25	E3 ubiquitin/ISG15 ligase TRIM25	TRIM25	PR	0.281551	2.84411e-05	0.000374453	na		-0.34621	0.13484	0.31859		0.17434	0.63002	0.99861		0.22463	0.53267	0.90718
Transcription intermediary factor 1-beta	Transcription intermediary factor 1-beta	TRIM28	PR	0.313737	0.000751662	0.00263743	na		-0.31374	0.17797	0.33423		0.098831	0.78591	0.99946		0.34316	0.33167	0.87144
Telomerase RNA component interacting RNase	Telomerase RNA component interacting RNase	TRIR	PR	0.00100201	0.00178425	0.00505416	0.06		-0.37881	0.099544	0.31395		-0.080484	0.82508	0.99322		0.34518	0.32863	0.93425
Elongation factor Ts, mitochondrial	Elongation factor Ts, mitochondrial	TSFM	PR	0.370667	0.00125943	0.00389546	na		-0.32322	0.16452	0.3868		0.019099	0.95824	0.99479		0.033069	0.92774	0.96968
Tetraspanin-6	Tetraspanin-6	TSPAN6	PR	0.00154445	0.00817018	0.0167175	na		-0.36027	0.11867	0.33573		-0.20436	0.57117	0.99322		0.047926	0.8954	0.96127
Tetraspanin-8	Tetraspanin-8	TSPAN8	PR	0.0420298	0.000246128	0.00187244	0.82		-0.36525	0.1133	0.30431		0.27481	0.44223	0.99861		-0.55649	0.094775	0.90718
Thiosulfate sulfurtransferase	Thiosulfate sulfurtransferase	TST	PR	0.153301	0.000768539	0.00282438	0.06		-0.3062	0.18918	0.34343		0.32955	0.35242	0.99946		0.27022	0.45019	0.90222
Tetratricopeptide repeat protein 38	Tetratricopeptide repeat protein 38	TTC38	PR	0.00847021	0.000163049	0.00187244	0.06		-0.23749	0.31335	0.51495		0.45525	0.18614	0.99322		0.24542	0.49433	0.93425
Tubulin--tyrosine ligase-like protein 12	Tubulin--tyrosine ligase-like protein 12	TTLL12	PR	0.0946171	0.000182672	0.00187244	0.3		-0.32143	0.16699	0.34022		0.39497	0.25865	0.99861		0.40237	0.249	0.90718
Tubulin alpha-1A chain	Tubulin alpha-1A chain	TUBA1A	PR	0.704105	8.04397e-05	0.000625816	na		-0.12443	0.6012	0.69071		0.56161	0.091139	0.99946		0.30577	0.39024	0.89588
Tubulin alpha-1C chain	Tubulin alpha-1C chain	TUBA1C	PR	0.459972	0.00150798	0.00451425	na		-0.20405	0.38818	0.50655		0.2667	0.45634	0.99946		0.38164	0.2765	0.87144
Tubulin alpha-4A chain	Tubulin alpha-4A chain	TUBA4A	PR	0.417844	1.65016e-05	0.00029469	na		-0.40813	0.074035	0.26544		0.020379	0.95544	0.99946		0.41052	0.23863	0.87144
Tubulin alpha chain-like 3	Tubulin alpha chain-like 3	TUBAL3	PR	0.603324	0.0229657	0.0404052	na		-0.38748	0.091413	0.26742		-0.18022	0.61832	0.99946		-0.34191	0.33355	0.87144
Tubulin beta chain	Tubulin beta chain	TUBB	PR	0.528294	0.000998966	0.00327091	na		-0.18434	0.43657	0.55205		0.3764	0.28369	0.99946		0.41574	0.23212	0.87144
Tubulin beta-4A chain	Tubulin beta-4A chain	TUBB4A	PR	0.434283	0.00175232	0.00510348	0.02		-0.21816	0.35548	0.47527		0.022482	0.95085	0.99946		0.28916	0.41775	0.90222
Tubulin beta-4B chain	Tubulin beta-4B chain	TUBB4B	PR	0.596026	0.000162899	0.000945287	na		-0.19193	0.41756	0.53283		0.475	0.16535	0.99946		0.49471	0.14605	0.87144
Elongation factor Tu, mitochondrial	Elongation factor Tu, mitochondrial	TUFM	PR	0.250056	1.6895e-05	0.00029469	na		-0.4066	0.075226	0.26544		0.13907	0.7016	0.99946		0.32571	0.3584	0.88984
Twinfilin-1	Twinfilin-1	TWF1	PR	0.231099	0.00231026	0.0072122	na		-0.29668	0.20402	0.36862		0.25802	0.47168	0.99861		0.18674	0.60545	0.92569
Thioredoxin-like protein 1	Thioredoxin-like protein 1	TXNL1	PR	0.527902	0.000411558	0.00169677	na		-0.39731	0.082804	0.27796		-0.09279	0.79876	0.99861		0.23997	0.50426	0.90718
Thioredoxin reductase 1, cytoplasmic	Thioredoxin reductase 1, cytoplasmic	TXNRD1	PR	0.672322	0.00812746	0.017368	na		-0.30521	0.19068	0.36001		-0.04086	0.91077	0.99861		0.47731	0.16301	0.90718
Splicing factor U2AF 35 kDa subunit	Splicing factor U2AF 35 kDa subunit	U2AF1	PR	0.144795	0.000162493	0.000945287	na		-0.33798	0.14499	0.3243		0.14482	0.68976	0.99861		0.31273	0.37897	0.90718
Splicing factor U2AF 65 kDa subunit	Splicing factor U2AF 65 kDa subunit	U2AF2	PR	0.240369	0.000155289	0.000924783	na		-0.44201	0.05102	0.26544		-0.098913	0.78573	0.99946		0.23825	0.50742	0.90228
U2 snRNP-associated SURP motif-containing protein	U2 snRNP-associated SURP motif-containing protein	U2SURP	PR	0.0616919	0.0184873	0.0325568	na		-0.093993	0.69346	0.82697		0.26986	0.45083	0.99322		0.3366	0.3416	0.93425
Ubiquitin-like modifier-activating enzyme 1	Ubiquitin-like modifier-activating enzyme 1	UBA1	PR	0.489313	0.000115102	0.000770937	na		-0.22945	0.3305	0.45761		0.43195	0.21255	0.99946		0.14218	0.69519	0.94091
SUMO-activating enzyme subunit 2	SUMO-activating enzyme subunit 2	UBA2	PR	0.458761	0.0122048	0.0239888	na		-0.12999	0.5849	0.69923		0.19912	0.58129	0.99861		0.4017	0.24988	0.90718
NEDD8-activating enzyme E1 catalytic subunit	NEDD8-activating enzyme E1 catalytic subunit	UBA3	PR	0.304789	0.00163783	0.00481849	na		-0.42197	0.063848	0.26523		-0.13289	0.71437	0.99322		-0.30023	0.39931	0.93425
Ubiquitin-like modifier-activating enzyme 5	Ubiquitin-like modifier-activating enzyme 5	UBA5	PR	0.000454273	0.00610863	0.0131444	na		-0.32113	0.16741	0.3868		0.069405	0.84891	0.99322		0.13262	0.71494	0.93425
Ubiquitin-60S ribosomal protein L40	Ubiquitin-60S ribosomal protein L40	UBA52	PR	0.433061	0.00458974	0.0108914	na		-0.41323	0.070149	0.26544		-0.20945	0.5614	0.99946		-0.042533	0.90713	0.98138
Ubiquitin-associated protein 2-like	Ubiquitin-associated protein 2-like	UBAP2L	PR	0.217881	0.00148924	0.00446773	na		-0.25022	0.28732	0.44464		0.42349	0.22264	0.99861		0.23887	0.50627	0.90718
Ubiquitin-conjugating enzyme E2 D3	Ubiquitin-conjugating enzyme E2 D3	UBE2D3	PR	0.429066	2.53638e-05	0.000357783	0.18		-0.43157	0.05743	0.26232		-0.073646	0.83977	0.99861		0.3165	0.37294	0.90718
SUMO-conjugating enzyme UBC9	SUMO-conjugating enzyme UBC9	UBE2I	PR	0.240345	3.74498e-05	0.000415069	na		-0.37653	0.10177	0.29056		-0.058691	0.87205	0.99861		0.29311	0.41113	0.90718
Ubiquitin-conjugating enzyme E2 K	Ubiquitin-conjugating enzyme E2 K	UBE2K	PR	0.361278	0.000424869	0.00173997	na		-0.39311	0.08641	0.27796		-0.030964	0.93233	0.99861		0.31634	0.37319	0.90718
Ubiquitin-conjugating enzyme E2 L3	Ubiquitin-conjugating enzyme E2 L3	UBE2L3	PR	0.568367	0.000182672	0.00187244	na		-0.37386	0.10442	0.27904		0.14899	0.68123	0.99946		-0.30735	0.38767	0.89588
Ubiquitin/ISG15-conjugating enzyme E2 L6	Ubiquitin/ISG15-conjugating enzyme E2 L6	UBE2L6	PR	0.215078	0.00728456	0.0149711	na		-0.27195	0.24609	0.40529		0.051736	0.88713	0.99861		0.44683	0.19544	0.90718
NEDD8-conjugating enzyme Ubc12	NEDD8-conjugating enzyme Ubc12	UBE2M	PR	0.590221	0.00826444	0.0175582	na		-0.21592	0.36055	0.51091		0.039519	0.91369	0.99861		-0.10879	0.76483	0.96153
Ubiquitin-conjugating enzyme E2 N	Ubiquitin-conjugating enzyme E2 N	UBE2N	PR	0.462815	0.00290104	0.00759381	na		-0.29956	0.19944	0.35381		0.15446	0.67006	0.99946		0.28749	0.42057	0.90222
Ubiquilin-1	Ubiquilin-1	UBQLN1	PR	0.325632	3.79249e-06	0.000173179	na		-0.30049	0.19799	0.36332		0.27774	0.43717	0.99861		0.35755	0.31041	0.90718
Ubiquitin carboxyl-terminal hydrolase isozyme L3	Ubiquitin carboxyl-terminal hydrolase isozyme L3	UCHL3	PR	0.55041	0.000624929	0.00230572	na		-0.1502	0.52735	0.65436		0.52539	0.11887	0.99861		0.45513	0.18626	0.90718
E3 UFM1-protein ligase 1	E3 UFM1-protein ligase 1	UFL1	PR	0.255337	0.0016994	0.00484797	na		-0.39879	0.081557	0.27796		-0.14519	0.689	0.99861		0.3572	0.31093	0.90718
UDP-glucose 6-dehydrogenase	UDP-glucose 6-dehydrogenase	UGDH	PR	0.401293	4.34316e-06	0.000175647	0.16		-0.3181	0.17169	0.32958		0.43677	0.20692	0.99946		-0.40888	0.24071	0.87144
Uridine 5'-monophosphate synthase	Uridine 5'-monophosphate synthase	UMPS	PR	0.0929753	5.2625e-05	0.000505233	na		-0.31943	0.16981	0.38788		0.24856	0.48864	0.99322		0.36563	0.2988	0.93425
Protein unc-45 homolog A	Protein unc-45 homolog A	UNC45A	PR	0.400753	0.00579536	0.0125088	na		-0.14386	0.54512	0.71006		0.35715	0.311	0.99322		0.19768	0.58408	0.93425
Regulator of nonsense transcripts 1	Regulator of nonsense transcripts 1	UPF1	PR	0.335439	0.00400974	0.00975541	na		-0.36726	0.11118	0.30047		-0.077921	0.83058	0.99861		0.35986	0.30707	0.90718
Cytochrome b-c1 complex subunit 7	Cytochrome b-c1 complex subunit 7	UQCRB	PR	0.164301	2.79574e-05	0.000373612	0.1		-0.42361	0.062716	0.26647		0.15987	0.6591	0.99861		0.016272	0.96441	0.9975
Cytochrome b-c1 complex subunit 1, mitochondrial	Cytochrome b-c1 complex subunit 1, mitochondrial	UQCRC1	PR	0.512179	0.00304511	0.00783871	na		-0.18594	0.43252	0.54842		0.29723	0.40427	0.99946		-0.10362	0.77576	0.95976
Cytochrome b-c1 complex subunit 6, mitochondrial	Cytochrome b-c1 complex subunit 6, mitochondrial	UQCRH	PR	0.402969	0.000466374	0.00186157	na		-0.32203	0.16617	0.33987		0.25839	0.47102	0.99861		0.28294	0.42828	0.90718
Ubiquitin carboxyl-terminal hydrolase 10	Ubiquitin carboxyl-terminal hydrolase 10	USP10	PR	0.00260913	0.00490098	0.011156	na		-0.31213	0.18032	0.39912		0.046027	0.89953	0.99322		0.23801	0.50786	0.93425
Ubiquitin carboxyl-terminal hydrolase 14	Ubiquitin carboxyl-terminal hydrolase 14	USP14	PR	0.619319	0.00339971	0.00853903	na		-0.21155	0.3706	0.52132		0.17781	0.62311	0.99861		0.33496	0.34409	0.90718
U4/U6.U5 tri-snRNP-associated protein 2	U4/U6.U5 tri-snRNP-associated protein 2	USP39	PR	0.372409	0.00406502	0.00982996	na		-0.24301	0.30189	0.50581		0.027027	0.94092	0.99479		0.35937	0.30778	0.93425
Ubiquitin carboxyl-terminal hydrolase 7	Ubiquitin carboxyl-terminal hydrolase 7	USP7	PR	0.311407	0.00244541	0.00665047	na		-0.28866	0.21709	0.37971		0.1717	0.63528	0.99861		0.28214	0.42964	0.90718
Probable ubiquitin carboxyl-terminal hydrolase FAF-X	Probable ubiquitin carboxyl-terminal hydrolase FAF-X	USP9X	PR	0.197556	0.00178354	0.00517819	na		-0.3962	0.083744	0.28842		-0.066123	0.85599	0.99322		0.22812	0.52616	0.93425
Vesicle-associated membrane protein 3	Vesicle-associated membrane protein 3	VAMP3	PR	0.560853	0.0017224	0.00504127	na		-0.25647	0.27504	0.43215		0.042834	0.90647	0.99861		0.0095607	0.97909	0.9975
Vesicle-associated membrane protein-associated protein B/C	Vesicle-associated membrane protein-associated protein B/C	VAPB	PR	0.362496	0.000464447	0.00185845	na		-0.41564	0.068368	0.27436		-0.17797	0.62279	0.99861		0.42766	0.21764	0.90718
Valine--tRNA ligase	Valine--tRNA ligase	VARS1	PR	0.465045	0.00132805	0.00407161	na		-0.41433	0.06933	0.26544		-0.15982	0.65919	0.99946		0.33877	0.3383	0.87144
Vasodilator-stimulated phosphoprotein	Vasodilator-stimulated phosphoprotein	VASP	PR	0.535659	0.0172722	0.032174	na		-0.15219	0.52182	0.629		0.34177	0.33376	0.99946		0.209	0.56227	0.91266
Prefoldin subunit 3	Prefoldin subunit 3	VBP1	PR	0.460949	0.00297086	0.00770437	na		-0.17967	0.44846	0.58307		0.23532	0.51281	0.99861		0.2662	0.45723	0.90718
Transitional endoplasmic reticulum ATPase	Transitional endoplasmic reticulum ATPase	VCP	PR	0.548885	0.00047729	0.00188553	0.1		-0.39763	0.082536	0.26544		-0.094275	0.7956	0.99946		0.25797	0.47177	0.90225
Voltage-dependent anion-selective channel protein 1	Voltage-dependent anion-selective channel protein 1	VDAC1	PR	0.26116	0.000437607	0.00177651	na		-0.4311	0.057733	0.26544		-0.049387	0.89223	0.99946		0.32111	0.36562	0.88984
Voltage-dependent anion-selective channel protein 2	Voltage-dependent anion-selective channel protein 2	VDAC2	PR	0.382512	0.000529525	0.00280638	na		-0.37129	0.10701	0.27904		0.046113	0.89934	0.99946		0.47666	0.16366	0.87144
Voltage-dependent anion-selective channel protein 3	Voltage-dependent anion-selective channel protein 3	VDAC3	PR	0.341671	2.72306e-05	0.000369199	na		-0.44204	0.051	0.26544		-0.13861	0.70255	0.99946		0.318	0.37056	0.89482
Villin-1	Villin-1	VIL1	PR	0.318126	0.000853539	0.00288962	na		-0.42504	0.061742	0.26544		-0.18121	0.61637	0.99946		0.3969	0.25611	0.87144
Vacuolar protein-sorting-associated protein 25	Vacuolar protein-sorting-associated protein 25	VPS25	PR	0.298573	5.84641e-05	0.000540983	na		-0.40943	0.073026	0.27224		-0.10535	0.77209	0.99322		0.15034	0.67846	0.93425
Vacuolar protein sorting-associated protein 26A	Vacuolar protein sorting-associated protein 26A	VPS26A	PR	0.330478	7.31691e-05	0.000582226	na		-0.42161	0.064096	0.26647		0.02271	0.95035	0.99861		0.087954	0.80908	0.96166
Vacuolar protein sorting-associated protein 28 homolog	Vacuolar protein sorting-associated protein 28 homolog	VPS28	PR	0.353891	0.00147613	0.00445451	na		-0.40874	0.073561	0.27224		-0.16154	0.65571	0.99322		0.16882	0.64105	0.93425
Vacuolar protein sorting-associated protein 29	Vacuolar protein sorting-associated protein 29	VPS29	PR	0.364161	1.18453e-05	0.000258744	na		-0.43968	0.052402	0.25968		-0.085301	0.81476	0.99861		0.46334	0.17744	0.90718
Vacuolar protein sorting-associated protein 35	Vacuolar protein sorting-associated protein 35	VPS35	PR	0.281508	0.00190356	0.00548107	na		-0.3817	0.096778	0.27098		0.11379	0.75427	0.99946		0.011115	0.97569	0.99645
Vacuolar protein sorting-associated protein 4B	Vacuolar protein sorting-associated protein 4B	VPS4B	PR	0.401382	1.13592e-05	0.000257938	na		-0.2872	0.21954	0.38182		0.25806	0.47161	0.99861		-0.33779	0.33978	0.90718
Visinin-like protein 1	Visinin-like protein 1	VSNL1	PR	0.000974256	0.000110671	0.00187244	0.06		-0.42892	0.05915	0.26019		0.04212	0.90803	0.99322		0.47178	0.16864	0.93425
von Willebrand factor A domain-containing protein 5A	von Willebrand factor A domain-containing protein 5A	VWA5A	PR	0.252401	0.00012408	0.000808464	na		-0.29596	0.20517	0.42464		0.10347	0.77608	0.99322		0.17322	0.63225	0.93425
Tryptophan--tRNA ligase, cytoplasmic	Tryptophan--tRNA ligase, cytoplasmic	WARS1	PR	0.389623	0.00220222	0.00582462	na		-0.24611	0.29559	0.43171		0.19029	0.5985	0.99946		0.38197	0.27605	0.87144
WASH complex subunit 2A	WASH complex subunit 2A	WASHC2A	PR	0.00122643	0.000756497	0.00282438	0.26		-0.34344	0.13819	0.35153		0.33034	0.3512	0.99322		-0.13645	0.70702	0.93425
WD repeat and FYVE domain-containing protein 1	WD repeat and FYVE domain-containing protein 1	WDFY1	PR	0.346512	0.000698433	0.00249135	na		-0.39658	0.083422	0.28842		-0.074545	0.83784	0.99322		0.34381	0.33069	0.93425
WD repeat-containing protein 3	WD repeat-containing protein 3	WDR3	PR	0.00292413	0.00632814	0.0135853	na		-0.40688	0.075004	0.2748		-0.36184	0.30422	0.99322		0.12932	0.72179	0.93425
WD repeat-containing protein 43	WD repeat-containing protein 43	WDR43	PR	0.00107249	0.000420701	0.00215423	0.2		-0.30273	0.19451	0.41868		0.33034	0.3512	0.99322		0.58023	0.078664	0.93425
Methylosome protein 50	Methylosome protein 50	WDR77	PR	0.235292	0.000590201	0.00220379	na		-0.38939	0.089698	0.29868		0.014097	0.96917	0.99591		-0.21616	0.54863	0.93425
Exportin-1	Exportin-1	XPO1	PR	0.354848	0.000257642	0.00126873	na		-0.40735	0.074641	0.26544		-0.047841	0.89559	0.99946		0.3798	0.27902	0.87144
Exportin-5	Exportin-5	XPO5	PR	0.168463	0.00359789	0.0085969	na		-0.39031	0.088873	0.27796		-0.12669	0.72728	0.99861		0.38438	0.27277	0.90718
X-ray repair cross-complementing protein 5	X-ray repair cross-complementing protein 5	XRCC5	PR	0.28217	9.66361e-05	0.0013563	na		-0.34766	0.1331	0.29856		0.21619	0.54858	0.99946		0.45781	0.18336	0.87144
X-ray repair cross-complementing protein 6	X-ray repair cross-complementing protein 6	XRCC6	PR	0.316126	3.55691e-05	0.000964656	na		-0.42221	0.063678	0.26544		0.0057502	0.98742	0.99946		0.44408	0.19854	0.87144
5'-3' exoribonuclease 2	5'-3' exoribonuclease 2	XRN2	PR	0.313921	0.00106323	0.00339887	na		-0.31231	0.18006	0.35066		0.061889	0.86513	0.99861		0.38768	0.26833	0.90718
Tyrosine--tRNA ligase, cytoplasmic	Tyrosine--tRNA ligase, cytoplasmic	YARS1	PR	0.301766	0.00102301	0.00331844	na		-0.37118	0.10713	0.27904		0.02759	0.93969	0.99946		0.49183	0.14877	0.87144
Nuclease-sensitive element-binding protein 1	Nuclease-sensitive element-binding protein 1	YBX1	PR	0.261016	0.000152008	0.000911069	na		-0.37425	0.10403	0.27904		0.071015	0.84543	0.99946		0.36152	0.30468	0.87144
Tyrosine-protein kinase Yes	Tyrosine-protein kinase Yes	YES1	PR	0.163418	0.0142285	0.0259739	na		-0.14674	0.53699	0.66196		0.18723	0.60449	0.99861		0.43834	0.2051	0.90718
14-3-3 protein beta/alpha	14-3-3 protein beta/alpha	YWHAB	PR	0.412402	0.000327851	0.00146946	na		-0.3356	0.14802	0.31112		0.20219	0.57534	0.99946		0.30472	0.39195	0.89588
14-3-3 protein epsilon	14-3-3 protein epsilon	YWHAE	PR	0.477931	1.33275e-05	0.000271707	na		-0.37712	0.10119	0.27676		0.17445	0.62978	0.99946		0.20386	0.57214	0.91266
14-3-3 protein gamma	14-3-3 protein gamma	YWHAG	PR	0.459012	0.00126112	0.00389635	na		-0.43692	0.054073	0.26544		-0.30134	0.39749	0.99946		0.55647	0.094789	0.87144
14-3-3 protein zeta/delta	14-3-3 protein zeta/delta	YWHAZ	PR	0.440362	7.35772e-05	0.00058381	na		-0.32369	0.16386	0.32442		0.33109	0.35004	0.99946		0.50868	0.13324	0.87144
Zinc finger CCCH-type antiviral protein 1	Zinc finger CCCH-type antiviral protein 1	ZC3HAV1	PR	0.464021	0.0045682	0.0108495	na		-0.20492	0.38612	0.58099		0.21295	0.55474	0.99322		0.10854	0.76534	0.93425
Zinc finger RNA-binding protein	Zinc finger RNA-binding protein	ZFR	PR	0.000805015	0.00100548	0.00333564	na		-0.23394	0.32085	0.52124		0.48647	0.15394	0.99322		-0.19832	0.58283	0.93425
CAAX prenyl protease 1 homolog	CAAX prenyl protease 1 homolog	ZMPSTE24	PR	0.321814	0.000192407	0.00104755	na		-0.40879	0.07352	0.27764		-0.13639	0.70714	0.99861		0.49811	0.14287	0.90718
BUB3-interacting and GLEBS motif-containing protein ZNF207	BUB3-interacting and GLEBS motif-containing protein ZNF207	ZNF207	PR	0.162792	0.00142083	0.00512697	na		-0.27252	0.24506	0.46301		0.35233	0.31804	0.99322		0.28412	0.42627	0.93425
Zinc finger Ran-binding domain-containing protein 2	Zinc finger Ran-binding domain-containing protein 2	ZRANB2	PR	0.199222	3.93033e-05	0.000423838	na		-0.30532	0.19052	0.41347		0.12501	0.73077	0.99322		0.26472	0.45983	0.93425
Extracellular superoxide dismutase [Cu-Zn]	Extracellular superoxide dismutase [Cu-Zn]	SOD3	GR	2.11651	0.00836236	0.0176806	na	pos	0.53698	0.014632	0.26544	pos	0.72886	0.016788	0.99946	neg	-0.64694	0.043203	0.87144
Caveolae-associated protein 1	Caveolae-associated protein 1	CAVIN1	GR	1.71512	0.00528198	0.012253	na	pos	0.4553	0.04367	0.26544		0.42201	0.22444	0.99946	neg	-0.65726	0.038915	0.87144
Zinc-alpha-2-glycoprotein	Zinc-alpha-2-glycoprotein	AZGP1	GR	1.62804	0.0256527	0.0443462	na		0.34986	0.1305	0.29592		0.26248	0.46378	0.99946	neg	-0.68108	0.030134	0.87144
Alpha-crystallin B chain	Alpha-crystallin B chain	CRYAB	GR	2.09975	0.0198546	0.0359623	na		0.30635	0.18896	0.34343		0.22335	0.53507	0.99946	neg	-0.64975	0.042005	0.87144
Ubiquitin carboxyl-terminal hydrolase isozyme L1	Ubiquitin carboxyl-terminal hydrolase isozyme L1	UCHL1	GR	2.39034	0.00579536	0.0125088	na		0.16226	0.4943	0.62258		-0.21705	0.54694	0.99861	neg	-0.72509	0.017653	0.90718
Chondroitin sulfate proteoglycan 4	Chondroitin sulfate proteoglycan 4	CSPG4	GR	4.03974	0.0130287	0.0252002	na		-0.023047	0.92317	0.96482	neg	-0.67228	0.033203	0.99322		0.25105	0.48416	0.93425
Neutrophil elastase	Neutrophil elastase	ELANE	GR	2.3093	0.00207897	0.00587115	na		0.015825	0.94721	0.96393	neg	-0.86706	0.0011602	0.38797		0.25302	0.4806	0.90225
Hemoglobin subunit epsilon	Hemoglobin subunit epsilon	HBE1	GR	2.36569	0.025075	0.0436352	na		-0.12261	0.60657	0.69525	neg	-0.71168	0.020977	0.99946		-0.12128	0.73856	0.95671
HLA class I histocompatibility antigen, B-44 alpha chain	HLA class I histocompatibility antigen, B-7 alpha chain	HLA-B	GR	716.702	0.026531	0.0438988	0.26		-0.11282	0.6358	0.72284	neg	-0.76215	0.010388	0.99946		0.46199	0.17887	0.87144
Ras-related protein Rab-23	Ras-related protein Rab-23	RAB23	GR	2.39471	0.00163618	0.00481849	na	pos	0.511	0.021302	0.24371	pos	0.68106	0.03014	0.99861		-0.043343	0.90537	0.98874
Alpha-actinin-1	Alpha-actinin-1	ACTN1	GR	2.18466	0.000334281	0.0014867	na	pos	0.45219	0.045314	0.26544		0.2158	0.54931	0.99946		-0.29059	0.41534	0.90222
Alpha-2-HS-glycoprotein	Alpha-2-HS-glycoprotein	AHSG	GR	1.80554	0.00480387	0.0113321	na	pos	0.50174	0.024194	0.26544		0.4411	0.20193	0.99946		-0.28009	0.43314	0.90222
Apolipoprotein A-I	Apolipoprotein A-I	APOA1	GR	1.69253	0.00522981	0.0121521	na	pos	0.45813	0.042215	0.26544		0.43784	0.20567	0.99946		-0.40939	0.24006	0.87144
Apolipoprotein A-II	Apolipoprotein A-II	APOA2	GR	1.77	0.000538869	0.00205609	na	pos	0.50811	0.022173	0.26544		0.41286	0.23571	0.99946		-0.36068	0.30589	0.87144
Apolipoprotein C-III	Apolipoprotein C-III	APOC3	GR	2.17497	0.00802291	0.0171577	0.04	pos	0.52962	0.016322	0.23642		0.40038	0.25157	0.99861		-0.060287	0.8686	0.98232
Plasma membrane calcium-transporting ATPase 4	Plasma membrane calcium-transporting ATPase 4	ATP2B4	GR	2.12897	0.00364011	0.00902796	na	pos	0.51281	0.02077	0.26544		0.46353	0.17724	0.99946		-0.15658	0.66576	0.93575
Caldesmon	Caldesmon	CALD1	GR	2.18289	0.000912779	0.00304223	na	pos	0.45288	0.044943	0.26544		0.33063	0.35076	0.99946		-0.33398	0.34561	0.87566
Coronin-1C	Coronin-1C	CORO1C	GR	1.8016	0.00375303	0.0092763	na	pos	0.47909	0.032579	0.26544		0.31221	0.37982	0.99946		-0.095591	0.79279	0.96212
Desmin	Desmin	DES	GR	4.1047	0.00120651	0.00375674	na	pos	0.45008	0.046453	0.26544		0.42983	0.21506	0.99946		-0.38012	0.27858	0.87144
EH domain-containing protein 2	EH domain-containing protein 2	EHD2	GR	1.69826	0.0122261	0.0240137	na	pos	0.45275	0.045013	0.26544		0.47307	0.16731	0.99946		-0.60145	0.065857	0.87144
Fermitin family homolog 2	Fermitin family homolog 2	FERMT2	GR	1.76729	0.00827304	0.0175582	na	pos	0.60693	0.0045446	0.26544		0.53009	0.11501	0.99946		0.067533	0.85294	0.97575
Gelsolin	Gelsolin	GSN	GR	1.58771	0.000788392	0.0027286	na	pos	0.5589	0.010416	0.26544		0.43898	0.20436	0.99946		-0.53512	0.11096	0.87144
Heat shock protein beta-7	Heat shock protein beta-7	HSPB7	GR	4.19698	0.00800355	0.0171294	na	pos	0.50787	0.022248	0.24371		0.28689	0.42159	0.99861		0.072412	0.84243	0.97772
Immunoglobulin heavy constant gamma 3	Immunoglobulin heavy constant gamma 3	IGHG3	GR	1.83398	0.00924403	0.0190966	na	pos	0.4724	0.035444	0.26544		0.31283	0.37881	0.99946		0.01742	0.96191	0.99428
Immunoglobulin heavy variable 3-49	Immunoglobulin heavy variable 3-49	IGHV3-49	GR	1164.02	0.000902676	0.00330429	0.08	pos	0.48745	0.029254	0.2211		0.018298	0.95999	0.99479		0.59018	0.072478	0.93425
Immunoglobulin kappa variable 1D-39	Immunoglobulin kappa variable 1D-39	IGKV1D-39	GR	2.17083	0.00908243	0.0179029	0.04	pos	0.45746	0.042559	0.25603		0.50194	0.13933	0.99861		-0.0023025	0.99496	0.9975
Alpha-internexin	Alpha-internexin	INA	GR	only in A	0.00032348	0.0564675	na	pos	0.61491	0.0039095	0.20263		0.38532	0.27151	0.99861		na	na	na
Prelamin-A/C	Prelamin-A/C	LMNA	GR	1.32942	0.0265381	0.0456129	na	pos	0.46108	0.040738	0.26544		0.55011	0.099437	0.99946		-0.1134	0.7551	0.95878
Leiomodin-1	Leiomodin-1	LMOD1	GR	2.80539	0.00738948	0.0159743	na	pos	0.47116	0.035996	0.26544		0.50466	0.13686	0.99946		-0.53014	0.11496	0.87144
Lipoma-preferred partner	Lipoma-preferred partner	LPP	GR	2.08641	0.000802589	0.00276063	na	pos	0.46013	0.041211	0.26544		0.43408	0.21005	0.99946		-0.57741	0.080477	0.87144
Protein MRVI1	Protein MRVI1	MRVI1	GR	1092.83	0.00102874	0.00339629	na	pos	0.50275	0.023863	0.2211		0.33789	0.33963	0.99322		-0.20842	0.56338	0.93425
Myosin light polypeptide 6	Myosin light polypeptide 6	MYL6	GR	2.0917	0.00448685	0.0107018	na	pos	0.51404	0.020417	0.26544		0.3845	0.27262	0.99946		-0.20245	0.57485	0.91266
Myosin regulatory light polypeptide 9	Myosin regulatory light polypeptide 9	MYL9	GR	2.21109	0.0101748	0.0206229	na	pos	0.44783	0.047693	0.26544		0.32448	0.36033	0.99946		-0.2764	0.43949	0.90222
Myosin light chain kinase, smooth muscle	Myosin light chain kinase, smooth muscle	MYLK	GR	2.87667	0.00466326	0.0110471	na	pos	0.46722	0.037797	0.26544		0.38336	0.27416	0.99946		-0.38122	0.27707	0.87144
Neuronal growth regulator 1	Neuronal growth regulator 1	NEGR1	GR	799.624	0.0040687	0.00966317	na	pos	0.50289	0.023819	0.2211		0.49806	0.14291	0.99322		-0.23234	0.51831	0.93425
Protein Niban	Protein Niban	NIBAN1	GR	2.0554	0.00611148	0.0138102	na	pos	0.48353	0.030779	0.24542		0.31703	0.37209	0.99861		0.25806	0.4716	0.90718
Nidogen-2	Nidogen-2	NID2	GR	4.47807	0.000121324	0.000799191	na	pos	0.45119	0.045847	0.25603		0.2064	0.56726	0.99861		-0.13585	0.70826	0.95684
Palladin	Palladin	PALLD	GR	2.74207	0.000308484	0.0014171	na	pos	0.46114	0.04071	0.26544		0.28583	0.42338	0.99946		-0.12962	0.72117	0.95237
Protein PBDC1	Protein PBDC1	PBDC1	GR	4.25642	0.0292013	0.0482028	0.9	pos	0.47901	0.032613	0.2211		0.3971	0.25584	0.99322		-0.10549	0.7718	0.93425
PDZ and LIM domain protein 7	PDZ and LIM domain protein 7	PDLIM7	GR	2.96465	0.00184825	0.00534387	na	pos	0.45278	0.044999	0.26544		0.30745	0.3875	0.99946		-0.31742	0.37147	0.89482
Phosphoglucomutase-like protein 5	Phosphoglucomutase-like protein 5	PGM5	GR	3.06865	0.0020633	0.00583279	na	pos	0.47096	0.036088	0.26544		0.34612	0.32723	0.99946		-0.41742	0.23005	0.87144
Plectin	Plectin	PLEC	GR	1.5209	0.00332699	0.00838655	na	pos	0.64987	0.0019253	0.26544		0.53538	0.11075	0.99946		0.35901	0.3083	0.87144
Perilipin-4	Perilipin-4	PLIN4	GR	3.26395	0.00682835	0.0150526	0.04	pos	0.59558	0.0055923	0.20263		0.49767	0.14327	0.99861		0.1228	0.7354	0.95944
Protein phosphatase 1 regulatory subunit 12C	Protein phosphatase 1 regulatory subunit 12C	PPP1R12C	GR	3.79453	0.00678458	0.0149916	na	pos	0.48019	0.032124	0.2211		0.31771	0.37101	0.99322		0.31017	0.3831	0.93425
Prostaglandin G/H synthase 1	Prostaglandin G/H synthase 1	PTGS1	GR	3.4505	0.000273296	0.00131154	na	pos	0.47782	0.033108	0.24542		0.29242	0.41228	0.99861		0.2187	0.54383	0.90718
Ras-related protein R-Ras	Ras-related protein R-Ras	RRAS	GR	1.78837	0.00594116	0.0135018	na	pos	0.48187	0.031441	0.26544		0.58673	0.074586	0.99946		-0.2689	0.4525	0.90225
Ras suppressor protein 1	Ras suppressor protein 1	RSU1	GR	1.6025	0.0050652	0.0118447	na	pos	0.53326	0.015468	0.26544		0.38152	0.27666	0.99946		0.11027	0.7617	0.95878
GTP-binding protein SAR1b	GTP-binding protein SAR1b	SAR1B	GR	2.71454	9.26578e-05	0.000686454	na	pos	0.46385	0.039392	0.24542		0.12967	0.72106	0.99861		0.058142	0.87324	0.98506
Septin-6	Septin-6	SEPTIN6	GR	1.73837	0.0257481	0.0426792	na	pos	0.52864	0.016559	0.26544		0.43995	0.20325	0.99946		0.28323	0.4278	0.90222
Heparin cofactor 2	Heparin cofactor 2	SERPIND1	GR	1.29041	0.0172575	0.0304678	na	pos	0.4466	0.048381	0.26544		0.27007	0.45046	0.99946		-0.0051818	0.98867	0.9972
Sarcolemmal membrane-associated protein	Sarcolemmal membrane-associated protein	SLMAP	GR	2.33997	0.00507724	0.0118568	na	pos	0.45541	0.043612	0.26544		0.40508	0.24553	0.99946		-0.28896	0.41808	0.90222
Sorbin and SH3 domain-containing protein 1	Sorbin and SH3 domain-containing protein 1	SORBS1	GR	2.55245	0.00302213	0.00778738	na	pos	0.47476	0.034414	0.26544		0.38918	0.26632	0.99946		-0.46623	0.17439	0.87144
Supervillin	Supervillin	SVIL	GR	6.2861	4.33733e-08	4.03806e-05	na	pos	0.50837	0.022096	0.24371		0.050235	0.89039	0.99861		-0.016341	0.96426	0.9975
Synemin	Synemin	SYNM	GR	4.80855	0.00220222	0.00582462	na	pos	0.56435	0.0095392	0.26544		0.45711	0.18412	0.99946		-0.0091815	0.97992	0.99645
Synaptopodin-2	Synaptopodin-2	SYNPO2	GR	4.65205	0.00282727	0.00705051	na	pos	0.47174	0.035739	0.26544		0.29333	0.41076	0.99946		-0.24153	0.50141	0.90228
Transcription elongation factor A protein-like 3	Transcription elongation factor A protein-like 3	TCEAL3	GR	2.59157	1.16181e-05	0.000258744	na	pos	0.46262	0.039985	0.2471		0.28731	0.42087	0.99861		-0.30028	0.39923	0.90718
Talin-1	Talin-1	TLN1	GR	1.46351	0.00391637	0.00957944	na	pos	0.46324	0.039687	0.26544		0.45279	0.18883	0.99946		-0.30854	0.38573	0.89588
Tensin-1	Tensin-1	TNS1	GR	2.14877	0.000766064	0.00266785	na	pos	0.51908	0.019012	0.26544		0.44207	0.20082	0.99946		-0.24402	0.49687	0.90225
Tropomyosin beta chain	Tropomyosin beta chain	TPM2	GR	2.87916	0.000277386	0.00131758	na	pos	0.4531	0.044828	0.26544		0.30809	0.38646	0.99946		-0.41846	0.22877	0.87144
Tubulin beta-2A chain	Tubulin beta-2A chain	TUBB2A	GR	3.05246	1.20043e-06	0.000133306	na	pos	0.53209	0.015739	0.26544		0.22567	0.53073	0.99946		-0.054908	0.88025	0.97634
von Willebrand factor A domain-containing protein 1	von Willebrand factor A domain-containing protein 1	VWA1	GR	3.56087	2.33767e-06	0.000163228	na	pos	0.49993	0.024791	0.24371		0.48119	0.15912	0.99861		0.21533	0.55021	0.90718
Actin, alpha skeletal muscle	Actin, alpha skeletal muscle	ACTA1	GR	2.07507	0.00706621	0.0154549	na		0.33628	0.14715	0.31087		0.24687	0.49169	0.99946		-0.4852	0.15517	0.87144
Actin, cytoplasmic 2	Actin, cytoplasmic 2	ACTG1	GR	1.23449	0.00884683	0.0184811	na		0.34503	0.13626	0.3009		0.072933	0.8413	0.99946		0.026554	0.94195	0.99428
Actin, gamma-enteric smooth muscle	Actin, gamma-enteric smooth muscle	ACTG2	GR	2.30072	0.00502044	0.0117635	na		0.32447	0.1628	0.32378		0.14113	0.69735	0.99946		-0.37626	0.28389	0.87144
Pancreatic alpha-amylase	Pancreatic alpha-amylase	AMY2A	GR	3.74341	0.0204705	0.0367443	na		0.30689	0.18813	0.41057		0.013188	0.97116	0.99591		-0.062022	0.86485	0.9493
Membrane primary amine oxidase	Membrane primary amine oxidase	AOC3	GR	1.98397	0.00886311	0.0185013	na		0.37123	0.10707	0.27904		0.36358	0.30172	0.99946		-0.56428	0.089278	0.87144
BAG family molecular chaperone regulator 2	BAG family molecular chaperone regulator 2	BAG2	GR	3.94554	0.00709583	0.0154954	na		0.30127	0.19677	0.36332		-0.016265	0.96443	0.99861		-0.0023552	0.99485	0.9975
BAG family molecular chaperone regulator 3	BAG family molecular chaperone regulator 3	BAG3	GR	2.45446	0.00682199	0.0150504	na		0.27663	0.23772	0.45959		-0.16495	0.64883	0.99322		0.25687	0.47373	0.93425
Biglycan	Biglycan	BGN	GR	2.25212	0.0109462	0.0218533	na		0.14386	0.5451	0.64673		-0.32918	0.35301	0.99946		-0.30341	0.39408	0.89588
Complement C1q subcomponent subunit C	Complement C1q subcomponent subunit C	C1QC	GR	1.88604	0.00591899	0.0134623	na		0.13806	0.56162	0.68055		-0.21881	0.54361	0.99861		-0.43127	0.21335	0.90718
Complement C4-B	Complement C4-B	C4B_2	GR	1.53305	0.0255642	0.0442659	na		0.2257	0.33868	0.4642		-0.056982	0.87576	0.99946		-0.2165	0.54798	0.91189
Complement C5	Complement C5	C5	GR	2.31064	0.0118596	0.0234588	na		0.26386	0.26096	0.40659		-0.028167	0.93843	0.99946		-0.46061	0.18035	0.87144
Complement component C7	Complement component C7	C7	GR	2.14675	0.00114856	0.0036044	na		0.34384	0.1377	0.35153		0.018326	0.95993	0.99479		-0.1587	0.66145	0.93425
Complement component C8 alpha chain	Complement component C8 alpha chain	C8A	GR	2.30529	0.0184598	0.0337865	na		0.152	0.52236	0.64997		-0.21223	0.5561	0.99861		-0.53413	0.11174	0.90718
Complement component C8 gamma chain	Complement component C8 gamma chain	C8G	GR	3.22647	0.00458639	0.0104738	na		0.11254	0.63665	0.7368		-0.55365	0.096834	0.99861		-0.14555	0.68827	0.94918
Voltage-dependent calcium channel subunit alpha-2/delta-1	Voltage-dependent calcium channel subunit alpha-2/delta-1	CACNA2D1	GR	2.05566	0.0105239	0.0211919	na		0.35815	0.12102	0.33721		0.43654	0.20719	0.99322		0.01038	0.9773	0.98954
Caveolin-1	Caveolin-1	CAV1	GR	2.06641	0.0205324	0.0368318	na		0.22933	0.33075	0.45761		0.02148	0.95303	0.99946		-0.48265	0.15769	0.87144
CD44 antigen	CD44 antigen	CD44	GR	3.15831	7.20973e-05	0.000581611	na		0.40648	0.075319	0.26544		0.095341	0.79333	0.99946		-0.26449	0.46022	0.90225
CD5 antigen-like	CD5 antigen-like	CD5L	GR	2.45527	0.00334608	0.00842706	na		-0.085104	0.72129	0.84838		-0.30922	0.38464	0.99322		-0.3185	0.36975	0.93425
Complement factor D	Complement factor D	CFD	GR	2.04134	0.0202636	0.0364901	na		0.33238	0.1522	0.37227		0.42379	0.22228	0.99322		-0.19743	0.58457	0.93425
Complement factor H	Complement factor H	CFH	GR	1.72537	0.0131697	0.0254416	na		0.15332	0.51869	0.62761		-0.20928	0.56172	0.99946		-0.51219	0.13014	0.87144
Complement factor H-related protein 5	Complement factor H-related protein 5	CFHR5	GR	6.56246	0.0295786	0.048768	na		-0.092771	0.69727	0.82781		-0.51861	0.12458	0.99322		-0.40511	0.2455	0.93425
Complement factor I	Complement factor I	CFI	GR	1.9864	0.0145968	0.0278666	na		0.27476	0.24104	0.4038		0.026442	0.9422	0.99861		-0.34992	0.32159	0.90718
Tetranectin	Tetranectin	CLEC3B	GR	1.94056	0.0256648	0.0443462	na		0.18023	0.44703	0.58208		-0.19989	0.5798	0.99861		-0.30637	0.38926	0.90718
Chloride intracellular channel protein 4	Chloride intracellular channel protein 4	CLIC4	GR	1.48092	0.027239	0.0466453	na		0.049434	0.83604	0.87161		-0.41968	0.22728	0.99946		-0.21356	0.55356	0.91189
Calponin-1	Calponin-1	CNN1	GR	2.57781	0.0198838	0.0359686	na		0.36505	0.11351	0.28231		0.33227	0.34823	0.99946		-0.47061	0.16984	0.87144
Collagen alpha-1(XIV) chain	Collagen alpha-1(XIV) chain	COL14A1	GR	2.03402	0.00269023	0.00715602	na		0.35225	0.12772	0.29592		0.23907	0.50591	0.99946		-0.35988	0.30705	0.87144
Collagen alpha-1(XV) chain	Collagen alpha-1(XV) chain	COL15A1	GR	2.21781	0.000530852	0.00203128	na		0.25704	0.27395	0.41516		-0.25769	0.47227	0.99946		-0.20027	0.57906	0.91645
Collagen alpha-1(III) chain	Collagen alpha-1(III) chain	COL3A1	GR	3.57524	0.0184967	0.0338318	na		0.24202	0.30394	0.46038		-0.035698	0.92201	0.99861		0.049264	0.8925	0.98776
Collagen alpha-3(VI) chain	Collagen alpha-3(VI) chain	COL6A3	GR	2.33336	0.00341202	0.00855456	na		0.19967	0.39867	0.51611		-0.33477	0.34439	0.99946		0.085986	0.81329	0.96763
Cartilage-associated protein	Cartilage-associated protein	CRTAP	GR	2.68737	0.00963921	0.0197668	na		0.032387	0.89218	0.93983		-0.23306	0.51699	0.99861		-0.064148	0.86025	0.98232
Cysteine and glycine-rich protein 1	Cysteine and glycine-rich protein 1	CSRP1	GR	2.96016	0.00320495	0.00815992	na		0.4327	0.056708	0.26544		0.36855	0.29467	0.99946		-0.43024	0.21457	0.87144
Drebrin	Drebrin	DBN1	GR	2.30805	0.0279758	0.047504	na		0.29433	0.2078	0.37043		0.039414	0.91392	0.99861		-0.42045	0.22634	0.90718
Decorin	Decorin	DCN	GR	2.63504	0.000467994	0.00186463	na		0.23929	0.30959	0.44199		-0.19266	0.59386	0.99946		-0.53014	0.11496	0.87144
Dystrophin	Dystrophin	DMD	GR	1.35689	0.0251378	0.0437172	na		0.38545	0.093272	0.2821		0.22813	0.52613	0.99861		0.26196	0.4647	0.90718
Dihydropyrimidinase-related protein 3	Dihydropyrimidinase-related protein 3	DPYSL3	GR	1.46354	0.0103293	0.0208724	na		0.2583	0.27153	0.41384		0.058043	0.87346	0.99946		-0.38454	0.27256	0.87144
EMILIN-1	EMILIN-1	EMILIN1	GR	1.69197	0.0102476	0.0207402	na		0.27106	0.2477	0.40529		-0.22726	0.52776	0.99861		0.46508	0.1756	0.90718
Protein enabled homolog	Protein enabled homolog	ENAH	GR	1.69567	0.00346706	0.00864597	0.08		0.29464	0.2073	0.37043		-0.17598	0.62674	0.99861		0.12523	0.73032	0.95823
Band 4.1-like protein 3	Band 4.1-like protein 3	EPB41L3	GR	2.09841	0.0131722	0.0254416	na		0.21221	0.36907	0.52074		-0.057809	0.87396	0.99861		-0.28635	0.42249	0.90718
Protein NOXP20	Protein NOXP20	FAM114A1	GR	2.19911	0.0146793	0.0279858	na		0.23091	0.32734	0.47937		0.089269	0.80627	0.99861		-0.39467	0.25903	0.90718
Fibulin-1	Fibulin-1	FBLN1	GR	2.16123	0.00941236	0.0193584	na		0.21865	0.35438	0.47444		-0.14099	0.69764	0.99946		-0.42514	0.22065	0.87144
Four and a half LIM domains protein 1	Four and a half LIM domains protein 1	FHL1	GR	2.73479	0.0176637	0.0326937	na		0.30552	0.19021	0.34393		0.20644	0.56717	0.99946		-0.57768	0.080304	0.87144
Filamin-A	Filamin-A	FLNA	GR	2.50292	0.00325139	0.00824787	na		0.44273	0.0506	0.26544		0.32486	0.35973	0.99946		-0.46426	0.17647	0.87144
Filamin-C	Filamin-C	FLNC	GR	3.08786	0.00731144	0.0158301	na		0.41353	0.069923	0.26544		0.17627	0.62616	0.99946		-0.20477	0.57039	0.91266
Fibronectin	Fibronectin	FN1	GR	3.08107	0.0071878	0.0156351	na		0.15454	0.51533	0.6259		-0.44072	0.20236	0.99946		-0.27046	0.44979	0.90222
Vitamin D-binding protein	Vitamin D-binding protein	GC	GR	1.69092	0.0125057	0.0244426	na		0.34235	0.13953	0.30454		0.18284	0.61315	0.99946		-0.39333	0.2608	0.87144
Golgi-associated plant pathogenesis-related protein 1	Golgi-associated plant pathogenesis-related protein 1	GLIPR2	GR	1.59511	0.0277028	0.0472081	na		0.27221	0.24561	0.40529		0.032254	0.92952	0.99861		0.25572	0.47578	0.90718
Histone H1.4	Histone H1.4	H1-4	GR	4.62404	0.0257481	0.0426792	na		-0.29413	0.20812	0.36022		0.10989	0.76251	0.99946		0.49974	0.14135	0.87144
Histidine-rich glycoprotein	Histidine-rich glycoprotein	HRG	GR	1.65459	0.00766389	0.0164529	na		0.32187	0.16639	0.32612		0.1204	0.74042	0.99946		-0.25037	0.48538	0.90225
Heat shock protein beta-6	Heat shock protein beta-6	HSPB6	GR	3.67871	0.00668913	0.0148748	na		0.40329	0.077866	0.26544		0.27317	0.44506	0.99946		-0.57539	0.081793	0.87144
Heat shock protein beta-8	Heat shock protein beta-8	HSPB8	GR	1.94808	0.00731771	0.0158314	na		0.24952	0.28872	0.49348		0.019949	0.95638	0.99479		0.095423	0.79315	0.93425
Basement membrane-specific heparan sulfate proteoglycan core protein	Basement membrane-specific heparan sulfate proteoglycan core protein	HSPG2	GR	1.75819	0.00289752	0.00759171	na		0.31916	0.17019	0.32908		-0.14887	0.68147	0.99946		0.23277	0.51752	0.90813
Immunoglobulin heavy constant gamma 2	Immunoglobulin heavy constant gamma 2	IGHG2	GR	1.80076	0.00672269	0.0149138	na		0.24924	0.28928	0.42751		-0.008028	0.98244	0.99946		-0.20956	0.5612	0.91266
Immunoglobulin heavy constant gamma 4	Immunoglobulin heavy constant gamma 4	IGHG4	GR	2.71641	0.0151879	0.0288179	na		0.13705	0.5645	0.66288		-0.25079	0.48461	0.99946		0.16002	0.65878	0.93395
Immunoglobulin heavy constant mu	Immunoglobulin heavy constant mu	IGHM	GR	1.80129	0.0121032	0.0238393	na		0.11528	0.6284	0.71691		-0.17178	0.63513	0.99946		-0.61807	0.056846	0.87144
Immunoglobulin kappa constant	Immunoglobulin kappa constant	IGKC	GR	2.68142	3.40369e-05	0.000395493	na		0.42043	0.064925	0.26544		0.15573	0.66748	0.99946		-0.39871	0.25374	0.87144
Immunoglobulin kappa variable 4-1	Immunoglobulin kappa variable 4-1	IGKV4-1	GR	2.02147	0.00755972	0.0162919	na		0.42315	0.06303	0.26647		0.1717	0.63529	0.99861		0.3497	0.32191	0.90718
Immunoglobulin lambda constant 2	Immunoglobulin lambda constant 2	IGLC2	GR	1.6351	0.0186331	0.0340479	na		0.096992	0.68416	0.7569		-0.33481	0.34432	0.99946		-0.044614	0.9026	0.97865
Integrin-linked protein kinase	Integrin-linked protein kinase	ILK	GR	1.52059	0.0118968	0.023484	na		0.26213	0.26422	0.40906		-0.048765	0.89358	0.99946		-0.03774	0.91756	0.9853
Immunoglobulin gamma-1 heavy chain	Immunoglobulin gamma-1 heavy chain	Immunoglobulin gamma-1 heavy chain	GR	1.63013	0.0268646	0.046105	na		0.26559	0.25773	0.40413		0.067901	0.85215	0.99946		-0.13849	0.70279	0.94821
Immunoglobulin kappa light chain	Immunoglobulin kappa light chain	Immunoglobulin kappa light chain	GR	1.60233	0.00585857	0.0133358	na		0.33417	0.14986	0.3114		-0.061592	0.86578	0.99946		-0.16809	0.64252	0.92453
Integrin alpha-5	Integrin alpha-5	ITGA5	GR	2.91984	0.000192368	0.00104755	na		0.42529	0.061571	0.26544		0.18855	0.60189	0.99946		-0.43537	0.20854	0.87144
Integrin alpha-7	Integrin alpha-7	ITGA7	GR	3.17445	0.00195002	0.0055918	na		0.37498	0.1033	0.3204		0.33727	0.34057	0.99322		-0.58357	0.076548	0.93425
Integrin beta-1	Integrin beta-1	ITGB1	GR	1.31673	0.0201935	0.0364109	na		0.31442	0.17697	0.33423		0.11281	0.75635	0.99946		-0.13216	0.7159	0.95237
Inter-alpha-trypsin inhibitor heavy chain H1	Inter-alpha-trypsin inhibitor heavy chain H1	ITIH1	GR	1.92585	0.0106583	0.0214163	na		0.2004	0.39691	0.51563		-0.17532	0.62806	0.99946		-0.19399	0.59127	0.91645
Inter-alpha-trypsin inhibitor heavy chain H2	Inter-alpha-trypsin inhibitor heavy chain H2	ITIH2	GR	2.20814	0.00122072	0.00379675	na		0.30899	0.18497	0.3401		-0.029547	0.93542	0.99946		-0.23977	0.50463	0.90228
Inter-alpha-trypsin inhibitor heavy chain H3	Inter-alpha-trypsin inhibitor heavy chain H3	ITIH3	GR	2.12888	0.0211339	0.0359264	na		0.11671	0.62413	0.76988		-0.25524	0.47664	0.99322		-0.28259	0.42888	0.93425
Kininogen-1	Kininogen-1	KNG1	GR	1.80505	0.00995346	0.0202477	na		0.2614	0.26561	0.40941		-0.092294	0.79982	0.99946		-0.07891	0.82846	0.96763
Laminin subunit alpha-4	Laminin subunit alpha-4	LAMA4	GR	2.38717	3.49803e-05	0.000397154	na		0.43687	0.054105	0.26544		0.24171	0.50108	0.99946		0.16461	0.64951	0.92597
Laminin subunit beta-1	Laminin subunit beta-1	LAMB1	GR	2.83531	0.0091085	0.0179029	na		0.14117	0.55274	0.6542		-0.31409	0.3768	0.99946		-0.36129	0.30501	0.87144
Laminin subunit beta-2	Laminin subunit beta-2	LAMB2	GR	1.52981	0.0282486	0.0478461	na		0.37096	0.10735	0.27904		0.18777	0.60342	0.99946		0.24101	0.50237	0.90228
Laminin subunit gamma-1	Laminin subunit gamma-1	LAMC1	GR	1.79405	0.00266875	0.00710564	na		0.39022	0.088949	0.26742		0.16604	0.64663	0.99946		-0.0020047	0.99561	0.99797
Galectin-1	Galectin-1	LGALS1	GR	1.60592	5.09632e-05	0.000495959	na		0.40661	0.075218	0.26544		0.071715	0.84393	0.99946		-0.1534	0.67223	0.94055
LIM and senescent cell antigen-like-containing domain protein 2	LIM and senescent cell antigen-like-containing domain protein 2	LIMS2	GR	2.81988	0.0229495	0.0404052	na		0.2626	0.26334	0.42017		0.14111	0.69739	0.99861		-0.46919	0.17131	0.90718
Lumican	Lumican	LUM	GR	2.81734	1.29306e-05	0.000269515	na		0.35308	0.12676	0.29592		0.13571	0.70855	0.99946		-0.51957	0.12376	0.87144
Microtubule-associated protein 1A	Microtubule-associated protein 1A	MAP1A	GR	2.14489	0.00162821	0.00481227	0.16		0.42125	0.064353	0.26523		0.024447	0.94655	0.99479		0.57168	0.084247	0.93425
Microtubule-associated protein 1B	Microtubule-associated protein 1B	MAP1B	GR	2.77151	0.000641887	0.00235584	na		0.15223	0.52172	0.64997		-0.58405	0.076248	0.99861		-0.38001	0.27872	0.90718
Cell surface glycoprotein MUC18	Cell surface glycoprotein MUC18	MCAM	GR	1.87604	0.00728456	0.0149711	na		0.43019	0.058323	0.26544		0.31361	0.37756	0.99946		-0.17041	0.63787	0.92453
72 kDa type IV collagenase	72 kDa type IV collagenase	MMP2	GR	4.05055	0.00234998	0.00645859	na		0.020863	0.93043	0.96477		-0.32503	0.35947	0.99861		-0.12806	0.72442	0.95684
Mas-related G-protein coupled receptor member F	Mas-related G-protein coupled receptor member F	MRGPRF	GR	9.3309	0.00250758	0.00764593	na		0.35888	0.12021	0.33605		-0.027735	0.93938	0.99479		-0.12969	0.72104	0.93425
Moesin	Moesin	MSN	GR	1.24207	0.0227554	0.040149	na		0.2286	0.33234	0.45807		-0.021745	0.95245	0.99946		-0.083124	0.81942	0.96763
Myosin-11	Myosin-11	MYH11	GR	3.05258	0.0183421	0.0336372	na		0.38849	0.090503	0.26742		0.21623	0.54851	0.99946		-0.2025	0.57475	0.91266
Unconventional myosin-Ic	Unconventional myosin-Ic	MYO1C	GR	1.42708	0.0260226	0.0448925	na		0.17359	0.46421	0.57659		-0.067796	0.85238	0.99946		-0.34106	0.33482	0.87144
Neutrophil cytosol factor 2	Neutrophil cytosol factor 2	NCF2	GR	2.20476	0.00282727	0.00705051	na		0.22826	0.33307	0.48623		-0.17034	0.63801	0.99861		-0.38189	0.27615	0.90718
Nidogen-1	Nidogen-1	NID1	GR	1.95044	0.00508864	0.0118659	na		0.31731	0.17282	0.33078		-0.00083644	0.99817	0.99946		0.11754	0.74641	0.95802
Olfactomedin-like protein 3	Olfactomedin-like protein 3	OLFML3	GR	704.207	0.0237084	0.040205	0.04		0.11885	0.61773	0.76748		-0.23116	0.52051	0.99322		-0.27217	0.44681	0.93425
Prolyl 4-hydroxylase subunit alpha-2	Prolyl 4-hydroxylase subunit alpha-2	P4HA2	GR	3.23987	0.015253	0.0289217	na		0.001114	0.99628	0.99744		-0.19504	0.58921	0.99322		0.13326	0.71361	0.93425
PRKC apoptosis WT1 regulator protein	PRKC apoptosis WT1 regulator protein	PAWR	GR	2.05448	0.0116603	0.0231302	na		0.085742	0.71928	0.8472		-0.49054	0.15001	0.99322		0.31606	0.37364	0.93425
Procollagen C-endopeptidase enhancer 1	Procollagen C-endopeptidase enhancer 1	PCOLCE	GR	2.56419	0.00881798	0.0184346	na		0.33414	0.14991	0.32562		0.19306	0.59307	0.99861		-0.39128	0.26352	0.90718
PDZ and LIM domain protein 3	PDZ and LIM domain protein 3	PDLIM3	GR	2.23338	0.00482954	0.0113734	na		0.38328	0.095291	0.26835		0.23677	0.51014	0.99946		-0.39606	0.25721	0.87144
PDZ and LIM domain protein 4	PDZ and LIM domain protein 4	PDLIM4	GR	2.63756	0.00047315	0.00187714	na		0.27978	0.2322	0.37863		-0.28192	0.43001	0.99946		-0.16665	0.6454	0.92586
Plasminogen	Plasminogen	PLG	GR	2.12738	0.00567523	0.0129819	na		0.1023	0.66781	0.74709		-0.42979	0.21511	0.99946		-0.25941	0.4692	0.90225
Protein phosphatase 1 regulatory subunit 12B	Protein phosphatase 1 regulatory subunit 12B	PPP1R12B	GR	2.58905	0.00673057	0.0149194	na		0.34922	0.13125	0.34505		0.3407	0.33536	0.99322		-0.13829	0.7032	0.93425
Prolargin	Prolargin	PRELP	GR	2.0003	0.0276346	0.0471369	na		0.35643	0.12295	0.29279		0.34936	0.32242	0.99946		-0.38861	0.26708	0.87144
Protein kinase C alpha type	Protein kinase C alpha type	PRKCA	GR	1.88457	0.0109769	0.0218677	na		0.11715	0.62281	0.76935		-0.57372	0.082894	0.99322		0.062053	0.86478	0.9493
Vitamin K-dependent protein S	Vitamin K-dependent protein S	PROS1	GR	2.94661	0.0144115	0.0275317	na		0.20399	0.38832	0.58248		-0.29133	0.41411	0.99322		-0.069869	0.84791	0.9493
Peripherin	Peripherin	PRPH	GR	1.72283	0.00939718	0.0193414	na		0.41235	0.070809	0.26544		0.29381	0.40996	0.99946		-0.45112	0.19067	0.87144
26S proteasome non-ATPase regulatory subunit 9	26S proteasome non-ATPase regulatory subunit 9	PSMD9	GR	1.84279	0.000612093	0.00226734	na		0.42593	0.061136	0.26483		0.29911	0.40117	0.99861		0.13749	0.70485	0.95684
Prostacyclin synthase	Prostacyclin synthase	PTGIS	GR	2.25891	0.0113297	0.0214389	na		0.27047	0.24877	0.40529		0.21134	0.5578	0.99861		-0.43013	0.21469	0.90718
Septin-9	Septin-9	SEPTIN9	GR	1.36504	0.0197686	0.035853	na		0.10771	0.65126	0.73444		-0.32041	0.36674	0.99946		-0.064114	0.86032	0.97575
Pigment epithelium-derived factor	Pigment epithelium-derived factor	SERPINF1	GR	1.76811	0.0134778	0.0259431	na		0.34763	0.13313	0.29856		0.19241	0.59435	0.99946		-0.49245	0.14819	0.87144
Alpha-2-antiplasmin	Alpha-2-antiplasmin	SERPINF2	GR	1.67824	0.00928807	0.0191592	na		0.25845	0.27124	0.43032		-0.10934	0.76366	0.99861		-0.0021272	0.99535	0.9975
Sorbin and SH3 domain-containing protein 2	Sorbin and SH3 domain-containing protein 2	SORBS2	GR	1.9828	0.0196639	0.0357095	na		0.23468	0.31928	0.47204		0.046378	0.89877	0.99861		-0.54859	0.10057	0.90718
Spectrin alpha chain, erythrocytic 1	Spectrin alpha chain, erythrocytic 1	SPTA1	GR	3.13555	0.00715155	0.0155927	na		0.32305	0.16474	0.33941		-0.12641	0.72786	0.99861		0.23367	0.51585	0.90718
Spectrin beta chain, erythrocytic	Spectrin beta chain, erythrocytic	SPTB	GR	1.51821	0.00881082	0.0184334	na		0.28083	0.23038	0.37692		-0.025168	0.94498	0.99946		0.17534	0.62802	0.91897
Erythrocyte band 7 integral membrane protein	Erythrocyte band 7 integral membrane protein	STOM	GR	1.76782	0.0199272	0.0360238	na		0.11153	0.6397	0.72558		-0.33714	0.34077	0.99946		0.22539	0.53125	0.91189
Transgelin	Transgelin	TAGLN	GR	2.52091	0.008609	0.0181042	na		0.39749	0.082653	0.26544		0.40599	0.24437	0.99946		-0.50332	0.13807	0.87144
Serotransferrin	Serotransferrin	TF	GR	1.43566	0.00923229	0.0190864	na		0.39657	0.083426	0.26544		0.47259	0.1678	0.99946		-0.5586	0.09327	0.87144
Tropomodulin-1	Tropomodulin-1	TMOD1	GR	3.52457	0.00282727	0.00705051	na		0.23747	0.31339	0.51495		-0.22586	0.53038	0.99322		0.028809	0.93703	0.97478
Tenascin	Tenascin	TNC	GR	3.91333	0.0118848	0.023484	na		0.012239	0.95916	0.97407		-0.61724	0.057277	0.99946		-0.027787	0.93926	0.99416
Tenascin-X	Tenascin-X	TNXB	GR	3.89535	0.0196176	0.0356486	na		0.39565	0.084218	0.27796		0.13091	0.7185	0.99861		0.065317	0.85773	0.98232
Tropomyosin alpha-1 chain	Tropomyosin alpha-1 chain	TPM1	GR	3.14504	0.000796511	0.0027431	na		0.41797	0.066677	0.26544		0.26117	0.46608	0.99946		-0.3693	0.29361	0.87144
Tryptase alpha/beta-1	Tryptase alpha/beta-1	TPSAB1	GR	1.70681	0.0218607	0.0387662	na		0.22795	0.33375	0.45938		0.066748	0.85464	0.99946		-0.39466	0.25905	0.87144
Versican core protein	Versican core protein	VCAN	GR	2.36313	0.00818761	0.0174636	na		0.091845	0.70016	0.76593		-0.24051	0.50327	0.99946		-0.39351	0.26056	0.87144
Zyxin	Zyxin	ZYX	GR	1.40222	0.0270302	0.0463446	na		0.29372	0.20878	0.36022		0.2397	0.50475	0.99946		-0.22265	0.5364	0.91189
Retinal dehydrogenase 2	Retinal dehydrogenase 2	ALDH1A2	PR	0.023931	0.0432856	0.0676912	na		-0.10572	0.65733	0.80051	pos	0.78755	0.006835	0.99322		-0.19742	0.58458	0.93425
Carcinoembryonic antigen-related cell adhesion molecule 6	Carcinoembryonic antigen-related cell adhesion molecule 6	CEACAM6	PR	0.031264	0.0317349	0.0513234	na	neg	-0.6413	0.0023082	0.20263	neg	-0.78515	0.0071276	0.93881		-0.15164	0.67581	0.94918
Cleavage and polyadenylation specificity factor subunit 3	Cleavage and polyadenylation specificity factor subunit 3	CPSF3	PR	0.000956504	0.0432856	0.0676912	na		0.079411	0.73929	0.86134		0.49543	0.14537	0.99322		0.17948	0.6198	0.93425
Guanylate-binding protein 5	Guanylate-binding protein 5	GBP5	PR	0.00568471	0.0695154	0.100893	na		-0.11493	0.62946	0.77424		0.19257	0.59403	0.99322		0.099242	0.78503	0.93425
Corticosteroid 11-beta-dehydrogenase isozyme 1	Corticosteroid 11-beta-dehydrogenase isozyme 1	HSD11B1	PR	0.00253161	0.176491	0.229702	na	neg	-0.56999	0.0086944	0.19757		-0.51078	0.13138	0.99322		-0.34712	0.32574	0.93425
Myoglobin	Myoglobin	MB	PR	0.00211695	0.0625413	0.0926673	0.04		-0.38111	0.097338	0.30926		-0.14504	0.68931	0.99322		-0.51762	0.12542	0.93425
Neurolysin, mitochondrial	Neurolysin, mitochondrial	NLN	PR	0.00165963	0.0584521	0.0867925	na		-0.21523	0.36212	0.56077		0.14522	0.68895	0.99322		-0.093506	0.79723	0.93645
Ribosome biogenesis regulatory protein homolog	Ribosome biogenesis regulatory protein homolog	RRS1	PR	0.00217516	0.0348571	0.0562425	na		-0.26958	0.25039	0.46301		-0.07779	0.83086	0.99322		0.19105	0.59699	0.93425
Replication termination factor 2	Replication termination factor 2	RTF2	PR	0.00461178	0.0406812	0.0637255	na		-0.44052	0.051898	0.24417		-0.43174	0.21279	0.99322		0.43082	0.21388	0.93425
Suprabasin	Suprabasin	SBSN	PR	0.0375118	0.0788775	0.112343	na		0.060981	0.79842	0.90453		0.45538	0.18599	0.99322	pos	0.77851	0.0079806	0.93425
Shootin-1	Shootin-1	SHTN1	PR	0.00179272	0.153041	0.202868	na		0.084366	0.72361	0.84882		0.48851	0.15196	0.99322		-0.038101	0.91677	0.96906
Alpha-1B-glycoprotein	Alpha-1B-glycoprotein	A1BG		1.31733	0.273036	0.331417	na		0.35149	0.12859	0.29592		0.24135	0.50174	0.99946		-0.047255	0.89686	0.97865
Alpha-2-macroglobulin	Alpha-2-macroglobulin	A2M		1.50668	0.0717256	0.106786	na		0.28319	0.22632	0.37592		0.14125	0.6971	0.99946		-0.19376	0.59171	0.91645
Mth938 domain-containing protein	Mth938 domain-containing protein	AAMDC		0.990818	1	1	na		0.0071336	0.97619	0.98993		0.065845	0.85659	0.99322		0.29542	0.40728	0.93425
4-aminobutyrate aminotransferase, mitochondrial	4-aminobutyrate aminotransferase, mitochondrial	ABAT		0.625468	0.316433	0.377046	na		-0.022843	0.92385	0.96482		0.23347	0.51622	0.99322		0.32687	0.3566	0.93425
Mycophenolic acid acyl-glucuronide esterase, mitochondrial	Mycophenolic acid acyl-glucuronide esterase, mitochondrial	ABHD10		0.481892	0.0803556	0.117566	na		-0.33746	0.14565	0.3243		-0.25453	0.4779	0.99861		0.044309	0.90326	0.98874
Abl interactor 1	Abl interactor 1	ABI1		0.548218	0.0376353	0.0590205	na	neg	-0.45786	0.042352	0.23229		-0.39175	0.2629	0.99322		0.050677	0.88943	0.95844
Medium-chain specific acyl-CoA dehydrogenase, mitochondrial	Medium-chain specific acyl-CoA dehydrogenase, mitochondrial	ACADM		0.74729	0.0885959	0.127485	na		-0.18764	0.42824	0.57409		0.084832	0.81576	0.99861		-0.15981	0.65921	0.94285
Very long-chain specific acyl-CoA dehydrogenase, mitochondrial	Very long-chain specific acyl-CoA dehydrogenase, mitochondrial	ACADVL		1.14556	0.49913	0.561672	0.04		-0.23706	0.31424	0.44462		-0.28814	0.41947	0.99946		-0.22526	0.5315	0.91189
Cytoplasmic aconitate hydratase	Cytoplasmic aconitate hydratase	ACO1		0.722739	0.0453143	0.0717069	na		-0.23876	0.31069	0.44199		0.055706	0.87852	0.99946		-0.24355	0.49772	0.90225
Acyl-coenzyme A thioesterase 2, mitochondrial	Acyl-coenzyme A thioesterase 2, mitochondrial	ACOT2		0.522547	0.161972	0.211892	na		-0.069578	0.77068	0.84347		0.28809	0.41956	0.99861		-0.30802	0.38657	0.90718
Cytosolic acyl coenzyme A thioester hydrolase	Cytosolic acyl coenzyme A thioester hydrolase	ACOT7		0.664732	0.344704	0.405714	na		-0.26419	0.26035	0.41777		-0.28703	0.42134	0.99861		0.07014	0.84732	0.97827
Lysosomal acid phosphatase	Lysosomal acid phosphatase	ACP2		1.04558	0.730294	0.779501	na		-0.18241	0.44145	0.62617		-0.61923	0.05625	0.99322		0.28018	0.43299	0.93425
Long-chain-fatty-acid--CoA ligase 1	Long-chain-fatty-acid--CoA ligase 1	ACSL1		1.05056	0.856092	0.885908	0.06		-0.025821	0.91395	0.95088		-0.084131	0.81726	0.99861		0.12043	0.74035	0.95971
Long-chain-fatty-acid--CoA ligase 4	Long-chain-fatty-acid--CoA ligase 4	ACSL4		0.73119	0.472676	0.534055	na		0.21548	0.36155	0.51091		0.31928	0.36853	0.99861		0.34605	0.32734	0.90718
Beta-actin-like protein 2	Beta-actin-like protein 2	ACTBL2		0.653588	0.443631	0.508229	na		0.073977	0.75659	0.80945		0.29568	0.40685	0.99946		-0.16881	0.64106	0.92453
Actin-like protein 6A	Actin-like protein 6A	ACTL6A		0.368582	0.212294	0.267089	na		-0.16527	0.48622	0.61491		0.08284	0.82003	0.99861		-0.2448	0.49545	0.90718
Alpha-actinin-4	Alpha-actinin-4	ACTN4		0.968309	0.738485	0.78336	na		0.18002	0.44758	0.56234		0.29375	0.41005	0.99946		0.3483	0.324	0.87144
Beta-centractin	Beta-centractin	ACTR1B		0.487533	0.10375	0.145809	na		-0.17789	0.45304	0.63524		0.031943	0.9302	0.99479		-0.069449	0.84881	0.9493
Aminoacylase-1	Aminoacylase-1	ACY1		1.19474	0.574978	0.632	na		-0.15175	0.52305	0.69072		-0.12398	0.73293	0.99322		-0.18505	0.60879	0.93425
Disintegrin and metalloproteinase domain-containing protein 10	Disintegrin and metalloproteinase domain-containing protein 10	ADAM10		0.126016	0.063214	0.0931807	na		-0.088944	0.70922	0.8365		0.18028	0.61821	0.99322		0.40242	0.24895	0.93425
Alcohol dehydrogenase 1B	Alcohol dehydrogenase 1B	ADH1B		0.923711	0.811145	0.847243	na		0.23213	0.32471	0.45525		0.59177	0.07152	0.99946		-0.59572	0.069172	0.87144
Alcohol dehydrogenase class-3	Alcohol dehydrogenase class-3	ADH5		0.948228	0.689855	0.739357	na		0.097044	0.684	0.7569		0.36437	0.3006	0.99946		-0.39917	0.25315	0.87144
Adipogenesis regulatory factor	Adipogenesis regulatory factor	ADIRF		0.609181	0.0836435	0.121577	na		0.031966	0.89357	0.95485		0.47852	0.16179	0.99322		-0.082215	0.82136	0.94497
Adipocyte enhancer-binding protein 1	Adipocyte enhancer-binding protein 1	AEBP1		1.6007	0.0937436	0.133516	na		0.026864	0.91049	0.93727		-0.19514	0.58901	0.99946		-0.25218	0.48213	0.90225
AFG3-like protein 2	AFG3-like protein 2	AFG3L2		0.525188	0.140465	0.186908	na		0.074237	0.75576	0.83703		0.11586	0.74993	0.99861		-0.16579	0.64714	0.94285
Afamin	Afamin	AFM		1.25892	0.319388	0.380243	na		0.4053	0.076258	0.27764		0.48277	0.15756	0.99861		0.24846	0.48883	0.90718
Acylglycerol kinase, mitochondrial	Acylglycerol kinase, mitochondrial	AGK		0.631521	0.308869	0.370087	na		0.019861	0.93377	0.96652		0.252	0.48244	0.99322		-0.058983	0.87142	0.94974
Glycogen debranching enzyme	Glycogen debranching enzyme	AGL		0.364188	0.126395	0.172795	na		-0.0017147	0.99428	0.99686		0.22596	0.53019	0.99322		-0.078746	0.82881	0.9467
Angiotensinogen	Angiotensinogen	AGT		1.24977	0.260428	0.319585	na		0.31042	0.18285	0.33809		0.35554	0.31333	0.99946		-0.38298	0.27468	0.87144
Neuroblast differentiation-associated protein AHNAK	Neuroblast differentiation-associated protein AHNAK	AHNAK		1.17328	0.101659	0.143328	na	pos	0.58621	0.0066001	0.26544	pos	0.82971	0.002979	0.58329		-0.54075	0.10654	0.87144
Protein AHNAK2	Protein AHNAK2	AHNAK2		1.88256	0.117004	0.161312	na		0.17877	0.45078	0.58457		0.092274	0.79986	0.99861		-0.21516	0.55053	0.90718
Alpha-hemoglobin-stabilizing protein	Alpha-hemoglobin-stabilizing protein	AHSP		0.760476	0.505995	0.568481	0.04		0.10307	0.66544	0.8081		0.20379	0.57226	0.99322		0.091772	0.80093	0.93737
Allograft inflammatory factor 1	Allograft inflammatory factor 1	AIF1		1.28914	0.376205	0.43909	na		-0.13738	0.56355	0.682		-0.20522	0.56952	0.99861		-0.30482	0.39178	0.90718
AH receptor-interacting protein	AH receptor-interacting protein	AIP		0.454698	0.10398	0.143524	na		-0.074787	0.75401	0.83664		0.11968	0.74193	0.99861		0.29996	0.39976	0.90718
Adenylate kinase 4, mitochondrial	Adenylate kinase 4, mitochondrial	AK4		0.789161	0.313533	0.37439	na		0.22759	0.33452	0.53437	pos	0.65239	0.040901	0.99322		-0.21345	0.55378	0.93425
A-kinase anchor protein 12	A-kinase anchor protein 12	AKAP12		1.23944	0.39681	0.45911	na		0.23129	0.32652	0.45713		0.22754	0.52724	0.99946		-0.082217	0.82136	0.96763
Aldo-keto reductase family 1 member A1	Aldo-keto reductase family 1 member A1	AKR1A1		0.703745	0.0492848	0.0769008	na		-0.18319	0.43948	0.55501		0.13897	0.70182	0.99946		-0.11243	0.75715	0.95878
Aldo-keto reductase family 1 member B1	Aldo-keto reductase family 1 member B1	AKR1B1		1.08689	0.65244	0.705757	0.22		-0.041569	0.86186	0.89378		-0.073155	0.84083	0.99946		-0.20318	0.57344	0.91266
Aldo-keto reductase family 1 member C1	Aldo-keto reductase family 1 member C1	AKR1C1		1	0.814753	0.855813	na		-0.28545	0.22247	0.38621		-0.38452	0.27259	0.99861		0.0033194	0.99274	0.9975
Aflatoxin B1 aldehyde reductase member 2	Aflatoxin B1 aldehyde reductase member 2	AKR7A2		0.753854	0.121076	0.16642	na		0.027226	0.90929	0.94721		0.50423	0.13724	0.99861		-0.38931	0.26614	0.90718
Delta-aminolevulinic acid dehydratase	Delta-aminolevulinic acid dehydratase	ALAD		0.896839	0.479376	0.542723	na		0.00021366	0.99929	0.99929		0.17504	0.62861	0.99861		-0.15547	0.66802	0.94918
Aldehyde dehydrogenase family 16 member A1	Aldehyde dehydrogenase family 16 member A1	ALDH16A1		0.728476	0.250081	0.309197	na		0.13594	0.56768	0.68283		0.26792	0.45422	0.99861		0.19526	0.58878	0.92036
Retinal dehydrogenase 1	Retinal dehydrogenase 1	ALDH1A1		0.879784	0.401455	0.463493	na		-0.092738	0.69737	0.76531		0.094786	0.79451	0.99946		-0.31435	0.37637	0.89588
Aldehyde dehydrogenase family 1 member A3	Aldehyde dehydrogenase family 1 member A3	ALDH1A3		0.457061	0.216048	0.273165	na		-0.29969	0.19925	0.4216		-0.37836	0.281	0.99322		-0.11513	0.75147	0.93425
Aldehyde dehydrogenase X, mitochondrial	Aldehyde dehydrogenase X, mitochondrial	ALDH1B1		0.629739	0.0440739	0.0700616	na		-0.23248	0.32396	0.45484		0.223	0.53573	0.99946	neg	-0.65987	0.037877	0.87144
Mitochondrial 10-formyltetrahydrofolate dehydrogenase	Mitochondrial 10-formyltetrahydrofolate dehydrogenase	ALDH1L2		0.640928	0.57017	0.627107	na		-0.12315	0.60498	0.7571		0.074283	0.8384	0.99322		-0.24584	0.49356	0.93425
Fatty aldehyde dehydrogenase	Fatty aldehyde dehydrogenase	ALDH3A2		0.398474	0.139868	0.186908	na		-0.23909	0.31	0.465		-0.029442	0.93565	0.99861		-0.40203	0.24944	0.90718
Fructose-bisphosphate aldolase A	Fructose-bisphosphate aldolase A	ALDOA		0.835285	0.0718639	0.106877	na		-0.19309	0.4147	0.53111		0.031906	0.93028	0.99946		-0.071112	0.84523	0.97575
Arachidonate 15-lipoxygenase	Arachidonate 15-lipoxygenase	ALOX15		0.529309	0.0890538	0.127946	na		-0.41186	0.071173	0.2721		-0.33873	0.33836	0.99322		-0.17108	0.63653	0.93425
Arachidonate 5-lipoxygenase	Arachidonate 5-lipoxygenase	ALOX5		1.327	0.553508	0.612742	na		-0.20991	0.37441	0.57157		-0.29235	0.4124	0.99322		-0.23903	0.50598	0.93425
Protein AMBP	Protein AMBP	AMBP		1.47105	0.0339581	0.056221	na		0.29639	0.20448	0.35913		0.15652	0.66588	0.99946		-0.30634	0.3893	0.89588
AMP deaminase 3	AMP deaminase 3	AMPD3		1.21547	0.556585	0.615173	na		-0.43356	0.056162	0.25541		-0.51908	0.12417	0.99322		-0.10643	0.76981	0.93425
Ankyrin-1	Ankyrin-1	ANK1		1.0995	0.715863	0.761756	na		-0.040927	0.86398	0.91532		-0.44199	0.20091	0.99861		0.33533	0.34353	0.90718
Rabankyrin-5	Rabankyrin-5	ANKFY1		0.621116	0.0348615	0.0573428	na		-0.15241	0.52123	0.68937		0.20534	0.56929	0.99322		-0.38635	0.27012	0.93425
Aminopeptidase N	Aminopeptidase N	ANPEP		0.804393	0.49618	0.558577	na		-0.39411	0.085542	0.27796		-0.3269	0.35655	0.99861		0.087819	0.80937	0.96166
Annexin A1	Annexin A1	ANXA1		1.15453	0.335563	0.396291	na		-0.069454	0.77108	0.82048		-0.35717	0.31096	0.99946		-0.047939	0.89537	0.97865
Annexin A13	Annexin A13	ANXA13		0.87357	0.532105	0.591628	na		-0.016936	0.9435	0.97276		0.082813	0.82008	0.99861		0.23963	0.50488	0.90718
Annexin A3	Annexin A3	ANXA3		0.573092	0.128537	0.175038	na	neg	-0.44423	0.049731	0.26544		-0.31688	0.37234	0.99946		-0.029585	0.93534	0.99312
Annexin A5	Annexin A5	ANXA5		1.19468	0.0964969	0.136949	na		0.14635	0.5381	0.64153		-0.025658	0.94391	0.99946		-0.27702	0.43842	0.90222
Annexin A6	Annexin A6	ANXA6		1.12815	0.240879	0.299411	na		0.045473	0.84902	0.8814		-0.10718	0.76821	0.99946		-0.415	0.23305	0.87144
Annexin A8	Annexin A8	ANXA8L1		1	0.670405	0.727162	0.02		-0.26254	0.26344	0.46962		-0.39873	0.25372	0.99322		0.16736	0.64399	0.93425
Amiloride-sensitive amine oxidase [copper-containing]	Amiloride-sensitive amine oxidase [copper-containing]	AOC1		0.374323	0.118102	0.162573	0.02		-0.26254	0.26344	0.46962		-0.39873	0.25372	0.99322		0.16736	0.64399	0.93425
AP-1 complex subunit mu-1	AP-1 complex subunit mu-1	AP1M1		0.727045	0.249978	0.309197	na		-0.20301	0.39066	0.58293		-0.13134	0.7176	0.99322		-0.13511	0.70979	0.93425
AP-2 complex subunit alpha-1	AP-2 complex subunit alpha-1	AP2A1		0.782677	0.0779434	0.114216	na		-0.24798	0.29181	0.42875		-0.055989	0.87791	0.99946		0.1216	0.7379	0.95671
AP-3 complex subunit beta-1	AP-3 complex subunit beta-1	AP3B1		0.700061	0.103285	0.145396	na		0.13278	0.5768	0.69172		0.49678	0.1441	0.99861		0.37329	0.28802	0.90718
AP-3 complex subunit mu-1	AP-3 complex subunit mu-1	AP3M1		1.12947	0.782278	0.821701	na		-0.30809	0.18633	0.40823		-0.4666	0.174	0.99322		0.12086	0.73944	0.93425
Serum amyloid P-component	Serum amyloid P-component	APCS		1.31626	0.185877	0.237708	na		-0.094861	0.69077	0.76015		-0.40307	0.24811	0.99946		-0.40993	0.23938	0.87144
Adipocyte plasma membrane-associated protein	Adipocyte plasma membrane-associated protein	APMAP		0.708442	0.262759	0.321598	na		-0.21923	0.35306	0.47333		-0.081506	0.82289	0.99946		0.29346	0.41054	0.90222
Apolipoprotein A-IV	Apolipoprotein A-IV	APOA4		1.03544	0.861027	0.889425	na	pos	0.51179	0.021071	0.24371	pos	0.75535	0.011524	0.99861		-0.00058644	0.99872	0.9997
Apolipoprotein B-100	Apolipoprotein B-100	APOB		1.54963	0.05762	0.0882306	na		0.22005	0.35122	0.47151		0.011702	0.9744	0.99946		-0.12745	0.7257	0.95266
Apolipoprotein B receptor	Apolipoprotein B receptor	APOBR		0.975236	0.937843	0.959837	na		-0.11689	0.6236	0.7262		0.026674	0.94169	0.99861		0.20394	0.57198	0.91234
Apolipoprotein C-I	Apolipoprotein C-I	APOC1		1.99242	0.0370905	0.060475	na		0.4216	0.064103	0.26647		0.29507	0.40786	0.99861		-0.33267	0.34762	0.90718
Apolipoprotein C-II	Apolipoprotein C-II	APOC2		1.1042	0.782661	0.821794	na		-0.37868	0.09967	0.29005		-0.37215	0.28961	0.99861		-0.14464	0.69014	0.94918
Apolipoprotein D	Apolipoprotein D	APOD		1.21042	0.342863	0.403887	na		-0.071296	0.76517	0.81596		-0.085269	0.81482	0.99946		-0.62272	0.054476	0.87144
Apolipoprotein E	Apolipoprotein E	APOE		1.50221	0.0310671	0.0520518	na		0.38589	0.09287	0.26751		0.27349	0.44451	0.99946		-0.31544	0.37464	0.89584
Beta-2-glycoprotein 1	Beta-2-glycoprotein 1	APOH		1.27521	0.190226	0.244501	na		0.085247	0.72084	0.77971		-0.10606	0.77059	0.99946		-0.21622	0.54851	0.91189
Apolipoprotein L1	Apolipoprotein L1	APOL1		1.49881	0.373774	0.436617	na		0.012906	0.95693	0.98034		-0.00025144	0.99945	0.99998		-0.27329	0.44486	0.93425
Apolipoprotein L2	Apolipoprotein L2	APOL2		0.736493	0.472676	0.534055	na		-0.36397	0.11466	0.30431		-0.3939	0.26005	0.99861		-0.096543	0.79077	0.96153
ADP-ribosylation factor 5	ADP-ribosylation factor 5	ARF5		0.66284	0.0694553	0.103737	na		-0.38753	0.091372	0.26742		-0.17358	0.63153	0.99946		-0.21893	0.54339	0.91189
ADP-ribosylation factor GTPase-activating protein 1	ADP-ribosylation factor GTPase-activating protein 1	ARFGAP1		1.27712	0.634095	0.688848	na		0.19787	0.40301	0.59113		0.33124	0.34982	0.99322		0.59023	0.072448	0.93425
Brefeldin A-inhibited guanine nucleotide-exchange protein 1	Brefeldin A-inhibited guanine nucleotide-exchange protein 1	ARFGEF1		0.125314	0.0305764	0.0503834	na	neg	-0.48092	0.031828	0.2211		-0.4483	0.1938	0.99322		0.45044	0.19142	0.93425
Rho GTPase-activating protein 1	Rho GTPase-activating protein 1	ARHGAP1		0.97377	0.78862	0.825877	na		0.21585	0.36072	0.47836		0.35393	0.31568	0.99946		0.29963	0.40031	0.89588
Rho GDP-dissociation inhibitor 2	Rho GDP-dissociation inhibitor 2	ARHGDIB		1.25028	0.419066	0.481469	na		-0.23873	0.31075	0.44199		-0.30558	0.39055	0.99946		0.045293	0.90112	0.97865
E3 ubiquitin-protein ligase ARIH1	E3 ubiquitin-protein ligase ARIH1	ARIH1		1	0.584779	0.642016	na		0.29705	0.20343	0.42464		0.31986	0.36761	0.99322		0.2685	0.45319	0.93425
ADP-ribosylation factor-like protein 6-interacting protein 1	ADP-ribosylation factor-like protein 6-interacting protein 1	ARL6IP1		0.578258	0.0363926	0.0595108	na		-0.13141	0.58079	0.73864		0.22898	0.52456	0.99322		0.20161	0.57647	0.93425
ADP-ribosylation factor-like protein 8A	ADP-ribosylation factor-like protein 8A	ARL8A		0.546912	0.208424	0.265086	na		-0.34613	0.13494	0.31859		-0.46481	0.17589	0.99861		-0.18732	0.60432	0.92569
ADP-ribosylation factor-like protein 8B	ADP-ribosylation factor-like protein 8B	ARL8B		0.804176	0.156371	0.207578	na		-0.012107	0.9596	0.97431		0.18359	0.61165	0.99861		0.40524	0.24533	0.90718
Actin-related protein 2/3 complex subunit 1B	Actin-related protein 2/3 complex subunit 1B	ARPC1B		1.12579	0.681781	0.732954	na		-0.17639	0.45694	0.56973		-0.18508	0.60872	0.99946		0.41902	0.22809	0.87144
Actin-related protein 2/3 complex subunit 2	Actin-related protein 2/3 complex subunit 2	ARPC2		0.842447	0.459796	0.522887	0.04	neg	-0.46246	0.040063	0.26544		-0.41584	0.232	0.99946		0.42439	0.22156	0.87144
Beta-arrestin-1	Beta-arrestin-1	ARRB1		0.600384	0.166939	0.219005	na		0.24028	0.30752	0.51115	pos	0.66022	0.037739	0.99322		0.096604	0.79064	0.93425
Argininosuccinate lyase	Argininosuccinate lyase	ASL		0.355328	0.0756616	0.10826	na		0.17786	0.45312	0.58583		0.41401	0.23428	0.99861		-0.24234	0.49993	0.90718
Probable bifunctional dTTP/UTP pyrophosphatase/methyltransferase protein	Probable bifunctional dTTP/UTP pyrophosphatase/methyltransferase protein	ASMTL		0.913787	0.842486	0.874196	na		-0.051934	0.82786	0.92452		-0.00081203	0.99822	0.99998		-0.24131	0.50181	0.93425
Aspartyl/asparaginyl beta-hydroxylase	Aspartyl/asparaginyl beta-hydroxylase	ASPH		0.640089	0.0648763	0.097524	na		-0.38199	0.096504	0.28581		-0.22299	0.53575	0.99861		0.077732	0.83098	0.97632
Asporin	Asporin	ASPN		1.4316	0.239186	0.297704	na		0.23523	0.31812	0.47108		0.055131	0.87977	0.99861		0.034867	0.92382	0.9975
ATPase family AAA domain-containing protein 3B	ATPase family AAA domain-containing protein 3B	ATAD3B		only in B	0.00491056	0.249367	na		-0.33736	0.14578	0.3243		na	na	na		0.26054	0.46721	0.90718
Ubiquitin-like-conjugating enzyme ATG3	Ubiquitin-like-conjugating enzyme ATG3	ATG3		0.697797	0.112659	0.15639	na		-0.20557	0.38458	0.53529		-0.049005	0.89306	0.99861		0.49904	0.142	0.90718
Atlastin-3	Atlastin-3	ATL3		1.282	0.0723358	0.107351	na		0.37974	0.09865	0.2731		0.46493	0.17577	0.99946		-0.25686	0.47374	0.90225
Sarcoplasmic/endoplasmic reticulum calcium ATPase 3	Sarcoplasmic/endoplasmic reticulum calcium ATPase 3	ATP2A3		0.653111	0.185877	0.237708	na		-0.33706	0.14616	0.3243		-0.20397	0.57191	0.99861		-0.18337	0.6121	0.92971
ATPase inhibitor, mitochondrial	ATPase inhibitor, mitochondrial	ATP5IF1		0.649895	0.156955	0.208155	0.3		-0.24723	0.29331	0.45091		-0.32042	0.36672	0.99861		-0.075916	0.83489	0.97632
V-type proton ATPase subunit C 1	V-type proton ATPase subunit C 1	ATP6V1C1		0.540982	0.140465	0.186908	na		-0.24264	0.30265	0.45992		-0.023844	0.94787	0.99861		-0.092382	0.79963	0.96153
V-type proton ATPase subunit H	V-type proton ATPase subunit H	ATP6V1H		0.552286	0.031504	0.0526261	na		-0.27644	0.23807	0.45959		-0.070169	0.84726	0.99322		0.1473	0.68469	0.93425
Ataxin-2-like protein	Ataxin-2-like protein	ATXN2L		0.322735	0.030621	0.0514278	na		-0.26316	0.26229	0.46853		-0.081701	0.82247	0.99322		0.29787	0.40321	0.93425
Azurocidin	Azurocidin	AZU1		0.628116	0.57075	0.627107	na		-0.37703	0.10128	0.29056		-0.4328	0.21155	0.99861		-0.0092032	0.97987	0.9975
Brain acid soluble protein 1	Brain acid soluble protein 1	BASP1		1.23303	0.40877	0.470996	na		-0.10567	0.65748	0.73915		-0.092015	0.80041	0.99946		-0.4362	0.20757	0.87144
Apoptosis regulator BAX	Apoptosis regulator BAX	BAX		1.02973	0.886365	0.912165	na		0.11778	0.62091	0.72492		0.21289	0.55485	0.99861		-0.20964	0.56104	0.90886
Breast carcinoma-amplified sequence 1	Breast carcinoma-amplified sequence 1	BCAS1		1.01028	0.9737	0.987847	na		0.25159	0.2846	0.48911		0.55083	0.098908	0.99322		-0.28651	0.42223	0.93425
Pre-mRNA-splicing factor SPF27	Pre-mRNA-splicing factor SPF27	BCAS2		0.0773307	0.03367	0.0543901	na		-0.34227	0.13963	0.35153		-0.32054	0.36652	0.99322		0.43001	0.21484	0.93425
3-hydroxybutyrate dehydrogenase type 2	3-hydroxybutyrate dehydrogenase type 2	BDH2		0.844182	0.427355	0.490186	na		0.048593	0.83879	0.92672		0.34786	0.32464	0.99322		-0.41312	0.23538	0.93425
Myc box-dependent-interacting protein 1	Myc box-dependent-interacting protein 1	BIN1		0.748567	0.293007	0.352897	na		-0.12784	0.59119	0.74636		-0.030802	0.93268	0.99479		-0.21085	0.55872	0.93425
Bleomycin hydrolase	Bleomycin hydrolase	BLMH		0.616659	0.0602217	0.0917617	na		-0.25999	0.26829	0.42733		0.039575	0.91356	0.99861		-0.21924	0.54281	0.90718
Biliverdin reductase A	Biliverdin reductase A	BLVRA		0.899879	0.488675	0.55124	na		0.020718	0.93091	0.9513		0.18369	0.61146	0.99946		-0.089938	0.80484	0.96763
Flavin reductase (NADPH)	Flavin reductase (NADPH)	BLVRB		0.995717	0.967806	0.983654	na		0.20767	0.37964	0.49739		0.53252	0.11304	0.99946		0.21869	0.54384	0.91189
Ribosome biogenesis protein BOP1	Ribosome biogenesis protein BOP1	BOP1		0.560782	0.0814818	0.118778	na		-0.34964	0.13076	0.34505		-0.28237	0.42926	0.99322		0.5386	0.10821	0.93425
Bisphosphoglycerate mutase	Bisphosphoglycerate mutase	BPGM		1.30839	0.241322	0.298103	na		0.27095	0.2479	0.40529		0.11058	0.76104	0.99861		0.20806	0.56406	0.91216
Bactericidal permeability-increasing protein	Bactericidal permeability-increasing protein	BPI		0.920111	0.857349	0.88688	na		-0.30296	0.19414	0.36332		-0.27351	0.44448	0.99861		-0.070584	0.84636	0.97827
ADP-ribosyl cyclase/cyclic ADP-ribose hydrolase 2	ADP-ribosyl cyclase/cyclic ADP-ribose hydrolase 2	BST1		2.21241	0.134365	0.182056	na		0.12983	0.58539	0.74339		-0.098888	0.78579	0.99322		0.18958	0.59988	0.93425
Protein BUD31 homolog	Protein BUD31 homolog	BUD31		only in B	0.0388671	0.728563	na		-0.26845	0.25246	0.46374		na	na	na		0.14275	0.69401	0.93425
Complement C1q subcomponent subunit B	Complement C1q subcomponent subunit B	C1QB		1.16623	0.495264	0.557772	na		-0.07079	0.7668	0.84121		-0.23003	0.52259	0.99861		-0.28138	0.43094	0.90718
Complement C1r subcomponent	Complement C1r subcomponent	C1R		1.80815	0.0849288	0.12316	na		0.024175	0.91942	0.95549		-0.18474	0.6094	0.99861		-0.2819	0.43006	0.90718
Complement C1s subcomponent	Complement C1s subcomponent	C1S		1.7812	0.0433746	0.0691468	na		-0.013407	0.95526	0.97311		-0.37286	0.28862	0.99861		-0.27875	0.43545	0.90718
Complement C2	Complement C2	C2		0.801753	0.188818	0.243027	na		-0.093413	0.69527	0.78681		0.10266	0.77778	0.99861		-0.0067805	0.98517	0.9975
Complement C3	Complement C3	C3		1.51455	0.042521	0.0679023	na		0.32121	0.1673	0.32725		0.16565	0.64743	0.99946		-0.28694	0.4215	0.90222
Complement C4-A	Complement C4-A	C4A		1.51534	0.0807108	0.117839	na		0.22103	0.34903	0.4692		0.13678	0.70633	0.99946		-0.14621	0.68692	0.94091
C4b-binding protein alpha chain	C4b-binding protein alpha chain	C4BPA		1.50466	0.148315	0.198297	na		0.053387	0.82312	0.86271		-0.24608	0.49313	0.99946		0.25784	0.472	0.90225
Complement component C6	Complement component C6	C6		1.52041	0.16895	0.221331	na		0.0031209	0.98958	0.99208		-0.5017	0.13955	0.99861		-0.2289	0.52471	0.90718
Complement component C8 beta chain	Complement component C8 beta chain	C8B		1.71292	0.17633	0.229706	na		-0.18959	0.42337	0.57063		-0.49394	0.14678	0.99861		-0.42924	0.21576	0.90718
Complement component C9	Complement component C9	C9		1.14092	0.571663	0.628851	na		-0.13728	0.56384	0.66288		-0.13526	0.70947	0.99946		-0.3943	0.25952	0.87144
Carbonic anhydrase 1	Carbonic anhydrase 1	CA1		1.34593	0.0756616	0.10826	na		0.068409	0.77444	0.82316		-0.15811	0.66266	0.99946		-0.017522	0.96168	0.99428
Carbonic anhydrase 2	Carbonic anhydrase 2	CA2		0.96592	0.867761	0.894338	na		0.091556	0.70106	0.76593		0.19346	0.5923	0.99946		-0.15163	0.67583	0.94091
Calcium-binding protein 39-like	Calcium-binding protein 39-like	CAB39L		3.38688	0.18004	0.234211	0.04		0.31643	0.17408	0.34537		0.14139	0.69682	0.99861		0.47956	0.16075	0.90718
Calmodulin-like protein 3	Calmodulin-like protein 3	CALML3		1	1	1	na		-0.21672	0.35874	0.50927		-0.34594	0.3275	0.99861		-0.04701	0.89739	0.98855
Calumenin	Calumenin	CALU		1.57903	0.0462286	0.0728237	na		-0.0089518	0.97012	0.98012		-0.33748	0.34026	0.99946		-0.39021	0.26494	0.87144
Calcium/calmodulin-dependent protein kinase type II subunit delta	Calcium/calmodulin-dependent protein kinase type II subunit delta	CAMK2D		0.580019	0.0756616	0.10826	na	neg	-0.57915	0.0074535	0.21328		-0.59096	0.072002	0.99861		-0.25663	0.47415	0.90718
Calcium/calmodulin-dependent protein kinase type II subunit gamma	Calcium/calmodulin-dependent protein kinase type II subunit gamma	CAMK2G		1.9658	0.212294	0.267089	na		-0.13821	0.56117	0.68055		-0.33965	0.33696	0.99861		-0.048179	0.89485	0.98776
Cathelicidin antimicrobial peptide	Cathelicidin antimicrobial peptide	CAMP		1.26828	0.677585	0.727883	na		-0.18184	0.44291	0.58102		-0.37036	0.29212	0.99861		0.25638	0.47461	0.90718
Adenylyl cyclase-associated protein 2	Adenylyl cyclase-associated protein 2	CAP2		1.31732	0.272802	0.331999	na		0.32342	0.16423	0.33941		0.34664	0.32646	0.99861		0.22488	0.5322	0.90718
Calpain-2 catalytic subunit	Calpain-2 catalytic subunit	CAPN2		0.851417	0.251554	0.310332	na		0.099944	0.67504	0.75347		0.46484	0.17586	0.99946		-0.14556	0.68825	0.94091
F-actin-capping protein subunit alpha-2	F-actin-capping protein subunit alpha-2	CAPZA2		0.830455	0.0640692	0.0966227	na		0.056718	0.81226	0.87149		0.45394	0.18757	0.99861		0.16034	0.65814	0.94285
Caspase-14	Caspase-14	CASP14		1	1	1	0.1		0.28458	0.22396	0.44739		0.33034	0.3512	0.99322		-0.27217	0.44681	0.93425
Caspase-3	Caspase-3	CASP3		1.30792	0.509802	0.572068	na		0.015799	0.94729	0.97311		-0.053228	0.88389	0.99861		-0.084209	0.81709	0.96557
Calpastatin	Calpastatin	CAST		0.78106	0.186618	0.240639	na		-0.27748	0.23623	0.38124		-0.10777	0.76698	0.99946		-0.26068	0.46695	0.90225
Catalase	Catalase	CAT		0.888479	0.367824	0.430386	na		-0.40355	0.077654	0.26544		-0.42685	0.2186	0.99946		0.27534	0.44132	0.90222
Caveolae-associated protein 2	Caveolae-associated protein 2	CAVIN2		1.06761	0.850107	0.883643	na		0.12735	0.59261	0.7061		0.25905	0.46986	0.99861		-0.20281	0.57415	0.91409
Caveolae-associated protein 3	Caveolae-associated protein 3	CAVIN3		1.55083	0.0382496	0.062075	na		0.21549	0.36153	0.51091		-0.056791	0.87617	0.99861		-0.09949	0.78451	0.96153
Carbonyl reductase [NADPH] 1	Carbonyl reductase [NADPH] 1	CBR1		1.0969	0.631306	0.686619	na		-0.0047935	0.984	0.99006		0.0026943	0.99411	0.99946		-0.4268	0.21866	0.87144
Carbonyl reductase [NADPH] 3	Carbonyl reductase [NADPH] 3	CBR3		1	0.956883	0.983287	na		0.20032	0.3971	0.51563		0.4836	0.15674	0.99946		-0.018604	0.95932	0.99428
Chromobox protein homolog 1	Chromobox protein homolog 1	CBX1		0.511963	0.241322	0.298103	na		-0.028784	0.90412	0.94689		0.096538	0.79078	0.99861		0.3865	0.26991	0.90718
CD109 antigen	CD109 antigen	CD109		1.71947	0.0519465	0.0803797	na		0.31311	0.17888	0.39912		0.30715	0.388	0.99322		-0.052286	0.88594	0.95844
Monocyte differentiation antigen CD14	Monocyte differentiation antigen CD14	CD14		1.10479	0.612733	0.668763	na		-0.02734	0.90891	0.94721		-0.053042	0.8843	0.99861		-0.21264	0.55531	0.90718
CD151 antigen	CD151 antigen	CD151		1.29828	0.155477	0.206784	0.02		0.26364	0.26139	0.41777		0.24194	0.50066	0.99861		-0.19666	0.58605	0.92036
Scavenger receptor cysteine-rich type 1 protein M130	Scavenger receptor cysteine-rich type 1 protein M130	CD163		1.0283	0.902047	0.926597	na		-0.20666	0.38202	0.53253		-0.22162	0.53832	0.99861		-0.3287	0.35375	0.90718
Scavenger receptor cysteine-rich type 1 protein M160	Scavenger receptor cysteine-rich type 1 protein M160	CD163L1		8.62407	0.063214	0.0931807	na		0.15327	0.51885	0.68834		-0.049068	0.89292	0.99322		-0.22082	0.53983	0.93425
ADP-ribosyl cyclase/cyclic ADP-ribose hydrolase 1	ADP-ribosyl cyclase/cyclic ADP-ribose hydrolase 1	CD38		0.588665	0.0451546	0.0682819	0.06		-0.27303	0.24414	0.40529		-0.1123	0.75742	0.99861		-0.074769	0.83735	0.97749
CD59 glycoprotein	CD59 glycoprotein	CD59		1.03263	0.724762	0.769681	na		-0.25021	0.28735	0.4258		-0.43058	0.21416	0.99946		-0.42315	0.22306	0.87144
HLA class II histocompatibility antigen gamma chain	HLA class II histocompatibility antigen gamma chain	CD74		0.602745	0.130798	0.177857	na		-0.095722	0.6881	0.78362		0.099794	0.78386	0.99861		0.35838	0.30922	0.90718
CD81 antigen	CD81 antigen	CD81		1.03189	0.783494	0.822359	na		0.33901	0.14369	0.3243		0.58283	0.077014	0.99861		-0.14254	0.69446	0.94918
CD82 antigen	CD82 antigen	CD82		1.18353	0.633092	0.688293	na		-0.27149	0.24691	0.46301		-0.24662	0.49215	0.99322		-0.043024	0.90606	0.96789
CD9 antigen	CD9 antigen	CD9		0.694361	0.0767901	0.112822	na		0.14477	0.54255	0.66527	pos	0.71632	0.019781	0.99861		-0.32652	0.35714	0.90718
Cytidine deaminase	Cytidine deaminase	CDA		1.33238	0.245959	0.304776	na	neg	-0.50144	0.024292	0.2211	neg	-0.63891	0.046748	0.99322		-0.47761	0.16271	0.93425
Hsp90 co-chaperone Cdc37	Hsp90 co-chaperone Cdc37	CDC37		0.699154	0.114076	0.157808	na		-0.12179	0.60901	0.71487		0.19374	0.59175	0.99861		0.085299	0.81476	0.96498
Cell division control protein 42 homolog	Cell division control protein 42 homolog	CDC42		0.800766	0.0368027	0.060111	0.12		-0.18173	0.44321	0.55828		0.033872	0.92599	0.99946		0.35878	0.30863	0.87144
Cadherin-13	Cadherin-13	CDH13		1.71811	0.054025	0.0833197	na		0.20878	0.37704	0.57355		-0.11055	0.7611	0.99322		0.25501	0.47704	0.93425
Phosphatidate cytidylyltransferase 2	Phosphatidate cytidylyltransferase 2	CDS2		1.48306	0.483776	0.546818	na		0.12358	0.60372	0.7571		0.14793	0.68338	0.99322		-0.3345	0.3448	0.93425
Carcinoembryonic antigen-related cell adhesion molecule 8	Carcinoembryonic antigen-related cell adhesion molecule 8	CEACAM8		2.12714	0.114959	0.160219	na		-0.14984	0.52834	0.65436		-0.38776	0.26822	0.99861		0.16268	0.6534	0.94285
Chymotrypsin-like elastase family member 2A	Chymotrypsin-like elastase family member 2A	CELA2A		0.589244	0.567825	0.627107	#REF!		-0.12687	0.59402	0.74774		0.047698	0.8959	0.99322		-0.46724	0.17334	0.93425
Chymotrypsin-like elastase family member 3A	Chymotrypsin-like elastase family member 3A	CELA3A		20.5977	0.0788775	0.112343	na		0.14901	0.53067	0.69544		-0.093382	0.7975	0.99322		-0.26251	0.46372	0.93425
Liver carboxylesterase 1	Liver carboxylesterase 1	CES1		0.803503	0.520523	0.578981	na		-0.069709	0.77026	0.82048		0.11794	0.74556	0.99946		0.14214	0.69528	0.94091
Cocaine esterase	Cocaine esterase	CES2		0.723174	0.194469	0.249267	0.12		0.031293	0.8958	0.94151		0.30785	0.38685	0.99861		-0.088799	0.80728	0.96166
Complement factor B	Complement factor B	CFB		1.36724	0.0659378	0.0989066	na		0.14662	0.53734	0.64141		0.013244	0.97103	0.99946		-0.45812	0.18303	0.87144
Complement factor H-related protein 1	Complement factor H-related protein 1	CFHR1		1.40623	0.212294	0.267089	na		-0.0085089	0.9716	0.98219		-0.40887	0.24071	0.99861		0.13453	0.71098	0.95684
Complement factor H-related protein 2	Complement factor H-related protein 2	CFHR2		2.17068	0.100906	0.142411	na		0.2207	0.34976	0.50345		-0.11873	0.7439	0.99861		0.33286	0.34732	0.90718
Cofilin-2	Cofilin-2	CFL2		1.70139	0.0770093	0.113034	na		0.39676	0.083272	0.26544		0.26729	0.45531	0.99946		0.35495	0.3142	0.87144
Chromogranin-A	Chromogranin-A	CHGA		0.578067	0.185877	0.237708	na		0.019655	0.93445	0.96678	pos	0.64275	0.045028	0.99861		-0.56497	0.0888	0.90718
Chitinase-3-like protein 1	Chitinase-3-like protein 1	CHI3L1		1.41282	0.510472	0.57259	na	neg	-0.45305	0.044855	0.23229		-0.61245	0.059794	0.99322		-0.44337	0.19935	0.93425
Charged multivesicular body protein 4a	Charged multivesicular body protein 4a	CHMP4A		0.250193	0.0493806	0.0769643	na		-0.14976	0.52857	0.69375		0.41993	0.22697	0.99322		-0.00080066	0.99825	0.99855
Charged multivesicular body protein 4b	Charged multivesicular body protein 4b	CHMP4B		0.875846	0.637867	0.692138	0.44		-0.34001	0.14243	0.3243		-0.35555	0.31332	0.99861		0.51835	0.1248	0.90718
Probable cytosolic iron-sulfur protein assembly protein CIAO1	Probable cytosolic iron-sulfur protein assembly protein CIAO1	CIAO1		0.639968	0.240613	0.298103	na		-0.22363	0.34323	0.54215		-0.028632	0.93742	0.99479		-0.40455	0.24621	0.93425
Anamorsin	Anamorsin	CIAPIN1		0.505698	0.0487411	0.0762227	na		-0.26054	0.26724	0.47239		0.0056147	0.98772	0.99913		0.11863	0.74412	0.93425
Cold-inducible RNA-binding protein	Cold-inducible RNA-binding protein	CIRBP		0.647321	0.220701	0.278544	na		-0.42001	0.065223	0.26741		-0.25428	0.47835	0.99322		-0.28828	0.41923	0.93425
CDGSH iron-sulfur domain-containing protein 1	CDGSH iron-sulfur domain-containing protein 1	CISD1		0.906098	0.543113	0.603315	na		-0.066018	0.78214	0.85168		0.14478	0.68985	0.99861		-0.52922	0.11571	0.90718
Cytoskeleton-associated protein 4	Cytoskeleton-associated protein 4	CKAP4		1.12195	0.621295	0.677578	na		-0.19792	0.40291	0.52023		-0.18164	0.61551	0.99946		-0.05813	0.87327	0.97634
Creatine kinase B-type	Creatine kinase B-type	CKB		1.20134	0.599593	0.656425	na		0.30812	0.18629	0.34124		0.47454	0.16581	0.99946		-0.17661	0.62549	0.91897
Creatine kinase S-type, mitochondrial	Creatine kinase S-type, mitochondrial	CKMT2		only in B	0.0146974	0.466476	na		-0.30232	0.19514	0.36332		na	na	na		0.22975	0.52313	0.90718
Galectin-10	Galectin-10	CLC		0.797714	0.445539	0.50833	na		-0.35535	0.12416	0.29391		-0.26947	0.45151	0.99946		0.087852	0.8093	0.96763
Calcium-activated chloride channel regulator 1	Calcium-activated chloride channel regulator 1	CLCA1		0.349444	0.0376353	0.0590205	na		0.030967	0.89688	0.9252		0.53943	0.10757	0.99946		-0.38881	0.26681	0.87144
Clathrin interactor 1	Clathrin interactor 1	CLINT1		0.592713	0.0317456	0.0529346	na		-0.32672	0.15972	0.33805		-0.11752	0.74645	0.99861		0.41825	0.22903	0.90718
Cleft lip and palate transmembrane protein 1	Cleft lip and palate transmembrane protein 1	CLPTM1		0.739615	0.468396	0.532233	na		0.021884	0.92704	0.96482		0.12404	0.73279	0.99322		-0.15169	0.67571	0.93425
Clathrin light chain A	Clathrin light chain A	CLTA		0.961274	0.769568	0.810484	na		0.0065876	0.97801	0.98652		0.087325	0.81043	0.99861		0.022016	0.95186	0.9975
Clusterin	Clusterin	CLU		1.25874	0.170629	0.223112	na		0.035837	0.88077	0.91146		-0.11902	0.74329	0.99946		-0.53805	0.10864	0.87144
Clustered mitochondria protein homolog	Clustered mitochondria protein homolog	CLUH		0.572208	0.163696	0.21556	na	neg	-0.46431	0.039172	0.22944		-0.48332	0.15702	0.99322		0.39816	0.25446	0.93425
Chymase	Chymase	CMA1		1.88789	0.0324224	0.0539344	0.08		0.29521	0.20637	0.37004		0.073289	0.84054	0.99861		0.32408	0.36096	0.90718
Carboxymethylenebutenolidase homolog	Carboxymethylenebutenolidase homolog	CMBL		0.811143	0.333002	0.393599	na		0.11155	0.63962	0.73932		0.44206	0.20083	0.99861		-0.12623	0.72823	0.95684
Calponin-2	Calponin-2	CNN2		0.731921	0.164253	0.21609	na		-0.26149	0.26544	0.40941		-0.089416	0.80596	0.99946		-0.11072	0.76075	0.95878
Calponin-3	Calponin-3	CNN3		1.37135	0.142505	0.191722	na		0.15764	0.50684	0.61778		0.076019	0.83467	0.99946		-0.34365	0.33092	0.87144
Collagen alpha-1(XII) chain	Collagen alpha-1(XII) chain	COL12A1		1.19617	0.61052	0.666607	na		-0.095741	0.68803	0.75932		-0.36401	0.30111	0.99946		-0.079031	0.8282	0.96763
Collagen alpha-1(XVIII) chain	Collagen alpha-1(XVIII) chain	COL18A1		1.05255	0.68301	0.733429	na		0.013795	0.95397	0.9698		-0.051838	0.88691	0.99946		-0.20734	0.56545	0.91266
Collagen alpha-1(I) chain	Collagen alpha-1(I) chain	COL1A1		1.83624	0.105876	0.148152	na		0.24481	0.29822	0.43361		0.13424	0.71159	0.99946		0.057731	0.87413	0.97634
Collagen alpha-2(I) chain	Collagen alpha-2(I) chain	COL1A2		1.72961	0.226667	0.284403	na		0.15995	0.50055	0.61241		0.019931	0.95642	0.99946		0.40167	0.24991	0.87144
Collagen alpha-1(IV) chain	Collagen alpha-1(IV) chain	COL4A1		0.402857	0.0384107	0.0636936	na		-0.22136	0.34829	0.5029		-0.088054	0.80887	0.99861		-0.064748	0.85896	0.98232
Collagen alpha-2(IV) chain	Collagen alpha-2(IV) chain	COL4A2		0.776395	0.327319	0.388526	na		-0.27076	0.24824	0.40529		-0.30704	0.38816	0.99861		0.19587	0.5876	0.92036
Collagen alpha-1(V) chain	Collagen alpha-1(V) chain	COL5A1		2.04596	0.0724961	0.107417	na		0.25868	0.2708	0.47575		0.19077	0.59754	0.99322		0.23747	0.50885	0.93425
Collagen alpha-1(VI) chain	Collagen alpha-1(VI) chain	COL6A1		1.44264	0.0970111	0.137539	na		0.14599	0.53911	0.64195		-0.29024	0.41594	0.99946		0.40089	0.25093	0.87144
Collagen alpha-2(VI) chain	Collagen alpha-2(VI) chain	COL6A2		1.38875	0.171735	0.224453	na		0.0036304	0.98788	0.99295		-0.50527	0.1363	0.99946		-0.080361	0.82534	0.96763
Procollagen galactosyltransferase 1	Procollagen galactosyltransferase 1	COLGALT1		0.782771	0.105249	0.147496	na		-0.28446	0.22416	0.38841		-0.14606	0.68722	0.99861		0.35881	0.30858	0.90718
Cartilage oligomeric matrix protein	Cartilage oligomeric matrix protein	COMP		1.12779	0.821957	0.856294	na		-0.17211	0.46808	0.64899		-0.2297	0.52321	0.99322		-0.23457	0.51419	0.93425
Coatomer subunit epsilon	Coatomer subunit epsilon	COPE		0.86347	0.609257	0.665489	na		-0.31798	0.17185	0.32958		-0.21902	0.54322	0.99946		0.19775	0.58394	0.91645
COP9 signalosome complex subunit 5	COP9 signalosome complex subunit 5	COPS5		0.706334	0.0392158	0.0634219	na		0.051925	0.82789	0.92452		0.49305	0.14762	0.99322		0.028046	0.9387	0.97478
COP9 signalosome complex subunit 8	COP9 signalosome complex subunit 8	COPS8		only in B	0.0388671	0.728563	na		-0.27405	0.24231	0.46158		na	na	na		0.13604	0.70787	0.93425
Atypical kinase COQ8A, mitochondrial	Atypical kinase COQ8A, mitochondrial	COQ8A		0.645623	0.518947	0.578981	na		-0.0036213	0.98791	0.99252		0.16882	0.64105	0.99322		0.20868	0.56287	0.93425
Coronin-1A	Coronin-1A	CORO1A		0.818596	0.379178	0.44219	na		-0.41624	0.06793	0.26544		-0.39937	0.25289	0.99946		0.18693	0.60508	0.91645
Coactosin-like protein	Coactosin-like protein	COTL1		0.727529	0.0341672	0.0565003	na	neg	-0.44855	0.047294	0.26544		-0.30732	0.38771	0.99946		-0.024377	0.94671	0.99428
Cytochrome c oxidase subunit 5A, mitochondrial	Cytochrome c oxidase subunit 5A, mitochondrial	COX5A		0.794675	0.232841	0.291104	na		0.35622	0.12318	0.30696	pos	0.80004	0.0054519	0.83778		0.091041	0.80249	0.96153
Cytochrome c oxidase subunit 5B, mitochondrial	Cytochrome c oxidase subunit 5B, mitochondrial	COX5B		0.570521	0.57017	0.627107	na		-0.049814	0.83479	0.89154		0.11199	0.75808	0.99861		0.044079	0.90376	0.98874
Ceruloplasmin	Ceruloplasmin	CP		1.59868	0.0548083	0.0843414	na		0.27461	0.24131	0.38832		0.11802	0.74539	0.99946		-0.11121	0.75971	0.95878
Carboxypeptidase A1	Carboxypeptidase A1	CPA1		0.476986	0.0398056	0.064079	na		-0.040369	0.86581	0.94125		0.39782	0.25491	0.99322		-0.56905	0.086011	0.93425
Mast cell carboxypeptidase A	Mast cell carboxypeptidase A	CPA3		1.05156	0.909722	0.935858	na		-0.050926	0.83116	0.89018		-0.0066	0.98556	0.99861		-0.29702	0.40462	0.90718
Carboxypeptidase B	Carboxypeptidase B	CPB1		0.0570063	0.0443481	0.0682819	na		-0.39295	0.086544	0.29336		-0.15273	0.67358	0.99322		-0.42807	0.21714	0.93425
Carboxypeptidase B2	Carboxypeptidase B2	CPB2		2.11346	0.0890106	0.127946	na		0.015565	0.94807	0.97409		-0.48372	0.15663	0.99322		0.25147	0.4834	0.93425
Copine-1	Copine-1	CPNE1		0.632203	0.12616	0.172558	na		-0.28178	0.22874	0.37631		-0.38367	0.27374	0.99946		0.064359	0.8598	0.97575
Serine/threonine-protein phosphatase CPPED1	Serine/threonine-protein phosphatase CPPED1	CPPED1		1.00498	0.982336	0.995525	0.06		0.12984	0.58533	0.69923		0.19926	0.58103	0.99861		-0.10211	0.77895	0.96153
Cleavage and polyadenylation specificity factor subunit 6	Cleavage and polyadenylation specificity factor subunit 6	CPSF6		0.229952	0.031209	0.0505022	na		-0.14538	0.54082	0.66491		0.11776	0.74594	0.99861		0.29673	0.4051	0.90718
Probable serine carboxypeptidase CPVL	Probable serine carboxypeptidase CPVL	CPVL		1.00135	0.996646	1	na		-0.044626	0.8518	0.90553		-0.029985	0.93447	0.99861		-0.37201	0.28981	0.90718
Cysteine-rich with EGF-like domain protein 2	Cysteine-rich with EGF-like domain protein 2	CRELD2		1.37611	0.177247	0.23047	na		0.022844	0.92384	0.96482		-0.27189	0.44729	0.99322		-0.3237	0.36155	0.93425
Cysteine-rich protein 2	Cysteine-rich protein 2	CRIP2		1.16971	0.510874	0.57281	na		0.19791	0.40292	0.5528		0.25775	0.47216	0.99861		-0.21048	0.55944	0.90787
Cornulin	Cornulin	CRNN		1	1	1	0.12		-0.14093	0.55343	0.71508		-0.36184	0.30422	0.99322		0.40825	0.2415	0.93425
Lambda-crystallin homolog	Lambda-crystallin homolog	CRYL1		0.623873	0.0756616	0.10826	na		0.18422	0.43686	0.57853		0.44364	0.19904	0.99861		0.3544	0.31501	0.90718
Quinone oxidoreductase	Quinone oxidoreductase	CRYZ		0.986348	0.93984	0.961529	0.04		0.16911	0.476	0.58825		0.37704	0.28282	0.99946		-0.082536	0.82068	0.96763
Casein kinase II subunit alpha'	Casein kinase II subunit alpha'	CSNK2A2		1.99882	0.128295	0.174835	na		0.19895	0.40042	0.59034		-0.057564	0.8745	0.99322		-0.14926	0.68066	0.93425
Cysteine and glycine-rich protein 2	Cysteine and glycine-rich protein 2	CSRP2		0.775762	0.331543	0.392539	na		0.092978	0.69662	0.78681		0.45179	0.18993	0.99861		-0.21823	0.54472	0.90718
Cystatin-C	Cystatin-C	CST3		0.496936	0.0360431	0.0590484	na		0.06997	0.76943	0.84309		0.51684	0.12609	0.99861		-0.10913	0.76411	0.96153
Collagen triple helix repeat-containing protein 1	Collagen triple helix repeat-containing protein 1	CTHRC1		2.61206	0.121225	0.164439	na		-0.0046138	0.9846	0.99252		-0.18181	0.61517	0.99322		-0.27245	0.44632	0.93425
CTP synthase 1	CTP synthase 1	CTPS1		0.682796	0.22548	0.283295	na		-0.21789	0.35609	0.5078		-0.38402	0.27326	0.99861		0.033984	0.92575	0.9975
Cathepsin B	Cathepsin B	CTSB		0.81404	0.43023	0.493054	na		-0.34065	0.14164	0.30771		-0.21051	0.55939	0.99946		-0.22147	0.53861	0.91189
Dipeptidyl peptidase 1	Dipeptidyl peptidase 1	CTSC		0.624388	0.0362652	0.0593372	na		-0.26354	0.26157	0.40672		-0.01328	0.97096	0.99946		-0.077365	0.83177	0.96908
Cathepsin G	Cathepsin G	CTSG		2.16381	0.0451906	0.0715518	0.12		0.09855	0.67934	0.75536		-0.20835	0.5635	0.99946		-0.064619	0.85923	0.97575
Cathepsin L1	Cathepsin L1	CTSL		1.39545	0.426507	0.489615	na		-0.021641	0.92784	0.96482		-0.3202	0.36706	0.99322		-0.066183	0.85586	0.9493
Cathepsin Z	Cathepsin Z	CTSZ		0.700774	0.0644759	0.0970788	na		-0.32816	0.15779	0.33549		-0.12618	0.72834	0.99861		-0.23141	0.52003	0.90718
Cullin-1	Cullin-1	CUL1		0.549012	0.125082	0.171252	na		-0.22035	0.35054	0.54776		-0.089204	0.80641	0.99322		-0.2678	0.45442	0.93425
[truncated: 861 more rows]

## Sheet: percentage
Proteins									Metabolites
GR/PR	Correlation ALL		Correlation Only GR		Correlation Only PR				GR/PR	Correlation ALL		Correlation Only GR		Correlation Only PR
	neg	pos	neg	pos	neg	pos				neg	pos	neg	pos	neg	pos
GR upregulated	0	0.3	0.02	0.01	0.03	0			GR upregulated	0	0.2	0	0	0.13	0
PR upregulated	0.25	0	0.01	0.02	0	0.02			PR upregulated	0.54	0	0	0.08	0.08	0
GR/PR upregulated = FDR<0.05									GR/PR upregulated = p<0.05
Correlation = p<0.05									Correlation = p<0.05
